# Supplementary material for: Unveiling the influence of daily dietary patterns on brain cortical structure: insights from bidirectional Mendelian randomization
Source: Royal Society of Chemistry journal article supplement (doi:10.1039/d3fo02879h), 2023-01-01

Figure1. Mendelian randomization results of causal effects between food type and cortical regions

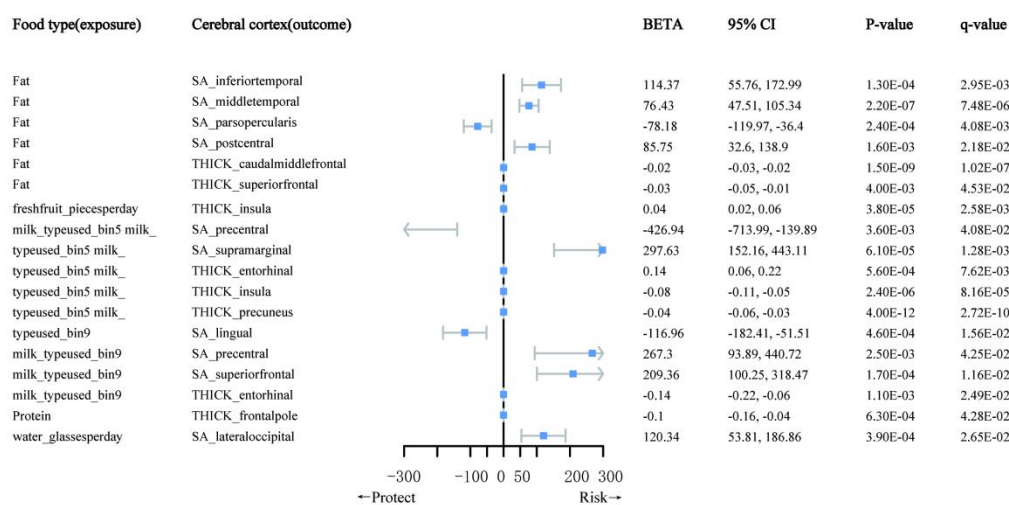

Figure2. Mendelian randomization results of causal effects between cortical regions and food type

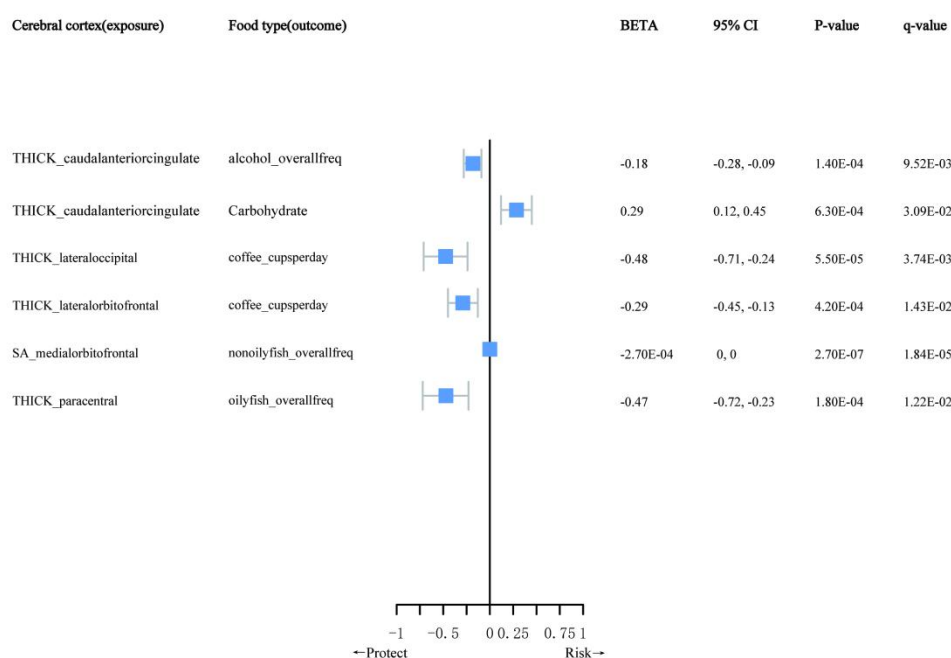

Figure3. forest plots of food type to cortical regions.

(A) Fat

wSA\_inferiortemporal

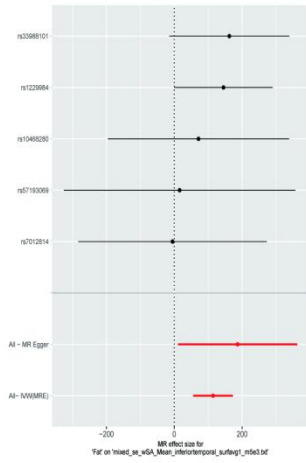

SA\_middletemporal

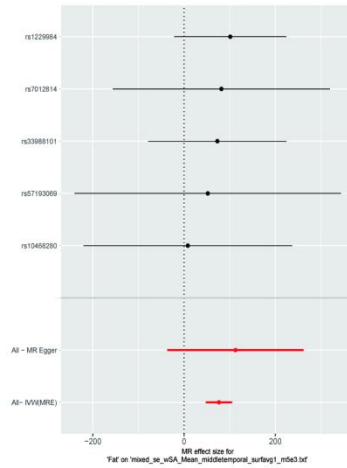

SA\_parsopercularis

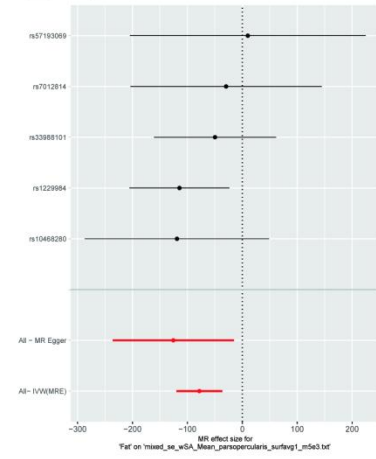

SA\_postcentral

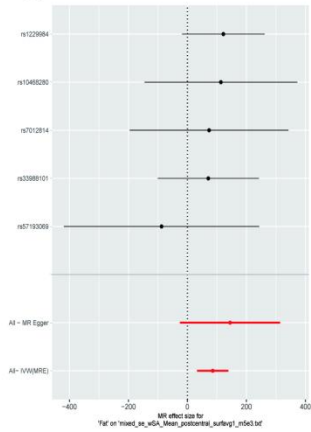

THICK\_caudalmiddlefrontal-lefrontal

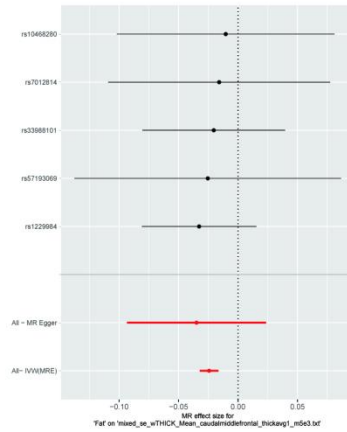

THICK\_superiorfrontal

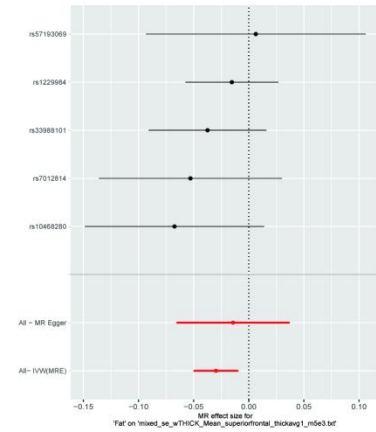

## (B) freshfruit\_piecesperday

THICK\_Mean\_insula

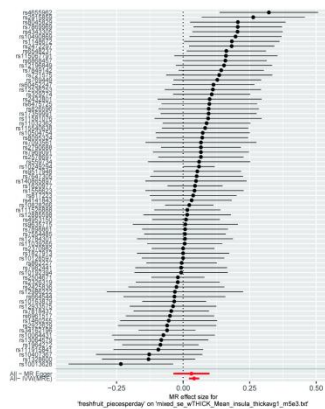

(C) milk\_typeused\_bin5  
SA\_precentral

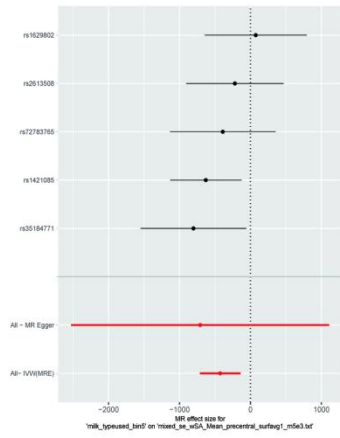

SA\_supramarginal

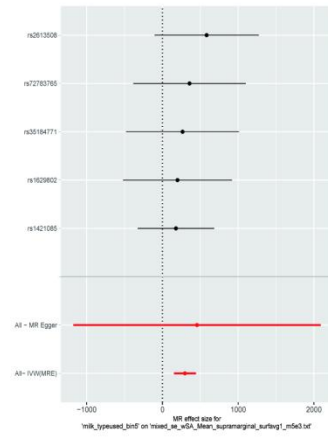

THICK\_entorhinal

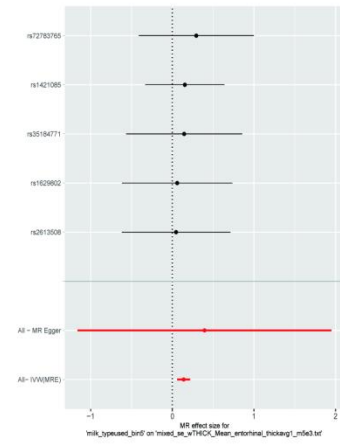

THICK\_insula

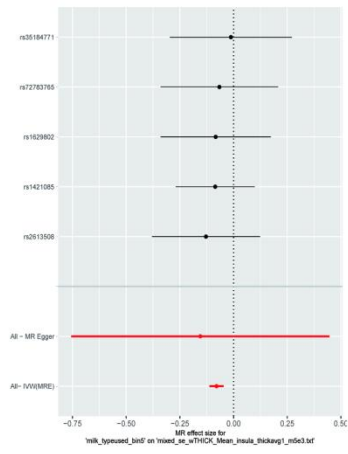

THICK\_pre cuneus

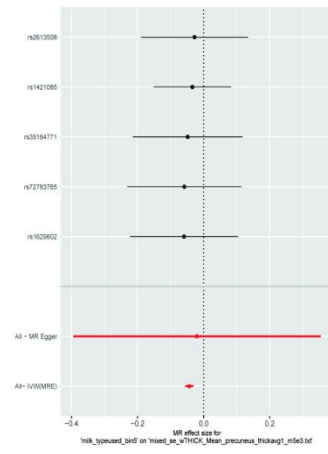

(D) milk\_typeused\_bin9

### SA\_lingual

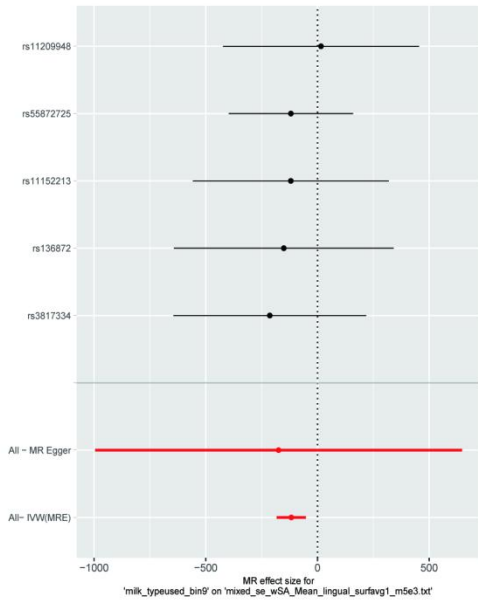

### SA\_precentral

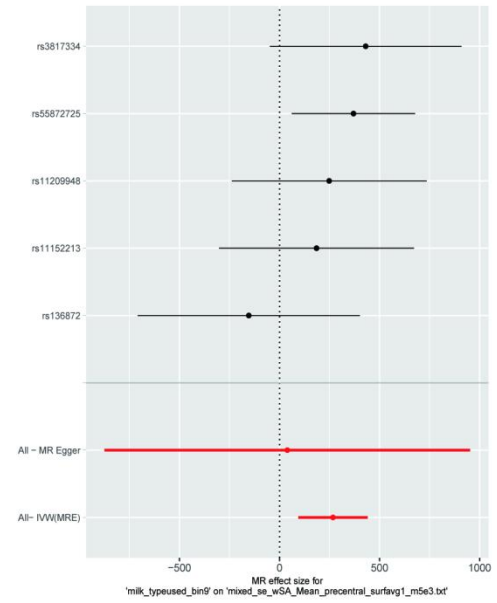

### SA\_superiorfrontal

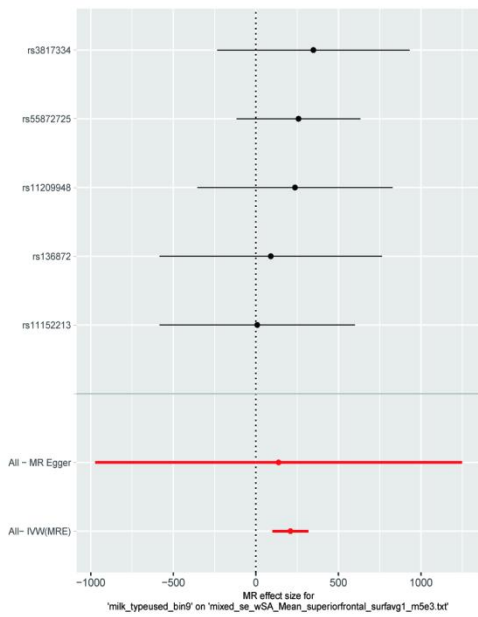

### THICK\_entorhinal

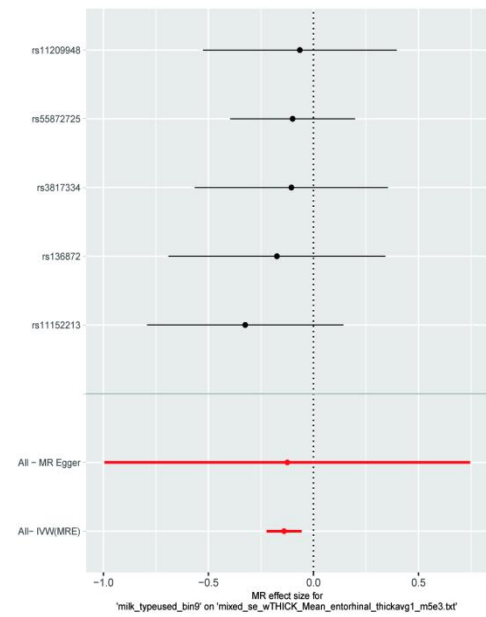

### (E) Protein

## THICK\_frontalpole

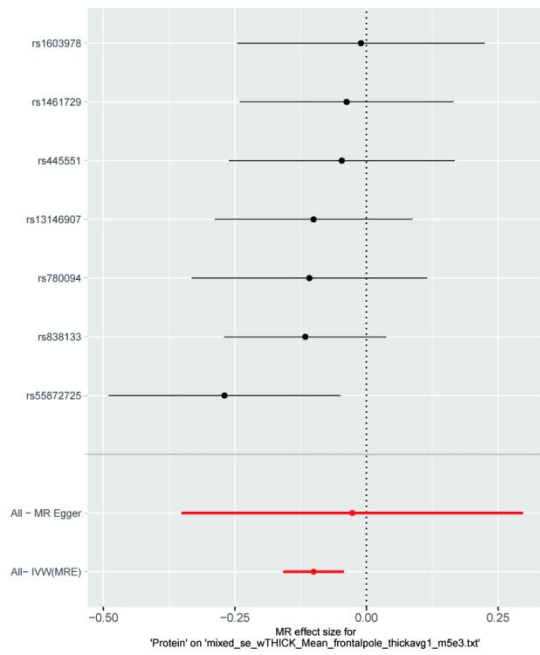

## (F) water\_glassesperday SA\_lateraloccipital

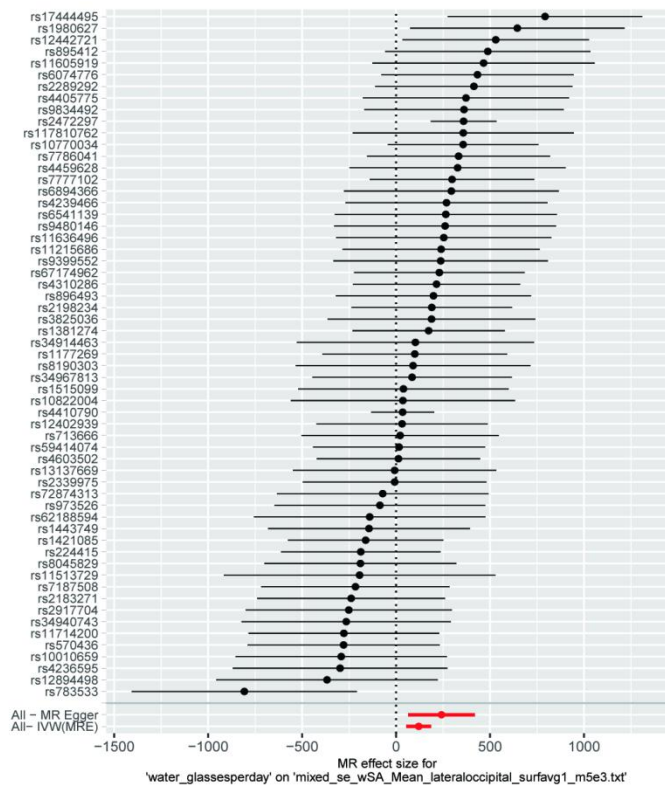

Figure 4. funnel plots of food type to cortical regions.

(A) Fat

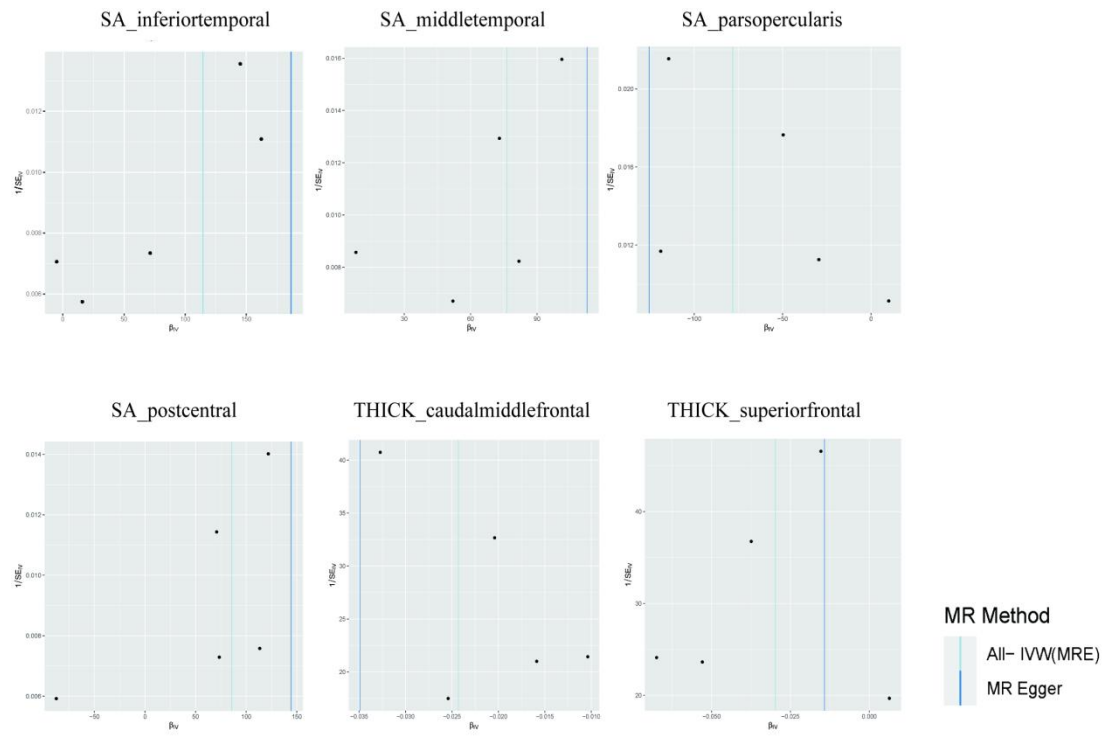

(B) freshfruit\_piecesperday

THICK\_insula

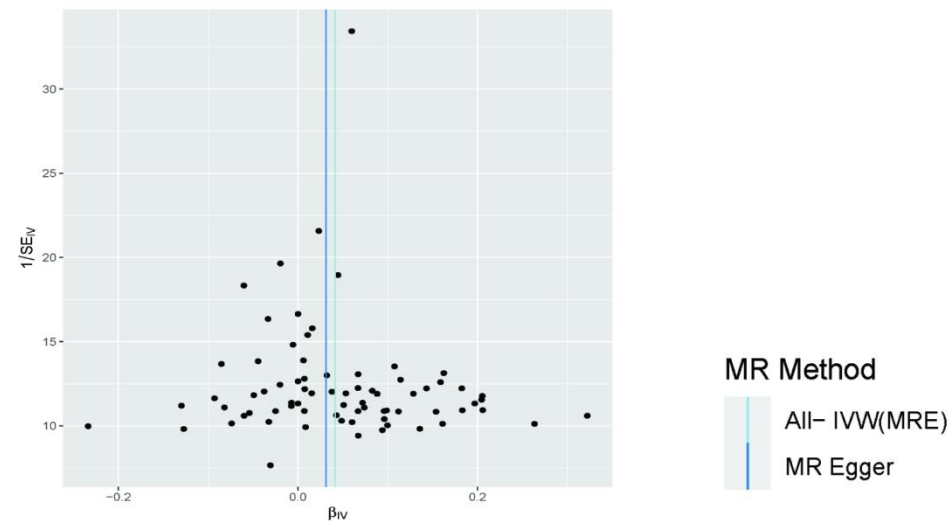

(C) milk\_typeused\_bin5

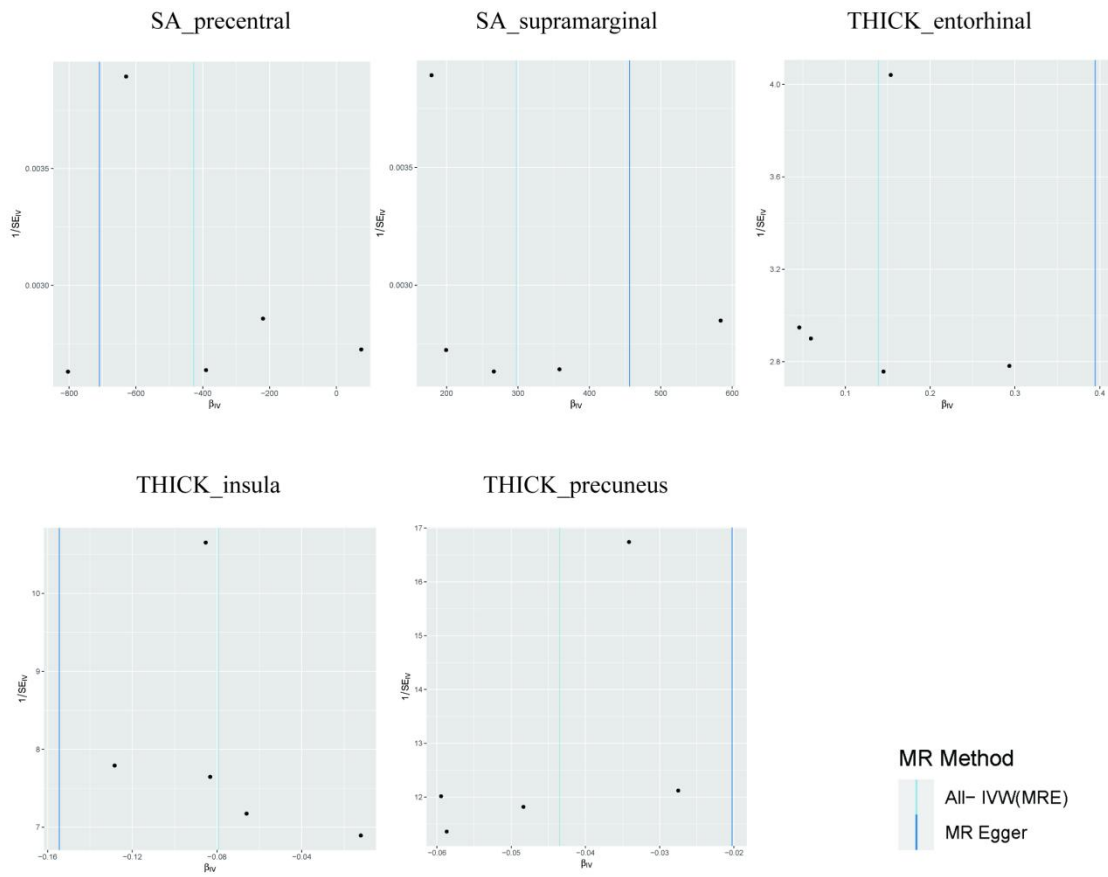

(D) milk\_typeused\_bin9

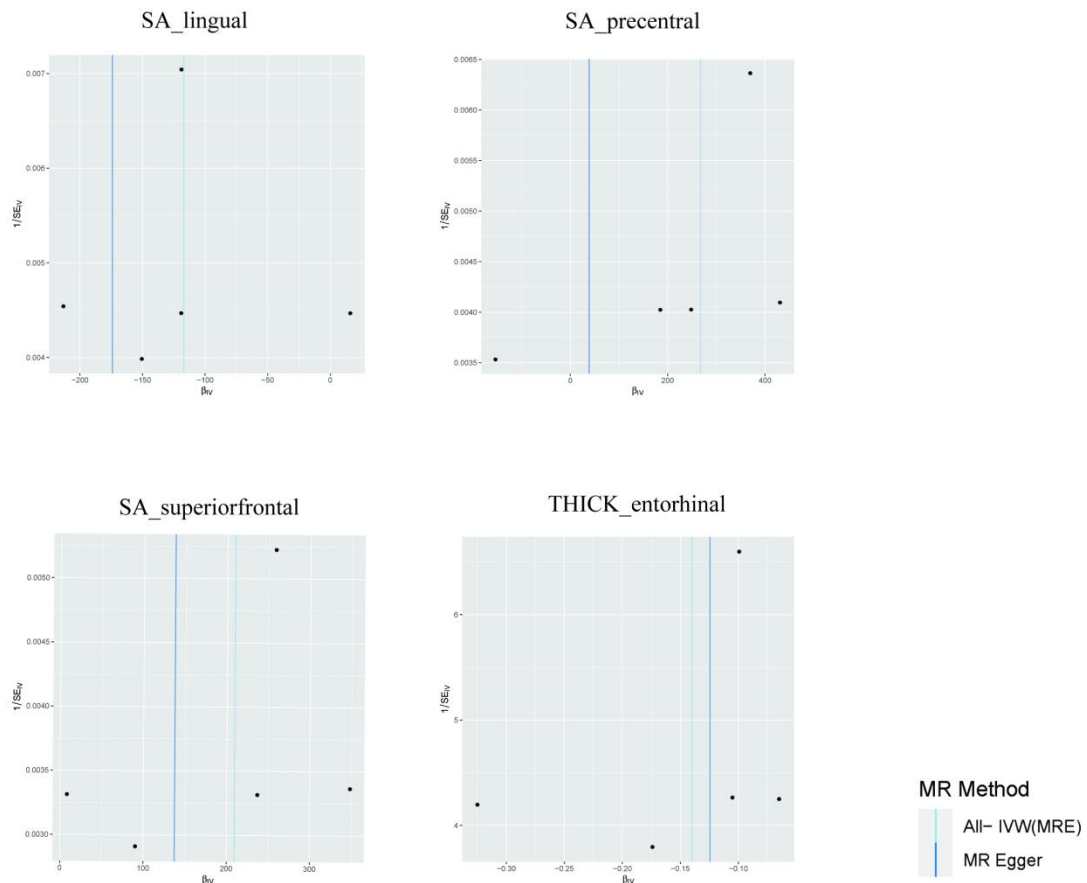

(E) Protein

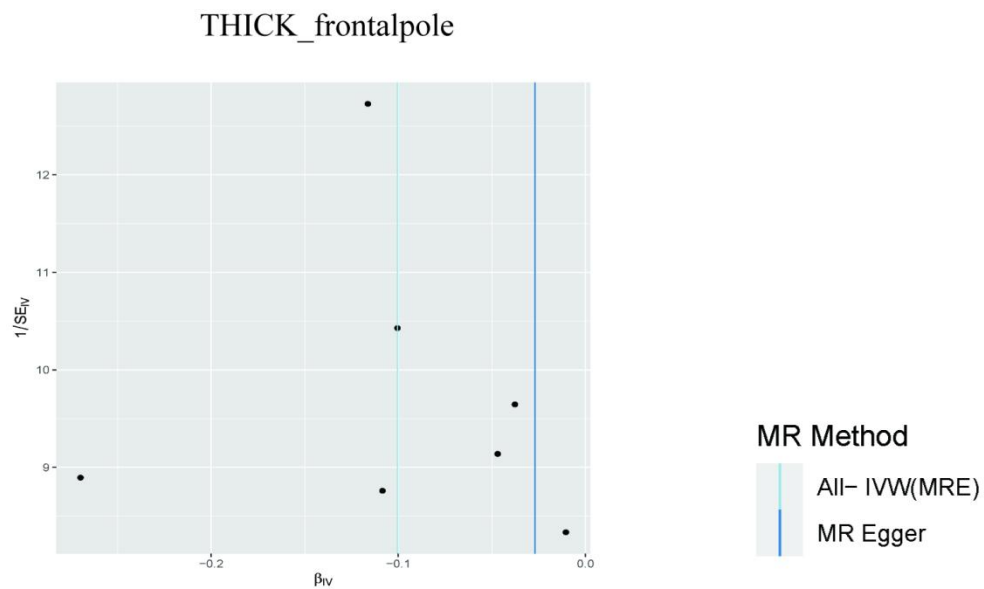

(F) water\_glassesperday



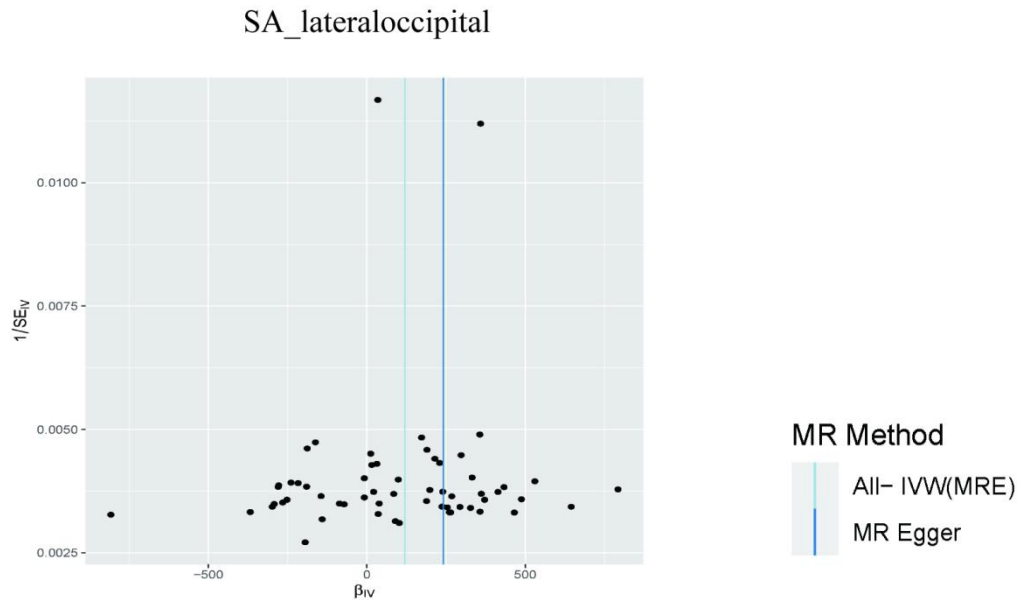

Figure 5. leave-one-out plots of food type to cortical regions.

(A) Fat

SA\_inferiortemporal

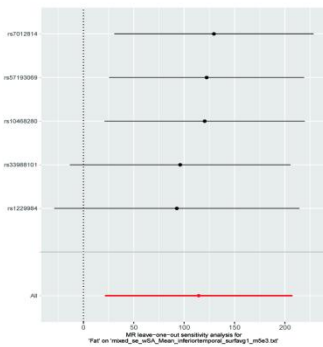

SA\_middletemporal

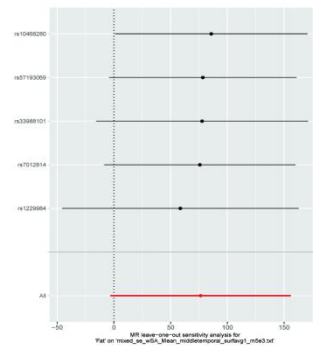

SA\_parsopercularis

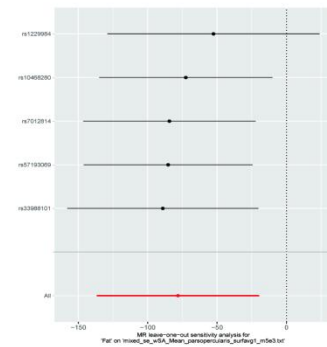

SA\_postcentral

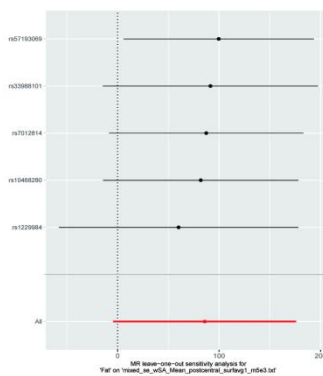

THICK\_caudalmiddlefrontal

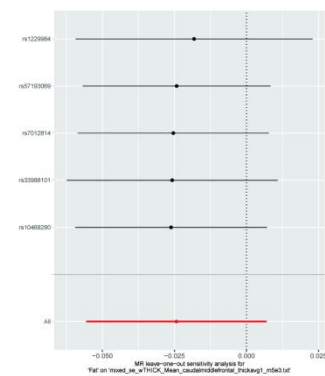

THICK\_superiorfrontal

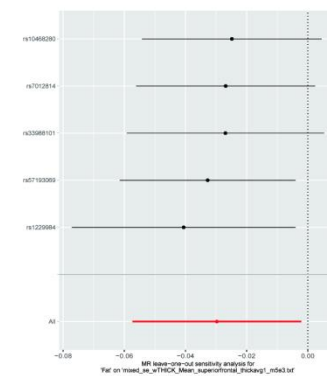

(B) freshfruit\_piecesperday  
THICK\_insula

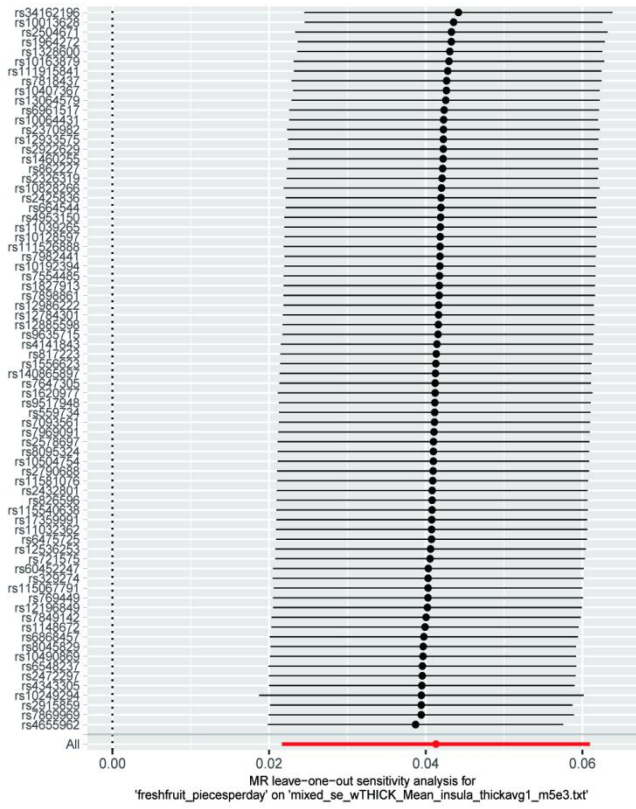

(C) milk\_typeused\_bin5

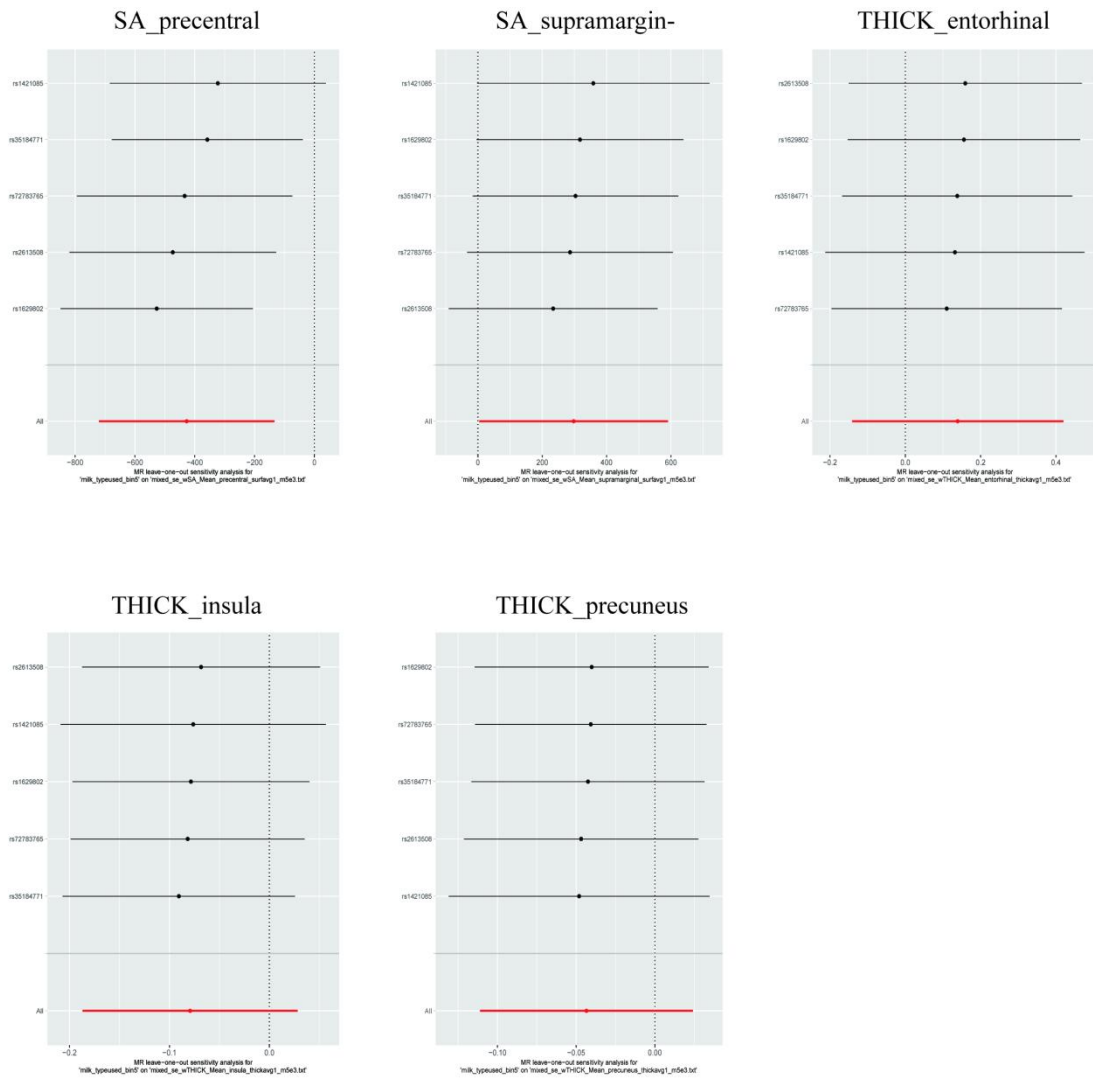

(D) milk\_typeused\_bin9

SA\_lingual

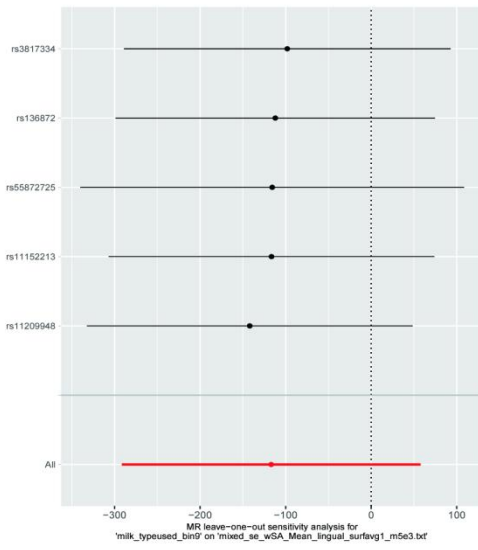

SA\_precentral

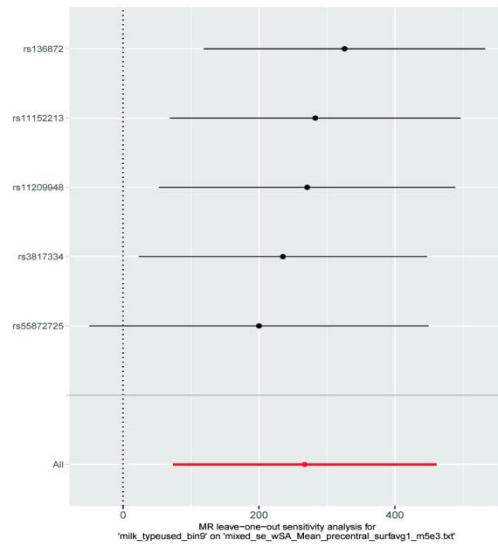

SA\_superiorfrontal

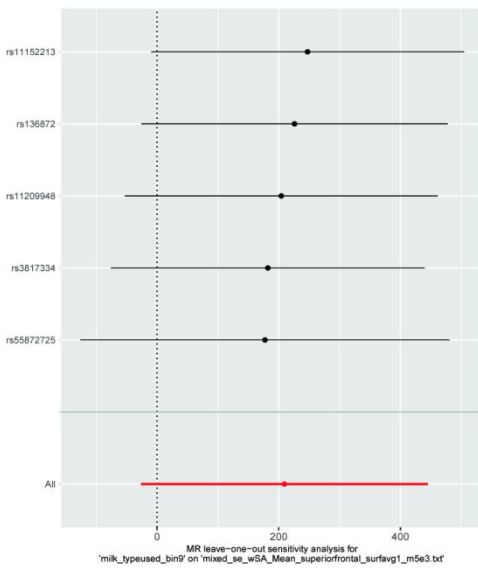

THICK\_entorhinal

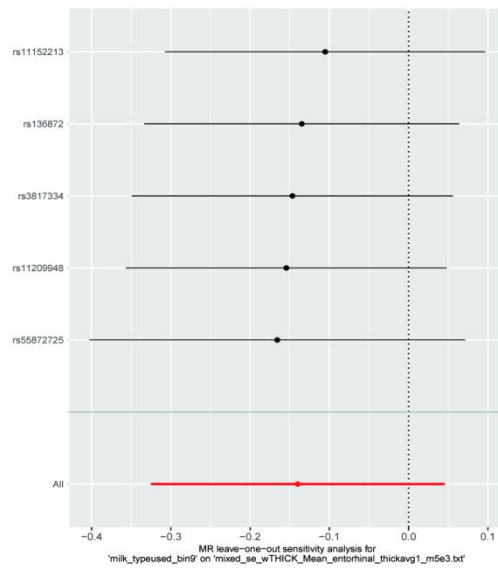

(E) Protein

### THICK\_frontalpole

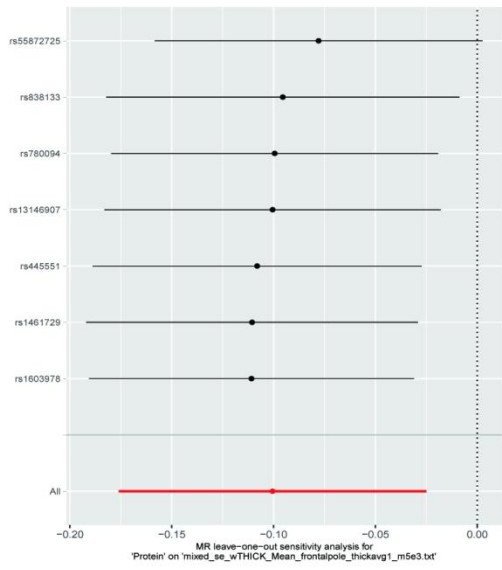

### (F) water\_glassesperday

### SA\_lateraloccipital

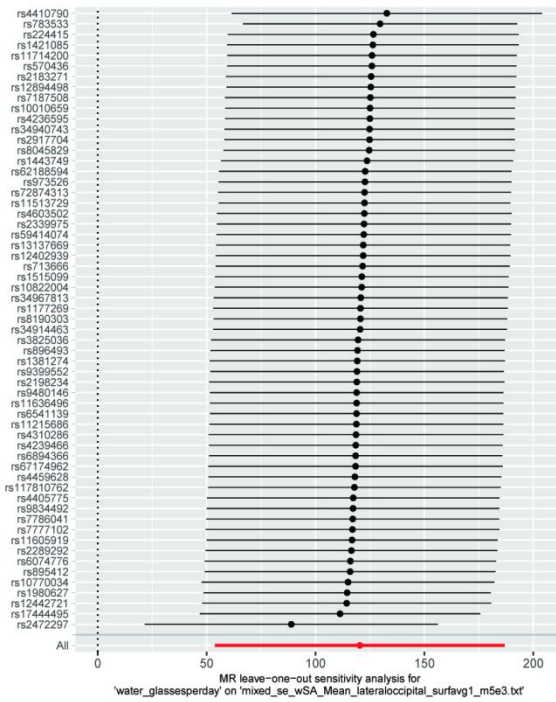

Figure 6. scatter plots of food type to cortical regions.

(A) Fat

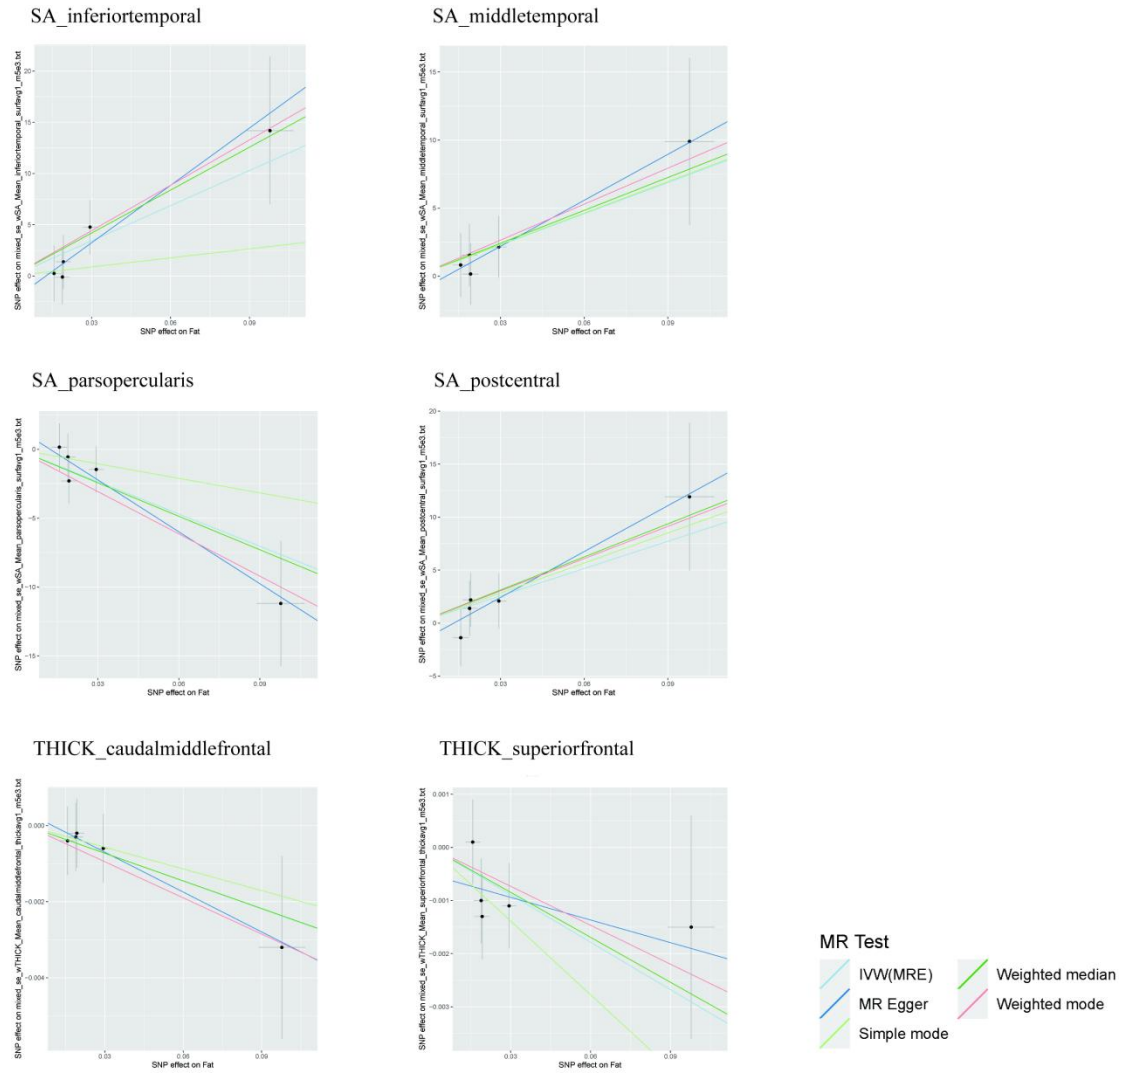

(B) freshfruit\_piecesperday

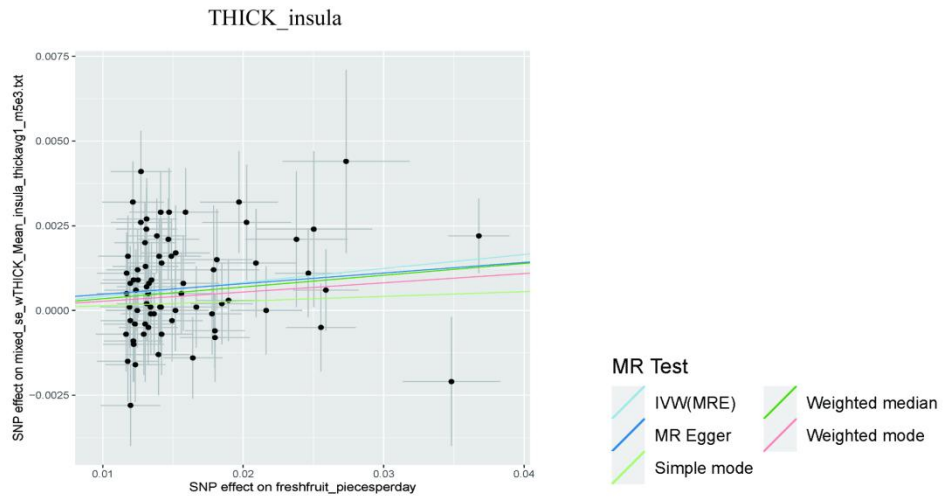

(C) milk\_typeused\_bin5

SA\_precentral

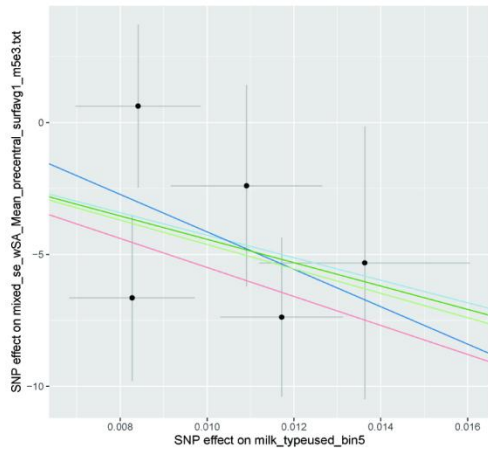

SA\_supramarginal

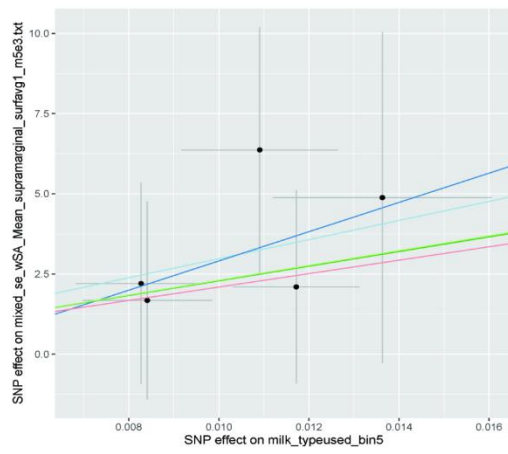

THICK\_entorhinal

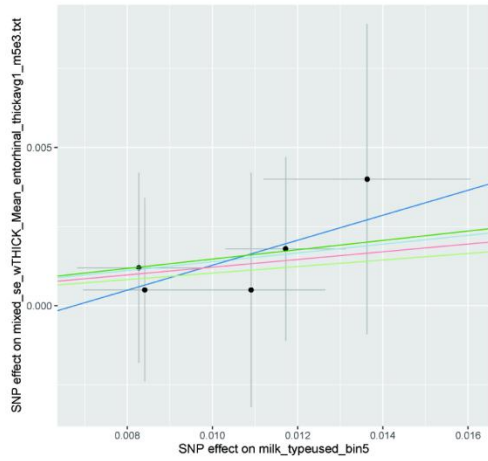

THICK\_insula

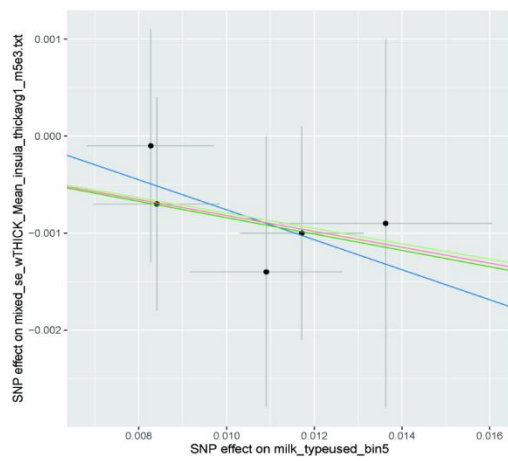

THICK\_precuneus

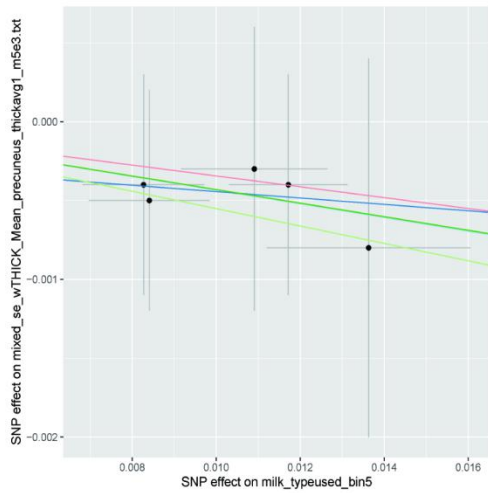

MR Test

- IVW(MRE)
- MR Egger
- Simple mode
- Weighted median
- Weighted mode

(D) milk\_typeused\_bin9



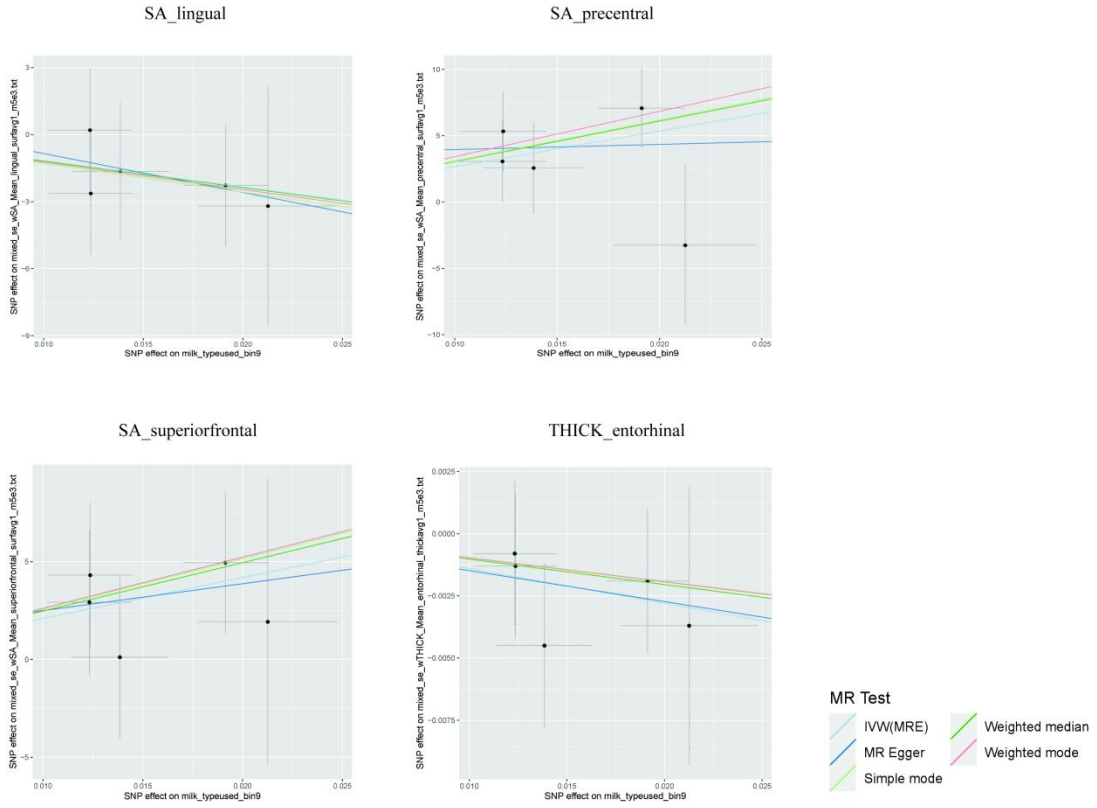

(E) Protein

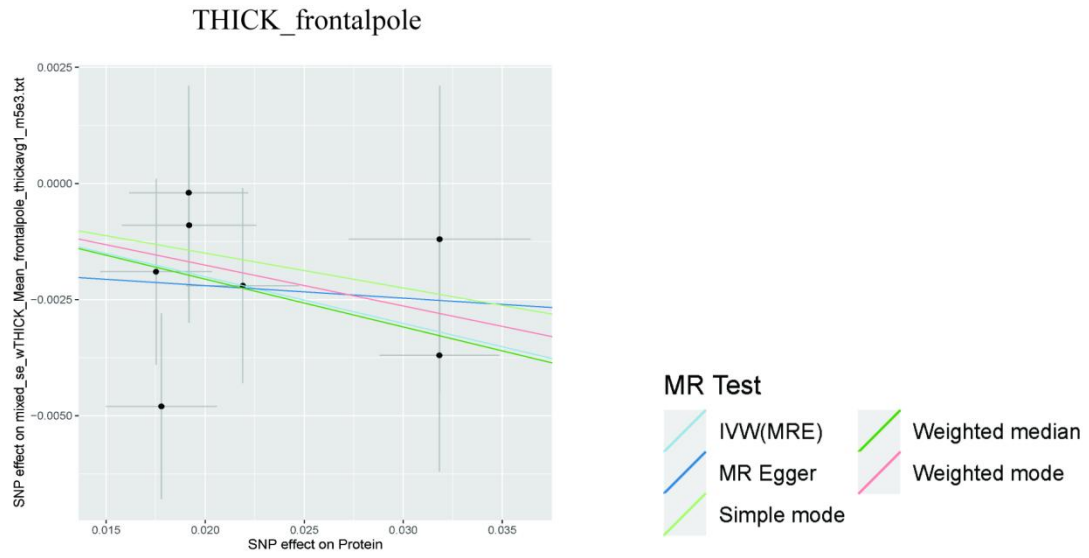

(F) water\_glassesperday

### SA\_lateraloccipital

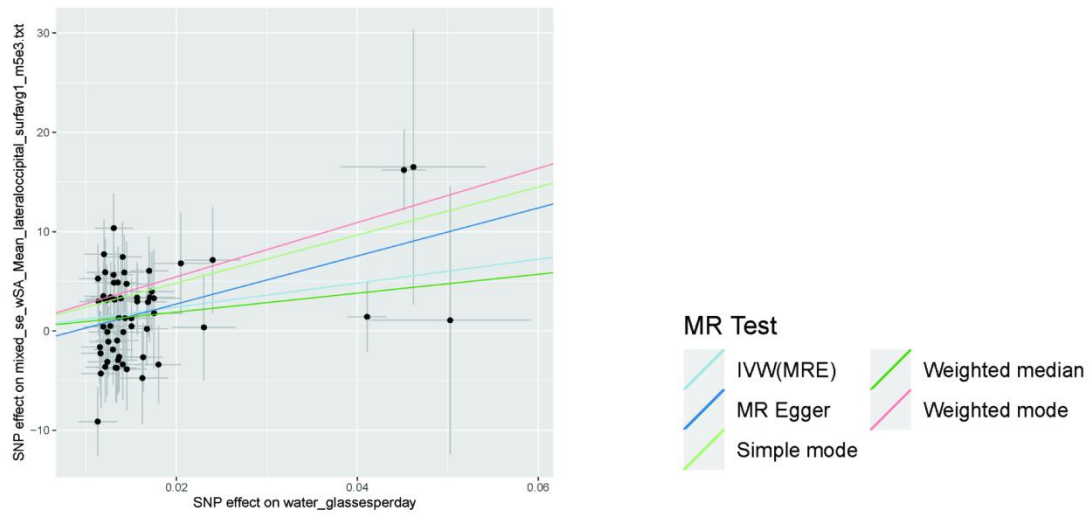

Figure7.reverse forest plots of cortical regions to food type.

### (A) SA\_medialorbitofrontal nonoilyfish\_overallfreq

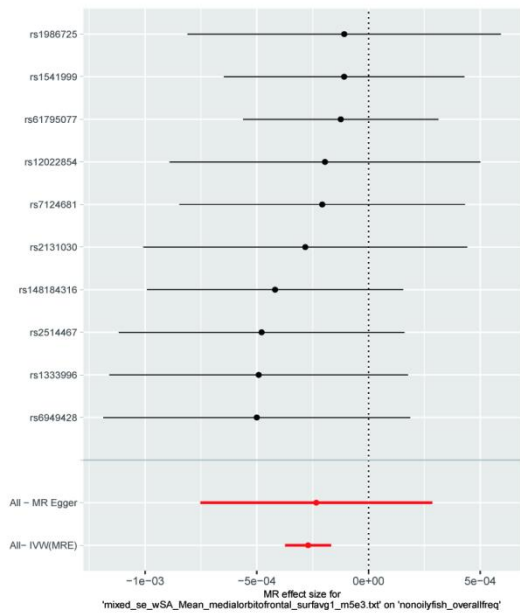

### (B) THICK\_caudalanteriorcingulate

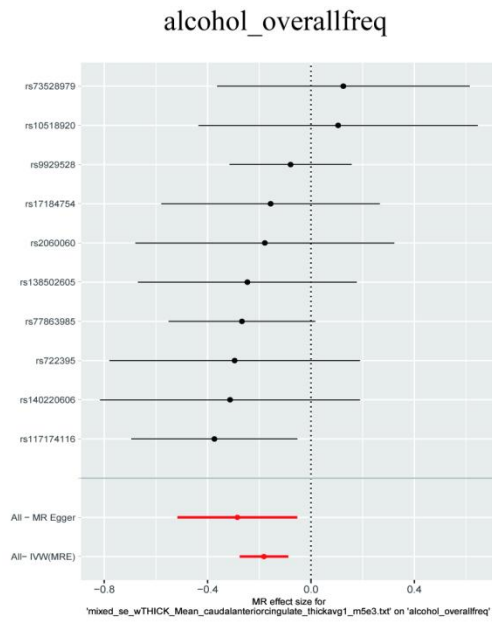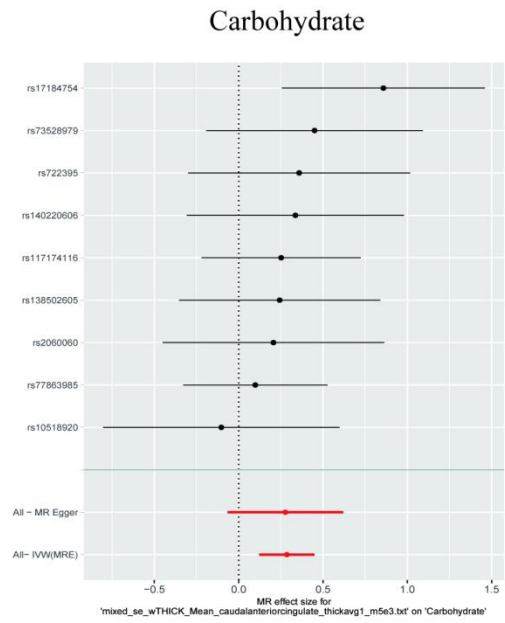

(C) THICK\_lateraloccipital  
coffee\_cupsperday

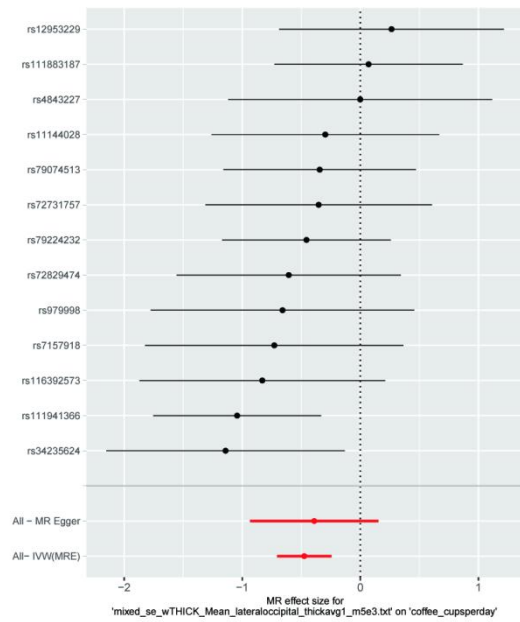

(D) THICK\_lateralorbitofrontal

### coffee\_cupsperday

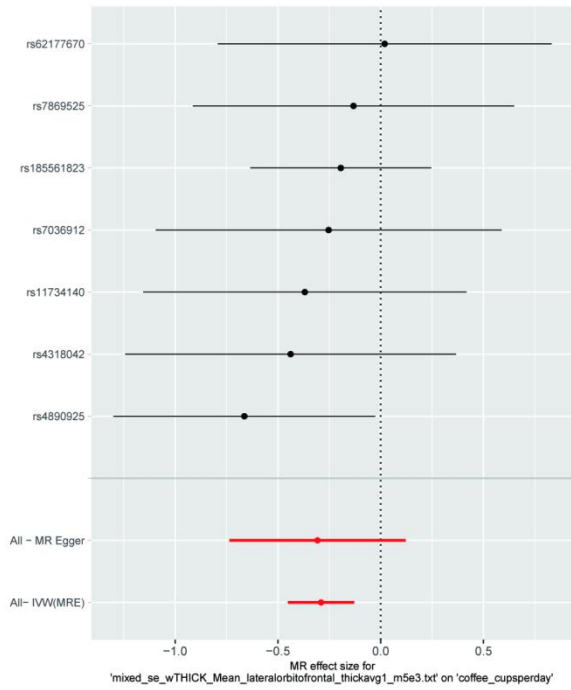

### (E) THICK\_paracentral

#### oilyfish\_overallfreq

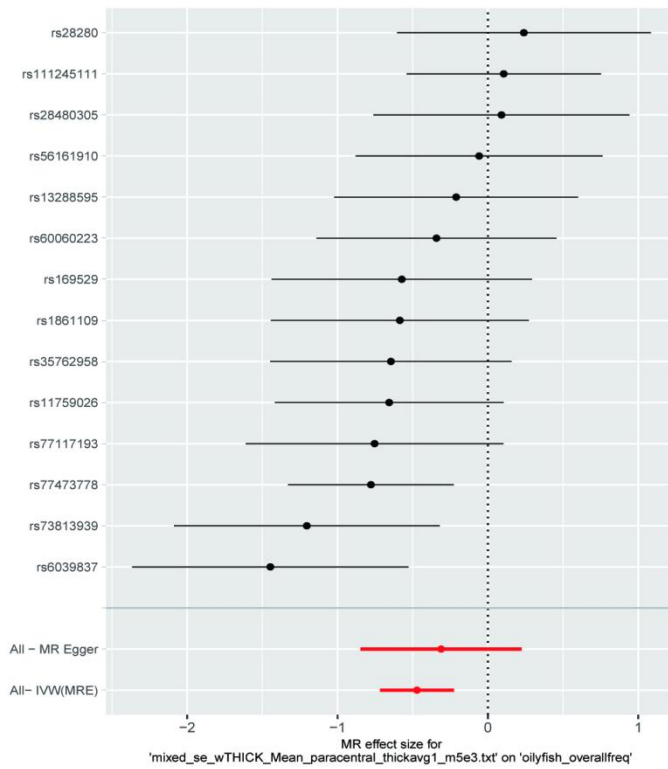

Figure 8. funnel plots of cortical regions to food type.

(A) SA\_medialorbitofrontal

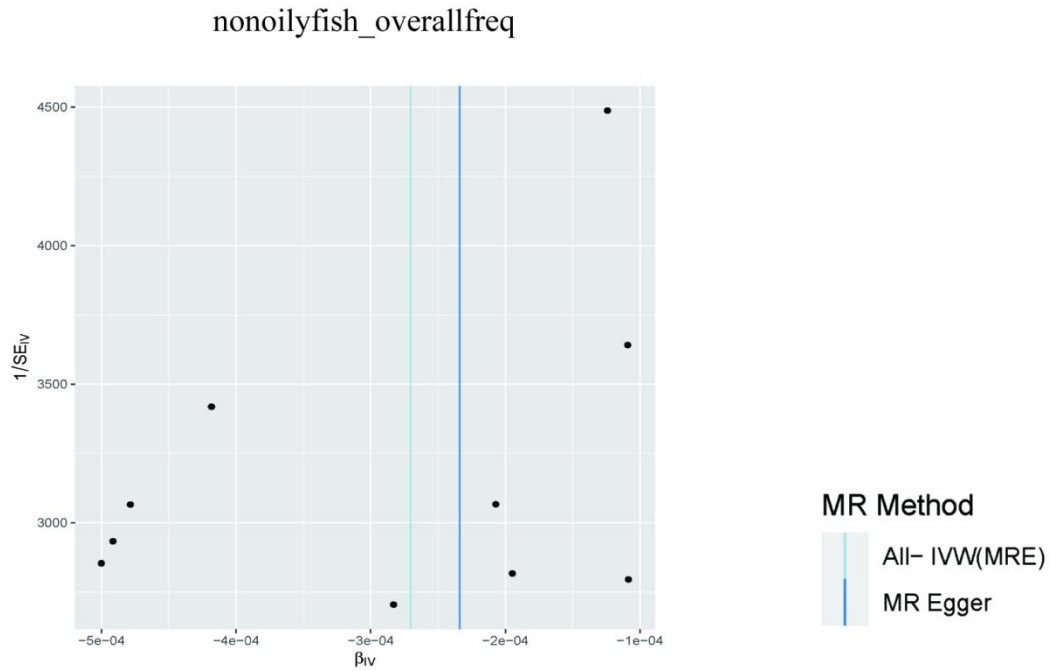

(B) THICK\_caudalanteriorcingulate

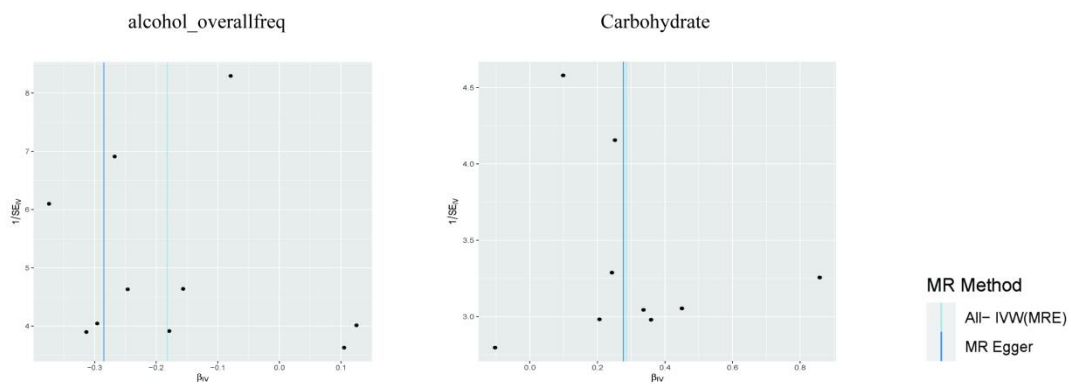

(C) THICK\_lateraloccipital

coffee\_cupsperday

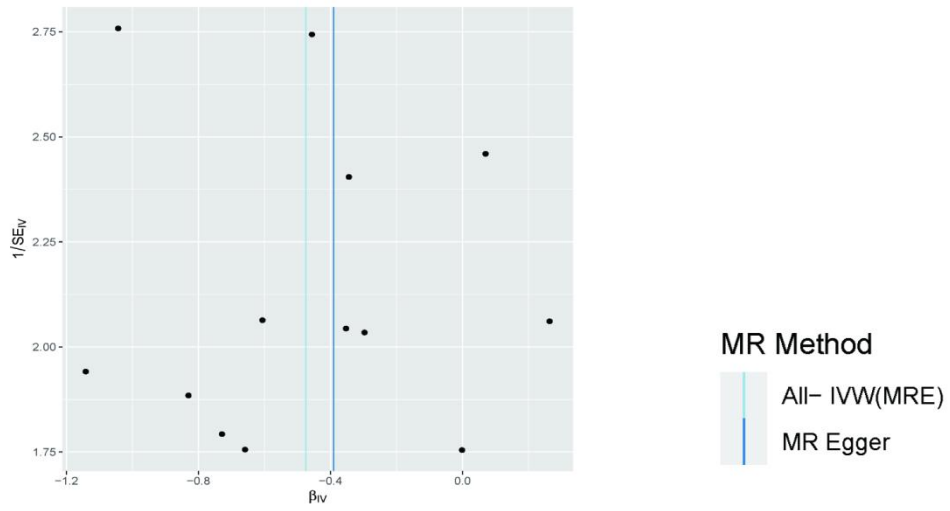

(D) THICK\_lateralorbitofrontal  
coffee\_cupsperday

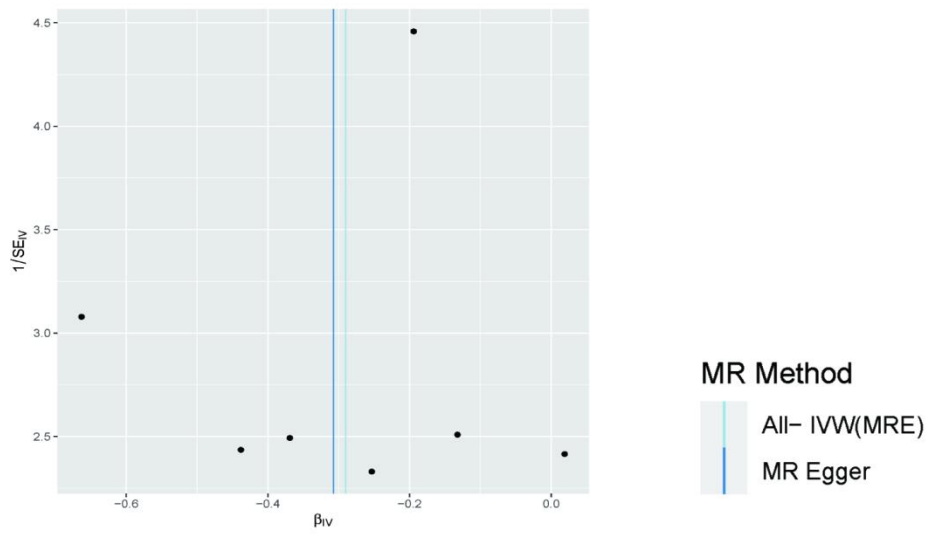

(E) THICK\_paracentral

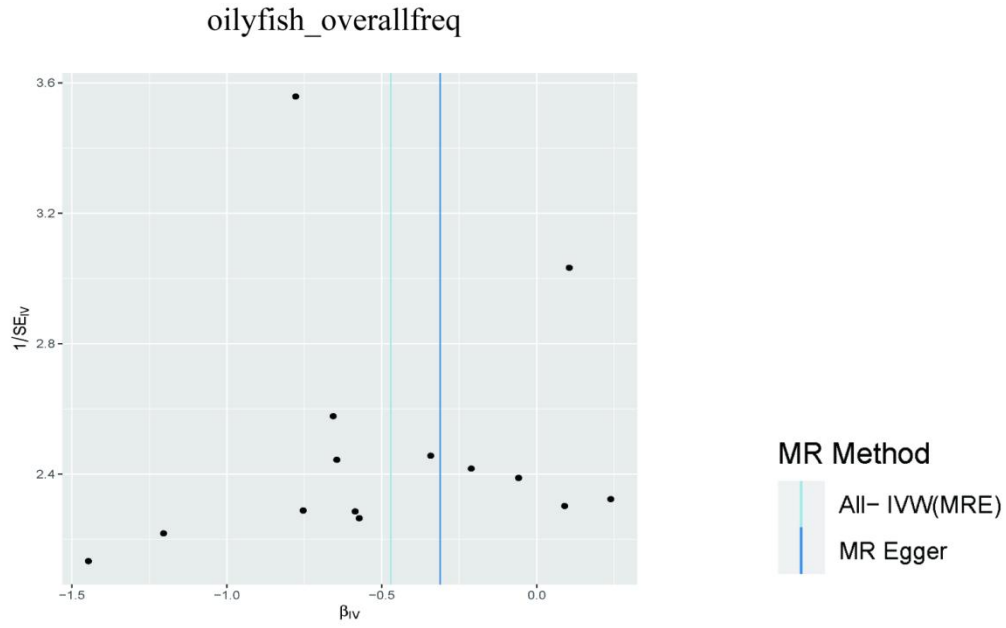

Figure9.leave-one-out plots of cortical regions to food type.  
 (A) SA\_medialorbitofrontal

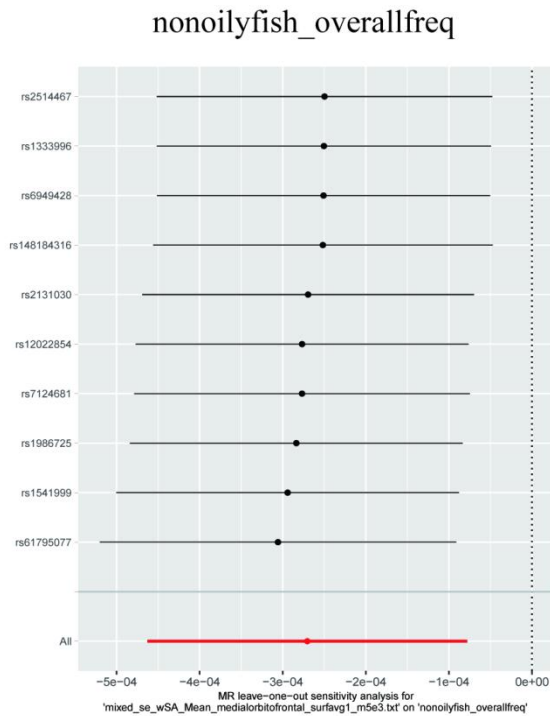

(B) THICK\_caudalanteriorcingulate  
alcohol\_overallfreq

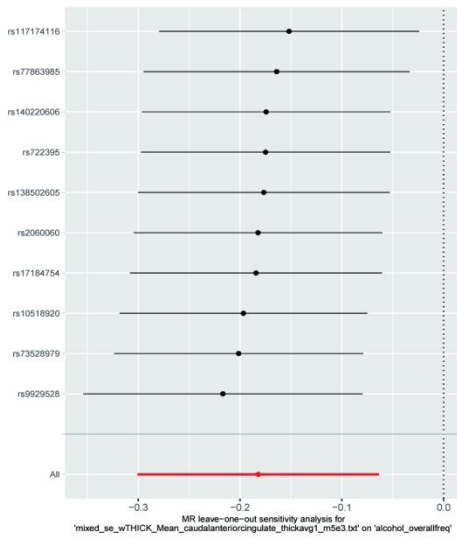

Carbohydrate

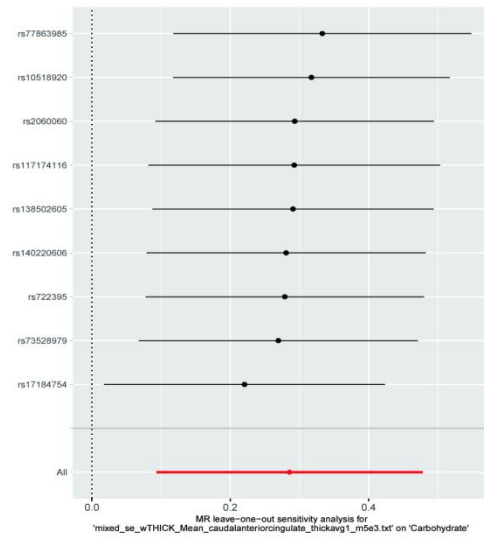

(C) THICK\_lateraloccipital  
coffee\_cupsperday

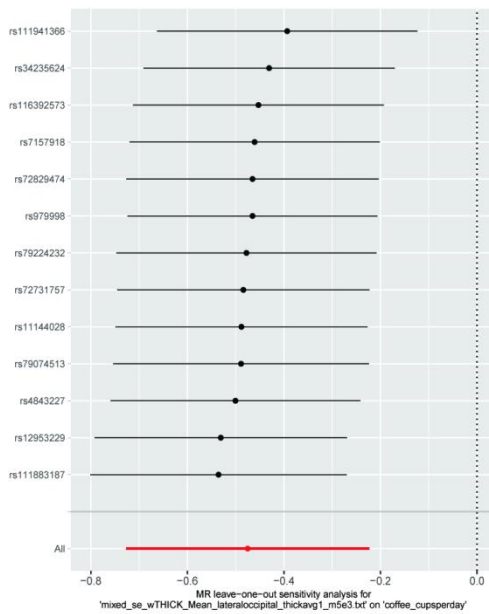

(D) THICK\_lateralorbitofrontal



### coffee\_cupsperday

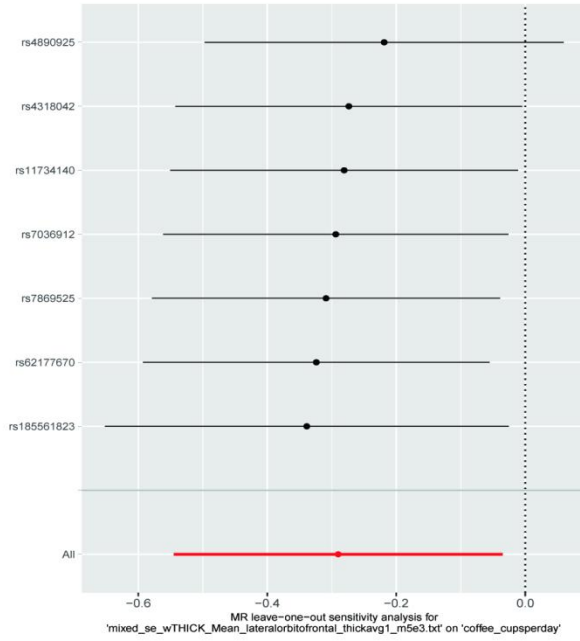

### (E) THICK\_paracentral

### oilyfish\_overallfreq

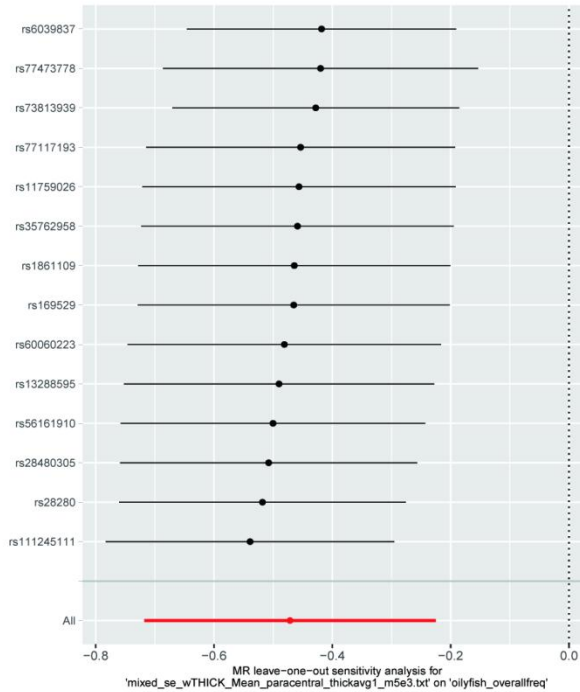

Figure 10. scatter plots of cortical regions to food type.

(A) SA\_medialorbitofrontal

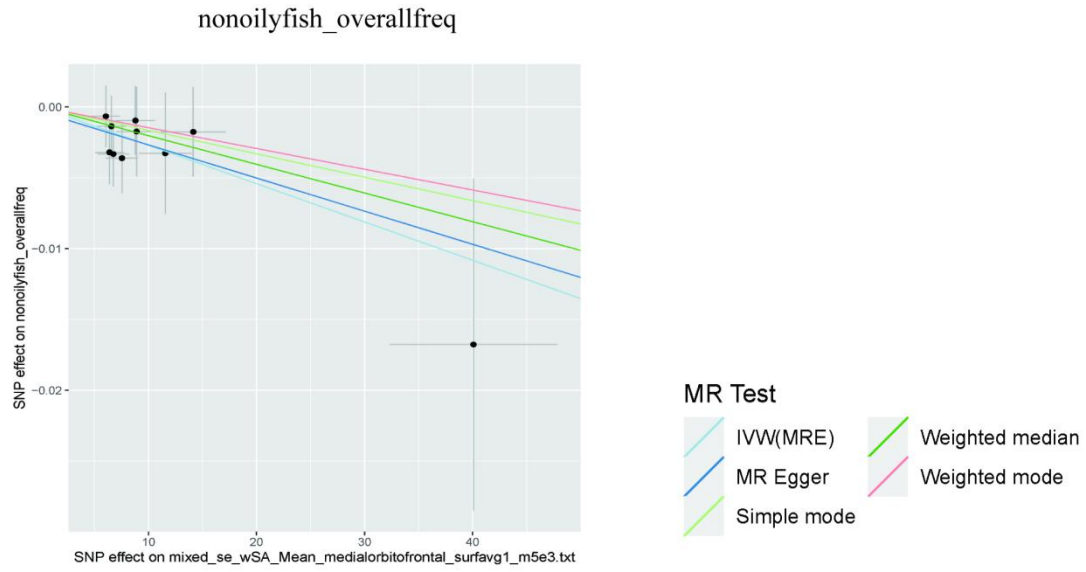

(B) THICK\_caudalanteriorcingulate

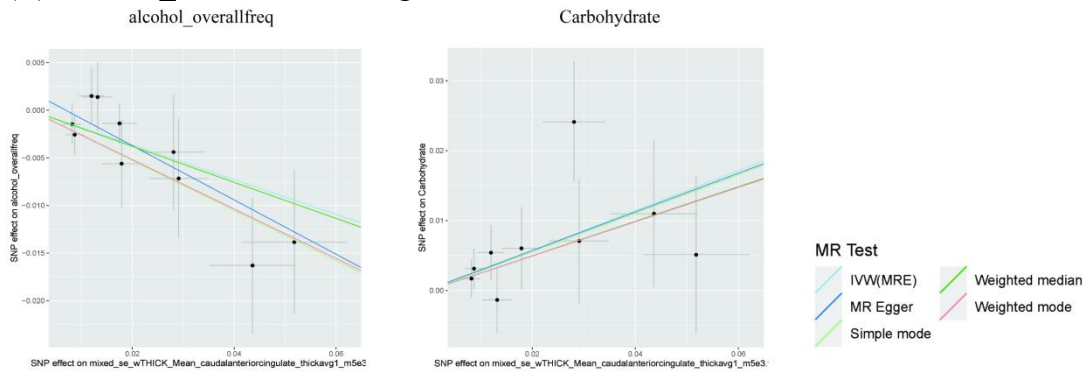

(C) THICK\_lateraloccipital

### coffee\_cupsperday

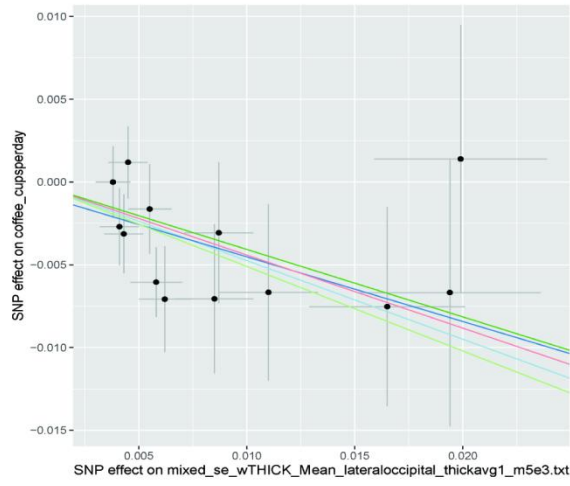

#### MR Test

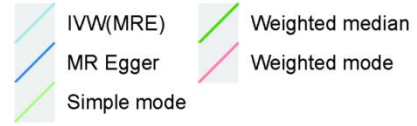

### (D) THICK\_lateralorbitofrontal coffee\_cupsperday

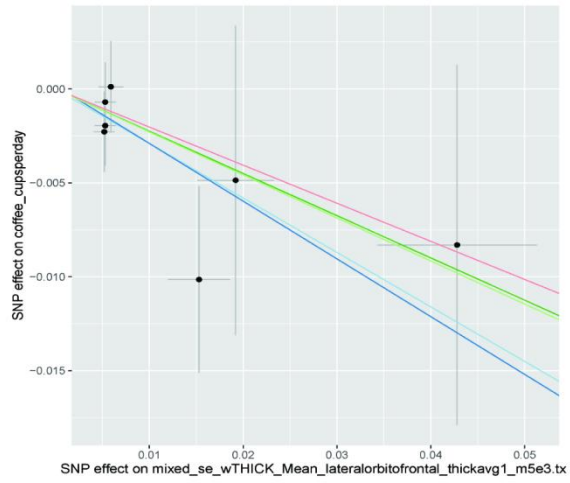

#### MR Test

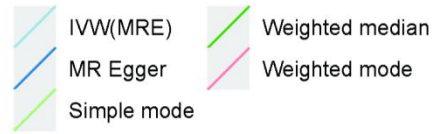

### (E) THICK\_paracentral

# oilyfish\_overallfreq

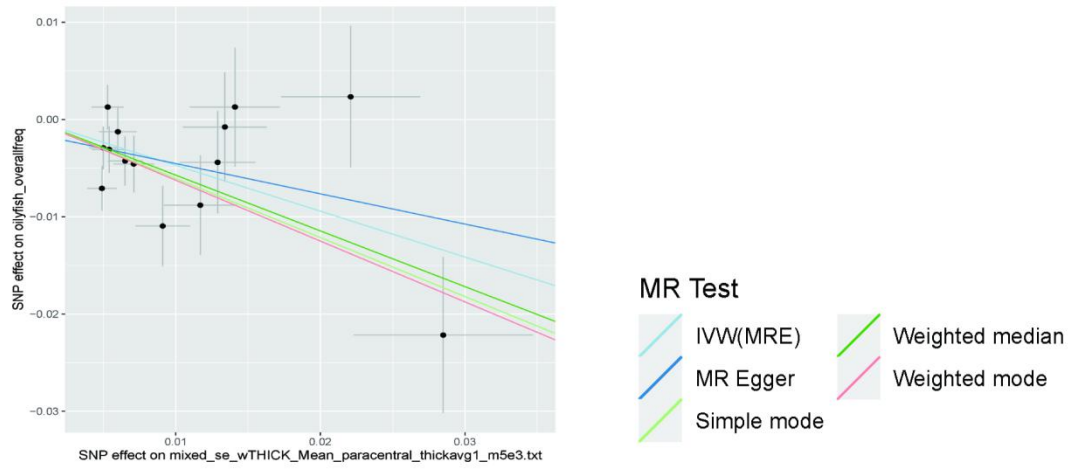

Supplement: d3fo02879h9.pdf [file d3fo02879h9.pdf]
