# Supplementary material for: Unveiling the influence of daily dietary patterns on brain cortical structure: insights from bidirectional Mendelian randomization
Source: Royal Society of Chemistry journal article supplement (doi:10.1039/d3fo02879h), 2023-01-01
Supplement: d3fo02879h2.xlsx [file d3fo02879h2.xlsx]

## Sheet: 19food
Supplementary Table 2.1 GWAS summary data of food type at P-value<5.0×10-8
Food type	rsID	effect_allele	other_allele	Beta	SE	P-value
alcohol_overallfreq	rs753790753	GTTGA	G	0.0119366	0.00216147	2.1e-08
alcohol_overallfreq	rs34712273	C	A	0.0116011	0.00212049	2.7e-08
alcohol_overallfreq	rs3128110	C	G	-0.0121865	0.00214698	8.8e-09
alcohol_overallfreq	rs3121574	A	G	-0.0121844	0.00214706	8.8e-09
alcohol_overallfreq	rs3128111	C	G	-0.0121672	0.00214831	9.7e-09
alcohol_overallfreq	1:930888_ATTTTT_A	ATTTTT	A	0.0118831	0.00216821	2.7e-08
alcohol_overallfreq	rs2710880	A	G	-0.012157	0.00214752	9.6e-09
alcohol_overallfreq	rs2799060	G	A	-0.0122572	0.00214851	7.4e-09
alcohol_overallfreq	rs9442392	G	A	0.0119573	0.00211976	1e-08
alcohol_overallfreq	rs2298214	C	A	0.0123844	0.00212609	3.4e-09
alcohol_overallfreq	rs1936360	C	T	0.0117683	0.00211917	1.8e-08
alcohol_overallfreq	rs2799056	A	G	-0.0129707	0.00213975	8.4e-10
alcohol_overallfreq	rs4503294	C	T	0.0126954	0.00211305	1e-09
alcohol_overallfreq	rs58913475	C	CA	-0.0129363	0.00214563	1.1e-09
alcohol_overallfreq	1:941137_AGCCCCCGCAGCAGT_A	AGCCCCCGCAGCAGT	A	0.0131144	0.00230084	7.1e-09
alcohol_overallfreq	rs3128116	C	T	-0.0128158	0.00214013	1.3e-09
alcohol_overallfreq	rs57683598	G	A	-0.0128288	0.00214026	1.3e-09
alcohol_overallfreq	rs9778087	C	T	-0.0129193	0.00214045	1e-09
alcohol_overallfreq	rs2465140	G	C	-0.0124605	0.0021411	3.7e-09
alcohol_overallfreq	rs13303313	C	T	0.0118348	0.00211419	1.2e-08
alcohol_overallfreq	rs3128117	T	C	-0.0125187	0.0021379	3e-09
alcohol_overallfreq	rs1921	G	A	-0.0121516	0.00213144	7.9e-09
alcohol_overallfreq	rs760452172	GAAGT	G	0.0113881	0.00210595	3.8e-08
alcohol_overallfreq	rs1891906	A	C	-0.0125861	0.00213661	2.4e-09
alcohol_overallfreq	rs9331223	T	C	0.0120289	0.00210983	6.6e-09
alcohol_overallfreq	rs9442363	C	T	0.0118834	0.0021135	1.1e-08
alcohol_overallfreq	rs9442388	C	T	0.0119193	0.00211374	9.5e-09
alcohol_overallfreq	rs575235313	A	ATT	-0.0127018	0.00214106	1.9e-09
alcohol_overallfreq	rs2465141	A	G	-0.0125919	0.00213868	2.5e-09
alcohol_overallfreq	rs3128118	G	A	-0.0124633	0.00214133	3.9e-09
alcohol_overallfreq	rs9442611	G	A	0.0113901	0.00210597	3.8e-08
alcohol_overallfreq	rs59239970	A	AT	-0.0131614	0.00215999	7.1e-10
alcohol_overallfreq	rs4970393	G	A	0.0116352	0.00211009	2.3e-08
alcohol_overallfreq	rs4970394	C	T	0.012125	0.00211189	6.1e-09
alcohol_overallfreq	rs71576588	A	G	0.0114991	0.00212956	4.5e-08
alcohol_overallfreq	1:966391_ATG_A	ATG	A	0.0116343	0.00211142	2.3e-08
alcohol_overallfreq	rs9442364	G	C	0.0117278	0.00210939	1.7e-08
alcohol_overallfreq	rs4970350	G	A	0.0117473	0.00211105	1.7e-08
alcohol_overallfreq	rs9442391	T	C	0.0115382	0.00211992	3.6e-08
alcohol_overallfreq	rs2275813	C	T	0.0117589	0.00212779	2.4e-08
alcohol_overallfreq	rs780569	T	A	0.0142432	0.00231521	1.2e-09
alcohol_overallfreq	rs1762825	T	A	0.0140961	0.00231693	1.9e-09
alcohol_overallfreq	rs4480324	A	G	0.0138702	0.00231058	3e-09
alcohol_overallfreq	rs56048523	A	T	0.013872	0.00254332	2e-08
alcohol_overallfreq	rs7514579	A	C	0.0141805	0.00247542	5e-09
alcohol_overallfreq	rs201663612	A	T	0.0119333	0.0022194	4.9e-08
alcohol_overallfreq	rs36110588	A	AG	0.0121528	0.00224156	4.9e-08
alcohol_overallfreq	rs2244598	T	C	-0.0125451	0.00214683	3.5e-09
alcohol_overallfreq	rs139471180	T	TCACACACACACA	-0.0126798	0.00221236	1.5e-08
alcohol_overallfreq	1:216695787_ACTT_A	ACTT	A	-0.0126624	0.00230346	3.9e-08
alcohol_overallfreq	rs763783009	AAATAACATTTTTATC	A	-0.012829	0.00231876	3.3e-08
alcohol_overallfreq	rs12135662	G	A	-0.0125853	0.00230192	4.9e-08
alcohol_overallfreq	rs960813	G	C	-0.0158064	0.00285536	4.7e-08
alcohol_overallfreq	rs72769216	T	A	-0.0158133	0.00285538	4.6e-08
alcohol_overallfreq	rs77082783	A	G	-0.0158634	0.00285659	4.3e-08
alcohol_overallfreq	rs17039365	T	C	-0.0158633	0.00285658	4.3e-08
alcohol_overallfreq	rs72769218	G	T	-0.0158097	0.0028554	4.7e-08
alcohol_overallfreq	rs12474706	T	A	-0.0158548	0.00285659	4.4e-08
alcohol_overallfreq	rs10495483	G	C	-0.0158604	0.00285658	4.3e-08
alcohol_overallfreq	rs12474807	A	G	-0.0158604	0.00285658	4.3e-08
alcohol_overallfreq	rs7596980	C	T	-0.0158124	0.00285538	4.6e-08
alcohol_overallfreq	rs7559324	T	G	-0.0158129	0.00285538	4.6e-08
alcohol_overallfreq	rs7607185	G	A	-0.0158611	0.00285657	4.3e-08
alcohol_overallfreq	rs11127375	T	G	-0.0158623	0.00285655	4.3e-08
alcohol_overallfreq	rs11676685	C	G	-0.0158628	0.00285654	4.3e-08
alcohol_overallfreq	rs12467544	G	A	-0.0158617	0.00285652	4.3e-08
alcohol_overallfreq	rs11683093	A	G	-0.0158792	0.00285671	4.1e-08
alcohol_overallfreq	rs1990856	G	C	-0.0158785	0.00285671	4.2e-08
alcohol_overallfreq	rs6751879	A	G	-0.0158713	0.00285532	4.1e-08
alcohol_overallfreq	rs72769225	T	C	-0.0159003	0.00285611	3.9e-08
alcohol_overallfreq	rs12468168	C	T	-0.0158105	0.00285364	4.6e-08
alcohol_overallfreq	rs34306671	G	GT	-0.0157969	0.00285483	4.8e-08
alcohol_overallfreq	rs376122867	CAA	C	-0.015979	0.00286111	3.5e-08
alcohol_overallfreq	rs60276756	A	G	-0.0158753	0.00285769	4.3e-08
alcohol_overallfreq	rs1582415	T	G	-0.0160917	0.00286864	3e-08
alcohol_overallfreq	rs1582414	G	T	-0.0160911	0.00286863	3e-08
alcohol_overallfreq	rs58275964	C	T	-0.0160954	0.00286864	3e-08
alcohol_overallfreq	rs12478611	G	A	-0.0160627	0.00287389	3.4e-08
alcohol_overallfreq	rs10865534	A	T	-0.016067	0.00287398	3.3e-08
alcohol_overallfreq	rs1592732	C	G	-0.0160796	0.00286552	2.9e-08
alcohol_overallfreq	rs61688379	T	C	-0.0160971	0.00286679	2.8e-08
alcohol_overallfreq	rs72769228	T	G	-0.016052	0.00287581	3.5e-08
alcohol_overallfreq	rs72769229	A	T	-0.0161182	0.00287931	3.2e-08
alcohol_overallfreq	rs7420242	G	A	-0.0162183	0.00289577	3.1e-08
alcohol_overallfreq	rs3795936	A	C	0.0156	0.00256518	1.2e-09
alcohol_overallfreq	rs66983662	A	G	0.0155308	0.0025656	1.4e-09
alcohol_overallfreq	rs66523860	A	G	0.0157349	0.00256622	8.8e-10
alcohol_overallfreq	rs4665627	T	C	-0.0118314	0.00215502	3.5e-08
alcohol_overallfreq	rs1078345	A	G	0.015754	0.00255971	6.5e-10
alcohol_overallfreq	rs1862901	T	C	-0.0135522	0.0022632	1.3e-09
alcohol_overallfreq	rs1991083	C	T	-0.0142933	0.00224301	1.1e-10
alcohol_overallfreq	rs6733007	C	T	-0.0144457	0.00223116	7.2e-11
alcohol_overallfreq	rs7586023	C	G	-0.0145694	0.00223511	5.3e-11
alcohol_overallfreq	rs1007194	G	C	-0.0121068	0.00209665	8e-09
alcohol_overallfreq	rs11125160	G	A	-0.0140747	0.00222734	1.5e-10
alcohol_overallfreq	rs115667927	C	T	0.029849	0.00547163	4.9e-08
alcohol_overallfreq	rs7588944	C	T	-0.013108	0.00221127	2.2e-09
alcohol_overallfreq	rs55836224	T	C	0.0148722	0.0025786	6.8e-09
alcohol_overallfreq	rs147281582	C	A	0.0302792	0.0054831	3.3e-08
alcohol_overallfreq	rs12713004	A	G	-0.013511	0.00233596	4.1e-09
alcohol_overallfreq	2:23896733_CCCA_C	CCCA	C	-0.013544	0.00225155	1.1e-09
alcohol_overallfreq	rs115328233	T	C	0.0302372	0.00548856	3.6e-08
alcohol_overallfreq	rs889862	C	T	-0.0135544	0.00221287	6.3e-10
alcohol_overallfreq	rs114529906	A	G	0.0303405	0.00548902	3.2e-08
alcohol_overallfreq	rs12233033	T	G	-0.0118012	0.00213678	2.7e-08
alcohol_overallfreq	rs11125163	T	C	-0.0115164	0.00209454	3.2e-08
alcohol_overallfreq	rs6713865	A	G	0.0147024	0.00269333	3.5e-08
alcohol_overallfreq	rs6713979	A	G	0.0146997	0.0026935	3.5e-08
alcohol_overallfreq	rs6714016	A	G	0.0147228	0.00269355	3.3e-08
alcohol_overallfreq	rs115262962	G	A	0.0303567	0.00548691	3.1e-08
alcohol_overallfreq	rs55987381	T	C	0.0147918	0.00269559	3e-08
alcohol_overallfreq	rs72796106	A	C	0.0160933	0.00278929	6.2e-09
alcohol_overallfreq	rs142226013	G	A	0.0303787	0.00548514	3e-08
alcohol_overallfreq	2:23902129_GCAGTTTGGACTA_G	GCAGTTTGGACTA	G	0.0317397	0.00566895	2.2e-08
alcohol_overallfreq	rs77669541	T	C	0.029989	0.00548205	4.5e-08
alcohol_overallfreq	rs114187477	A	C	0.0300356	0.00549075	4.4e-08
alcohol_overallfreq	rs149446835	G	A	0.0301437	0.00550602	4.4e-08
alcohol_overallfreq	rs146831114	C	T	0.0310212	0.00561077	3e-08
alcohol_overallfreq	rs150277855	G	C	0.0293142	0.00534422	3.8e-08
alcohol_overallfreq	rs138642449	C	T	0.0301564	0.00548921	3.9e-08
alcohol_overallfreq	rs12105433	G	A	0.030014	0.00548804	4.6e-08
alcohol_overallfreq	rs149501929	C	T	0.0301953	0.00549124	3.8e-08
alcohol_overallfreq	rs140023143	A	G	0.0303208	0.00548705	3.2e-08
alcohol_overallfreq	rs751313	G	T	0.0302643	0.00549113	3.6e-08
alcohol_overallfreq	rs751314	G	C	0.0301034	0.00549186	4.2e-08
alcohol_overallfreq	rs115763875	C	T	0.0300996	0.00549491	4.3e-08
alcohol_overallfreq	rs114689407	C	T	0.0300678	0.00549506	4.5e-08
alcohol_overallfreq	rs114129185	C	T	0.0300679	0.00549722	4.6e-08
alcohol_overallfreq	rs2551347	C	T	-0.0134685	0.00239311	1.3e-08
alcohol_overallfreq	2:23919839_CG_C	CG	C	0.0300463	0.00549957	4.9e-08
alcohol_overallfreq	rs2042481	C	T	-0.011537	0.00212118	4.6e-08
alcohol_overallfreq	rs9636434	A	G	-0.0116067	0.0021149	3.6e-08
alcohol_overallfreq	2:24030829_AAT_A	AAT	A	0.015555	0.00280617	2.1e-08
alcohol_overallfreq	2:24093078_GA_G	GA	G	-0.012531	0.00218178	7.9e-09
alcohol_overallfreq	rs11389544	C	CA	-0.011868	0.00214952	3.2e-08
alcohol_overallfreq	rs12463543	G	A	-0.0116038	0.00212146	3.8e-08
alcohol_overallfreq	rs35598160	G	A	-0.0115298	0.00212088	4.6e-08
alcohol_overallfreq	rs17711796	C	T	-0.0116303	0.00212108	3.5e-08
alcohol_overallfreq	rs35206932	C	T	-0.0124756	0.00217738	7.9e-09
alcohol_overallfreq	rs13028272	C	T	-0.011531	0.00212123	4.6e-08
alcohol_overallfreq	rs147968741	A	AAG	-0.0116859	0.00214445	4.3e-08
alcohol_overallfreq	rs113865608	GAA	G	-0.0118076	0.0021374	3e-08
alcohol_overallfreq	rs1516428	C	T	-0.0117018	0.00212235	2.9e-08
alcohol_overallfreq	rs10432638	C	A	-0.0120757	0.00216571	2e-08
alcohol_overallfreq	rs6714780	G	A	0.025817	0.00468354	3.3e-08
alcohol_overallfreq	rs72810784	T	C	0.0120916	0.00209265	1e-08
alcohol_overallfreq	rs34730887	G	A	0.011816	0.00208689	2e-08
alcohol_overallfreq	rs6720602	G	A	0.0117596	0.00208713	2.3e-08
alcohol_overallfreq	rs35784342	C	T	0.0117755	0.0020845	2.1e-08
alcohol_overallfreq	rs1659684	C	T	-0.0132454	0.0023345	1.5e-08
alcohol_overallfreq	rs2580757	T	C	-0.0121779	0.00210505	1e-08
alcohol_overallfreq	rs7596471	A	C	0.0127837	0.00223154	1.4e-08
alcohol_overallfreq	rs1275539	T	C	0.0136841	0.00225829	2e-09
alcohol_overallfreq	rs2384575	T	C	-0.0149138	0.00230968	2e-10
alcohol_overallfreq	rs1275541	A	G	0.0155357	0.0022815	2e-11
alcohol_overallfreq	2:27389951_CA_C	CA	C	0.0158202	0.00229111	1e-11
alcohol_overallfreq	2:27391678_CA_C	CA	C	-0.0158032	0.00230923	1.6e-11
alcohol_overallfreq	rs1659689	A	G	0.0156116	0.00227817	1.5e-11
alcohol_overallfreq	rs2580754	T	A	0.0157176	0.00227255	9.5e-12
alcohol_overallfreq	rs1659676	C	T	0.0157623	0.00227111	8.1e-12
alcohol_overallfreq	rs1821986	A	G	0.0154359	0.00228668	3.3e-11
alcohol_overallfreq	rs1659695	T	A	0.0154311	0.0022859	3.4e-11
alcohol_overallfreq	rs1659696	G	A	0.0153845	0.00228614	3.8e-11
alcohol_overallfreq	2:27408202_CT_C	CT	C	0.0153905	0.00228617	3.8e-11
alcohol_overallfreq	rs2439074	T	A	0.0154203	0.0022857	3.4e-11
alcohol_overallfreq	rs1659699	A	G	0.0153392	0.00228646	4.3e-11
alcohol_overallfreq	2:27414851_CA_C	CA	C	-0.0153784	0.00230291	5.2e-11
alcohol_overallfreq	rs1659701	T	C	0.0153	0.00228667	4.9e-11
alcohol_overallfreq	rs1275504	A	T	0.0149919	0.00227801	1e-10
alcohol_overallfreq	rs60555785	G	A	0.0152499	0.00228685	5.8e-11
alcohol_overallfreq	2:27417267_GATC_G	GATC	G	0.0153332	0.00228944	4.8e-11
alcohol_overallfreq	rs1275501	T	G	0.0152607	0.00228666	5.6e-11
alcohol_overallfreq	rs1659685	C	T	0.0152939	0.00228606	5e-11
alcohol_overallfreq	rs1395	G	A	0.0155293	0.00226285	1.6e-11
alcohol_overallfreq	rs1275522	C	T	0.0152866	0.00228616	5.1e-11
alcohol_overallfreq	rs1275528	A	G	0.0152918	0.00228673	5.1e-11
alcohol_overallfreq	rs1275530	A	G	0.015322	0.00228691	4.7e-11
alcohol_overallfreq	rs11608	G	A	0.014804	0.00228231	1.8e-10
alcohol_overallfreq	rs1275535	C	T	0.015409	0.00228683	3.7e-11
alcohol_overallfreq	2:27437820_AT_A	AT	A	0.0152012	0.00228686	6.7e-11
alcohol_overallfreq	2:27440013_CT_C	CT	C	0.0152534	0.00228712	5.9e-11
alcohol_overallfreq	rs1275537	C	G	0.0154048	0.00228684	3.7e-11
alcohol_overallfreq	rs1275538	A	G	0.0154272	0.00228683	3.5e-11
alcohol_overallfreq	rs4665958	A	G	-0.0153187	0.00228678	4.8e-11
alcohol_overallfreq	rs71441063	T	C	0.0237618	0.00428351	4.6e-08
alcohol_overallfreq	rs9309604	T	C	-0.0153293	0.0022868	4.7e-11
alcohol_overallfreq	rs7593448	C	G	-0.0153653	0.00228688	4.2e-11
alcohol_overallfreq	rs3769143	G	A	-0.0153558	0.00228701	4.4e-11
alcohol_overallfreq	rs56364136	T	C	-0.0153778	0.0022869	4.1e-11
alcohol_overallfreq	rs6717980	T	C	-0.0154052	0.00228694	3.8e-11
alcohol_overallfreq	rs1141313	A	G	-0.0153899	0.00228784	4e-11
alcohol_overallfreq	rs2014252	T	A	-0.0154085	0.00228754	3.8e-11
alcohol_overallfreq	rs13408252	C	A	-0.0148845	0.00247588	4.4e-09
alcohol_overallfreq	rs10622772	A	ACT	-0.0153109	0.00228699	5e-11
alcohol_overallfreq	rs1561535	C	T	-0.0157197	0.00230005	1.7e-11
alcohol_overallfreq	rs10187781	T	C	-0.0156449	0.00229913	2.1e-11
alcohol_overallfreq	rs11693052	A	G	-0.0152133	0.00228543	6.7e-11
alcohol_overallfreq	rs113407226	G	A	0.0222437	0.00344892	1.3e-10
alcohol_overallfreq	rs6547521	G	C	-0.0153257	0.00228819	4.9e-11
alcohol_overallfreq	rs72817536	A	G	-0.0145928	0.00257693	3.5e-08
alcohol_overallfreq	rs60631624	T	G	-0.0145818	0.00256453	3.1e-08
alcohol_overallfreq	2:27498734_ACCCCCG_A	ACCCCCG	A	-0.0167727	0.00225274	1.7e-13
alcohol_overallfreq	rs62130707	A	G	-0.0154461	0.00251131	2.2e-09
alcohol_overallfreq	rs530941782	CGTTTGTTTGTTT	C	-0.0144613	0.00256474	4e-08
alcohol_overallfreq	rs4665961	T	C	-0.017334	0.00237777	1.1e-12
alcohol_overallfreq	rs11126950	A	G	-0.0144879	0.00256389	3.7e-08
alcohol_overallfreq	rs1992291	A	G	-0.01525	0.00251171	3.5e-09
alcohol_overallfreq	rs62130709	C	T	-0.0144484	0.00256348	4e-08
alcohol_overallfreq	rs149996558	A	G	-0.0174158	0.00255166	1.9e-11
alcohol_overallfreq	rs11686131	C	T	-0.0144828	0.00256443	3.8e-08
alcohol_overallfreq	rs4665376	T	C	-0.0172921	0.00237751	1.2e-12
alcohol_overallfreq	rs9710901	T	G	-0.0144946	0.00256433	3.6e-08
alcohol_overallfreq	rs12053390	A	G	-0.0144368	0.00256376	4.1e-08
alcohol_overallfreq	rs4665962	A	G	-0.0144889	0.00256429	3.7e-08
alcohol_overallfreq	rs11898114	C	T	-0.0172822	0.00237744	1.2e-12
alcohol_overallfreq	rs62130711	A	G	-0.0151121	0.00251102	4.8e-09
alcohol_overallfreq	rs13404327	G	T	-0.017305	0.00237786	1.2e-12
alcohol_overallfreq	rs13404446	G	A	-0.0172603	0.00237734	1.3e-12
alcohol_overallfreq	rs4665377	G	T	-0.0172418	0.00253038	2.9e-11
alcohol_overallfreq	rs6760868	A	G	-0.0167324	0.00239315	8.2e-12
alcohol_overallfreq	rs6716850	G	A	-0.0167994	0.0023937	7e-12
alcohol_overallfreq	rs72860013	T	G	-0.0130269	0.00229971	3.5e-08
alcohol_overallfreq	rs142346138	A	T	0.0249354	0.00441083	2.5e-08
alcohol_overallfreq	rs7575245	G	A	-0.0163876	0.00239813	2.4e-11
alcohol_overallfreq	rs4665963	T	C	-0.0171597	0.0023785	1.8e-12
alcohol_overallfreq	rs62130714	A	G	-0.0144485	0.00256438	4e-08
alcohol_overallfreq	rs4665965	T	C	-0.0171489	0.00238332	2e-12
alcohol_overallfreq	rs4665966	C	G	-0.0170965	0.00238428	2.3e-12
alcohol_overallfreq	rs4665378	A	C	-0.0192867	0.00212621	2.8e-19
alcohol_overallfreq	rs113469548	CA	C	-0.0192761	0.00213237	3.9e-19
alcohol_overallfreq	rs1049817	A	G	-0.0192171	0.0021246	3.6e-19
alcohol_overallfreq	rs3739095	G	A	-0.0216805	0.00209855	1.5e-24
alcohol_overallfreq	rs11684134	A	G	-0.0189221	0.00213604	1.7e-18
alcohol_overallfreq	rs11689803	T	A	-0.0169338	0.00231559	3.2e-13
alcohol_overallfreq	rs556013357	A	AT	-0.0178056	0.00223457	2.5e-15
alcohol_overallfreq	rs11126975	T	C	-0.0191839	0.00212763	4.6e-19
alcohol_overallfreq	rs6743819	G	T	-0.0191366	0.00212723	5.6e-19
alcohol_overallfreq	rs56166164	C	CA	-0.0185305	0.00214359	1.1e-17
alcohol_overallfreq	rs10205219	T	C	-0.0191513	0.00212718	5.2e-19
alcohol_overallfreq	rs10205592	T	C	-0.0216757	0.00210175	1.8e-24
alcohol_overallfreq	rs112796438	C	A	-0.0192239	0.00212814	3.9e-19
alcohol_overallfreq	2:27572006_ATTTGAT_A	ATTTGAT	A	-0.0191487	0.00213211	6.6e-19
alcohol_overallfreq	rs34264490	C	CA	-0.0193669	0.00213199	2.5e-19
alcohol_overallfreq	rs11693959	T	C	-0.0169106	0.00231573	3.4e-13
alcohol_overallfreq	rs4665969	T	C	-0.0192274	0.00212809	3.9e-19
alcohol_overallfreq	rs745860808	CA	C	-0.0161499	0.00215515	1e-13
alcohol_overallfreq	rs12991930	T	C	0.0260484	0.00446831	8.4e-09
alcohol_overallfreq	rs6760828	T	C	-0.0192064	0.00212778	4.1e-19
alcohol_overallfreq	rs9678013	A	G	-0.0220688	0.00210217	2.2e-25
alcohol_overallfreq	rs6729692	G	T	-0.0158311	0.00221818	1.7e-12
alcohol_overallfreq	rs6729709	G	A	-0.0219959	0.00209988	2.6e-25
alcohol_overallfreq	rs6716894	A	G	-0.0188247	0.00213485	2.5e-18
alcohol_overallfreq	2:27583606_AT_A	AT	A	-0.0186218	0.00213129	4.6e-18
alcohol_overallfreq	rs61183156	TG	T	-0.0188624	0.00213594	2e-18
alcohol_overallfreq	rs548218593	G	T	-0.0188624	0.00213594	2e-18
alcohol_overallfreq	rs7586601	A	G	-0.0219116	0.0020972	3.7e-25
alcohol_overallfreq	rs11409868	T	TA	-0.0185206	0.00213914	9.1e-18
alcohol_overallfreq	rs11695549	A	C	-0.0181272	0.00214651	5.2e-17
alcohol_overallfreq	rs372524722	C	CT	-0.0175063	0.00220268	3.2e-15
alcohol_overallfreq	2:27588961_CTG_C	CTG	C	-0.0190489	0.00214277	1.3e-18
alcohol_overallfreq	rs2280737	T	C	-0.0187835	0.00213292	2.6e-18
alcohol_overallfreq	rs80051818	T	C	-0.0180517	0.0022256	4.1e-16
alcohol_overallfreq	rs7602534	C	T	-0.0179821	0.00213472	6.2e-17
alcohol_overallfreq	rs1528533	G	C	-0.0176416	0.00213105	2e-16
alcohol_overallfreq	rs6547589	C	A	-0.0175911	0.00213079	2.4e-16
alcohol_overallfreq	rs765521090	CTT	C	-0.0178942	0.00213257	7.8e-17
alcohol_overallfreq	rs4665972	T	C	-0.0342802	0.00214171	1.8e-57
alcohol_overallfreq	rs12475426	G	A	-0.0179009	0.002128	5.9e-17
alcohol_overallfreq	rs1104	T	G	-0.0175868	0.00213101	2.5e-16
alcohol_overallfreq	rs13472	G	A	-0.0179129	0.00213508	8.1e-17
alcohol_overallfreq	rs4582	A	G	-0.0175508	0.00213184	2.9e-16
alcohol_overallfreq	rs35551468	G	GT	-0.0177142	0.00217575	7.2e-16
alcohol_overallfreq	rs34341829	G	A	-0.0179652	0.00213516	6.6e-17
alcohol_overallfreq	rs1647284	C	T	-0.0176443	0.00213115	2e-16
alcohol_overallfreq	rs111595594	A	G	-0.0176396	0.00213119	2e-16
alcohol_overallfreq	rs7594812	A	G	-0.0176685	0.00213138	1.8e-16
alcohol_overallfreq	rs1728926	A	G	-0.0184168	0.00216638	2.9e-17
alcohol_overallfreq	rs1647281	G	C	-0.0183702	0.00216695	3.5e-17
alcohol_overallfreq	rs12476704	C	A	-0.018032	0.00213543	5.1e-17
alcohol_overallfreq	rs72819512	G	A	-0.0172997	0.00214861	1.2e-15
alcohol_overallfreq	rs12478747	T	G	-0.0177357	0.00219694	9.3e-16
alcohol_overallfreq	rs12478779	T	G	-0.0184896	0.0021415	9.7e-18
alcohol_overallfreq	rs1271144	C	T	-0.0176917	0.00213153	1.7e-16
alcohol_overallfreq	rs11897554	C	T	-0.0180295	0.00213559	5.1e-17
alcohol_overallfreq	rs535914125	T	TG	-0.0171201	0.0025406	1.8e-11
alcohol_overallfreq	rs809058	T	C	-0.0177054	0.00213169	1.6e-16
alcohol_overallfreq	2:27618012_CACT_C	CACT	C	-0.0178796	0.00213234	8.3e-17
alcohol_overallfreq	2:27618117_AG_A	AG	A	-0.0168319	0.00213142	4.8e-15
alcohol_overallfreq	rs1083864	C	G	-0.021923	0.00209758	3e-25
alcohol_overallfreq	2:27620179_AAAG_A	AAAG	A	-0.0181776	0.00214934	4.5e-17
alcohol_overallfreq	2:27620184_AGAC_A	AGAC	A	-0.0182318	0.00215108	3.8e-17
alcohol_overallfreq	rs1083865	A	G	-0.0176778	0.00213197	1.8e-16
alcohol_overallfreq	rs142026887	A	AAACAACAAC	-0.0182653	0.0021396	2.5e-17
alcohol_overallfreq	2:27624996_GAA_G	GAA	G	-0.0182173	0.002137	2.6e-17
alcohol_overallfreq	rs1260338	A	G	-0.0219236	0.00209672	2.9e-25
alcohol_overallfreq	rs770845392	CAATAAATAAATA	C	-0.0194184	0.00210657	7.3e-20
alcohol_overallfreq	rs147955098	T	TA	-0.0184647	0.00214447	1.2e-17
alcohol_overallfreq	rs4665975	A	T	-0.0179622	0.0021367	6.9e-17
alcohol_overallfreq	rs2911712	A	T	-0.0177181	0.00213247	1.5e-16
alcohol_overallfreq	rs2950834	G	A	-0.0177309	0.00213254	1.5e-16
alcohol_overallfreq	rs7566052	A	G	-0.017909	0.00213391	7.6e-17
alcohol_overallfreq	rs7563162	C	T	-0.0177286	0.00213265	1.5e-16
alcohol_overallfreq	rs759050394	CTGAT	C	-0.0182101	0.00213772	2.8e-17
alcohol_overallfreq	rs56377105	T	C	-0.0182986	0.00219661	1.2e-16
alcohol_overallfreq	rs55675047	T	C	-0.0182986	0.00219661	1.2e-16
alcohol_overallfreq	rs1728918	A	G	-0.0300934	0.0023439	1.2e-37
alcohol_overallfreq	rs1060525	A	G	-0.0177376	0.00213266	1.4e-16
alcohol_overallfreq	rs201920988	C	A	-0.0177825	0.00214952	1.9e-16
alcohol_overallfreq	rs112882369	C	T	-0.0182006	0.00253649	9.6e-13
alcohol_overallfreq	rs12473776	A	G	-0.0179239	0.00213355	7e-17
alcohol_overallfreq	rs2010087	C	T	-0.0180727	0.00213666	4.4e-17
alcohol_overallfreq	rs4665976	A	G	-0.0177357	0.00213268	1.4e-16
alcohol_overallfreq	rs2911713	G	A	-0.0177417	0.00213268	1.4e-16
alcohol_overallfreq	2:27641353_GT_G	GT	G	-0.0185179	0.00214248	8.6e-18
alcohol_overallfreq	rs11690265	C	T	-0.0180774	0.00213668	4.3e-17
alcohol_overallfreq	rs11675563	A	G	-0.0180616	0.00213676	4.6e-17
alcohol_overallfreq	rs1728922	A	C	-0.0177332	0.00213264	1.4e-16
alcohol_overallfreq	rs59644396	A	G	-0.0175261	0.00215826	6.3e-16
alcohol_overallfreq	rs6547626	C	T	-0.0177308	0.00213263	1.4e-16
alcohol_overallfreq	rs1625123	A	G	-0.0177261	0.00213248	1.5e-16
alcohol_overallfreq	rs11691432	C	T	-0.0177254	0.00213208	1.4e-16
alcohol_overallfreq	rs13388159	A	T	-0.0180377	0.00213491	4.7e-17
alcohol_overallfreq	rs4665977	A	G	-0.0177403	0.00213009	1.3e-16
alcohol_overallfreq	rs4665978	T	C	-0.0219813	0.002094	1.8e-25
alcohol_overallfreq	rs13391837	A	G	-0.0179248	0.00213416	7.6e-17
alcohol_overallfreq	2:27649526_ACT_A	ACT	A	-0.0180578	0.00213617	4.7e-17
alcohol_overallfreq	rs1728911	T	G	-0.0218321	0.00209402	4e-25
alcohol_overallfreq	rs1647267	A	T	-0.0172995	0.00213449	8.5e-16
alcohol_overallfreq	rs2303370	C	T	-0.0215438	0.00209625	1.9e-24
alcohol_overallfreq	rs10182937	T	C	-0.0173218	0.00213453	7.8e-16
alcohol_overallfreq	rs780100	G	T	-0.0173068	0.00213449	8.3e-16
alcohol_overallfreq	rs35886281	C	CGAG	-0.017506	0.00213495	3.9e-16
alcohol_overallfreq	rs780101	C	T	-0.0185975	0.00215237	1e-17
alcohol_overallfreq	rs61609483	T	TC	-0.01751	0.00213595	3.9e-16
alcohol_overallfreq	rs3845686	T	G	-0.0178926	0.00213434	8.7e-17
alcohol_overallfreq	rs809673	A	G	-0.0175773	0.00213009	2.5e-16
alcohol_overallfreq	rs3214499	G	GA	-0.0218722	0.00209386	3.3e-25
alcohol_overallfreq	rs704791	T	C	-0.0175786	0.00213011	2.5e-16
alcohol_overallfreq	rs780102	T	C	-0.0175253	0.00213021	3.1e-16
alcohol_overallfreq	rs780103	T	C	-0.0175782	0.00213011	2.5e-16
alcohol_overallfreq	2:27661044_CA_C	CA	C	-0.0186997	0.00215943	1.1e-17
alcohol_overallfreq	2:27661114_AG_A	AG	A	-0.017675	0.00213138	1.8e-16
alcohol_overallfreq	rs1260341	T	A	-0.0175761	0.00213011	2.5e-16
alcohol_overallfreq	rs1260342	G	T	-0.0176006	0.00213016	2.3e-16
alcohol_overallfreq	rs780112	C	G	-0.0176989	0.00213028	1.5e-16
alcohol_overallfreq	rs4803	A	G	-0.0177313	0.00213018	1.4e-16
alcohol_overallfreq	rs10635082	T	TTTTG	-0.0218078	0.00209454	4.8e-25
alcohol_overallfreq	2:27669341_AT_A	AT	A	-0.0173442	0.0021392	8.3e-16
alcohol_overallfreq	rs11430923	G	GT	-0.0178411	0.0021361	1e-16
alcohol_overallfreq	rs112979049	T	C	0.072235	0.0131596	4e-08
alcohol_overallfreq	rs10207700	T	C	-0.0177572	0.0021303	1.3e-16
alcohol_overallfreq	rs11126999	G	A	-0.0178908	0.00213457	8.7e-17
alcohol_overallfreq	rs7597145	T	C	-0.017722	0.00213035	1.4e-16
alcohol_overallfreq	rs7580759	C	T	-0.0177266	0.00213033	1.4e-16
alcohol_overallfreq	rs1262430	T	C	-0.0178287	0.00213025	9.4e-17
alcohol_overallfreq	rs1260343	G	T	-0.0178422	0.00213631	1.1e-16
alcohol_overallfreq	rs750801245	AAAC	A	-0.0220759	0.00288976	1.3e-14
alcohol_overallfreq	rs56076827	A	T	-0.0180434	0.00213425	4.7e-17
alcohol_overallfreq	rs780104	G	A	-0.0176655	0.00213021	1.8e-16
alcohol_overallfreq	rs780105	A	G	-0.0218482	0.00209395	3.8e-25
alcohol_overallfreq	rs11887784	A	G	-0.0179767	0.00213434	6.2e-17
alcohol_overallfreq	rs780106	A	C	-0.0177007	0.00213016	1.5e-16
alcohol_overallfreq	rs72819536	G	T	-0.0180536	0.00213453	4.5e-17
alcohol_overallfreq	rs780107	A	G	-0.0177458	0.00213037	1.3e-16
alcohol_overallfreq	rs780108	T	C	-0.0217817	0.00209384	5.2e-25
alcohol_overallfreq	rs780109	C	T	-0.0177441	0.00213038	1.3e-16
alcohol_overallfreq	rs780110	G	A	-0.0218971	0.00209394	2.9e-25
alcohol_overallfreq	2:27686396_CT_C	CT	C	-0.0179368	0.00214735	1.2e-16
alcohol_overallfreq	rs67086575	A	G	0.0249428	0.0027768	2.5e-19
alcohol_overallfreq	rs576114900	A	AT	-0.0174062	0.00229835	4.4e-14
alcohol_overallfreq	rs1647276	C	T	-0.0176975	0.00213015	1.6e-16
alcohol_overallfreq	rs1406295	A	G	-0.0176214	0.00213018	2.1e-16
alcohol_overallfreq	rs3845687	T	C	-0.0179872	0.00213444	5.9e-17
alcohol_overallfreq	rs11904779	C	T	-0.0179412	0.00213433	7.1e-17
alcohol_overallfreq	rs773363459	CA	C	-0.0177897	0.00213288	1.2e-16
alcohol_overallfreq	rs12464368	C	A	-0.017189	0.0021479	1.7e-15
alcohol_overallfreq	rs1728912	T	C	-0.0176776	0.00213012	1.7e-16
alcohol_overallfreq	rs1647265	A	G	-0.0176997	0.00213015	1.6e-16
alcohol_overallfreq	rs7562296	A	G	-0.0240682	0.00382453	2.8e-10
alcohol_overallfreq	rs11127013	A	G	-0.0180469	0.00213442	4.6e-17
alcohol_overallfreq	2:27693137_GAAAA_G	GAAAA	G	-0.0179326	0.00213581	7.6e-17
alcohol_overallfreq	rs1647266	T	C	-0.0176996	0.00213015	1.6e-16
alcohol_overallfreq	2:27694905_CA_C	CA	C	-0.0153205	0.00222081	7.1e-12
alcohol_overallfreq	rs113954968	A	C	-0.0179952	0.00213492	5.8e-17
alcohol_overallfreq	rs7596856	C	T	-0.0180733	0.00213404	4e-17
alcohol_overallfreq	rs147998458	C	CAGA	-0.017964	0.00213207	5.7e-17
alcohol_overallfreq	rs780117	C	G	-0.0176922	0.00213043	1.6e-16
alcohol_overallfreq	2:27698644_CT_C	CT	C	-0.0179626	0.00213446	6.2e-17
alcohol_overallfreq	rs780115	A	C	-0.0163932	0.00211391	1.5e-14
alcohol_overallfreq	rs1260345	A	G	-0.0164692	0.00211335	1.1e-14
alcohol_overallfreq	rs1260330	T	C	-0.0164759	0.0021136	1.1e-14
alcohol_overallfreq	rs1260329	T	C	-0.0164754	0.0021136	1.1e-14
alcohol_overallfreq	rs2272417	T	C	-0.0167641	0.00211686	4.2e-15
alcohol_overallfreq	rs809059	A	G	-0.0164983	0.00211361	1e-14
alcohol_overallfreq	rs13001266	C	T	0.0268345	0.00447498	3.2e-09
alcohol_overallfreq	rs199903703	C	CA	-0.0167731	0.00211697	4.1e-15
alcohol_overallfreq	rs386644222	G	GACT	-0.0167731	0.00211697	4.1e-15
alcohol_overallfreq	rs386644222	G	GGACT	-0.0166864	0.0021192	6.1e-15
alcohol_overallfreq	rs1260328	T	C	-0.0164074	0.00211372	1.4e-14
alcohol_overallfreq	rs1260327	A	G	-0.020759	0.00208683	6e-23
alcohol_overallfreq	rs10181100	G	A	-0.0181779	0.00213441	2.7e-17
alcohol_overallfreq	rs1647285	A	C	-0.0179572	0.00213606	7.1e-17
alcohol_overallfreq	rs1647286	A	T	-0.0179425	0.00213631	7.5e-17
alcohol_overallfreq	rs2288155	T	C	-0.0182243	0.00214006	2.8e-17
alcohol_overallfreq	rs8395	T	A	-0.0182045	0.00213437	2.4e-17
alcohol_overallfreq	rs41291151	G	A	0.0769922	0.0139838	3.9e-08
alcohol_overallfreq	rs2303369	C	T	-0.0182646	0.00213476	1.9e-17
alcohol_overallfreq	rs780088	T	C	-0.017865	0.00213059	7.8e-17
alcohol_overallfreq	rs704795	G	A	-0.0178776	0.00213093	7.5e-17
alcohol_overallfreq	rs780090	T	C	-0.0241892	0.00382406	2.3e-10
alcohol_overallfreq	rs111461122	C	CAATGTTG	-0.0164297	0.00211633	1.4e-14
alcohol_overallfreq	rs813592	T	C	-0.017819	0.0021297	8.8e-17
alcohol_overallfreq	rs1260320	G	A	-0.0178682	0.00212996	7.2e-17
alcohol_overallfreq	rs715325	C	A	-0.0178704	0.00212961	7e-17
alcohol_overallfreq	rs715326	C	T	-0.0180785	0.00213348	3.7e-17
alcohol_overallfreq	rs10169261	C	T	-0.0179222	0.00213198	6.2e-17
alcohol_overallfreq	rs2293572	C	G	-0.0182593	0.002137	2e-17
alcohol_overallfreq	rs2293571	G	A	-0.0182961	0.00213681	1.7e-17
alcohol_overallfreq	rs1260326	T	C	-0.0357183	0.00212915	3.5e-63
alcohol_overallfreq	rs3817588	T	C	-0.0234784	0.00264364	3.4e-19
alcohol_overallfreq	rs35073769	C	T	-0.0181548	0.0021357	3e-17
alcohol_overallfreq	rs553027038	C	CTT	-0.0237249	0.00287844	1.1e-16
alcohol_overallfreq	rs767579581	G	GTG	-0.0320295	0.00567021	1.1e-08
alcohol_overallfreq	rs148527487	A	AT	-0.0239676	0.00284873	2.1e-17
alcohol_overallfreq	rs4425043	G	A	-0.018147	0.00213625	3.2e-17
alcohol_overallfreq	rs6547692	G	A	-0.0304283	0.00209598	9.1e-48
alcohol_overallfreq	rs141428740	G	A	0.027152	0.00451955	2.6e-09
alcohol_overallfreq	rs8179225	A	G	-0.0181916	0.00213595	2.7e-17
alcohol_overallfreq	rs8179229	A	T	-0.0181287	0.00213594	3.4e-17
alcohol_overallfreq	rs12471703	C	T	-0.0180994	0.00213558	3.8e-17
alcohol_overallfreq	2:27739880_CT_C	CT	C	-0.0308349	0.00213952	5e-47
alcohol_overallfreq	rs11127044	C	G	-0.0181713	0.00213508	2.8e-17
alcohol_overallfreq	rs780096	C	G	-0.0302621	0.00210068	4.3e-47
alcohol_overallfreq	rs780095	A	G	-0.030315	0.00210062	3e-47
alcohol_overallfreq	rs780094	T	C	-0.0361306	0.00214042	6.7e-64
alcohol_overallfreq	rs780093	T	C	-0.0359947	0.00214043	1.8e-63
alcohol_overallfreq	rs780092	A	G	-0.0246452	0.00283254	1.7e-18
alcohol_overallfreq	rs814295	A	G	-0.0237616	0.00280651	1.3e-17
alcohol_overallfreq	rs11681351	G	A	-0.0171615	0.00212537	1.1e-15
alcohol_overallfreq	rs13022659	C	T	-0.0172001	0.00212557	9.1e-16
alcohol_overallfreq	rs74928908	A	G	-0.0246928	0.00283582	1.6e-18
alcohol_overallfreq	2:27744364_ATT_A	ATT	A	-0.0299143	0.0021079	9.5e-46
alcohol_overallfreq	rs8179249	G	A	0.0728066	0.0125445	6.2e-09
alcohol_overallfreq	rs141306206	GT	G	-0.0301572	0.00211054	2.2e-46
alcohol_overallfreq	rs7589217	A	G	-0.0171746	0.00212603	1e-15
alcohol_overallfreq	rs8179252	A	C	-0.017144	0.00212627	1.2e-15
alcohol_overallfreq	rs1260334	C	A	-0.030235	0.00209908	4.4e-47
alcohol_overallfreq	rs1260333	A	G	-0.0302488	0.00209903	4e-47
alcohol_overallfreq	2:27748700_CACACACACACACAT_C	CACACACACACACAT	C	-0.0241298	0.00231712	1.8e-25
alcohol_overallfreq	rs55828214	G	C	-0.0146571	0.00229868	1.9e-10
alcohol_overallfreq	rs1313566	G	A	-0.0302137	0.00210237	6.9e-47
alcohol_overallfreq	2:27748992_AT_A	AT	A	-0.0364106	0.00215126	2.8e-64
alcohol_overallfreq	rs11682621	G	A	-0.0172226	0.00213428	1.1e-15
alcohol_overallfreq	rs6744393	C	T	-0.0242738	0.00285517	9.2e-18
alcohol_overallfreq	rs2950835	A	G	-0.029653	0.00210924	5.3e-45
alcohol_overallfreq	rs2911711	T	A	-0.029654	0.00210926	5.2e-45
alcohol_overallfreq	2:27750810_AT_A	AT	A	-0.0292294	0.0021575	4.6e-42
alcohol_overallfreq	2:27750997_GT_G	GT	G	-0.0238497	0.00285624	3.2e-17
alcohol_overallfreq	rs78680773	A	C	-0.023908	0.00285922	3e-17
alcohol_overallfreq	rs11682083	A	G	-0.0173582	0.00213531	5.8e-16
alcohol_overallfreq	rs11127048	G	A	-0.035831	0.00217254	1.9e-61
alcohol_overallfreq	rs6753534	C	T	-0.0294675	0.00211448	2e-44
alcohol_overallfreq	rs4665985	A	C	0.028067	0.00236352	8.4e-33
alcohol_overallfreq	rs757820004	CAT	C	-0.0199735	0.00254913	2.4e-15
alcohol_overallfreq	rs62131879	T	G	-0.0197016	0.00254703	5.4e-15
alcohol_overallfreq	rs4665987	G	A	0.0285078	0.00238694	6.1e-33
alcohol_overallfreq	rs10181342	A	G	-0.0198576	0.00254617	3.3e-15
alcohol_overallfreq	rs4665988	C	A	0.028528	0.00238682	5.5e-33
alcohol_overallfreq	rs76019819	A	T	-0.0203211	0.00248702	1.6e-16
alcohol_overallfreq	rs549284860	T	C	-0.020228	0.00260912	4.6e-15
alcohol_overallfreq	rs116443177	C	T	-0.0161576	0.00296936	3.6e-08
alcohol_overallfreq	rs77200710	C	T	0.0285749	0.00241366	2.3e-32
alcohol_overallfreq	rs62131881	G	T	-0.0197515	0.00254675	4.5e-15
alcohol_overallfreq	rs62131882	T	C	-0.0197497	0.00254675	4.6e-15
alcohol_overallfreq	rs12473139	T	C	0.0285591	0.00238637	4.5e-33
alcohol_overallfreq	rs4665991	G	A	0.0285676	0.00238656	4.5e-33
alcohol_overallfreq	2:27766414_CA_C	CA	C	-0.0198364	0.00244795	2.2e-16
alcohol_overallfreq	2:27767488_GC_G	GC	G	0.0286391	0.00238784	3.3e-33
alcohol_overallfreq	rs62141278	C	T	-0.0197586	0.0025467	4.4e-15
alcohol_overallfreq	rs62141279	C	T	-0.0197337	0.00254664	4.8e-15
alcohol_overallfreq	rs757650690	C	CAA	0.0284053	0.00242016	8e-32
alcohol_overallfreq	rs559524084	C	CT	-0.0199751	0.00257563	4.8e-15
alcohol_overallfreq	rs2384627	G	A	-0.0197334	0.00254649	4.8e-15
alcohol_overallfreq	rs754049756	AT	A	0.0287776	0.00239797	3.4e-33
alcohol_overallfreq	rs62141281	G	T	-0.0196658	0.00254589	5.9e-15
alcohol_overallfreq	rs6751087	T	C	-0.0196599	0.00254586	5.9e-15
alcohol_overallfreq	rs12995461	A	C	0.0285313	0.00238711	5.5e-33
alcohol_overallfreq	rs10169065	A	G	0.0285128	0.0023869	5.8e-33
alcohol_overallfreq	rs10179872	G	A	0.0285183	0.00238693	5.7e-33
alcohol_overallfreq	2:27779001_CAAA_C	CAAA	C	0.026319	0.0023428	2.4e-29
alcohol_overallfreq	2:27779151_CTT_C	CTT	C	0.0285433	0.00238569	4.6e-33
alcohol_overallfreq	rs752635578	T	TATA	-0.0189333	0.00280667	1e-11
alcohol_overallfreq	rs202049562	T	A	-0.0234229	0.00278852	1.8e-17
alcohol_overallfreq	rs145508558	T	TTTAA	0.0215156	0.0025944	5.9e-17
alcohol_overallfreq	rs62141288	G	A	-0.021445	0.00259465	7.7e-17
alcohol_overallfreq	2:27783200_CTG_C	CTG	C	-0.0213227	0.00338128	1.6e-10
alcohol_overallfreq	rs62141289	C	T	-0.0198691	0.00254816	3.2e-15
alcohol_overallfreq	rs796751533	G	GAC	-0.0198691	0.00254816	3.2e-15
alcohol_overallfreq	rs62141290	T	C	-0.0199209	0.00254686	2.6e-15
alcohol_overallfreq	rs4665382	T	C	0.028571	0.00238706	4.5e-33
alcohol_overallfreq	rs62141291	C	T	-0.0198475	0.00254633	3.3e-15
alcohol_overallfreq	rs62141292	A	C	-0.0200163	0.00254549	1.9e-15
alcohol_overallfreq	rs7570476	C	T	0.028555	0.00238683	4.7e-33
alcohol_overallfreq	rs10208529	A	T	0.0285424	0.00238678	5e-33
alcohol_overallfreq	2:27786252_CTTTTTTTTTT_C	CTTTTTTTTTT	C	0.0178516	0.00282509	3.8e-10
alcohol_overallfreq	rs60854669	T	C	-0.0198221	0.00254608	3.6e-15
alcohol_overallfreq	rs965813	T	A	-0.0200182	0.00254546	1.9e-15
alcohol_overallfreq	rs4665383	C	G	0.0285545	0.00238683	4.8e-33
alcohol_overallfreq	rs59876138	A	C	-0.0198628	0.00254548	3.1e-15
alcohol_overallfreq	rs7577311	G	T	0.0285395	0.00238659	5e-33
alcohol_overallfreq	rs6704596	A	G	-0.0198889	0.00254467	2.8e-15
alcohol_overallfreq	rs1919127	T	C	0.0285178	0.00238657	5.7e-33
alcohol_overallfreq	rs1919128	A	G	0.028558	0.0023863	4.6e-33
alcohol_overallfreq	rs3811644	A	G	-0.0198746	0.00254615	3e-15
alcohol_overallfreq	rs6734059	T	C	-0.0199483	0.0025449	2.3e-15
alcohol_overallfreq	2:27810150_TTTTC_T	TTTTC	T	-0.0180003	0.00281214	1e-10
alcohol_overallfreq	rs574622475	C	CT	0.0287238	0.00241656	1.2e-32
alcohol_overallfreq	rs12478841	A	G	0.0281268	0.0023958	7.5e-32
alcohol_overallfreq	rs6760250	G	A	0.0285039	0.00238644	5.9e-33
alcohol_overallfreq	rs62138963	C	T	-0.0197974	0.00254774	4e-15
alcohol_overallfreq	rs62138964	C	T	-0.0197999	0.00254775	4e-15
alcohol_overallfreq	rs13022873	A	C	0.0284254	0.0023877	9.8e-33
alcohol_overallfreq	rs76013440	G	A	-0.0198671	0.00254619	3e-15
alcohol_overallfreq	rs62138965	T	C	-0.0197813	0.00254559	4e-15
alcohol_overallfreq	rs13010586	G	A	0.0285566	0.00238696	4.7e-33
alcohol_overallfreq	rs1919129	C	G	-0.0199214	0.00254357	2.5e-15
alcohol_overallfreq	rs62138966	G	A	-0.0198353	0.00254507	3.4e-15
alcohol_overallfreq	rs12989678	C	T	0.0286413	0.00238694	3.1e-33
alcohol_overallfreq	rs78378018	G	GAC	-0.0198202	0.00254791	3.7e-15
alcohol_overallfreq	rs56725354	G	C	-0.0198494	0.0025451	3.3e-15
alcohol_overallfreq	rs62138968	C	G	-0.0198583	0.00254521	3.2e-15
alcohol_overallfreq	rs112927528	T	TTTTTG	-0.0206125	0.00259593	1.1e-15
alcohol_overallfreq	rs12467476	T	C	0.0286726	0.0023886	2.9e-33
alcohol_overallfreq	rs140043162	G	GTGTGTGTGTA	-0.021297	0.0034079	2.1e-10
alcohol_overallfreq	rs12464616	C	T	0.0287087	0.00238838	2.5e-33
alcohol_overallfreq	rs2141372	G	T	-0.0200054	0.00254321	1.9e-15
alcohol_overallfreq	rs746509899	TACAGTCATGTAACC	T	0.0286293	0.00238827	3.6e-33
alcohol_overallfreq	rs6719960	A	G	-0.0200165	0.00254286	1.9e-15
alcohol_overallfreq	rs6547735	T	C	-0.020019	0.00254294	1.9e-15
alcohol_overallfreq	rs2384656	A	G	0.0286347	0.00238847	3.5e-33
alcohol_overallfreq	rs1881397	A	G	-0.0190111	0.00247704	8.6e-15
alcohol_overallfreq	2:27832736_CA_C	CA	C	-0.0197061	0.00254622	6.6e-15
alcohol_overallfreq	rs34497903	A	T	0.0135493	0.00214312	3.7e-10
alcohol_overallfreq	rs67798437	T	A	0.0135462	0.00214368	3.7e-10
alcohol_overallfreq	2:27833327_TTATATATG_T	TTATATATG	T	-0.0194416	0.00256349	1.7e-14
alcohol_overallfreq	rs201029545	G	GTA	-0.0198788	0.00260668	1.2e-14
alcohol_overallfreq	rs74175068	T	C	0.0286334	0.0023881	3.6e-33
alcohol_overallfreq	rs34016998	C	T	0.0286377	0.0023876	3.5e-33
alcohol_overallfreq	rs12987055	T	C	0.0286464	0.00238776	3.4e-33
alcohol_overallfreq	rs13405762	A	C	-0.0199287	0.00254419	2.7e-15
alcohol_overallfreq	rs78170284	G	A	-0.0198394	0.00254713	3.6e-15
alcohol_overallfreq	rs13020949	C	T	0.0286427	0.00238746	3.4e-33
alcohol_overallfreq	2:27837544_CA_C	CA	C	0.0270053	0.00236797	4.6e-30
alcohol_overallfreq	2:27837673_CT_C	CT	C	-0.0198225	0.00254783	3.8e-15
alcohol_overallfreq	rs1881395	G	A	-0.019804	0.00254616	4.1e-15
alcohol_overallfreq	rs4666000	T	C	0.0264625	0.00234446	1.4e-29
alcohol_overallfreq	rs2068834	T	C	0.0264444	0.00234454	1.5e-29
alcohol_overallfreq	rs7571558	C	G	-0.0199582	0.00254433	2.4e-15
alcohol_overallfreq	rs4666002	G	C	0.0286138	0.00238785	4.1e-33
alcohol_overallfreq	rs62138971	G	A	-0.019714	0.00254568	5.4e-15
alcohol_overallfreq	rs373931589	C	CA	-0.0147367	0.00264507	1.7e-08
alcohol_overallfreq	rs1881396	T	G	-0.0200843	0.00253865	1.2e-15
alcohol_overallfreq	rs3749147	G	A	0.0281959	0.00239999	6.8e-32
alcohol_overallfreq	rs13002853	C	G	0.0283055	0.00240017	4.2e-32
alcohol_overallfreq	rs34502053	G	A	0.0281492	0.00239982	9e-32
alcohol_overallfreq	rs10173720	A	T	-0.0184764	0.00252444	1.4e-13
alcohol_overallfreq	rs570040966	A	AT	-0.0186574	0.00272472	4.2e-12
alcohol_overallfreq	rs6719175	T	A	0.0258684	0.00235483	4.3e-28
alcohol_overallfreq	rs2141371	G	A	0.0181659	0.00232444	3e-15
alcohol_overallfreq	rs77350364	A	G	-0.0183888	0.00252675	2e-13
alcohol_overallfreq	rs35012162	G	GT	0.026243	0.00262112	1.2e-23
alcohol_overallfreq	rs113160276	G	A	-0.0152125	0.00226116	2.1e-11
alcohol_overallfreq	rs12474585	C	T	-0.0183396	0.0025267	2.3e-13
alcohol_overallfreq	2:27872312_AATAT_A	AATAT	A	0.0260139	0.00258883	8.3e-24
alcohol_overallfreq	rs8731	C	G	-0.0184599	0.00252598	1.6e-13
alcohol_overallfreq	rs774624803	TAAA	T	-0.0185622	0.00253042	1.2e-13
alcohol_overallfreq	2:27875041_TA_T	TA	T	-0.0185622	0.00253042	1.2e-13
alcohol_overallfreq	rs4666010	T	C	-0.0185551	0.00252674	1.2e-13
alcohol_overallfreq	rs2272406	A	T	0.0262168	0.00258991	3.8e-24
alcohol_overallfreq	rs2178198	C	T	0.0233228	0.00312935	1.1e-13
alcohol_overallfreq	rs13021208	C	T	0.0262867	0.00259029	3e-24
alcohol_overallfreq	rs13023094	A	C	0.0261114	0.00258959	5.8e-24
alcohol_overallfreq	rs12998770	T	C	0.0262725	0.00259051	3.2e-24
alcohol_overallfreq	rs13030973	T	C	0.0256964	0.0025817	1.8e-23
alcohol_overallfreq	rs6727388	A	G	0.0256275	0.00258228	2.4e-23
alcohol_overallfreq	rs4616435	C	T	0.0255792	0.00258279	2.9e-23
alcohol_overallfreq	rs58199976	T	C	-0.0188864	0.00235643	6e-16
alcohol_overallfreq	rs6727215	G	A	0.0256136	0.00258278	2.5e-23
alcohol_overallfreq	rs4665386	C	A	-0.0183844	0.00295213	2.5e-10
alcohol_overallfreq	rs6742571	A	G	0.0183328	0.00252971	2.7e-13
alcohol_overallfreq	rs113684696	CT	C	0.0187037	0.00246345	1.9e-14
alcohol_overallfreq	rs10432705	G	A	0.025361	0.00258105	6e-23
alcohol_overallfreq	rs867282	T	C	0.0184975	0.00248427	5.9e-14
alcohol_overallfreq	rs2384655	A	T	0.0188788	0.00246074	9.9e-15
alcohol_overallfreq	rs12994085	C	T	0.0187844	0.00246059	1.3e-14
alcohol_overallfreq	rs12993377	G	C	0.0187902	0.00246085	1.3e-14
alcohol_overallfreq	rs12624148	C	T	-0.0183393	0.00248516	9.6e-14
alcohol_overallfreq	rs6753736	C	G	0.0186272	0.00246003	2.2e-14
alcohol_overallfreq	rs62139017	C	T	0.0217282	0.00314068	6.3e-12
alcohol_overallfreq	rs1317580	G	C	0.0134001	0.00239572	1.8e-08
alcohol_overallfreq	rs75429814	T	C	-0.0151948	0.00270271	1.3e-08
alcohol_overallfreq	rs111938697	C	T	-0.0173533	0.00241698	4.6e-13
alcohol_overallfreq	rs12714223	G	A	0.0176445	0.00239427	1.2e-13
alcohol_overallfreq	rs9678824	G	C	-0.0177657	0.0023954	7.7e-14
alcohol_overallfreq	rs749883957	CA	C	0.0197412	0.00341001	5.6e-09
alcohol_overallfreq	2:27966521_CA_C	CA	C	-0.0177705	0.00243348	1.9e-13
alcohol_overallfreq	rs13023194	G	C	0.025569	0.00278271	2.5e-20
alcohol_overallfreq	rs9967838	A	C	0.0176542	0.00239654	1.1e-13
alcohol_overallfreq	rs146970899	A	AT	0.018202	0.00241535	3.1e-14
alcohol_overallfreq	rs13425660	A	G	0.0172421	0.00276025	2.2e-10
alcohol_overallfreq	rs78945592	A	G	0.0172421	0.00276025	2.2e-10
alcohol_overallfreq	rs35104611	A	G	-0.0131491	0.00235552	1.5e-08
alcohol_overallfreq	rs9677663	G	A	0.0176595	0.00239393	1.1e-13
alcohol_overallfreq	rs12104449	A	G	0.0218523	0.00320648	1.5e-11
alcohol_overallfreq	rs57238885	C	G	-0.0177586	0.00239505	7.9e-14
alcohol_overallfreq	rs10201247	A	G	0.0176573	0.00239384	1.1e-13
alcohol_overallfreq	rs6547796	T	C	0.0176365	0.00239381	1.2e-13
alcohol_overallfreq	rs4666011	G	C	-0.0175061	0.00241614	2.8e-13
alcohol_overallfreq	rs10209020	C	T	0.0178578	0.00239578	5.8e-14
alcohol_overallfreq	rs12471347	G	C	-0.0175088	0.0024161	2.8e-13
alcohol_overallfreq	rs77154381	A	G	-0.0179014	0.0023967	5.2e-14
alcohol_overallfreq	rs12477908	A	C	0.0177168	0.00236236	3.6e-14
alcohol_overallfreq	rs13006480	C	G	0.0261856	0.00277784	2.2e-21
alcohol_overallfreq	rs13013484	G	A	0.0184561	0.00234116	1.9e-15
alcohol_overallfreq	rs4665390	C	T	-0.0178035	0.00238021	4.2e-14
alcohol_overallfreq	rs77644716	G	C	-0.0193019	0.00348591	1.7e-08
alcohol_overallfreq	rs3736594	A	C	0.0178802	0.00235774	1.9e-14
alcohol_overallfreq	rs3792252	G	A	0.0178727	0.00237575	3.2e-14
alcohol_overallfreq	rs74974644	G	A	-0.0207518	0.00386003	4.7e-08
alcohol_overallfreq	rs764054216	CT	C	0.0140144	0.00223613	2.2e-10
alcohol_overallfreq	rs35463245	C	G	-0.0140238	0.00253441	2e-08
alcohol_overallfreq	rs17006242	C	A	-0.0140482	0.00253427	1.9e-08
alcohol_overallfreq	rs3792253	T	C	-0.0140458	0.00253444	1.9e-08
alcohol_overallfreq	rs13030345	G	T	0.0252551	0.00278577	7.1e-20
alcohol_overallfreq	2:28003616_TA_T	TA	T	0.0261887	0.00282054	1e-20
alcohol_overallfreq	rs74327441	G	A	-0.0139311	0.00254566	2.7e-08
alcohol_overallfreq	rs7596967	T	G	-0.0141508	0.00251595	1.2e-08
alcohol_overallfreq	rs56158418	A	G	-0.0173245	0.00322567	4.2e-08
alcohol_overallfreq	2:28017491_CTTTTTTT_C	CTTTTTTT	C	-0.0151674	0.00258769	2.7e-09
alcohol_overallfreq	rs7593136	A	G	-0.0151688	0.00255215	1.7e-09
alcohol_overallfreq	rs6744348	A	C	-0.0154038	0.00255343	9.4e-10
alcohol_overallfreq	rs36035825	T	G	-0.0152757	0.00258311	2e-09
alcohol_overallfreq	rs4666012	A	G	-0.0154495	0.00258243	1.3e-09
alcohol_overallfreq	2:28019092_AT_A	AT	A	-0.0152398	0.00255962	1.5e-09
alcohol_overallfreq	rs4666013	C	T	-0.0153804	0.00255328	1e-09
alcohol_overallfreq	rs4666014	G	A	-0.0151575	0.00255161	1.7e-09
alcohol_overallfreq	rs4666015	G	A	-0.0154172	0.00255392	9.2e-10
alcohol_overallfreq	rs34181670	T	C	-0.0153086	0.00255338	1.2e-09
alcohol_overallfreq	rs35679500	T	C	-0.0151134	0.00258212	3e-09
alcohol_overallfreq	rs12623170	C	T	-0.0152977	0.00255324	1.2e-09
alcohol_overallfreq	rs3935148	T	A	-0.0148677	0.00258382	5.2e-09
alcohol_overallfreq	rs13027427	G	T	-0.014759	0.00255275	4.4e-09
alcohol_overallfreq	rs6745545	C	G	-0.0147164	0.0025801	7.4e-09
alcohol_overallfreq	rs7570730	G	A	-0.0149427	0.00255118	2.8e-09
alcohol_overallfreq	rs11127125	T	C	-0.0149135	0.00255038	3e-09
alcohol_overallfreq	rs11127126	C	T	-0.0147011	0.00254948	5e-09
alcohol_overallfreq	rs12473340	G	A	-0.0147942	0.00258236	6.1e-09
alcohol_overallfreq	rs12473400	G	T	-0.0149341	0.00255128	2.9e-09
alcohol_overallfreq	rs4630723	T	C	-0.0171515	0.00305058	1.1e-08
alcohol_overallfreq	rs13019037	C	T	-0.0148012	0.00258264	6.1e-09
alcohol_overallfreq	rs4632296	T	C	-0.0149677	0.00255172	2.7e-09
alcohol_overallfreq	rs13001060	T	C	-0.0146146	0.00255946	6.9e-09
alcohol_overallfreq	rs111946063	G	A	0.0762853	0.0132523	8e-09
alcohol_overallfreq	rs12995865	A	C	-0.014606	0.00255946	7e-09
alcohol_overallfreq	2:28025317_GTGTGTA_G	GTGTGTA	G	-0.01488	0.00275118	4e-08
alcohol_overallfreq	rs11891769	G	C	-0.0146945	0.00255023	5.2e-09
alcohol_overallfreq	rs568614872	CA	C	-0.0146781	0.00257544	7.3e-09
alcohol_overallfreq	rs12465012	C	T	-0.0147121	0.0025514	5e-09
alcohol_overallfreq	rs4665392	A	G	-0.014664	0.00255064	5.5e-09
alcohol_overallfreq	rs12986980	A	G	-0.014657	0.00255078	5.6e-09
alcohol_overallfreq	rs13023003	G	C	-0.0145631	0.00258279	1e-08
alcohol_overallfreq	rs12474906	A	C	-0.0143619	0.0026753	4.8e-08
alcohol_overallfreq	2:28048003_CA_C	CA	C	-0.0144627	0.00257725	1.3e-08
alcohol_overallfreq	rs577155408	G	GA	-0.0146663	0.002572	7.4e-09
alcohol_overallfreq	rs9679543	C	T	-0.0147483	0.00257169	6.2e-09
alcohol_overallfreq	rs34579271	T	C	0.0733242	0.0132734	3e-08
alcohol_overallfreq	2:28054761_GAA_G	GAA	G	-0.0147029	0.00257933	7.3e-09
alcohol_overallfreq	rs9678430	G	C	-0.0146558	0.00254069	4.9e-09
alcohol_overallfreq	rs4666022	T	C	-0.0146361	0.00254056	5.1e-09
alcohol_overallfreq	2:28058143_CA_C	CA	C	-0.0146815	0.0025825	7.6e-09
alcohol_overallfreq	rs12464988	C	T	-0.0146461	0.00254063	5e-09
alcohol_overallfreq	rs13027666	T	C	-0.0146327	0.00254056	5.1e-09
alcohol_overallfreq	rs746633536	ATT	A	-0.0147553	0.00254026	3.8e-09
alcohol_overallfreq	rs11885959	C	G	-0.01463	0.00254056	5.2e-09
alcohol_overallfreq	rs4665394	T	C	-0.01463	0.00254056	5.2e-09
alcohol_overallfreq	rs12617110	A	G	-0.0146454	0.00254046	5e-09
alcohol_overallfreq	rs12617113	A	G	-0.0146381	0.00254048	5e-09
alcohol_overallfreq	rs12992890	T	C	-0.0146452	0.00254053	4.9e-09
alcohol_overallfreq	rs34096628	A	C	-0.0146454	0.00254053	4.9e-09
alcohol_overallfreq	rs4275987	A	G	-0.0146289	0.00254032	5.1e-09
alcohol_overallfreq	rs4462754	C	T	-0.0146723	0.00254092	4.7e-09
alcohol_overallfreq	rs9678336	A	G	-0.014623	0.00254148	5.3e-09
alcohol_overallfreq	rs74446114	T	C	0.0227623	0.00273969	5.8e-17
alcohol_overallfreq	rs4564736	A	T	-0.0146317	0.00254026	5e-09
alcohol_overallfreq	rs11901133	T	G	-0.0146343	0.00254019	5e-09
alcohol_overallfreq	rs4555299	A	G	-0.0146483	0.00254	4.8e-09
alcohol_overallfreq	rs4666024	C	G	-0.0146667	0.00254021	4.7e-09
alcohol_overallfreq	rs4583413	C	T	-0.014648	0.00254039	4.9e-09
alcohol_overallfreq	rs4419196	A	G	-0.0146447	0.00254043	4.9e-09
alcohol_overallfreq	rs4447576	T	C	-0.0149471	0.00254777	2.7e-09
alcohol_overallfreq	rs7426295	G	A	-0.0138812	0.00251661	2.1e-08
alcohol_overallfreq	rs4233719	C	A	-0.0138618	0.00251667	2.2e-08
alcohol_overallfreq	rs112530925	T	A	0.0709986	0.0128925	3.5e-08
alcohol_overallfreq	rs7595986	G	A	0.0136994	0.00251265	3.1e-08
alcohol_overallfreq	rs77353560	C	A	0.0220678	0.0027427	5.1e-16
alcohol_overallfreq	rs773635172	T	TAA	-0.0138155	0.00252145	2.6e-08
alcohol_overallfreq	rs1973116	C	T	-0.0137246	0.00251304	2.9e-08
alcohol_overallfreq	rs10171517	T	C	0.014661	0.00252937	3.9e-09
alcohol_overallfreq	rs898034	T	C	0.0146584	0.00252925	4e-09
alcohol_overallfreq	rs2337373	T	C	0.0136942	0.00251269	3.1e-08
alcohol_overallfreq	rs12466717	A	G	0.0136805	0.00251257	3.2e-08
alcohol_overallfreq	rs13411592	G	A	0.0136188	0.00251292	3.7e-08
alcohol_overallfreq	rs112087863	T	C	0.0721169	0.0128265	1.7e-08
alcohol_overallfreq	rs6706209	C	T	0.0138171	0.00251288	2.3e-08
alcohol_overallfreq	rs6547814	G	A	-0.0138681	0.00251355	2.1e-08
alcohol_overallfreq	rs13413962	G	A	0.013781	0.00251331	2.6e-08
alcohol_overallfreq	rs2305929	A	G	0.0220424	0.00274309	5.7e-16
alcohol_overallfreq	2:28122343_GT_G	GT	G	0.0150664	0.00274714	2.4e-08
alcohol_overallfreq	rs17006365	T	G	0.0137522	0.00251342	2.7e-08
alcohol_overallfreq	rs6709765	A	T	0.0137939	0.00251314	2.5e-08
alcohol_overallfreq	rs10177845	G	A	0.0138226	0.00251325	2.4e-08
alcohol_overallfreq	rs10190494	A	G	0.0139058	0.00251287	1.9e-08
alcohol_overallfreq	rs10204488	G	A	0.0136751	0.00254325	4.7e-08
alcohol_overallfreq	rs2016616	A	G	0.013924	0.00251329	1.9e-08
alcohol_overallfreq	rs1458396	A	G	0.0139684	0.00251306	1.7e-08
alcohol_overallfreq	rs111435992	T	G	0.0714442	0.0130818	4.2e-08
alcohol_overallfreq	rs1870325	G	A	0.0137071	0.00254335	4.3e-08
alcohol_overallfreq	rs10194283	G	A	0.0134915	0.0025101	4.6e-08
alcohol_overallfreq	rs10184052	A	G	0.013557	0.00251031	4e-08
alcohol_overallfreq	rs13400398	C	T	0.0135291	0.00251023	4.3e-08
alcohol_overallfreq	rs13416434	T	C	0.0135146	0.00251043	4.4e-08
alcohol_overallfreq	rs4390729	T	C	0.0135524	0.00251033	4.1e-08
alcohol_overallfreq	rs10170872	C	T	0.0135341	0.00251039	4.2e-08
alcohol_overallfreq	rs7577437	A	G	0.0135199	0.00251031	4.4e-08
alcohol_overallfreq	rs7595847	T	A	0.0135179	0.00251036	4.4e-08
alcohol_overallfreq	rs7584462	A	T	0.0135454	0.00251069	4.2e-08
alcohol_overallfreq	rs1506537	G	C	0.0134804	0.00251117	4.9e-08
alcohol_overallfreq	rs1902966	G	A	0.0137063	0.00251105	2.9e-08
alcohol_overallfreq	rs10198257	T	C	0.013686	0.00251498	3.2e-08
alcohol_overallfreq	rs12465000	G	A	0.0135028	0.00251015	4.6e-08
alcohol_overallfreq	rs12465103	G	C	0.0135734	0.00251024	3.9e-08
alcohol_overallfreq	rs2337374	G	A	0.0134911	0.00251018	4.7e-08
alcohol_overallfreq	rs898032	C	G	0.0135153	0.00251022	4.5e-08
alcohol_overallfreq	rs7577342	C	T	0.0136196	0.00251081	3.6e-08
alcohol_overallfreq	rs57333567	G	GTA	0.0150995	0.00247387	4.3e-10
alcohol_overallfreq	rs28662360	A	G	0.013621	0.00251111	3.5e-08
alcohol_overallfreq	rs10209126	C	T	0.0135683	0.00251077	3.9e-08
alcohol_overallfreq	rs10175508	C	T	0.0138798	0.00251296	2.1e-08
alcohol_overallfreq	rs12470614	T	C	0.0138872	0.00251304	2e-08
alcohol_overallfreq	rs1458398	A	G	0.0138327	0.00251275	2.3e-08
alcohol_overallfreq	rs2839791	A	C	0.0137768	0.00251276	2.6e-08
alcohol_overallfreq	rs7602328	G	A	0.0138274	0.00251298	2.3e-08
alcohol_overallfreq	rs6547817	C	T	0.0138079	0.00251278	2.4e-08
alcohol_overallfreq	2:28240219_ATGT_A	ATGT	A	0.0138545	0.00251571	2.2e-08
alcohol_overallfreq	rs4616436	G	A	0.0138851	0.00251283	2e-08
alcohol_overallfreq	rs62140395	G	C	0.0226654	0.00323922	4.5e-12
alcohol_overallfreq	rs62140396	G	A	0.0228721	0.00324127	3e-12
alcohol_overallfreq	rs937812	C	T	0.0138169	0.00251291	2.4e-08
alcohol_overallfreq	rs9309658	A	G	0.0137862	0.00251274	2.5e-08
alcohol_overallfreq	rs7593127	G	A	0.0138084	0.00251288	2.4e-08
alcohol_overallfreq	rs6731650	C	A	0.0137386	0.00251324	2.9e-08
alcohol_overallfreq	rs7580274	C	T	0.0137992	0.00251289	2.5e-08
alcohol_overallfreq	rs6738887	C	T	0.0137796	0.0025129	2.6e-08
alcohol_overallfreq	rs13402420	T	G	0.0137785	0.00251313	2.6e-08
alcohol_overallfreq	rs1395324	C	G	0.0139743	0.00251454	1.7e-08
alcohol_overallfreq	rs6547820	G	A	0.0136877	0.00254165	4.5e-08
alcohol_overallfreq	rs7604640	G	A	-0.0128096	0.00211142	9.5e-10
alcohol_overallfreq	rs4953143	C	G	-0.0127436	0.00211341	1.2e-09
alcohol_overallfreq	rs4143310	C	A	-0.0127456	0.00211161	1.2e-09
alcohol_overallfreq	rs7584428	A	G	-0.0124545	0.00211513	2.9e-09
alcohol_overallfreq	rs512942	G	A	-0.013284	0.00212967	3.2e-10
alcohol_overallfreq	rs528483	C	A	-0.0150575	0.00214289	1.1e-12
alcohol_overallfreq	rs163521	G	A	-0.0136876	0.00212389	8.1e-11
alcohol_overallfreq	rs163522	G	A	-0.0135605	0.00212342	1.1e-10
alcohol_overallfreq	rs340517	T	A	-0.0134556	0.00212451	1.6e-10
alcohol_overallfreq	rs10661063	A	AAAACAAACAAAC	-0.0135108	0.00210584	1.4e-10
alcohol_overallfreq	rs340496	G	C	-0.0155746	0.00209876	6.8e-14
alcohol_overallfreq	rs340497	G	C	-0.0155154	0.00209864	8.3e-14
alcohol_overallfreq	rs340498	A	C	-0.0155592	0.00209927	7.5e-14
alcohol_overallfreq	rs564906	G	C	-0.0154099	0.00209801	1.2e-13
alcohol_overallfreq	rs564207	T	C	-0.0155435	0.00209821	7.4e-14
alcohol_overallfreq	rs544911	A	G	-0.0140406	0.00208789	1.7e-11
alcohol_overallfreq	rs1629802	G	A	-0.0142311	0.00216912	4.3e-11
alcohol_overallfreq	rs539447	A	G	-0.0142413	0.00208668	8.8e-12
alcohol_overallfreq	rs540395	A	C	-0.0141538	0.00213815	2.9e-11
alcohol_overallfreq	rs540606	A	G	-0.015683	0.00209576	4.4e-14
alcohol_overallfreq	rs501964	C	T	-0.0139364	0.00219948	1.6e-10
alcohol_overallfreq	rs567047	A	G	-0.0156298	0.00209502	5.2e-14
alcohol_overallfreq	rs567897	A	G	-0.0144375	0.00213486	1.1e-11
alcohol_overallfreq	rs473098	C	T	-0.0158504	0.00209469	2.2e-14
alcohol_overallfreq	rs472140	C	T	-0.0158591	0.00209464	2.2e-14
alcohol_overallfreq	rs494904	T	C	-0.0142788	0.0021383	1.7e-11
alcohol_overallfreq	rs518853	G	A	-0.015671	0.00209844	5.1e-14
alcohol_overallfreq	rs570436	C	T	-0.015626	0.00209938	6.1e-14
alcohol_overallfreq	rs10653649	C	CCAAG	-0.0155268	0.00210125	9.5e-14
alcohol_overallfreq	rs570305	C	G	-0.0155301	0.00210139	9.3e-14
alcohol_overallfreq	rs578584	A	T	-0.0154534	0.00210033	1.2e-13
alcohol_overallfreq	rs542883	G	C	-0.0155509	0.00210039	8.3e-14
alcohol_overallfreq	rs72794102	C	T	-0.0143472	0.00223119	8.7e-11
alcohol_overallfreq	rs490340	C	T	-0.0152886	0.00209729	1.9e-13
alcohol_overallfreq	rs4953148	A	T	-0.0150201	0.00227948	3.2e-11
alcohol_overallfreq	rs538543	G	C	-0.0148652	0.00222316	1.6e-11
alcohol_overallfreq	rs549814	C	T	-0.014775	0.00222315	2.1e-11
alcohol_overallfreq	rs56077086	G	T	-0.0145532	0.00226907	9.9e-11
alcohol_overallfreq	rs7568987	A	G	-0.0147993	0.00226307	4.4e-11
alcohol_overallfreq	rs7569203	A	C	-0.0151104	0.00225665	1.5e-11
alcohol_overallfreq	rs504764	C	T	-0.0151314	0.00221492	5.9e-12
alcohol_overallfreq	rs504675	C	T	-0.0153628	0.00218568	1.5e-12
alcohol_overallfreq	rs528301	G	A	-0.0152793	0.00209322	1.7e-13
alcohol_overallfreq	rs13383034	C	T	-0.015233	0.00226101	1.1e-11
alcohol_overallfreq	rs13386862	G	A	-0.0150512	0.00225528	1.6e-11
alcohol_overallfreq	rs4953149	T	C	-0.014931	0.00220345	7.6e-12
alcohol_overallfreq	rs4953150	C	T	-0.014924	0.00220346	7.9e-12
alcohol_overallfreq	rs1004787	G	A	-0.0160002	0.00209645	1.4e-14
alcohol_overallfreq	rs733872	G	A	-0.0153563	0.00278188	3.4e-08
alcohol_overallfreq	rs895632	A	C	-0.0133119	0.00209983	1.1e-10
alcohol_overallfreq	rs1561227	C	T	-0.0126153	0.00209419	8.2e-10
alcohol_overallfreq	rs83995	G	T	-0.0135599	0.0021132	6.5e-11
alcohol_overallfreq	rs741813	T	A	-0.0124514	0.00209709	1.5e-09
alcohol_overallfreq	rs4953152	G	A	-0.0154423	0.00225112	5.8e-12
alcohol_overallfreq	rs338070	C	G	-0.0127347	0.00213522	1e-09
alcohol_overallfreq	rs534567	A	G	-0.0125474	0.00212394	1.6e-09
alcohol_overallfreq	rs173076	G	A	-0.0125279	0.00213355	1.9e-09
alcohol_overallfreq	rs10496076	T	C	-0.0126767	0.00216922	3.4e-09
alcohol_overallfreq	rs2125924	T	C	-0.0118682	0.00210069	1.2e-08
alcohol_overallfreq	2:57944288_AGTTG_A	AGTTG	A	-0.0128109	0.00215661	2.2e-09
alcohol_overallfreq	rs747713243	GTTGA	G	-0.0120274	0.00212057	1e-08
alcohol_overallfreq	rs762523673	TA	T	-0.012124	0.0021213	8.4e-09
alcohol_overallfreq	2:57944589_TA_T	TA	T	-0.011793	0.00211219	1.8e-08
alcohol_overallfreq	rs6720888	A	G	-0.0125537	0.00216984	4.8e-09
alcohol_overallfreq	rs13402331	T	C	-0.0126667	0.00216062	2.9e-09
alcohol_overallfreq	rs760021402	A	AG	-0.0117535	0.0021158	1.9e-08
alcohol_overallfreq	rs13418015	A	G	-0.0126334	0.00216106	3.2e-09
alcohol_overallfreq	rs4671319	G	A	-0.0116593	0.00210054	2.1e-08
alcohol_overallfreq	rs10196378	T	G	-0.0125453	0.0021698	4.8e-09
alcohol_overallfreq	rs2290867	A	C	-0.0125711	0.00216069	3.9e-09
alcohol_overallfreq	rs4671320	C	G	-0.0124447	0.00217694	7.2e-09
alcohol_overallfreq	rs10195687	T	G	-0.0125254	0.0021747	5.4e-09
alcohol_overallfreq	rs10186791	G	A	-0.0125265	0.00215996	4.4e-09
alcohol_overallfreq	2:57958740_AT_A	AT	A	-0.0124835	0.00217533	6.1e-09
alcohol_overallfreq	rs6709720	A	G	-0.0123687	0.00216415	6.6e-09
alcohol_overallfreq	rs2125925	A	G	-0.0123775	0.00216199	6.2e-09
alcohol_overallfreq	rs13002041	C	A	-0.0122349	0.00216102	9.2e-09
alcohol_overallfreq	rs3886275	A	C	-0.0121477	0.00216108	1.2e-08
alcohol_overallfreq	rs717817	C	T	-0.0121264	0.00216099	1.2e-08
alcohol_overallfreq	rs7567497	A	T	-0.0121594	0.00216112	1.1e-08
alcohol_overallfreq	rs11125729	T	C	-0.0121651	0.00216128	1.1e-08
alcohol_overallfreq	rs11679364	T	G	-0.0122668	0.00216145	8.5e-09
alcohol_overallfreq	rs34035400	T	TC	-0.0122481	0.00217598	1.1e-08
alcohol_overallfreq	rs10204616	A	T	-0.012256	0.00216109	8.6e-09
alcohol_overallfreq	rs12997222	C	G	-0.0124613	0.00215805	4.8e-09
alcohol_overallfreq	rs11688767	A	T	-0.0112674	0.00208598	4.9e-08
alcohol_overallfreq	rs13032423	G	A	-0.0116672	0.00209628	1.8e-08
alcohol_overallfreq	rs12990792	G	A	-0.0123022	0.00215951	7.3e-09
alcohol_overallfreq	rs10496078	G	A	-0.0122955	0.00216376	7.9e-09
alcohol_overallfreq	rs7561842	C	T	-0.0126728	0.00215753	2.6e-09
alcohol_overallfreq	rs7588492	A	G	-0.0124257	0.00216083	5.3e-09
alcohol_overallfreq	rs10496079	G	C	-0.0125959	0.00215634	3.2e-09
alcohol_overallfreq	rs10865304	G	T	-0.0126901	0.00215465	2.4e-09
alcohol_overallfreq	rs70954867	A	AT	-0.0128966	0.0021604	1.4e-09
alcohol_overallfreq	rs6730037	G	A	-0.0126338	0.00215419	2.8e-09
alcohol_overallfreq	rs11898858	G	A	-0.0126698	0.00215405	2.5e-09
alcohol_overallfreq	2:58006919_GA_G	GA	G	-0.0130612	0.00217621	1.2e-09
alcohol_overallfreq	rs12713358	A	T	-0.0126604	0.00215408	2.6e-09
alcohol_overallfreq	rs6737913	G	A	-0.0126306	0.00215407	2.8e-09
alcohol_overallfreq	rs6756221	T	C	-0.0124289	0.00215782	5e-09
alcohol_overallfreq	rs4296411	A	C	-0.0126168	0.00215404	3e-09
alcohol_overallfreq	rs6761347	T	A	-0.0126631	0.00215387	2.6e-09
alcohol_overallfreq	rs1568450	A	G	-0.01266	0.0021544	2.6e-09
alcohol_overallfreq	rs13026612	C	T	-0.0125424	0.00215318	3.5e-09
alcohol_overallfreq	rs13026830	C	T	-0.0125347	0.00215228	3.5e-09
alcohol_overallfreq	rs10166481	G	A	-0.012724	0.00215371	2.1e-09
alcohol_overallfreq	rs12991325	C	T	-0.0125855	0.00215324	3.1e-09
alcohol_overallfreq	rs11676055	C	T	-0.0126085	0.00215335	2.9e-09
alcohol_overallfreq	rs1589407	T	C	-0.0125833	0.00215434	3.2e-09
alcohol_overallfreq	rs2090793	G	A	-0.0125302	0.00215346	3.7e-09
alcohol_overallfreq	rs4672223	C	A	-0.012684	0.00215371	2.4e-09
alcohol_overallfreq	rs6545663	A	T	-0.0125079	0.00215337	3.9e-09
alcohol_overallfreq	rs6545664	C	T	-0.0125331	0.00215333	3.6e-09
alcohol_overallfreq	rs6545665	G	A	-0.0125354	0.00215346	3.5e-09
alcohol_overallfreq	2:58025739_TA_T	TA	T	-0.0125683	0.00215574	3.3e-09
alcohol_overallfreq	rs2717048	C	T	-0.012505	0.00215379	3.9e-09
alcohol_overallfreq	rs2683614	G	A	-0.0124785	0.00215385	4.2e-09
alcohol_overallfreq	rs954593	C	T	-0.0125772	0.00215426	3.2e-09
alcohol_overallfreq	rs2683615	C	A	-0.0125869	0.0021542	3.1e-09
alcohol_overallfreq	rs2717071	G	A	-0.0125214	0.00215434	3.8e-09
alcohol_overallfreq	rs1474215	C	G	-0.0125002	0.00215465	4e-09
alcohol_overallfreq	rs2717075	G	C	-0.012496	0.00215475	4.1e-09
alcohol_overallfreq	rs2683620	A	T	-0.0125678	0.00215471	3.4e-09
alcohol_overallfreq	rs2683619	C	T	-0.0125541	0.00215488	3.5e-09
alcohol_overallfreq	rs2683618	A	G	-0.0117	0.0020963	1.7e-08
alcohol_overallfreq	rs2717018	C	T	-0.0125789	0.00215477	3.3e-09
alcohol_overallfreq	rs2683616	G	A	-0.0125663	0.00215462	3.4e-09
alcohol_overallfreq	rs2683628	A	G	-0.0125259	0.00215522	3.8e-09
alcohol_overallfreq	rs11433420	T	TA	-0.0127633	0.00217894	3.3e-09
alcohol_overallfreq	rs2683629	A	G	-0.0125274	0.00215532	3.8e-09
alcohol_overallfreq	rs2953439	T	C	-0.0125482	0.00215558	3.6e-09
alcohol_overallfreq	rs2953440	C	T	-0.0123383	0.00215928	7.1e-09
alcohol_overallfreq	rs7598169	C	T	-0.0124716	0.00215589	4.4e-09
alcohol_overallfreq	rs2953441	C	T	-0.0124708	0.00215565	4.4e-09
alcohol_overallfreq	rs1402398	G	A	-0.0124276	0.00215556	5e-09
alcohol_overallfreq	rs2717055	G	A	-0.0125272	0.00215555	3.7e-09
alcohol_overallfreq	rs1402399	T	C	-0.0125481	0.00215579	3.6e-09
alcohol_overallfreq	rs2717054	G	A	-0.0125883	0.00215549	3.2e-09
alcohol_overallfreq	rs2683621	A	G	-0.0125847	0.00215571	3.3e-09
alcohol_overallfreq	rs2717053	G	C	-0.0126422	0.00215566	2.8e-09
alcohol_overallfreq	rs2717052	C	A	-0.0126006	0.00215597	3.1e-09
alcohol_overallfreq	rs534966746	G	GT	-0.0127355	0.0023067	2.2e-08
alcohol_overallfreq	rs2683630	C	G	-0.0124929	0.00215658	4.2e-09
alcohol_overallfreq	rs2947349	C	A	-0.0122667	0.00215821	8.1e-09
alcohol_overallfreq	rs2717076	C	T	-0.0123571	0.0021557	6.4e-09
alcohol_overallfreq	rs2139787	T	G	-0.0126318	0.002312	3e-08
alcohol_overallfreq	rs2716998	T	A	-0.0126387	0.00232271	3.5e-08
alcohol_overallfreq	2:58079389_AT_A	AT	A	-0.0125789	0.00231123	3.5e-08
alcohol_overallfreq	rs11902254	A	C	-0.012561	0.00230926	3.5e-08
alcohol_overallfreq	2:58085697_TA_T	TA	T	-0.0125473	0.00231072	3.7e-08
alcohol_overallfreq	rs2717068	A	C	-0.0118024	0.00213479	2.1e-08
alcohol_overallfreq	rs2717063	C	A	-0.0127328	0.00212267	1.4e-09
alcohol_overallfreq	rs2683634	T	C	-0.0117063	0.00212423	2.4e-08
alcohol_overallfreq	2:58114255_CAT_C	CAT	C	-0.01212	0.00214484	1.8e-08
alcohol_overallfreq	rs781157235	GCTAT	G	-0.0120192	0.00214442	2.4e-08
alcohol_overallfreq	rs2678911	G	C	-0.0120657	0.00214041	2.1e-08
alcohol_overallfreq	rs2683632	T	C	-0.0121037	0.00213808	1.7e-08
alcohol_overallfreq	rs2678913	T	C	-0.0118232	0.00213781	3.7e-08
alcohol_overallfreq	rs2717060	A	G	-0.0118192	0.00213821	3.7e-08
alcohol_overallfreq	rs2678915	C	T	-0.0117645	0.00212515	2.1e-08
alcohol_overallfreq	rs2678916	G	T	-0.0120206	0.00213928	2.2e-08
alcohol_overallfreq	rs2717059	C	G	-0.0119861	0.00213859	2.4e-08
alcohol_overallfreq	rs2678917	T	A	-0.0118564	0.00213824	3.4e-08
alcohol_overallfreq	rs2678918	C	T	-0.0119554	0.00213983	2.7e-08
alcohol_overallfreq	rs1356544	T	C	-0.0116726	0.00212488	2.7e-08
alcohol_overallfreq	rs1356545	T	C	-0.0116941	0.00212498	2.5e-08
alcohol_overallfreq	rs11387884	C	CT	-0.0121919	0.00214038	1.4e-08
alcohol_overallfreq	rs2678922	A	G	-0.0121416	0.00215796	2.2e-08
alcohol_overallfreq	rs2678923	A	C	-0.0121379	0.00215792	2.2e-08
alcohol_overallfreq	rs2717057	C	T	-0.012128	0.00214089	1.7e-08
alcohol_overallfreq	rs2459981	C	A	-0.0121521	0.00214336	1.6e-08
alcohol_overallfreq	rs2717056	C	T	-0.0118962	0.0021244	1.5e-08
alcohol_overallfreq	rs765106764	TA	T	-0.0122492	0.00214342	1.3e-08
alcohol_overallfreq	rs2678908	C	T	-0.0118905	0.00212423	1.5e-08
alcohol_overallfreq	rs2678907	A	G	-0.0123468	0.0021417	9.8e-09
alcohol_overallfreq	rs2678906	T	A	-0.0120037	0.00212383	1.1e-08
alcohol_overallfreq	rs908731	C	G	-0.0120565	0.00212352	9.4e-09
alcohol_overallfreq	rs908730	G	A	-0.0119257	0.00212842	1.5e-08
alcohol_overallfreq	rs867740	T	C	-0.0123633	0.00214115	9.3e-09
alcohol_overallfreq	rs2678905	A	G	-0.0120794	0.00212394	8.9e-09
alcohol_overallfreq	rs2717000	C	G	-0.0123444	0.00214162	9.8e-09
alcohol_overallfreq	rs2717001	C	T	-0.012008	0.00212392	1.1e-08
alcohol_overallfreq	rs2678904	G	T	-0.0120003	0.00212411	1.1e-08
alcohol_overallfreq	rs2678903	A	G	-0.0120087	0.00212336	1.1e-08
alcohol_overallfreq	rs2678902	G	A	-0.0123681	0.0021417	9.1e-09
alcohol_overallfreq	rs2678901	A	G	-0.0120325	0.00212356	1e-08
alcohol_overallfreq	rs1040225	A	G	-0.0120228	0.0021236	1e-08
alcohol_overallfreq	rs1040224	G	C	-0.0120424	0.00212355	9.8e-09
alcohol_overallfreq	rs2678895	A	T	-0.0124028	0.00214204	8.3e-09
alcohol_overallfreq	rs2678881	G	A	-0.012031	0.00212334	1e-08
alcohol_overallfreq	2:58141384_CT_C	CT	C	-0.0128879	0.00216554	3e-09
alcohol_overallfreq	rs2717002	T	G	-0.0120436	0.00212356	9.8e-09
alcohol_overallfreq	rs2717003	A	G	-0.0120596	0.00212425	9.3e-09
alcohol_overallfreq	rs34988462	G	GA	-0.0120845	0.00223595	4.1e-08
alcohol_overallfreq	rs2717004	C	A	-0.0120714	0.00212364	9e-09
alcohol_overallfreq	rs951965	C	A	-0.0124114	0.00214237	8.1e-09
alcohol_overallfreq	rs2717005	A	G	-0.0124104	0.00214269	8.2e-09
alcohol_overallfreq	rs11410659	A	AT	-0.0120937	0.0021247	8.4e-09
alcohol_overallfreq	rs2465804	G	A	-0.012036	0.0021238	9.9e-09
alcohol_overallfreq	rs2465805	C	T	-0.0123284	0.00214293	1e-08
alcohol_overallfreq	rs2717007	G	A	-0.0120381	0.00212382	9.8e-09
alcohol_overallfreq	rs2717008	T	C	-0.0124228	0.00214253	7.8e-09
alcohol_overallfreq	rs10694743	G	GCTAA	-0.012388	0.00211457	3.3e-09
alcohol_overallfreq	rs34967704	G	GT	-0.0133027	0.00221143	2e-09
alcohol_overallfreq	rs2459982	A	C	-0.0120017	0.00212353	1.1e-08
alcohol_overallfreq	rs2717010	A	G	-0.0120369	0.00212405	9.9e-09
alcohol_overallfreq	rs2717011	T	C	-0.0120111	0.0021243	1.1e-08
alcohol_overallfreq	rs2717012	C	A	-0.0124754	0.00214286	6.9e-09
alcohol_overallfreq	rs2717013	G	A	-0.0124646	0.00214259	7e-09
alcohol_overallfreq	rs2678869	A	C	-0.0121121	0.00213709	1e-08
alcohol_overallfreq	rs2678870	T	A	-0.0121266	0.00213679	9.5e-09
alcohol_overallfreq	rs2678871	G	A	-0.0125308	0.00213443	2.9e-09
alcohol_overallfreq	rs200493119	C	CG	-0.0119289	0.00212715	1.3e-08
alcohol_overallfreq	rs540927767	T	TG	-0.0119288	0.00212715	1.3e-08
alcohol_overallfreq	rs2717014	T	C	-0.0120211	0.0021233	1e-08
alcohol_overallfreq	rs2678873	G	A	-0.0120048	0.00212373	1.1e-08
alcohol_overallfreq	rs2678874	T	A	-0.0122615	0.00214743	1.3e-08
alcohol_overallfreq	rs2717015	T	C	-0.0119955	0.00212367	1.1e-08
alcohol_overallfreq	rs2312141	A	T	-0.0119927	0.00212367	1.1e-08
alcohol_overallfreq	rs2312143	G	A	-0.0122119	0.00214787	1.5e-08
alcohol_overallfreq	rs2139054	A	C	-0.0120201	0.00212367	1.1e-08
alcohol_overallfreq	rs2678879	A	G	-0.0117123	0.00212729	2.7e-08
alcohol_overallfreq	rs2678880	C	T	-0.0120279	0.00212305	1e-08
alcohol_overallfreq	rs2678882	T	A	-0.0117678	0.00212695	2.3e-08
alcohol_overallfreq	rs2717019	T	G	-0.0117315	0.00212706	2.5e-08
alcohol_overallfreq	rs2678883	A	G	-0.0117168	0.00212702	2.6e-08
alcohol_overallfreq	rs2717020	T	C	-0.0122951	0.00214746	1.2e-08
alcohol_overallfreq	rs2678885	T	G	-0.0122565	0.00214812	1.4e-08
alcohol_overallfreq	rs2717021	G	A	-0.0122022	0.00214794	1.6e-08
alcohol_overallfreq	rs2717022	G	C	-0.0116834	0.00212706	2.9e-08
alcohol_overallfreq	rs34738965	G	GT	-0.0120274	0.00213466	1.2e-08
alcohol_overallfreq	rs2678886	A	G	-0.0117085	0.00212726	2.7e-08
alcohol_overallfreq	rs2717023	C	T	-0.0117627	0.00212725	2.3e-08
alcohol_overallfreq	rs2717024	C	G	-0.0117424	0.00212729	2.4e-08
alcohol_overallfreq	rs2678887	C	A	-0.0117586	0.00212672	2.3e-08
alcohol_overallfreq	rs2678888	A	G	-0.0116686	0.00212698	3e-08
alcohol_overallfreq	rs2717025	G	T	-0.0122333	0.00214875	1.5e-08
alcohol_overallfreq	rs2717026	A	G	-0.0122381	0.00214876	1.5e-08
alcohol_overallfreq	rs2678889	A	G	-0.0116911	0.00212636	2.8e-08
alcohol_overallfreq	rs2678890	C	T	-0.0118044	0.00212536	2e-08
alcohol_overallfreq	rs2717029	G	T	-0.0122362	0.00214795	1.4e-08
alcohol_overallfreq	rs2717030	T	C	-0.0122201	0.0021478	1.5e-08
alcohol_overallfreq	2:58165967_TTC_T	TTC	T	-0.0116942	0.00212735	2.7e-08
alcohol_overallfreq	rs970941	G	A	-0.0117161	0.00212644	2.6e-08
alcohol_overallfreq	rs2717031	T	C	-0.0116966	0.00212653	2.8e-08
alcohol_overallfreq	rs2678891	T	G	-0.0117329	0.00212667	2.5e-08
alcohol_overallfreq	rs2717032	T	C	-0.0117493	0.00212965	2.4e-08
alcohol_overallfreq	rs2717033	T	C	-0.011758	0.00212992	2.4e-08
alcohol_overallfreq	rs2678893	A	G	-0.0116748	0.00214072	3.6e-08
alcohol_overallfreq	2:58167698_GA_G	GA	G	-0.0115558	0.0021298	4.1e-08
alcohol_overallfreq	rs2717036	T	C	-0.0116643	0.00212752	3e-08
alcohol_overallfreq	rs2717038	A	G	-0.0119874	0.00215021	2.9e-08
alcohol_overallfreq	rs2717039	G	T	-0.0121266	0.00215	2e-08
alcohol_overallfreq	rs2678897	G	A	-0.0116593	0.00213779	3.5e-08
alcohol_overallfreq	rs35185782	T	TG	-0.0120132	0.00215153	2.8e-08
alcohol_overallfreq	rs1568253	T	C	-0.011708	0.00212818	2.7e-08
alcohol_overallfreq	rs1568254	C	A	-0.0117223	0.00212814	2.6e-08
alcohol_overallfreq	rs2678898	T	C	-0.0119811	0.00215041	2.9e-08
alcohol_overallfreq	rs2717041	C	T	-0.0118811	0.00212128	1.5e-08
alcohol_overallfreq	rs2678900	T	G	-0.0121995	0.0021084	7.4e-09
alcohol_overallfreq	rs2030237	A	G	-0.0122842	0.00211666	6.7e-09
alcohol_overallfreq	rs10172295	G	A	-0.011856	0.0021177	2.2e-08
alcohol_overallfreq	rs4672226	C	T	-0.0116912	0.0021197	3.7e-08
alcohol_overallfreq	rs6717480	C	A	-0.0118962	0.00211626	2e-08
alcohol_overallfreq	rs4241258	C	T	0.0173541	0.00303033	1.2e-08
alcohol_overallfreq	rs35259799	T	C	0.0176904	0.00316507	2.6e-08
alcohol_overallfreq	rs13390019	T	C	0.0193214	0.0031023	8.3e-10
alcohol_overallfreq	rs756585387	TCCTGATAAGACCA	T	0.0144603	0.00257552	2.6e-08
alcohol_overallfreq	rs7573334	T	C	0.0146458	0.00257115	1.7e-08
alcohol_overallfreq	rs7573583	T	C	0.0146152	0.00257063	1.8e-08
alcohol_overallfreq	rs7559715	C	T	0.0146419	0.00257072	1.7e-08
alcohol_overallfreq	rs72946169	A	C	0.0146629	0.00257059	1.6e-08
alcohol_overallfreq	rs17648502	A	G	0.0146583	0.00257036	1.6e-08
alcohol_overallfreq	rs56951837	G	C	0.0146546	0.00257027	1.6e-08
alcohol_overallfreq	rs7566603	C	G	0.0146219	0.00257024	1.7e-08
alcohol_overallfreq	rs7566686	C	T	0.0146207	0.00256997	1.7e-08
alcohol_overallfreq	rs1551287	C	T	-0.0145476	0.00256947	2e-08
alcohol_overallfreq	rs111443735	C	CTGTT	-0.0143212	0.00256311	3e-08
alcohol_overallfreq	rs1973044	C	T	-0.0144913	0.00256975	2.3e-08
alcohol_overallfreq	rs1973045	G	C	-0.0145394	0.00256932	2e-08
alcohol_overallfreq	rs2167904	A	G	-0.0145369	0.00256908	2e-08
alcohol_overallfreq	rs2123644	A	G	-0.0145758	0.00257022	1.9e-08
alcohol_overallfreq	rs2123645	C	T	-0.0145812	0.00257003	1.9e-08
alcohol_overallfreq	rs2706163	T	G	-0.0145474	0.0025693	2e-08
alcohol_overallfreq	rs2706162	C	T	-0.0145385	0.00256904	2e-08
alcohol_overallfreq	rs1551288	A	G	-0.0145386	0.00256902	2e-08
alcohol_overallfreq	rs1551289	G	A	-0.0144249	0.00256878	2.6e-08
alcohol_overallfreq	rs1551290	G	T	-0.0145362	0.00256898	2.1e-08
alcohol_overallfreq	rs5836601	C	CTTT	-0.0144001	0.00254777	2e-08
alcohol_overallfreq	rs1973046	G	T	-0.0145537	0.00256918	2e-08
alcohol_overallfreq	2:178155703_TTTTC_T	TTTTC	T	0.0145264	0.00259059	2.6e-08
alcohol_overallfreq	rs538158259	CTTTT	C	0.0148418	0.00267062	3.6e-08
alcohol_overallfreq	rs2706160	C	G	-0.014541	0.00256916	2e-08
alcohol_overallfreq	rs2464655	T	G	-0.0144841	0.00257007	2.4e-08
alcohol_overallfreq	rs2706158	A	G	-0.0144322	0.00257246	2.7e-08
alcohol_overallfreq	rs2706157	G	A	-0.0144843	0.00257023	2.4e-08
alcohol_overallfreq	rs2706156	G	A	-0.0145283	0.00257128	2.2e-08
alcohol_overallfreq	rs2444564	A	G	-0.0144822	0.00257025	2.4e-08
alcohol_overallfreq	rs2706155	A	G	-0.014482	0.00257051	2.4e-08
alcohol_overallfreq	rs2706154	C	T	-0.0144605	0.00257052	2.5e-08
alcohol_overallfreq	rs2706153	G	C	-0.0144583	0.00257061	2.5e-08
alcohol_overallfreq	rs2706150	T	A	-0.0144326	0.00257059	2.6e-08
alcohol_overallfreq	rs2602527	A	C	-0.0144444	0.0025706	2.6e-08
alcohol_overallfreq	rs1466208	G	A	-0.0144447	0.00257056	2.5e-08
alcohol_overallfreq	rs2706147	T	G	-0.0144739	0.00257148	2.4e-08
alcohol_overallfreq	rs2444563	C	T	-0.0144039	0.00256582	2.7e-08
alcohol_overallfreq	rs2706146	T	G	-0.0144632	0.00257072	2.4e-08
alcohol_overallfreq	rs2602528	C	T	-0.0144793	0.00257079	2.3e-08
alcohol_overallfreq	rs2706145	A	C	-0.0144391	0.00257075	2.6e-08
alcohol_overallfreq	rs952034	A	G	-0.0144632	0.00257072	2.4e-08
alcohol_overallfreq	rs2602529	A	T	-0.0145418	0.00256945	2e-08
alcohol_overallfreq	rs2464654	C	T	-0.0144487	0.00256603	2.3e-08
alcohol_overallfreq	rs1597957	C	T	-0.0145701	0.00256953	1.8e-08
alcohol_overallfreq	rs1597959	C	T	-0.0145577	0.00256935	1.8e-08
alcohol_overallfreq	rs2706144	T	C	-0.0145186	0.00257047	2.1e-08
alcohol_overallfreq	rs1463287	G	T	-0.0145036	0.00257044	2.2e-08
alcohol_overallfreq	rs1463288	G	C	-0.0145187	0.00257047	2.1e-08
alcohol_overallfreq	rs1901828	T	C	-0.0145187	0.00257048	2.1e-08
alcohol_overallfreq	rs2706143	G	C	-0.0145174	0.00257054	2.1e-08
alcohol_overallfreq	rs10497510	A	G	-0.0144796	0.00257136	2.3e-08
alcohol_overallfreq	rs1377491	A	T	-0.0146666	0.00257201	1.5e-08
alcohol_overallfreq	rs551803509	A	AAAAG	-0.0135593	0.00243302	2.4e-08
alcohol_overallfreq	rs6433661	A	G	-0.0145902	0.00257207	1.8e-08
alcohol_overallfreq	rs1453376	T	C	-0.0145285	0.00257159	2e-08
alcohol_overallfreq	rs6719278	C	T	-0.0144877	0.00257167	2.2e-08
alcohol_overallfreq	rs1869357	C	T	-0.0146062	0.00257259	1.7e-08
alcohol_overallfreq	rs7588444	T	C	-0.014605	0.00257313	1.7e-08
alcohol_overallfreq	rs11889478	C	A	-0.0145892	0.00257345	1.8e-08
alcohol_overallfreq	rs6433662	G	A	-0.0145784	0.00257282	1.9e-08
alcohol_overallfreq	rs6732113	C	T	-0.0145772	0.00257283	1.9e-08
alcohol_overallfreq	rs6732256	C	T	-0.0145758	0.00257283	1.9e-08
alcohol_overallfreq	rs10196915	T	C	-0.0145562	0.00257293	2e-08
alcohol_overallfreq	rs59979824	C	A	0.0130534	0.00220135	3.5e-09
alcohol_overallfreq	rs12619354	T	C	0.0124409	0.00218171	1.4e-08
alcohol_overallfreq	rs4309518	G	A	-0.0117662	0.00208851	2.2e-08
alcohol_overallfreq	rs6750325	G	T	-0.0116901	0.00209805	2.9e-08
alcohol_overallfreq	rs34015451	G	A	0.0113657	0.0020894	4.3e-08
alcohol_overallfreq	rs35775374	A	C	0.0113569	0.00208925	4.4e-08
alcohol_overallfreq	rs67465824	T	G	0.0113771	0.00209374	4.3e-08
alcohol_overallfreq	rs113441738	TAC	T	0.0125683	0.00225731	2.9e-08
alcohol_overallfreq	rs10188314	C	T	-0.0117657	0.00208842	1.8e-08
alcohol_overallfreq	rs4480977	T	G	-0.0115536	0.00208901	3.2e-08
alcohol_overallfreq	rs113784412	C	T	0.0120679	0.00225529	4.7e-08
alcohol_overallfreq	rs4135294	G	A	-0.0161401	0.00296311	4.6e-08
alcohol_overallfreq	rs79834959	A	G	-0.0115625	0.00211407	4.9e-08
alcohol_overallfreq	rs13079145	T	G	-0.0116761	0.00210151	3.2e-08
alcohol_overallfreq	rs13097628	T	C	-0.0115545	0.00210001	4.4e-08
alcohol_overallfreq	rs4679053	G	T	-0.0115346	0.00209978	4.6e-08
alcohol_overallfreq	rs7373828	A	G	-0.0115527	0.00210115	4.6e-08
alcohol_overallfreq	rs7372849	G	C	-0.0115514	0.00210114	4.6e-08
alcohol_overallfreq	rs7642472	T	C	-0.0115353	0.00209994	4.6e-08
alcohol_overallfreq	rs7640050	A	C	-0.0115096	0.00209987	4.9e-08
alcohol_overallfreq	rs928813	G	T	-0.0115177	0.00210024	4.9e-08
alcohol_overallfreq	rs4679060	T	C	0.0115468	0.00210112	4.6e-08
alcohol_overallfreq	rs1984312	G	T	0.0118086	0.00210136	2.3e-08
alcohol_overallfreq	rs2300668	A	G	0.0118124	0.0021017	2.3e-08
alcohol_overallfreq	rs9877282	A	G	0.0118465	0.00210165	2.1e-08
alcohol_overallfreq	rs6599206	C	T	0.0118891	0.00210213	1.9e-08
alcohol_overallfreq	rs11452712	C	CA	0.0117751	0.00210632	2.7e-08
alcohol_overallfreq	rs7630012	A	G	0.0121156	0.00210034	9.6e-09
alcohol_overallfreq	rs2154778	C	T	0.0121032	0.00210078	1e-08
alcohol_overallfreq	rs11273215	A	ATGGAATATGTTTT	0.0121649	0.00211206	9.8e-09
alcohol_overallfreq	rs2284819	T	C	0.0121138	0.00210031	9.7e-09
alcohol_overallfreq	rs6805386	T	C	0.0121036	0.00210028	9.9e-09
alcohol_overallfreq	rs6599209	A	G	0.0121035	0.00210028	9.9e-09
alcohol_overallfreq	rs6599212	T	C	0.012104	0.00210028	9.9e-09
alcohol_overallfreq	rs2051215	A	G	0.0121013	0.00210048	1e-08
alcohol_overallfreq	rs2051216	C	T	0.0120592	0.00210058	1.1e-08
alcohol_overallfreq	rs2284820	C	T	0.0120587	0.00210058	1.2e-08
alcohol_overallfreq	rs1065800	G	A	0.0120273	0.00210071	1.3e-08
alcohol_overallfreq	rs6796845	C	A	0.0120603	0.00210059	1.1e-08
alcohol_overallfreq	rs3762791	T	C	0.0120269	0.00210065	1.3e-08
alcohol_overallfreq	rs9829192	G	T	0.0121041	0.00210079	1e-08
alcohol_overallfreq	rs6802071	C	T	0.01183	0.00210951	2.4e-08
alcohol_overallfreq	rs6792762	G	A	0.0119528	0.00212561	2.3e-08
alcohol_overallfreq	rs141063524	A	T	0.0400997	0.0073076	2.9e-08
alcohol_overallfreq	rs76398786	C	T	0.0289186	0.00494042	2.1e-09
alcohol_overallfreq	rs144519232	C	G	0.0249194	0.00375746	1.6e-11
alcohol_overallfreq	rs75411336	C	T	0.0311594	0.00472085	1.8e-11
alcohol_overallfreq	rs140502640	C	T	0.0321707	0.00493824	3.4e-11
alcohol_overallfreq	rs186086318	G	A	0.0317226	0.00471073	7.1e-12
alcohol_overallfreq	rs138412093	G	C	0.031733	0.00470964	6.9e-12
alcohol_overallfreq	rs188146975	G	A	0.0255344	0.00375735	4.6e-12
alcohol_overallfreq	rs34221642	A	C	0.0299858	0.00463165	5e-11
alcohol_overallfreq	rs111674320	T	C	0.0314752	0.00469504	8.6e-12
alcohol_overallfreq	rs76082653	C	T	0.0320546	0.00472655	4.8e-12
alcohol_overallfreq	rs111494817	T	C	0.024175	0.00367457	2.1e-11
alcohol_overallfreq	rs137920315	A	C	0.0328471	0.00493811	1.5e-11
alcohol_overallfreq	rs113011189	C	T	0.0260073	0.00375381	1.8e-12
alcohol_overallfreq	rs574495606	G	GTCAGAAATTCTTT	0.0355322	0.00543866	3.1e-11
alcohol_overallfreq	rs112978264	T	C	0.0339292	0.00524968	5.8e-11
alcohol_overallfreq	rs74473238	C	G	0.0251148	0.00379336	1.5e-11
alcohol_overallfreq	rs76194913	G	C	0.0247427	0.00369515	8.5e-12
alcohol_overallfreq	rs71324982	G	A	0.013555	0.00250736	3e-08
alcohol_overallfreq	rs79581555	G	A	0.0313367	0.00476638	2.3e-11
alcohol_overallfreq	rs115506546	A	G	0.0298793	0.00489185	5.1e-10
alcohol_overallfreq	rs7629936	G	A	0.0136221	0.00249214	2.1e-08
alcohol_overallfreq	rs60198058	G	A	0.0139363	0.00245614	5.7e-09
alcohol_overallfreq	rs2681780	C	T	0.0131352	0.0022455	2.9e-09
alcohol_overallfreq	rs2777888	A	G	0.0131488	0.00224541	2.8e-09
alcohol_overallfreq	rs2681781	A	G	0.0131529	0.0022453	2.8e-09
alcohol_overallfreq	rs3796386	G	A	0.0133904	0.00221287	6.3e-10
alcohol_overallfreq	rs11130222	A	T	0.0134033	0.00221314	6.4e-10
alcohol_overallfreq	rs2883059	T	C	0.0134506	0.00221302	5.5e-10
alcohol_overallfreq	rs9821675	A	G	0.0129371	0.00224488	5e-09
alcohol_overallfreq	rs6446187	C	A	0.0134129	0.00224545	1.3e-09
alcohol_overallfreq	rs952594	G	A	0.0132691	0.00221374	9.2e-10
alcohol_overallfreq	rs1317154	T	C	0.0130233	0.00224553	4e-09
alcohol_overallfreq	rs55692411	G	A	0.0132205	0.0022138	1.1e-09
alcohol_overallfreq	rs34654589	C	G	0.0131953	0.002214	1.2e-09
alcohol_overallfreq	rs36022378	T	C	0.0147575	0.00266371	1.8e-08
alcohol_overallfreq	rs7613360	C	T	0.0125104	0.00224561	1.3e-08
alcohol_overallfreq	3:49920123_TTTAAA_T	TTTAAA	T	0.0305852	0.00478794	8.9e-11
alcohol_overallfreq	rs9843653	T	C	0.0131537	0.00224728	2.9e-09
alcohol_overallfreq	rs11713193	G	A	0.0134659	0.00224254	1.1e-09
alcohol_overallfreq	rs1062633	T	C	0.0134458	0.00224329	1.1e-09
alcohol_overallfreq	rs11714324	C	T	0.0152144	0.00279894	3.4e-08
alcohol_overallfreq	rs7627864	C	G	0.0134546	0.00220845	5.2e-10
alcohol_overallfreq	rs6795703	C	T	0.0135397	0.00224389	9.3e-10
alcohol_overallfreq	rs111873781	C	T	0.0206769	0.0034054	5.4e-10
alcohol_overallfreq	rs9815930	A	T	0.0138332	0.00226856	5.9e-10
alcohol_overallfreq	rs2230590	T	C	0.0134466	0.0022433	1.2e-09
alcohol_overallfreq	rs11130224	T	A	0.0135437	0.00224255	9.1e-10
alcohol_overallfreq	rs7615206	T	C	0.0134665	0.00220831	5.1e-10
alcohol_overallfreq	rs3774758	C	G	0.0134402	0.00224215	1.2e-09
alcohol_overallfreq	rs3774759	G	T	0.0134503	0.00220842	5.3e-10
alcohol_overallfreq	rs3733134	C	T	0.0134601	0.00220833	5.1e-10
alcohol_overallfreq	rs3733135	G	A	0.0134294	0.00224228	1.2e-09
alcohol_overallfreq	rs2280406	G	A	0.0130371	0.00224298	4.1e-09
alcohol_overallfreq	rs2352984	T	C	0.013241	0.00220754	9.5e-10
alcohol_overallfreq	rs868891	A	G	0.0132134	0.00220765	1e-09
alcohol_overallfreq	rs7634084	A	T	0.0134649	0.00224233	1.1e-09
alcohol_overallfreq	rs9848497	T	C	0.0133589	0.00224217	1.5e-09
alcohol_overallfreq	rs150628303	A	G	0.0292142	0.00469528	2.8e-10
alcohol_overallfreq	rs11709573	C	T	0.0132329	0.00220762	9.8e-10
alcohol_overallfreq	rs781553252	C	CA	0.0162316	0.00281073	3.8e-09
alcohol_overallfreq	3:49959071_CT_C	CT	C	0.0129879	0.00234618	1.5e-08
alcohol_overallfreq	rs35275715	A	G	0.0130686	0.00221247	1.7e-09
alcohol_overallfreq	rs34034116	C	A	0.0130413	0.00221305	1.8e-09
alcohol_overallfreq	3:49959570_CA_C	CA	C	0.0136149	0.00227058	1.2e-09
alcohol_overallfreq	rs62262093	T	C	0.0135371	0.00224277	9.2e-10
alcohol_overallfreq	rs6774354	G	A	0.0133551	0.0022082	7e-10
alcohol_overallfreq	rs6771546	T	C	0.013541	0.00224689	9.4e-10
alcohol_overallfreq	rs7613875	C	A	0.0135106	0.00223612	8.5e-10
alcohol_overallfreq	rs7627910	T	C	0.0130167	0.00217933	1.1e-09
alcohol_overallfreq	3:49971887_GA_G	GA	G	0.0144577	0.00235448	4.6e-10
alcohol_overallfreq	rs55751738	A	G	0.0135785	0.00224689	8.4e-10
alcohol_overallfreq	3:49972415_AGGCCTAG_A	AGGCCTAG	A	0.0135563	0.002248	9.1e-10
alcohol_overallfreq	rs7621026	A	G	0.013577	0.00224692	8.5e-10
alcohol_overallfreq	rs7609971	C	T	0.0135997	0.00224692	8e-10
alcohol_overallfreq	rs7626952	A	G	0.0129986	0.00224194	3.2e-09
alcohol_overallfreq	rs6772095	C	T	0.0135778	0.00224688	8.5e-10
alcohol_overallfreq	rs71631037	C	CA	0.0134627	0.00236916	8e-09
alcohol_overallfreq	3:49981907_CTT_C	CTT	C	0.0130615	0.0022033	1.5e-09
alcohol_overallfreq	rs767112646	A	ATT	0.0179162	0.00281932	1.1e-10
alcohol_overallfreq	rs11721204	C	T	0.0127448	0.00220139	3.4e-09
alcohol_overallfreq	rs72942333	T	C	0.0135719	0.00224679	8.6e-10
alcohol_overallfreq	rs11706185	G	A	0.0131379	0.00219423	9.9e-10
alcohol_overallfreq	rs7635002	T	G	0.0135524	0.00224818	9.4e-10
alcohol_overallfreq	3:49989935_GT_G	GT	G	0.0137318	0.00231821	1.9e-09
alcohol_overallfreq	rs71080562	C	CT	0.0135199	0.0022468	9.8e-10
alcohol_overallfreq	rs11709503	G	T	0.0131471	0.00219424	9.8e-10
alcohol_overallfreq	3:49992778_AT_A	AT	A	0.0135308	0.00224814	9.8e-10
alcohol_overallfreq	rs11130226	T	G	0.0135767	0.00224684	8.4e-10
alcohol_overallfreq	rs11130227	A	G	0.0135159	0.00227875	1.9e-09
alcohol_overallfreq	rs367565471	C	CT	0.0136023	0.00236266	5.3e-09
alcohol_overallfreq	rs6792892	T	C	0.0135553	0.002247	9.2e-10
alcohol_overallfreq	rs6780522	C	A	0.0135956	0.00225403	8.9e-10
alcohol_overallfreq	rs13077403	G	A	0.0131065	0.00219433	1.1e-09
alcohol_overallfreq	rs13079006	G	T	0.0131207	0.00219434	1.1e-09
alcohol_overallfreq	rs2624844	T	C	0.0135499	0.00224789	9.2e-10
alcohol_overallfreq	rs2624843	G	A	0.0135783	0.00224683	8.4e-10
alcohol_overallfreq	rs2883057	C	T	0.0135963	0.00224682	8.1e-10
alcohol_overallfreq	rs62262114	G	A	0.0131063	0.00219432	1.1e-09
alcohol_overallfreq	3:49999583_TA_T	TA	T	0.0128623	0.00226449	7.2e-09
alcohol_overallfreq	rs12496973	T	C	0.0135783	0.00224689	8.4e-10
alcohol_overallfreq	rs11130228	C	T	0.0135783	0.00224689	8.4e-10
alcohol_overallfreq	rs2252833	G	A	0.0135779	0.00224683	8.5e-10
alcohol_overallfreq	rs34699382	C	CT	0.0135936	0.00230187	1.9e-09
alcohol_overallfreq	rs6446189	A	G	0.0135722	0.00224678	8.6e-10
alcohol_overallfreq	rs7648174	C	T	0.0130786	0.00219422	1.2e-09
alcohol_overallfreq	rs35065728	T	C	0.0135798	0.00224687	8.4e-10
alcohol_overallfreq	rs2624819	G	T	0.0131398	0.00219463	9.9e-10
alcohol_overallfreq	rs2681778	T	C	0.0135802	0.00224693	8.4e-10
alcohol_overallfreq	3:50011319_TTTTG_T	TTTTG	T	0.0130785	0.00219986	1.3e-09
alcohol_overallfreq	rs11130229	T	C	0.013576	0.00224684	8.5e-10
alcohol_overallfreq	rs6780731	A	G	0.0135766	0.00224688	8.5e-10
alcohol_overallfreq	rs11130233	T	G	0.0135581	0.0022469	8.9e-10
alcohol_overallfreq	rs2681776	G	A	0.0130881	0.00219437	1.2e-09
alcohol_overallfreq	3:50020448_AT_A	AT	A	0.0358736	0.00549265	4.1e-11
alcohol_overallfreq	rs62262139	G	A	0.0133601	0.00228527	3e-09
alcohol_overallfreq	rs62262140	G	A	0.0135122	0.0022957	2.5e-09
alcohol_overallfreq	rs62262141	G	A	0.0139913	0.00226955	4e-10
alcohol_overallfreq	rs139738301	G	A	0.0139341	0.00227028	4.7e-10
alcohol_overallfreq	rs138397226	G	A	0.013486	0.00225247	1.2e-09
alcohol_overallfreq	rs149445151	G	A	0.013531	0.00232437	3.8e-09
alcohol_overallfreq	rs76367790	G	A	0.0140584	0.00227772	3.7e-10
alcohol_overallfreq	rs199956414	G	A	0.013794	0.00226932	6.7e-10
alcohol_overallfreq	rs2681775	G	A	0.01381	0.00227101	6.7e-10
alcohol_overallfreq	rs4688690	G	A	0.0135978	0.00224687	8e-10
alcohol_overallfreq	rs9853222	T	C	0.0135754	0.00224683	8.5e-10
alcohol_overallfreq	rs778801698	CA	C	0.0138291	0.0023409	2e-09
alcohol_overallfreq	rs111439884	A	C	0.0134108	0.00226683	1.9e-09
alcohol_overallfreq	rs11130234	G	T	0.0135889	0.00224686	8.2e-10
alcohol_overallfreq	rs13082703	T	C	0.0131057	0.00219472	1.1e-09
alcohol_overallfreq	rs13060128	A	G	0.0135793	0.00224733	8.5e-10
alcohol_overallfreq	rs12485600	A	G	0.0135518	0.00224728	9.2e-10
alcohol_overallfreq	rs34080578	A	C	0.0135726	0.00224727	8.7e-10
alcohol_overallfreq	3:50026388_GA_G	GA	G	0.0131168	0.00219441	1.1e-09
alcohol_overallfreq	rs2353579	C	T	0.013565	0.0022473	8.8e-10
alcohol_overallfreq	rs4688758	G	A	0.013583	0.00224727	8.4e-10
alcohol_overallfreq	rs2624832	C	T	0.0131021	0.00219432	1.1e-09
alcohol_overallfreq	rs17657664	T	G	0.0131454	0.00219425	9.8e-10
alcohol_overallfreq	rs148704782	G	GGGGTGTGTGTGT	0.0164458	0.00295638	1.5e-08
alcohol_overallfreq	rs34312088	C	T	0.0130943	0.00219814	1.2e-09
alcohol_overallfreq	3:50032699_TA_T	TA	T	0.0135567	0.0022468	9e-10
alcohol_overallfreq	rs17657688	T	C	0.0131354	0.00219423	1e-09
alcohol_overallfreq	rs4688757	T	C	0.0135732	0.00224674	8.6e-10
alcohol_overallfreq	rs4688689	C	T	0.0135942	0.00224679	8.1e-10
alcohol_overallfreq	rs3774733	C	G	0.0135982	0.00224683	8e-10
alcohol_overallfreq	rs796623870	GA	G	0.0142883	0.0023646	8.8e-10
alcohol_overallfreq	rs6767381	A	G	0.0135977	0.00224683	8e-10
alcohol_overallfreq	rs11925192	G	A	0.0135856	0.0022471	8.4e-10
alcohol_overallfreq	rs7628058	G	A	0.0135764	0.00224679	8.5e-10
alcohol_overallfreq	rs4688756	T	A	0.0135821	0.00224679	8.5e-10
alcohol_overallfreq	rs6765484	C	T	-0.0136681	0.00225073	7e-10
alcohol_overallfreq	rs558762233	C	CT	-0.0131608	0.00219859	9.8e-10
alcohol_overallfreq	rs12634780	A	T	-0.0132345	0.00219906	8.1e-10
alcohol_overallfreq	rs9812936	C	T	-0.0132006	0.00219913	9.1e-10
alcohol_overallfreq	rs2353586	G	T	-0.0135531	0.00224746	9.1e-10
alcohol_overallfreq	rs2353587	G	A	-0.0135737	0.00224757	8.6e-10
alcohol_overallfreq	rs9881008	C	T	-0.0135541	0.00224685	9e-10
alcohol_overallfreq	rs7634917	T	G	-0.0135592	0.00224671	8.9e-10
alcohol_overallfreq	rs7645466	G	T	-0.0131037	0.00219416	1.1e-09
alcohol_overallfreq	rs6446190	C	G	-0.0135327	0.00224677	9.5e-10
alcohol_overallfreq	rs6446191	T	C	-0.0131037	0.00219416	1.1e-09
alcohol_overallfreq	rs6446192	T	C	-0.0131008	0.00219416	1.1e-09
alcohol_overallfreq	3:50053937_GT_G	GT	G	-0.0135678	0.00227076	1.3e-09
alcohol_overallfreq	rs528006741	T	TG	-0.0125638	0.00232042	3.7e-08
alcohol_overallfreq	rs9861216	T	C	-0.0135738	0.00224681	8.6e-10
alcohol_overallfreq	rs6446193	T	C	-0.0135739	0.00224681	8.6e-10
alcohol_overallfreq	rs7650214	T	C	-0.0135707	0.00224676	8.6e-10
alcohol_overallfreq	rs11713562	G	C	-0.0135557	0.00224677	8.9e-10
alcohol_overallfreq	rs2624845	C	A	-0.0130715	0.00219422	1.2e-09
alcohol_overallfreq	rs4688755	G	A	-0.0135433	0.00224672	9.2e-10
alcohol_overallfreq	rs2526751	T	C	-0.0135618	0.00224677	8.8e-10
alcohol_overallfreq	rs6446194	T	A	-0.0131103	0.00219414	1.1e-09
alcohol_overallfreq	3:50067719_TAAAAA_T	TAAAAA	T	-0.0131629	0.00219413	9.3e-10
alcohol_overallfreq	rs9866695	G	T	-0.0135417	0.00224671	9.2e-10
alcohol_overallfreq	rs2526750	A	G	-0.0131061	0.00219421	1.1e-09
alcohol_overallfreq	rs7621352	A	C	-0.0135261	0.00224667	9.8e-10
alcohol_overallfreq	rs6446195	A	G	-0.0130781	0.00219427	1.2e-09
alcohol_overallfreq	rs7624030	A	C	-0.0131331	0.00219531	1.1e-09
alcohol_overallfreq	rs371444478	CT	C	-0.0129373	0.00231927	1.5e-08
alcohol_overallfreq	rs7634441	G	A	-0.0131105	0.00219423	1.1e-09
alcohol_overallfreq	rs9844201	A	C	-0.0130801	0.0021943	1.2e-09
alcohol_overallfreq	rs147033921	C	CCCTCTCCTCT	-0.0135362	0.00224699	9.5e-10
alcohol_overallfreq	rs12488521	T	C	-0.0130799	0.00219427	1.2e-09
alcohol_overallfreq	rs66851636	C	T	-0.0135265	0.00224677	9.7e-10
alcohol_overallfreq	rs4688754	G	T	-0.0130941	0.00219429	1.1e-09
alcohol_overallfreq	rs4688753	A	G	-0.0131044	0.00219425	1.1e-09
alcohol_overallfreq	rs112634398	A	G	0.0338197	0.00522368	5.1e-11
alcohol_overallfreq	3:50076535_GA_G	GA	G	-0.0131119	0.00219423	1.1e-09
alcohol_overallfreq	rs2526749	A	G	-0.0130972	0.00219425	1.1e-09
alcohol_overallfreq	rs9810125	G	A	-0.0135411	0.00224687	9.3e-10
alcohol_overallfreq	rs7430334	T	C	-0.0131087	0.00219425	1.1e-09
alcohol_overallfreq	rs9814664	C	T	-0.013549	0.0022468	9.2e-10
alcohol_overallfreq	rs2526748	A	G	-0.0135513	0.00224677	9.2e-10
alcohol_overallfreq	rs11434039	C	CA	-0.0133237	0.00229418	3.2e-09
alcohol_overallfreq	rs9682295	T	C	-0.0130899	0.00219431	1.2e-09
alcohol_overallfreq	3:50081314_CT_C	CT	C	-0.0140753	0.00240331	3.1e-09
alcohol_overallfreq	rs2526747	C	G	-0.0128454	0.00219922	2.8e-09
alcohol_overallfreq	rs573052747	C	CACTAT	-0.0128805	0.00220133	2.6e-09
alcohol_overallfreq	rs10663354	A	ACTAT	-0.0128657	0.00219963	2.7e-09
alcohol_overallfreq	rs2624824	T	C	-0.0132719	0.00225008	2.4e-09
alcohol_overallfreq	rs6446197	A	G	-0.0128697	0.00219913	2.6e-09
alcohol_overallfreq	rs2624823	G	T	-0.0132639	0.00225003	2.4e-09
alcohol_overallfreq	rs9311446	G	A	-0.0135553	0.00224678	9.1e-10
alcohol_overallfreq	rs6762477	G	A	-0.0130879	0.00219432	1.2e-09
alcohol_overallfreq	rs2245365	C	A	-0.0135481	0.00224671	9.2e-10
alcohol_overallfreq	3:50098024_CAA_C	CAA	C	-0.0129437	0.0022601	5.5e-09
alcohol_overallfreq	rs2624815	A	G	-0.013085	0.00219428	1.2e-09
alcohol_overallfreq	rs6793528	C	A	-0.0131067	0.00219425	1.1e-09
alcohol_overallfreq	rs2624822	T	C	-0.0131038	0.00219422	1.1e-09
alcohol_overallfreq	rs2240329	G	A	-0.0135225	0.00224673	9.8e-10
alcohol_overallfreq	rs3774734	C	A	-0.0130527	0.00219412	1.3e-09
alcohol_overallfreq	rs9856572	A	T	-0.0132747	0.00225126	2.4e-09
alcohol_overallfreq	rs35212132	C	CT	-0.013677	0.00231241	2.2e-09
alcohol_overallfreq	rs2240327	A	G	-0.0132792	0.00225016	2.3e-09
alcohol_overallfreq	rs7061	C	T	-0.0128614	0.0021991	2.7e-09
alcohol_overallfreq	rs2526743	G	A	-0.0132829	0.00224998	2.3e-09
alcohol_overallfreq	rs77815052	T	TA	-0.0134936	0.00225886	1.5e-09
alcohol_overallfreq	3:50117242_AT_A	AT	A	-0.013258	0.00236433	1.4e-08
alcohol_overallfreq	rs2624816	T	G	-0.013291	0.00224999	2.2e-09
alcohol_overallfreq	rs34831713	T	C	-0.0132915	0.00224999	2.2e-09
alcohol_overallfreq	rs537069642	C	CTT	-0.0148439	0.00233976	1.5e-10
alcohol_overallfreq	rs10049477	T	C	-0.0132954	0.00224998	2.2e-09
alcohol_overallfreq	rs10049087	A	G	-0.0132827	0.00224994	2.3e-09
alcohol_overallfreq	rs9681286	T	C	-0.0128409	0.00219937	2.9e-09
alcohol_overallfreq	3:50125431_CT_C	CT	C	-0.013475	0.00225864	1.5e-09
alcohol_overallfreq	rs2526754	G	A	-0.0132724	0.00224998	2.3e-09
alcohol_overallfreq	rs2247510	C	A	-0.0128716	0.00219902	2.6e-09
alcohol_overallfreq	rs2240326	G	A	-0.0132801	0.00224994	2.3e-09
alcohol_overallfreq	rs2624853	A	G	-0.0132742	0.00225009	2.3e-09
alcohol_overallfreq	rs2013208	C	T	-0.013339	0.00224993	2e-09
alcohol_overallfreq	rs11130241	A	T	-0.0132759	0.00225066	2.4e-09
alcohol_overallfreq	3:50135699_ATTTTTATT_A	ATTTTTATT	A	-0.0132838	0.00225031	2.3e-09
alcohol_overallfreq	rs6808044	A	G	-0.0128757	0.0021992	2.6e-09
alcohol_overallfreq	rs766560846	CTAGT	C	-0.0135546	0.0022476	9.1e-10
alcohol_overallfreq	rs2856234	A	G	-0.0136241	0.00224712	7.4e-10
alcohol_overallfreq	rs1061474	T	C	-0.0128671	0.00219911	2.7e-09
alcohol_overallfreq	rs3733133	T	A	-0.013643	0.00224693	7e-10
alcohol_overallfreq	rs2301166	C	G	-0.0132772	0.00225002	2.3e-09
alcohol_overallfreq	rs1138536	T	C	-0.0128355	0.00219906	2.9e-09
alcohol_overallfreq	rs2624825	G	A	-0.0135609	0.00224675	8.7e-10
alcohol_overallfreq	rs2624826	T	G	-0.0128228	0.00219911	2.9e-09
alcohol_overallfreq	rs2624829	A	G	-0.012855	0.00219911	2.7e-09
alcohol_overallfreq	rs2856238	T	C	-0.0128167	0.00219915	2.9e-09
alcohol_overallfreq	rs2856237	A	G	-0.0128136	0.00219917	2.9e-09
alcohol_overallfreq	rs2071207	T	C	-0.0132565	0.00225006	2.4e-09
alcohol_overallfreq	rs2071206	G	A	-0.0135601	0.00224706	8.7e-10
alcohol_overallfreq	rs2856236	A	C	-0.0133738	0.00225187	1.9e-09
alcohol_overallfreq	rs2008877	T	G	-0.0133335	0.00225069	2e-09
alcohol_overallfreq	rs2624848	T	C	-0.012992	0.00220239	1.9e-09
alcohol_overallfreq	3:50167424_CT_C	CT	C	-0.013046	0.00225517	4.3e-09
alcohol_overallfreq	rs4688686	C	T	-0.0137655	0.0022523	5.9e-10
alcohol_overallfreq	rs7428430	C	T	-0.0142142	0.00225496	1.7e-10
alcohol_overallfreq	rs7642934	G	A	-0.0139739	0.00225216	3.2e-10
alcohol_overallfreq	rs2526388	T	C	-0.0139457	0.00253024	3.6e-08
alcohol_overallfreq	rs5848905	A	AG	-0.012369	0.00229309	4.7e-08
alcohol_overallfreq	rs112269639	G	A	0.0327133	0.0058445	1.6e-08
alcohol_overallfreq	rs12631337	A	G	-0.0118015	0.0021991	4.8e-08
alcohol_overallfreq	rs55716899	T	C	-0.0129378	0.00211049	5.6e-10
alcohol_overallfreq	rs11707890	T	G	-0.0128798	0.00211022	7e-10
alcohol_overallfreq	rs57205040	A	C	-0.0131567	0.00210699	2.8e-10
alcohol_overallfreq	rs62247165	C	T	-0.0134047	0.00210579	1.3e-10
alcohol_overallfreq	rs1876245	T	C	-0.0134584	0.00210542	1.1e-10
alcohol_overallfreq	rs34492796	T	C	-0.0135117	0.00210468	9e-11
alcohol_overallfreq	rs141105463	A	ATC	-0.0135361	0.00210586	8.7e-11
alcohol_overallfreq	rs73093445	C	A	-0.0137222	0.00210426	4.5e-11
alcohol_overallfreq	rs7632921	G	T	-0.0136877	0.00210736	5.6e-11
alcohol_overallfreq	rs35768603	T	C	-0.0134833	0.00210465	1e-10
alcohol_overallfreq	rs11720523	C	A	-0.0135024	0.00210741	1e-10
alcohol_overallfreq	rs62244860	A	G	-0.0138282	0.00210582	3.4e-11
alcohol_overallfreq	rs6779258	T	C	-0.013689	0.00210577	5.4e-11
alcohol_overallfreq	rs62244862	T	A	-0.0137012	0.00210608	5.2e-11
alcohol_overallfreq	rs62244863	T	C	-0.0137257	0.00210604	4.8e-11
alcohol_overallfreq	rs9832796	A	G	-0.0137813	0.00210582	4.1e-11
alcohol_overallfreq	rs1392226	G	A	-0.0137803	0.00210587	4.1e-11
alcohol_overallfreq	rs9837383	T	C	-0.0137838	0.00210593	4.1e-11
alcohol_overallfreq	rs9842406	T	G	-0.0139203	0.0021065	2.6e-11
alcohol_overallfreq	rs6780776	C	T	-0.0135881	0.00211133	8.2e-11
alcohol_overallfreq	rs60756930	A	G	-0.0137836	0.00210796	4.4e-11
alcohol_overallfreq	rs34346645	C	A	-0.0139376	0.00211332	2.8e-11
alcohol_overallfreq	rs57929572	C	T	-0.0135568	0.00211386	1e-10
alcohol_overallfreq	rs60135207	G	T	-0.0134743	0.00211373	1.3e-10
alcohol_overallfreq	rs17662328	G	A	-0.0135838	0.00211048	9.3e-11
alcohol_overallfreq	rs373133762	C	CA	-0.0131194	0.00211466	4.2e-10
alcohol_overallfreq	rs1432611	G	T	-0.0135452	0.00211288	1e-10
alcohol_overallfreq	rs145435853	C	CAG	-0.013075	0.00210719	4.1e-10
alcohol_overallfreq	rs6803008	C	T	-0.0130899	0.00210272	3.7e-10
alcohol_overallfreq	rs6778026	G	A	-0.0130806	0.00210287	3.9e-10
alcohol_overallfreq	rs1499895	T	C	-0.0130548	0.00210354	4.2e-10
alcohol_overallfreq	rs1499894	C	T	-0.0130272	0.00210585	4.5e-10
alcohol_overallfreq	rs7649993	C	G	-0.0129906	0.00210482	5.4e-10
alcohol_overallfreq	rs56343799	G	A	-0.0130191	0.00210483	5e-10
alcohol_overallfreq	rs6764416	C	T	-0.0135887	0.0021143	9e-11
alcohol_overallfreq	rs111242991	C	T	-0.0136014	0.00211437	8.7e-11
alcohol_overallfreq	rs7624274	T	A	-0.0132286	0.0021083	2.5e-10
alcohol_overallfreq	rs7610856	C	A	-0.0139582	0.00211405	2.8e-11
alcohol_overallfreq	rs746573926	CAGCT	C	-0.0139281	0.00211714	3.4e-11
alcohol_overallfreq	rs11714337	G	A	-0.0138137	0.00211219	4.4e-11
alcohol_overallfreq	rs35480566	A	G	-0.0131343	0.002106	3.3e-10
alcohol_overallfreq	rs62244884	G	A	-0.0139406	0.00211158	2.8e-11
alcohol_overallfreq	rs55736314	C	G	-0.0124935	0.00212952	3.5e-09
alcohol_overallfreq	rs62244886	C	G	-0.0133878	0.0021357	2.7e-10
alcohol_overallfreq	rs2036281	G	T	-0.0123457	0.00213134	5.4e-09
alcohol_overallfreq	rs6790644	C	T	-0.0132132	0.0021394	4.8e-10
alcohol_overallfreq	3:71593137_TACACATATACACACATGTATGTGTGTATAC_T	TACACATATACACACATGTATGTGTGTATAC	T	-0.0125659	0.00215079	4.2e-09
alcohol_overallfreq	rs11719972	T	C	-0.0126557	0.00212896	2.1e-09
alcohol_overallfreq	rs11720121	T	C	-0.012195	0.00212888	7.6e-09
alcohol_overallfreq	rs7640614	C	G	-0.0131815	0.0021345	5e-10
alcohol_overallfreq	rs73094902	C	T	-0.0132237	0.00213414	4.4e-10
alcohol_overallfreq	rs62244888	T	C	-0.0125367	0.00211117	2.1e-09
alcohol_overallfreq	rs6549400	T	G	-0.0126411	0.00211001	1.4e-09
alcohol_overallfreq	rs11718871	G	C	-0.0124222	0.00211018	2.7e-09
alcohol_overallfreq	rs62244889	G	A	-0.0122406	0.00210923	4.1e-09
alcohol_overallfreq	rs62244890	T	C	-0.0133279	0.00211654	2.1e-10
alcohol_overallfreq	rs1529675	A	G	-0.012024	0.00213329	9.4e-09
alcohol_overallfreq	rs11709906	G	A	-0.0116884	0.00212377	1.8e-08
alcohol_overallfreq	rs830663	T	C	-0.0118669	0.00212304	1.1e-08
alcohol_overallfreq	rs830651	T	C	-0.0117777	0.0021227	1.4e-08
alcohol_overallfreq	rs853866	T	A	-0.0116126	0.00212209	2.1e-08
alcohol_overallfreq	rs830654	C	T	-0.0116157	0.00212149	2.1e-08
alcohol_overallfreq	rs34843569	C	CA	-0.0114699	0.00212418	3.5e-08
alcohol_overallfreq	rs830643	G	A	-0.0116007	0.00211981	2.3e-08
alcohol_overallfreq	rs1374915	T	C	-0.0114997	0.00211804	3.2e-08
alcohol_overallfreq	rs830642	G	A	-0.0114808	0.00211838	3.4e-08
alcohol_overallfreq	rs830641	G	T	-0.0114096	0.00211791	4.1e-08
alcohol_overallfreq	rs830640	G	A	-0.0114616	0.00211792	3.6e-08
alcohol_overallfreq	rs704255	G	A	-0.0113997	0.0021179	4e-08
alcohol_overallfreq	rs9831374	C	T	-0.012374	0.00226354	4.4e-08
alcohol_overallfreq	rs11719276	A	G	-0.0123711	0.00226348	4.4e-08
alcohol_overallfreq	rs546335199	C	CCACACACA	-0.0132001	0.00228449	7.9e-09
alcohol_overallfreq	rs9309973	A	T	-0.0120851	0.00218051	2.8e-08
alcohol_overallfreq	rs9811546	G	A	-0.0137972	0.00224099	7.8e-10
alcohol_overallfreq	rs772891370	CCTT	C	-0.0133505	0.00224072	2.6e-09
alcohol_overallfreq	rs9810508	G	A	-0.0127588	0.00232803	4e-08
alcohol_overallfreq	rs28732378	A	G	0.015325	0.00236924	1.1e-10
alcohol_overallfreq	rs62253107	T	G	0.014767	0.00233906	3.1e-10
alcohol_overallfreq	rs9822731	T	C	-0.0164053	0.00249494	6.3e-11
alcohol_overallfreq	rs12498010	C	T	-0.0157372	0.00245106	1.7e-10
alcohol_overallfreq	rs9814516	G	T	-0.0159773	0.00245088	8.9e-11
alcohol_overallfreq	rs10154865	C	T	-0.0164125	0.00249453	6.3e-11
alcohol_overallfreq	rs9824178	G	A	0.0147072	0.0023373	3.5e-10
alcohol_overallfreq	rs9861451	A	G	0.0147092	0.0023373	3.5e-10
alcohol_overallfreq	rs11917490	G	A	0.0146353	0.00233436	4e-10
alcohol_overallfreq	rs13076632	C	T	-0.0157743	0.00245098	1.6e-10
alcohol_overallfreq	rs13076830	C	T	-0.016411	0.00249448	6.3e-11
alcohol_overallfreq	rs13099750	T	A	-0.0157407	0.0024508	1.7e-10
alcohol_overallfreq	rs9846211	C	A	-0.0163589	0.00249324	6.9e-11
alcohol_overallfreq	rs9866089	T	C	-0.0156052	0.00242007	1.3e-10
alcohol_overallfreq	rs7627971	T	C	0.0146042	0.00233662	4.6e-10
alcohol_overallfreq	rs11127887	G	A	-0.0157265	0.00245032	1.8e-10
alcohol_overallfreq	rs9870448	A	G	-0.0162783	0.00249372	8.8e-11
alcohol_overallfreq	3:85419571_CAAAAT_C	CAAAAT	C	-0.0163081	0.00249523	8.2e-11
alcohol_overallfreq	rs111758983	A	AT	-0.0156845	0.00242315	1.1e-10
alcohol_overallfreq	rs9854869	C	A	-0.0163021	0.00249407	8.3e-11
alcohol_overallfreq	rs71108284	C	CTGTGTG	0.0148647	0.00248306	2.7e-09
alcohol_overallfreq	rs4279114	C	G	-0.0156251	0.00241991	1.2e-10
alcohol_overallfreq	rs9865191	C	T	-0.0156194	0.00242052	1.2e-10
alcohol_overallfreq	rs6776114	G	A	0.0145642	0.0023117	2.8e-10
alcohol_overallfreq	rs2163971	T	C	0.0121024	0.00210404	7.1e-09
alcohol_overallfreq	rs1433711	C	T	-0.0156283	0.00242177	1.2e-10
alcohol_overallfreq	rs13085170	C	A	-0.0156568	0.0024217	1.1e-10
alcohol_overallfreq	rs9819830	T	C	-0.015588	0.00242199	1.4e-10
alcohol_overallfreq	rs9814919	G	C	-0.0156706	0.00242206	1.1e-10
alcohol_overallfreq	rs11921010	T	C	0.0125307	0.00213246	3.9e-09
alcohol_overallfreq	rs2326313	T	A	-0.0156611	0.00242153	1.1e-10
alcohol_overallfreq	rs9879025	C	T	-0.0157029	0.00242108	9.8e-11
alcohol_overallfreq	rs1821349	A	G	-0.0156381	0.00242161	1.2e-10
alcohol_overallfreq	rs1368743	A	G	-0.0156372	0.00242161	1.2e-10
alcohol_overallfreq	rs10511087	A	G	0.0128371	0.00214506	1.9e-09
alcohol_overallfreq	rs1368742	A	G	0.0129057	0.00214487	1.6e-09
alcohol_overallfreq	rs9309977	C	T	-0.0156411	0.00242173	1.2e-10
alcohol_overallfreq	rs1991872	G	A	0.0128579	0.00214494	1.8e-09
alcohol_overallfreq	rs9833314	G	A	-0.0156458	0.0024218	1.2e-10
alcohol_overallfreq	rs12637798	A	G	0.0128186	0.002145	2e-09
alcohol_overallfreq	rs4308294	A	T	0.0129499	0.00214958	1.5e-09
alcohol_overallfreq	rs9863620	T	C	-0.0155884	0.00242166	1.4e-10
alcohol_overallfreq	rs71626887	G	T	-0.015639	0.00242178	1.2e-10
alcohol_overallfreq	rs7650834	C	A	-0.0155917	0.0024218	1.4e-10
alcohol_overallfreq	rs12638482	C	T	0.0127719	0.00214402	2.2e-09
alcohol_overallfreq	rs62250685	A	G	0.0129939	0.00214399	1.2e-09
alcohol_overallfreq	rs11918899	A	G	0.012723	0.00214401	2.6e-09
alcohol_overallfreq	rs2117151	C	A	-0.0154617	0.00242062	1.9e-10
alcohol_overallfreq	rs1030721	T	C	-0.0154865	0.00242111	1.8e-10
alcohol_overallfreq	rs1549979	C	T	0.012901	0.00214402	1.6e-09
alcohol_overallfreq	rs9880919	G	A	-0.015529	0.00242357	1.6e-10
alcohol_overallfreq	rs6791236	T	C	-0.0162315	0.00249323	1e-10
alcohol_overallfreq	rs4856569	A	G	0.0127301	0.00214374	2.5e-09
alcohol_overallfreq	rs6549024	T	C	-0.0154097	0.00242059	2.2e-10
alcohol_overallfreq	rs80285517	C	CATT	0.0128782	0.00214695	1.8e-09
alcohol_overallfreq	rs2053108	C	A	0.0126417	0.00214378	3.2e-09
alcohol_overallfreq	rs6808400	T	C	0.0126587	0.00214411	3.1e-09
alcohol_overallfreq	rs145250965	G	GA	0.0127039	0.00214649	2.8e-09
alcohol_overallfreq	rs62250686	T	A	0.0127435	0.00214526	2.5e-09
alcohol_overallfreq	rs12493461	A	G	-0.0155409	0.00242057	1.5e-10
alcohol_overallfreq	rs6780968	C	G	0.0126407	0.00214404	3.3e-09
alcohol_overallfreq	rs62250687	T	A	0.0126461	0.00214418	3.2e-09
alcohol_overallfreq	rs2196096	T	C	-0.0162303	0.00250078	1.1e-10
alcohol_overallfreq	rs2196097	C	T	-0.0162069	0.0025003	1.2e-10
alcohol_overallfreq	rs60311538	T	G	0.0127903	0.00214367	2.1e-09
alcohol_overallfreq	rs777931591	AAC	A	0.0126607	0.00214591	3.1e-09
alcohol_overallfreq	rs10433498	G	A	-0.0152921	0.00242048	3e-10
alcohol_overallfreq	rs7636243	C	T	0.0125496	0.00214371	4.2e-09
alcohol_overallfreq	rs7650284	T	C	0.0125268	0.00214365	4.5e-09
alcohol_overallfreq	rs7638953	G	A	0.0126146	0.00214362	3.5e-09
alcohol_overallfreq	rs6772991	A	G	-0.0153669	0.00242003	2.4e-10
alcohol_overallfreq	rs9865745	T	A	-0.0152701	0.00242044	3.2e-10
alcohol_overallfreq	rs4856571	G	C	0.0127616	0.00214352	2.3e-09
alcohol_overallfreq	3:85475281_CT_C	CT	C	0.0129201	0.00215357	1.8e-09
alcohol_overallfreq	rs744580	T	A	-0.0152811	0.00242266	3.3e-10
alcohol_overallfreq	rs35894540	T	C	0.0126168	0.00214402	3.5e-09
alcohol_overallfreq	rs13081230	G	A	-0.0152587	0.00242243	3.4e-10
alcohol_overallfreq	rs6807456	C	G	-0.0153335	0.00242098	2.7e-10
alcohol_overallfreq	rs6808159	C	T	-0.0152791	0.00242247	3.2e-10
alcohol_overallfreq	rs2326309	T	G	0.0125845	0.00214529	3.9e-09
alcohol_overallfreq	rs2326310	G	A	0.0125594	0.00214528	4.2e-09
alcohol_overallfreq	rs148021980	A	AGAGAAAGAG	-0.0153539	0.00243554	3.3e-10
alcohol_overallfreq	rs1025533	C	T	-0.0153592	0.00242084	2.5e-10
alcohol_overallfreq	rs1865250	T	C	0.0128095	0.00214388	2e-09
alcohol_overallfreq	rs11716233	C	T	-0.0160631	0.00249345	1.6e-10
alcohol_overallfreq	rs1433708	T	C	0.0126083	0.00214453	3.6e-09
alcohol_overallfreq	rs9860769	C	T	0.0125841	0.00214459	3.9e-09
alcohol_overallfreq	rs7609594	G	A	0.0126357	0.00214451	3.3e-09
alcohol_overallfreq	rs35827242	G	A	0.0127008	0.00214429	2.7e-09
alcohol_overallfreq	rs2196099	G	C	0.0126197	0.00214456	3.5e-09
alcohol_overallfreq	rs13092627	C	T	-0.0153298	0.00242108	2.8e-10
alcohol_overallfreq	rs2217720	G	T	0.0126116	0.00214456	3.6e-09
alcohol_overallfreq	3:85486209_GT_G	GT	G	-0.0160767	0.00249412	1.6e-10
alcohol_overallfreq	rs1025531	T	A	-0.0153638	0.00242103	2.5e-10
alcohol_overallfreq	rs9863488	G	A	0.0126125	0.00214456	3.6e-09
alcohol_overallfreq	rs11929525	T	C	0.0128083	0.00214392	2e-09
alcohol_overallfreq	rs111590465	GA	G	0.0127234	0.00217494	4.4e-09
alcohol_overallfreq	rs12629036	T	C	0.0126412	0.00214493	3.3e-09
alcohol_overallfreq	rs1821351	C	T	0.0126124	0.00214456	3.6e-09
alcohol_overallfreq	rs12637461	G	T	0.0126993	0.00214429	2.7e-09
alcohol_overallfreq	rs9868427	C	T	-0.0153554	0.00242099	2.6e-10
alcohol_overallfreq	rs9813512	T	G	-0.0153547	0.00242105	2.6e-10
alcohol_overallfreq	rs1865252	A	G	0.0126121	0.00214457	3.6e-09
alcohol_overallfreq	rs1865251	A	C	0.012721	0.00214425	2.6e-09
alcohol_overallfreq	rs1897699	A	T	0.0128581	0.00214382	1.7e-09
alcohol_overallfreq	rs768161384	AT	A	-0.0153441	0.00242123	2.7e-10
alcohol_overallfreq	rs9874740	G	A	-0.0153979	0.00242094	2.3e-10
alcohol_overallfreq	rs9874491	C	T	-0.0160974	0.00249445	1.5e-10
alcohol_overallfreq	rs2082556	G	A	0.0128545	0.00214383	1.8e-09
alcohol_overallfreq	rs11376660	A	AG	0.0125873	0.00215202	4.4e-09
alcohol_overallfreq	rs551414092	A	G	-0.0161971	0.00250493	1.4e-10
alcohol_overallfreq	rs569822025	T	A	-0.0161971	0.00250493	1.4e-10
alcohol_overallfreq	rs530949414	A	G	-0.0161966	0.00250493	1.4e-10
alcohol_overallfreq	rs549942803	T	A	-0.0161966	0.00250493	1.4e-10
alcohol_overallfreq	rs568187754	A	G	-0.0161972	0.00250496	1.4e-10
alcohol_overallfreq	rs7627044	G	A	0.0126703	0.00214446	3e-09
alcohol_overallfreq	rs9820228	C	T	-0.0160824	0.00249384	1.5e-10
alcohol_overallfreq	rs9821041	C	T	-0.0154147	0.00242095	2.2e-10
alcohol_overallfreq	rs4856572	T	C	0.0127438	0.00214426	2.4e-09
alcohol_overallfreq	rs11127890	C	T	-0.0153493	0.00242144	2.7e-10
alcohol_overallfreq	rs2033526	A	C	0.0126944	0.00214464	2.8e-09
alcohol_overallfreq	rs9828679	T	C	-0.016198	0.00249556	1.2e-10
alcohol_overallfreq	rs11922956	A	G	0.012639	0.00214514	3.4e-09
alcohol_overallfreq	rs993137	C	T	0.0127448	0.00214459	2.5e-09
alcohol_overallfreq	rs993136	T	C	0.0126194	0.00214489	3.6e-09
alcohol_overallfreq	rs759872341	TTAAA	T	-0.0152558	0.00242248	3.4e-10
alcohol_overallfreq	rs6762695	A	G	0.0126384	0.00214499	3.4e-09
alcohol_overallfreq	rs1433715	C	A	0.0129452	0.00215245	1.6e-09
alcohol_overallfreq	rs9835441	G	A	-0.0153759	0.0024216	2.5e-10
alcohol_overallfreq	rs993716	C	T	0.012618	0.00214485	3.6e-09
alcohol_overallfreq	rs145394945	C	CAT	0.0126008	0.00215045	4.3e-09
alcohol_overallfreq	rs2117153	G	A	0.0125805	0.00214506	4e-09
alcohol_overallfreq	rs1433714	T	G	0.0126391	0.00214486	3.4e-09
alcohol_overallfreq	rs2196098	A	G	-0.0161274	0.00249417	1.4e-10
alcohol_overallfreq	rs9309980	A	G	-0.0153729	0.00242164	2.5e-10
alcohol_overallfreq	rs9309981	A	G	-0.0153729	0.00242164	2.5e-10
alcohol_overallfreq	rs200012100	CT	C	0.0126307	0.00214584	3.6e-09
alcohol_overallfreq	rs9309982	T	C	-0.0153705	0.00242169	2.5e-10
alcohol_overallfreq	rs57630146	G	A	0.0126435	0.00214608	3.4e-09
alcohol_overallfreq	rs1368740	A	G	-0.0149684	0.0024058	5.3e-10
alcohol_overallfreq	rs1368739	T	C	-0.0153761	0.00242174	2.5e-10
alcohol_overallfreq	rs13068434	A	G	-0.0160889	0.00249426	1.5e-10
alcohol_overallfreq	rs4856573	G	A	0.012604	0.00214488	3.7e-09
alcohol_overallfreq	3:85509064_AT_A	AT	A	-0.0153405	0.00242231	2.8e-10
alcohol_overallfreq	rs71108293	G	GA	-0.0151692	0.00244422	6.2e-10
alcohol_overallfreq	rs12633762	T	C	-0.0154908	0.00242007	1.8e-10
alcohol_overallfreq	rs11127891	T	C	-0.015493	0.00242	1.8e-10
alcohol_overallfreq	rs62250711	A	T	0.0127042	0.00214447	2.8e-09
alcohol_overallfreq	rs751642491	TATG	T	0.0127642	0.00214662	2.5e-09
alcohol_overallfreq	rs9838811	C	A	-0.0154936	0.00242005	1.8e-10
alcohol_overallfreq	rs6774985	T	C	0.0127219	0.00214442	2.7e-09
alcohol_overallfreq	rs6762267	C	A	0.0128593	0.00214394	1.8e-09
alcohol_overallfreq	rs62250712	C	T	0.0128811	0.00214418	1.7e-09
alcohol_overallfreq	rs62250713	A	G	0.0128739	0.00216635	3e-09
alcohol_overallfreq	rs62250714	G	A	0.0127858	0.00215408	2.6e-09
alcohol_overallfreq	rs62250715	G	A	0.0127717	0.00215393	2.7e-09
alcohol_overallfreq	rs13070166	T	A	-0.0157623	0.00248456	3e-10
alcohol_overallfreq	rs34133544	G	GA	0.0128912	0.00217932	3.4e-09
alcohol_overallfreq	rs2875907	A	G	0.0128664	0.00217917	3.6e-09
alcohol_overallfreq	rs1368750	T	C	0.0127968	0.00215248	2.5e-09
alcohol_overallfreq	rs755218992	TTTG	T	-0.0160125	0.0024915	1.8e-10
alcohol_overallfreq	rs1155666	T	C	0.0127957	0.00215246	2.5e-09
alcohol_overallfreq	rs2069123	T	G	0.012799	0.00215257	2.5e-09
alcohol_overallfreq	rs11127893	C	T	0.0128928	0.00217889	3.3e-09
alcohol_overallfreq	rs67336646	T	A	0.0128698	0.00215231	2e-09
alcohol_overallfreq	rs12637791	T	G	0.0127474	0.00217951	5e-09
alcohol_overallfreq	rs200031720	A	ATCTCC	0.0129335	0.00218168	3.1e-09
alcohol_overallfreq	rs557667709	T	TCTC	0.0129201	0.00218517	3.4e-09
alcohol_overallfreq	rs7621381	C	G	0.0128917	0.00215218	1.9e-09
alcohol_overallfreq	rs1542248	G	A	0.0128917	0.00215218	1.9e-09
alcohol_overallfreq	rs201247614	TGG	TG	0.012877	0.00215274	2e-09
alcohol_overallfreq	rs7614148	G	A	0.012877	0.00215231	1.9e-09
alcohol_overallfreq	rs9841144	A	T	-0.0161721	0.00248738	1.1e-10
alcohol_overallfreq	rs62250719	G	T	0.0128576	0.00215276	2.1e-09
alcohol_overallfreq	rs10511085	C	A	0.0128576	0.00215276	2.1e-09
alcohol_overallfreq	rs17515196	G	A	0.0128767	0.00215231	1.9e-09
alcohol_overallfreq	rs1813696	A	G	0.0129096	0.00217886	3.1e-09
alcohol_overallfreq	rs796100914	G	GA	0.0129089	0.00215275	1.8e-09
alcohol_overallfreq	rs57872438	G	A	0.0128715	0.00215239	2e-09
alcohol_overallfreq	rs2077839	C	T	0.0129213	0.00217875	3e-09
alcohol_overallfreq	rs9849399	A	C	-0.0161824	0.00248712	1.1e-10
alcohol_overallfreq	3:85538811_GA_G	GA	G	-0.016046	0.00251562	2.6e-10
alcohol_overallfreq	3:85538846_CA_C	CA	C	-0.0161578	0.00248763	1.2e-10
alcohol_overallfreq	3:85538893_CGT_C	CGT	C	0.0129208	0.00218174	3.3e-09
alcohol_overallfreq	rs55994690	T	A	0.0121762	0.00219061	2.9e-08
alcohol_overallfreq	rs55897272	G	A	0.0127058	0.00215568	3.4e-09
alcohol_overallfreq	rs7647981	A	G	0.012887	0.00217893	3.4e-09
alcohol_overallfreq	rs138246680	C	CATTAT	0.0130188	0.00219056	3e-09
alcohol_overallfreq	rs67416405	T	C	0.0129237	0.00217874	3e-09
alcohol_overallfreq	rs11127895	T	G	0.0129122	0.00215216	1.8e-09
alcohol_overallfreq	rs11127896	C	T	0.012909	0.00215217	1.8e-09
alcohol_overallfreq	rs57755423	A	C	0.0129232	0.00217874	3e-09
alcohol_overallfreq	3:85541934_CT_C	CT	C	0.0129117	0.00217896	3.2e-09
alcohol_overallfreq	rs751352529	CT	C	0.0128045	0.00215372	2.4e-09
alcohol_overallfreq	rs9844512	C	A	-0.0161514	0.00248776	1.2e-10
alcohol_overallfreq	rs1551043	G	T	0.0129292	0.00215286	1.7e-09
alcohol_overallfreq	rs1551044	T	C	0.0129118	0.00217925	3.1e-09
alcohol_overallfreq	rs7614552	T	A	0.0129335	0.00217873	2.9e-09
alcohol_overallfreq	rs10433525	T	C	0.0129136	0.00217928	3.1e-09
alcohol_overallfreq	rs201815280	ACACC	A	0.0129464	0.00218485	3.1e-09
alcohol_overallfreq	rs10433499	C	T	0.0129113	0.00217929	3.1e-09
alcohol_overallfreq	rs10433500	G	A	0.0128511	0.00216896	2.5e-09
alcohol_overallfreq	rs7618124	A	G	0.0129834	0.00217913	2.5e-09
alcohol_overallfreq	rs7618429	A	G	0.012893	0.00215275	1.9e-09
alcohol_overallfreq	rs6549030	T	C	0.0129166	0.00217931	3.1e-09
alcohol_overallfreq	rs62250750	T	C	0.0129308	0.00215205	1.7e-09
alcohol_overallfreq	rs726610	C	T	0.0129972	0.00218145	2.6e-09
alcohol_overallfreq	rs12638798	T	C	0.012951	0.00217866	2.8e-09
alcohol_overallfreq	rs58175373	C	CCA	0.0128877	0.0021524	1.9e-09
alcohol_overallfreq	rs55667839	A	T	0.0128809	0.00215233	1.9e-09
alcohol_overallfreq	rs62250752	T	A	0.0128859	0.00215274	1.9e-09
alcohol_overallfreq	rs570682061	A	AT	0.0128814	0.00215234	1.9e-09
alcohol_overallfreq	rs62250753	C	G	0.0128814	0.00215234	1.9e-09
alcohol_overallfreq	rs80039138	C	A	0.0128814	0.00215234	1.9e-09
alcohol_overallfreq	rs79093540	C	A	0.0128814	0.00215234	1.9e-09
alcohol_overallfreq	rs77288822	T	A	0.0128814	0.00215234	1.9e-09
alcohol_overallfreq	rs4637303	C	T	0.0127974	0.0021799	4.3e-09
alcohol_overallfreq	rs6809805	C	A	-0.0162278	0.00248719	9.6e-11
alcohol_overallfreq	rs13084531	C	G	-0.0161945	0.00248799	1.1e-10
alcohol_overallfreq	rs12495758	G	A	0.0129902	0.00218113	2.7e-09
alcohol_overallfreq	rs1449391	G	T	0.0128928	0.00215294	1.9e-09
alcohol_overallfreq	3:85557073_TA_T	TA	T	0.0128791	0.00217881	3.4e-09
alcohol_overallfreq	rs62250754	G	T	0.0129476	0.00215205	1.6e-09
alcohol_overallfreq	rs11127897	T	C	0.0129268	0.00217933	3e-09
alcohol_overallfreq	rs755644987	TAATA	T	0.0129173	0.00215194	1.7e-09
alcohol_overallfreq	rs6804845	A	C	0.0129109	0.00215258	1.8e-09
alcohol_overallfreq	rs62250758	G	T	0.0129192	0.00215174	1.7e-09
alcohol_overallfreq	rs17455991	T	C	0.0129391	0.00217823	2.9e-09
alcohol_overallfreq	rs1375560	G	T	0.0129269	0.00215165	1.7e-09
alcohol_overallfreq	rs1992967	G	A	0.0128885	0.00217895	3.4e-09
alcohol_overallfreq	rs17515586	A	G	0.0128766	0.00215239	2e-09
alcohol_overallfreq	rs9841829	T	G	-0.0161818	0.00248684	1.1e-10
alcohol_overallfreq	rs10511083	A	G	0.0128782	0.00215238	2e-09
alcohol_overallfreq	rs6764988	A	C	0.0129212	0.00215164	1.7e-09
alcohol_overallfreq	rs1868532	C	T	0.0128866	0.00215241	1.9e-09
alcohol_overallfreq	rs1449393	C	T	0.0128868	0.00215241	1.9e-09
alcohol_overallfreq	rs1449394	C	T	0.0129292	0.00215165	1.7e-09
alcohol_overallfreq	rs4856579	T	C	0.0128861	0.00215241	1.9e-09
alcohol_overallfreq	rs4856580	T	A	0.0128869	0.00215241	1.9e-09
alcohol_overallfreq	rs58828944	T	C	0.012936	0.00215166	1.6e-09
alcohol_overallfreq	rs59825726	G	A	0.0128892	0.00215242	1.9e-09
alcohol_overallfreq	rs62252462	G	A	0.0129052	0.00215175	1.8e-09
alcohol_overallfreq	rs62252463	G	A	0.012936	0.00215166	1.6e-09
alcohol_overallfreq	rs62252464	A	G	0.0129374	0.00215183	1.6e-09
alcohol_overallfreq	rs62252465	C	T	0.0129343	0.00215167	1.6e-09
alcohol_overallfreq	rs62252466	A	G	0.0129343	0.00215167	1.6e-09
alcohol_overallfreq	rs62252467	G	C	0.0129343	0.00215167	1.6e-09
alcohol_overallfreq	rs34107103	G	GA	0.0129732	0.0021784	2.6e-09
alcohol_overallfreq	rs1470635	C	T	0.0128841	0.00215315	2e-09
alcohol_overallfreq	rs1470636	A	C	0.0129294	0.00215167	1.7e-09
alcohol_overallfreq	rs7427346	T	C	0.0128776	0.00215318	2e-09
alcohol_overallfreq	rs35738543	T	G	0.0129291	0.00215167	1.7e-09
alcohol_overallfreq	rs17456263	C	A	0.0129287	0.00215167	1.7e-09
alcohol_overallfreq	rs35701422	T	C	0.0127333	0.00215293	3e-09
alcohol_overallfreq	rs12491722	T	C	0.0129407	0.00217826	2.9e-09
alcohol_overallfreq	rs59967234	A	G	0.0128788	0.00215315	2e-09
alcohol_overallfreq	rs59225869	A	G	0.0129333	0.00215167	1.7e-09
alcohol_overallfreq	rs60427790	T	C	0.0129323	0.00215167	1.7e-09
alcohol_overallfreq	rs56778912	C	T	0.0129333	0.00215167	1.7e-09
alcohol_overallfreq	rs66505109	A	C	0.0129426	0.00215175	1.6e-09
alcohol_overallfreq	rs7628237	A	G	0.0129212	0.00215163	1.7e-09
alcohol_overallfreq	rs9851444	T	C	-0.0162893	0.002487	8.1e-11
alcohol_overallfreq	3:85576749_GA_G	GA	G	0.0125717	0.00215579	4.8e-09
alcohol_overallfreq	rs56777875	G	A	0.012941	0.00215168	1.6e-09
alcohol_overallfreq	rs4856581	G	A	0.0129258	0.00215267	1.7e-09
alcohol_overallfreq	rs4856583	A	G	0.0129395	0.00215166	1.6e-09
alcohol_overallfreq	rs770757694	GCACACT	G	0.0126601	0.00217168	4.6e-09
alcohol_overallfreq	rs1449389	A	G	0.0129305	0.00215266	1.7e-09
alcohol_overallfreq	rs57671246	C	G	0.012943	0.00215166	1.6e-09
alcohol_overallfreq	rs1449390	G	A	0.0129402	0.00215217	1.7e-09
alcohol_overallfreq	rs10511078	G	A	0.0129403	0.00217924	2.9e-09
alcohol_overallfreq	rs55939743	G	A	0.0129277	0.00215272	1.7e-09
alcohol_overallfreq	rs62252495	G	A	0.0129293	0.00215178	1.7e-09
alcohol_overallfreq	rs62252496	G	A	0.012936	0.00215268	1.7e-09
alcohol_overallfreq	rs62252497	C	T	0.0129279	0.00215182	1.7e-09
alcohol_overallfreq	rs56187922	C	A	0.0129534	0.0021517	1.6e-09
alcohol_overallfreq	rs12633657	C	A	0.0129538	0.00217928	2.8e-09
alcohol_overallfreq	rs113642272	G	T	0.0126371	0.00217534	5.8e-09
alcohol_overallfreq	rs748919689	CA	C	0.0128829	0.00215598	2.1e-09
alcohol_overallfreq	rs62252499	A	G	0.0129523	0.00215167	1.6e-09
alcohol_overallfreq	rs62252500	C	T	0.0129496	0.00215166	1.6e-09
alcohol_overallfreq	rs62252501	A	G	0.0129415	0.00215207	1.6e-09
alcohol_overallfreq	rs4856584	A	T	0.0128388	0.00217988	3.9e-09
alcohol_overallfreq	rs17516256	G	A	0.0128873	0.00215291	2e-09
alcohol_overallfreq	rs11923525	G	A	0.0128276	0.00215265	2.3e-09
alcohol_overallfreq	rs35608699	T	A	0.0128179	0.0021537	2.4e-09
alcohol_overallfreq	rs77657121	G	A	0.0129663	0.00215282	1.5e-09
alcohol_overallfreq	rs17516284	G	A	0.012975	0.00215175	1.5e-09
alcohol_overallfreq	rs62252503	G	C	0.0129673	0.00215275	1.5e-09
alcohol_overallfreq	rs62252505	C	T	0.0129669	0.00215274	1.5e-09
alcohol_overallfreq	rs113351222	A	C	0.0129689	0.00215182	1.5e-09
alcohol_overallfreq	rs62252506	T	C	0.0129688	0.00215182	1.5e-09
alcohol_overallfreq	rs62252507	C	T	0.0129775	0.00215175	1.5e-09
alcohol_overallfreq	rs62252508	G	A	0.0129347	0.00217978	3e-09
alcohol_overallfreq	rs62252509	C	T	0.0129663	0.00215276	1.5e-09
alcohol_overallfreq	rs17456763	C	T	0.0129574	0.00215282	1.6e-09
alcohol_overallfreq	rs17516346	A	G	0.0129598	0.00215188	1.5e-09
alcohol_overallfreq	rs67018424	G	A	0.0129574	0.00215282	1.6e-09
alcohol_overallfreq	rs17456820	T	A	0.0129574	0.00215282	1.6e-09
alcohol_overallfreq	rs10511076	A	G	0.0129682	0.0021518	1.5e-09
alcohol_overallfreq	rs10511075	G	A	0.0129687	0.0021518	1.5e-09
alcohol_overallfreq	rs58919842	G	A	0.0129579	0.00215282	1.6e-09
alcohol_overallfreq	rs59491876	C	G	0.0129579	0.00215282	1.6e-09
alcohol_overallfreq	rs59770976	A	G	0.012968	0.0021518	1.5e-09
alcohol_overallfreq	rs12629607	T	C	0.0130228	0.00218083	2.5e-09
alcohol_overallfreq	rs56779213	A	G	0.0129658	0.00215184	1.5e-09
alcohol_overallfreq	rs17516470	C	G	0.0129774	0.00215347	1.5e-09
alcohol_overallfreq	rs57756567	T	A	0.0129656	0.00215184	1.5e-09
alcohol_overallfreq	rs17516504	T	C	0.0129774	0.00215347	1.5e-09
alcohol_overallfreq	rs76034006	G	GA	0.0129455	0.00215559	1.7e-09
alcohol_overallfreq	rs62252512	A	T	0.0129819	0.00215334	1.5e-09
alcohol_overallfreq	rs201100085	CT	C	0.012984	0.00215154	1.4e-09
alcohol_overallfreq	rs17516546	A	G	0.012411	0.00214816	6.7e-09
alcohol_overallfreq	rs73130364	T	C	0.0124269	0.00214871	6.4e-09
alcohol_overallfreq	rs73130366	G	A	0.0124108	0.00214816	6.7e-09
alcohol_overallfreq	rs66625173	A	G	0.0129728	0.00215176	1.5e-09
alcohol_overallfreq	rs17516580	G	C	0.0129599	0.00215211	1.5e-09
alcohol_overallfreq	rs17457050	C	T	0.0129691	0.00215172	1.5e-09
alcohol_overallfreq	rs67544605	A	T	0.012969	0.00215172	1.5e-09
alcohol_overallfreq	rs17516683	G	A	0.0129692	0.00215315	1.5e-09
alcohol_overallfreq	3:85585542_TA_T	TA	T	-0.0163279	0.00249317	8.2e-11
alcohol_overallfreq	rs201174580	TG	T	0.013017	0.00215365	1.3e-09
alcohol_overallfreq	rs66781790	A	G	0.012969	0.00215172	1.5e-09
alcohol_overallfreq	rs17457189	G	A	0.0129694	0.00215172	1.5e-09
alcohol_overallfreq	rs17457217	A	T	0.0129693	0.00215172	1.5e-09
alcohol_overallfreq	rs776608075	TTGTTTGTGTG	T	0.0129394	0.00215419	1.7e-09
alcohol_overallfreq	rs79269550	T	G	0.0129495	0.00215198	1.6e-09
alcohol_overallfreq	rs765266510	GCTATTTAACATGTCATGA	G	0.0129575	0.00215993	1.8e-09
alcohol_overallfreq	rs2167046	G	A	0.0130497	0.00215315	1.2e-09
alcohol_overallfreq	rs2167047	A	T	0.0129691	0.00215172	1.5e-09
alcohol_overallfreq	rs5850689	T	TG	0.0129326	0.00217787	2.7e-09
alcohol_overallfreq	rs2122235	C	T	0.0129845	0.00215156	1.4e-09
alcohol_overallfreq	rs62252513	C	T	0.0129899	0.00215156	1.4e-09
alcohol_overallfreq	3:85587603_CT_C	CT	C	0.0129769	0.00215159	1.5e-09
alcohol_overallfreq	rs17516857	A	C	0.012998	0.00215164	1.4e-09
alcohol_overallfreq	rs11127898	C	G	0.0128441	0.00217903	3.8e-09
alcohol_overallfreq	rs78661387	C	CA	0.012979	0.00215153	1.5e-09
alcohol_overallfreq	rs139750202	T	TAA	0.0127999	0.00216843	3.2e-09
alcohol_overallfreq	rs34467301	T	C	0.0129692	0.00215161	1.5e-09
alcohol_overallfreq	rs35438712	T	C	0.0130225	0.00215295	1.3e-09
alcohol_overallfreq	rs17457377	T	G	0.0129897	0.00215156	1.4e-09
alcohol_overallfreq	rs148921522	T	TTAAC	0.0131831	0.00215883	9.3e-10
alcohol_overallfreq	rs62252516	C	T	0.0129941	0.00215356	1.4e-09
alcohol_overallfreq	rs17457426	A	C	0.0129627	0.00215345	1.6e-09
alcohol_overallfreq	rs17457454	T	C	0.0129612	0.00215345	1.6e-09
alcohol_overallfreq	rs62252518	A	T	0.0129836	0.00215156	1.4e-09
alcohol_overallfreq	rs62252519	T	A	0.0129812	0.00215157	1.4e-09
alcohol_overallfreq	rs6766493	G	A	0.0129517	0.00215159	1.6e-09
alcohol_overallfreq	rs6779501	T	C	0.0129222	0.00215165	1.7e-09
alcohol_overallfreq	rs4856271	A	G	0.012947	0.00215161	1.6e-09
alcohol_overallfreq	rs9873400	G	A	-0.0162875	0.00249114	8.8e-11
alcohol_overallfreq	rs58796643	A	T	0.012959	0.00215192	1.5e-09
alcohol_overallfreq	rs60597959	T	A	0.012959	0.00215192	1.5e-09
alcohol_overallfreq	rs62253961	C	T	0.0129587	0.00215192	1.5e-09
alcohol_overallfreq	rs142262917	C	CAT	0.0129553	0.00215166	1.6e-09
alcohol_overallfreq	rs61586601	A	T	0.0129364	0.0021535	1.7e-09
alcohol_overallfreq	rs57813006	T	TA	0.0127235	0.00216396	4e-09
alcohol_overallfreq	rs17517080	C	G	0.0129524	0.00215159	1.6e-09
alcohol_overallfreq	rs17517121	G	A	0.0129364	0.0021535	1.7e-09
alcohol_overallfreq	rs17517142	A	C	0.0129525	0.00215159	1.6e-09
alcohol_overallfreq	rs17457642	C	T	0.0129363	0.00215351	1.7e-09
alcohol_overallfreq	rs17457669	T	C	0.0129364	0.0021535	1.7e-09
alcohol_overallfreq	rs17517238	G	C	0.0129524	0.00215159	1.6e-09
alcohol_overallfreq	rs66922686	A	T	0.0129524	0.00215159	1.6e-09
alcohol_overallfreq	rs7620313	C	T	0.0129364	0.0021535	1.7e-09
alcohol_overallfreq	rs1900918	C	A	0.012927	0.00215183	1.7e-09
alcohol_overallfreq	rs770563372	TATTTATTTATTTATTTATTTTTTATTTTTA	T	0.0131172	0.00216469	1.2e-09
alcohol_overallfreq	rs1900919	A	T	0.0129463	0.00215223	1.6e-09
alcohol_overallfreq	rs547374225	A	T	0.0129444	0.00215222	1.6e-09
alcohol_overallfreq	rs2326316	C	G	0.0127786	0.00215574	2.8e-09
alcohol_overallfreq	rs2326317	A	G	0.0129515	0.00215161	1.6e-09
alcohol_overallfreq	rs2326318	C	G	0.0128546	0.00215448	2.2e-09
alcohol_overallfreq	rs6790090	T	A	0.0129528	0.00215159	1.6e-09
alcohol_overallfreq	rs6777456	G	T	0.0129505	0.00215165	1.6e-09
alcohol_overallfreq	rs6777458	G	A	0.0129369	0.00215359	1.7e-09
alcohol_overallfreq	rs17517273	A	C	0.0129405	0.00215352	1.7e-09
alcohol_overallfreq	rs6780346	C	T	0.0133288	0.00215015	5e-10
alcohol_overallfreq	rs6804626	A	G	0.0129636	0.00215207	1.5e-09
alcohol_overallfreq	rs754620846	AAAG	A	0.0129681	0.00215478	1.6e-09
alcohol_overallfreq	rs7628948	C	T	-0.0162918	0.00248828	8.3e-11
alcohol_overallfreq	rs1449404	C	G	-0.0163033	0.00249111	8.4e-11
alcohol_overallfreq	rs6807666	A	C	0.0129161	0.00218054	3.2e-09
alcohol_overallfreq	rs11127899	A	G	0.0129461	0.0021535	1.6e-09
alcohol_overallfreq	rs11127900	A	G	0.0129453	0.00215349	1.7e-09
alcohol_overallfreq	rs10865610	A	G	0.0129178	0.00215356	1.8e-09
alcohol_overallfreq	rs1551045	A	C	0.0129561	0.00215167	1.6e-09
alcohol_overallfreq	rs1463203	A	T	0.0129457	0.0021535	1.6e-09
alcohol_overallfreq	rs1463204	T	C	0.0129457	0.0021535	1.6e-09
alcohol_overallfreq	rs1551046	G	C	0.0129457	0.0021535	1.6e-09
alcohol_overallfreq	rs13092437	A	T	-0.0162993	0.00249112	8.5e-11
alcohol_overallfreq	rs1551047	G	T	0.0129639	0.00215164	1.5e-09
alcohol_overallfreq	rs1551048	G	T	0.0129639	0.00215164	1.5e-09
alcohol_overallfreq	rs560704998	C	CA	0.0128286	0.00215113	2.2e-09
alcohol_overallfreq	rs6765881	A	G	0.0129455	0.0021535	1.7e-09
alcohol_overallfreq	rs142343184	A	AAT	0.012644	0.00215599	4.3e-09
alcohol_overallfreq	rs6765991	A	G	0.0129455	0.0021535	1.7e-09
alcohol_overallfreq	rs1463205	G	A	0.0129637	0.00215164	1.5e-09
alcohol_overallfreq	rs4502590	C	T	0.0129457	0.0021535	1.6e-09
alcohol_overallfreq	rs1463206	T	A	0.0129636	0.00215164	1.5e-09
alcohol_overallfreq	3:85596646_GA_G	GA	G	0.0128741	0.00216441	2.5e-09
alcohol_overallfreq	rs11712915	A	C	-0.0162885	0.00249114	8.7e-11
alcohol_overallfreq	rs1463207	C	T	0.0129636	0.00215164	1.5e-09
alcohol_overallfreq	rs1463208	C	A	0.0129599	0.00215164	1.5e-09
alcohol_overallfreq	rs4603966	T	C	0.0129601	0.00215164	1.5e-09
alcohol_overallfreq	rs62253964	C	T	0.0129601	0.00215164	1.5e-09
alcohol_overallfreq	rs62253965	G	A	0.0129613	0.00215167	1.5e-09
alcohol_overallfreq	rs2326319	G	A	0.0129388	0.00217859	2.9e-09
alcohol_overallfreq	rs2875908	T	C	0.0128867	0.00215532	2e-09
alcohol_overallfreq	rs139878143	G	GAAT	0.0128851	0.00216076	2.2e-09
alcohol_overallfreq	rs4856585	T	A	0.0129577	0.00215165	1.6e-09
alcohol_overallfreq	rs4856273	G	A	0.0129577	0.00215165	1.6e-09
alcohol_overallfreq	rs12714629	T	C	-0.0162564	0.00249094	9.5e-11
alcohol_overallfreq	rs6792295	T	C	0.0129187	0.00215348	1.8e-09
alcohol_overallfreq	rs6549033	A	T	0.012962	0.00215167	1.5e-09
alcohol_overallfreq	rs6549034	C	G	0.0129506	0.00215158	1.6e-09
alcohol_overallfreq	rs6549035	T	C	0.0129396	0.0021786	2.9e-09
alcohol_overallfreq	rs7637527	T	C	0.0129506	0.00215158	1.6e-09
alcohol_overallfreq	rs62253966	G	A	0.0129203	0.00215349	1.8e-09
alcohol_overallfreq	rs4301022	G	T	0.0129148	0.00215352	1.8e-09
alcohol_overallfreq	rs62253967	G	A	0.0128954	0.00218049	3.4e-09
alcohol_overallfreq	rs62253968	T	C	0.0128954	0.00218049	3.4e-09
alcohol_overallfreq	rs17458504	G	A	0.0130119	0.00215163	1.3e-09
alcohol_overallfreq	rs62253969	G	A	0.0129459	0.00215238	1.6e-09
alcohol_overallfreq	rs17518082	C	T	0.0129467	0.00215239	1.6e-09
alcohol_overallfreq	rs17458574	T	G	0.0129345	0.00215263	1.7e-09
alcohol_overallfreq	rs6783137	C	T	0.0129801	0.0021526	1.5e-09
alcohol_overallfreq	rs6783138	C	G	0.0129758	0.00215263	1.5e-09
alcohol_overallfreq	rs17458609	C	T	0.0129204	0.0021545	1.8e-09
alcohol_overallfreq	rs1449405	T	C	0.0129448	0.00215177	1.6e-09
alcohol_overallfreq	rs1449406	A	C	0.0129226	0.00215354	1.8e-09
alcohol_overallfreq	rs1449407	A	G	0.0129416	0.0021536	1.7e-09
alcohol_overallfreq	rs6549036	G	T	0.0129321	0.00215351	1.7e-09
alcohol_overallfreq	rs6549037	G	A	0.0129336	0.00215353	1.7e-09
alcohol_overallfreq	rs62253970	G	C	0.0129283	0.00215355	1.7e-09
alcohol_overallfreq	rs62253971	A	G	0.0129103	0.00215171	1.8e-09
alcohol_overallfreq	rs1449408	G	C	0.0129288	0.00215356	1.7e-09
alcohol_overallfreq	3:85601160_AG_A	AG	A	0.0129779	0.00215344	1.5e-09
alcohol_overallfreq	rs12492753	T	A	0.0128599	0.00217874	3.6e-09
alcohol_overallfreq	rs754061121	ATC	A	0.0130701	0.00218148	2e-09
alcohol_overallfreq	rs5850693	C	CT	0.0129876	0.0021524	1.4e-09
alcohol_overallfreq	rs2029131	A	C	0.0130473	0.00215498	1.3e-09
alcohol_overallfreq	3:85602677_AT_A	AT	A	0.012959	0.00215178	1.5e-09
alcohol_overallfreq	rs2029132	C	A	0.0129225	0.00215514	1.8e-09
alcohol_overallfreq	rs2029133	G	A	0.0129228	0.00215514	1.8e-09
alcohol_overallfreq	rs1449410	C	G	0.0129224	0.00215514	1.8e-09
alcohol_overallfreq	rs2029134	T	G	0.0128915	0.00218209	3.4e-09
alcohol_overallfreq	rs7618494	A	G	0.0127929	0.00217905	4.3e-09
alcohol_overallfreq	rs7640828	G	A	0.0128947	0.00218207	3.4e-09
alcohol_overallfreq	rs7652683	T	C	0.0129935	0.00218057	2.6e-09
alcohol_overallfreq	rs7652808	T	G	0.0129951	0.00218077	2.6e-09
alcohol_overallfreq	rs62250463	T	G	0.0129118	0.00215207	1.7e-09
alcohol_overallfreq	rs144639200	T	TCCTCCTACCTCAA	0.0129348	0.00215312	1.7e-09
alcohol_overallfreq	rs112438529	T	A	0.0126153	0.00215311	4.2e-09
alcohol_overallfreq	rs76084961	T	G	0.0125721	0.0021572	5.1e-09
alcohol_overallfreq	rs1375544	A	G	0.0128835	0.00215234	1.9e-09
alcohol_overallfreq	3:85604220_GA_G	GA	G	0.0131362	0.00215833	1.1e-09
alcohol_overallfreq	rs1375545	G	T	0.0128122	0.00215726	2.5e-09
alcohol_overallfreq	rs1375546	G	A	0.0128162	0.0021532	2.3e-09
alcohol_overallfreq	rs11713902	C	T	-0.0163485	0.00249069	7.6e-11
alcohol_overallfreq	rs72615726	G	A	0.0128354	0.00215315	2.2e-09
alcohol_overallfreq	rs17518584	C	T	0.0128166	0.00215647	2.5e-09
alcohol_overallfreq	rs67584463	T	A	0.0128161	0.00217932	4.1e-09
alcohol_overallfreq	rs66631011	G	A	0.0128211	0.00215643	2.4e-09
alcohol_overallfreq	rs68049270	C	T	0.0128211	0.00215643	2.4e-09
alcohol_overallfreq	rs73133799	T	C	0.0128791	0.002153	2e-09
alcohol_overallfreq	rs73133800	C	T	0.0128722	0.0021569	2.1e-09
alcohol_overallfreq	rs67568006	G	T	0.0128672	0.00215289	2e-09
alcohol_overallfreq	rs62250465	C	T	0.0128127	0.00215636	2.5e-09
alcohol_overallfreq	rs6549039	A	G	0.0128487	0.00215238	2.1e-09
alcohol_overallfreq	rs6549040	G	T	0.0128228	0.00215635	2.4e-09
alcohol_overallfreq	rs4856274	C	G	0.012797	0.00218337	4.5e-09
alcohol_overallfreq	rs4856275	C	A	0.0129013	0.0021531	1.8e-09
alcohol_overallfreq	rs4856586	T	G	0.0129013	0.0021531	1.8e-09
alcohol_overallfreq	rs543511529	G	GT	0.0129013	0.00215316	1.8e-09
alcohol_overallfreq	rs4856276	A	T	0.0129041	0.00215356	1.8e-09
alcohol_overallfreq	rs4856587	G	T	0.0129041	0.00215356	1.8e-09
alcohol_overallfreq	rs4856277	A	G	0.012846	0.00215246	2.1e-09
alcohol_overallfreq	rs67277278	C	A	0.0128199	0.00215641	2.4e-09
alcohol_overallfreq	rs4543024	T	C	0.0128198	0.00215641	2.4e-09
alcohol_overallfreq	rs68028504	A	G	0.0128452	0.00215245	2.1e-09
alcohol_overallfreq	rs4441668	A	G	0.0128452	0.00215245	2.1e-09
alcohol_overallfreq	rs1449370	C	T	0.0128199	0.00215641	2.4e-09
alcohol_overallfreq	rs66499081	A	G	0.0128212	0.00215635	2.4e-09
alcohol_overallfreq	rs1449371	T	C	0.0128212	0.00215635	2.4e-09
alcohol_overallfreq	rs66544515	G	A	0.0128557	0.00215238	2.1e-09
alcohol_overallfreq	rs7653790	G	T	0.0128229	0.00215635	2.4e-09
alcohol_overallfreq	rs1375547	G	A	-0.0164267	0.00254138	1.5e-10
alcohol_overallfreq	rs724304	A	C	0.0128254	0.00215636	2.4e-09
alcohol_overallfreq	rs1449372	T	G	0.0128543	0.00215238	2.1e-09
alcohol_overallfreq	rs1449373	G	A	0.0128229	0.00215635	2.4e-09
alcohol_overallfreq	rs1449374	C	T	0.0128229	0.00215635	2.4e-09
alcohol_overallfreq	rs1449375	G	T	0.0128555	0.00215237	2.1e-09
alcohol_overallfreq	rs780785949	ATC	A	0.012919	0.00215304	1.7e-09
alcohol_overallfreq	rs2167043	T	C	0.0128212	0.00215644	2.4e-09
alcohol_overallfreq	rs2167044	C	T	0.0128209	0.00215643	2.4e-09
alcohol_overallfreq	rs59073108	A	G	0.012821	0.00215643	2.4e-09
alcohol_overallfreq	rs62250467	T	C	0.012821	0.00215643	2.4e-09
alcohol_overallfreq	rs17459563	G	A	0.0128222	0.00215642	2.4e-09
alcohol_overallfreq	rs72615727	G	C	0.0128886	0.00215312	1.9e-09
alcohol_overallfreq	rs77852438	C	T	0.0128866	0.00215298	1.9e-09
alcohol_overallfreq	rs78288623	C	A	0.0128866	0.00215298	1.9e-09
alcohol_overallfreq	rs1449378	C	T	0.0128103	0.00215637	2.5e-09
alcohol_overallfreq	rs1449379	T	C	0.0128381	0.00215249	2.2e-09
alcohol_overallfreq	rs1530738	A	G	0.012823	0.00215635	2.4e-09
alcohol_overallfreq	rs1530739	T	A	0.0128389	0.00215241	2.2e-09
alcohol_overallfreq	rs9825916	C	A	-0.0161805	0.00249247	1.2e-10
alcohol_overallfreq	3:85610384_GTTTA_G	GTTTA	G	0.0128976	0.00215899	2e-09
alcohol_overallfreq	rs1530740	G	A	0.0128252	0.00215634	2.4e-09
alcohol_overallfreq	rs17519241	C	T	0.0128228	0.00215635	2.4e-09
alcohol_overallfreq	rs62250468	C	T	0.0128386	0.00215241	2.2e-09
alcohol_overallfreq	rs17519262	A	G	0.0128402	0.00215248	2.1e-09
alcohol_overallfreq	rs60541362	A	G	0.0127999	0.00218342	4.5e-09
alcohol_overallfreq	rs78015688	T	G	0.0129195	0.00215308	1.7e-09
alcohol_overallfreq	rs2167045	G	A	0.012841	0.0021524	2.1e-09
alcohol_overallfreq	rs2122233	G	A	0.0128252	0.00215634	2.4e-09
alcohol_overallfreq	rs2122234	G	A	0.012841	0.0021524	2.1e-09
alcohol_overallfreq	rs4856588	G	A	0.0128252	0.00215634	2.4e-09
alcohol_overallfreq	rs4856589	A	G	0.0128253	0.00215634	2.4e-09
alcohol_overallfreq	rs1900914	G	A	0.0128253	0.00215634	2.4e-09
alcohol_overallfreq	rs1449380	C	T	0.0128252	0.00215634	2.4e-09
alcohol_overallfreq	rs1449381	A	G	0.0128549	0.00215245	2.1e-09
alcohol_overallfreq	rs1449382	G	A	0.0128279	0.0021564	2.4e-09
alcohol_overallfreq	rs4856590	G	A	0.0128192	0.00215647	2.4e-09
alcohol_overallfreq	rs17459906	T	C	0.0128685	0.00215246	2e-09
[truncated: 93,916 more rows]

## Sheet: macronutrients
Supplementary Table 2.2 GWAS summary data of food type at P-value<5.0×10-8
Food type	rsID	effect_allele	other_allele	Beta	SE	P-value	N
Carbohydrate	rs2472297	T	C	-0.01795	0.00326	3.727e-08	244000
Carbohydrate	rs9937053	A	G	-0.01544	0.00278	2.927e-08	264000
Carbohydrate	rs9937354	A	G	-0.01537	0.00278	3.256e-08	264000
Carbohydrate	rs9928094	A	G	0.01544	0.00278	2.91e-08	264000
Carbohydrate	rs9930333	T	G	0.01777	0.00316	1.931e-08	205000
Carbohydrate	rs9930397	A	T	-0.01558	0.00278	2.137e-08	264000
Carbohydrate	rs9940278	T	C	-0.01557	0.00278	2.195e-08	264000
Carbohydrate	rs9939973	A	G	-0.01558	0.00278	2.192e-08	264000
Carbohydrate	rs9940646	C	G	0.01558	0.00278	2.154e-08	264000
Carbohydrate	rs9940128	A	G	-0.0157	0.00278	1.69e-08	264000
Carbohydrate	rs1421085	T	C	0.01717	0.0028	9.099e-10	264000
Carbohydrate	rs1421086	A	C	-0.01564	0.00278	1.873e-08	264000
Carbohydrate	rs9923147	T	C	-0.01569	0.00278	1.709e-08	264000
Carbohydrate	rs9923544	T	C	-0.01566	0.00278	1.827e-08	264000
Carbohydrate	rs11642015	T	C	-0.01732	0.0028	6.17e-10	264000
Carbohydrate	rs1558901	A	T	0.01571	0.00278	1.643e-08	264000
Carbohydrate	rs62048402	A	G	-0.01732	0.0028	6.139e-10	264000
Carbohydrate	rs1558902	A	T	-0.0172	0.0028	8.516e-10	264000
Carbohydrate	rs11075985	A	C	-0.01554	0.00278	2.371e-08	264000
Carbohydrate	rs56094641	A	G	0.01715	0.0028	8.988e-10	264000
Carbohydrate	rs55872725	T	C	-0.01745	0.0028	4.653e-10	264000
Carbohydrate	rs1121980	A	G	-0.0158	0.00278	1.383e-08	264000
Carbohydrate	rs7187250	A	C	-0.01756	0.00281	4.215e-10	264000
Carbohydrate	rs7193144	T	C	0.01759	0.00281	4.055e-10	264000
Carbohydrate	rs62033399	T	C	-0.01769	0.00281	3.113e-10	264000
Carbohydrate	rs62033400	A	G	0.01761	0.00281	3.819e-10	264000
Carbohydrate	rs8063057	T	C	0.01754	0.00281	4.29e-10	264000
Carbohydrate	rs17817449	T	G	0.01767	0.00281	3.381e-10	264000
Carbohydrate	rs8043757	A	T	0.01765	0.00281	3.516e-10	264000
Carbohydrate	rs9972653	T	G	-0.01766	0.00281	3.202e-10	264000
Carbohydrate	rs17817497	T	C	0.01775	0.00281	2.769e-10	264000
Carbohydrate	rs8050136	A	C	-0.01751	0.00281	4.89e-10	264000
Carbohydrate	rs8051591	A	G	0.01767	0.00281	3.395e-10	264000
Carbohydrate	rs9935401	A	G	-0.01758	0.00281	4.118e-10	264000
Carbohydrate	rs9933509	T	C	0.01594	0.00279	1.132e-08	264000
Carbohydrate	rs3751812	T	G	-0.01766	0.00281	3.502e-10	264000
Carbohydrate	rs3751814	A	G	-0.01763	0.00281	3.594e-10	264000
Carbohydrate	rs9931900	A	G	0.01602	0.00279	9.602e-09	264000
Carbohydrate	rs56313538	A	G	0.01766	0.00281	3.354e-10	264000
Carbohydrate	rs9936385	T	C	0.01764	0.00282	3.703e-10	264000
Carbohydrate	rs9923233	C	G	-0.01776	0.00281	2.696e-10	264000
Carbohydrate	rs9923312	A	G	-0.01765	0.00281	3.431e-10	264000
Carbohydrate	rs11075988	A	G	-0.01767	0.00281	3.254e-10	264000
Carbohydrate	rs11075989	T	C	-0.01767	0.00281	3.369e-10	264000
Carbohydrate	rs11075990	A	G	0.01767	0.00281	3.356e-10	264000
Carbohydrate	rs11075991	A	T	0.01766	0.00281	3.354e-10	264000
Carbohydrate	rs11075992	T	C	0.01767	0.00281	3.26e-10	264000
Carbohydrate	rs9926289	A	G	-0.01767	0.00281	3.302e-10	264000
Carbohydrate	rs9939609	A	T	-0.01764	0.00281	3.595e-10	264000
Carbohydrate	rs9937709	A	G	0.01602	0.00279	9.562e-09	264000
Carbohydrate	rs9927317	C	G	0.01983	0.0035	1.491e-08	171000
Carbohydrate	rs17817712	A	G	0.01774	0.00281	2.882e-10	264000
Carbohydrate	rs7206410	T	C	0.01774	0.00281	2.803e-10	264000
Carbohydrate	rs7206629	T	C	0.01609	0.00279	8.17e-09	264000
Carbohydrate	rs7202116	A	G	0.0177	0.00281	3.136e-10	264000
Carbohydrate	rs7202296	A	G	0.01772	0.00281	2.908e-10	264000
Carbohydrate	rs7201850	T	C	-0.01618	0.00279	6.839e-09	264000
Carbohydrate	rs66908032	A	C	-0.01769	0.00281	3.138e-10	264000
Carbohydrate	rs72803697	T	C	-0.01771	0.00281	2.972e-10	264000
Carbohydrate	rs62033403	A	G	0.01773	0.00281	2.885e-10	264000
Carbohydrate	rs62033404	A	G	0.01772	0.00281	2.93e-10	264000
Carbohydrate	rs62033405	T	C	-0.01778	0.00281	2.626e-10	264000
Carbohydrate	rs7206122	A	G	-0.01766	0.00281	3.331e-10	264000
Carbohydrate	rs7190396	T	G	0.01781	0.00281	2.393e-10	264000
Carbohydrate	rs7185735	A	G	0.01773	0.00281	2.947e-10	264000
Carbohydrate	rs79994966	T	C	0.01772	0.00281	3.002e-10	264000
Carbohydrate	rs11646715	A	G	-0.01588	0.00275	8.181e-09	264000
Carbohydrate	rs62033406	A	G	0.01666	0.00279	2.466e-09	264000
Carbohydrate	rs9941349	T	C	-0.01645	0.00279	3.888e-09	264000
Carbohydrate	rs28567725	T	C	0.01624	0.00279	6.051e-09	264000
Carbohydrate	rs9931494	C	G	0.01623	0.00279	6.159e-09	264000
Carbohydrate	rs10468280	A	G	0.01777	0.00281	2.661e-10	264000
Carbohydrate	rs62033408	A	G	0.01774	0.00281	2.875e-10	264000
Carbohydrate	rs17817964	T	C	-0.01769	0.00281	3.297e-10	264000
Carbohydrate	rs62033413	C	G	0.01643	0.00279	4.125e-09	264000
Carbohydrate	rs9930506	A	G	0.01518	0.00278	4.559e-08	264000
Carbohydrate	rs72805611	T	C	-0.0165	0.00279	3.546e-09	264000
Carbohydrate	rs7188250	T	C	0.01598	0.00279	1.061e-08	264000
Carbohydrate	rs72805612	A	G	-0.01628	0.0028	5.76e-09	264000
Carbohydrate	rs11075993	T	G	-0.01643	0.00279	4.105e-09	264000
Carbohydrate	rs72805613	A	G	0.01635	0.00279	4.834e-09	264000
Carbohydrate	rs12149574	C	G	0.01632	0.00279	5.139e-09	264000
Carbohydrate	rs12149832	A	G	-0.01649	0.00279	3.571e-09	264000
Carbohydrate	rs11649091	T	G	0.01638	0.00278	3.734e-09	264000
Carbohydrate	rs11642841	A	C	-0.01622	0.00288	1.757e-08	251000
Carbohydrate	rs1104608	C	G	0.01847	0.00289	1.737e-10	245000
Carbohydrate	rs56328224	T	C	0.01918	0.00348	3.675e-08	235000
Carbohydrate	rs1724390	A	C	0.01903	0.00347	4.277e-08	235000
Carbohydrate	rs7502280	T	G	-0.02875	0.00504	1.149e-08	171000
Carbohydrate	rs76927677	A	T	-0.02253	0.00411	4.095e-08	171000
Carbohydrate	rs78803763	A	C	0.02239	0.00411	4.997e-08	171000
Carbohydrate	rs55938136	A	G	-0.02243	0.00411	4.772e-08	171000
Carbohydrate	rs2668632	T	C	0.02205	0.00388	1.343e-08	192000
Carbohydrate	rs2696541	A	G	0.02116	0.00377	1.934e-08	217000
Carbohydrate	rs2732703	T	G	-0.02418	0.00428	1.605e-08	171000
Carbohydrate	rs36123991	T	G	0.0213	0.00369	8.238e-09	224000
Carbohydrate	rs2732607	A	G	-0.02474	0.00437	1.491e-08	171000
Carbohydrate	rs2957297	A	C	0.02083	0.00377	3.303e-08	224000
Carbohydrate	rs2732600	C	G	-0.02473	0.00439	1.832e-08	171000
Carbohydrate	rs67422659	A	G	0.02095	0.0038	3.433e-08	264000
Carbohydrate	rs1371274	A	C	0.02288	0.004	1.036e-08	264000
Carbohydrate	rs1371273	A	G	-0.02298	0.004	9.412e-09	264000
Carbohydrate	rs1371272	A	G	-0.02279	0.00399	1.157e-08	264000
Carbohydrate	rs72867237	A	T	0.0229	0.00401	1.085e-08	264000
Carbohydrate	rs9955276	T	C	-0.02331	0.00391	2.588e-09	264000
Carbohydrate	rs8097544	A	G	0.02338	0.00391	2.169e-09	264000
Carbohydrate	rs8097672	A	T	0.02346	0.00391	1.949e-09	264000
Carbohydrate	rs60764613	T	G	-0.02332	0.00391	2.484e-09	264000
Carbohydrate	rs7238896	A	G	0.0219	0.00396	3.329e-08	264000
Carbohydrate	rs9958909	T	G	0.02205	0.00398	2.947e-08	264000
Carbohydrate	rs8091804	T	C	0.02197	0.00398	3.372e-08	264000
Carbohydrate	rs9964229	T	C	-0.02171	0.00382	1.359e-08	264000
Carbohydrate	rs7243676	A	G	-0.02084	0.00382	4.956e-08	264000
Carbohydrate	rs7226371	A	G	0.02096	0.00382	4.167e-08	264000
Carbohydrate	rs55960823	C	G	0.02765	0.00482	9.781e-09	171000
Carbohydrate	rs12972156	C	G	-0.02294	0.00397	7.313e-09	258000
Carbohydrate	rs12972970	A	G	0.02277	0.00397	9.355e-09	258000
Carbohydrate	rs34342646	A	G	0.02311	0.00393	4.139e-09	258000
Carbohydrate	rs283815	A	G	-0.01945	0.0034	1.057e-08	258000
Carbohydrate	rs6857	T	C	0.02508	0.00379	3.601e-11	253000
Carbohydrate	rs71352238	T	C	-0.02309	0.00396	5.63e-09	258000
Carbohydrate	rs184017	T	G	-0.01892	0.0034	2.602e-08	258000
Carbohydrate	rs2075650	A	G	-0.0225	0.00401	2.083e-08	253000
Carbohydrate	rs157581	T	C	-0.01909	0.00339	1.814e-08	258000
Carbohydrate	rs34404554	C	G	-0.02257	0.00399	1.545e-08	258000
Carbohydrate	rs11556505	T	C	0.02256	0.00399	1.566e-08	258000
Carbohydrate	rs157582	T	C	0.01934	0.00343	1.766e-08	253000
Carbohydrate	rs769449	A	G	0.0258	0.00424	1.179e-09	258000
Carbohydrate	rs429358	T	C	-0.02698	0.00388	3.493e-12	258000
Carbohydrate	rs10414043	A	G	0.02617	0.00421	4.922e-10	258000
Carbohydrate	rs7256200	T	G	0.02591	0.0042	7.05e-10	258000
Carbohydrate	rs12721046	A	G	0.02163	0.00393	3.742e-08	245000
Carbohydrate	rs12721051	C	G	-0.02314	0.00367	2.787e-10	245000
Carbohydrate	rs56131196	A	G	0.02312	0.00366	2.761e-10	245000
Carbohydrate	rs4420638	A	G	-0.02415	0.00372	8.849e-11	239000
Carbohydrate	rs35106244	T	C	0.01853	0.00296	3.633e-10	231000
Carbohydrate	rs679574	C	G	-0.01817	0.00278	6.614e-11	258000
Carbohydrate	rs516316	C	G	0.01823	0.00278	5.752e-11	258000
Carbohydrate	rs516246	T	C	0.01819	0.00278	6.272e-11	258000
Carbohydrate	rs492602	A	G	-0.01807	0.00278	8.43e-11	258000
Carbohydrate	rs681343	T	C	0.01796	0.00278	1.09e-10	258000
Carbohydrate	rs281377	T	C	-0.01615	0.0028	8.41e-09	258000
Carbohydrate	rs601338	A	G	0.0182	0.00278	6.135e-11	258000
Carbohydrate	rs602662	A	G	0.01877	0.00279	1.602e-11	258000
Carbohydrate	rs485186	A	G	-0.01885	0.00279	1.326e-11	258000
Carbohydrate	rs485073	A	G	-0.01891	0.00279	1.113e-11	258000
Carbohydrate	rs603985	T	C	-0.01884	0.00279	1.32e-11	258000
Carbohydrate	rs571689	T	C	0.01885	0.00278	1.299e-11	258000
Carbohydrate	rs570794	T	C	-0.01881	0.00278	1.412e-11	258000
Carbohydrate	rs569970	T	C	-0.02016	0.00299	1.48e-11	225000
Carbohydrate	rs2251034	A	G	0.01897	0.00278	9.434e-12	258000
Carbohydrate	rs507855	A	G	-0.01868	0.00278	1.942e-11	258000
Carbohydrate	rs507766	T	C	-0.0188	0.00279	1.477e-11	258000
Carbohydrate	rs507711	T	C	0.01874	0.00278	1.683e-11	258000
Carbohydrate	rs506897	C	G	0.01887	0.00278	1.209e-11	258000
Carbohydrate	rs504963	A	G	0.01913	0.00279	6.409e-12	258000
Carbohydrate	rs632111	A	G	-0.01917	0.00279	5.763e-12	258000
Carbohydrate	rs503279	T	C	-0.01897	0.00279	9.659e-12	258000
Carbohydrate	rs633372	A	G	0.01911	0.00279	6.886e-12	258000
Carbohydrate	rs2548459	T	C	-0.01901	0.00278	8.756e-12	258000
Carbohydrate	rs692854	A	C	0.01935	0.00278	3.651e-12	258000
Carbohydrate	rs1704773	A	G	-0.01953	0.00278	2.316e-12	258000
Carbohydrate	rs646327	A	G	-0.02038	0.00278	2.479e-13	258000
Carbohydrate	rs2638281	A	G	-0.01567	0.00282	2.909e-08	258000
Carbohydrate	rs676388	T	C	-0.01975	0.00279	1.343e-12	258000
Carbohydrate	rs584768	A	G	0.02009	0.00278	5.413e-13	258000
Carbohydrate	rs2452170	A	G	0.0201	0.00278	5.329e-13	258000
Carbohydrate	rs2638282	A	G	0.0201	0.00278	5.305e-13	258000
Carbohydrate	rs281379	A	G	0.01999	0.00278	6.897e-13	258000
Carbohydrate	rs4002471	T	C	0.02218	0.00279	1.846e-15	258000
Carbohydrate	rs35866622	T	C	0.02122	0.00279	2.682e-14	258000
Carbohydrate	rs33988101	T	G	0.0227	0.00276	1.909e-16	264000
Carbohydrate	rs12978750	A	G	-0.02269	0.00276	1.973e-16	264000
Carbohydrate	rs12978752	A	C	-0.0227	0.00276	1.903e-16	264000
Carbohydrate	rs12979278	T	C	0.0224	0.00276	4.661e-16	264000
Carbohydrate	rs660745	T	C	-0.02204	0.00276	1.358e-15	264000
Carbohydrate	rs11672900	A	G	-0.02244	0.00276	4.035e-16	264000
Carbohydrate	rs281395	C	G	0.01658	0.00291	1.232e-08	261000
Carbohydrate	rs281394	C	G	0.01654	0.00289	1.06e-08	264000
Carbohydrate	rs546308	A	G	0.01741	0.0028	4.862e-10	264000
Carbohydrate	rs629504	C	G	-0.01742	0.0028	4.821e-10	264000
Carbohydrate	rs3859439	T	C	-0.01741	0.0028	4.973e-10	264000
Carbohydrate	rs281393	T	C	-0.01681	0.0029	6.482e-09	264000
Carbohydrate	rs519757	A	C	-0.01716	0.0028	8.664e-10	264000
Carbohydrate	rs11882796	A	T	-0.02222	0.00276	7.548e-16	264000
Carbohydrate	rs11666792	A	G	0.02269	0.00275	1.78e-16	264000
Carbohydrate	rs12979891	T	C	0.02266	0.00275	1.948e-16	264000
Carbohydrate	rs11878908	T	C	0.02252	0.00275	2.943e-16	264000
Carbohydrate	rs2287921	T	C	-0.02253	0.00276	2.899e-16	264000
Carbohydrate	rs479486	A	G	0.02167	0.00276	4.075e-15	264000
Carbohydrate	rs8112983	T	C	-0.02256	0.00275	2.633e-16	264000
Carbohydrate	rs2287922	A	G	0.02263	0.00275	2.068e-16	264000
Carbohydrate	rs281407	A	G	-0.01678	0.00303	3.2e-08	250000
Carbohydrate	rs281408	A	C	-0.02092	0.00279	6.1e-14	264000
Carbohydrate	rs412712	A	T	0.02087	0.00279	6.822e-14	264000
Carbohydrate	rs439523	T	C	-0.02227	0.00275	6.105e-16	264000
Carbohydrate	rs12979144	A	G	-0.02136	0.00279	1.742e-14	264000
Carbohydrate	rs12978499	A	C	0.0214	0.00279	1.575e-14	264000
Carbohydrate	rs418464	T	C	-0.02285	0.00275	1.039e-16	264000
Carbohydrate	rs452270	T	C	-0.02334	0.00299	5.97e-15	224000
Carbohydrate	rs1231281	A	G	0.02256	0.00275	2.519e-16	264000
Carbohydrate	rs12981072	C	G	0.02078	0.00277	6.718e-14	264000
Carbohydrate	rs380743	A	G	0.02305	0.00279	1.445e-16	257000
Carbohydrate	rs427248	T	C	0.0231	0.00279	1.24e-16	257000
Carbohydrate	rs56066508	T	C	-0.02072	0.00277	8.02e-14	264000
Carbohydrate	rs973579	A	G	-0.02254	0.00275	2.643e-16	264000
Carbohydrate	rs2307018	A	C	-0.01998	0.00278	6.402e-13	264000
Carbohydrate	rs2307019	A	G	-0.01979	0.00278	1.058e-12	264000
Carbohydrate	rs838147	A	G	0.02287	0.00275	9.784e-17	264000
Carbohydrate	rs12462324	A	G	0.02048	0.00278	1.628e-13	264000
Carbohydrate	rs12460295	T	G	0.02048	0.00278	1.607e-13	264000
Carbohydrate	rs11672046	T	C	-0.02052	0.00278	1.456e-13	264000
Carbohydrate	rs8108136	T	C	-0.02047	0.00278	1.696e-13	264000
Carbohydrate	rs8108468	A	G	-0.02046	0.00278	1.719e-13	264000
Carbohydrate	rs8111288	A	G	-0.02041	0.00278	1.931e-13	264000
Carbohydrate	rs8111399	T	G	-0.02041	0.00278	1.945e-13	264000
Carbohydrate	rs8111208	A	C	0.02035	0.00278	2.306e-13	264000
Carbohydrate	rs11083948	A	G	0.02039	0.00278	2.053e-13	264000
Carbohydrate	rs12611201	A	G	-0.02047	0.00278	1.711e-13	264000
Carbohydrate	rs12611203	A	G	-0.02049	0.00278	1.637e-13	264000
Carbohydrate	rs12611211	A	G	-0.02053	0.00278	1.447e-13	264000
Carbohydrate	rs12982115	A	G	0.02049	0.00278	1.591e-13	264000
Carbohydrate	rs838145	A	G	-0.02286	0.0028	3.383e-16	257000
Carbohydrate	rs12975033	A	T	0.02029	0.00278	2.764e-13	264000
Carbohydrate	rs12975781	T	C	-0.01773	0.00286	5.56e-10	256000
Carbohydrate	rs8102032	T	C	-0.02041	0.00278	1.991e-13	264000
Carbohydrate	rs8104897	A	C	-0.02051	0.00278	1.542e-13	264000
Carbohydrate	rs8105137	A	G	-0.02051	0.00278	1.538e-13	264000
Carbohydrate	rs8106205	T	C	0.02209	0.00277	1.441e-15	264000
Carbohydrate	rs838144	T	C	-0.02323	0.00275	3.261e-17	264000
Carbohydrate	rs11667321	A	G	0.02211	0.00277	1.35e-15	264000
Carbohydrate	rs28400015	A	G	-0.02057	0.00278	1.283e-13	264000
Carbohydrate	rs28400014	C	G	0.02205	0.00277	1.566e-15	264000
Carbohydrate	rs838140	T	C	-0.01758	0.00321	4.433e-08	252000
Carbohydrate	rs8103840	T	C	-0.02331	0.00283	1.609e-16	251000
Carbohydrate	rs838133	A	G	0.02339	0.00301	8.436e-15	223000
Carbohydrate	rs739320	T	C	0.02303	0.0034	1.323e-11	181000
Carbohydrate	rs2081194	C	G	-0.02094	0.0034	6.999e-10	181000
Carbohydrate	rs499765	C	G	0.02096	0.00317	4.057e-11	222000
Carbohydrate	rs637174	A	G	-0.02024	0.00317	1.779e-10	222000
Carbohydrate	rs837629	C	G	0.01946	0.00316	7.757e-10	222000
Carbohydrate	rs669789	T	C	0.01923	0.00316	1.2e-09	222000
Carbohydrate	rs28567372	T	G	0.01731	0.00314	3.484e-08	222000
Carbohydrate	rs4802503	A	G	0.0172	0.00302	1.268e-08	222000
Carbohydrate	rs10206338	A	G	-0.01577	0.00279	1.516e-08	264000
Carbohydrate	rs4858693	A	G	-0.01607	0.00283	1.319e-08	256000
Carbohydrate	rs1603993	A	T	0.01685	0.00278	1.44e-09	264000
Carbohydrate	rs9847186	A	G	0.01707	0.00278	8.442e-10	264000
Carbohydrate	rs6550938	T	C	-0.01574	0.00283	2.536e-08	251000
Carbohydrate	rs7618975	A	C	-0.01797	0.00282	1.974e-10	264000
Carbohydrate	rs35779991	T	C	0.01783	0.00276	1.028e-10	264000
Carbohydrate	rs6786779	A	G	0.0174	0.00318	4.663e-08	264000
Carbohydrate	rs6550939	T	C	0.01739	0.00318	4.729e-08	264000
Carbohydrate	rs6550940	T	C	-0.01715	0.00309	2.979e-08	264000
Carbohydrate	rs6550941	A	G	-0.017	0.00309	3.658e-08	264000
Carbohydrate	rs9820537	T	C	0.01691	0.00309	4.646e-08	264000
Carbohydrate	rs9310769	A	T	-0.01743	0.00318	4.389e-08	264000
Carbohydrate	rs12639346	T	G	-0.01698	0.00309	3.895e-08	264000
Carbohydrate	rs1609783	A	G	-0.01781	0.00276	1.098e-10	264000
Carbohydrate	rs9823025	A	G	-0.01707	0.00308	3.025e-08	264000
Carbohydrate	rs4858694	A	G	0.01826	0.00302	1.56e-09	264000
Carbohydrate	rs4858695	T	C	0.01733	0.00309	2.037e-08	264000
Carbohydrate	rs11129178	T	C	0.01699	0.00309	3.89e-08	264000
Carbohydrate	rs10510554	T	C	0.01942	0.00278	2.939e-12	264000
Carbohydrate	rs4858696	T	C	-0.0182	0.00278	5.683e-11	264000
Carbohydrate	rs12632128	T	G	-0.01884	0.00278	1.205e-11	264000
Carbohydrate	rs12715065	A	T	-0.01754	0.00302	6.297e-09	264000
Carbohydrate	rs6804842	A	G	0.0192	0.00279	5.427e-12	264000
Carbohydrate	rs6767671	T	G	-0.01871	0.00278	1.666e-11	264000
Carbohydrate	rs6808550	A	G	0.01902	0.00278	8.088e-12	264000
Carbohydrate	rs1603977	A	T	-0.017	0.003	1.457e-08	264000
Carbohydrate	rs1603978	A	C	-0.01675	0.00298	2.021e-08	264000
Carbohydrate	rs7619139	A	T	-0.01951	0.0028	3.237e-12	264000
Carbohydrate	rs992844	C	G	0.01773	0.00307	8.022e-09	264000
Carbohydrate	rs6791983	A	C	-0.01815	0.00319	1.246e-08	264000
Carbohydrate	rs993803	T	C	-0.01756	0.00307	1.085e-08	264000
Carbohydrate	rs993804	T	C	-0.01816	0.00319	1.198e-08	264000
Carbohydrate	rs993805	T	C	-0.0176	0.00307	9.92e-09	264000
Carbohydrate	rs11715684	C	G	-0.01764	0.00308	9.816e-09	264000
Carbohydrate	rs4858697	A	G	0.01934	0.00279	4.441e-12	264000
Carbohydrate	rs7429279	A	C	0.01937	0.0028	4.545e-12	264000
Carbohydrate	rs12629972	T	C	0.01913	0.0028	8.108e-12	264000
Carbohydrate	rs12638455	A	C	-0.01871	0.00279	1.933e-11	264000
Carbohydrate	rs12630658	T	C	0.0185	0.00279	3.311e-11	264000
Carbohydrate	rs4353774	A	C	0.01776	0.00283	3.464e-10	264000
Carbohydrate	rs1865250	T	C	-0.01556	0.00283	3.879e-08	264000
Carbohydrate	rs11929525	T	C	-0.01556	0.00283	3.953e-08	264000
Carbohydrate	rs1897699	A	T	-0.01549	0.00283	4.588e-08	264000
Carbohydrate	rs2082556	A	G	0.01551	0.00283	4.291e-08	264000
Carbohydrate	rs993137	T	C	0.01555	0.00283	3.953e-08	264000
Carbohydrate	rs62250711	A	T	-0.01548	0.00283	4.668e-08	264000
Carbohydrate	rs6774985	T	C	-0.01549	0.00283	4.61e-08	264000
Carbohydrate	rs6762267	A	C	0.01585	0.00283	2.2e-08	264000
Carbohydrate	rs62250712	T	C	0.01575	0.00283	2.632e-08	264000
Carbohydrate	rs62250714	A	G	0.01553	0.00285	4.937e-08	264000
Carbohydrate	rs62250715	A	G	0.01554	0.00285	4.81e-08	264000
Carbohydrate	rs1368750	T	C	-0.01566	0.00285	3.75e-08	264000
Carbohydrate	rs1155666	T	C	-0.01574	0.00285	3.164e-08	264000
Carbohydrate	rs2069123	T	G	-0.01576	0.00284	2.96e-08	264000
Carbohydrate	rs67336646	A	T	0.01577	0.00285	3.021e-08	264000
Carbohydrate	rs7621381	C	G	-0.01567	0.00285	3.622e-08	264000
Carbohydrate	rs1542248	A	G	0.01569	0.00284	3.452e-08	264000
Carbohydrate	rs7614148	A	G	0.01569	0.00284	3.433e-08	264000
Carbohydrate	rs62250719	T	G	0.01574	0.00285	3.152e-08	264000
Carbohydrate	rs10511085	A	C	0.0158	0.00284	2.764e-08	264000
Carbohydrate	rs17515196	A	G	0.01577	0.00285	3.007e-08	264000
Carbohydrate	rs11127895	T	G	-0.01568	0.00285	3.59e-08	264000
Carbohydrate	rs11127896	T	C	0.01567	0.00284	3.597e-08	264000
Carbohydrate	rs1551043	T	G	0.01572	0.00285	3.291e-08	264000
Carbohydrate	rs10433500	A	G	0.01608	0.00286	1.961e-08	264000
Carbohydrate	rs7618429	A	G	-0.01571	0.00284	3.312e-08	264000
Carbohydrate	rs62250750	T	C	-0.01566	0.00285	3.765e-08	264000
Carbohydrate	rs1449391	T	G	0.01573	0.00284	3.154e-08	264000
Carbohydrate	rs62250754	T	G	0.0157	0.00285	3.431e-08	264000
Carbohydrate	rs6804845	A	C	-0.01564	0.00284	3.745e-08	264000
Carbohydrate	rs62250758	T	G	0.01559	0.00285	4.27e-08	264000
Carbohydrate	rs1375560	T	G	0.01562	0.00285	4.055e-08	264000
Carbohydrate	rs17515586	A	G	-0.01566	0.00284	3.665e-08	264000
Carbohydrate	rs10511083	A	G	-0.01562	0.00284	3.921e-08	264000
Carbohydrate	rs6764988	A	C	-0.01555	0.00285	4.612e-08	264000
Carbohydrate	rs1868532	T	C	0.01565	0.00284	3.734e-08	264000
Carbohydrate	rs1449393	T	C	0.01567	0.00285	3.676e-08	264000
Carbohydrate	rs1449394	T	C	0.01559	0.00285	4.257e-08	264000
Carbohydrate	rs4856579	T	C	-0.01567	0.00285	3.675e-08	264000
Carbohydrate	rs4856580	A	T	0.01567	0.00285	3.674e-08	264000
Carbohydrate	rs58828944	T	C	-0.01561	0.00285	4.157e-08	264000
Carbohydrate	rs62252462	A	G	0.01559	0.00285	4.247e-08	264000
Carbohydrate	rs62252463	A	G	0.01561	0.00285	4.157e-08	264000
Carbohydrate	rs62252464	A	G	-0.01559	0.00285	4.309e-08	264000
Carbohydrate	rs62252465	T	C	0.01559	0.00285	4.31e-08	264000
Carbohydrate	rs62252466	A	G	-0.01561	0.00285	4.155e-08	264000
Carbohydrate	rs62252467	C	G	0.01559	0.00285	4.31e-08	264000
Carbohydrate	rs1470635	T	C	0.01569	0.00284	3.439e-08	264000
Carbohydrate	rs1470636	A	C	-0.01553	0.00285	4.834e-08	264000
Carbohydrate	rs7427346	T	C	-0.01567	0.00285	3.686e-08	264000
Carbohydrate	rs35738543	T	G	-0.01561	0.00285	4.165e-08	264000
Carbohydrate	rs17456263	A	C	0.01559	0.00285	4.244e-08	264000
Carbohydrate	rs35701422	T	C	-0.01581	0.00285	2.749e-08	264000
Carbohydrate	rs59967234	A	G	-0.01567	0.00285	3.666e-08	264000
Carbohydrate	rs59225869	A	G	-0.01559	0.00285	4.243e-08	264000
Carbohydrate	rs60427790	T	C	-0.01559	0.00285	4.257e-08	264000
Carbohydrate	rs56778912	T	C	0.01559	0.00285	4.257e-08	264000
Carbohydrate	rs66505109	A	C	-0.01561	0.00285	4.154e-08	264000
Carbohydrate	rs56777875	A	G	0.01558	0.00285	4.379e-08	264000
Carbohydrate	rs4856581	A	G	0.01572	0.00285	3.316e-08	264000
Carbohydrate	rs4856583	A	G	-0.01562	0.00285	4.071e-08	264000
Carbohydrate	rs1449389	A	G	-0.01571	0.00285	3.36e-08	264000
Carbohydrate	rs57671246	C	G	-0.01562	0.00285	4.007e-08	264000
Carbohydrate	rs1449390	A	G	0.01572	0.00284	3.19e-08	264000
Carbohydrate	rs55939743	A	G	0.01575	0.00285	3.138e-08	264000
Carbohydrate	rs62252495	A	G	0.01564	0.00285	3.852e-08	264000
Carbohydrate	rs62252496	A	G	0.01574	0.00285	3.209e-08	264000
Carbohydrate	rs62252497	T	C	0.01566	0.00285	3.733e-08	264000
Carbohydrate	rs56187922	A	C	0.01566	0.00285	3.744e-08	264000
Carbohydrate	rs17516256	A	G	0.01581	0.00284	2.685e-08	264000
Carbohydrate	rs11923525	A	G	0.01551	0.00284	4.783e-08	264000
Carbohydrate	rs77657121	A	G	0.01561	0.00284	4.048e-08	264000
Carbohydrate	rs17516284	A	G	0.01568	0.00284	3.465e-08	264000
Carbohydrate	rs62252503	C	G	0.01565	0.00285	3.751e-08	264000
Carbohydrate	rs62252505	T	C	0.01565	0.00285	3.821e-08	264000
Carbohydrate	rs62252506	T	C	-0.01555	0.00284	4.566e-08	264000
Carbohydrate	rs62252507	T	C	0.01568	0.00285	3.565e-08	264000
Carbohydrate	rs62252509	T	C	0.01572	0.00285	3.286e-08	264000
Carbohydrate	rs17456763	T	C	0.01571	0.00284	3.315e-08	264000
Carbohydrate	rs17516346	A	G	-0.0157	0.00284	3.319e-08	264000
Carbohydrate	rs67018424	A	G	0.01571	0.00285	3.351e-08	264000
Carbohydrate	rs17456820	A	T	0.01571	0.00284	3.285e-08	264000
Carbohydrate	rs10511076	A	G	-0.01566	0.00284	3.589e-08	264000
Carbohydrate	rs10511075	A	G	0.01567	0.00284	3.528e-08	264000
Carbohydrate	rs58919842	A	G	0.01571	0.00285	3.371e-08	264000
Carbohydrate	rs59491876	C	G	-0.01572	0.00285	3.338e-08	264000
Carbohydrate	rs59770976	A	G	-0.01568	0.00285	3.593e-08	264000
Carbohydrate	rs56779213	A	G	-0.01568	0.00285	3.595e-08	264000
Carbohydrate	rs17516470	C	G	-0.0156	0.00285	4.26e-08	264000
Carbohydrate	rs57756567	A	T	0.01567	0.00285	3.663e-08	264000
Carbohydrate	rs17516504	T	C	-0.0156	0.00285	4.256e-08	264000
Carbohydrate	rs62252512	A	T	-0.01559	0.00285	4.301e-08	264000
Carbohydrate	rs66625173	A	G	-0.01565	0.00285	3.809e-08	264000
Carbohydrate	rs17516580	C	G	0.01564	0.00285	3.903e-08	264000
Carbohydrate	rs17457050	T	C	0.01568	0.00285	3.59e-08	264000
Carbohydrate	rs67544605	A	T	-0.01568	0.00285	3.608e-08	264000
Carbohydrate	rs17516683	A	G	0.01561	0.00285	4.153e-08	264000
Carbohydrate	rs66781790	A	G	-0.01582	0.00284	2.666e-08	264000
Carbohydrate	rs17457189	A	G	0.01569	0.00285	3.533e-08	264000
Carbohydrate	rs17457217	A	T	-0.01567	0.00285	3.621e-08	264000
Carbohydrate	rs2167047	A	T	-0.01583	0.00285	2.64e-08	264000
Carbohydrate	rs2122235	T	C	0.01565	0.00285	3.794e-08	264000
Carbohydrate	rs62252513	T	C	0.01565	0.00285	3.803e-08	264000
Carbohydrate	rs17516857	A	C	-0.01566	0.00285	3.709e-08	264000
Carbohydrate	rs35438712	T	C	-0.01588	0.00284	2.372e-08	264000
Carbohydrate	rs17457377	T	G	-0.01566	0.00285	3.732e-08	264000
Carbohydrate	rs62252516	T	C	0.01556	0.00285	4.556e-08	264000
Carbohydrate	rs17457426	A	C	-0.0156	0.00285	4.251e-08	264000
Carbohydrate	rs17457454	T	C	-0.0156	0.00285	4.244e-08	264000
Carbohydrate	rs62252518	A	T	-0.01566	0.00285	3.722e-08	264000
Carbohydrate	rs62252519	A	T	0.01566	0.00285	3.745e-08	264000
Carbohydrate	rs6766493	A	G	0.01563	0.00285	3.94e-08	264000
Carbohydrate	rs6779501	T	C	-0.01563	0.00285	3.946e-08	264000
Carbohydrate	rs4856271	A	G	-0.01562	0.00284	3.949e-08	264000
Carbohydrate	rs61586601	A	T	-0.01556	0.00285	4.537e-08	264000
Carbohydrate	rs17517080	C	G	-0.0156	0.00285	4.171e-08	264000
Carbohydrate	rs17517121	A	G	0.0156	0.00284	4.147e-08	264000
Carbohydrate	rs17517142	A	C	-0.01564	0.00285	3.878e-08	264000
Carbohydrate	rs17457642	T	C	0.01557	0.00285	4.48e-08	264000
Carbohydrate	rs17457669	T	C	-0.01557	0.00285	4.481e-08	264000
Carbohydrate	rs17517238	C	G	0.01564	0.00285	3.878e-08	264000
Carbohydrate	rs66922686	A	T	-0.01564	0.00285	3.873e-08	264000
Carbohydrate	rs7620313	T	C	0.01555	0.00284	4.524e-08	264000
Carbohydrate	rs1900918	A	C	0.01566	0.00284	3.673e-08	264000
Carbohydrate	rs6790090	A	T	0.01563	0.00284	3.887e-08	264000
Carbohydrate	rs6777456	T	G	0.01565	0.00285	3.808e-08	264000
Carbohydrate	rs6777458	A	G	0.01557	0.00285	4.453e-08	264000
Carbohydrate	rs17517273	A	C	-0.01559	0.00285	4.34e-08	264000
Carbohydrate	rs6780346	T	C	0.01571	0.00284	3.167e-08	264000
Carbohydrate	rs6804626	A	G	-0.01552	0.00284	4.79e-08	264000
Carbohydrate	rs11127899	A	G	-0.01556	0.00285	4.551e-08	264000
Carbohydrate	rs11127900	A	G	-0.01556	0.00285	4.616e-08	264000
Carbohydrate	rs10865610	A	G	-0.01556	0.00284	4.472e-08	264000
Carbohydrate	rs1551045	A	C	-0.01564	0.00285	3.937e-08	264000
Carbohydrate	rs1463203	A	T	-0.01557	0.00285	4.462e-08	264000
Carbohydrate	rs1463204	T	C	-0.01561	0.00285	4.118e-08	264000
Carbohydrate	rs1551046	C	G	0.01561	0.00285	4.182e-08	264000
Carbohydrate	rs1551047	T	G	0.01569	0.00285	3.551e-08	264000
Carbohydrate	rs1551048	T	G	0.01568	0.00285	3.579e-08	264000
Carbohydrate	rs6765881	A	G	-0.01565	0.00285	3.862e-08	264000
Carbohydrate	rs6765991	A	G	-0.01564	0.00285	3.937e-08	264000
Carbohydrate	rs1463205	A	G	0.01566	0.00284	3.664e-08	264000
Carbohydrate	rs4502590	T	C	0.01561	0.00284	4.042e-08	264000
Carbohydrate	rs1463206	A	T	0.01566	0.00284	3.599e-08	264000
Carbohydrate	rs1463207	T	C	0.01572	0.00285	3.349e-08	264000
Carbohydrate	rs4603966	T	C	-0.01568	0.00285	3.562e-08	264000
Carbohydrate	rs62253964	T	C	0.01569	0.00285	3.535e-08	264000
Carbohydrate	rs62253965	A	G	0.01569	0.00285	3.533e-08	264000
Carbohydrate	rs4856585	A	T	0.01565	0.00285	3.843e-08	264000
Carbohydrate	rs4856273	A	G	0.01565	0.00285	3.848e-08	264000
Carbohydrate	rs6792295	T	C	-0.01562	0.00285	4.05e-08	264000
Carbohydrate	rs6549033	A	T	-0.01569	0.00285	3.55e-08	264000
Carbohydrate	rs62253966	A	G	0.01564	0.00285	3.918e-08	264000
Carbohydrate	rs17458504	A	G	0.01558	0.00284	4.338e-08	264000
Carbohydrate	rs62253969	A	G	0.01567	0.00285	3.62e-08	264000
Carbohydrate	rs17518082	T	C	0.01571	0.00285	3.354e-08	264000
Carbohydrate	rs17458574	T	G	-0.01566	0.00285	3.713e-08	264000
Carbohydrate	rs6783137	T	C	0.01578	0.00285	2.941e-08	264000
Carbohydrate	rs6783138	C	G	-0.01579	0.00285	2.893e-08	264000
Carbohydrate	rs17458609	T	C	0.01564	0.00285	3.908e-08	264000
Carbohydrate	rs1449405	T	C	-0.01563	0.00284	3.878e-08	264000
Carbohydrate	rs1449406	A	C	-0.0157	0.00285	3.489e-08	264000
Carbohydrate	rs1449407	A	G	-0.01564	0.00285	3.913e-08	264000
Carbohydrate	rs6549036	T	G	0.01563	0.00284	3.846e-08	264000
Carbohydrate	rs6549037	A	G	0.01566	0.00285	3.741e-08	264000
Carbohydrate	rs62253970	C	G	0.01563	0.00285	3.998e-08	264000
Carbohydrate	rs62253971	A	G	-0.0156	0.00285	4.23e-08	264000
Carbohydrate	rs1449408	C	G	0.01563	0.00285	3.963e-08	264000
Carbohydrate	rs2029132	A	C	0.01555	0.00284	4.536e-08	264000
Carbohydrate	rs2029133	A	G	0.01572	0.00285	3.337e-08	264000
Carbohydrate	rs1449410	C	G	-0.01558	0.00285	4.42e-08	264000
Carbohydrate	rs62250463	T	G	-0.01557	0.00285	4.512e-08	264000
Carbohydrate	rs1375544	A	G	-0.01557	0.00285	4.483e-08	264000
Carbohydrate	rs1375546	A	G	0.01556	0.00285	4.592e-08	264000
Carbohydrate	rs72615726	A	G	0.01561	0.00285	4.081e-08	264000
Carbohydrate	rs17518584	T	C	0.0156	0.00284	4.177e-08	264000
Carbohydrate	rs66631011	A	G	0.01553	0.00285	4.8e-08	264000
Carbohydrate	rs68049270	T	C	0.01552	0.00285	4.943e-08	264000
Carbohydrate	rs73133799	T	C	-0.01564	0.00285	3.839e-08	264000
Carbohydrate	rs73133800	T	C	0.01559	0.00285	4.342e-08	264000
Carbohydrate	rs67568006	T	G	0.01561	0.00285	4.136e-08	264000
Carbohydrate	rs62250465	T	C	0.01552	0.00285	4.965e-08	264000
Carbohydrate	rs6549039	A	G	-0.01556	0.00284	4.416e-08	264000
Carbohydrate	rs4856277	A	G	-0.01557	0.00285	4.483e-08	264000
Carbohydrate	rs68028504	A	G	-0.01557	0.00285	4.49e-08	264000
Carbohydrate	rs4441668	A	G	-0.01554	0.00284	4.584e-08	264000
Carbohydrate	rs66544515	A	G	0.01553	0.00285	4.796e-08	264000
Carbohydrate	rs1449372	T	G	-0.0155	0.00284	4.999e-08	264000
Carbohydrate	rs1449375	T	G	0.01552	0.00285	4.937e-08	264000
Carbohydrate	rs2122234	A	G	0.01552	0.00285	4.935e-08	264000
Carbohydrate	rs1449381	A	G	-0.01553	0.00285	4.784e-08	264000
Carbohydrate	rs17459906	T	C	-0.01553	0.00285	4.809e-08	264000
Carbohydrate	rs1900915	C	G	0.01553	0.00285	4.787e-08	264000
Carbohydrate	rs1375551	T	C	-0.01551	0.00284	4.911e-08	264000
Carbohydrate	rs1449384	A	T	0.01554	0.00285	4.773e-08	264000
Carbohydrate	rs1449385	T	C	-0.01554	0.00285	4.741e-08	264000
Carbohydrate	rs62250489	A	C	0.01556	0.00285	4.556e-08	264000
Carbohydrate	rs62250490	T	C	0.01556	0.00285	4.559e-08	264000
Carbohydrate	rs7617306	T	C	0.01558	0.00285	4.321e-08	264000
Carbohydrate	rs17519948	A	C	-0.01551	0.00285	4.974e-08	264000
Carbohydrate	rs17460541	T	G	0.01552	0.00284	4.887e-08	264000
Carbohydrate	rs1375555	T	C	-0.01557	0.00284	4.297e-08	264000
Carbohydrate	rs1375554	A	G	-0.01553	0.00284	4.743e-08	264000
Carbohydrate	rs61316596	T	C	0.01555	0.00285	4.66e-08	264000
Carbohydrate	rs59417256	T	G	-0.01555	0.00285	4.634e-08	264000
Carbohydrate	rs57276248	A	G	-0.01555	0.00285	4.625e-08	264000
Carbohydrate	rs7616458	T	C	-0.01551	0.00284	4.874e-08	264000
Carbohydrate	rs58889493	A	T	0.01561	0.00285	4.166e-08	264000
Carbohydrate	rs17460701	T	C	0.01553	0.00284	4.745e-08	264000
Carbohydrate	rs6790699	A	G	-0.01551	0.00284	4.882e-08	264000
Carbohydrate	rs6766690	T	C	0.01555	0.00284	4.473e-08	264000
Carbohydrate	rs7617356	T	C	0.01552	0.00284	4.79e-08	264000
Carbohydrate	rs62250500	T	C	0.01553	0.00285	4.807e-08	264000
Carbohydrate	rs6762535	A	G	0.01552	0.00284	4.772e-08	264000
Carbohydrate	rs6762733	A	G	0.01552	0.00284	4.747e-08	264000
Carbohydrate	rs6549041	C	G	-0.01552	0.00284	4.73e-08	264000
Carbohydrate	rs6549042	A	G	-0.01553	0.00285	4.876e-08	264000
Carbohydrate	rs6549043	A	T	-0.01555	0.00284	4.511e-08	264000
Carbohydrate	rs6549044	A	G	-0.01553	0.00285	4.752e-08	264000
Carbohydrate	rs62250503	A	T	0.01554	0.00285	4.71e-08	264000
Carbohydrate	rs1375557	T	G	0.01552	0.00284	4.774e-08	264000
Carbohydrate	rs7634761	A	G	0.01557	0.00284	4.357e-08	264000
Carbohydrate	rs4508796	A	G	-0.01561	0.00285	4.167e-08	264000
Carbohydrate	rs2029130	A	T	0.01555	0.00284	4.53e-08	264000
Carbohydrate	rs7012637	A	G	0.01734	0.00278	4.684e-10	259000
Carbohydrate	rs7012814	A	G	0.01728	0.00278	5.454e-10	259000
Carbohydrate	rs9987289	A	G	-0.02623	0.0048	4.639e-08	264000
Carbohydrate	rs954664	A	T	0.01515	0.00275	3.71e-08	264000
Carbohydrate	rs10962121	T	G	-0.01519	0.00275	3.395e-08	264000
Carbohydrate	rs10732335	A	C	-0.01883	0.00344	4.433e-08	171000
Fat	rs8047587	T	G	0.01591	0.00277	9.303e-09	264000
Fat	rs9937053	A	G	0.01828	0.00278	5.074e-11	264000
Fat	rs9937354	A	G	0.01831	0.00278	4.645e-11	264000
Fat	rs9928094	A	G	-0.01831	0.00278	4.677e-11	264000
Fat	rs9930333	T	G	-0.02185	0.00316	4.984e-12	205000
Fat	rs9930397	A	T	0.01828	0.00278	4.93e-11	264000
Fat	rs9940278	T	C	0.01826	0.00278	5.153e-11	264000
Fat	rs9939973	A	G	0.01826	0.00278	5.3e-11	264000
Fat	rs9940646	C	G	-0.01822	0.00278	5.854e-11	264000
Fat	rs9940128	A	G	0.01834	0.00278	4.326e-11	264000
Fat	rs1421085	T	C	-0.01916	0.0028	8.249e-12	264000
Fat	rs1421086	A	C	0.01827	0.00278	5.126e-11	264000
Fat	rs9923147	T	C	0.0183	0.00278	4.824e-11	264000
Fat	rs9923544	T	C	0.0183	0.00278	4.776e-11	264000
Fat	rs11642015	T	C	0.01918	0.0028	7.259e-12	264000
Fat	rs1558901	A	T	-0.01834	0.00278	4.313e-11	264000
Fat	rs62048402	A	G	0.01918	0.0028	7.407e-12	264000
Fat	rs1558902	A	T	0.01914	0.0028	8.572e-12	264000
Fat	rs11075985	A	C	0.0184	0.00278	3.769e-11	264000
Fat	rs56094641	A	G	-0.01917	0.0028	7.501e-12	264000
Fat	rs55872725	T	C	0.01919	0.0028	7.214e-12	264000
Fat	rs1121980	A	G	0.0183	0.00278	4.872e-11	264000
Fat	rs7187250	A	C	0.01889	0.00281	1.801e-11	264000
Fat	rs7193144	T	C	-0.01889	0.00281	1.86e-11	264000
Fat	rs62033399	T	C	0.019	0.00281	1.402e-11	264000
Fat	rs62033400	A	G	-0.01917	0.00281	9.288e-12	264000
Fat	rs8063057	T	C	-0.01893	0.00281	1.598e-11	264000
Fat	rs17817449	T	G	-0.01868	0.00281	3.084e-11	264000
Fat	rs8043757	A	T	-0.01886	0.00281	2.014e-11	264000
Fat	rs9972653	T	G	0.01887	0.00281	1.801e-11	264000
Fat	rs17817497	T	C	-0.01909	0.00281	1.132e-11	264000
Fat	rs8050136	A	C	0.01882	0.00281	2.213e-11	264000
Fat	rs8051591	A	G	-0.01895	0.00281	1.634e-11	264000
Fat	rs9935401	A	G	0.01888	0.00281	1.912e-11	264000
Fat	rs9933509	T	C	-0.01819	0.00279	7.124e-11	264000
Fat	rs3751812	T	G	0.01903	0.00281	1.354e-11	264000
Fat	rs3751813	T	G	0.01721	0.00276	4.689e-10	264000
Fat	rs3751814	A	G	0.01893	0.00281	1.627e-11	264000
Fat	rs9931900	A	G	-0.01823	0.00279	6.417e-11	264000
Fat	rs56313538	A	G	-0.01895	0.00281	1.587e-11	264000
Fat	rs9936385	T	C	-0.01895	0.00281	1.652e-11	264000
Fat	rs9923233	C	G	0.01905	0.00281	1.257e-11	264000
Fat	rs9923312	A	G	0.01894	0.00281	1.594e-11	264000
Fat	rs11075988	A	G	0.01895	0.00281	1.577e-11	264000
Fat	rs11075989	T	C	0.01897	0.00281	1.554e-11	264000
Fat	rs11075990	A	G	-0.01897	0.00281	1.545e-11	264000
Fat	rs11075991	A	T	-0.01894	0.00281	1.603e-11	264000
Fat	rs11075992	T	C	-0.01896	0.00281	1.508e-11	264000
Fat	rs9926289	A	G	0.01894	0.00281	1.618e-11	264000
Fat	rs9939609	A	T	0.01896	0.00281	1.549e-11	264000
Fat	rs9937709	A	G	-0.01823	0.00279	6.383e-11	264000
Fat	rs9927317	C	G	-0.0242	0.0035	4.767e-12	171000
Fat	rs17817712	A	G	-0.01907	0.00281	1.19e-11	264000
Fat	rs7206410	T	C	-0.019	0.00281	1.388e-11	264000
Fat	rs7206629	T	C	-0.01827	0.00279	5.949e-11	264000
Fat	rs7202116	A	G	-0.01901	0.00281	1.395e-11	264000
Fat	rs7202296	A	G	-0.01901	0.00281	1.359e-11	264000
Fat	rs7201850	T	C	0.01841	0.00279	4.202e-11	264000
Fat	rs66908032	A	C	0.01898	0.00281	1.476e-11	264000
Fat	rs72803697	T	C	0.01901	0.00281	1.363e-11	264000
Fat	rs62033403	A	G	-0.01897	0.00281	1.512e-11	264000
Fat	rs62033404	A	G	-0.01897	0.00281	1.504e-11	264000
Fat	rs62033405	T	C	0.01916	0.00281	9.628e-12	264000
Fat	rs7206122	A	G	0.01901	0.00281	1.324e-11	264000
Fat	rs7190396	T	G	-0.01906	0.00281	1.22e-11	264000
Fat	rs7185735	A	G	-0.01909	0.00281	1.125e-11	264000
Fat	rs79994966	T	C	-0.01913	0.00281	1.057e-11	264000
Fat	rs11646715	A	G	0.01789	0.00276	8.455e-11	264000
Fat	rs62033406	A	G	-0.01805	0.00279	1.028e-10	264000
Fat	rs9941349	T	C	0.01868	0.00279	2.231e-11	264000
Fat	rs28567725	T	C	-0.01871	0.00279	2.08e-11	264000
Fat	rs9931494	C	G	-0.01866	0.00279	2.328e-11	264000
Fat	rs10468280	A	G	-0.01929	0.00281	7.023e-12	264000
Fat	rs62033408	A	G	-0.01921	0.00281	8.551e-12	264000
Fat	rs17817964	T	C	0.01913	0.00281	1.071e-11	264000
Fat	rs62033413	C	G	-0.01675	0.00279	2.005e-09	264000
Fat	rs9930501	A	G	-0.0166	0.00278	2.193e-09	264000
Fat	rs9930506	A	G	-0.01666	0.00278	1.942e-09	264000
Fat	rs9932754	T	C	-0.01664	0.00277	2.037e-09	264000
Fat	rs9933040	A	T	0.01662	0.00278	2.109e-09	264000
Fat	rs9922708	T	C	0.01679	0.00278	1.428e-09	264000
Fat	rs72805611	T	C	0.01682	0.00279	1.731e-09	264000
Fat	rs9922619	T	G	0.01661	0.00278	2.161e-09	264000
Fat	rs7188250	T	C	-0.01598	0.00279	1.066e-08	264000
Fat	rs72805612	A	G	0.01663	0.0028	2.706e-09	264000
Fat	rs11075993	T	G	0.01681	0.00279	1.766e-09	264000
Fat	rs72805613	A	G	-0.01664	0.00279	2.582e-09	264000
Fat	rs12149574	C	G	-0.01666	0.00279	2.456e-09	264000
Fat	rs12149832	A	G	0.017	0.00279	1.169e-09	264000
Fat	rs11649091	T	G	-0.01604	0.00278	7.727e-09	264000
Fat	rs6857	T	C	-0.02095	0.00379	3.19e-08	253000
Fat	rs429358	T	C	0.02379	0.00388	8.651e-10	258000
Fat	rs12721051	C	G	0.02056	0.00367	2.069e-08	245000
Fat	rs56131196	A	G	-0.02059	0.00366	1.901e-08	245000
Fat	rs4420638	A	G	0.02135	0.00372	9.922e-09	239000
Fat	rs411482	T	C	-0.0182	0.00291	4.148e-10	244000
Fat	rs1236093	T	C	-0.0181	0.00291	5.184e-10	244000
Fat	rs454715	T	G	-0.01929	0.00291	3.441e-11	244000
Fat	rs2617801	C	G	-0.01908	0.00291	5.495e-11	244000
Fat	rs368654	A	G	-0.02441	0.00315	8.818e-15	236000
Fat	rs374886	A	G	-0.01925	0.00292	4.006e-11	244000
Fat	rs281391	T	C	0.02149	0.0035	7.963e-10	239000
Fat	rs281392	A	G	0.01926	0.00305	2.829e-10	239000
Fat	rs371690	A	G	-0.01877	0.00307	9.518e-10	239000
Fat	rs373002	T	C	0.0175	0.00302	6.675e-09	239000
Fat	rs448198	T	C	-0.01834	0.00306	1.948e-09	239000
Fat	rs8111874	A	G	-0.02376	0.00295	8.648e-16	231000
Fat	rs67824186	A	G	-0.0183	0.00303	1.582e-09	239000
Fat	rs12462111	T	C	-0.0238	0.00295	7.682e-16	231000
Fat	rs3826846	A	G	-0.02004	0.00306	5.505e-11	236000
Fat	rs2098709	A	G	-0.01944	0.00305	1.819e-10	231000
Fat	rs368565	T	C	0.02188	0.00291	5.727e-14	239000
Fat	rs35106244	T	C	-0.02859	0.00296	3.947e-22	231000
Fat	rs679574	C	G	0.02665	0.00278	9.914e-22	258000
Fat	rs516316	C	G	-0.02677	0.00278	6.725e-22	258000
Fat	rs516246	T	C	-0.02666	0.00278	9.658e-22	258000
Fat	rs492602	A	G	0.0266	0.00278	1.172e-21	258000
Fat	rs681343	T	C	-0.02654	0.00278	1.437e-21	258000
Fat	rs281377	T	C	0.02317	0.0028	1.39e-16	258000
Fat	rs601338	A	G	-0.02665	0.00278	1.01e-21	258000
Fat	rs602662	A	G	-0.02705	0.00279	2.716e-22	258000
Fat	rs485186	A	G	0.02734	0.00279	9.657e-23	258000
Fat	rs485073	A	G	0.02756	0.00279	4.334e-23	258000
Fat	rs603985	T	C	0.02759	0.00279	3.971e-23	258000
Fat	rs571689	T	C	-0.02743	0.00278	6.717e-23	258000
Fat	rs570794	T	C	0.02744	0.00278	6.398e-23	258000
Fat	rs569970	T	C	0.02925	0.00299	1.189e-22	225000
Fat	rs2251034	A	G	-0.02753	0.00278	4.674e-23	258000
Fat	rs507855	A	G	0.02717	0.00278	1.713e-22	258000
Fat	rs507766	T	C	0.02729	0.00279	1.169e-22	258000
Fat	rs507711	T	C	-0.02736	0.00278	8.737e-23	258000
Fat	rs506897	C	G	-0.02742	0.00278	7.008e-23	258000
Fat	rs504963	A	G	-0.02744	0.00279	6.744e-23	258000
Fat	rs632111	A	G	0.02743	0.00279	6.967e-23	258000
Fat	rs503279	T	C	0.02745	0.00279	6.397e-23	258000
Fat	rs633372	A	G	-0.02741	0.00279	7.537e-23	258000
Fat	rs2548459	T	C	0.02739	0.00278	7.856e-23	258000
Fat	rs692854	A	C	-0.02734	0.00278	9.199e-23	258000
Fat	rs1704773	A	G	0.02744	0.00278	6.548e-23	258000
Fat	rs646327	A	G	0.02853	0.00278	1.226e-24	258000
Fat	rs2638281	A	G	0.02337	0.00282	1.295e-16	258000
Fat	rs676388	T	C	0.0279	0.00279	1.278e-23	258000
Fat	rs584768	A	G	-0.02804	0.00278	7.466e-24	258000
Fat	rs2452170	A	G	-0.028	0.00278	8.611e-24	258000
Fat	rs2638282	A	G	-0.02801	0.00278	8.444e-24	258000
Fat	rs281378	A	G	0.01985	0.00292	1.028e-11	258000
Fat	rs281379	A	G	-0.02834	0.00278	2.438e-24	258000
Fat	rs281380	T	C	-0.02011	0.00289	3.196e-12	258000
Fat	rs281381	T	C	-0.02139	0.00293	3.091e-13	258000
Fat	rs4002471	T	C	-0.02916	0.00279	1.47e-25	258000
Fat	rs204248	C	G	0.02133	0.00293	3.671e-13	258000
Fat	rs281386	A	G	-0.02141	0.00293	2.852e-13	258000
Fat	rs35866622	T	C	-0.02869	0.00279	7.384e-25	258000
Fat	rs33988101	T	G	-0.0294	0.00276	1.664e-26	264000
Fat	rs12978750	A	G	0.02936	0.00276	1.988e-26	264000
Fat	rs12978752	A	C	0.02936	0.00276	1.935e-26	264000
Fat	rs12979278	T	C	-0.02903	0.00276	6.667e-26	264000
Fat	rs660745	T	C	0.02874	0.00276	2.027e-25	264000
Fat	rs11672900	A	G	0.02909	0.00276	5.292e-26	264000
Fat	rs281395	C	G	-0.0211	0.00291	4.137e-13	261000
Fat	rs281394	C	G	-0.0219	0.00289	3.591e-14	264000
Fat	rs546308	A	G	-0.02469	0.0028	1.116e-18	264000
Fat	rs629504	C	G	0.02467	0.0028	1.234e-18	264000
Fat	rs3859439	T	C	0.02465	0.0028	1.259e-18	264000
Fat	rs281393	T	C	0.02203	0.0029	2.766e-14	264000
Fat	rs519757	A	C	0.02451	0.0028	1.968e-18	264000
Fat	rs11882796	A	T	0.02878	0.00276	1.595e-25	264000
Fat	rs11666792	A	G	-0.02917	0.00275	3.347e-26	264000
Fat	rs12979891	T	C	-0.0292	0.00275	2.921e-26	264000
Fat	rs11878908	T	C	-0.02912	0.00275	4.104e-26	264000
Fat	rs2287921	T	C	0.02916	0.00276	3.513e-26	264000
Fat	rs479486	A	G	-0.02854	0.00276	4.389e-25	264000
Fat	rs8112983	T	C	0.02911	0.00275	4.211e-26	264000
Fat	rs2287922	A	G	-0.02901	0.00275	5.93e-26	264000
Fat	rs281407	A	G	0.01975	0.00303	7.502e-11	250000
Fat	rs281408	A	C	0.02465	0.00279	9.047e-19	264000
Fat	rs412712	A	T	-0.02467	0.00279	8.061e-19	264000
Fat	rs439523	T	C	0.02843	0.00275	5.378e-25	264000
Fat	rs12979144	A	G	0.02502	0.00279	2.65e-19	264000
Fat	rs12978499	A	C	-0.02505	0.00279	2.434e-19	264000
Fat	rs418464	T	C	0.02896	0.00275	6.958e-26	264000
Fat	rs452270	T	C	0.02933	0.00299	9.986e-23	224000
Fat	rs1231281	A	G	-0.02893	0.00275	7.865e-26	264000
Fat	rs12981072	C	G	-0.02427	0.00277	2.069e-18	264000
Fat	rs380743	A	G	-0.02902	0.00279	2.408e-25	257000
Fat	rs427248	T	C	-0.029	0.00279	2.552e-25	257000
Fat	rs56066508	T	C	0.02454	0.00277	9.09e-19	264000
Fat	rs973579	A	G	0.02858	0.00275	2.911e-25	264000
Fat	rs2307018	A	C	0.02411	0.00278	4.052e-18	264000
Fat	rs2307019	A	G	0.02392	0.00278	7.179e-18	264000
Fat	rs838147	A	G	-0.02892	0.00275	7.78e-26	264000
Fat	rs12462324	A	G	-0.02449	0.00278	1.099e-18	264000
Fat	rs12460295	T	G	-0.0245	0.00278	1.068e-18	264000
Fat	rs11672046	T	C	0.02462	0.00278	7.312e-19	264000
Fat	rs8108136	T	C	0.02458	0.00278	8.593e-19	264000
Fat	rs8108468	A	G	0.02457	0.00278	8.846e-19	264000
Fat	rs8111288	A	G	0.02456	0.00278	8.855e-19	264000
Fat	rs8111399	T	G	0.02453	0.00278	9.657e-19	264000
Fat	rs8111208	A	C	-0.02451	0.00278	1.047e-18	264000
Fat	rs11083948	A	G	-0.02451	0.00278	1.024e-18	264000
Fat	rs12611201	A	G	0.02456	0.00278	9.106e-19	264000
Fat	rs12611203	A	G	0.02463	0.00278	7.374e-19	264000
Fat	rs12611211	A	G	0.0246	0.00278	8.028e-19	264000
Fat	rs12982115	A	G	-0.02454	0.00278	9.696e-19	264000
Fat	rs838145	A	G	0.02936	0.0028	1.079e-25	257000
Fat	rs12975033	A	T	-0.0243	0.00278	2.131e-18	264000
Fat	rs12975781	T	C	0.02246	0.00286	3.812e-15	256000
Fat	rs8102032	T	C	0.02439	0.00278	1.535e-18	264000
Fat	rs8104897	A	C	0.02448	0.00278	1.19e-18	264000
Fat	rs8105137	A	G	0.02448	0.00278	1.215e-18	264000
Fat	rs8106205	T	C	-0.02547	0.00277	3.453e-20	264000
Fat	rs838144	T	C	0.02898	0.00275	6.397e-26	264000
Fat	rs11667321	A	G	-0.02539	0.00277	4.384e-20	264000
Fat	rs28400015	A	G	0.02446	0.00278	1.231e-18	264000
Fat	rs28400014	C	G	-0.02512	0.00277	1.08e-19	264000
Fat	rs838142	A	G	-0.02154	0.00313	5.809e-12	252000
Fat	rs838140	T	C	0.02248	0.00321	2.552e-12	252000
Fat	rs4021	A	G	-0.02121	0.00313	1.232e-11	252000
Fat	rs4015	T	C	0.02026	0.00353	9.666e-09	252000
Fat	rs838137	A	T	0.01867	0.0031	1.723e-09	231000
Fat	rs8103840	T	C	0.0286	0.00283	4.493e-24	251000
Fat	rs838136	T	C	-0.02195	0.00317	4.283e-12	244000
Fat	rs28745907	T	G	-0.02056	0.0036	1.179e-08	251000
Fat	rs838134	A	C	-0.02344	0.00323	4.285e-13	236000
Fat	rs838133	A	G	-0.0293	0.00301	2.381e-22	223000
Fat	rs739320	T	C	-0.02575	0.0034	3.919e-14	181000
Fat	rs2081194	C	G	0.02323	0.0034	7.735e-12	181000
Fat	rs9749209	A	G	-0.02076	0.00346	2.074e-09	181000
Fat	rs499765	C	G	-0.02389	0.00317	5.176e-14	222000
Fat	rs637174	A	G	0.02321	0.00317	2.602e-13	222000
Fat	rs837629	C	G	-0.02286	0.00316	5.116e-13	222000
Fat	rs669789	T	C	-0.02268	0.00316	7.404e-13	222000
Fat	rs28567372	T	G	-0.02092	0.00314	2.644e-11	222000
Fat	rs504215	T	G	0.0199	0.00315	2.766e-10	222000
Fat	rs604740	T	C	-0.02048	0.00314	6.386e-11	222000
Fat	rs633236	T	C	0.02056	0.00314	5.643e-11	222000
Fat	rs4802503	A	G	-0.01851	0.00302	9.194e-10	222000
Fat	rs114026228	T	C	-0.12648	0.01919	4.425e-11	171000
Fat	rs144198753	T	C	0.12058	0.01581	2.365e-14	186000
Fat	rs145441283	A	G	-0.12571	0.01679	7.121e-14	181000
Fat	rs146788033	A	G	-0.07268	0.01222	2.713e-09	198000
Fat	rs1229984	T	C	0.09777	0.00886	2.64e-28	224000
Fat	rs145452708	C	G	0.11169	0.0135	1.299e-16	224000
Fat	rs138495951	A	G	0.11032	0.0135	3.043e-16	224000
Fat	rs141973904	T	C	0.11149	0.0135	1.465e-16	224000
Fat	rs188726265	T	C	0.12476	0.01666	6.881e-14	209000
Fat	rs543669349	T	G	-0.15148	0.01887	1.007e-15	184000
Fat	rs147825380	A	C	-0.13274	0.01742	2.491e-14	198000
Fat	rs148960385	A	G	0.13438	0.01762	2.448e-14	198000
Fat	rs150848708	A	G	0.13455	0.01773	3.225e-14	198000
Fat	rs140280172	A	C	0.14228	0.0216	4.446e-11	183000
Fat	rs150208378	T	C	0.14253	0.02142	2.836e-11	183000
Fat	rs148382129	T	C	0.13473	0.02107	1.617e-10	183000
Fat	rs150021439	T	C	0.13894	0.02178	1.783e-10	183000
Fat	rs182789399	T	C	0.16231	0.02527	1.339e-10	171000
Fat	rs149580409	T	C	-0.16673	0.02527	4.181e-11	171000
Fat	rs34256344	C	G	0.01546	0.0028	3.54e-08	258000
Fat	rs57193069	A	G	-0.01574	0.0028	1.801e-08	258000
Fat	rs34373690	A	T	0.0152	0.00277	3.929e-08	264000
Fat	rs7012637	A	G	-0.01877	0.00278	1.566e-11	259000
Fat	rs7012814	A	G	-0.0189	0.00278	1.122e-11	259000
Fat	rs983310	C	G	0.01799	0.00322	2.235e-08	264000
Fat	rs7002551	T	C	-0.01795	0.00321	2.194e-08	264000
Fat	rs7464067	C	G	0.0175	0.0032	4.713e-08	264000
Protein	rs7206790	C	G	-0.01538	0.0028	4.078e-08	256000
Protein	rs8047587	T	G	0.01576	0.00277	1.299e-08	264000
Protein	rs9937053	A	G	0.01522	0.00278	4.482e-08	264000
Protein	rs9937354	A	G	0.0152	0.00278	4.618e-08	264000
Protein	rs9928094	A	G	-0.0152	0.00278	4.699e-08	264000
Protein	rs9930397	A	T	0.01538	0.00278	3.234e-08	264000
Protein	rs9940278	T	C	0.01542	0.00278	2.988e-08	264000
Protein	rs9939973	A	G	0.01529	0.00278	3.945e-08	264000
Protein	rs9940646	C	G	-0.01541	0.00278	3.05e-08	264000
Protein	rs9940128	A	G	0.01531	0.00278	3.724e-08	264000
Protein	rs1421085	T	C	-0.01774	0.0028	2.455e-10	264000
Protein	rs1421086	A	C	0.01539	0.00278	3.173e-08	264000
Protein	rs9923147	T	C	0.01527	0.00278	4.073e-08	264000
Protein	rs9923544	T	C	0.01525	0.00278	4.194e-08	264000
Protein	rs11642015	T	C	0.01768	0.0028	2.732e-10	264000
Protein	rs1558901	A	T	-0.01533	0.00278	3.596e-08	264000
Protein	rs62048402	A	G	0.01767	0.0028	2.779e-10	264000
Protein	rs1558902	A	T	0.0176	0.0028	3.382e-10	264000
Protein	rs56094641	A	G	-0.01747	0.0028	4.315e-10	264000
Protein	rs55872725	T	C	0.01779	0.0028	2.092e-10	264000
Protein	rs1121980	A	G	0.01548	0.00278	2.644e-08	264000
Protein	rs7187250	A	C	0.0172	0.00281	9.526e-10	264000
Protein	rs7193144	T	C	-0.01722	0.00281	9.152e-10	264000
Protein	rs62033399	T	C	0.01717	0.00281	1.023e-09	264000
Protein	rs62033400	A	G	-0.01696	0.00281	1.606e-09	264000
Protein	rs8063057	T	C	-0.01692	0.00281	1.748e-09	264000
Protein	rs17817449	T	G	-0.01713	0.00281	1.127e-09	264000
Protein	rs8043757	A	T	-0.01708	0.00281	1.249e-09	264000
Protein	rs9972653	T	G	0.0172	0.00281	9.156e-10	264000
Protein	rs17817497	T	C	-0.01708	0.00281	1.272e-09	264000
Protein	rs8050136	A	C	0.01715	0.00281	1.071e-09	264000
Protein	rs8051591	A	G	-0.0172	0.00281	9.525e-10	264000
Protein	rs9935401	A	G	0.01709	0.00281	1.228e-09	264000
Protein	rs3751812	T	G	0.0172	0.00281	9.793e-10	264000
Protein	rs3751814	A	G	0.01717	0.00281	1.019e-09	264000
Protein	rs56313538	A	G	-0.01719	0.00281	9.602e-10	264000
Protein	rs9936385	T	C	-0.01715	0.00281	1.11e-09	264000
Protein	rs9923233	C	G	0.01723	0.00281	8.97e-10	264000
Protein	rs9923312	A	G	0.01719	0.00281	9.689e-10	264000
Protein	rs11075988	A	G	0.01719	0.00281	9.757e-10	264000
Protein	rs11075989	T	C	0.01722	0.00281	9.169e-10	264000
Protein	rs11075990	A	G	-0.01722	0.00281	9.109e-10	264000
Protein	rs11075991	A	T	-0.0172	0.00281	9.564e-10	264000
Protein	rs11075992	T	C	-0.01719	0.00281	9.594e-10	264000
Protein	rs9926289	A	G	0.01719	0.00281	9.719e-10	264000
Protein	rs9939609	A	T	0.01728	0.00281	8.064e-10	264000
Protein	rs17817712	A	G	-0.01723	0.00281	8.987e-10	264000
Protein	rs7206410	T	C	-0.0172	0.00281	9.5e-10	264000
Protein	rs7202116	A	G	-0.01724	0.00281	8.914e-10	264000
Protein	rs7202296	A	G	-0.01722	0.00281	9.16e-10	264000
Protein	rs66908032	A	C	0.0172	0.00281	9.601e-10	264000
Protein	rs72803697	T	C	0.01719	0.00281	9.706e-10	264000
Protein	rs62033403	A	G	-0.01718	0.00281	1.004e-09	264000
Protein	rs62033404	A	G	-0.01719	0.00281	9.869e-10	264000
Protein	rs62033405	T	C	0.01716	0.00281	1.051e-09	264000
Protein	rs7206122	A	G	0.01717	0.00281	1.007e-09	264000
Protein	rs7190396	T	G	-0.01721	0.00281	9.297e-10	264000
Protein	rs7185735	A	G	-0.01719	0.00281	9.849e-10	264000
Protein	rs79994966	T	C	-0.01713	0.00281	1.137e-09	264000
Protein	rs62033406	A	G	-0.01582	0.00279	1.502e-08	264000
Protein	rs10468280	A	G	-0.01703	0.00281	1.424e-09	264000
Protein	rs62033408	A	G	-0.01704	0.00281	1.395e-09	264000
Protein	rs17817964	T	C	0.01711	0.00281	1.196e-09	264000
Protein	rs62033413	C	G	-0.01691	0.00279	1.411e-09	264000
Protein	rs72805611	T	C	0.01693	0.00279	1.358e-09	264000
Protein	rs7188250	T	C	-0.01721	0.00279	7.289e-10	264000
Protein	rs72805612	A	G	0.01698	0.0028	1.242e-09	264000
Protein	rs11075993	T	G	0.01679	0.00279	1.856e-09	264000
Protein	rs72805613	A	G	-0.01692	0.00279	1.381e-09	264000
Protein	rs12149574	C	G	-0.01693	0.00279	1.372e-09	264000
Protein	rs12149832	A	G	0.01698	0.00279	1.208e-09	264000
Protein	rs11649091	T	G	-0.01693	0.00278	1.123e-09	264000
Protein	rs11642841	A	C	0.01671	0.00288	6.444e-09	251000
Protein	rs368565	T	C	0.01624	0.00291	2.427e-08	239000
Protein	rs679574	C	G	0.01978	0.00278	1.174e-12	258000
Protein	rs516316	C	G	-0.01985	0.00278	9.986e-13	258000
Protein	rs516246	T	C	-0.01975	0.00278	1.284e-12	258000
Protein	rs492602	A	G	0.01976	0.00278	1.225e-12	258000
Protein	rs681343	T	C	-0.01971	0.00278	1.399e-12	258000
Protein	rs281377	T	C	0.01912	0.0028	9.003e-12	258000
Protein	rs601338	A	G	-0.01983	0.00278	1.044e-12	258000
Protein	rs602662	A	G	-0.01994	0.00279	8.183e-13	258000
Protein	rs485186	A	G	0.01988	0.00279	9.67e-13	258000
Protein	rs485073	A	G	0.02022	0.00279	3.841e-13	258000
Protein	rs603985	T	C	0.02017	0.00279	4.377e-13	258000
Protein	rs571689	T	C	-0.0201	0.00278	5.154e-13	258000
Protein	rs570794	T	C	0.02011	0.00278	5.112e-13	258000
Protein	rs569970	T	C	0.01958	0.00299	5.564e-11	225000
Protein	rs2251034	A	G	-0.02016	0.00278	4.373e-13	258000
Protein	rs507855	A	G	0.02028	0.00278	3.282e-13	258000
Protein	rs507766	T	C	0.02017	0.00279	4.446e-13	258000
Protein	rs507711	T	C	-0.02017	0.00278	4.362e-13	258000
Protein	rs506897	C	G	-0.02025	0.00278	3.534e-13	258000
Protein	rs504963	A	G	-0.02045	0.00279	2.068e-13	258000
Protein	rs632111	A	G	0.02041	0.00278	2.345e-13	258000
Protein	rs503279	T	C	0.0202	0.00279	4.065e-13	258000
Protein	rs633372	A	G	-0.02044	0.00279	2.181e-13	258000
Protein	rs2548459	T	C	0.02028	0.00278	3.23e-13	258000
Protein	rs692854	A	C	-0.02075	0.00278	9.118e-14	258000
Protein	rs1704773	A	G	0.02066	0.00278	1.151e-13	258000
Protein	rs646327	A	G	0.02129	0.00278	2.096e-14	258000
Protein	rs2638281	A	G	0.01654	0.00282	4.803e-09	258000
Protein	rs676388	T	C	0.02274	0.00279	3.274e-16	258000
Protein	rs584768	A	G	-0.02249	0.00278	6.715e-16	258000
Protein	rs2452170	A	G	-0.02255	0.00278	5.64e-16	258000
Protein	rs2638282	A	G	-0.02243	0.00278	7.919e-16	258000
Protein	rs281378	A	G	0.01688	0.00292	7.268e-09	258000
Protein	rs281379	A	G	-0.02144	0.00278	1.346e-14	258000
Protein	rs281380	T	C	-0.01751	0.00289	1.293e-09	258000
Protein	rs281381	T	C	-0.02052	0.00293	2.692e-12	258000
Protein	rs4002471	T	C	-0.02569	0.00279	3.299e-20	258000
Protein	rs204248	C	G	0.02039	0.00293	3.698e-12	258000
Protein	rs281386	A	G	-0.02044	0.00293	3.181e-12	258000
Protein	rs35866622	T	C	-0.0242	0.00279	3.898e-18	258000
Protein	rs33988101	T	G	-0.0261	0.00276	3.036e-21	264000
Protein	rs12978750	A	G	0.02607	0.00276	3.408e-21	264000
Protein	rs12978752	A	C	0.02605	0.00276	3.59e-21	264000
Protein	rs12979278	T	C	-0.02584	0.00276	7.312e-21	264000
Protein	rs660745	T	C	0.02603	0.00276	3.869e-21	264000
Protein	rs11672900	A	G	0.02608	0.00276	3.132e-21	264000
Protein	rs281395	C	G	-0.02133	0.00291	2.336e-13	261000
Protein	rs281394	C	G	-0.02071	0.00289	7.918e-13	264000
Protein	rs546308	A	G	-0.02034	0.0028	3.631e-13	264000
Protein	rs629504	C	G	0.02027	0.0028	4.438e-13	264000
Protein	rs3859439	T	C	0.02013	0.0028	6.326e-13	264000
Protein	rs281393	T	C	0.02073	0.0029	8.162e-13	264000
Protein	rs519757	A	C	0.02013	0.0028	6.379e-13	264000
Protein	rs11882796	A	T	0.0263	0.00276	1.379e-21	264000
Protein	rs11666792	A	G	-0.02695	0.00275	1.326e-22	264000
Protein	rs12979891	T	C	-0.02696	0.00275	1.296e-22	264000
Protein	rs11878908	T	C	-0.02687	0.00275	1.756e-22	264000
Protein	rs2287921	T	C	0.02707	0.00276	8.766e-23	264000
Protein	rs479486	A	G	-0.02643	0.00276	9.83e-22	264000
Protein	rs8112983	T	C	0.02698	0.00275	1.169e-22	264000
Protein	rs2287922	A	G	-0.02698	0.00275	1.171e-22	264000
Protein	rs281407	A	G	0.02487	0.00303	2.398e-16	250000
Protein	rs281408	A	C	0.02758	0.00279	4.269e-23	264000
Protein	rs412712	A	T	-0.02757	0.00279	4.242e-23	264000
Protein	rs439523	T	C	0.02775	0.00275	6.846e-24	264000
Protein	rs12979144	A	G	0.02773	0.00279	2.363e-23	264000
Protein	rs12978499	A	C	-0.02774	0.00279	2.335e-23	264000
Protein	rs418464	T	C	0.02868	0.00275	2.06e-25	264000
Protein	rs452270	T	C	0.02802	0.00299	7.156e-21	224000
Protein	rs1231281	A	G	-0.02867	0.00275	2.123e-25	264000
Protein	rs12981072	C	G	-0.0278	0.00277	1.173e-23	264000
Protein	rs380743	A	G	-0.02847	0.00279	1.894e-24	257000
Protein	rs427248	T	C	-0.02849	0.00279	1.796e-24	257000
Protein	rs56066508	T	C	0.02763	0.00277	2.287e-23	264000
Protein	rs973579	A	G	0.02854	0.00275	3.428e-25	264000
Protein	rs2307018	A	C	0.02698	0.00278	2.645e-22	264000
Protein	rs2307019	A	G	0.02694	0.00278	3.066e-22	264000
Protein	rs838147	A	G	-0.02854	0.00275	3.497e-25	264000
Protein	rs12462324	A	G	-0.02685	0.00278	3.973e-22	264000
Protein	rs12460295	T	G	-0.02685	0.00278	4.055e-22	264000
Protein	rs11672046	T	C	0.02687	0.00278	3.762e-22	264000
Protein	rs8108136	T	C	0.02683	0.00278	4.424e-22	264000
Protein	rs8108468	A	G	0.02688	0.00278	3.655e-22	264000
Protein	rs8111288	A	G	0.02681	0.00278	4.666e-22	264000
Protein	rs8111399	T	G	0.02675	0.00278	5.75e-22	264000
Protein	rs8111208	A	C	-0.02676	0.00278	5.575e-22	264000
Protein	rs11083948	A	G	-0.02674	0.00278	5.929e-22	264000
Protein	rs12611201	A	G	0.02679	0.00278	5.158e-22	264000
Protein	rs12611203	A	G	0.02688	0.00278	3.739e-22	264000
Protein	rs12611211	A	G	0.02679	0.00278	5.09e-22	264000
Protein	rs12982115	A	G	-0.02681	0.00278	4.713e-22	264000
Protein	rs838145	A	G	0.0266	0.0028	2.226e-21	257000
Protein	rs12975033	A	T	-0.02704	0.00278	2.113e-22	264000
Protein	rs12975781	T	C	0.02376	0.00286	9.515e-17	256000
Protein	rs8102032	T	C	0.02702	0.00278	2.205e-22	264000
Protein	rs8104897	A	C	0.02701	0.00278	2.402e-22	264000
Protein	rs8105137	A	G	0.02706	0.00278	1.988e-22	264000
Protein	rs8106205	T	C	-0.02831	0.00277	1.468e-24	264000
Protein	rs838144	T	C	0.02862	0.00275	2.638e-25	264000
Protein	rs11667321	A	G	-0.02829	0.00277	1.561e-24	264000
Protein	rs28400015	A	G	0.027	0.00278	2.432e-22	264000
Protein	rs28400014	C	G	-0.02821	0.00277	1.994e-24	264000
Protein	rs838142	A	G	-0.01742	0.00313	2.57e-08	252000
Protein	rs28400012	T	C	0.01885	0.00344	4.293e-08	258000
Protein	rs12327653	T	C	-0.01938	0.00321	1.558e-09	258000
Protein	rs12611028	T	C	0.01981	0.0036	3.799e-08	258000
Protein	rs4015	T	C	0.02018	0.00353	1.113e-08	252000
Protein	rs8103840	T	C	0.02646	0.00283	7.661e-21	251000
Protein	rs838133	A	G	-0.03182	0.00301	4.523e-26	223000
Protein	rs35650232	T	G	-0.02362	0.004	3.383e-09	181000
Protein	rs739320	T	C	-0.02704	0.0034	1.937e-15	181000
Protein	rs2081194	C	G	0.02471	0.0034	3.413e-13	181000
Protein	rs9749209	A	G	-0.019	0.00346	4.11e-08	181000
Protein	rs499765	C	G	-0.01952	0.00317	7.772e-10	222000
Protein	rs637174	A	G	0.01916	0.00317	1.548e-09	222000
Protein	rs837629	C	G	-0.01877	0.00316	3.007e-09	222000
Protein	rs669789	T	C	-0.01871	0.00316	3.28e-09	222000
Protein	rs28567372	T	G	-0.0175	0.00314	2.455e-08	222000
Protein	rs12052128	A	G	-0.01953	0.00343	1.301e-08	189000
Protein	rs62132803	T	C	-0.02018	0.00357	1.588e-08	189000
Protein	rs604740	T	C	-0.01737	0.00314	3.03e-08	222000
Protein	rs633236	T	C	0.01723	0.00314	3.945e-08	222000
Protein	rs4802503	A	G	-0.0177	0.00302	4.851e-09	222000
Protein	rs4665972	T	C	0.01641	0.00281	5.475e-09	264000
Protein	rs1260326	T	C	0.01702	0.00281	1.403e-09	264000
Protein	rs780094	T	C	0.01752	0.00282	5.577e-10	264000
Protein	rs780093	T	C	0.01745	0.00282	6.548e-10	264000
Protein	rs445551	A	G	0.01919	0.00339	1.493e-08	205000
Protein	rs35779991	T	C	-0.01598	0.00276	6.974e-09	264000
Protein	rs1609783	A	G	0.01668	0.00276	1.487e-09	264000
Protein	rs4858694	A	G	-0.01897	0.00302	3.446e-10	264000
Protein	rs10510554	T	C	-0.01734	0.00278	4.544e-10	264000
Protein	rs4858696	T	C	0.01695	0.00278	1.041e-09	264000
Protein	rs12632128	T	G	0.01754	0.00278	2.74e-10	264000
Protein	rs12715065	A	T	0.01894	0.00302	3.468e-10	264000
Protein	rs6804842	A	G	-0.01704	0.00278	9.385e-10	264000
Protein	rs6767671	T	G	0.01738	0.00278	4.022e-10	264000
Protein	rs6808550	A	G	-0.01707	0.00278	8.422e-10	264000
Protein	rs1603977	A	T	0.01888	0.003	3.144e-10	264000
Protein	rs1603978	A	C	0.01917	0.00299	1.352e-10	264000
Protein	rs7619139	A	T	0.01747	0.0028	4.372e-10	264000
Protein	rs4858697	A	G	-0.01715	0.00279	8.362e-10	264000
Protein	rs7429279	A	C	-0.01675	0.0028	2.162e-09	264000
Protein	rs12629972	T	C	-0.01661	0.0028	2.928e-09	264000
Protein	rs12638455	A	C	0.01737	0.00279	4.633e-10	264000
Protein	rs12630658	T	C	-0.01718	0.00279	7.285e-10	264000
Protein	rs28712821	A	G	-0.02107	0.00281	6.733e-14	264000
Protein	rs11940694	A	G	0.02163	0.00281	1.351e-14	264000
Protein	rs35538052	A	G	0.02184	0.00284	1.513e-14	264000
Protein	rs12639940	A	G	-0.02178	0.00284	1.595e-14	264000
Protein	rs13130794	T	C	-0.02167	0.00284	2.27e-14	264000
Protein	rs13125440	A	G	-0.02169	0.00284	2.154e-14	264000
Protein	rs4975013	A	G	0.02144	0.00284	4.123e-14	264000
Protein	rs13146907	A	G	-0.0219	0.00284	1.24e-14	264000
Protein	rs6531716	T	C	0.01802	0.0031	6.01e-09	210000
Protein	rs6984305	A	T	0.0248	0.00435	1.173e-08	264000
Protein	rs2169387	A	G	0.02939	0.00465	2.658e-10	264000
Protein	rs2126263	A	G	-0.02862	0.00465	7.849e-10	264000
Protein	rs9987289	A	G	0.03171	0.0048	4.144e-11	264000
Protein	rs4841132	A	G	0.03226	0.00481	1.927e-11	264000
Protein	rs4841133	A	G	0.03197	0.00481	2.903e-11	264000
Protein	rs4240624	A	G	-0.03152	0.00481	5.767e-11	264000
Protein	rs6601299	T	C	0.03139	0.00459	8.021e-12	264000
Protein	rs2126259	T	C	0.03158	0.00459	5.838e-12	264000
Protein	rs1461729	A	G	0.03183	0.00459	4.087e-12	264000
Protein	rs76453951	T	C	0.02718	0.00439	6.209e-10	264000
Protein	rs11781511	A	G	0.02737	0.00435	3.05e-10	264000
Protein	rs34906420	A	G	0.02652	0.00436	1.212e-09	264000
Protein	rs13265179	A	C	0.02655	0.00433	8.868e-10	264000
Protein	rs13274716	T	C	-0.02654	0.00435	1.097e-09	264000
Protein	rs13264007	A	G	0.0265	0.00436	1.225e-09	264000
Protein	rs34025891	A	G	-0.02636	0.00433	1.168e-09	264000
Protein	rs2054345	T	C	-0.0269	0.00431	4.204e-10	264000
Protein	rs4332138	T	C	0.02642	0.00435	1.277e-09	264000
Protein	rs11782386	T	C	0.0261	0.00436	2.141e-09	264000
Protein	rs78933755	A	G	-0.02822	0.00435	8.551e-11	264000
Protein	rs66541322	T	C	0.02787	0.00435	1.471e-10	264000
Protein	rs35899262	A	C	0.0282	0.00437	1.115e-10	264000
Protein	rs11779870	A	G	0.02755	0.00432	1.836e-10	264000
Protein	rs36043919	A	C	0.02798	0.00437	1.549e-10	264000
Protein	rs35420447	A	G	0.02792	0.00437	1.686e-10	264000
Protein	rs35555151	C	G	-0.02618	0.00434	1.554e-09	264000
Protein	rs78468022	A	G	0.02712	0.00483	2.023e-08	244000
Protein	rs34523847	T	C	0.0281	0.00481	5.281e-09	244000
Protein	rs34597048	A	C	0.02868	0.00478	1.951e-09	244000
Protein	rs7357361	A	G	0.02576	0.00429	1.934e-09	264000
Protein	rs11783641	A	G	0.02703	0.00435	4.948e-10	264000
Protein	rs34403348	A	G	0.02894	0.00463	4.183e-10	264000
Protein	rs71516504	T	C	0.02898	0.00462	3.687e-10	264000
Protein	rs7008413	A	C	-0.02447	0.0043	1.313e-08	264000
Protein	rs12546198	A	G	-0.02834	0.00462	8.564e-10	264000
Sugar	rs9937053	A	G	-0.01832	0.00298	7.858e-10	231000
Sugar	rs9937354	A	G	-0.01832	0.00298	7.73e-10	231000
Sugar	rs9928094	A	G	0.01832	0.00298	7.804e-10	231000
Sugar	rs9930333	T	G	0.01949	0.00346	1.791e-08	171000
Sugar	rs9930397	A	T	-0.01834	0.00298	7.558e-10	231000
Sugar	rs9940278	T	C	-0.01833	0.00298	7.697e-10	231000
Sugar	rs9939973	A	G	-0.01833	0.00298	7.76e-10	231000
Sugar	rs9940646	C	G	0.01834	0.00298	7.495e-10	231000
Sugar	rs9940128	A	G	-0.01835	0.00298	7.268e-10	231000
Sugar	rs1421085	T	C	0.02015	0.003	1.899e-11	231000
Sugar	rs1421086	A	C	-0.01836	0.00298	7.136e-10	231000
Sugar	rs9923147	T	C	-0.01836	0.00298	7.201e-10	231000
Sugar	rs9923544	T	C	-0.01827	0.00298	8.683e-10	231000
Sugar	rs11642015	T	C	-0.02006	0.003	2.342e-11	231000
Sugar	rs1558901	A	T	0.01828	0.00298	8.463e-10	231000
Sugar	rs62048402	A	G	-0.01999	0.003	2.704e-11	231000
Sugar	rs1558902	A	T	-0.02001	0.003	2.623e-11	231000
Sugar	rs11075985	A	C	-0.01824	0.00298	9.222e-10	231000
Sugar	rs56094641	A	G	0.01998	0.003	2.734e-11	231000
Sugar	rs17817288	A	G	0.01647	0.00295	2.299e-08	231000
Sugar	rs55872725	T	C	-0.0201	0.003	2.114e-11	231000
Sugar	rs1121980	A	G	-0.01846	0.00298	5.844e-10	231000
Sugar	rs7187250	A	C	-0.0198	0.00301	4.93e-11	231000
Sugar	rs7193144	T	C	0.01973	0.00301	5.721e-11	231000
Sugar	rs62033399	T	C	-0.01974	0.00301	5.642e-11	231000
Sugar	rs62033400	A	G	0.01998	0.00301	3.357e-11	231000
Sugar	rs8063057	T	C	0.01987	0.00301	4.102e-11	231000
Sugar	rs17817449	T	G	0.01997	0.00301	3.33e-11	231000
Sugar	rs8043757	A	T	0.01986	0.00301	4.25e-11	231000
Sugar	rs9972653	T	G	-0.02029	0.00301	1.533e-11	230000
Sugar	rs17817497	T	C	0.01985	0.00301	4.456e-11	231000
Sugar	rs8050136	A	C	-0.01983	0.00301	4.608e-11	231000
Sugar	rs8051591	A	G	0.01985	0.00301	4.33e-11	231000
Sugar	rs9935401	A	G	-0.01986	0.00301	4.33e-11	231000
Sugar	rs9933509	T	C	0.0183	0.00299	9.103e-10	231000
Sugar	rs3751812	T	G	-0.02	0.00301	3.256e-11	231000
Sugar	rs3751814	A	G	-0.01988	0.00301	4.111e-11	231000
Sugar	rs9931900	A	G	0.01834	0.00299	8.494e-10	231000
Sugar	rs56313538	A	G	0.01992	0.00301	3.774e-11	231000
Sugar	rs9936385	T	C	0.01985	0.00301	4.423e-11	231000
Sugar	rs9923233	C	G	-0.01989	0.00301	3.97e-11	231000
Sugar	rs9923312	A	G	-0.01988	0.00301	4.073e-11	231000
Sugar	rs11075988	A	G	-0.01989	0.00301	3.968e-11	231000
Sugar	rs11075989	T	C	-0.0199	0.00301	3.914e-11	231000
Sugar	rs11075990	A	G	0.01989	0.00301	3.979e-11	231000
Sugar	rs11075991	A	T	0.0199	0.00301	3.947e-11	231000
Sugar	rs11075992	T	C	0.01989	0.00301	3.99e-11	231000
Sugar	rs9926289	A	G	-0.01989	0.00301	3.968e-11	231000
Sugar	rs9939609	A	T	-0.01989	0.00301	4.038e-11	231000
Sugar	rs9937709	A	G	0.01833	0.00299	8.701e-10	231000
Sugar	rs9927317	C	G	0.02046	0.0035	5.077e-09	171000
Sugar	rs17817712	A	G	0.01998	0.00301	3.378e-11	231000
Sugar	rs7206410	T	C	0.01992	0.00301	3.739e-11	231000
Sugar	rs7206629	T	C	0.01837	0.00299	7.966e-10	231000
Sugar	rs7202116	A	G	0.0199	0.00301	3.96e-11	231000
Sugar	rs7202296	A	G	0.01993	0.00301	3.661e-11	231000
Sugar	rs7201850	T	C	-0.01837	0.00299	8.017e-10	231000
Sugar	rs66908032	A	C	-0.01991	0.00301	3.826e-11	231000
Sugar	rs72803697	T	C	-0.01991	0.00301	3.874e-11	231000
Sugar	rs62033403	A	G	0.01991	0.00301	3.879e-11	231000
Sugar	rs62033404	A	G	0.0199	0.00301	3.919e-11	231000
Sugar	rs62033405	T	C	-0.02004	0.00301	2.984e-11	231000
Sugar	rs7206122	A	G	-0.02003	0.00301	2.901e-11	231000
Sugar	rs7190396	T	G	0.02003	0.00301	2.961e-11	231000
Sugar	rs7185735	A	G	0.02001	0.00301	3.103e-11	231000
Sugar	rs79994966	T	C	0.02003	0.00301	3.045e-11	231000
Sugar	rs62033406	A	G	0.01885	0.00299	3.07e-10	231000
Sugar	rs9941349	T	C	-0.01852	0.00299	5.871e-10	231000
Sugar	rs28567725	T	C	0.01849	0.00299	6.316e-10	231000
Sugar	rs9931494	C	G	0.0184	0.00299	7.658e-10	231000
Sugar	rs10468280	A	G	0.01997	0.00301	3.445e-11	231000
Sugar	rs62033408	A	G	0.01993	0.00301	3.772e-11	231000
Sugar	rs17817964	T	C	-0.01988	0.00301	4.234e-11	231000
Sugar	rs62033413	C	G	0.01749	0.00299	4.974e-09	231000
Sugar	rs9930506	A	G	0.01632	0.00297	3.95e-08	231000
Sugar	rs9922708	T	C	-0.01637	0.00297	3.583e-08	231000
Sugar	rs72805611	T	C	-0.01763	0.00299	3.81e-09	231000
Sugar	rs9922619	T	G	-0.01622	0.00297	4.797e-08	231000
Sugar	rs7188250	T	C	0.01739	0.00299	6.127e-09	231000
Sugar	rs72805612	A	G	-0.01746	0.00299	5.484e-09	231000
Sugar	rs11075993	T	G	-0.0176	0.00299	3.989e-09	231000
Sugar	rs72805613	A	G	0.01744	0.00299	5.581e-09	231000
Sugar	rs12149574	C	G	0.0174	0.00299	6.017e-09	231000
Sugar	rs12149832	A	G	-0.01761	0.00299	3.923e-09	231000
Sugar	rs11649091	T	G	0.01722	0.00298	7.162e-09	230000
Sugar	rs11642841	A	C	-0.01764	0.0031	1.236e-08	218000
Sugar	rs8084696	T	G	-0.02595	0.00417	4.638e-10	230000
Sugar	rs67422659	A	G	0.02579	0.00406	2.165e-10	230000
Sugar	rs68063877	A	G	0.02474	0.00403	8.563e-10	230000
Sugar	rs72865571	A	G	0.02571	0.00416	6.222e-10	231000
Sugar	rs9646485	A	G	-0.02571	0.00416	6.23e-10	231000
Sugar	rs755473	A	G	0.02585	0.00415	4.876e-10	231000
Sugar	rs79395477	T	C	-0.02574	0.00416	5.866e-10	231000
Sugar	rs1371274	A	C	0.02907	0.00428	1.134e-11	231000
Sugar	rs1371273	A	G	-0.02904	0.00428	1.191e-11	231000
Sugar	rs1371272	A	G	-0.02894	0.00428	1.424e-11	231000
Sugar	rs72867237	A	T	0.02897	0.00429	1.391e-11	231000
Sugar	rs9955276	T	C	-0.02922	0.00418	2.915e-12	230000
Sugar	rs8097544	A	G	0.02945	0.00418	1.774e-12	230000
Sugar	rs8097672	A	T	0.02953	0.00418	1.542e-12	230000
Sugar	rs60764613	T	G	-0.02939	0.00418	2.066e-12	230000
Sugar	rs7238896	A	G	0.02901	0.00424	7.8e-12	230000
Sugar	rs9958909	T	G	0.02914	0.00425	7.236e-12	230000
Sugar	rs2165127	A	G	-0.02342	0.00394	2.817e-09	210000
Sugar	rs1898874	T	C	-0.02676	0.00431	5.13e-10	230000
Sugar	rs56079333	T	C	0.0253	0.00426	2.95e-09	230000
Sugar	rs8091804	T	C	0.02561	0.00424	1.571e-09	230000
Sugar	rs9964229	T	C	-0.02458	0.00409	1.885e-09	230000
Sugar	rs55804009	A	C	-0.02539	0.00424	2.092e-09	230000
Sugar	rs56042504	A	G	-0.02582	0.00426	1.396e-09	230000
Sugar	rs7243676	A	G	-0.02406	0.00409	3.942e-09	230000
Sugar	rs7226371	A	G	0.02422	0.00409	3.088e-09	230000
Sugar	rs7230605	T	C	0.02399	0.00409	4.319e-09	230000
Sugar	rs9959497	A	G	-0.02457	0.00406	1.405e-09	230000
Sugar	rs8090698	A	G	-0.02415	0.00404	2.209e-09	230000
Sugar	rs16942148	T	C	-0.02432	0.00414	4.343e-09	231000
Sugar	rs7242258	T	C	-0.02441	0.00414	3.886e-09	230000
Sugar	rs7226473	C	G	-0.02388	0.00404	3.307e-09	230000
Sugar	rs7226804	A	G	-0.02437	0.00414	4.076e-09	230000
Sugar	rs9967364	T	G	0.0247	0.00415	2.587e-09	231000
Sugar	rs1821971	T	C	0.02479	0.00415	2.282e-09	231000
Sugar	rs55960823	C	G	0.02639	0.00482	4.413e-08	171000
Sugar	rs28816986	A	G	0.02443	0.00414	3.748e-09	231000
Sugar	rs1989098	T	C	-0.0245	0.00415	3.418e-09	231000
Sugar	rs1989097	A	G	0.02441	0.00414	3.845e-09	231000
Sugar	rs28572296	T	C	-0.02444	0.00415	3.696e-09	231000
Sugar	rs58252987	A	G	-0.02421	0.00414	5.128e-09	231000
Sugar	rs9964745	A	G	-0.02453	0.00415	3.25e-09	231000
Sugar	rs9966126	A	T	-0.0245	0.00415	3.459e-09	231000
Sugar	rs9953530	A	T	0.02418	0.00415	5.738e-09	231000
Sugar	rs9946728	A	G	-0.02404	0.00415	6.943e-09	231000
Sugar	rs1073006	A	G	-0.02342	0.00415	1.631e-08	231000
Sugar	rs2289322	T	G	-0.02338	0.00414	1.604e-08	231000
Sugar	rs9646457	T	C	0.02471	0.00418	3.38e-09	231000
Sugar	rs12150840	A	G	0.02474	0.00418	3.202e-09	231000
Sugar	rs73374119	A	G	0.02439	0.00417	5.088e-09	231000
Sugar	rs28372460	T	G	-0.02458	0.0044	2.232e-08	222000
Sugar	rs11080899	T	C	-0.02458	0.0044	2.289e-08	222000
Sugar	rs11080900	T	C	0.0246	0.0044	2.208e-08	222000
Sugar	rs28608619	A	G	0.02445	0.00437	2.271e-08	222000
Sugar	rs173149	A	G	0.01804	0.00327	3.282e-08	230000
Sugar	rs341220	A	G	-0.01783	0.00309	8.029e-09	230000
Sugar	rs193171	T	G	-0.01779	0.00309	8.83e-09	230000
Sugar	rs341228	T	C	0.01863	0.00313	2.724e-09	230000
Sugar	rs341230	T	C	-0.01763	0.00309	1.197e-08	230000
Sugar	rs341234	A	T	0.01765	0.00309	1.174e-08	230000
Sugar	rs4797242	A	C	0.01786	0.00322	2.934e-08	230000
Sugar	rs6857	T	C	0.02371	0.004	3.119e-09	225000
Sugar	rs769449	A	G	0.0264	0.00455	6.334e-09	225000
Sugar	rs429358	T	C	-0.02769	0.00416	2.971e-11	225000
Sugar	rs10414043	A	G	0.02588	0.00451	9.346e-09	225000
Sugar	rs7256200	T	G	0.02574	0.0045	1.11e-08	225000
Sugar	rs12721051	C	G	-0.02615	0.00396	4.074e-11	211000
Sugar	rs56131196	A	G	0.02607	0.00396	4.483e-11	211000
Sugar	rs4420638	A	G	-0.026	0.00396	5.082e-11	211000
Sugar	rs8111874	A	G	0.01805	0.00319	1.56e-08	198000
Sugar	rs12462111	T	C	0.01828	0.00319	1.005e-08	198000
Sugar	rs368565	T	C	-0.01994	0.00314	2.284e-10	205000
Sugar	rs35106244	T	C	0.02402	0.00319	5.165e-14	198000
Sugar	rs679574	C	G	-0.02273	0.00298	2.584e-14	225000
Sugar	rs516316	C	G	0.02269	0.00298	2.808e-14	225000
Sugar	rs516246	T	C	0.02267	0.00298	2.942e-14	225000
Sugar	rs492602	A	G	-0.02256	0.00298	3.942e-14	225000
Sugar	rs681343	T	C	0.02252	0.00298	4.389e-14	225000
Sugar	rs281377	T	C	-0.02126	0.00301	1.535e-12	225000
Sugar	rs601338	A	G	0.02271	0.00298	2.632e-14	225000
Sugar	rs602662	A	G	0.02539	0.00299	1.879e-17	225000
Sugar	rs485186	A	G	-0.02566	0.00299	8.789e-18	225000
Sugar	rs485073	A	G	-0.02584	0.00299	5.187e-18	225000
Sugar	rs603985	T	C	-0.02582	0.00299	5.478e-18	225000
Sugar	rs571689	T	C	0.02524	0.00299	2.892e-17	225000
Sugar	rs570794	T	C	-0.02522	0.00299	3.071e-17	225000
Sugar	rs569970	T	C	-0.0252	0.00299	3.188e-17	225000
Sugar	rs2251034	A	G	0.02534	0.00299	2.176e-17	225000
Sugar	rs507855	A	G	-0.02496	0.00299	6.438e-17	225000
Sugar	rs507766	T	C	-0.02511	0.00299	4.233e-17	225000
Sugar	rs507711	T	C	0.02512	0.00299	4.022e-17	225000
Sugar	rs506897	C	G	0.02521	0.00299	3.08e-17	225000
Sugar	rs504963	A	G	0.02539	0.00299	1.862e-17	225000
Sugar	rs632111	A	G	-0.02533	0.00299	2.204e-17	225000
Sugar	rs503279	T	C	-0.0252	0.00299	3.191e-17	225000
Sugar	rs633372	A	G	0.0254	0.00299	1.84e-17	225000
Sugar	rs2548459	T	C	-0.0253	0.00299	2.457e-17	225000
Sugar	rs692854	A	C	0.02554	0.00299	1.217e-17	225000
Sugar	rs1704773	A	G	-0.02574	0.00299	6.722e-18	225000
Sugar	rs646327	A	G	-0.0265	0.00299	7.056e-19	225000
Sugar	rs2638281	A	G	-0.02161	0.00304	1.118e-12	224000
Sugar	rs676388	T	C	-0.02641	0.00299	9.414e-19	225000
Sugar	rs584768	A	G	0.02602	0.00299	2.956e-18	225000
Sugar	rs2452170	A	G	0.02604	0.00299	2.841e-18	225000
Sugar	rs2638282	A	G	0.02606	0.00299	2.636e-18	225000
Sugar	rs281378	A	G	-0.02002	0.00314	1.775e-10	224000
Sugar	rs281379	A	G	0.0258	0.00298	5.29e-18	225000
Sugar	rs281380	T	C	0.0188	0.0031	1.254e-09	225000
Sugar	rs281381	T	C	0.02066	0.00315	5.82e-11	224000
Sugar	rs4002471	T	C	0.02681	0.00299	3.372e-19	224000
Sugar	rs204248	C	G	-0.02051	0.00316	8.072e-11	224000
Sugar	rs281386	A	G	0.02063	0.00315	6.136e-11	224000
Sugar	rs35866622	T	C	0.02465	0.00299	1.547e-16	224000
Sugar	rs33988101	T	G	0.02677	0.00295	1.332e-19	230000
Sugar	rs12978750	A	G	-0.02672	0.00295	1.555e-19	230000
Sugar	rs12978752	A	C	-0.02672	0.00295	1.54e-19	230000
Sugar	rs12979278	T	C	0.02641	0.00295	3.94e-19	230000
Sugar	rs660745	T	C	-0.02641	0.00295	3.885e-19	230000
Sugar	rs11672900	A	G	-0.02656	0.00295	2.408e-19	230000
Sugar	rs281395	C	G	0.02087	0.00312	2.258e-11	228000
Sugar	rs281394	C	G	0.02075	0.0031	2.326e-11	230000
Sugar	rs546308	A	G	0.02046	0.003	9.62e-12	230000
Sugar	rs629504	C	G	-0.02042	0.003	1.055e-11	230000
Sugar	rs3859439	T	C	-0.02037	0.003	1.175e-11	230000
Sugar	rs281393	T	C	-0.02054	0.0031	3.56e-11	230000
Sugar	rs519757	A	C	-0.02014	0.003	2.013e-11	230000
Sugar	rs11882796	A	T	-0.02588	0.00295	1.807e-18	230000
Sugar	rs11666792	A	G	0.02628	0.00295	5.051e-19	230000
Sugar	rs12979891	T	C	0.02631	0.00295	4.702e-19	230000
Sugar	rs11878908	T	C	0.02616	0.00295	7.538e-19	230000
Sugar	rs2287921	T	C	-0.0261	0.00295	8.707e-19	231000
Sugar	rs479486	A	G	0.02529	0.00296	1.18e-17	230000
Sugar	rs8112983	T	C	-0.02606	0.00295	9.961e-19	230000
Sugar	rs2287922	A	G	0.02613	0.00295	7.917e-19	230000
Sugar	rs281407	A	G	-0.02103	0.00327	1.206e-10	217000
Sugar	rs281408	A	C	-0.0261	0.00298	2.193e-18	231000
Sugar	rs412712	A	T	0.02606	0.00298	2.512e-18	231000
Sugar	rs439523	T	C	-0.02659	0.00295	1.924e-19	231000
Sugar	rs12979144	A	G	-0.02632	0.00298	1.143e-18	230000
Sugar	rs12978499	A	C	0.02635	0.00298	1.034e-18	230000
Sugar	rs418464	T	C	-0.02744	0.00295	1.222e-20	231000
Sugar	rs452270	T	C	-0.02779	0.00299	1.457e-20	224000
Sugar	rs1231281	A	G	0.02729	0.00295	2.014e-20	231000
Sugar	rs12981072	C	G	0.0258	0.00297	3.684e-18	230000
Sugar	rs380743	A	G	0.02704	0.00299	1.56e-19	224000
Sugar	rs427248	T	C	0.02714	0.00299	1.144e-19	224000
Sugar	rs56066508	T	C	-0.02623	0.00297	1.039e-18	231000
Sugar	rs973579	A	G	-0.02725	0.00295	2.206e-20	231000
Sugar	rs2307018	A	C	-0.02512	0.00298	3.1e-17	231000
Sugar	rs2307019	A	G	-0.02499	0.00297	4.343e-17	231000
Sugar	rs838147	A	G	0.02732	0.00295	1.795e-20	231000
Sugar	rs12462324	A	G	0.02547	0.00297	1.062e-17	231000
Sugar	rs12460295	T	G	0.02543	0.00297	1.187e-17	231000
Sugar	rs11672046	T	C	-0.02552	0.00297	9.074e-18	231000
Sugar	rs8108136	T	C	-0.0255	0.00297	9.778e-18	231000
Sugar	rs8108468	A	G	-0.02547	0.00297	1.074e-17	231000
Sugar	rs8111288	A	G	-0.02545	0.00297	1.135e-17	231000
Sugar	rs8111399	T	G	-0.02538	0.00297	1.38e-17	231000
Sugar	rs8111208	A	C	0.02533	0.00297	1.594e-17	231000
Sugar	rs11083948	A	G	0.02538	0.00297	1.387e-17	231000
Sugar	rs12611201	A	G	-0.02538	0.00297	1.388e-17	231000
Sugar	rs12611203	A	G	-0.02537	0.00297	1.422e-17	231000
Sugar	rs12611211	A	G	-0.02538	0.00297	1.362e-17	231000
Sugar	rs12982115	A	G	0.02537	0.00297	1.444e-17	231000
Sugar	rs838145	A	G	-0.02603	0.00301	4.637e-18	224000
Sugar	rs12975033	A	T	0.0254	0.00297	1.308e-17	230000
Sugar	rs12975781	T	C	-0.0233	0.00307	3.011e-14	223000
Sugar	rs8102032	T	C	-0.02539	0.00297	1.358e-17	230000
Sugar	rs8104897	A	C	-0.02539	0.00297	1.354e-17	230000
Sugar	rs8105137	A	G	-0.02539	0.00297	1.371e-17	230000
Sugar	rs8106205	T	C	0.02702	0.00296	7.582e-20	230000
Sugar	rs838144	T	C	-0.02756	0.00295	8.527e-21	230000
Sugar	rs11667321	A	G	0.02707	0.00296	6.283e-20	230000
Sugar	rs28400015	A	G	-0.02556	0.00297	8.495e-18	230000
Sugar	rs28400014	C	G	0.02707	0.00296	6.319e-20	230000
Sugar	rs838140	T	C	-0.01913	0.00346	3.303e-08	218000
Sugar	rs4015	T	C	-0.02149	0.0038	1.498e-08	218000
Sugar	rs8103840	T	C	-0.02799	0.00304	3.07e-20	218000
Sugar	rs838133	A	G	0.03014	0.00327	2.911e-20	189000
Sugar	rs35650232	T	G	0.02269	0.004	1.347e-08	181000
Sugar	rs739320	T	C	0.02716	0.0034	1.472e-15	181000
Sugar	rs2081194	C	G	-0.02558	0.0034	4.891e-14	181000
Sugar	rs9749209	A	G	0.02084	0.00346	1.789e-09	181000
Sugar	rs499765	C	G	0.0217	0.00343	2.674e-10	188000
Sugar	rs637174	A	G	-0.02149	0.00344	4.015e-10	188000
Sugar	rs837629	C	G	0.02079	0.00343	1.29e-09	188000
Sugar	rs669789	T	C	0.02073	0.00342	1.407e-09	189000
Sugar	rs28567372	T	G	0.01929	0.0034	1.393e-08	189000
Sugar	rs12052128	A	G	0.01923	0.00343	2.145e-08	189000
Sugar	rs62132802	T	C	-0.02017	0.00353	1.066e-08	189000
Sugar	rs604740	T	C	0.01898	0.0034	2.29e-08	189000
Sugar	rs633236	T	C	-0.01877	0.0034	3.325e-08	189000
Sugar	rs62132808	T	G	0.01967	0.00351	2.166e-08	181000
Sugar	rs4802503	A	G	0.02047	0.00328	4.337e-10	189000
Sugar	rs1030321	T	C	-0.01847	0.00324	1.248e-08	231000
Sugar	rs1559621	T	C	-0.01822	0.00326	2.31e-08	231000
Sugar	rs12713415	C	G	-0.01911	0.00327	4.88e-09	228000
Sugar	rs4858693	A	G	-0.02048	0.00303	1.423e-11	222000
Sugar	rs1603993	A	T	0.0207	0.00298	3.762e-12	230000
Sugar	rs9847186	A	G	0.02044	0.00298	6.674e-12	231000
Sugar	rs6550938	T	C	-0.01905	0.00304	3.429e-10	218000
Sugar	rs7618975	A	C	-0.0221	0.00302	2.579e-13	230000
Sugar	rs35779991	T	C	0.02108	0.00295	9.484e-13	230000
Sugar	rs1609783	A	G	-0.0213	0.00295	5.456e-13	230000
Sugar	rs4858694	A	G	0.02174	0.00323	1.735e-11	230000
Sugar	rs10510554	T	C	0.0229	0.00297	1.375e-14	230000
Sugar	rs4858696	T	C	-0.02258	0.00297	2.919e-14	230000
Sugar	rs12632128	T	G	-0.0229	0.00297	1.293e-14	230000
Sugar	rs12715065	A	T	-0.02132	0.00323	3.931e-11	231000
Sugar	rs6804842	A	G	0.02324	0.00298	6.207e-15	231000
Sugar	rs6767671	T	G	-0.02284	0.00297	1.532e-14	230000
Sugar	rs6808550	A	G	0.02297	0.00298	1.218e-14	230000
Sugar	rs1603977	A	T	-0.02106	0.00321	5.493e-11	230000
Sugar	rs1603978	A	C	-0.02056	0.00319	1.209e-10	230000
Sugar	rs7619139	A	T	-0.0243	0.003	4.984e-16	230000
Sugar	rs4858697	A	G	0.02359	0.00299	2.946e-15	230000
Sugar	rs7429279	A	C	0.0235	0.003	4.502e-15	230000
Sugar	rs12629972	T	C	0.0231	0.003	1.257e-14	230000
Sugar	rs12638455	A	C	-0.02267	0.00299	3.225e-14	230000
Sugar	rs12630658	T	C	0.02268	0.00299	3.195e-14	230000
Sugar	rs4353774	A	C	0.02041	0.00302	1.463e-11	230000
Sugar	rs62228593	T	C	0.01699	0.00309	3.895e-08	230000
Sugar	rs4858144	A	G	-0.01687	0.00307	4.119e-08	230000
Sugar	rs767823	T	C	-0.01677	0.00307	4.921e-08	230000
Sugar	rs7639228	A	T	0.0169	0.00308	3.97e-08	230000
Sugar	rs4623240	A	C	-0.02004	0.00357	1.949e-08	230000
Sugar	rs67271941	A	C	0.02004	0.00357	1.947e-08	230000
Sugar	rs34506826	T	C	-0.02005	0.00357	1.907e-08	230000
Sugar	rs13202107	A	G	-0.02016	0.00358	1.768e-08	230000
Sugar	rs7012637	A	G	0.01843	0.00298	6.528e-10	225000
Sugar	rs7012814	A	G	0.01856	0.00298	4.994e-10	225000
