# Supplementary material for: Unveiling the influence of daily dietary patterns on brain cortical structure: insights from bidirectional Mendelian randomization
Source: Royal Society of Chemistry journal article supplement (doi:10.1039/d3fo02879h), 2023-01-01
Supplement: d3fo02879h3.xlsx [file d3fo02879h3.xlsx]

## Sheet: Food
Supplementary Table 3.1 Detailed information of instrumental variables used in MR analyses
Diet type (exposure)	Cortical regions (outcome)	SNP	Effect allele	Other allele	Exposure (Diet type)				Outcome (Cortical regions)
					Beta	SE	F	P-value	Beta	SE	P-value	mr_keep
alcohol_overallfreq	SA_rostralanteriorcingulate	rs1004787	G	A	-0.0160002	0.00209645	58.25	1.4e-14	2.6615	0.8739	0.002322	TRUE
		rs10188314	C	T	-0.0117657	0.00208842	31.74	1.8e-08	-2.2325	0.8945	0.01257	TRUE
		rs10752651	C	T	0.0119533	0.00210239	32.33	1.4e-08	1.9964	0.8785	0.02306	TRUE
		rs1104608	G	C	0.0120939	0.0021271	32.33	1.5e-08	0.9058	0.9645	0.3477	FALSE
		rs111633004	G	A	0.0164402	0.00280881	34.26	3.9e-09	0.9306	1.2301	0.4493	TRUE
		rs11223617	G	A	0.0179378	0.00258503	48.15	3e-12	0.4679	1.0452	0.6544	TRUE
		rs113441031	C	T	0.0189582	0.00278664	46.28	1e-11	-2.267	1.2189	0.06291	TRUE
		rs113784412	C	T	0.0120679	0.00225529	28.63	4.7e-08	-1.1084	1.01	0.2724	TRUE
		rs11640905	C	T	0.0136055	0.00236631	33.06	8.4e-09	-0.7352	0.9572	0.4424	TRUE
		rs117799466	G	C	-0.0135119	0.00228461	34.98	2.5e-09	1.0794	1.3104	0.4101	TRUE
		rs11787216	C	T	0.0165099	0.00220283	56.17	6.1e-14	1.8427	0.9293	0.04738	TRUE
		rs118188698	T	C	-0.0282162	0.00467962	36.36	3.2e-09	-2.0973	1.892	0.2676	TRUE
		rs11940694	A	G	-0.032249	0.00215124	224.73	5.5e-51	-0.3971	0.8771	0.6507	TRUE
		rs1228589	G	A	0.0136362	0.00242876	31.52	2.1e-08	0.6213	1.0278	0.5455	TRUE
		rs1229984	T	C	-0.191657	0.00672086	813.2	1.1e-179	-3.953	2.4051	0.1003	TRUE
		rs12945575	C	T	0.0132978	0.00241716	30.27	4.5e-08	4.498	1.0493	1.815e-05	TRUE
		rs13102973	T	C	-0.0119604	0.00214896	30.98	2.9e-08	-0.1058	0.9033	0.9068	TRUE
		rs13135092	A	G	0.0343879	0.00379233	82.22	1.6e-19	-1.0739	1.7765	0.5455	TRUE
		rs1377491	A	T	-0.0146666	0.00257201	32.52	1.5e-08	-1.056	1.0862	0.331	TRUE
		rs1421085	T	C	0.0158428	0.00212442	55.61	8.3e-14	1.3689	0.8749	0.1177	TRUE
		rs149971103	A	G	-0.0461066	0.00823543	31.34	2e-08	6.9177	3.4394	0.04429	TRUE
		rs1592732	C	G	-0.0160796	0.00286552	31.49	2.9e-08	0.0617	1.2322	0.9601	TRUE
		rs17690703	C	T	0.0178617	0.00236181	57.19	3.4e-14	2.5864	1.3394	0.05349	TRUE
		rs17698314	C	A	-0.0135938	0.00242682	31.38	1.5e-08	2.0904	0.9872	0.03422	TRUE
		rs1788030	C	T	0.0141903	0.00210996	45.23	3.9e-11	0.1824	0.8763	0.8351	TRUE
		rs2009367	T	G	0.0126918	0.00227541	31.11	2.2e-08	-0.8921	0.9499	0.3477	TRUE
		rs2042073	A	G	-0.0122698	0.00213043	33.17	1.2e-08	-0.7572	0.8836	0.3915	TRUE
		rs2181328	A	G	-0.0148719	0.00232633	40.87	1.7e-10	-1.1179	0.952	0.2403	TRUE
		rs2237021	T	C	-0.0120319	0.00208578	33.28	4.1e-09	-0.4577	0.8609	0.595	TRUE
		rs2244598	T	C	-0.0125451	0.00214683	34.15	3.5e-09	0.4621	0.9784	0.6367	TRUE
		rs2411453	T	G	-0.0229342	0.00212762	116.19	4.3e-27	-0.7535	1.1401	0.5087	TRUE
		rs2533196	G	A	-0.012464	0.00212227	34.49	3.1e-09	1.1913	1.3087	0.3627	TRUE
		rs2717063	C	A	-0.0127328	0.00212267	35.98	1.4e-09	0.0552	0.8814	0.9501	TRUE
		rs2799056	A	G	-0.0129707	0.00213975	36.75	8.4e-10	-1.5464	1.1027	0.1608	TRUE
		rs2858088	A	G	-0.0138429	0.00214813	41.53	1.6e-10	0.7616	0.9175	0.4065	TRUE
		rs28741121	G	A	-0.0164216	0.00279583	34.5	5.6e-09	-3.5026	1.5972	0.02831	TRUE
		rs33705	T	C	0.0146318	0.00218	45.05	2e-11	1.5831	0.9006	0.07878	TRUE
		rs34473884	G	A	-0.0135071	0.00241042	31.4	3.1e-08	-1.3961	1.0552	0.1858	TRUE
		rs35105141	C	T	0.0176807	0.00212643	69.13	1.3e-16	0.864	0.8832	0.328	TRUE
		rs4135294	G	A	-0.0161401	0.00296311	29.67	4.6e-08	-0.8553	1.2632	0.4983	TRUE
		rs4241258	C	T	0.0173541	0.00303033	32.8	1.2e-08	-1.1196	1.2687	0.3775	TRUE
		rs4726481	G	T	0.0142611	0.00213608	44.57	2.1e-11	1.4473	0.9733	0.137	TRUE
		rs4739105	T	C	-0.015147	0.00257732	34.54	3.9e-09	0.2308	1.075	0.83	TRUE
		rs489062	G	A	0.0117857	0.00210267	31.42	1.8e-08	0.1493	0.8854	0.8661	TRUE
		rs56403963	C	G	-0.0167354	0.00277526	36.36	6.2e-09	0.3728	1.0997	0.7346	TRUE
		rs58905411	G	A	-0.0176391	0.00212185	69.11	9.9e-17	-2.1546	0.9083	0.01769	TRUE
		rs59979824	C	A	0.0130534	0.00220135	35.16	3.5e-09	-0.2843	1.0273	0.782	TRUE
		rs6030200	G	A	-0.0130972	0.00225312	33.79	5.3e-09	-0.2047	0.9232	0.8246	TRUE
		rs60815182	A	G	0.0170549	0.00281483	36.71	1.5e-09	-0.5346	1.2212	0.6615	TRUE
		rs61873510	G	T	0.0132923	0.00227806	34.05	3.6e-09	1.9662	1.0615	0.06398	TRUE
		rs62305780	C	G	-0.0351743	0.00348387	101.94	3.3e-24	0.8678	1.4288	0.5436	TRUE
		rs62339673	C	A	0.0117197	0.00217186	29.12	3.7e-08	-0.4069	0.9191	0.658	TRUE
		rs62466318	C	T	-0.0191458	0.00259693	54.35	3e-13	1.0816	1.1246	0.3362	TRUE
		rs6567160	T	C	0.016318	0.00246829	43.71	2.1e-11	-0.7058	1.0079	0.4837	TRUE
		rs6887940	G	A	-0.0135386	0.00209305	41.84	7.7e-11	-0.015	0.9024	0.9868	TRUE
		rs72806111	A	G	-0.0136844	0.00246467	30.83	3.8e-08	0.0137	0.9908	0.989	TRUE
		rs7460106	T	C	-0.0136271	0.00249478	29.84	4.9e-08	-0.4071	1.175	0.729	TRUE
		rs7514579	A	C	0.0141805	0.00247542	32.82	5e-09	-0.2188	1.0518	0.8352	TRUE
		rs7586023	C	G	-0.0145694	0.00223511	42.49	5.3e-11	-0.8238	0.9373	0.3794	TRUE
		rs7630012	A	G	0.0121156	0.00210034	33.27	9.6e-09	-0.7497	0.8697	0.3887	TRUE
		rs780094	T	C	-0.0361306	0.00214042	284.94	6.7e-64	-0.7798	0.8809	0.376	TRUE
		rs780569	T	A	0.0142432	0.00231521	37.85	1.2e-09	0.6112	0.9732	0.53	TRUE
		rs7948028	A	C	0.0116155	0.00215657	29.01	4.1e-08	-1.6488	0.8965	0.06588	TRUE
		rs8043563	G	C	0.0161098	0.00238964	45.45	1.6e-11	0.2655	1.044	0.7992	TRUE
		rs838145	G	A	0.0167516	0.00211101	62.97	1.3e-15	0.5634	0.917	0.5389	TRUE
		rs891389	C	T	0.0180764	0.00219462	67.84	4.3e-16	1.6319	0.9326	0.08015	TRUE
		rs9349379	A	G	-0.0131704	0.00212349	38.47	7.6e-10	0.7203	0.9086	0.4279	TRUE
		rs9372625	G	A	-0.0174688	0.00215312	65.82	4.6e-16	-1.4586	0.9082	0.1083	TRUE
		rs9615905	C	T	0.0114257	0.00209368	29.78	3.8e-08	0.4036	0.8765	0.6452	TRUE
		rs9646538	G	T	-0.0124481	0.00216639	33.02	5.4e-09	0.8738	0.8747	0.3178	TRUE
		rs9842406	T	G	-0.0139203	0.0021065	43.67	2.6e-11	-1.4416	0.8648	0.09551	TRUE
		rs9866322	T	C	-0.016732	0.00250702	44.54	3.8e-11	1.4879	1.0469	0.1553	TRUE
alcohol_overallfreq	THICK_frontalpole	rs1004787	G	A	-0.0160002	0.00209645	58.25	1.4e-14	-0.002	0.002	0.3254	TRUE
		rs10188314	C	T	-0.0117657	0.00208842	31.74	1.8e-08	0.0012	0.002	0.5606	TRUE
		rs10752651	C	T	0.0119533	0.00210239	32.33	1.4e-08	-0.0006	0.002	0.7651	TRUE
		rs1104608	G	C	0.0120939	0.0021271	32.33	1.5e-08	0.0008	0.0022	0.7117	FALSE
		rs111633004	G	A	0.0164402	0.00280881	34.26	3.9e-09	0.0028	0.0028	0.3243	TRUE
		rs11223617	G	A	0.0179378	0.00258503	48.15	3e-12	0.0004	0.0024	0.8612	TRUE
		rs113441031	C	T	0.0189582	0.00278664	46.28	1e-11	0.002	0.0028	0.4722	TRUE
		rs113784412	C	T	0.0120679	0.00225529	28.63	4.7e-08	-0.0009	0.0023	0.6982	TRUE
		rs11640905	C	T	0.0136055	0.00236631	33.06	8.4e-09	0.0008	0.0022	0.7024	TRUE
		rs117799466	G	C	-0.0135119	0.00228461	34.98	2.5e-09	-0.0018	0.003	0.5534	TRUE
		rs11787216	C	T	0.0165099	0.00220283	56.17	6.1e-14	-0.0025	0.0021	0.2439	TRUE
		rs118188698	T	C	-0.0282162	0.00467962	36.36	3.2e-09	0.0052	0.0044	0.2396	TRUE
		rs11940694	A	G	-0.032249	0.00215124	224.73	5.5e-51	-0.0025	0.002	0.2204	TRUE
		rs1228589	G	A	0.0136362	0.00242876	31.52	2.1e-08	-0.0023	0.0024	0.3223	TRUE
		rs1229984	T	C	-0.191657	0.00672086	813.2	1.1e-179	-0.004	0.0057	0.4801	TRUE
		rs12945575	C	T	0.0132978	0.00241716	30.27	4.5e-08	0.0014	0.0024	0.5759	TRUE
		rs13102973	T	C	-0.0119604	0.00214896	30.98	2.9e-08	-0.0005	0.0021	0.7988	TRUE
		rs13135092	A	G	0.0343879	0.00379233	82.22	1.6e-19	0.0018	0.0041	0.67	TRUE
		rs1377491	A	T	-0.0146666	0.00257201	32.52	1.5e-08	0.0015	0.0025	0.5366	TRUE
		rs1421085	T	C	0.0158428	0.00212442	55.61	8.3e-14	0.0043	0.002	0.03209	TRUE
		rs149971103	A	G	-0.0461066	0.00823543	31.34	2e-08	0.0111	0.0079	0.1623	TRUE
		rs1592732	C	G	-0.0160796	0.00286552	31.49	2.9e-08	-0.0053	0.0028	0.06176	TRUE
		rs17690703	C	T	0.0178617	0.00236181	57.19	3.4e-14	-0.0037	0.003	0.2188	TRUE
		rs17698314	C	A	-0.0135938	0.00242682	31.38	1.5e-08	-0.0015	0.0023	0.5183	TRUE
		rs1788030	C	T	0.0141903	0.00210996	45.23	3.9e-11	-0.0002	0.002	0.9344	TRUE
		rs2009367	T	G	0.0126918	0.00227541	31.11	2.2e-08	0.0023	0.0022	0.2965	TRUE
		rs2042073	A	G	-0.0122698	0.00213043	33.17	1.2e-08	-0.0053	0.002	0.009702	TRUE
		rs2181328	A	G	-0.0148719	0.00232633	40.87	1.7e-10	-0.0023	0.0022	0.2896	TRUE
		rs2237021	T	C	-0.0120319	0.00208578	33.28	4.1e-09	0.0005	0.002	0.788	TRUE
		rs2244598	T	C	-0.0125451	0.00214683	34.15	3.5e-09	-0.0075	0.0023	0.0008946	TRUE
		rs2411453	T	G	-0.0229342	0.00212762	116.19	4.3e-27	-0.0007	0.0026	0.7736	TRUE
		rs2533196	G	A	-0.012464	0.00212227	34.49	3.1e-09	-0.0023	0.0029	0.4235	TRUE
		rs2717063	C	A	-0.0127328	0.00212267	35.98	1.4e-09	0.0005	0.002	0.8065	TRUE
		rs2799056	A	G	-0.0129707	0.00213975	36.75	8.4e-10	-0.0019	0.0025	0.4476	TRUE
		rs2858088	A	G	-0.0138429	0.00214813	41.53	1.6e-10	-0.0004	0.0021	0.8589	TRUE
		rs28741121	G	A	-0.0164216	0.00279583	34.5	5.6e-09	-0.001	0.0037	0.7927	TRUE
		rs33705	T	C	0.0146318	0.00218	45.05	2e-11	0.0044	0.0021	0.03408	TRUE
		rs34473884	G	A	-0.0135071	0.00241042	31.4	3.1e-08	-0.0017	0.0024	0.4803	TRUE
		rs35105141	C	T	0.0176807	0.00212643	69.13	1.3e-16	-0.0028	0.002	0.1637	TRUE
		rs4135294	G	A	-0.0161401	0.00296311	29.67	4.6e-08	0.0031	0.0029	0.2963	TRUE
		rs4241258	C	T	0.0173541	0.00303033	32.8	1.2e-08	0.0005	0.003	0.8655	TRUE
		rs4726481	G	T	0.0142611	0.00213608	44.57	2.1e-11	-0.0003	0.0022	0.9073	TRUE
		rs4739105	T	C	-0.015147	0.00257732	34.54	3.9e-09	-0.0033	0.0025	0.1836	TRUE
		rs489062	G	A	0.0117857	0.00210267	31.42	1.8e-08	0.0029	0.002	0.1558	TRUE
		rs56403963	C	G	-0.0167354	0.00277526	36.36	6.2e-09	-0.0053	0.0025	0.03717	TRUE
		rs58905411	G	A	-0.0176391	0.00212185	69.11	9.9e-17	0.0003	0.0021	0.8835	TRUE
		rs59979824	C	A	0.0130534	0.00220135	35.16	3.5e-09	-0.0006	0.0023	0.8027	TRUE
		rs6030200	G	A	-0.0130972	0.00225312	33.79	5.3e-09	0.003	0.0021	0.1613	TRUE
		rs60815182	A	G	0.0170549	0.00281483	36.71	1.5e-09	0.0015	0.0028	0.5893	TRUE
		rs61873510	G	T	0.0132923	0.00227806	34.05	3.6e-09	-0.0011	0.0025	0.6668	TRUE
		rs62305780	C	G	-0.0351743	0.00348387	101.94	3.3e-24	-0.0052	0.0033	0.1179	TRUE
		rs62339673	C	A	0.0117197	0.00217186	29.12	3.7e-08	-0.0002	0.0021	0.9231	TRUE
		rs62466318	C	T	-0.0191458	0.00259693	54.35	3e-13	-0.0014	0.0026	0.5775	TRUE
		rs6567160	T	C	0.016318	0.00246829	43.71	2.1e-11	-0.0067	0.0023	0.003694	TRUE
		rs6887940	G	A	-0.0135386	0.00209305	41.84	7.7e-11	-0.0019	0.0021	0.3503	TRUE
		rs72806111	A	G	-0.0136844	0.00246467	30.83	3.8e-08	-0.0035	0.0023	0.1239	TRUE
		rs7460106	T	C	-0.0136271	0.00249478	29.84	4.9e-08	0.0005	0.0027	0.8591	TRUE
		rs7514579	A	C	0.0141805	0.00247542	32.82	5e-09	0.0013	0.0024	0.5818	TRUE
		rs7586023	C	G	-0.0145694	0.00223511	42.49	5.3e-11	-0.0006	0.0022	0.7872	TRUE
		rs7630012	A	G	0.0121156	0.00210034	33.27	9.6e-09	-0.0042	0.002	0.03655	TRUE
		rs780094	T	C	-0.0361306	0.00214042	284.94	6.7e-64	-0.0019	0.002	0.3527	TRUE
		rs780569	T	A	0.0142432	0.00231521	37.85	1.2e-09	0.0017	0.0023	0.4497	TRUE
		rs7948028	A	C	0.0116155	0.00215657	29.01	4.1e-08	0.0026	0.0021	0.2147	TRUE
		rs8043563	G	C	0.0161098	0.00238964	45.45	1.6e-11	0.0006	0.0024	0.8157	TRUE
		rs838145	G	A	0.0167516	0.00211101	62.97	1.3e-15	0.0027	0.0021	0.2028	TRUE
		rs891389	C	T	0.0180764	0.00219462	67.84	4.3e-16	0.0021	0.0022	0.3338	TRUE
		rs9349379	A	G	-0.0131704	0.00212349	38.47	7.6e-10	0.0002	0.0021	0.9367	TRUE
		rs9372625	G	A	-0.0174688	0.00215312	65.82	4.6e-16	-0.0017	0.0021	0.4073	TRUE
		rs9615905	C	T	0.0114257	0.00209368	29.78	3.8e-08	-0.0004	0.002	0.8327	TRUE
		rs9646538	G	T	-0.0124481	0.00216639	33.02	5.4e-09	0.0013	0.002	0.513	TRUE
		rs9842406	T	G	-0.0139203	0.0021065	43.67	2.6e-11	-0.0051	0.002	0.01059	TRUE
		rs9866322	T	C	-0.016732	0.00250702	44.54	3.8e-11	-0.0029	0.0024	0.2386	TRUE
alcohol_overallfreq	THICK_postcentral	rs1004787	G	A	-0.0160002	0.00209645	58.25	1.4e-14	-0.0006	0.0008	0.433	TRUE
		rs10188314	C	T	-0.0117657	0.00208842	31.74	1.8e-08	-0.0016	0.0008	0.04787	TRUE
		rs10752651	C	T	0.0119533	0.00210239	32.33	1.4e-08	0.0008	0.0008	0.3358	TRUE
		rs1104608	G	C	0.0120939	0.0021271	32.33	1.5e-08	-0.0001	0.0009	0.9085	FALSE
		rs111633004	G	A	0.0164402	0.00280881	34.26	3.9e-09	0	0.0011	0.9784	TRUE
		rs11223617	G	A	0.0179378	0.00258503	48.15	3e-12	0.0005	0.0009	0.6105	TRUE
		rs113441031	C	T	0.0189582	0.00278664	46.28	1e-11	0.0012	0.0011	0.2673	TRUE
		rs113784412	C	T	0.0120679	0.00225529	28.63	4.7e-08	-0.0003	0.0009	0.7027	TRUE
		rs11640905	C	T	0.0136055	0.00236631	33.06	8.4e-09	0.0001	0.0009	0.8688	TRUE
		rs117799466	G	C	-0.0135119	0.00228461	34.98	2.5e-09	0.0006	0.0012	0.6315	TRUE
		rs11787216	C	T	0.0165099	0.00220283	56.17	6.1e-14	0.0009	0.0008	0.2905	TRUE
		rs118188698	T	C	-0.0282162	0.00467962	36.36	3.2e-09	-0.001	0.0017	0.581	TRUE
		rs11940694	A	G	-0.032249	0.00215124	224.73	5.5e-51	-0.0004	0.0008	0.5857	TRUE
		rs1228589	G	A	0.0136362	0.00242876	31.52	2.1e-08	0	0.0009	0.9977	TRUE
		rs1229984	T	C	-0.191657	0.00672086	813.2	1.1e-179	-0.001	0.0022	0.6369	TRUE
		rs12945575	C	T	0.0132978	0.00241716	30.27	4.5e-08	0.0013	0.001	0.1874	TRUE
		rs13102973	T	C	-0.0119604	0.00214896	30.98	2.9e-08	-0.0002	0.0008	0.8116	TRUE
		rs13135092	A	G	0.0343879	0.00379233	82.22	1.6e-19	0.0028	0.0016	0.08372	TRUE
		rs1377491	A	T	-0.0146666	0.00257201	32.52	1.5e-08	0	0.001	0.9966	TRUE
		rs1421085	T	C	0.0158428	0.00212442	55.61	8.3e-14	-0.0008	0.0008	0.3067	TRUE
		rs149971103	A	G	-0.0461066	0.00823543	31.34	2e-08	0.0059	0.0031	0.0615	TRUE
		rs1592732	C	G	-0.0160796	0.00286552	31.49	2.9e-08	0.0018	0.0011	0.1106	TRUE
		rs17690703	C	T	0.0178617	0.00236181	57.19	3.4e-14	0.0022	0.0012	0.06653	TRUE
		rs17698314	C	A	-0.0135938	0.00242682	31.38	1.5e-08	-0.001	0.0009	0.2649	TRUE
		rs1788030	C	T	0.0141903	0.00210996	45.23	3.9e-11	0.0017	0.0008	0.0296	TRUE
		rs2009367	T	G	0.0126918	0.00227541	31.11	2.2e-08	0.0003	0.0009	0.7233	TRUE
		rs2042073	A	G	-0.0122698	0.00213043	33.17	1.2e-08	-0.0001	0.0008	0.9396	TRUE
		rs2181328	A	G	-0.0148719	0.00232633	40.87	1.7e-10	-0.001	0.0009	0.2503	TRUE
		rs2237021	T	C	-0.0120319	0.00208578	33.28	4.1e-09	-0.0003	0.0008	0.7189	TRUE
		rs2244598	T	C	-0.0125451	0.00214683	34.15	3.5e-09	0.0001	0.0009	0.8965	TRUE
		rs2411453	T	G	-0.0229342	0.00212762	116.19	4.3e-27	-0.0013	0.001	0.2314	TRUE
		rs2533196	G	A	-0.012464	0.00212227	34.49	3.1e-09	-0.0002	0.0011	0.8482	TRUE
		rs2717063	C	A	-0.0127328	0.00212267	35.98	1.4e-09	-0.0005	0.0008	0.5707	TRUE
		rs2799056	A	G	-0.0129707	0.00213975	36.75	8.4e-10	0.0012	0.001	0.2015	TRUE
		rs2858088	A	G	-0.0138429	0.00214813	41.53	1.6e-10	-0.001	0.0008	0.2415	TRUE
		rs28741121	G	A	-0.0164216	0.00279583	34.5	5.6e-09	-0.0009	0.0014	0.5093	TRUE
		rs33705	T	C	0.0146318	0.00218	45.05	2e-11	0.0009	0.0008	0.2751	TRUE
		rs34473884	G	A	-0.0135071	0.00241042	31.4	3.1e-08	-0.0018	0.001	0.05707	TRUE
		rs35105141	C	T	0.0176807	0.00212643	69.13	1.3e-16	-0.0018	0.0008	0.0244	TRUE
		rs4135294	G	A	-0.0161401	0.00296311	29.67	4.6e-08	-0.0004	0.0011	0.7183	TRUE
		rs4241258	C	T	0.0173541	0.00303033	32.8	1.2e-08	0.0022	0.0012	0.05919	TRUE
		rs4726481	G	T	0.0142611	0.00213608	44.57	2.1e-11	0	0.0009	0.9889	TRUE
		rs4739105	T	C	-0.015147	0.00257732	34.54	3.9e-09	0.0002	0.001	0.8102	TRUE
		rs489062	G	A	0.0117857	0.00210267	31.42	1.8e-08	0.0002	0.0008	0.7633	TRUE
		rs56403963	C	G	-0.0167354	0.00277526	36.36	6.2e-09	0.0024	0.001	0.01696	TRUE
		rs58905411	G	A	-0.0176391	0.00212185	69.11	9.9e-17	-0.0027	0.0008	0.001043	TRUE
		rs59979824	C	A	0.0130534	0.00220135	35.16	3.5e-09	-0.0002	0.0009	0.8465	TRUE
		rs6030200	G	A	-0.0130972	0.00225312	33.79	5.3e-09	-0.0001	0.0008	0.8937	TRUE
		rs60815182	A	G	0.0170549	0.00281483	36.71	1.5e-09	-0.0003	0.0011	0.7588	TRUE
		rs61873510	G	T	0.0132923	0.00227806	34.05	3.6e-09	0.0005	0.001	0.6283	TRUE
		rs62305780	C	G	-0.0351743	0.00348387	101.94	3.3e-24	-0.001	0.0013	0.4425	TRUE
		rs62339673	C	A	0.0117197	0.00217186	29.12	3.7e-08	-0.0012	0.0008	0.1378	TRUE
		rs62466318	C	T	-0.0191458	0.00259693	54.35	3e-13	-0.0014	0.001	0.1519	TRUE
		rs6567160	T	C	0.016318	0.00246829	43.71	2.1e-11	0.0004	0.0009	0.6696	TRUE
		rs6887940	G	A	-0.0135386	0.00209305	41.84	7.7e-11	-0.0009	0.0008	0.2489	TRUE
		rs72806111	A	G	-0.0136844	0.00246467	30.83	3.8e-08	-0.0005	0.0009	0.611	TRUE
		rs7460106	T	C	-0.0136271	0.00249478	29.84	4.9e-08	-0.0004	0.0011	0.7228	TRUE
		rs7514579	A	C	0.0141805	0.00247542	32.82	5e-09	-0.0001	0.001	0.9448	TRUE
		rs7586023	C	G	-0.0145694	0.00223511	42.49	5.3e-11	-0.0006	0.0008	0.4803	TRUE
		rs7630012	A	G	0.0121156	0.00210034	33.27	9.6e-09	0.0003	0.0008	0.7479	TRUE
		rs780094	T	C	-0.0361306	0.00214042	284.94	6.7e-64	0.0002	0.0008	0.7826	TRUE
		rs780569	T	A	0.0142432	0.00231521	37.85	1.2e-09	-0.0007	0.0009	0.434	TRUE
		rs7948028	A	C	0.0116155	0.00215657	29.01	4.1e-08	0.0003	0.0008	0.7089	TRUE
		rs8043563	G	C	0.0161098	0.00238964	45.45	1.6e-11	-0.0006	0.0009	0.5192	TRUE
		rs838145	G	A	0.0167516	0.00211101	62.97	1.3e-15	0.0008	0.0008	0.3378	TRUE
		rs891389	C	T	0.0180764	0.00219462	67.84	4.3e-16	0.0005	0.0008	0.5267	TRUE
		rs9349379	A	G	-0.0131704	0.00212349	38.47	7.6e-10	-0.001	0.0008	0.2094	TRUE
		rs9372625	G	A	-0.0174688	0.00215312	65.82	4.6e-16	0.0002	0.0008	0.7967	TRUE
		rs9615905	C	T	0.0114257	0.00209368	29.78	3.8e-08	0.0031	0.0008	0.0001241	TRUE
		rs9646538	G	T	-0.0124481	0.00216639	33.02	5.4e-09	0.0008	0.0008	0.2983	TRUE
		rs9842406	T	G	-0.0139203	0.0021065	43.67	2.6e-11	-0.0017	0.0008	0.03026	TRUE
		rs9866322	T	C	-0.016732	0.00250702	44.54	3.8e-11	0.0009	0.001	0.353	TRUE
anyalcohol_glassespermonth	SA_caudalmiddlefrontal	rs1004787	G	A	-0.0186852	0.0021064	78.69	9.5e-19	3.4859	2.4179	0.1494	TRUE
		rs1022528	G	A	-0.0129013	0.00221694	33.87	3.3e-09	0.3549	2.4874	0.8865	TRUE
		rs1056010	T	C	-0.0140353	0.00213	43.42	2.9e-11	-2.8544	2.4891	0.2515	TRUE
		rs1104608	G	C	0.012956	0.00213721	36.75	2.1e-09	6.5398	2.6768	0.01456	FALSE
		rs11125160	G	A	-0.0123263	0.00223778	30.34	3.5e-08	0.3315	2.5719	0.8975	TRUE
		rs11223617	G	A	0.0182231	0.00259686	49.24	1.4e-12	0.4324	2.886	0.8809	TRUE
		rs113441031	C	T	0.018031	0.00279982	41.47	1.2e-10	1.361	3.365	0.6859	TRUE
		rs117782187	C	T	-0.0302026	0.00522437	33.42	1.5e-08	1.3539	6.6135	0.8378	TRUE
		rs11787216	C	T	0.0144554	0.00221302	42.67	7.4e-11	-2.7425	2.5768	0.2872	TRUE
		rs118188698	T	C	-0.0300974	0.00470026	41	2.2e-10	-7.2811	5.2387	0.1646	TRUE
		rs11864886	A	G	-0.0175254	0.00250815	48.82	2.5e-12	2.5343	2.8172	0.3683	TRUE
		rs11940694	A	G	-0.0357367	0.00216082	273.52	6.5e-62	-7.0461	2.4275	0.0037	TRUE
		rs12030672	C	A	-0.013101	0.00243355	28.98	4.9e-08	0.58	3.1757	0.8551	TRUE
		rs12184585	A	G	-0.0128822	0.00233809	30.36	3.8e-08	0.5489	2.6478	0.8358	TRUE
		rs1229984	T	C	-0.226432	0.00675127	1124.88	1e-200	-16.0909	6.7119	0.01651	TRUE
		rs12521723	A	T	0.0156981	0.00284386	30.47	3.7e-08	6.8354	3.4452	0.04725	TRUE
		rs12593149	G	A	-0.0123029	0.00212309	33.58	1.2e-08	-1.3273	2.3986	0.58	TRUE
		rs1260326	T	C	-0.0361951	0.00213917	286.29	2.6e-64	1.1482	2.4477	0.639	TRUE
		rs13024996	C	A	0.0141822	0.00216545	42.89	6.2e-11	1.7067	2.4815	0.4916	TRUE
		rs13135092	A	G	0.0428616	0.00380913	126.62	3.3e-29	9.0068	4.8925	0.06563	TRUE
		rs1397132	T	C	0.0115209	0.0021236	29.43	3.7e-08	-3.0999	2.4612	0.2079	TRUE
		rs149971103	A	G	-0.0519513	0.00826998	39.46	3.3e-10	4.1	9.5196	0.6667	TRUE
		rs17177078	C	T	0.0273857	0.0045533	36.17	2.3e-09	5.1502	4.905	0.2937	TRUE
		rs17601612	G	C	0.0147984	0.00217305	46.38	8e-12	0.9617	2.5044	0.701	TRUE
		rs1788030	C	T	0.0150956	0.00211953	50.72	1.5e-12	7.6361	2.4333	0.001701	TRUE
		rs1788820	A	G	-0.0158619	0.00220034	51.97	7.5e-13	-7.1462	2.5491	0.005056	TRUE
		rs1937522	A	G	0.0147987	0.00209724	49.79	9.7e-13	3.1698	2.3884	0.1845	TRUE
		rs194868	T	C	-0.0140053	0.00209872	44.53	2.3e-11	-4.9353	2.3844	0.03847	TRUE
		rs2079227	G	A	-0.0119639	0.00210241	32.38	9.1e-09	-4.4209	2.3742	0.06259	TRUE
		rs2274793	C	T	0.0135923	0.00223765	36.9	1.5e-09	-3.5874	2.5784	0.1641	TRUE
		rs2525570	A	G	-0.0119675	0.00214047	31.26	1.6e-08	4.1713	2.5236	0.09835	TRUE
		rs2533196	G	A	-0.0137467	0.00213214	41.57	8.3e-11	1.5737	3.645	0.6659	TRUE
		rs2717063	C	A	-0.014175	0.0021326	44.18	2.5e-11	-1.0147	2.437	0.6771	TRUE
		rs2858088	A	G	-0.0147637	0.00215765	46.82	1e-11	1.2987	2.5395	0.6091	TRUE
		rs28601761	C	G	-0.0119457	0.00214616	30.98	4.2e-08	-2.9312	2.4333	0.2283	FALSE
		rs28929474	C	T	0.0473655	0.00749827	39.9	1.7e-10	-15.6585	9.0879	0.08489	TRUE
		rs2959005	C	T	-0.0135182	0.00222743	36.83	1e-09	-6.1246	2.4959	0.01413	TRUE
		rs322776	T	G	-0.0116123	0.00212868	29.76	4.4e-08	0.088	2.4238	0.971	TRUE
		rs324012	C	T	-0.0122505	0.00210679	33.81	4.6e-09	2.1395	2.5002	0.3922	TRUE
		rs34060476	A	G	-0.0207444	0.0030797	45.37	3.2e-11	7.0922	3.767	0.05974	TRUE
		rs35572189	G	A	-0.0135756	0.00218515	38.6	3.6e-10	0.2545	3.8346	0.9471	TRUE
		rs4284578	T	C	0.0123591	0.00217307	32.35	1.6e-08	1.8399	2.4671	0.4558	TRUE
		rs4480324	A	G	0.0157159	0.0023215	45.83	2.3e-11	-5.1431	2.6628	0.05343	TRUE
		rs4726481	G	T	0.0131318	0.00214603	37.44	7.8e-10	3.1292	2.6947	0.2456	TRUE
		rs4733067	A	G	-0.0118284	0.00213216	30.78	3.4e-08	1.6814	2.4227	0.4877	TRUE
		rs4815364	G	A	-0.0123534	0.00215168	32.96	6.7e-09	-0.8664	2.5117	0.7301	TRUE
		rs4844947	G	C	0.0125219	0.00213714	34.33	2.4e-09	3.6074	2.4013	0.133	TRUE
		rs4916723	A	C	0.0151795	0.00214409	50.12	2.4e-12	0.3737	2.4499	0.8788	TRUE
		rs55932213	A	G	-0.0141131	0.00244914	33.21	1.1e-08	0.8633	2.8672	0.7633	TRUE
		rs56030824	G	A	0.018133	0.00224118	65.46	3.1e-16	2.5473	2.5577	0.3193	TRUE
		rs56094641	A	G	0.0137086	0.00213389	41.27	9.4e-11	-1.4137	2.4228	0.5596	TRUE
		rs6136465	G	A	0.0123024	0.00214798	32.8	9.8e-09	-2.7573	2.4831	0.2668	TRUE
		rs61873510	G	T	0.0157739	0.00228859	47.51	3.4e-12	6.1829	2.955	0.03641	TRUE
		rs62136829	C	T	0.0327803	0.00484993	45.68	1.5e-11	3.0552	5.9169	0.6056	TRUE
		rs62244890	T	C	-0.0127447	0.00212647	35.92	1.7e-09	-0.7557	2.4649	0.7592	TRUE
		rs62305780	C	G	-0.0347147	0.00349911	98.43	6.1e-23	8.448	3.946	0.03228	TRUE
		rs62442924	C	T	-0.0177486	0.00265901	44.55	4.9e-11	-2.4652	2.999	0.4111	TRUE
		rs62477431	C	G	0.0146334	0.00256569	32.53	1.5e-08	0.9097	2.9566	0.7583	TRUE
		rs6759325	C	G	-0.0159196	0.00287565	30.65	3.3e-08	3.9712	3.4018	0.243	TRUE
		rs6810396	C	G	-0.01507	0.00264301	32.51	1.7e-08	-5.8263	3.1226	0.06206	TRUE
		rs6937318	T	C	0.0118074	0.00209629	31.73	3.7e-08	-1.6378	2.4683	0.507	TRUE
		rs72890684	C	A	0.0287204	0.00522273	30.24	3.2e-08	-8.8867	6.5882	0.1774	TRUE
		rs74424378	T	G	0.0144413	0.00246528	34.31	3.2e-09	1.1248	2.8078	0.6887	TRUE
		rs75746223	C	T	0.0412545	0.00707036	34.05	3.8e-09	-10.4936	6.9434	0.1307	TRUE
		rs7630012	A	G	0.0126553	0.00211018	35.97	2.8e-09	1.2965	2.4106	0.5907	TRUE
		rs77123275	C	T	-0.0286258	0.00476891	36.03	1.3e-09	0.0107	6.0671	0.9986	TRUE
		rs828867	G	A	-0.0134357	0.00213698	39.53	2.8e-10	3.1031	2.5592	0.2253	TRUE
		rs838145	G	A	0.0151525	0.00212061	51.06	9.8e-13	-2.9404	2.5456	0.2481	TRUE
		rs911475	C	T	0.0157555	0.00283543	30.88	2.8e-08	4.8047	3.2916	0.1444	TRUE
		rs928736	C	T	0.0141619	0.00229384	38.12	4.2e-10	-0.2955	2.7228	0.9136	TRUE
		rs9349379	A	G	-0.0144514	0.0021332	45.89	1.1e-11	4.7976	2.525	0.05743	TRUE
		rs9597846	A	G	0.0164042	0.00283304	33.53	5.8e-09	6.0557	3.3528	0.07089	TRUE
		rs9607812	G	A	0.0154943	0.00270017	32.93	7.4e-09	0.4849	3.1089	0.8761	TRUE
		rs9866322	T	C	-0.0206574	0.00251885	67.26	2.6e-16	-0.3444	2.8991	0.9054	TRUE
anyalcohol_glassespermonth	THICK_frontalpole_thickavg1_m5e3	rs1004787	G	A	-0.0186852	0.0021064	78.69	9.5e-19	0.3567	0.2779	0.1993	TRUE
		rs1022528	G	A	-0.0129013	0.00221694	33.87	3.3e-09	0.1184	0.2869	0.6797	TRUE
		rs1056010	T	C	-0.0140353	0.00213	43.42	2.9e-11	0.1004	0.2858	0.7254	TRUE
		rs1104608	G	C	0.012956	0.00213721	36.75	2.1e-09	0.4021	0.3086	0.1926	FALSE
		rs11125160	G	A	-0.0123263	0.00223778	30.34	3.5e-08	0.1357	0.296	0.6466	TRUE
		rs11223617	G	A	0.0182231	0.00259686	49.24	1.4e-12	0.1001	0.3335	0.7641	TRUE
		rs113441031	C	T	0.018031	0.00279982	41.47	1.2e-10	-0.2632	0.3884	0.4979	TRUE
		rs117782187	C	T	-0.0302026	0.00522437	33.42	1.5e-08	0.6865	0.77	0.3726	TRUE
		rs11787216	C	T	0.0144554	0.00221302	42.67	7.4e-11	0.2673	0.2969	0.3679	TRUE
		rs118188698	T	C	-0.0300974	0.00470026	41	2.2e-10	-0.3136	0.6047	0.604	TRUE
		rs11864886	A	G	-0.0175254	0.00250815	48.82	2.5e-12	0.27	0.3246	0.4055	TRUE
		rs11940694	A	G	-0.0357367	0.00216082	273.52	6.5e-62	-0.0334	0.2796	0.9049	TRUE
		rs12030672	C	A	-0.013101	0.00243355	28.98	4.9e-08	0.4648	0.3675	0.206	TRUE
		rs12184585	A	G	-0.0128822	0.00233809	30.36	3.8e-08	0.1397	0.3051	0.6471	TRUE
		rs1229984	T	C	-0.226432	0.00675127	1124.88	1e-200	-0.2134	0.7674	0.7809	TRUE
		rs12521723	A	T	0.0156981	0.00284386	30.47	3.7e-08	0.492	0.3966	0.2147	TRUE
		rs12593149	G	A	-0.0123029	0.00212309	33.58	1.2e-08	0.1259	0.2765	0.6488	TRUE
		rs1260326	T	C	-0.0361951	0.00213917	286.29	2.6e-64	0.0576	0.2823	0.8382	TRUE
		rs13024996	C	A	0.0141822	0.00216545	42.89	6.2e-11	-0.1667	0.2856	0.5595	TRUE
		rs13135092	A	G	0.0428616	0.00380913	126.62	3.3e-29	1.846	0.5655	0.001098	TRUE
		rs1397132	T	C	0.0115209	0.0021236	29.43	3.7e-08	0.1449	0.2838	0.6096	TRUE
		rs149971103	A	G	-0.0519513	0.00826998	39.46	3.3e-10	-1.4237	1.1067	0.1983	TRUE
		rs17177078	C	T	0.0273857	0.0045533	36.17	2.3e-09	0.2639	0.5691	0.6428	TRUE
		rs17601612	G	C	0.0147984	0.00217305	46.38	8e-12	-0.055	0.2878	0.8486	TRUE
		rs1788030	C	T	0.0150956	0.00211953	50.72	1.5e-12	-0.181	0.2799	0.518	TRUE
		rs1788820	A	G	-0.0158619	0.00220034	51.97	7.5e-13	-0.241	0.2947	0.4135	TRUE
		rs1937522	A	G	0.0147987	0.00209724	49.79	9.7e-13	0.0128	0.275	0.963	TRUE
		rs194868	T	C	-0.0140053	0.00209872	44.53	2.3e-11	-0.4316	0.2743	0.1156	TRUE
		rs2079227	G	A	-0.0119639	0.00210241	32.38	9.1e-09	0.3046	0.2736	0.2656	TRUE
		rs2274793	C	T	0.0135923	0.00223765	36.9	1.5e-09	-0.4073	0.2977	0.1713	TRUE
		rs2525570	A	G	-0.0119675	0.00214047	31.26	1.6e-08	-0.2389	0.2901	0.4102	TRUE
		rs2533196	G	A	-0.0137467	0.00213214	41.57	8.3e-11	0.8134	0.4185	0.05192	TRUE
		rs2717063	C	A	-0.014175	0.0021326	44.18	2.5e-11	-0.0991	0.2807	0.724	TRUE
		rs2858088	A	G	-0.0147637	0.00215765	46.82	1e-11	-0.2657	0.2933	0.365	TRUE
		rs28601761	C	G	-0.0119457	0.00214616	30.98	4.2e-08	0.391	0.2809	0.164	FALSE
		rs28929474	C	T	0.0473655	0.00749827	39.9	1.7e-10	0.8603	1.0504	0.4128	TRUE
		rs2959005	C	T	-0.0135182	0.00222743	36.83	1e-09	-0.3612	0.2876	0.2091	TRUE
		rs322776	T	G	-0.0116123	0.00212868	29.76	4.4e-08	0.1773	0.279	0.5251	TRUE
		rs324012	C	T	-0.0122505	0.00210679	33.81	4.6e-09	0.2049	0.2866	0.4746	TRUE
		rs34060476	A	G	-0.0207444	0.0030797	45.37	3.2e-11	-0.1353	0.4344	0.7554	TRUE
		rs35572189	G	A	-0.0135756	0.00218515	38.6	3.6e-10	-0.0434	0.4355	0.9207	TRUE
		rs4284578	T	C	0.0123591	0.00217307	32.35	1.6e-08	0.3761	0.2843	0.1858	TRUE
		rs4480324	A	G	0.0157159	0.0023215	45.83	2.3e-11	0.1894	0.3065	0.5366	TRUE
		rs4726481	G	T	0.0131318	0.00214603	37.44	7.8e-10	-0.2784	0.3101	0.3694	TRUE
		rs4733067	A	G	-0.0118284	0.00213216	30.78	3.4e-08	-0.1524	0.2789	0.5847	TRUE
		rs4815364	G	A	-0.0123534	0.00215168	32.96	6.7e-09	0.3722	0.289	0.1978	TRUE
		rs4844947	G	C	0.0125219	0.00213714	34.33	2.4e-09	-0.0896	0.2764	0.7457	TRUE
		rs4916723	A	C	0.0151795	0.00214409	50.12	2.4e-12	-0.0353	0.282	0.9004	TRUE
		rs55932213	A	G	-0.0141131	0.00244914	33.21	1.1e-08	-0.2635	0.3287	0.4227	TRUE
		rs56030824	G	A	0.018133	0.00224118	65.46	3.1e-16	0.1246	0.2946	0.6723	TRUE
		rs56094641	A	G	0.0137086	0.00213389	41.27	9.4e-11	-0.3189	0.279	0.253	TRUE
		rs6136465	G	A	0.0123024	0.00214798	32.8	9.8e-09	-0.0126	0.2865	0.9648	TRUE
		rs61873510	G	T	0.0157739	0.00228859	47.51	3.4e-12	0.3338	0.3397	0.3258	TRUE
		rs62136829	C	T	0.0327803	0.00484993	45.68	1.5e-11	-0.4557	0.688	0.5078	TRUE
		rs62244890	T	C	-0.0127447	0.00212647	35.92	1.7e-09	0.3654	0.2838	0.1978	TRUE
		rs62305780	C	G	-0.0347147	0.00349911	98.43	6.1e-23	-0.8609	0.4565	0.05933	TRUE
		rs62442924	C	T	-0.0177486	0.00265901	44.55	4.9e-11	0.0567	0.3453	0.8696	TRUE
		rs62477431	C	G	0.0146334	0.00256569	32.53	1.5e-08	-0.3804	0.3414	0.2651	TRUE
		rs6759325	C	G	-0.0159196	0.00287565	30.65	3.3e-08	-0.0422	0.3893	0.9137	TRUE
		rs6810396	C	G	-0.01507	0.00264301	32.51	1.7e-08	-0.6787	0.3612	0.06024	TRUE
		rs6937318	T	C	0.0118074	0.00209629	31.73	3.7e-08	0.3675	0.2847	0.1967	TRUE
		rs72890684	C	A	0.0287204	0.00522273	30.24	3.2e-08	0.2433	0.764	0.7501	TRUE
		rs74424378	T	G	0.0144413	0.00246528	34.31	3.2e-09	-0.5192	0.3231	0.108	TRUE
		rs75746223	C	T	0.0412545	0.00707036	34.05	3.8e-09	0.1198	0.8041	0.8816	TRUE
		rs7630012	A	G	0.0126553	0.00211018	35.97	2.8e-09	0.0116	0.2776	0.9668	TRUE
		rs77123275	C	T	-0.0286258	0.00476891	36.03	1.3e-09	0.2595	0.699	0.7105	TRUE
		rs828867	G	A	-0.0134357	0.00213698	39.53	2.8e-10	-0.0876	0.2961	0.7674	TRUE
		rs838145	G	A	0.0151525	0.00212061	51.06	9.8e-13	0.1492	0.2928	0.6102	TRUE
		rs911475	C	T	0.0157555	0.00283543	30.88	2.8e-08	0.3752	0.3789	0.3222	TRUE
		rs928736	C	T	0.0141619	0.00229384	38.12	4.2e-10	-0.2166	0.3143	0.4907	TRUE
		rs9349379	A	G	-0.0144514	0.0021332	45.89	1.1e-11	-0.0488	0.2914	0.8669	TRUE
		rs9597846	A	G	0.0164042	0.00283304	33.53	5.8e-09	0.1957	0.3868	0.6128	TRUE
		rs9607812	G	A	0.0154943	0.00270017	32.93	7.4e-09	0.4138	0.3584	0.2483	TRUE
		rs9866322	T	C	-0.0206574	0.00251885	67.26	2.6e-16	-0.1294	0.3339	0.6984	TRUE
beef_overallfreq	THICK_medialorbitofrontal_thickavg1_m5e3	rs10122339	G	T	-0.0163542	0.00210578	60.32	8.8e-15	-0.0018	0.0012	0.1338	TRUE
		rs10789340	A	G	0.0164376	0.0021759	57.07	3.4e-14	0.0001	0.0013	0.9658	TRUE
		rs11165829	C	G	0.0121371	0.00218544	30.84	3.2e-08	-0.0001	0.0013	0.9367	TRUE
		rs11240430	G	C	0.0138942	0.00233513	35.4	2.9e-09	0.0023	0.0013	0.08377	TRUE
		rs1191468	G	A	0.0155846	0.00280281	30.92	2.5e-08	0.0012	0.0017	0.4887	TRUE
		rs13146141	G	A	0.0122683	0.00221214	30.76	3.2e-08	-0.0015	0.0013	0.2417	TRUE
		rs139552257	C	T	0.052097	0.00927923	31.52	2.4e-08	0.0082	0.0053	0.1212	TRUE
		rs1421085	T	C	0.0161168	0.00214269	56.58	4.7e-14	-0.0002	0.0012	0.8554	TRUE
		rs1556147	A	T	-0.0128745	0.00223914	33.06	1.1e-08	-0.0012	0.0013	0.3598	TRUE
		rs28758902	C	T	0.0118138	0.00212776	30.83	3e-08	-0.0012	0.0012	0.3229	TRUE
		rs429358	T	C	0.0172368	0.00290878	35.11	4.2e-09	0.0012	0.0017	0.4862	TRUE
		rs4676964	C	T	-0.015288	0.00211962	52.02	5.7e-13	-0.0003	0.0013	0.8375	TRUE
		rs62396185	G	C	0.017431	0.00240399	52.58	4.9e-13	0.0007	0.0014	0.6326	TRUE
		rs9611611	C	T	0.0151915	0.0026584	32.66	9.9e-09	0.0021	0.0015	0.1697	TRUE
cereal_bowlsperweek	SA_medialorbitofrontal	rs10109061	A	G	-0.0131311	0.00213651	37.77	5.2e-10	-1.6649	1.3513	0.2179	TRUE
		rs10838574	A	G	-0.0132873	0.00219067	36.79	1.8e-09	0.3618	1.3082	0.7821	TRUE
		rs10899488	A	G	0.0178092	0.00284281	39.25	3.9e-10	-1.673	1.6839	0.3204	TRUE
		rs1104608	G	C	-0.0126191	0.0021403	34.76	4.8e-09	-0.193	1.416	0.8916	FALSE
		rs11097340	C	T	0.0129873	0.00213759	36.91	9.6e-10	-0.3799	1.2784	0.7664	TRUE
		rs112780312	G	A	0.0129699	0.00237709	29.77	4.9e-08	-2.8201	1.4565	0.05284	TRUE
		rs11660658	T	C	-0.0161364	0.00230382	49.06	2.9e-12	1.7798	1.3749	0.1955	TRUE
		rs11940694	A	G	0.0144664	0.00216504	44.65	1.9e-11	-1.9863	1.2826	0.1215	TRUE
		rs12318581	G	C	-0.0134463	0.00238203	31.86	1.5e-08	1.6741	1.4277	0.241	TRUE
		rs12713415	G	C	0.0151635	0.00231702	42.83	5.4e-11	-1.8857	1.4291	0.187	TRUE
		rs12980791	C	T	-0.0242575	0.00333945	52.76	3.5e-13	-0.1501	2.0001	0.9402	TRUE
		rs13030994	G	A	0.0123304	0.00209734	34.56	4.2e-09	-1.3729	1.2666	0.2784	TRUE
		rs13082065	C	T	-0.013808	0.00213111	41.98	4.8e-11	-0.5169	1.2842	0.6873	TRUE
		rs13234131	A	G	-0.0203859	0.00313167	42.37	7.6e-11	2.7003	2.0174	0.1807	TRUE
		rs1463825	A	G	-0.0123378	0.00211866	33.91	6.3e-09	1.7429	1.2921	0.1774	TRUE
		rs184643	G	A	0.0145573	0.00212241	47.04	9.9e-12	-0.1726	1.3025	0.8946	TRUE
		rs1965342	T	A	0.0135055	0.00211304	40.85	1.2e-10	-0.8796	1.2687	0.4881	FALSE
		rs2236950	C	A	-0.0161949	0.00277357	34.09	4.9e-09	1.7439	1.674	0.2975	TRUE
		rs2455028	G	A	-0.0216686	0.00376217	33.17	6.3e-09	-0.9098	2.2443	0.6852	TRUE
		rs2472297	C	T	0.0205172	0.00238016	74.31	6.8e-18	-2.16	1.5035	0.1508	TRUE
		rs2582404	C	T	-0.0138947	0.00241328	33.15	1e-08	-1.2163	1.4874	0.4135	TRUE
		rs2799849	C	T	0.0138431	0.00224331	38.08	7.1e-10	-0.9717	1.3665	0.4771	TRUE
		rs34811474	G	A	-0.0143303	0.00248617	33.22	7.2e-09	-5.261	2.4742	0.03348	TRUE
		rs4259241	C	T	0.0180966	0.00237008	58.3	2.6e-14	0.9875	1.4398	0.4928	TRUE
		rs4410790	T	C	0.0138279	0.00217721	40.34	2.9e-10	-2.1207	1.3077	0.1049	TRUE
		rs4420638	A	G	-0.0202928	0.00267652	57.48	3.9e-14	-0.6256	1.7636	0.7228	TRUE
		rs4531481	A	C	0.0141423	0.00252644	31.33	2.6e-08	-0.1797	1.5586	0.9082	TRUE
		rs4655962	C	T	-0.0118509	0.00217764	29.62	4.4e-08	-3.0233	1.3608	0.0263	TRUE
		rs4916715	G	A	-0.0209637	0.00315898	44.04	2.5e-11	1.8604	1.933	0.3358	TRUE
		rs491711	A	C	-0.0147885	0.00227568	42.23	7.8e-11	0.0902	1.3705	0.9475	TRUE
		rs56135413	T	C	-0.0143213	0.00259518	30.45	2.9e-08	-3.6673	1.562	0.01888	TRUE
		rs56305291	A	G	-0.0168652	0.00271977	38.45	3.5e-10	3.2426	1.5876	0.04111	TRUE
		rs57590313	C	A	-0.0151793	0.00273422	30.82	2.8e-08	-0.614	1.737	0.7237	TRUE
		rs62122430	A	T	-0.0167245	0.00298072	31.48	1.7e-08	2.3809	1.9965	0.233	TRUE
		rs6510177	T	C	0.0171567	0.00269176	40.63	2.1e-10	0.9589	2.0821	0.6451	TRUE
		rs6918737	T	A	-0.0160046	0.00248261	41.56	7.5e-11	-1.3888	1.4703	0.3449	TRUE
		rs7619139	T	A	0.0179228	0.00213596	70.41	5.4e-17	-1.3275	1.2957	0.3056	TRUE
		rs7621968	A	G	0.0128387	0.00219357	34.26	4.4e-09	-1.4115	1.313	0.2824	TRUE
		rs7868916	G	A	0.0145781	0.00257872	31.96	1.3e-08	-0.7831	1.5141	0.605	TRUE
		rs838133	A	G	0.0240289	0.0021731	122.27	9.4e-29	-3.1958	1.635	0.05062	TRUE
		rs9488822	A	T	0.0133445	0.00218657	37.25	8.9e-10	-2.4227	1.3527	0.07329	TRUE
		rs9846396	C	T	-0.0123976	0.00211911	34.23	5.7e-09	-0.2032	1.2645	0.8723	TRUE
		rs9959497	G	A	0.028065	0.0029038	93.41	6.3e-22	-3.3636	1.8124	0.06348	TRUE
		rs9987289	A	G	-0.0251362	0.00363836	47.73	4.3e-12	1.5144	2.2018	0.4916	TRUE
cereal_bowlsperweek	THICK_superiorparietal_thickavg1_m5e3	rs10109061	A	G	-0.0131311	0.00213651	37.77	5.2e-10	0	0.0007	0.9569	TRUE
		rs10838574	A	G	-0.0132873	0.00219067	36.79	1.8e-09	0.0005	0.0007	0.4729	TRUE
		rs10899488	A	G	0.0178092	0.00284281	39.25	3.9e-10	-0.0011	0.0009	0.2257	TRUE
		rs1104608	G	C	-0.0126191	0.0021403	34.76	4.8e-09	-0.0001	0.0008	0.9264	FALSE
		rs11097340	C	T	0.0129873	0.00213759	36.91	9.6e-10	-0.0011	0.0007	0.1329	TRUE
		rs112780312	G	A	0.0129699	0.00237709	29.77	4.9e-08	0	0.0008	0.9784	TRUE
		rs11660658	T	C	-0.0161364	0.00230382	49.06	2.9e-12	-0.0009	0.0008	0.2109	TRUE
		rs11940694	A	G	0.0144664	0.00216504	44.65	1.9e-11	0.0004	0.0007	0.5844	TRUE
		rs12318581	G	C	-0.0134463	0.00238203	31.86	1.5e-08	-0.0004	0.0008	0.6375	TRUE
		rs12713415	G	C	0.0151635	0.00231702	42.83	5.4e-11	-0.0002	0.0008	0.764	TRUE
		rs12980791	C	T	-0.0242575	0.00333945	52.76	3.5e-13	-0.0009	0.0011	0.3876	TRUE
		rs13030994	G	A	0.0123304	0.00209734	34.56	4.2e-09	0.0008	0.0007	0.2265	TRUE
		rs13082065	C	T	-0.013808	0.00213111	41.98	4.8e-11	-0.0002	0.0007	0.786	TRUE
		rs13234131	A	G	-0.0203859	0.00313167	42.37	7.6e-11	-0.0018	0.0011	0.1002	TRUE
		rs1463825	A	G	-0.0123378	0.00211866	33.91	6.3e-09	0	0.0007	0.978	TRUE
		rs184643	G	A	0.0145573	0.00212241	47.04	9.9e-12	0.0006	0.0007	0.384	TRUE
		rs1965342	T	A	0.0135055	0.00211304	40.85	1.2e-10	-0.0004	0.0007	0.5723	FALSE
		rs2236950	C	A	-0.0161949	0.00277357	34.09	4.9e-09	0.0003	0.0009	0.7505	TRUE
		rs2455028	G	A	-0.0216686	0.00376217	33.17	6.3e-09	0.0009	0.0012	0.4704	TRUE
		rs2472297	C	T	0.0205172	0.00238016	74.31	6.8e-18	-0.0002	0.0008	0.7821	TRUE
		rs2582404	C	T	-0.0138947	0.00241328	33.15	1e-08	0.0004	0.0008	0.6166	TRUE
		rs2799849	C	T	0.0138431	0.00224331	38.08	7.1e-10	0	0.0007	0.9802	TRUE
		rs34811474	G	A	-0.0143303	0.00248617	33.22	7.2e-09	-0.0009	0.0013	0.5052	TRUE
		rs4259241	C	T	0.0180966	0.00237008	58.3	2.6e-14	0.0004	0.0008	0.6456	TRUE
		rs4410790	T	C	0.0138279	0.00217721	40.34	2.9e-10	-0.0001	0.0007	0.9056	TRUE
		rs4420638	A	G	-0.0202928	0.00267652	57.48	3.9e-14	-0.0007	0.001	0.4807	TRUE
		rs4531481	A	C	0.0141423	0.00252644	31.33	2.6e-08	-0.0006	0.0009	0.5012	TRUE
		rs4655962	C	T	-0.0118509	0.00217764	29.62	4.4e-08	-0.001	0.0008	0.1889	TRUE
		rs4916715	G	A	-0.0209637	0.00315898	44.04	2.5e-11	-0.0002	0.0011	0.8348	TRUE
		rs491711	A	C	-0.0147885	0.00227568	42.23	7.8e-11	-0.0013	0.0008	0.09265	TRUE
		rs56135413	T	C	-0.0143213	0.00259518	30.45	2.9e-08	-0.0013	0.0009	0.1162	TRUE
		rs56305291	A	G	-0.0168652	0.00271977	38.45	3.5e-10	-0.0009	0.0009	0.2924	TRUE
		rs57590313	C	A	-0.0151793	0.00273422	30.82	2.8e-08	0.0003	0.001	0.7852	TRUE
		rs62122430	A	T	-0.0167245	0.00298072	31.48	1.7e-08	-0.0006	0.0011	0.5681	TRUE
		rs6510177	T	C	0.0171567	0.00269176	40.63	2.1e-10	0.0005	0.0012	0.6701	TRUE
		rs6918737	T	A	-0.0160046	0.00248261	41.56	7.5e-11	-0.0001	0.0008	0.8631	TRUE
		rs7619139	T	A	0.0179228	0.00213596	70.41	5.4e-17	-0.0005	0.0007	0.518	TRUE
		rs7621968	A	G	0.0128387	0.00219357	34.26	4.4e-09	0.0001	0.0007	0.8776	TRUE
		rs7868916	G	A	0.0145781	0.00257872	31.96	1.3e-08	0.0003	0.0008	0.762	TRUE
		rs838133	A	G	0.0240289	0.0021731	122.27	9.4e-29	0.0007	0.0009	0.4421	TRUE
		rs9488822	A	T	0.0133445	0.00218657	37.25	8.9e-10	0.0002	0.0007	0.7932	TRUE
		rs9846396	C	T	-0.0123976	0.00211911	34.23	5.7e-09	0.0001	0.0007	0.842	TRUE
		rs9959497	G	A	0.028065	0.0029038	93.41	6.3e-22	0.0008	0.001	0.4504	TRUE
		rs9987289	A	G	-0.0251362	0.00363836	47.73	4.3e-12	-0.0023	0.0012	0.06365	TRUE
cheese_overallfreq	SA_posteriorcingulate	rs10938397	A	G	0.013263	0.00212776	38.85	3.8e-10	-0.8824	1.0198	0.3869	TRUE
		rs11082575	C	G	-0.0126165	0.00216389	33.99	4.6e-09	-1.3538	1.0322	0.1897	TRUE
		rs112145286	T	C	0.0190722	0.00333488	32.71	1e-08	-0.4912	1.647	0.7655	TRUE
		rs112439757	C	T	-0.0150638	0.00274638	30.08	3.7e-08	-0.4406	1.3156	0.7377	TRUE
		rs12296440	G	A	-0.0183304	0.00281536	42.39	7.1e-11	-0.7679	1.2712	0.5458	TRUE
		rs12672200	G	A	0.0123725	0.0022581	30.02	4.4e-08	0.9426	1.1514	0.413	TRUE
		rs1291145	T	C	0.0184421	0.00227326	65.81	3.8e-16	-0.5439	1.0883	0.6172	TRUE
		rs12951057	C	G	0.0206177	0.00286783	51.69	6.2e-13	3.2895	1.8798	0.08013	TRUE
		rs13107325	C	T	0.0262953	0.0040139	42.92	5.1e-11	-1.0079	2.1019	0.6316	TRUE
		rs13266268	C	T	0.0121778	0.002232	29.77	4e-08	1.1145	1.1015	0.3116	TRUE
		rs1523539	G	A	-0.0127945	0.00225744	32.12	1.4e-08	-1.9003	1.0663	0.07471	TRUE
		rs17115145	C	T	0.0118294	0.00215915	30.02	4.3e-08	-0.3722	1.0248	0.7164	TRUE
		rs17720586	C	G	-0.0180045	0.00323332	31.01	2.6e-08	0.4513	1.5076	0.7647	TRUE
		rs17854357	G	C	0.0184241	0.0028244	42.55	7.1e-11	1.5593	1.3976	0.2646	TRUE
		rs189278832	G	A	0.0147509	0.00219911	44.99	2e-11	-0.0497	1.083	0.9634	TRUE
		rs191288851	G	A	-0.0265844	0.00482214	30.39	3.5e-08	-0.8127	2.3249	0.7267	TRUE
		rs2321149	T	C	-0.016651	0.00230492	52.19	4.9e-13	1.6686	1.097	0.1282	TRUE
		rs2339928	G	A	-0.0142093	0.00230465	38.01	7.4e-10	-3.1833	1.1062	0.004004	TRUE
		rs28376010	G	T	-0.0156703	0.00257946	36.91	1.1e-09	-1.6087	1.2295	0.1907	TRUE
		rs28569885	A	G	0.0146466	0.00262317	31.18	1.9e-08	2.9576	1.3917	0.03357	TRUE
		rs2960578	T	G	-0.0177248	0.00211041	70.54	5.6e-17	-0.0318	1.0079	0.9748	TRUE
		rs34198643	C	T	0.0154358	0.00252679	37.32	1.1e-09	0.9302	1.2349	0.4513	TRUE
		rs34423638	A	G	-0.0140366	0.00254242	30.48	3.4e-08	-1.5696	1.2511	0.2096	TRUE
		rs35760956	A	G	0.0119293	0.00215666	30.6	2.7e-08	-2.0095	1.0435	0.05414	TRUE
		rs3911016	T	G	-0.0207958	0.00324253	41.13	1.5e-10	-1.2302	1.5373	0.4235	TRUE
		rs4692708	A	C	-0.0139077	0.00243866	32.52	1.2e-08	0.215	1.1478	0.8514	TRUE
		rs549814	C	T	-0.0265787	0.00224791	139.8	2.1e-32	-0.6192	1.0739	0.5642	TRUE
		rs56182580	T	C	0.014312	0.0023444	37.27	1.1e-09	-0.502	1.1685	0.6675	TRUE
		rs62236533	G	A	-0.0248736	0.00343386	52.47	3.9e-13	-2.9195	2.6317	0.2673	TRUE
		rs62245792	T	A	0.0178132	0.00297699	35.8	2.3e-09	1.0526	1.5183	0.4881	TRUE
		rs67238148	G	T	-0.0141682	0.00255624	30.72	2.7e-08	-1.1027	1.2326	0.371	TRUE
		rs6774906	A	C	-0.0315005	0.00536977	34.41	4e-09	2.7596	2.7526	0.3161	TRUE
		rs6857	C	T	0.0158628	0.00280749	31.92	1.9e-08	1.0256	1.3791	0.4571	TRUE
		rs7012814	G	A	0.0159696	0.00212478	56.49	5.4e-14	1.6965	1.0486	0.1057	TRUE
		rs71552589	A	G	-0.0126107	0.00212209	35.31	2.4e-09	1.0333	1.407	0.4627	TRUE
		rs73024304	C	T	-0.0269065	0.00471573	32.55	1.1e-08	-0.8684	2.2682	0.7018	TRUE
		rs73096946	T	C	0.0171485	0.00290231	34.91	3.2e-09	1.0091	1.437	0.4825	TRUE
		rs7613360	C	T	0.0129678	0.00226977	32.64	9.3e-09	2.6857	1.0588	0.01119	TRUE
		rs78876700	G	A	-0.0168854	0.00308372	29.98	4.1e-08	0.4019	1.576	0.7987	TRUE
		rs7921	G	A	-0.0153403	0.00240923	40.54	2.1e-10	0.3374	1.1428	0.7678	TRUE
		rs7936836	C	A	-0.0140345	0.0021428	42.9	5.3e-11	-0.426	1.0415	0.6825	TRUE
		rs9504124	C	T	-0.0145386	0.00236503	37.79	8.2e-10	-0.2208	1.1187	0.8435	TRUE
		rs975303	A	G	-0.0179495	0.0027393	42.94	6.3e-11	0.4965	1.3248	0.7078	TRUE
		rs9985296	T	C	-0.0124038	0.00217289	32.59	1.1e-08	2.7579	1.0274	0.007265	TRUE
cheese_overallfreq	THICK_isthmuscingulate_thickavg1_m5e3	rs10938397	A	G	0.013263	0.00212776	38.85	3.8e-10	0.0004	0.0015	0.7976	TRUE
		rs11082575	C	G	-0.0126165	0.00216389	33.99	4.6e-09	-0.0011	0.0016	0.4726	TRUE
		rs112145286	T	C	0.0190722	0.00333488	32.71	1e-08	0.0048	0.0025	0.05262	TRUE
		rs112439757	C	T	-0.0150638	0.00274638	30.08	3.7e-08	0.0024	0.002	0.222	TRUE
		rs12296440	G	A	-0.0183304	0.00281536	42.39	7.1e-11	-0.0003	0.0019	0.8571	TRUE
		rs12672200	G	A	0.0123725	0.0022581	30.02	4.4e-08	0.0009	0.0017	0.6213	TRUE
		rs1291145	T	C	0.0184421	0.00227326	65.81	3.8e-16	0.0008	0.0016	0.6415	TRUE
		rs12951057	C	G	0.0206177	0.00286783	51.69	6.2e-13	0.0005	0.0028	0.8586	TRUE
		rs13107325	C	T	0.0262953	0.0040139	42.92	5.1e-11	0.009	0.0032	0.00452	TRUE
		rs13266268	C	T	0.0121778	0.002232	29.77	4e-08	0.001	0.0016	0.5582	TRUE
		rs1523539	G	A	-0.0127945	0.00225744	32.12	1.4e-08	-0.0019	0.0016	0.225	TRUE
		rs17115145	C	T	0.0118294	0.00215915	30.02	4.3e-08	-0.0003	0.0015	0.8511	TRUE
		rs17720586	C	G	-0.0180045	0.00323332	31.01	2.6e-08	0.0022	0.0023	0.3384	TRUE
		rs17854357	G	C	0.0184241	0.0028244	42.55	7.1e-11	-0.0001	0.0021	0.9551	TRUE
		rs189278832	G	A	0.0147509	0.00219911	44.99	2e-11	0.0005	0.0016	0.7669	TRUE
		rs191288851	G	A	-0.0265844	0.00482214	30.39	3.5e-08	0.0066	0.0035	0.06243	TRUE
		rs2321149	T	C	-0.016651	0.00230492	52.19	4.9e-13	-0.0015	0.0016	0.3528	TRUE
		rs2339928	G	A	-0.0142093	0.00230465	38.01	7.4e-10	0.0001	0.0017	0.9606	TRUE
		rs28376010	G	T	-0.0156703	0.00257946	36.91	1.1e-09	0.0016	0.0018	0.3766	TRUE
		rs28569885	A	G	0.0146466	0.00262317	31.18	1.9e-08	-0.0009	0.0021	0.6798	TRUE
		rs2960578	T	G	-0.0177248	0.00211041	70.54	5.6e-17	-0.0003	0.0015	0.8682	TRUE
		rs34198643	C	T	0.0154358	0.00252679	37.32	1.1e-09	0.0003	0.0018	0.8589	TRUE
		rs34423638	A	G	-0.0140366	0.00254242	30.48	3.4e-08	-0.0007	0.0019	0.696	TRUE
		rs35760956	A	G	0.0119293	0.00215666	30.6	2.7e-08	0.0031	0.0016	0.04565	TRUE
		rs3911016	T	G	-0.0207958	0.00324253	41.13	1.5e-10	0.0003	0.0023	0.9131	TRUE
		rs4692708	A	C	-0.0139077	0.00243866	32.52	1.2e-08	-0.0011	0.0017	0.5429	TRUE
		rs549814	C	T	-0.0265787	0.00224791	139.8	2.1e-32	0.0001	0.0016	0.9747	TRUE
		rs56182580	T	C	0.014312	0.0023444	37.27	1.1e-09	-0.0016	0.0018	0.3766	TRUE
		rs62236533	G	A	-0.0248736	0.00343386	52.47	3.9e-13	-0.0041	0.0038	0.2853	TRUE
		rs62245792	T	A	0.0178132	0.00297699	35.8	2.3e-09	0.0033	0.0023	0.1516	TRUE
		rs67238148	G	T	-0.0141682	0.00255624	30.72	2.7e-08	0.0004	0.0019	0.8283	TRUE
		rs6774906	A	C	-0.0315005	0.00536977	34.41	4e-09	-0.0011	0.0041	0.7829	TRUE
		rs6857	C	T	0.0158628	0.00280749	31.92	1.9e-08	0.001	0.0021	0.6126	TRUE
		rs7012814	G	A	0.0159696	0.00212478	56.49	5.4e-14	0.0033	0.0016	0.03556	TRUE
		rs71552589	A	G	-0.0126107	0.00212209	35.31	2.4e-09	0.0008	0.0021	0.7049	TRUE
		rs73024304	C	T	-0.0269065	0.00471573	32.55	1.1e-08	-0.0068	0.0033	0.03927	TRUE
		rs73096946	T	C	0.0171485	0.00290231	34.91	3.2e-09	0.0024	0.0022	0.2717	TRUE
		rs7613360	C	T	0.0129678	0.00226977	32.64	9.3e-09	-0.001	0.0016	0.5437	TRUE
		rs78876700	G	A	-0.0168854	0.00308372	29.98	4.1e-08	-0.0041	0.0024	0.08364	TRUE
		rs7921	G	A	-0.0153403	0.00240923	40.54	2.1e-10	0.0019	0.0017	0.2597	TRUE
		rs7936836	C	A	-0.0140345	0.0021428	42.9	5.3e-11	-0.0004	0.0016	0.8215	TRUE
		rs9504124	C	T	-0.0145386	0.00236503	37.79	8.2e-10	0.0004	0.0017	0.7976	TRUE
		rs975303	A	G	-0.0179495	0.0027393	42.94	6.3e-11	-0.0022	0.002	0.2624	TRUE
		rs9985296	T	C	-0.0124038	0.00217289	32.59	1.1e-08	-0.0011	0.0015	0.4609	TRUE
cheese_overallfreq	THICK_lingual_thickavg1_m5e3	rs10938397	A	G	0.013263	0.00212776	38.85	3.8e-10	0.0002	0.0008	0.8048	TRUE
		rs11082575	C	G	-0.0126165	0.00216389	33.99	4.6e-09	-0.0003	0.0009	0.6868	TRUE
		rs112145286	T	C	0.0190722	0.00333488	32.71	1e-08	-0.0007	0.0014	0.5936	TRUE
		rs112439757	C	T	-0.0150638	0.00274638	30.08	3.7e-08	0.0002	0.0011	0.8748	TRUE
		rs12296440	G	A	-0.0183304	0.00281536	42.39	7.1e-11	-0.0008	0.0011	0.4297	TRUE
		rs12672200	G	A	0.0123725	0.0022581	30.02	4.4e-08	0.0009	0.001	0.3631	TRUE
		rs1291145	T	C	0.0184421	0.00227326	65.81	3.8e-16	-0.0008	0.0009	0.3869	TRUE
		rs12951057	C	G	0.0206177	0.00286783	51.69	6.2e-13	0.0016	0.0016	0.3082	TRUE
		rs13107325	C	T	0.0262953	0.0040139	42.92	5.1e-11	0.0071	0.0018	5.256e-05	TRUE
		rs13266268	C	T	0.0121778	0.002232	29.77	4e-08	0.0011	0.0009	0.2445	TRUE
		rs1523539	G	A	-0.0127945	0.00225744	32.12	1.4e-08	-0.0002	0.0009	0.8009	TRUE
		rs17115145	C	T	0.0118294	0.00215915	30.02	4.3e-08	0.0006	0.0009	0.4823	TRUE
		rs17720586	C	G	-0.0180045	0.00323332	31.01	2.6e-08	0.001	0.0013	0.4346	TRUE
		rs17854357	G	C	0.0184241	0.0028244	42.55	7.1e-11	0.0002	0.0012	0.8766	TRUE
		rs189278832	G	A	0.0147509	0.00219911	44.99	2e-11	0.0008	0.0009	0.3892	TRUE
		rs191288851	G	A	-0.0265844	0.00482214	30.39	3.5e-08	-0.0022	0.0019	0.2691	TRUE
		rs2321149	T	C	-0.016651	0.00230492	52.19	4.9e-13	-0.0031	0.0009	0.000779	TRUE
		rs2339928	G	A	-0.0142093	0.00230465	38.01	7.4e-10	-0.0006	0.0009	0.5189	TRUE
		rs28376010	G	T	-0.0156703	0.00257946	36.91	1.1e-09	0	0.001	0.9981	TRUE
		rs28569885	A	G	0.0146466	0.00262317	31.18	1.9e-08	0.001	0.0011	0.3983	TRUE
		rs2960578	T	G	-0.0177248	0.00211041	70.54	5.6e-17	0.0001	0.0008	0.9214	TRUE
		rs34198643	C	T	0.0154358	0.00252679	37.32	1.1e-09	0.0004	0.001	0.7325	TRUE
		rs34423638	A	G	-0.0140366	0.00254242	30.48	3.4e-08	-0.0001	0.001	0.93	TRUE
		rs35760956	A	G	0.0119293	0.00215666	30.6	2.7e-08	0	0.0009	0.9713	TRUE
		rs3911016	T	G	-0.0207958	0.00324253	41.13	1.5e-10	-0.0017	0.0013	0.1841	TRUE
		rs4692708	A	C	-0.0139077	0.00243866	32.52	1.2e-08	0	0.001	0.9907	TRUE
		rs549814	C	T	-0.0265787	0.00224791	139.8	2.1e-32	0.0001	0.0009	0.8917	TRUE
		rs56182580	T	C	0.014312	0.0023444	37.27	1.1e-09	-0.0002	0.001	0.859	TRUE
		rs62236533	G	A	-0.0248736	0.00343386	52.47	3.9e-13	0.0007	0.0021	0.7434	TRUE
		rs62245792	T	A	0.0178132	0.00297699	35.8	2.3e-09	-0.0006	0.0013	0.6209	TRUE
		rs67238148	G	T	-0.0141682	0.00255624	30.72	2.7e-08	-0.0001	0.001	0.9045	TRUE
		rs6774906	A	C	-0.0315005	0.00536977	34.41	4e-09	0.0002	0.0022	0.9456	TRUE
		rs6857	C	T	0.0158628	0.00280749	31.92	1.9e-08	-0.0014	0.0012	0.2429	TRUE
		rs7012814	G	A	0.0159696	0.00212478	56.49	5.4e-14	0.0009	0.0009	0.2888	TRUE
		rs71552589	A	G	-0.0126107	0.00212209	35.31	2.4e-09	-0.0002	0.0012	0.8863	TRUE
		rs73024304	C	T	-0.0269065	0.00471573	32.55	1.1e-08	-0.001	0.0018	0.578	TRUE
		rs73096946	T	C	0.0171485	0.00290231	34.91	3.2e-09	0.0013	0.0012	0.2944	TRUE
		rs7613360	C	T	0.0129678	0.00226977	32.64	9.3e-09	-0.0003	0.0009	0.7631	TRUE
		rs78876700	G	A	-0.0168854	0.00308372	29.98	4.1e-08	0.0005	0.0013	0.7031	TRUE
		rs7921	G	A	-0.0153403	0.00240923	40.54	2.1e-10	-0.0002	0.0009	0.8274	TRUE
		rs7936836	C	A	-0.0140345	0.0021428	42.9	5.3e-11	0.0012	0.0009	0.1536	TRUE
		rs9504124	C	T	-0.0145386	0.00236503	37.79	8.2e-10	0.001	0.0009	0.2884	TRUE
		rs975303	A	G	-0.0179495	0.0027393	42.94	6.3e-11	-0.0012	0.0011	0.2876	TRUE
		rs9985296	T	C	-0.0124038	0.00217289	32.59	1.1e-08	0	0.0009	0.9908	TRUE
cheese_overallfreq	THICK_middletemporal_thickavg1_m5e3	rs10938397	A	G	0.013263	0.00212776	38.85	3.8e-10	0.0008	0.0009	0.4005	TRUE
		rs11082575	C	G	-0.0126165	0.00216389	33.99	4.6e-09	-0.0012	0.001	0.2226	TRUE
		rs112145286	T	C	0.0190722	0.00333488	32.71	1e-08	-0.0009	0.0015	0.5594	TRUE
		rs112439757	C	T	-0.0150638	0.00274638	30.08	3.7e-08	0.0013	0.0012	0.2694	TRUE
		rs12296440	G	A	-0.0183304	0.00281536	42.39	7.1e-11	0.0006	0.0012	0.5875	TRUE
		rs12672200	G	A	0.0123725	0.0022581	30.02	4.4e-08	0.0004	0.0011	0.7205	TRUE
		rs1291145	T	C	0.0184421	0.00227326	65.81	3.8e-16	0.0001	0.001	0.9317	TRUE
		rs12951057	C	G	0.0206177	0.00286783	51.69	6.2e-13	-0.0002	0.0017	0.902	TRUE
		rs13107325	C	T	0.0262953	0.0040139	42.92	5.1e-11	-0.0047	0.002	0.01543	TRUE
		rs13266268	C	T	0.0121778	0.002232	29.77	4e-08	0.0002	0.001	0.82	TRUE
		rs1523539	G	A	-0.0127945	0.00225744	32.12	1.4e-08	-0.0011	0.001	0.2844	TRUE
		rs17115145	C	T	0.0118294	0.00215915	30.02	4.3e-08	-0.0003	0.0009	0.7784	TRUE
		rs17720586	C	G	-0.0180045	0.00323332	31.01	2.6e-08	0.0018	0.0014	0.2007	TRUE
		rs17854357	G	C	0.0184241	0.0028244	42.55	7.1e-11	-0.0014	0.0013	0.2745	TRUE
		rs189278832	G	A	0.0147509	0.00219911	44.99	2e-11	0.0006	0.001	0.5649	TRUE
		rs191288851	G	A	-0.0265844	0.00482214	30.39	3.5e-08	-0.0007	0.0022	0.7564	TRUE
		rs2321149	T	C	-0.016651	0.00230492	52.19	4.9e-13	0.0013	0.001	0.1855	TRUE
		rs2339928	G	A	-0.0142093	0.00230465	38.01	7.4e-10	0.0011	0.001	0.2779	TRUE
		rs28376010	G	T	-0.0156703	0.00257946	36.91	1.1e-09	0.0002	0.0011	0.8394	TRUE
		rs28569885	A	G	0.0146466	0.00262317	31.18	1.9e-08	-0.0001	0.0013	0.9542	TRUE
		rs2960578	T	G	-0.0177248	0.00211041	70.54	5.6e-17	0.0001	0.0009	0.9069	TRUE
		rs34198643	C	T	0.0154358	0.00252679	37.32	1.1e-09	0	0.0011	0.9996	TRUE
		rs34423638	A	G	-0.0140366	0.00254242	30.48	3.4e-08	0.0004	0.0012	0.7546	TRUE
		rs35760956	A	G	0.0119293	0.00215666	30.6	2.7e-08	-0.0003	0.001	0.7634	TRUE
		rs3911016	T	G	-0.0207958	0.00324253	41.13	1.5e-10	-0.0027	0.0014	0.06145	TRUE
		rs4692708	A	C	-0.0139077	0.00243866	32.52	1.2e-08	0.0007	0.0011	0.5093	TRUE
		rs549814	C	T	-0.0265787	0.00224791	139.8	2.1e-32	0.0017	0.001	0.08208	TRUE
		rs56182580	T	C	0.014312	0.0023444	37.27	1.1e-09	-0.0001	0.0011	0.9542	TRUE
		rs62236533	G	A	-0.0248736	0.00343386	52.47	3.9e-13	0.0038	0.0024	0.1081	TRUE
		rs62245792	T	A	0.0178132	0.00297699	35.8	2.3e-09	0.0012	0.0014	0.3991	TRUE
		rs67238148	G	T	-0.0141682	0.00255624	30.72	2.7e-08	0.0001	0.0011	0.9422	TRUE
		rs6774906	A	C	-0.0315005	0.00536977	34.41	4e-09	0.0018	0.0025	0.4611	TRUE
		rs6857	C	T	0.0158628	0.00280749	31.92	1.9e-08	-0.0003	0.0013	0.8257	TRUE
		rs7012814	G	A	0.0159696	0.00212478	56.49	5.4e-14	-0.0001	0.001	0.9151	TRUE
		rs71552589	A	G	-0.0126107	0.00212209	35.31	2.4e-09	0.0014	0.0013	0.2771	TRUE
		rs73024304	C	T	-0.0269065	0.00471573	32.55	1.1e-08	0.0009	0.0021	0.6588	TRUE
		rs73096946	T	C	0.0171485	0.00290231	34.91	3.2e-09	-0.001	0.0013	0.437	TRUE
		rs7613360	C	T	0.0129678	0.00226977	32.64	9.3e-09	-0.0011	0.001	0.2609	TRUE
		rs78876700	G	A	-0.0168854	0.00308372	29.98	4.1e-08	0.0004	0.0015	0.7836	TRUE
		rs7921	G	A	-0.0153403	0.00240923	40.54	2.1e-10	0.0004	0.0011	0.691	TRUE
		rs7936836	C	A	-0.0140345	0.0021428	42.9	5.3e-11	0.0013	0.001	0.1655	TRUE
		rs9504124	C	T	-0.0145386	0.00236503	37.79	8.2e-10	0.0005	0.001	0.6176	TRUE
		rs975303	A	G	-0.0179495	0.0027393	42.94	6.3e-11	-0.0017	0.0012	0.1596	TRUE
		rs9985296	T	C	-0.0124038	0.00217289	32.59	1.1e-08	0.0004	0.001	0.6702	TRUE
cheese_overallfreq	THICK_rostralmiddlefrontal_thickavg1_m5e3	rs10938397	A	G	0.013263	0.00212776	38.85	3.8e-10	0.0006	0.0008	0.4266	TRUE
		rs11082575	C	G	-0.0126165	0.00216389	33.99	4.6e-09	0.0004	0.0008	0.5631	TRUE
		rs112145286	T	C	0.0190722	0.00333488	32.71	1e-08	0.002	0.0012	0.1009	TRUE
		rs112439757	C	T	-0.0150638	0.00274638	30.08	3.7e-08	0.0005	0.001	0.6398	TRUE
		rs12296440	G	A	-0.0183304	0.00281536	42.39	7.1e-11	-0.0001	0.0009	0.8972	TRUE
		rs12672200	G	A	0.0123725	0.0022581	30.02	4.4e-08	0.0002	0.0008	0.8336	TRUE
		rs1291145	T	C	0.0184421	0.00227326	65.81	3.8e-16	-0.0002	0.0008	0.8171	TRUE
		rs12951057	C	G	0.0206177	0.00286783	51.69	6.2e-13	0.0009	0.0014	0.5328	TRUE
		rs13107325	C	T	0.0262953	0.0040139	42.92	5.1e-11	-0.0051	0.0016	0.001074	TRUE
		rs13266268	C	T	0.0121778	0.002232	29.77	4e-08	-0.0015	0.0008	0.0579	TRUE
		rs1523539	G	A	-0.0127945	0.00225744	32.12	1.4e-08	0.001	0.0008	0.1884	TRUE
		rs17115145	C	T	0.0118294	0.00215915	30.02	4.3e-08	0	0.0008	0.9749	TRUE
		rs17720586	C	G	-0.0180045	0.00323332	31.01	2.6e-08	-0.0009	0.0011	0.419	TRUE
		rs17854357	G	C	0.0184241	0.0028244	42.55	7.1e-11	0.0027	0.001	0.007679	TRUE
		rs189278832	G	A	0.0147509	0.00219911	44.99	2e-11	0.0003	0.0008	0.6916	TRUE
		rs191288851	G	A	-0.0265844	0.00482214	30.39	3.5e-08	-0.0024	0.0017	0.1715	TRUE
		rs2321149	T	C	-0.016651	0.00230492	52.19	4.9e-13	-0.0008	0.0008	0.3115	TRUE
		rs2339928	G	A	-0.0142093	0.00230465	38.01	7.4e-10	0.0009	0.0008	0.2538	TRUE
		rs28376010	G	T	-0.0156703	0.00257946	36.91	1.1e-09	-0.002	0.0009	0.03108	TRUE
		rs28569885	A	G	0.0146466	0.00262317	31.18	1.9e-08	0.0013	0.001	0.2179	TRUE
		rs2960578	T	G	-0.0177248	0.00211041	70.54	5.6e-17	-0.0002	0.0007	0.7696	TRUE
		rs34198643	C	T	0.0154358	0.00252679	37.32	1.1e-09	-0.0003	0.0009	0.7085	TRUE
		rs34423638	A	G	-0.0140366	0.00254242	30.48	3.4e-08	-0.0011	0.0009	0.2459	TRUE
		rs35760956	A	G	0.0119293	0.00215666	30.6	2.7e-08	0.0002	0.0008	0.794	TRUE
		rs3911016	T	G	-0.0207958	0.00324253	41.13	1.5e-10	-0.0024	0.0011	0.03275	TRUE
		rs4692708	A	C	-0.0139077	0.00243866	32.52	1.2e-08	-0.0002	0.0008	0.8093	TRUE
		rs549814	C	T	-0.0265787	0.00224791	139.8	2.1e-32	-0.001	0.0008	0.204	TRUE
		rs56182580	T	C	0.014312	0.0023444	37.27	1.1e-09	0.0014	0.0009	0.1081	TRUE
		rs62236533	G	A	-0.0248736	0.00343386	52.47	3.9e-13	-0.0015	0.002	0.4311	TRUE
		rs62245792	T	A	0.0178132	0.00297699	35.8	2.3e-09	0.0007	0.0011	0.5317	TRUE
		rs67238148	G	T	-0.0141682	0.00255624	30.72	2.7e-08	-0.0007	0.0009	0.4392	TRUE
		rs6774906	A	C	-0.0315005	0.00536977	34.41	4e-09	-0.0008	0.002	0.6848	TRUE
		rs6857	C	T	0.0158628	0.00280749	31.92	1.9e-08	0.0014	0.001	0.1822	TRUE
		rs7012814	G	A	0.0159696	0.00212478	56.49	5.4e-14	-0.0002	0.0008	0.814	TRUE
		rs71552589	A	G	-0.0126107	0.00212209	35.31	2.4e-09	-0.0005	0.0011	0.6233	TRUE
		rs73024304	C	T	-0.0269065	0.00471573	32.55	1.1e-08	0.0016	0.0017	0.3298	TRUE
		rs73096946	T	C	0.0171485	0.00290231	34.91	3.2e-09	-0.0014	0.0011	0.1869	TRUE
		rs7613360	C	T	0.0129678	0.00226977	32.64	9.3e-09	0.0012	0.0008	0.1291	TRUE
		rs78876700	G	A	-0.0168854	0.00308372	29.98	4.1e-08	0.0008	0.0012	0.4834	TRUE
		rs7921	G	A	-0.0153403	0.00240923	40.54	2.1e-10	-0.0013	0.0008	0.1309	TRUE
		rs7936836	C	A	-0.0140345	0.0021428	42.9	5.3e-11	0.0004	0.0008	0.6317	TRUE
		rs9504124	C	T	-0.0145386	0.00236503	37.79	8.2e-10	-0.0006	0.0008	0.4403	TRUE
		rs975303	A	G	-0.0179495	0.0027393	42.94	6.3e-11	-0.0003	0.001	0.7249	TRUE
		rs9985296	T	C	-0.0124038	0.00217289	32.59	1.1e-08	0.0009	0.0008	0.2592	TRUE
coffee_cupsperday	SA_parahippocampal	rs1057868	C	T	-0.0290606	0.00232079	156.8	5.1e-36	-1.6757	0.7851	0.03282	TRUE
		rs10871777	A	G	-0.0246756	0.00247061	99.75	1.9e-23	-0.4447	0.8171	0.5863	TRUE
		rs11060255	G	A	-0.0115506	0.00211568	29.81	3e-08	0.0835	0.7868	0.9154	TRUE
		rs11127048	G	A	-0.0219176	0.00218876	100.27	2.7e-23	-0.2454	0.7802	0.7531	TRUE
		rs115109216	C	G	0.0274332	0.00460165	35.54	2.4e-09	2.1148	1.623	0.1926	TRUE
		rs117810762	G	A	-0.0464751	0.00804133	33.4	8.3e-09	-4.7578	2.833	0.09307	TRUE
		rs12514566	G	A	0.0146071	0.00221837	43.36	5.1e-11	0.4278	0.7434	0.565	TRUE
		rs13054099	T	C	0.0155424	0.00238679	42.4	6.9e-11	0.5741	0.8587	0.5038	TRUE
		rs13166120	G	A	-0.0182613	0.00288177	40.16	1.4e-10	-0.6146	0.9474	0.5165	TRUE
		rs13271359	C	T	0.0144948	0.00240812	36.23	1.4e-09	-1.0388	0.8447	0.2188	TRUE
		rs13387090	G	T	0.0250305	0.0028048	79.64	3.5e-19	1.2914	1.0176	0.2044	TRUE
		rs1487441	G	A	-0.0120743	0.00210708	32.84	9.6e-09	-0.3093	0.7001	0.6586	TRUE
		rs17144566	C	T	0.0140843	0.00264416	28.37	4.3e-08	-1.3334	0.8936	0.1356	TRUE
		rs189383553	T	A	-0.0238321	0.00433336	30.25	3.1e-08	-2.8837	1.8169	0.1125	TRUE
		rs2189234	T	G	-0.0133307	0.00215787	38.16	4.6e-10	0.6703	0.7305	0.3589	TRUE
		rs2231142	G	T	0.0251879	0.00329918	58.29	1.2e-14	1.7965	1.1147	0.107	TRUE
		rs2465037	C	A	0.0163951	0.00222239	54.42	2.9e-13	0.4862	0.7458	0.5144	TRUE
		rs2472297	C	T	-0.0685684	0.00238049	829.69	1.5e-182	-0.8994	0.8506	0.2903	TRUE
		rs2763981	T	A	0.013913	0.00222488	39.1	2.3e-10	0.7065	0.7782	0.3639	TRUE
		rs329122	G	A	0.0122708	0.00212875	33.23	7.3e-09	1.5124	0.7092	0.03296	TRUE
		rs34060476	A	G	-0.0309338	0.00308455	100.57	1.6e-23	1.8334	1.1178	0.101	TRUE
		rs4410790	T	C	-0.0568791	0.00217711	682.57	1.1e-150	-0.9914	0.7299	0.1743	TRUE
		rs4615895	G	A	-0.0147976	0.00240255	37.93	5.8e-10	1.1653	0.7961	0.1432	TRUE
		rs4925114	A	G	-0.0141622	0.00221785	40.78	2e-10	-0.8031	0.7399	0.2778	TRUE
		rs56113850	T	C	-0.0186901	0.00212407	77.43	8.2e-19	-1.1051	0.9583	0.2488	TRUE
		rs574367	G	T	-0.0159501	0.00257628	38.33	3.3e-10	-0.2931	0.8827	0.7399	TRUE
		rs6062357	C	T	-0.0147077	0.00213797	47.32	4e-12	0.367	0.7077	0.604	TRUE
		rs6063085	A	C	-0.0147547	0.00216986	46.24	6.7e-12	-0.3998	0.732	0.5849	TRUE
		rs6227	C	T	0.013657	0.00224289	37.08	1.4e-09	-1.3106	0.7755	0.09104	TRUE
		rs627933	A	G	0.0127799	0.00226291	31.89	1.1e-08	-0.0302	0.7555	0.9681	TRUE
		rs630194	T	C	0.012602	0.00220901	32.54	9.8e-09	-0.8832	0.7377	0.2312	TRUE
		rs7209484	T	C	0.0156335	0.0024658	40.2	1.9e-10	-0.0236	0.8607	0.9781	TRUE
		rs73075167	A	T	0.0231791	0.00317322	53.36	3.7e-13	-0.6318	1.1346	0.5776	TRUE
		rs7502307	C	G	-0.0148724	0.00264103	31.71	2.1e-08	-2.8386	1.1825	0.01637	TRUE
		rs75347775	G	A	-0.0146425	0.00244212	35.95	1.4e-09	-0.294	0.8708	0.7356	TRUE
		rs8056750	C	T	-0.0140255	0.00225709	38.61	5.8e-10	2.3451	1.2159	0.05377	TRUE
		rs874573	A	T	-0.0136508	0.00246795	30.59	2.7e-08	-0.5578	0.8218	0.4972	TRUE
		rs9398171	C	T	-0.0128985	0.00231613	31.01	1.8e-08	-2.1355	0.7711	0.005617	TRUE
		rs9940128	G	A	-0.0209822	0.00212394	97.59	2.8e-23	0.4692	0.7106	0.5091	TRUE
coffee_cupsperday	THICK_entorhinal	rs1057868	C	T	-0.0290606	0.00232079	156.8	5.1e-36	-0.004	0.0032	0.2092	TRUE
		rs10871777	A	G	-0.0246756	0.00247061	99.75	1.9e-23	0.0045	0.0033	0.1753	TRUE
		rs11060255	G	A	-0.0115506	0.00211568	29.81	3e-08	0.0012	0.0031	0.6932	TRUE
		rs11127048	G	A	-0.0219176	0.00218876	100.27	2.7e-23	0.0022	0.0032	0.4926	TRUE
		rs115109216	C	G	0.0274332	0.00460165	35.54	2.4e-09	-0.0089	0.0066	0.1788	TRUE
		rs117810762	G	A	-0.0464751	0.00804133	33.4	8.3e-09	-0.0102	0.0121	0.3982	TRUE
		rs12514566	G	A	0.0146071	0.00221837	43.36	5.1e-11	-0.0038	0.003	0.1978	TRUE
		rs13054099	T	C	0.0155424	0.00238679	42.4	6.9e-11	-0.0033	0.0034	0.3402	TRUE
		rs13166120	G	A	-0.0182613	0.00288177	40.16	1.4e-10	0.0022	0.0038	0.5701	TRUE
		rs13271359	C	T	0.0144948	0.00240812	36.23	1.4e-09	0.0003	0.0034	0.9388	TRUE
		rs13387090	G	T	0.0250305	0.0028048	79.64	3.5e-19	-0.0014	0.0041	0.7332	TRUE
		rs1487441	G	A	-0.0120743	0.00210708	32.84	9.6e-09	-0.003	0.0028	0.2908	TRUE
		rs17144566	C	T	0.0140843	0.00264416	28.37	4.3e-08	0.0011	0.0036	0.7624	TRUE
		rs189383553	T	A	-0.0238321	0.00433336	30.25	3.1e-08	-0.0008	0.0074	0.9141	TRUE
		rs2189234	T	G	-0.0133307	0.00215787	38.16	4.6e-10	-0.002	0.0029	0.4986	TRUE
		rs2231142	G	T	0.0251879	0.00329918	58.29	1.2e-14	-0.0025	0.0045	0.5758	TRUE
		rs2465037	C	A	0.0163951	0.00222239	54.42	2.9e-13	0.0025	0.003	0.3949	TRUE
		rs2472297	C	T	-0.0685684	0.00238049	829.69	1.5e-182	0.0032	0.0034	0.3494	TRUE
		rs2763981	T	A	0.013913	0.00222488	39.1	2.3e-10	-0.0019	0.0031	0.5476	TRUE
		rs329122	G	A	0.0122708	0.00212875	33.23	7.3e-09	0.001	0.0029	0.733	TRUE
		rs34060476	A	G	-0.0309338	0.00308455	100.57	1.6e-23	0.0082	0.0044	0.06603	TRUE
		rs4410790	T	C	-0.0568791	0.00217711	682.57	1.1e-150	-0.0004	0.0029	0.8818	TRUE
		rs4615895	G	A	-0.0147976	0.00240255	37.93	5.8e-10	0.0065	0.0032	0.04161	TRUE
		rs4925114	A	G	-0.0141622	0.00221785	40.78	2e-10	0.001	0.003	0.7285	TRUE
		rs56113850	T	C	-0.0186901	0.00212407	77.43	8.2e-19	0.0047	0.0037	0.2113	TRUE
		rs574367	G	T	-0.0159501	0.00257628	38.33	3.3e-10	0.0029	0.0035	0.4188	TRUE
		rs6062357	C	T	-0.0147077	0.00213797	47.32	4e-12	-0.001	0.0029	0.7203	TRUE
		rs6063085	A	C	-0.0147547	0.00216986	46.24	6.7e-12	0.0021	0.0029	0.4742	TRUE
		rs6227	C	T	0.013657	0.00224289	37.08	1.4e-09	-0.0012	0.0031	0.6927	TRUE
		rs627933	A	G	0.0127799	0.00226291	31.89	1.1e-08	-0.001	0.003	0.751	TRUE
		rs630194	T	C	0.012602	0.00220901	32.54	9.8e-09	0.0024	0.003	0.4214	TRUE
		rs7209484	T	C	0.0156335	0.0024658	40.2	1.9e-10	-0.0026	0.0035	0.4582	TRUE
		rs73075167	A	T	0.0231791	0.00317322	53.36	3.7e-13	0.0037	0.0045	0.4075	TRUE
		rs7502307	C	G	-0.0148724	0.00264103	31.71	2.1e-08	0.0097	0.0047	0.03829	TRUE
		rs75347775	G	A	-0.0146425	0.00244212	35.95	1.4e-09	0.0013	0.0035	0.7175	TRUE
		rs8056750	C	T	-0.0140255	0.00225709	38.61	5.8e-10	-0.0017	0.0046	0.71	TRUE
		rs874573	A	T	-0.0136508	0.00246795	30.59	2.7e-08	0.0008	0.0033	0.8102	TRUE
		rs9398171	C	T	-0.0128985	0.00231613	31.01	1.8e-08	0.0084	0.0031	0.00664	TRUE
		rs9940128	G	A	-0.0209822	0.00212394	97.59	2.8e-23	0.0019	0.0029	0.5064	TRUE
cookedveg_TBSperday	THICK_lingual	rs10020708	C	A	0.0119677	0.00211707	31.96	2.1e-08	-0.0002	0.0009	0.8292	TRUE
		rs1009382	C	T	0.015655	0.00231754	45.63	1.6e-11	-0.0007	0.001	0.4813	TRUE
		rs10129582	A	G	0.0116769	0.0021402	29.77	4.3e-08	0	0.0009	0.9887	TRUE
		rs10156602	A	G	-0.0143264	0.00221088	41.99	8.3e-11	-0.0034	0.0009	8.703e-05	TRUE
		rs10161952	A	C	0.0128505	0.00227764	31.83	1.8e-08	0.0006	0.0009	0.5065	TRUE
		rs113993820	G	T	0.042181	0.00773388	29.75	4.9e-08	-0.0035	0.0032	0.2829	TRUE
		rs12190945	A	G	0.0130091	0.00231404	31.6	1.7e-08	-0.001	0.0009	0.2501	TRUE
		rs12629972	T	C	-0.0152647	0.00214848	50.48	1.6e-12	-0.0012	0.0009	0.1766	TRUE
		rs1421085	T	C	-0.0117763	0.00214936	30.02	3.7e-08	0.0001	0.0009	0.928	TRUE
		rs1534749	T	C	0.0114885	0.00211212	29.59	4.8e-08	-0.0005	0.0008	0.5335	TRUE
		rs17653477	A	G	0.033552	0.0061255	30	4.3e-08	0.0049	0.0034	0.1473	TRUE
		rs17714824	G	T	-0.0153075	0.00278547	30.2	4.8e-08	-0.0012	0.0011	0.2672	TRUE
		rs1982350	A	G	-0.0156373	0.00220674	50.21	1e-12	-0.0001	0.0009	0.9275	TRUE
		rs1986972	G	A	-0.0162049	0.00219161	54.67	1.8e-13	-0.0007	0.0009	0.4242	TRUE
		rs2102738	A	C	0.0167844	0.00281914	35.45	2.7e-09	0.0025	0.0012	0.03177	TRUE
		rs2252508	A	G	-0.0136504	0.00211072	41.82	9.5e-11	-0.0006	0.0008	0.4817	TRUE
		rs33947258	C	A	-0.013624	0.00241732	31.76	1.7e-08	-0.0012	0.001	0.232	TRUE
		rs4851029	T	G	-0.0133401	0.00211257	39.87	2.5e-10	-0.0009	0.0008	0.2756	TRUE
		rs565044	C	A	0.0121618	0.00219245	30.77	2.9e-08	-0.0002	0.0009	0.84	TRUE
		rs6265	C	T	0.015531	0.00269598	33.19	7e-09	0.0005	0.0011	0.6453	TRUE
		rs6975898	T	G	0.0121186	0.00219618	30.45	2.8e-08	0	0.0009	0.983	TRUE
		rs78873660	T	C	-0.0149392	0.00226844	43.37	3.7e-11	0.0007	0.0009	0.4309	TRUE
		rs838133	A	G	-0.0179662	0.00218513	67.6	2.5e-16	-0.0014	0.0011	0.1989	TRUE
doyouaddsalt	SA_cuneus	rs1008078	C	T	-0.012173	0.0021364	32.47	1.7e-08	-0.3241	1.368	0.8127	TRUE
		rs1025132	G	A	0.0124913	0.00212321	34.61	1.7e-09	1.1231	1.3299	0.3984	TRUE
		rs10410950	G	A	0.0260306	0.00480052	29.4	3.3e-08	4.8054	3.0489	0.115	TRUE
		rs1045411	C	T	0.0141751	0.00235733	36.16	2.8e-09	0.1333	1.5319	0.9307	TRUE
		rs10484759	C	T	-0.0135257	0.00240944	31.51	2.6e-08	-1.2445	1.5826	0.4317	TRUE
		rs10736951	G	C	0.0139776	0.00218118	41.07	1.2e-10	-0.0767	1.4067	0.9565	TRUE
		rs10752999	A	C	-0.0153999	0.00227963	45.64	9.6e-12	-0.4517	1.4474	0.755	TRUE
		rs10971930	T	C	-0.0173451	0.00313086	30.69	4.2e-08	2.8305	1.9733	0.1515	TRUE
		rs11764779	A	G	0.0189877	0.00280873	45.7	7.6e-12	2.0576	1.9653	0.2951	TRUE
		rs12579995	G	A	-0.0213731	0.00277803	59.19	2.1e-14	0.2769	1.7856	0.8768	TRUE
		rs12658060	T	C	0.0267679	0.00250903	113.82	9.5e-27	1.864	1.5643	0.2334	TRUE
		rs13114613	G	C	-0.0154827	0.00246195	39.55	2.8e-10	-1.4142	1.5822	0.3714	TRUE
		rs13131880	T	C	0.0157722	0.00251714	39.26	2.3e-10	-0.5652	1.592	0.7226	TRUE
		rs1339157	T	C	0.0131669	0.00208996	39.69	6.4e-10	0.1544	1.3375	0.9081	TRUE
		rs13400612	C	G	-0.0214908	0.00241859	78.96	1.1e-18	-0.5568	1.5386	0.7174	TRUE
		rs151174	C	T	0.0121016	0.00212199	32.52	6.8e-09	0.0816	1.4036	0.9536	TRUE
		rs16858942	G	C	-0.0174643	0.00272592	41.05	1.9e-10	2.5445	1.7387	0.1433	TRUE
		rs1726866	G	A	-0.0292427	0.00209503	194.83	7.5e-44	-0.7767	1.4036	0.58	TRUE
		rs17805497	T	C	-0.0131236	0.00219019	35.9	2.3e-09	-1.4149	1.3846	0.3068	TRUE
		rs1965024	G	A	0.0122508	0.0022117	30.68	3.7e-08	3.2461	1.4251	0.02274	TRUE
		rs2339234	G	A	0.0164267	0.00224793	53.4	3.1e-13	1.133	1.415	0.4233	TRUE
		rs2463710	T	A	-0.0150494	0.00259388	33.66	1.3e-08	-1.9756	1.6595	0.2339	TRUE
		rs2687169	T	C	0.0170637	0.00220692	59.78	6.8e-15	-1.6082	1.3695	0.2403	TRUE
		rs2693687	C	T	-0.0131315	0.00215432	37.15	9.4e-10	-1.2959	1.3842	0.3492	TRUE
		rs2704357	T	C	-0.0146996	0.00215437	46.56	5.2e-12	3.1957	1.3704	0.0197	TRUE
		rs2736748	A	G	-0.0278861	0.00255891	118.76	4.6e-28	0.6069	1.6634	0.7152	TRUE
		rs28366151	C	T	0.0205449	0.00321726	40.78	1.5e-10	-1.2548	2.4104	0.6027	TRUE
		rs2852348	A	G	0.0137974	0.00210334	43.03	4.1e-11	-1.211	1.3183	0.3583	TRUE
		rs2861885	C	A	-0.0181237	0.0032603	30.9	3.7e-08	0.2232	2.0333	0.9126	TRUE
		rs2899548	C	T	0.0181775	0.00327743	30.76	1.8e-08	-2.1388	2.0359	0.2935	TRUE
		rs329670	T	C	0.0181644	0.00311217	34.07	3.1e-09	-0.0957	2.0495	0.9628	TRUE
		rs33137	C	T	0.0137515	0.00209755	42.98	6.9e-11	-1.3577	1.3471	0.3135	TRUE
		rs34906832	A	G	-0.0170693	0.00298793	32.64	1.3e-08	0.9111	1.933	0.6374	TRUE
		rs35099536	A	C	-0.0261379	0.00379331	47.48	6.8e-12	-0.7866	2.4394	0.7471	TRUE
		rs35271178	C	T	-0.0117537	0.00211977	30.74	4.8e-08	-0.6399	1.3471	0.6348	TRUE
		rs35499833	G	C	0.0133987	0.00225411	35.33	4e-09	-3.5714	1.4491	0.01372	TRUE
		rs453585	G	A	-0.017296	0.00215153	64.62	4.5e-16	-0.3365	1.341	0.8019	TRUE
		rs4601984	G	T	0.0123962	0.00218045	32.32	1.2e-08	-1.2586	1.3827	0.3627	TRUE
		rs4708063	G	T	0.0121135	0.00208862	33.64	4.5e-09	1.7527	1.3382	0.1903	TRUE
		rs4739105	T	C	-0.0163205	0.00257873	40.05	3.1e-10	-2.9604	1.6485	0.07251	TRUE
		rs4856591	T	G	0.0185377	0.00218157	72.21	2.6e-17	0.7742	1.4604	0.5961	TRUE
		rs4948275	C	T	-0.0157797	0.00209757	56.59	7.8e-14	-0.0643	1.3561	0.9622	TRUE
		rs4948441	G	A	0.0195402	0.00213729	83.59	8.9e-20	-0.6397	1.3618	0.6385	TRUE
		rs4955432	C	T	0.0142249	0.00240822	34.89	4.4e-09	3.0471	1.3711	0.02626	TRUE
		rs4981196	A	C	0.0120799	0.00215689	31.37	2.1e-08	-0.1954	1.3687	0.8865	TRUE
		rs510901	T	C	0.0121888	0.00215053	32.12	1.3e-08	-1.595	1.3457	0.2359	TRUE
		rs528301	G	A	-0.0165867	0.00209508	62.68	1.4e-15	-2.8815	1.3445	0.03209	TRUE
		rs56407270	G	A	0.014201	0.00257829	30.34	3.1e-08	0.3755	1.6254	0.8173	TRUE
		rs58844557	C	T	0.0148977	0.00261238	32.52	1.7e-08	1.6078	1.7933	0.37	TRUE
		rs62098445	C	A	0.0169758	0.00226302	56.27	3.9e-14	0.6355	1.469	0.6653	TRUE
		rs62183023	C	T	-0.0134574	0.00227623	34.95	1.9e-09	0.1757	1.5255	0.9083	TRUE
		rs6443950	A	T	0.0133417	0.00216562	37.95	1.2e-09	0.4033	1.43	0.7779	TRUE
		rs6887291	T	G	-0.0152731	0.00217546	49.29	2.3e-12	0.1406	1.3899	0.9194	TRUE
		rs6958837	A	C	0.0191568	0.00349031	30.12	4.3e-08	-0.1856	2.1348	0.9307	TRUE
		rs73544827	C	G	-0.0169107	0.00305664	30.61	2.9e-08	-0.235	2.0131	0.9071	TRUE
		rs7591518	T	C	0.0219329	0.00228402	92.21	5.5e-22	-0.186	1.4404	0.8972	TRUE
		rs80253017	T	C	0.0252667	0.00443938	32.39	7.6e-09	6.4357	2.8329	0.0231	TRUE
		rs803375	G	T	-0.018341	0.00214703	72.97	1.4e-17	-0.4993	1.3616	0.7139	TRUE
		rs868720	G	C	-0.0160109	0.00228043	49.29	1.9e-12	-1.2512	1.4356	0.3835	TRUE
		rs925946	T	G	0.0127094	0.0022456	32.03	1e-08	-0.791	1.424	0.5786	TRUE
		rs9278020	G	A	-0.0236212	0.00339732	48.34	2.2e-12	-3.6468	2.8093	0.1943	TRUE
		rs9401250	C	T	0.0116843	0.00209375	31.14	1.9e-08	1.6474	1.3424	0.2198	TRUE
		rs951901	C	A	0.0123009	0.00220097	31.24	2.2e-08	1.7859	1.4168	0.2075	TRUE
		rs9852600	C	T	-0.020718	0.00276319	56.22	7.7e-14	-2.0101	1.7879	0.2609	TRUE
		rs9971382	G	T	-0.0167701	0.00208898	64.45	8e-16	-0.4499	1.313	0.7318	TRUE
doyouaddsalt	SA_lingual	rs1008078	C	T	-0.012173	0.0021364	32.47	1.7e-08	-2.6235	2.7779	0.345	TRUE
		rs1025132	G	A	0.0124913	0.00212321	34.61	1.7e-09	3.7717	2.6972	0.162	TRUE
		rs10410950	G	A	0.0260306	0.00480052	29.4	3.3e-08	-0.8429	6.2425	0.8926	TRUE
		rs1045411	C	T	0.0141751	0.00235733	36.16	2.8e-09	8.0929	3.1131	0.009333	TRUE
		rs10484759	C	T	-0.0135257	0.00240944	31.51	2.6e-08	-8.569	3.216	0.007711	TRUE
		rs10736951	G	C	0.0139776	0.00218118	41.07	1.2e-10	-0.3574	2.8566	0.9004	TRUE
		rs10752999	A	C	-0.0153999	0.00227963	45.64	9.6e-12	-2.7763	2.9336	0.344	TRUE
		rs10971930	T	C	-0.0173451	0.00313086	30.69	4.2e-08	3.5353	4.0075	0.3777	TRUE
		rs11764779	A	G	0.0189877	0.00280873	45.7	7.6e-12	-2.9635	4.0126	0.4602	TRUE
		rs12579995	G	A	-0.0213731	0.00277803	59.19	2.1e-14	-0.5674	3.6225	0.8755	TRUE
		rs12658060	T	C	0.0267679	0.00250903	113.82	9.5e-27	3.1511	3.1805	0.3218	TRUE
		rs13114613	G	C	-0.0154827	0.00246195	39.55	2.8e-10	-0.8087	3.2146	0.8014	TRUE
		rs13131880	T	C	0.0157722	0.00251714	39.26	2.3e-10	3.2673	3.2241	0.3109	TRUE
		rs1339157	T	C	0.0131669	0.00208996	39.69	6.4e-10	2.3167	2.719	0.3942	TRUE
		rs13400612	C	G	-0.0214908	0.00241859	78.96	1.1e-18	-1.7089	3.1286	0.5849	TRUE
		rs151174	C	T	0.0121016	0.00212199	32.52	6.8e-09	3.5999	2.853	0.207	TRUE
		rs16858942	G	C	-0.0174643	0.00272592	41.05	1.9e-10	7.6721	3.5284	0.02967	TRUE
		rs1726866	G	A	-0.0292427	0.00209503	194.83	7.5e-44	-0.2934	2.848	0.918	TRUE
		rs17805497	T	C	-0.0131236	0.00219019	35.9	2.3e-09	1.2522	2.8097	0.6558	TRUE
		rs1965024	G	A	0.0122508	0.0022117	30.68	3.7e-08	-0.3231	2.9052	0.9114	TRUE
		rs2339234	G	A	0.0164267	0.00224793	53.4	3.1e-13	6.7396	2.8697	0.01885	TRUE
		rs2463710	T	A	-0.0150494	0.00259388	33.66	1.3e-08	-1.1731	3.3588	0.7269	TRUE
		rs2687169	T	C	0.0170637	0.00220692	59.78	6.8e-15	-2.6982	2.7803	0.3318	TRUE
		rs2693687	C	T	-0.0131315	0.00215432	37.15	9.4e-10	-0.3252	2.799	0.9075	TRUE
		rs2704357	T	C	-0.0146996	0.00215437	46.56	5.2e-12	-1.9246	2.7801	0.4888	TRUE
		rs2736748	A	G	-0.0278861	0.00255891	118.76	4.6e-28	3.2543	3.3742	0.3348	TRUE
		rs28366151	C	T	0.0205449	0.00321726	40.78	1.5e-10	7.5302	4.9106	0.1252	TRUE
		rs2852348	A	G	0.0137974	0.00210334	43.03	4.1e-11	0.4051	2.6729	0.8795	TRUE
		rs2861885	C	A	-0.0181237	0.0032603	30.9	3.7e-08	-0.5645	4.1226	0.8911	TRUE
		rs2899548	C	T	0.0181775	0.00327743	30.76	1.8e-08	-4.1695	4.161	0.3163	TRUE
		rs329670	T	C	0.0181644	0.00311217	34.07	3.1e-09	4.1395	4.1572	0.3194	TRUE
		rs33137	C	T	0.0137515	0.00209755	42.98	6.9e-11	3.5462	2.7345	0.1947	TRUE
		rs34906832	A	G	-0.0170693	0.00298793	32.64	1.3e-08	5.8541	3.9173	0.1351	TRUE
		rs35099536	A	C	-0.0261379	0.00379331	47.48	6.8e-12	-4.738	4.9481	0.3383	TRUE
		rs35271178	C	T	-0.0117537	0.00211977	30.74	4.8e-08	-1.2889	2.7365	0.6376	TRUE
		rs35499833	G	C	0.0133987	0.00225411	35.33	4e-09	-3.0075	2.9358	0.3056	TRUE
		rs453585	G	A	-0.017296	0.00215153	64.62	4.5e-16	-0.8172	2.7185	0.7637	TRUE
		rs4601984	G	T	0.0123962	0.00218045	32.32	1.2e-08	0.3292	2.8071	0.9066	TRUE
		rs4708063	G	T	0.0121135	0.00208862	33.64	4.5e-09	1.4914	2.7198	0.5834	TRUE
		rs4739105	T	C	-0.0163205	0.00257873	40.05	3.1e-10	-1.0183	3.3412	0.7605	TRUE
		rs4856591	T	G	0.0185377	0.00218157	72.21	2.6e-17	4.1766	2.9666	0.1592	TRUE
		rs4948275	C	T	-0.0157797	0.00209757	56.59	7.8e-14	1.3488	2.7542	0.6243	TRUE
		rs4948441	G	A	0.0195402	0.00213729	83.59	8.9e-20	-0.6782	2.7611	0.806	TRUE
		rs4955432	C	T	0.0142249	0.00240822	34.89	4.4e-09	-2.279	2.7767	0.4118	TRUE
		rs4981196	A	C	0.0120799	0.00215689	31.37	2.1e-08	-2.4295	2.7744	0.3812	TRUE
		rs510901	T	C	0.0121888	0.00215053	32.12	1.3e-08	0.5023	2.7283	0.8539	TRUE
		rs528301	G	A	-0.0165867	0.00209508	62.68	1.4e-15	-7.7569	2.7298	0.00449	TRUE
		rs56407270	G	A	0.014201	0.00257829	30.34	3.1e-08	4.7447	3.2953	0.1499	TRUE
		rs58844557	C	T	0.0148977	0.00261238	32.52	1.7e-08	-2.2569	3.6519	0.5366	TRUE
		rs62098445	C	A	0.0169758	0.00226302	56.27	3.9e-14	0.9213	2.9838	0.7575	TRUE
		rs62183023	C	T	-0.0134574	0.00227623	34.95	1.9e-09	1.7846	3.0891	0.5635	TRUE
		rs6443950	A	T	0.0133417	0.00216562	37.95	1.2e-09	1.0799	2.8974	0.7094	TRUE
		rs6887291	T	G	-0.0152731	0.00217546	49.29	2.3e-12	2.6694	2.8252	0.3447	TRUE
		rs6958837	A	C	0.0191568	0.00349031	30.12	4.3e-08	2.6741	4.3808	0.5416	TRUE
		rs73544827	C	G	-0.0169107	0.00305664	30.61	2.9e-08	-9.285	4.0875	0.02311	TRUE
		rs7591518	T	C	0.0219329	0.00228402	92.21	5.5e-22	1.1867	2.9231	0.6848	TRUE
		rs80253017	T	C	0.0252667	0.00443938	32.39	7.6e-09	1.0583	5.7499	0.854	TRUE
		rs803375	G	T	-0.018341	0.00214703	72.97	1.4e-17	1.2438	2.7654	0.6529	TRUE
		rs868720	G	C	-0.0160109	0.00228043	49.29	1.9e-12	-4.6687	2.9166	0.1094	TRUE
		rs925946	T	G	0.0127094	0.0022456	32.03	1e-08	-2.1676	2.8892	0.4531	TRUE
		rs9278020	G	A	-0.0236212	0.00339732	48.34	2.2e-12	-4.9414	5.674	0.3838	TRUE
		rs9401250	C	T	0.0116843	0.00209375	31.14	1.9e-08	-3.5991	2.7231	0.1863	TRUE
		rs951901	C	A	0.0123009	0.00220097	31.24	2.2e-08	-0.7514	2.8693	0.7934	TRUE
		rs9852600	C	T	-0.020718	0.00276319	56.22	7.7e-14	-1.4057	3.6287	0.6985	TRUE
		rs9971382	G	T	-0.0167701	0.00208898	64.45	8e-16	1.2428	2.6641	0.6409	TRUE
doyouaddsalt	THICK_supramarginal	rs1008078	C	T	-0.012173	0.0021364	32.47	1.7e-08	-0.0001	0.0007	0.8715	TRUE
		rs1025132	G	A	0.0124913	0.00212321	34.61	1.7e-09	-0.0016	0.0007	0.02567	TRUE
		rs10410950	G	A	0.0260306	0.00480052	29.4	3.3e-08	0.0005	0.0016	0.7574	TRUE
		rs1045411	C	T	0.0141751	0.00235733	36.16	2.8e-09	0.0025	0.0008	0.001922	TRUE
		rs10484759	C	T	-0.0135257	0.00240944	31.51	2.6e-08	-0.0016	0.0008	0.05497	TRUE
		rs10736951	G	C	0.0139776	0.00218118	41.07	1.2e-10	0.0005	0.0007	0.4843	TRUE
		rs10752999	A	C	-0.0153999	0.00227963	45.64	9.6e-12	-0.0021	0.0008	0.007168	TRUE
		rs10971930	T	C	-0.0173451	0.00313086	30.69	4.2e-08	-0.0007	0.001	0.5156	TRUE
		rs11764779	A	G	0.0189877	0.00280873	45.7	7.6e-12	0.0005	0.0011	0.6465	TRUE
		rs12579995	G	A	-0.0213731	0.00277803	59.19	2.1e-14	0.0009	0.0009	0.343	TRUE
		rs12658060	T	C	0.0267679	0.00250903	113.82	9.5e-27	0.0002	0.0008	0.7756	TRUE
		rs13114613	G	C	-0.0154827	0.00246195	39.55	2.8e-10	0.0021	0.0008	0.01328	TRUE
		rs13131880	T	C	0.0157722	0.00251714	39.26	2.3e-10	0.0012	0.0008	0.1637	TRUE
		rs1339157	T	C	0.0131669	0.00208996	39.69	6.4e-10	0.0001	0.0007	0.9296	TRUE
		rs13400612	C	G	-0.0214908	0.00241859	78.96	1.1e-18	-0.0003	0.0008	0.7357	TRUE
		rs151174	C	T	0.0121016	0.00212199	32.52	6.8e-09	0.0006	0.0007	0.383	TRUE
		rs16858942	G	C	-0.0174643	0.00272592	41.05	1.9e-10	0	0.0009	0.9874	TRUE
		rs1726866	G	A	-0.0292427	0.00209503	194.83	7.5e-44	0.0003	0.0007	0.7113	TRUE
		rs17805497	T	C	-0.0131236	0.00219019	35.9	2.3e-09	-0.0002	0.0007	0.7619	TRUE
		rs1965024	G	A	0.0122508	0.0022117	30.68	3.7e-08	0.0011	0.0008	0.1535	TRUE
		rs2339234	G	A	0.0164267	0.00224793	53.4	3.1e-13	0.0009	0.0007	0.2096	TRUE
		rs2463710	T	A	-0.0150494	0.00259388	33.66	1.3e-08	0.0005	0.0009	0.5815	TRUE
		rs2687169	T	C	0.0170637	0.00220692	59.78	6.8e-15	0.0005	0.0007	0.4996	TRUE
		rs2693687	C	T	-0.0131315	0.00215432	37.15	9.4e-10	-0.0003	0.0007	0.7274	TRUE
		rs2704357	T	C	-0.0146996	0.00215437	46.56	5.2e-12	-0.0004	0.0007	0.5408	TRUE
		rs2736748	A	G	-0.0278861	0.00255891	118.76	4.6e-28	-0.0003	0.0009	0.7646	TRUE
		rs28366151	C	T	0.0205449	0.00321726	40.78	1.5e-10	-0.0015	0.0013	0.2299	TRUE
		rs2852348	A	G	0.0137974	0.00210334	43.03	4.1e-11	0.0003	0.0007	0.6762	TRUE
		rs2861885	C	A	-0.0181237	0.0032603	30.9	3.7e-08	-0.0022	0.0011	0.04465	TRUE
		rs2899548	C	T	0.0181775	0.00327743	30.76	1.8e-08	-0.0009	0.0011	0.395	TRUE
		rs329670	T	C	0.0181644	0.00311217	34.07	3.1e-09	0.0006	0.0011	0.5852	TRUE
		rs33137	C	T	0.0137515	0.00209755	42.98	6.9e-11	0	0.0007	0.9585	TRUE
		rs34906832	A	G	-0.0170693	0.00298793	32.64	1.3e-08	-0.0022	0.001	0.03432	TRUE
		rs35099536	A	C	-0.0261379	0.00379331	47.48	6.8e-12	-0.0041	0.0013	0.001789	TRUE
		rs35271178	C	T	-0.0117537	0.00211977	30.74	4.8e-08	0	0.0007	0.9843	TRUE
		rs35499833	G	C	0.0133987	0.00225411	35.33	4e-09	0.0008	0.0008	0.2929	TRUE
		rs453585	G	A	-0.017296	0.00215153	64.62	4.5e-16	-0.0008	0.0007	0.2661	TRUE
		rs4601984	G	T	0.0123962	0.00218045	32.32	1.2e-08	0.0005	0.0007	0.4764	TRUE
		rs4708063	G	T	0.0121135	0.00208862	33.64	4.5e-09	-0.0007	0.0007	0.3264	TRUE
		rs4739105	T	C	-0.0163205	0.00257873	40.05	3.1e-10	-0.0009	0.0009	0.3036	TRUE
		rs4856591	T	G	0.0185377	0.00218157	72.21	2.6e-17	0.0006	0.0008	0.4431	TRUE
		rs4948275	C	T	-0.0157797	0.00209757	56.59	7.8e-14	-0.0006	0.0007	0.3873	TRUE
		rs4948441	G	A	0.0195402	0.00213729	83.59	8.9e-20	0.0004	0.0007	0.5649	TRUE
		rs4955432	C	T	0.0142249	0.00240822	34.89	4.4e-09	0.0001	0.0007	0.8787	TRUE
		rs4981196	A	C	0.0120799	0.00215689	31.37	2.1e-08	-0.0011	0.0007	0.1313	TRUE
		rs510901	T	C	0.0121888	0.00215053	32.12	1.3e-08	0	0.0007	0.9593	TRUE
		rs528301	G	A	-0.0165867	0.00209508	62.68	1.4e-15	-0.0009	0.0007	0.2269	TRUE
		rs56407270	G	A	0.014201	0.00257829	30.34	3.1e-08	0.0003	0.0009	0.744	TRUE
		rs58844557	C	T	0.0148977	0.00261238	32.52	1.7e-08	-0.0009	0.001	0.3354	TRUE
		rs62098445	C	A	0.0169758	0.00226302	56.27	3.9e-14	-0.0002	0.0008	0.7614	TRUE
		rs62183023	C	T	-0.0134574	0.00227623	34.95	1.9e-09	0	0.0008	0.9591	TRUE
		rs6443950	A	T	0.0133417	0.00216562	37.95	1.2e-09	-0.0001	0.0007	0.8897	TRUE
		rs6887291	T	G	-0.0152731	0.00217546	49.29	2.3e-12	0.0004	0.0007	0.5674	TRUE
		rs6958837	A	C	0.0191568	0.00349031	30.12	4.3e-08	0.0006	0.0011	0.601	TRUE
		rs73544827	C	G	-0.0169107	0.00305664	30.61	2.9e-08	0.0012	0.0011	0.2546	TRUE
		rs7591518	T	C	0.0219329	0.00228402	92.21	5.5e-22	-0.001	0.0008	0.2097	TRUE
		rs80253017	T	C	0.0252667	0.00443938	32.39	7.6e-09	0.0014	0.0015	0.3555	TRUE
		rs803375	G	T	-0.018341	0.00214703	72.97	1.4e-17	-0.0006	0.0007	0.441	TRUE
		rs868720	G	C	-0.0160109	0.00228043	49.29	1.9e-12	0.0006	0.0008	0.3958	TRUE
		rs925946	T	G	0.0127094	0.0022456	32.03	1e-08	0.0005	0.0007	0.4997	TRUE
		rs9278020	G	A	-0.0236212	0.00339732	48.34	2.2e-12	-0.0014	0.0015	0.355	TRUE
		rs9401250	C	T	0.0116843	0.00209375	31.14	1.9e-08	-0.0005	0.0007	0.4395	TRUE
		rs951901	C	A	0.0123009	0.00220097	31.24	2.2e-08	0.0016	0.0007	0.031	TRUE
		rs9852600	C	T	-0.020718	0.00276319	56.22	7.7e-14	0.0001	0.0009	0.9485	TRUE
		rs9971382	G	T	-0.0167701	0.00208898	64.45	8e-16	0.0007	0.0007	0.2957	TRUE
freshfruit_piecesperday	THICK_frontalpole	rs10013628	G	T	-0.0119748	0.00211959	31.92	2.2e-08	0.0009	0.0022	0.6919	TRUE
		rs10064431	T	C	0.0121739	0.00209611	33.73	9e-09	-0.0001	0.0022	0.9521	TRUE
		rs10128597	G	A	-0.0151747	0.00235557	41.5	2e-10	-0.0013	0.0022	0.5685	TRUE
		rs10163879	G	A	-0.0179807	0.00213579	70.88	4.1e-17	-0.0002	0.002	0.939	TRUE
		rs10192394	C	T	0.0134182	0.00210142	40.77	1.9e-10	-0.001	0.0021	0.6443	TRUE
		rs10249294	G	A	-0.0367825	0.00215984	290.03	5.7e-65	-0.0006	0.0021	0.7896	TRUE
		rs10407367	A	C	0.0117779	0.00217373	29.36	4.6e-08	-0.0059	0.0022	0.008424	TRUE
		rs10490869	A	T	0.014723	0.00257685	32.64	1.1e-08	0.0001	0.0024	0.9661	TRUE
		rs10504754	G	A	-0.0121935	0.00219771	30.78	2.3e-08	0.0038	0.0021	0.06056	TRUE
		rs10828266	A	G	-0.0258864	0.00232405	124.07	1.3e-28	0.0012	0.0022	0.5996	TRUE
		rs11032362	G	A	-0.0237924	0.00363423	42.86	3.2e-11	0.0003	0.0037	0.9286	TRUE
		rs11039265	C	A	-0.016661	0.00219129	57.81	2.7e-14	-0.0026	0.0022	0.2274	TRUE
		rs111526888	A	G	-0.0189483	0.00232811	66.24	4.5e-16	-0.0007	0.0022	0.7572	TRUE
		rs111915841	G	C	-0.0139639	0.00224416	38.72	5.6e-10	0.0024	0.0022	0.2695	TRUE
		rs1148672	G	A	0.0131084	0.00217512	36.32	1.3e-09	0.0007	0.0021	0.7435	TRUE
		rs115067791	G	A	-0.0273261	0.00452142	36.53	1.5e-09	0.0044	0.0049	0.3671	TRUE
		rs115540638	A	T	0.0181221	0.00253205	51.22	1.5e-12	0.0012	0.0028	0.6737	TRUE
		rs11581076	C	T	-0.0116981	0.00212363	30.34	3.5e-08	-0.0039	0.0022	0.07246	TRUE
		rs12196849	C	A	-0.0130063	0.00217291	35.83	1.9e-09	-0.0032	0.0021	0.1381	TRUE
		rs12536253	G	C	0.0151918	0.00242356	39.29	3.2e-10	0.0012	0.0025	0.614	TRUE
		rs12784301	A	G	-0.0141457	0.00230953	37.51	8.7e-10	-0.0012	0.0024	0.6009	TRUE
		rs12885598	G	A	-0.0131298	0.00213442	37.84	1.5e-09	-0.0004	0.0021	0.8396	TRUE
		rs12933575	A	G	-0.013245	0.00209552	39.95	2.5e-10	-0.0037	0.0021	0.07047	TRUE
		rs12986222	T	C	0.0130176	0.00214948	36.68	1.4e-09	-0.0039	0.0031	0.2092	TRUE
		rs13064579	C	T	-0.0122003	0.0021631	31.81	1.3e-08	0.0019	0.0021	0.344	TRUE
		rs1328600	C	A	-0.0123173	0.00214166	33.08	8.3e-09	0.0004	0.0021	0.8503	TRUE
		rs140865897	C	T	0.0123569	0.00222856	30.74	1.8e-08	0.0018	0.0022	0.3966	TRUE
		rs1460255	T	C	0.0129153	0.00219401	34.65	2.8e-09	0.0003	0.0021	0.8705	TRUE
		rs1556623	G	A	0.0116887	0.00210762	30.76	3.1e-08	-0.0005	0.002	0.7965	TRUE
		rs1620977	A	G	0.0246378	0.00235785	109.19	3e-25	0.0047	0.0024	0.04912	TRUE
		rs17359991	G	C	-0.0250248	0.00413919	36.55	2.9e-09	0.0014	0.0041	0.739	TRUE
		rs1827913	G	A	-0.0124577	0.00223403	31.1	3.1e-08	-0.0026	0.0021	0.2096	TRUE
		rs1964272	G	A	-0.0164098	0.00209275	61.49	8.4e-15	-0.0027	0.0021	0.2062	TRUE
		rs2326319	G	A	0.0149317	0.00218474	46.71	1.1e-11	0.0018	0.0021	0.3869	TRUE
		rs2370982	C	T	-0.0216357	0.00256334	71.24	2.7e-17	-0.0014	0.0025	0.5687	TRUE
		rs2425836	A	G	-0.0119616	0.00212513	31.68	1.6e-08	0.0008	0.002	0.6988	TRUE
		rs2432801	G	A	0.0130398	0.00233795	31.11	1.6e-08	-0.0048	0.0023	0.04029	TRUE
		rs2472297	C	T	0.0158941	0.00237284	44.87	1.6e-11	0.0024	0.0024	0.3126	TRUE
		rs2504671	C	A	-0.0255358	0.00247341	106.59	5.4e-25	-0.0017	0.0023	0.4714	TRUE
		rs2578697	T	C	-0.0134675	0.00208636	41.67	1e-10	0.0022	0.002	0.2715	TRUE
		rs2790688	C	T	-0.0209061	0.00289759	52.06	2.3e-13	0.0019	0.0029	0.5215	TRUE
		rs2915859	C	T	-0.0121425	0.00219487	30.61	3.6e-08	0.0017	0.0022	0.4357	TRUE
		rs2922629	T	G	-0.011658	0.00214399	29.57	4.9e-08	-0.001	0.0021	0.6244	TRUE
		rs329274	A	G	-0.0148839	0.00209969	50.25	1.3e-12	-0.0005	0.002	0.7907	TRUE
		rs34162196	C	T	0.0348287	0.00346835	100.84	5.1e-24	-0.0036	0.0035	0.3011	TRUE
		rs4141843	A	T	0.0155953	0.00221025	49.79	1.9e-12	0.0011	0.0022	0.5983	TRUE
		rs4343305	A	G	0.0127093	0.00213384	35.47	2.2e-09	0.0027	0.002	0.1846	TRUE
		rs4655962	C	T	0.0127195	0.0021697	34.37	3.7e-09	0.0003	0.0022	0.8714	TRUE
		rs4953150	C	T	0.0184727	0.00221042	69.84	7.6e-17	0.0004	0.0021	0.837	TRUE
		rs559734	G	C	-0.0132855	0.00232478	32.66	7.8e-09	-0.0028	0.0023	0.2249	TRUE
		rs60452247	G	A	-0.0140144	0.00217018	41.7	8.2e-11	-0.0015	0.0021	0.4695	TRUE
		rs6475725	T	G	-0.0141887	0.00239913	34.98	2.6e-09	-0.0007	0.0023	0.7765	TRUE
		rs6548237	A	C	-0.0197009	0.00275974	50.96	6.9e-13	-0.0006	0.0027	0.8379	TRUE
		rs664544	C	T	0.0122883	0.00222574	30.48	2e-08	0.0021	0.0021	0.3215	TRUE
		rs6868457	T	C	-0.0138515	0.00210148	43.45	3e-11	-0.0026	0.002	0.1894	TRUE
		rs6961517	G	T	0.0141868	0.00227982	38.72	6.7e-10	0.0035	0.0022	0.1078	TRUE
		rs7093561	G	A	-0.0178909	0.00325371	30.23	3.2e-08	-0.008	0.0034	0.01838	TRUE
		rs721575	C	T	0.0117891	0.00210358	31.41	2.5e-08	0.0004	0.0021	0.8581	TRUE
		rs739320	T	C	0.017667	0.0021895	65.11	6.2e-16	0.0091	0.0032	0.004951	TRUE
		rs7554485	T	C	0.0140767	0.00214451	43.09	5.7e-11	-0.0005	0.002	0.7903	TRUE
		rs7647305	T	C	-0.0157347	0.00255272	37.99	3.9e-10	0.0024	0.0025	0.3351	TRUE
		rs769449	G	A	-0.0202374	0.00315476	41.15	1e-10	-0.0003	0.0031	0.9186	TRUE
		rs7818437	T	C	0.017988	0.00248437	52.42	2.8e-13	0.0001	0.0024	0.9673	TRUE
		rs7849142	G	T	-0.0146676	0.00221736	43.76	4.9e-11	-0.0009	0.0021	0.6621	TRUE
		rs7869969	A	G	-0.0141271	0.00222104	40.46	2e-10	0.0014	0.0021	0.4999	TRUE
		rs7898861	T	C	0.0133985	0.00209308	40.98	9.8e-11	0.0035	0.002	0.07977	TRUE
		rs7969091	A	G	-0.0119566	0.00211189	32.05	1.8e-08	0.001	0.002	0.6059	TRUE
		rs7982441	T	C	0.013647	0.00235511	33.58	6.3e-09	0.0006	0.0023	0.7762	TRUE
		rs8045829	T	G	0.0131216	0.00214736	37.34	1e-09	0.0005	0.0021	0.8082	TRUE
		rs8095324	A	G	0.0125095	0.00213686	34.27	2.5e-09	0.0017	0.0021	0.4162	TRUE
		rs817223	T	C	0.0132308	0.00209068	40.05	1.9e-10	-0.0021	0.002	0.281	TRUE
		rs826596	G	A	-0.0124791	0.00221455	31.75	2.6e-08	-0.0003	0.0021	0.8892	TRUE
		rs862227	A	G	0.0177785	0.00209504	72.01	1.4e-17	0.0017	0.0021	0.406	TRUE
		rs9517948	C	T	-0.0131224	0.00210918	38.71	3.1e-10	-0.0024	0.002	0.2356	TRUE
		rs9635715	T	C	-0.0119094	0.00210988	31.86	1.6e-08	0.0015	0.0022	0.495	TRUE
freshfruit_piecesperday	THICK_inferiortemporal	rs10013628	G	T	-0.0119748	0.00211959	31.92	2.2e-08	-0.0002	0.0011	0.8805	TRUE
		rs10064431	T	C	0.0121739	0.00209611	33.73	9e-09	-0.0004	0.0011	0.7238	TRUE
		rs10128597	G	A	-0.0151747	0.00235557	41.5	2e-10	-0.0008	0.0011	0.464	TRUE
		rs10163879	G	A	-0.0179807	0.00213579	70.88	4.1e-17	0.0009	0.001	0.3524	TRUE
		rs10192394	C	T	0.0134182	0.00210142	40.77	1.9e-10	-0.0015	0.0011	0.1494	TRUE
		rs10249294	G	A	-0.0367825	0.00215984	290.03	5.7e-65	-0.0006	0.001	0.5721	TRUE
		rs10407367	A	C	0.0117779	0.00217373	29.36	4.6e-08	0.0002	0.0011	0.8393	TRUE
		rs10490869	A	T	0.014723	0.00257685	32.64	1.1e-08	0.0013	0.0012	0.2829	TRUE
		rs10504754	G	A	-0.0121935	0.00219771	30.78	2.3e-08	0.0007	0.001	0.4857	TRUE
		rs10828266	A	G	-0.0258864	0.00232405	124.07	1.3e-28	0.0006	0.0011	0.5756	TRUE
		rs11032362	G	A	-0.0237924	0.00363423	42.86	3.2e-11	0.0001	0.0018	0.9741	TRUE
		rs11039265	C	A	-0.016661	0.00219129	57.81	2.7e-14	-0.0012	0.0011	0.2531	TRUE
		rs111526888	A	G	-0.0189483	0.00232811	66.24	4.5e-16	-0.0001	0.0011	0.928	TRUE
		rs111915841	G	C	-0.0139639	0.00224416	38.72	5.6e-10	0.0017	0.0011	0.1221	TRUE
		rs1148672	G	A	0.0131084	0.00217512	36.32	1.3e-09	-0.001	0.0011	0.3514	TRUE
		rs115067791	G	A	-0.0273261	0.00452142	36.53	1.5e-09	0.0036	0.0024	0.144	TRUE
		rs115540638	A	T	0.0181221	0.00253205	51.22	1.5e-12	-0.0023	0.0014	0.0946	TRUE
		rs11581076	C	T	-0.0116981	0.00212363	30.34	3.5e-08	0.0013	0.0011	0.2313	TRUE
		rs12196849	C	A	-0.0130063	0.00217291	35.83	1.9e-09	0.0032	0.0011	0.002354	TRUE
		rs12536253	G	C	0.0151918	0.00242356	39.29	3.2e-10	-0.0003	0.0012	0.7965	TRUE
		rs12784301	A	G	-0.0141457	0.00230953	37.51	8.7e-10	0.0007	0.0012	0.5719	TRUE
		rs12885598	G	A	-0.0131298	0.00213442	37.84	1.5e-09	-0.0023	0.001	0.02845	TRUE
		rs12933575	A	G	-0.013245	0.00209552	39.95	2.5e-10	0.0028	0.001	0.007047	TRUE
		rs12986222	T	C	0.0130176	0.00214948	36.68	1.4e-09	0.0004	0.0016	0.7928	TRUE
		rs13064579	C	T	-0.0122003	0.0021631	31.81	1.3e-08	-0.0006	0.001	0.5594	TRUE
		rs1328600	C	A	-0.0123173	0.00214166	33.08	8.3e-09	0.0009	0.001	0.394	TRUE
		rs140865897	C	T	0.0123569	0.00222856	30.74	1.8e-08	0.0008	0.0011	0.4642	TRUE
		rs1460255	T	C	0.0129153	0.00219401	34.65	2.8e-09	0.0018	0.0011	0.09469	TRUE
		rs1556623	G	A	0.0116887	0.00210762	30.76	3.1e-08	-0.0012	0.001	0.2546	TRUE
		rs1620977	A	G	0.0246378	0.00235785	109.19	3e-25	-0.0003	0.0012	0.7927	TRUE
		rs17359991	G	C	-0.0250248	0.00413919	36.55	2.9e-09	-0.0001	0.0021	0.9768	TRUE
		rs1827913	G	A	-0.0124577	0.00223403	31.1	3.1e-08	0.001	0.001	0.3503	TRUE
		rs1964272	G	A	-0.0164098	0.00209275	61.49	8.4e-15	-0.0012	0.0011	0.2748	TRUE
		rs2326319	G	A	0.0149317	0.00218474	46.71	1.1e-11	-0.0003	0.001	0.8045	TRUE
		rs2370982	C	T	-0.0216357	0.00256334	71.24	2.7e-17	0.0011	0.0012	0.3661	TRUE
		rs2425836	A	G	-0.0119616	0.00212513	31.68	1.6e-08	0.0015	0.001	0.1361	TRUE
		rs2432801	G	A	0.0130398	0.00233795	31.11	1.6e-08	0.0007	0.0012	0.544	TRUE
		rs2472297	C	T	0.0158941	0.00237284	44.87	1.6e-11	-0.0005	0.0012	0.6811	TRUE
		rs2504671	C	A	-0.0255358	0.00247341	106.59	5.4e-25	0.0022	0.0012	0.05701	TRUE
		rs2578697	T	C	-0.0134675	0.00208636	41.67	1e-10	0.0002	0.001	0.8763	TRUE
		rs2790688	C	T	-0.0209061	0.00289759	52.06	2.3e-13	-0.0012	0.0015	0.4274	TRUE
		rs2915859	C	T	-0.0121425	0.00219487	30.61	3.6e-08	0.0015	0.0011	0.1707	TRUE
		rs2922629	T	G	-0.011658	0.00214399	29.57	4.9e-08	0.0008	0.001	0.462	TRUE
		rs329274	A	G	-0.0148839	0.00209969	50.25	1.3e-12	0.0003	0.001	0.7604	TRUE
		rs34162196	C	T	0.0348287	0.00346835	100.84	5.1e-24	-0.0007	0.0017	0.7084	TRUE
		rs4141843	A	T	0.0155953	0.00221025	49.79	1.9e-12	0.0001	0.0011	0.8896	TRUE
		rs4343305	A	G	0.0127093	0.00213384	35.47	2.2e-09	0.0004	0.001	0.6891	TRUE
		rs4655962	C	T	0.0127195	0.0021697	34.37	3.7e-09	0.0008	0.0011	0.4677	TRUE
		rs4953150	C	T	0.0184727	0.00221042	69.84	7.6e-17	0.0011	0.0011	0.2939	TRUE
		rs559734	G	C	-0.0132855	0.00232478	32.66	7.8e-09	-0.0002	0.0012	0.8436	TRUE
		rs60452247	G	A	-0.0140144	0.00217018	41.7	8.2e-11	0.0001	0.001	0.8951	TRUE
		rs6475725	T	G	-0.0141887	0.00239913	34.98	2.6e-09	-0.0001	0.0012	0.9397	TRUE
		rs6548237	A	C	-0.0197009	0.00275974	50.96	6.9e-13	0	0.0013	0.9749	TRUE
		rs664544	C	T	0.0122883	0.00222574	30.48	2e-08	-0.0009	0.0011	0.4149	TRUE
		rs6868457	T	C	-0.0138515	0.00210148	43.45	3e-11	-0.0009	0.001	0.352	TRUE
		rs6961517	G	T	0.0141868	0.00227982	38.72	6.7e-10	0.0002	0.0011	0.8235	TRUE
		rs7093561	G	A	-0.0178909	0.00325371	30.23	3.2e-08	0.0016	0.0017	0.3441	TRUE
		rs721575	C	T	0.0117891	0.00210358	31.41	2.5e-08	-0.0002	0.0011	0.8268	TRUE
		rs739320	T	C	0.017667	0.0021895	65.11	6.2e-16	-0.0014	0.0016	0.3701	TRUE
		rs7554485	T	C	0.0140767	0.00214451	43.09	5.7e-11	0.0007	0.001	0.4847	TRUE
		rs7647305	T	C	-0.0157347	0.00255272	37.99	3.9e-10	0.0022	0.0012	0.07722	TRUE
		rs769449	G	A	-0.0202374	0.00315476	41.15	1e-10	0.0032	0.0016	0.04358	TRUE
		rs7818437	T	C	0.017988	0.00248437	52.42	2.8e-13	-0.0004	0.0012	0.7465	TRUE
		rs7849142	G	T	-0.0146676	0.00221736	43.76	4.9e-11	0.0005	0.001	0.6475	TRUE
		rs7869969	A	G	-0.0141271	0.00222104	40.46	2e-10	-0.0008	0.0011	0.4659	TRUE
		rs7898861	T	C	0.0133985	0.00209308	40.98	9.8e-11	0.0011	0.001	0.2535	TRUE
		rs7969091	A	G	-0.0119566	0.00211189	32.05	1.8e-08	0.0007	0.001	0.4616	TRUE
		rs7982441	T	C	0.013647	0.00235511	33.58	6.3e-09	-0.0003	0.0011	0.7637	TRUE
		rs8045829	T	G	0.0131216	0.00214736	37.34	1e-09	0.0013	0.001	0.2059	TRUE
		rs8095324	A	G	0.0125095	0.00213686	34.27	2.5e-09	0.0021	0.001	0.0412	TRUE
		rs817223	T	C	0.0132308	0.00209068	40.05	1.9e-10	-0.0007	0.001	0.4974	TRUE
		rs826596	G	A	-0.0124791	0.00221455	31.75	2.6e-08	0.003	0.0011	0.004929	TRUE
		rs862227	A	G	0.0177785	0.00209504	72.01	1.4e-17	-0.0007	0.001	0.4923	TRUE
		rs9517948	C	T	-0.0131224	0.00210918	38.71	3.1e-10	0.0001	0.001	0.9086	TRUE
		rs9635715	T	C	-0.0119094	0.00210988	31.86	1.6e-08	0.0002	0.0011	0.8479	TRUE
freshfruit_piecesperday	THICK_insula	rs10013628	G	T	-0.0119748	0.00211959	31.92	2.2e-08	0.0028	0.0012	0.01814	TRUE
		rs10064431	T	C	0.0121739	0.00209611	33.73	9e-09	-0.0009	0.0012	0.4533	TRUE
		rs10128597	G	A	-0.0151747	0.00235557	41.5	2e-10	0	0.0012	0.9752	TRUE
		rs10163879	G	A	-0.0179807	0.00213579	70.88	4.1e-17	0.0006	0.0011	0.5823	TRUE
		rs10192394	C	T	0.0134182	0.00210142	40.77	1.9e-10	-0.0001	0.0012	0.9058	TRUE
		rs10249294	G	A	-0.0367825	0.00215984	290.03	5.7e-65	-0.0022	0.0011	0.05446	TRUE
		rs10407367	A	C	0.0117779	0.00217373	29.36	4.6e-08	-0.0015	0.0012	0.218	TRUE
		rs10490869	A	T	0.014723	0.00257685	32.64	1.1e-08	0.0029	0.0013	0.02799	TRUE
		rs10504754	G	A	-0.0121935	0.00219771	30.78	2.3e-08	-0.0009	0.0011	0.4267	TRUE
		rs10828266	A	G	-0.0258864	0.00232405	124.07	1.3e-28	-0.0006	0.0012	0.6119	TRUE
		rs11032362	G	A	-0.0237924	0.00363423	42.86	3.2e-11	-0.0021	0.002	0.2889	TRUE
		rs11039265	C	A	-0.016661	0.00219129	57.81	2.7e-14	-0.0001	0.0012	0.9016	TRUE
		rs111526888	A	G	-0.0189483	0.00232811	66.24	4.5e-16	-0.0003	0.0012	0.8059	TRUE
		rs111915841	G	C	-0.0139639	0.00224416	38.72	5.6e-10	0.0013	0.0012	0.2978	TRUE
		rs1148672	G	A	0.0131084	0.00217512	36.32	1.3e-09	0.0024	0.0012	0.03853	TRUE
		rs115067791	G	A	-0.0273261	0.00452142	36.53	1.5e-09	-0.0044	0.0027	0.1028	TRUE
		rs115540638	A	T	0.0181221	0.00253205	51.22	1.5e-12	0.0015	0.0015	0.3392	TRUE
		rs11581076	C	T	-0.0116981	0.00212363	30.34	3.5e-08	-0.0011	0.0012	0.3743	TRUE
		rs12196849	C	A	-0.0130063	0.00217291	35.83	1.9e-09	-0.002	0.0012	0.08014	TRUE
		rs12536253	G	C	0.0151918	0.00242356	39.29	3.2e-10	0.0017	0.0014	0.2146	TRUE
		rs12784301	A	G	-0.0141457	0.00230953	37.51	8.7e-10	-0.0001	0.0013	0.954	TRUE
		rs12885598	G	A	-0.0131298	0.00213442	37.84	1.5e-09	-0.0002	0.0011	0.8765	TRUE
		rs12933575	A	G	-0.013245	0.00209552	39.95	2.5e-10	0.0005	0.0011	0.6777	TRUE
		rs12986222	T	C	0.0130176	0.00214948	36.68	1.4e-09	-0.0004	0.0017	0.8007	TRUE
		rs13064579	C	T	-0.0122003	0.0021631	31.81	1.3e-08	0.001	0.0011	0.3905	TRUE
		rs1328600	C	A	-0.0123173	0.00214166	33.08	8.3e-09	0.0016	0.0011	0.1546	TRUE
		rs140865897	C	T	0.0123569	0.00222856	30.74	1.8e-08	0.0006	0.0012	0.6141	TRUE
		rs1460255	T	C	0.0129153	0.00219401	34.65	2.8e-09	-0.0007	0.0012	0.5721	TRUE
		rs1556623	G	A	0.0116887	0.00210762	30.76	3.1e-08	0.0005	0.0011	0.6765	TRUE
		rs1620977	A	G	0.0246378	0.00235785	109.19	3e-25	0.0011	0.0013	0.4052	TRUE
		rs17359991	G	C	-0.0250248	0.00413919	36.55	2.9e-09	-0.0024	0.0023	0.2956	TRUE
		rs1827913	G	A	-0.0124577	0.00223403	31.1	3.1e-08	0	0.0011	0.9856	TRUE
		rs1964272	G	A	-0.0164098	0.00209275	61.49	8.4e-15	0.0014	0.0012	0.2237	TRUE
		rs2326319	G	A	0.0149317	0.00218474	46.71	1.1e-11	-0.0003	0.0012	0.7728	TRUE
		rs2370982	C	T	-0.0216357	0.00256334	71.24	2.7e-17	0	0.0013	0.9923	TRUE
		rs2425836	A	G	-0.0119616	0.00212513	31.68	1.6e-08	0.0003	0.0011	0.8023	TRUE
		rs2432801	G	A	0.0130398	0.00233795	31.11	1.6e-08	0.0013	0.0013	0.2922	TRUE
		rs2472297	C	T	0.0158941	0.00237284	44.87	1.6e-11	0.0029	0.0013	0.02461	TRUE
		rs2504671	C	A	-0.0255358	0.00247341	106.59	5.4e-25	0.0005	0.0013	0.6856	TRUE
		rs2578697	T	C	-0.0134675	0.00208636	41.67	1e-10	-0.0009	0.0011	0.4147	TRUE
		rs2790688	C	T	-0.0209061	0.00289759	52.06	2.3e-13	-0.0014	0.0016	0.3953	TRUE
		rs2915859	C	T	-0.0121425	0.00219487	30.61	3.6e-08	-0.0032	0.0012	0.006391	TRUE
		rs2922629	T	G	-0.011658	0.00214399	29.57	4.9e-08	0.0007	0.0011	0.531	TRUE
		rs329274	A	G	-0.0148839	0.00209969	50.25	1.3e-12	-0.0016	0.0011	0.165	TRUE
		rs34162196	C	T	0.0348287	0.00346835	100.84	5.1e-24	-0.0021	0.0019	0.2792	TRUE
		rs4141843	A	T	0.0155953	0.00221025	49.79	1.9e-12	0.0005	0.0012	0.6526	TRUE
		rs4343305	A	G	0.0127093	0.00213384	35.47	2.2e-09	0.0026	0.0011	0.0195	TRUE
		rs4655962	C	T	0.0127195	0.0021697	34.37	3.7e-09	0.0041	0.0012	0.0004762	TRUE
		rs4953150	C	T	0.0184727	0.00221042	69.84	7.6e-17	0.0002	0.0012	0.8444	TRUE
		rs559734	G	C	-0.0132855	0.00232478	32.66	7.8e-09	-0.0008	0.0013	0.513	TRUE
		rs60452247	G	A	-0.0140144	0.00217018	41.7	8.2e-11	-0.0016	0.0011	0.1565	TRUE
		rs6475725	T	G	-0.0141887	0.00239913	34.98	2.6e-09	-0.0014	0.0013	0.2747	TRUE
		rs6548237	A	C	-0.0197009	0.00275974	50.96	6.9e-13	-0.0032	0.0015	0.03086	TRUE
		rs664544	C	T	0.0122883	0.00222574	30.48	2e-08	-0.0004	0.0012	0.7402	TRUE
		rs6868457	T	C	-0.0138515	0.00210148	43.45	3e-11	-0.0022	0.0011	0.04714	TRUE
		rs6961517	G	T	0.0141868	0.00227982	38.72	6.7e-10	-0.0007	0.0012	0.5452	TRUE
		rs7093561	G	A	-0.0178909	0.00325371	30.23	3.2e-08	-0.0012	0.0019	0.5247	TRUE
		rs721575	C	T	0.0117891	0.00210358	31.41	2.5e-08	0.0016	0.0012	0.1743	TRUE
		rs7554485	T	C	0.0140767	0.00214451	43.09	5.7e-11	0.0001	0.0011	0.9528	TRUE
		rs7647305	T	C	-0.0157347	0.00255272	37.99	3.9e-10	-0.0008	0.0014	0.5667	TRUE
		rs769449	G	A	-0.0202374	0.00315476	41.15	1e-10	-0.0026	0.0017	0.1292	TRUE
		rs7818437	T	C	0.017988	0.00248437	52.42	2.8e-13	-0.0008	0.0013	0.5335	TRUE
		rs7849142	G	T	-0.0146676	0.00221736	43.76	4.9e-11	-0.0021	0.0012	0.07501	TRUE
		rs7869969	A	G	-0.0141271	0.00222104	40.46	2e-10	-0.0029	0.0012	0.01123	TRUE
		rs7898861	T	C	0.0133985	0.00209308	40.98	9.8e-11	0.0001	0.0011	0.9083	TRUE
		rs7969091	A	G	-0.0119566	0.00211189	32.05	1.8e-08	-0.0008	0.0011	0.4637	TRUE
		rs7982441	T	C	0.013647	0.00235511	33.58	6.3e-09	-0.0001	0.0012	0.9382	TRUE
		rs8045829	T	G	0.0131216	0.00214736	37.34	1e-09	0.0027	0.0012	0.02105	TRUE
		rs8095324	A	G	0.0125095	0.00213686	34.27	2.5e-09	0.0009	0.0011	0.4345	TRUE
		rs817223	T	C	0.0132308	0.00209068	40.05	1.9e-10	0.0005	0.0011	0.6188	TRUE
		rs826596	G	A	-0.0124791	0.00221455	31.75	2.6e-08	-0.0012	0.0012	0.321	TRUE
		rs862227	A	G	0.0177785	0.00209504	72.01	1.4e-17	-0.0001	0.0012	0.9513	TRUE
		rs9517948	C	T	-0.0131224	0.00210918	38.71	3.1e-10	-0.0007	0.0011	0.5251	TRUE
		rs9635715	T	C	-0.0119094	0.00210988	31.86	1.6e-08	-0.0001	0.0012	0.9626	TRUE
freshfruit_piecesperday	THICK_lateralorbitofrontal	rs10013628	G	T	-0.0119748	0.00211959	31.92	2.2e-08	0.0013	0.0012	0.2517	TRUE
		rs10064431	T	C	0.0121739	0.00209611	33.73	9e-09	0.0004	0.0012	0.7239	TRUE
		rs10128597	G	A	-0.0151747	0.00235557	41.5	2e-10	-0.0007	0.0012	0.5268	TRUE
		rs10163879	G	A	-0.0179807	0.00213579	70.88	4.1e-17	-0.0002	0.0011	0.8405	TRUE
		rs10192394	C	T	0.0134182	0.00210142	40.77	1.9e-10	-0.001	0.0011	0.374	TRUE
		rs10249294	G	A	-0.0367825	0.00215984	290.03	5.7e-65	-0.0007	0.0011	0.5263	TRUE
		rs10407367	A	C	0.0117779	0.00217373	29.36	4.6e-08	-0.0027	0.0012	0.02346	TRUE
		rs10490869	A	T	0.014723	0.00257685	32.64	1.1e-08	0.0004	0.0013	0.7821	TRUE
		rs10504754	G	A	-0.0121935	0.00219771	30.78	2.3e-08	-0.0002	0.0011	0.874	TRUE
		rs10828266	A	G	-0.0258864	0.00232405	124.07	1.3e-28	-0.0003	0.0012	0.8174	TRUE
		rs11032362	G	A	-0.0237924	0.00363423	42.86	3.2e-11	0.0016	0.002	0.4188	TRUE
		rs11039265	C	A	-0.016661	0.00219129	57.81	2.7e-14	0.0003	0.0012	0.8187	TRUE
		rs111526888	A	G	-0.0189483	0.00232811	66.24	4.5e-16	-0.0019	0.0012	0.1166	TRUE
		rs111915841	G	C	-0.0139639	0.00224416	38.72	5.6e-10	0	0.0012	0.9728	TRUE
		rs1148672	G	A	0.0131084	0.00217512	36.32	1.3e-09	0.0019	0.0011	0.09253	TRUE
		rs115067791	G	A	-0.0273261	0.00452142	36.53	1.5e-09	-0.0009	0.0026	0.7433	TRUE
		rs115540638	A	T	0.0181221	0.00253205	51.22	1.5e-12	-0.0013	0.0015	0.3629	TRUE
		rs11581076	C	T	-0.0116981	0.00212363	30.34	3.5e-08	-0.002	0.0012	0.07992	TRUE
		rs12196849	C	A	-0.0130063	0.00217291	35.83	1.9e-09	0.0001	0.0011	0.9366	TRUE
		rs12536253	G	C	0.0151918	0.00242356	39.29	3.2e-10	-0.0002	0.0013	0.8588	TRUE
		rs12784301	A	G	-0.0141457	0.00230953	37.51	8.7e-10	0.0002	0.0013	0.8678	TRUE
		rs12885598	G	A	-0.0131298	0.00213442	37.84	1.5e-09	0.0012	0.0011	0.2723	TRUE
		rs12933575	A	G	-0.013245	0.00209552	39.95	2.5e-10	0.0009	0.0011	0.4363	TRUE
		rs12986222	T	C	0.0130176	0.00214948	36.68	1.4e-09	-0.0019	0.0017	0.2623	TRUE
		rs13064579	C	T	-0.0122003	0.0021631	31.81	1.3e-08	-0.0014	0.0011	0.2018	TRUE
		rs1328600	C	A	-0.0123173	0.00214166	33.08	8.3e-09	0.0007	0.0011	0.5217	TRUE
		rs140865897	C	T	0.0123569	0.00222856	30.74	1.8e-08	0.0003	0.0012	0.8087	TRUE
		rs1460255	T	C	0.0129153	0.00219401	34.65	2.8e-09	-0.001	0.0011	0.3687	TRUE
		rs1556623	G	A	0.0116887	0.00210762	30.76	3.1e-08	-0.0004	0.0011	0.689	TRUE
		rs1620977	A	G	0.0246378	0.00235785	109.19	3e-25	0.0012	0.0013	0.3292	TRUE
		rs17359991	G	C	-0.0250248	0.00413919	36.55	2.9e-09	-0.0027	0.0022	0.2248	TRUE
		rs1827913	G	A	-0.0124577	0.00223403	31.1	3.1e-08	-0.002	0.0011	0.06671	TRUE
		rs1964272	G	A	-0.0164098	0.00209275	61.49	8.4e-15	-0.0016	0.0011	0.1639	TRUE
		rs2326319	G	A	0.0149317	0.00218474	46.71	1.1e-11	0.0005	0.0011	0.6451	TRUE
		rs2370982	C	T	-0.0216357	0.00256334	71.24	2.7e-17	0.0002	0.0013	0.907	TRUE
		rs2425836	A	G	-0.0119616	0.00212513	31.68	1.6e-08	0.0003	0.0011	0.8101	TRUE
		rs2432801	G	A	0.0130398	0.00233795	31.11	1.6e-08	0.0012	0.0012	0.3159	TRUE
		rs2472297	C	T	0.0158941	0.00237284	44.87	1.6e-11	-0.0012	0.0013	0.3404	TRUE
		rs2504671	C	A	-0.0255358	0.00247341	106.59	5.4e-25	-0.0019	0.0012	0.1234	TRUE
		rs2578697	T	C	-0.0134675	0.00208636	41.67	1e-10	0.0004	0.0011	0.6834	TRUE
		rs2790688	C	T	-0.0209061	0.00289759	52.06	2.3e-13	-0.003	0.0016	0.05949	TRUE
		rs2915859	C	T	-0.0121425	0.00219487	30.61	3.6e-08	0	0.0011	0.9663	TRUE
		rs2922629	T	G	-0.011658	0.00214399	29.57	4.9e-08	0.0004	0.0011	0.7493	TRUE
		rs329274	A	G	-0.0148839	0.00209969	50.25	1.3e-12	-0.0002	0.0011	0.8301	TRUE
		rs34162196	C	T	0.0348287	0.00346835	100.84	5.1e-24	0.0013	0.0019	0.4778	TRUE
		rs4141843	A	T	0.0155953	0.00221025	49.79	1.9e-12	-0.0004	0.0012	0.7564	TRUE
		rs4343305	A	G	0.0127093	0.00213384	35.47	2.2e-09	0.001	0.0011	0.3709	TRUE
		rs4655962	C	T	0.0127195	0.0021697	34.37	3.7e-09	0.0017	0.0011	0.1414	TRUE
		rs4953150	C	T	0.0184727	0.00221042	69.84	7.6e-17	0.0015	0.0011	0.1734	TRUE
		rs559734	G	C	-0.0132855	0.00232478	32.66	7.8e-09	-0.0011	0.0012	0.3898	TRUE
		rs60452247	G	A	-0.0140144	0.00217018	41.7	8.2e-11	0.0008	0.0011	0.4499	TRUE
		rs6475725	T	G	-0.0141887	0.00239913	34.98	2.6e-09	0.0011	0.0012	0.3873	TRUE
		rs6548237	A	C	-0.0197009	0.00275974	50.96	6.9e-13	-0.0015	0.0014	0.3047	TRUE
		rs664544	C	T	0.0122883	0.00222574	30.48	2e-08	-0.0016	0.0011	0.1527	TRUE
		rs6868457	T	C	-0.0138515	0.00210148	43.45	3e-11	-0.0009	0.0011	0.3965	TRUE
		rs6961517	G	T	0.0141868	0.00227982	38.72	6.7e-10	0.0027	0.0012	0.02075	TRUE
		rs7093561	G	A	-0.0178909	0.00325371	30.23	3.2e-08	-0.0002	0.0018	0.9169	TRUE
		rs721575	C	T	0.0117891	0.00210358	31.41	2.5e-08	0.003	0.0011	0.009374	TRUE
		rs739320	T	C	0.017667	0.0021895	65.11	6.2e-16	-0.0002	0.0017	0.9179	TRUE
		rs7554485	T	C	0.0140767	0.00214451	43.09	5.7e-11	-0.0001	0.0011	0.9517	TRUE
		rs7647305	T	C	-0.0157347	0.00255272	37.99	3.9e-10	0.0011	0.0013	0.4134	TRUE
		rs769449	G	A	-0.0202374	0.00315476	41.15	1e-10	-0.0021	0.0017	0.2056	TRUE
		rs7818437	T	C	0.017988	0.00248437	52.42	2.8e-13	-0.0004	0.0013	0.7771	TRUE
		rs7849142	G	T	-0.0146676	0.00221736	43.76	4.9e-11	0.0004	0.0011	0.7324	TRUE
		rs7869969	A	G	-0.0141271	0.00222104	40.46	2e-10	0.0013	0.0011	0.256	TRUE
		rs7898861	T	C	0.0133985	0.00209308	40.98	9.8e-11	0.0007	0.0011	0.5188	TRUE
		rs7969091	A	G	-0.0119566	0.00211189	32.05	1.8e-08	-0.0006	0.0011	0.5759	TRUE
		rs7982441	T	C	0.013647	0.00235511	33.58	6.3e-09	-0.0019	0.0012	0.115	TRUE
		rs8045829	T	G	0.0131216	0.00214736	37.34	1e-09	0.0011	0.0011	0.3407	TRUE
		rs8095324	A	G	0.0125095	0.00213686	34.27	2.5e-09	0.002	0.0011	0.06862	TRUE
		rs817223	T	C	0.0132308	0.00209068	40.05	1.9e-10	0.0001	0.0011	0.915	TRUE
		rs826596	G	A	-0.0124791	0.00221455	31.75	2.6e-08	-0.0012	0.0011	0.2926	TRUE
		rs862227	A	G	0.0177785	0.00209504	72.01	1.4e-17	0.0003	0.0011	0.8192	TRUE
		rs9517948	C	T	-0.0131224	0.00210918	38.71	3.1e-10	0.0001	0.0011	0.9421	TRUE
		rs9635715	T	C	-0.0119094	0.00210988	31.86	1.6e-08	-0.0006	0.0012	0.5821	TRUE
freshfruit_piecesperday	THICK_parstriangularis	rs10013628	G	T	-0.0119748	0.00211959	31.92	2.2e-08	0.0016	0.001	0.1151	TRUE
		rs10064431	T	C	0.0121739	0.00209611	33.73	9e-09	0.0016	0.001	0.1197	TRUE
		rs10128597	G	A	-0.0151747	0.00235557	41.5	2e-10	-0.0002	0.001	0.8247	TRUE
		rs10163879	G	A	-0.0179807	0.00213579	70.88	4.1e-17	-0.0003	0.0009	0.7422	TRUE
		rs10192394	C	T	0.0134182	0.00210142	40.77	1.9e-10	0.0006	0.001	0.5546	TRUE
		rs10249294	G	A	-0.0367825	0.00215984	290.03	5.7e-65	-0.0008	0.001	0.4114	TRUE
		rs10407367	A	C	0.0117779	0.00217373	29.36	4.6e-08	0.0003	0.001	0.7992	TRUE
		rs10490869	A	T	0.014723	0.00257685	32.64	1.1e-08	0.0016	0.0011	0.1611	TRUE
		rs10504754	G	A	-0.0121935	0.00219771	30.78	2.3e-08	-0.0014	0.001	0.1402	TRUE
		rs10828266	A	G	-0.0258864	0.00232405	124.07	1.3e-28	0.0002	0.001	0.8708	TRUE
		rs11032362	G	A	-0.0237924	0.00363423	42.86	3.2e-11	0.0023	0.0017	0.1805	TRUE
		rs11039265	C	A	-0.016661	0.00219129	57.81	2.7e-14	0.0008	0.001	0.4216	TRUE
		rs111526888	A	G	-0.0189483	0.00232811	66.24	4.5e-16	-0.0003	0.001	0.798	TRUE
		rs111915841	G	C	-0.0139639	0.00224416	38.72	5.6e-10	0.0002	0.001	0.8083	TRUE
		rs1148672	G	A	0.0131084	0.00217512	36.32	1.3e-09	0	0.001	0.9846	TRUE
		rs115067791	G	A	-0.0273261	0.00452142	36.53	1.5e-09	-0.0043	0.0023	0.0549	TRUE
		rs115540638	A	T	0.0181221	0.00253205	51.22	1.5e-12	0.0007	0.0013	0.5833	TRUE
		rs11581076	C	T	-0.0116981	0.00212363	30.34	3.5e-08	-0.0012	0.001	0.2292	TRUE
		rs12196849	C	A	-0.0130063	0.00217291	35.83	1.9e-09	0	0.001	0.9874	TRUE
		rs12536253	G	C	0.0151918	0.00242356	39.29	3.2e-10	0.0006	0.0011	0.5838	TRUE
		rs12784301	A	G	-0.0141457	0.00230953	37.51	8.7e-10	0.0004	0.0011	0.6839	TRUE
		rs12885598	G	A	-0.0131298	0.00213442	37.84	1.5e-09	0.0012	0.001	0.2111	TRUE
		rs12933575	A	G	-0.013245	0.00209552	39.95	2.5e-10	0	0.001	0.9816	TRUE
		rs12986222	T	C	0.0130176	0.00214948	36.68	1.4e-09	0.0011	0.0015	0.4688	TRUE
		rs13064579	C	T	-0.0122003	0.0021631	31.81	1.3e-08	0.0002	0.001	0.8289	TRUE
		rs1328600	C	A	-0.0123173	0.00214166	33.08	8.3e-09	0.0008	0.001	0.4028	TRUE
		rs140865897	C	T	0.0123569	0.00222856	30.74	1.8e-08	0.0023	0.001	0.02026	TRUE
		rs1460255	T	C	0.0129153	0.00219401	34.65	2.8e-09	0.0016	0.001	0.09545	TRUE
		rs1556623	G	A	0.0116887	0.00210762	30.76	3.1e-08	0.0024	0.001	0.01272	TRUE
		rs1620977	A	G	0.0246378	0.00235785	109.19	3e-25	0.0013	0.0011	0.2396	TRUE
		rs17359991	G	C	-0.0250248	0.00413919	36.55	2.9e-09	0.0009	0.0019	0.6339	TRUE
		rs1827913	G	A	-0.0124577	0.00223403	31.1	3.1e-08	0.0007	0.001	0.4677	TRUE
		rs1964272	G	A	-0.0164098	0.00209275	61.49	8.4e-15	0.0003	0.001	0.7581	TRUE
		rs2326319	G	A	0.0149317	0.00218474	46.71	1.1e-11	0.0001	0.001	0.9	TRUE
		rs2370982	C	T	-0.0216357	0.00256334	71.24	2.7e-17	-0.0007	0.0011	0.5133	TRUE
		rs2425836	A	G	-0.0119616	0.00212513	31.68	1.6e-08	0	0.0009	0.9765	TRUE
		rs2432801	G	A	0.0130398	0.00233795	31.11	1.6e-08	0.0009	0.0011	0.3783	TRUE
		rs2472297	C	T	0.0158941	0.00237284	44.87	1.6e-11	0.0004	0.0011	0.7331	TRUE
		rs2504671	C	A	-0.0255358	0.00247341	106.59	5.4e-25	-0.0012	0.0011	0.2509	TRUE
		rs2578697	T	C	-0.0134675	0.00208636	41.67	1e-10	0.0006	0.0009	0.5335	TRUE
		rs2790688	C	T	-0.0209061	0.00289759	52.06	2.3e-13	-0.0001	0.0014	0.945	TRUE
		rs2915859	C	T	-0.0121425	0.00219487	30.61	3.6e-08	0.0002	0.001	0.8774	TRUE
		rs2922629	T	G	-0.011658	0.00214399	29.57	4.9e-08	0.0009	0.001	0.3654	TRUE
		rs329274	A	G	-0.0148839	0.00209969	50.25	1.3e-12	-0.0012	0.001	0.1947	TRUE
		rs34162196	C	T	0.0348287	0.00346835	100.84	5.1e-24	0.0008	0.0016	0.606	TRUE
		rs4141843	A	T	0.0155953	0.00221025	49.79	1.9e-12	0.0019	0.001	0.06293	TRUE
		rs4343305	A	G	0.0127093	0.00213384	35.47	2.2e-09	-0.0003	0.0009	0.7529	TRUE
		rs4655962	C	T	0.0127195	0.0021697	34.37	3.7e-09	0.001	0.001	0.3265	TRUE
		rs4953150	C	T	0.0184727	0.00221042	69.84	7.6e-17	0.0004	0.001	0.6602	TRUE
		rs559734	G	C	-0.0132855	0.00232478	32.66	7.8e-09	0.0018	0.0011	0.08964	TRUE
		rs60452247	G	A	-0.0140144	0.00217018	41.7	8.2e-11	-0.0002	0.001	0.852	TRUE
		rs6475725	T	G	-0.0141887	0.00239913	34.98	2.6e-09	0.0008	0.0011	0.469	TRUE
		rs6548237	A	C	-0.0197009	0.00275974	50.96	6.9e-13	0.0004	0.0012	0.7241	TRUE
		rs664544	C	T	0.0122883	0.00222574	30.48	2e-08	-0.0004	0.001	0.6621	TRUE
		rs6868457	T	C	-0.0138515	0.00210148	43.45	3e-11	-0.0014	0.0009	0.142	TRUE
		rs6961517	G	T	0.0141868	0.00227982	38.72	6.7e-10	0.0009	0.001	0.3617	TRUE
		rs7093561	G	A	-0.0178909	0.00325371	30.23	3.2e-08	0.0004	0.0016	0.7957	TRUE
		rs721575	C	T	0.0117891	0.00210358	31.41	2.5e-08	-0.0004	0.001	0.6546	TRUE
		rs739320	T	C	0.017667	0.0021895	65.11	6.2e-16	0.0002	0.0015	0.8881	TRUE
		rs7554485	T	C	0.0140767	0.00214451	43.09	5.7e-11	0.0008	0.0009	0.3941	TRUE
		rs7647305	T	C	-0.0157347	0.00255272	37.99	3.9e-10	-0.0006	0.0012	0.6222	TRUE
		rs769449	G	A	-0.0202374	0.00315476	41.15	1e-10	0.0003	0.0014	0.8398	TRUE
		rs7818437	T	C	0.017988	0.00248437	52.42	2.8e-13	-0.0014	0.0011	0.2178	TRUE
		rs7849142	G	T	-0.0146676	0.00221736	43.76	4.9e-11	0.0007	0.001	0.4965	TRUE
		rs7869969	A	G	-0.0141271	0.00222104	40.46	2e-10	-0.0002	0.001	0.8458	TRUE
		rs7898861	T	C	0.0133985	0.00209308	40.98	9.8e-11	0	0.0009	0.9859	TRUE
		rs7969091	A	G	-0.0119566	0.00211189	32.05	1.8e-08	-0.0005	0.0009	0.5681	TRUE
		rs7982441	T	C	0.013647	0.00235511	33.58	6.3e-09	0.0006	0.001	0.5749	TRUE
		rs8045829	T	G	0.0131216	0.00214736	37.34	1e-09	-0.0001	0.001	0.9307	TRUE
		rs8095324	A	G	0.0125095	0.00213686	34.27	2.5e-09	-0.0001	0.001	0.9177	TRUE
		rs817223	T	C	0.0132308	0.00209068	40.05	1.9e-10	0.001	0.0009	0.2734	TRUE
		rs826596	G	A	-0.0124791	0.00221455	31.75	2.6e-08	-0.0003	0.001	0.7959	TRUE
		rs862227	A	G	0.0177785	0.00209504	72.01	1.4e-17	-0.0011	0.001	0.2549	TRUE
		rs9517948	C	T	-0.0131224	0.00210918	38.71	3.1e-10	-0.0009	0.0009	0.3336	TRUE
		rs9635715	T	C	-0.0119094	0.00210988	31.86	1.6e-08	-0.0013	0.001	0.1989	TRUE
hotdrinktemp	SA_lateraloccipital	rs10764990	G	A	0.0160406	0.00214701	55.82	5.7e-14	2.689	3.6109	0.4565	TRUE
		rs10829603	T	G	0.0144656	0.00211301	46.87	3.4e-12	2.7383	3.4123	0.4223	TRUE
		rs10918383	T	C	0.0134206	0.00246929	29.54	4.9e-08	-4.273	3.9944	0.2847	TRUE
		rs10949576	A	G	0.0119987	0.00210504	32.49	1.5e-08	4.9948	3.3883	0.1405	TRUE
		rs11138794	G	A	-0.0122498	0.00224355	29.81	4.6e-08	0.6292	3.661	0.8635	TRUE
		rs112203261	C	A	-0.0151421	0.00219519	47.58	5.2e-12	-9.6918	5.2729	0.06606	TRUE
		rs112706793	A	G	0.0253007	0.00430775	34.5	3.3e-09	19.0851	6.9204	0.005819	TRUE
		rs1144428	G	A	0.0181658	0.00257892	49.62	2.3e-12	3.2943	4.3453	0.4484	TRUE
		rs11710570	T	C	-0.0124685	0.00210589	35.06	2.5e-09	3.4339	3.3927	0.3115	TRUE
		rs12197552	C	G	0.0220922	0.0040073	30.39	4e-08	-11.3293	7.8889	0.151	TRUE
		rs12418887	A	G	0.0201663	0.00282336	51.02	8.2e-13	-3.3804	4.5376	0.4563	TRUE
		rs1260326	T	C	-0.0130294	0.00214173	37.01	1.4e-09	0.8385	3.4755	0.8094	TRUE
		rs12607072	G	A	-0.0159479	0.00216414	54.3	2.5e-13	4.5344	3.4647	0.1906	TRUE
		rs1326609	G	A	-0.0121333	0.0021717	31.21	2.1e-08	3.1586	3.4997	0.3668	TRUE
		rs133069	A	C	-0.0144745	0.00215853	44.97	1.3e-11	3.8366	3.7757	0.3096	TRUE
		rs1430204	T	C	-0.018708	0.00259834	51.84	5.7e-13	10.4955	4.1135	0.01073	TRUE
		rs1447182	T	C	0.0164134	0.00256109	41.07	1.7e-10	-3.1254	4.2147	0.4584	TRUE
		rs1462855	C	T	0.0140939	0.00212433	44.02	2.4e-11	-9.902	3.4561	0.004169	TRUE
		rs1513475	T	C	-0.0145065	0.0022002	43.47	3.8e-11	-5.7114	3.5727	0.1099	TRUE
		rs1519659	G	A	-0.0145943	0.00244595	35.6	3.2e-09	-1.1138	3.933	0.777	TRUE
		rs17409597	T	C	-0.012241	0.00210966	33.67	7.7e-09	3.0579	3.4409	0.3742	TRUE
		rs17513240	A	T	-0.0163279	0.00277067	34.73	3.2e-09	-6.0569	4.39	0.1677	TRUE
		rs2472297	C	T	-0.0267528	0.00237863	126.5	3.7e-29	16.212	4.0335	5.835e-05	TRUE
		rs2551023	A	C	-0.0148365	0.00210657	49.6	2.7e-12	-2.3275	3.4008	0.4937	TRUE
		rs2702576	A	G	0.0120864	0.00216415	31.19	2e-08	-7.0969	3.4689	0.04077	TRUE
		rs2717046	C	T	-0.0163717	0.00216555	57.15	3.9e-14	1.2927	3.4968	0.7116	TRUE
		rs34292254	G	T	0.0115332	0.00211278	29.8	4.3e-08	0.0788	3.3975	0.9815	TRUE
		rs34521235	T	C	-0.0146508	0.00263171	30.99	2.6e-08	6.659	4.3508	0.1259	TRUE
		rs4271161	T	C	0.01233	0.00225085	30.01	3.8e-08	2.2261	3.5252	0.5277	TRUE
		rs4410790	T	C	-0.0171468	0.00217606	62.09	2.4e-15	1.4307	3.5178	0.6842	TRUE
		rs4451990	A	G	0.0131068	0.00234896	31.13	2.3e-08	-3.3862	3.7415	0.3654	TRUE
		rs4529888	G	A	-0.012154	0.00213232	32.49	1e-08	-6.8005	3.4178	0.04662	TRUE
		rs4537651	G	A	0.0115452	0.0021012	30.19	3.2e-08	1.8117	3.4493	0.5994	TRUE
		rs55880962	G	A	0.0174459	0.00265919	43.04	6e-11	-6.28	4.2638	0.1408	TRUE
		rs56143595	G	T	-0.015923	0.00230643	47.66	3.6e-12	6.7712	3.7521	0.07113	TRUE
		rs6581514	G	A	0.012063	0.00209726	33.08	4.9e-09	-2.6478	3.3993	0.436	TRUE
		rs6695785	T	C	0.0160463	0.00211881	57.35	3.7e-14	1.4512	3.4362	0.6728	TRUE
		rs6871231	C	T	-0.0127891	0.00216663	34.84	4e-09	-0.4872	3.4644	0.8882	TRUE
		rs72636697	C	T	-0.0175683	0.00310227	32.07	1.3e-08	4.0674	4.437	0.3593	TRUE
		rs7283775	G	T	0.0136384	0.00232857	34.3	6.4e-09	-1.723	3.9939	0.6662	TRUE
		rs7618494	A	G	0.0206368	0.00219107	88.71	5.7e-21	0.2502	3.5626	0.944	TRUE
		rs9267445	G	C	-0.0251045	0.00302627	68.82	1.2e-16	9.0562	5.3357	0.08964	TRUE
		rs9453572	T	C	-0.0134726	0.00222405	36.7	9.6e-10	-0.8721	3.6459	0.811	TRUE
		rs9568867	G	A	-0.0181193	0.00315292	33.03	7.9e-09	-5.8422	5.0343	0.2459	TRUE
		rs968050	C	T	-0.0114273	0.00210113	29.58	4.7e-08	1.677	3.3986	0.6217	TRUE
		rs992313	A	G	0.0148038	0.00211712	48.89	1.7e-12	-3.4566	3.4314	0.3138	TRUE
hotdrinktemp	SA_parahippocampal	rs10764990	G	A	0.0160406	0.00214701	55.82	5.7e-14	-0.8427	0.7471	0.2593	TRUE
		rs10829603	T	G	0.0144656	0.00211301	46.87	3.4e-12	-0.1264	0.7064	0.858	TRUE
		rs10918383	T	C	0.0134206	0.00246929	29.54	4.9e-08	-0.0967	0.8281	0.907	TRUE
		rs10949576	A	G	0.0119987	0.00210504	32.49	1.5e-08	0.3095	0.7025	0.6595	TRUE
		rs11138794	G	A	-0.0122498	0.00224355	29.81	4.6e-08	0.1378	0.7611	0.8563	TRUE
		rs112203261	C	A	-0.0151421	0.00219519	47.58	5.2e-12	-1.1115	1.1129	0.3179	TRUE
		rs112706793	A	G	0.0253007	0.00430775	34.5	3.3e-09	2.3545	1.4361	0.1011	TRUE
		rs1144428	G	A	0.0181658	0.00257892	49.62	2.3e-12	0.3523	0.9019	0.696	TRUE
		rs11710570	T	C	-0.0124685	0.00210589	35.06	2.5e-09	-0.2941	0.7033	0.6759	TRUE
		rs12197552	C	G	0.0220922	0.0040073	30.39	4e-08	0.9321	1.6686	0.5764	TRUE
		rs12418887	A	G	0.0201663	0.00282336	51.02	8.2e-13	0.2963	0.9389	0.7523	TRUE
		rs1260326	T	C	-0.0130294	0.00214173	37.01	1.4e-09	-0.677	0.7215	0.3481	TRUE
		rs12607072	G	A	-0.0159479	0.00216414	54.3	2.5e-13	-1.0913	0.7203	0.1298	TRUE
		rs1326609	G	A	-0.0121333	0.0021717	31.21	2.1e-08	0.3543	0.7273	0.6262	TRUE
		rs133069	A	C	-0.0144745	0.00215853	44.97	1.3e-11	0.1564	0.7823	0.8416	TRUE
		rs1430204	T	C	-0.018708	0.00259834	51.84	5.7e-13	0.2787	0.8513	0.7434	TRUE
		rs1447182	T	C	0.0164134	0.00256109	41.07	1.7e-10	0.4266	0.8745	0.6257	TRUE
		rs1462855	C	T	0.0140939	0.00212433	44.02	2.4e-11	0.2957	0.7164	0.6798	TRUE
		rs1513475	T	C	-0.0145065	0.0022002	43.47	3.8e-11	-0.8138	0.7431	0.2735	TRUE
		rs1519659	G	A	-0.0145943	0.00244595	35.6	3.2e-09	-0.9091	0.8166	0.2656	TRUE
		rs17409597	T	C	-0.012241	0.00210966	33.67	7.7e-09	-1.3059	0.7133	0.06712	TRUE
		rs17513240	A	T	-0.0163279	0.00277067	34.73	3.2e-09	-1.6348	0.9146	0.07389	TRUE
		rs2472297	C	T	-0.0267528	0.00237863	126.5	3.7e-29	-0.8994	0.8506	0.2903	TRUE
		rs2551023	A	C	-0.0148365	0.00210657	49.6	2.7e-12	0.464	0.7042	0.51	TRUE
		rs2702576	A	G	0.0120864	0.00216415	31.19	2e-08	0.6635	0.7201	0.3569	TRUE
		rs2717046	C	T	-0.0163717	0.00216555	57.15	3.9e-14	1.0371	0.7249	0.1525	TRUE
		rs34292254	G	T	0.0115332	0.00211278	29.8	4.3e-08	-0.7375	0.7045	0.2952	TRUE
		rs34521235	T	C	-0.0146508	0.00263171	30.99	2.6e-08	0.079	0.9021	0.9303	TRUE
		rs4271161	T	C	0.01233	0.00225085	30.01	3.8e-08	-0.6292	0.7318	0.3899	TRUE
		rs4410790	T	C	-0.0171468	0.00217606	62.09	2.4e-15	-0.9914	0.7299	0.1743	TRUE
		rs4451990	A	G	0.0131068	0.00234896	31.13	2.3e-08	-0.5279	0.7782	0.4975	TRUE
		rs4529888	G	A	-0.012154	0.00213232	32.49	1e-08	0.1689	0.7089	0.8117	TRUE
		rs4537651	G	A	0.0115452	0.0021012	30.19	3.2e-08	0.7574	0.7158	0.29	TRUE
		rs55880962	G	A	0.0174459	0.00265919	43.04	6e-11	-0.4769	0.8923	0.593	TRUE
		rs56143595	G	T	-0.015923	0.00230643	47.66	3.6e-12	0.4801	0.7759	0.5361	TRUE
		rs6581514	G	A	0.012063	0.00209726	33.08	4.9e-09	0.3661	0.7059	0.604	TRUE
		rs6695785	T	C	0.0160463	0.00211881	57.35	3.7e-14	-0.8606	0.7107	0.226	TRUE
		rs6871231	C	T	-0.0127891	0.00216663	34.84	4e-09	-0.6219	0.7209	0.3883	TRUE
		rs72636697	C	T	-0.0175683	0.00310227	32.07	1.3e-08	-1.3034	0.9138	0.1538	TRUE
		rs7283775	G	T	0.0136384	0.00232857	34.3	6.4e-09	1.2385	0.8359	0.1384	TRUE
		rs7618494	A	G	0.0206368	0.00219107	88.71	5.7e-21	0.4092	0.7392	0.5798	TRUE
		rs9267445	G	C	-0.0251045	0.00302627	68.82	1.2e-16	-1.4872	1.1168	0.183	TRUE
		rs9453572	T	C	-0.0134726	0.00222405	36.7	9.6e-10	-0.3647	0.7567	0.6299	TRUE
		rs9568867	G	A	-0.0181193	0.00315292	33.03	7.9e-09	-0.3711	1.0566	0.7254	TRUE
		rs968050	C	T	-0.0114273	0.00210113	29.58	4.7e-08	-0.257	0.703	0.7147	TRUE
		rs992313	A	G	0.0148038	0.00211712	48.89	1.7e-12	-0.8715	0.7113	0.2205	TRUE
hotdrinktemp	SA_parsopercularis	rs10764990	G	A	0.0160406	0.00214701	55.82	5.7e-14	0.09	1.7225	0.9583	TRUE
		rs10829603	T	G	0.0144656	0.00211301	46.87	3.4e-12	2.8524	1.6268	0.07955	TRUE
		rs10918383	T	C	0.0134206	0.00246929	29.54	4.9e-08	2.7298	1.9047	0.1518	TRUE
		rs10949576	A	G	0.0119987	0.00210504	32.49	1.5e-08	2.4098	1.6154	0.1358	TRUE
		rs11138794	G	A	-0.0122498	0.00224355	29.81	4.6e-08	-0.2184	1.7511	0.9007	TRUE
		rs112203261	C	A	-0.0151421	0.00219519	47.58	5.2e-12	0.6865	2.503	0.7839	TRUE
		rs112706793	A	G	0.0253007	0.00430775	34.5	3.3e-09	-1.4488	3.2905	0.6597	TRUE
		rs1144428	G	A	0.0181658	0.00257892	49.62	2.3e-12	0.2103	2.0578	0.9186	TRUE
		rs11710570	T	C	-0.0124685	0.00210589	35.06	2.5e-09	0.5149	1.6174	0.7502	TRUE
		rs12197552	C	G	0.0220922	0.0040073	30.39	4e-08	2.7398	3.7667	0.467	TRUE
		rs12418887	A	G	0.0201663	0.00282336	51.02	8.2e-13	3.1231	2.1592	0.1481	TRUE
		rs1260326	T	C	-0.0130294	0.00214173	37.01	1.4e-09	0.2371	1.6571	0.8862	TRUE
		rs12607072	G	A	-0.0159479	0.00216414	54.3	2.5e-13	-0.4366	1.6517	0.7915	TRUE
		rs1326609	G	A	-0.0121333	0.0021717	31.21	2.1e-08	-4.9499	1.6661	0.002969	TRUE
		rs133069	A	C	-0.0144745	0.00215853	44.97	1.3e-11	-1.0679	1.8049	0.5541	TRUE
		rs1430204	T	C	-0.018708	0.00259834	51.84	5.7e-13	1.9071	1.9573	0.3299	TRUE
		rs1447182	T	C	0.0164134	0.00256109	41.07	1.7e-10	3.7786	2.0041	0.05937	TRUE
		rs1462855	C	T	0.0140939	0.00212433	44.02	2.4e-11	-0.9916	1.6473	0.5472	TRUE
		rs1513475	T	C	-0.0145065	0.0022002	43.47	3.8e-11	-2.5768	1.7014	0.1299	TRUE
		rs1519659	G	A	-0.0145943	0.00244595	35.6	3.2e-09	-0.9137	1.8703	0.6252	TRUE
		rs17409597	T	C	-0.012241	0.00210966	33.67	7.7e-09	-1.9954	1.6367	0.2228	TRUE
		rs17513240	A	T	-0.0163279	0.00277067	34.73	3.2e-09	0.1651	2.0949	0.9372	TRUE
		rs2472297	C	T	-0.0267528	0.00237863	126.5	3.7e-29	-3.2832	1.9311	0.08911	TRUE
		rs2551023	A	C	-0.0148365	0.00210657	49.6	2.7e-12	-4.2465	1.6195	0.008737	TRUE
		rs2702576	A	G	0.0120864	0.00216415	31.19	2e-08	-2.104	1.6524	0.2029	TRUE
		rs2717046	C	T	-0.0163717	0.00216555	57.15	3.9e-14	1.775	1.6635	0.286	TRUE
		rs34292254	G	T	0.0115332	0.00211278	29.8	4.3e-08	-0.1435	1.6164	0.9293	TRUE
		rs34521235	T	C	-0.0146508	0.00263171	30.99	2.6e-08	-0.3715	2.0738	0.8578	TRUE
		rs4271161	T	C	0.01233	0.00225085	30.01	3.8e-08	1.4319	1.687	0.396	TRUE
		rs4410790	T	C	-0.0171468	0.00217606	62.09	2.4e-15	-1.4537	1.676	0.3857	TRUE
		rs4451990	A	G	0.0131068	0.00234896	31.13	2.3e-08	3.1627	1.7837	0.07621	TRUE
		rs4529888	G	A	-0.012154	0.00213232	32.49	1e-08	-0.8199	1.6311	0.6152	TRUE
		rs4537651	G	A	0.0115452	0.0021012	30.19	3.2e-08	-2.4904	1.6416	0.1293	TRUE
		rs55880962	G	A	0.0174459	0.00265919	43.04	6e-11	0.4634	2.0246	0.819	TRUE
		rs56143595	G	T	-0.015923	0.00230643	47.66	3.6e-12	2.6626	1.7854	0.1359	TRUE
		rs6581514	G	A	0.012063	0.00209726	33.08	4.9e-09	-0.2519	1.621	0.8765	TRUE
		rs6695785	T	C	0.0160463	0.00211881	57.35	3.7e-14	-0.4828	1.6393	0.7683	TRUE
		rs6871231	C	T	-0.0127891	0.00216663	34.84	4e-09	1.0063	1.6613	0.5447	TRUE
		rs72636697	C	T	-0.0175683	0.00310227	32.07	1.3e-08	1.3808	2.1182	0.5145	TRUE
		rs7283775	G	T	0.0136384	0.00232857	34.3	6.4e-09	0.2254	1.9109	0.9061	TRUE
		rs7618494	A	G	0.0206368	0.00219107	88.71	5.7e-21	1.6927	1.696	0.3182	TRUE
		rs9267445	G	C	-0.0251045	0.00302627	68.82	1.2e-16	-3.3327	2.5424	0.1899	TRUE
		rs9453572	T	C	-0.0134726	0.00222405	36.7	9.6e-10	-1.3474	1.7383	0.4383	TRUE
		rs9568867	G	A	-0.0181193	0.00315292	33.03	7.9e-09	-1.6874	2.4029	0.4825	TRUE
		rs968050	C	T	-0.0114273	0.00210113	29.58	4.7e-08	-0.8786	1.6194	0.5874	TRUE
		rs992313	A	G	0.0148038	0.00211712	48.89	1.7e-12	1.0406	1.6354	0.5246	TRUE
hotdrinktemp	SA_superiortemporal	rs10764990	G	A	0.0160406	0.00214701	55.82	5.7e-14	0.6724	2.2757	0.7676	TRUE
		rs10829603	T	G	0.0144656	0.00211301	46.87	3.4e-12	-1.0022	2.1526	0.6415	TRUE
		rs10918383	T	C	0.0134206	0.00246929	29.54	4.9e-08	-1.2457	2.5165	0.6206	TRUE
		rs10949576	A	G	0.0119987	0.00210504	32.49	1.5e-08	0.1229	2.141	0.9542	TRUE
		rs11138794	G	A	-0.0122498	0.00224355	29.81	4.6e-08	-2.6331	2.309	0.2541	TRUE
		rs112203261	C	A	-0.0151421	0.00219519	47.58	5.2e-12	-0.4193	3.3021	0.899	TRUE
		rs112706793	A	G	0.0253007	0.00430775	34.5	3.3e-09	3.2569	4.3532	0.4544	TRUE
		rs1144428	G	A	0.0181658	0.00257892	49.62	2.3e-12	0.8374	2.7448	0.7603	TRUE
		rs11710570	T	C	-0.0124685	0.00210589	35.06	2.5e-09	-3.5819	2.1417	0.09443	TRUE
		rs12197552	C	G	0.0220922	0.0040073	30.39	4e-08	3.115	4.9517	0.5293	TRUE
		rs12418887	A	G	0.0201663	0.00282336	51.02	8.2e-13	-5.7086	2.8663	0.04641	TRUE
		rs1260326	T	C	-0.0130294	0.00214173	37.01	1.4e-09	-3.5251	2.1962	0.1085	TRUE
		rs12607072	G	A	-0.0159479	0.00216414	54.3	2.5e-13	0.802	2.1911	0.7143	TRUE
		rs1326609	G	A	-0.0121333	0.0021717	31.21	2.1e-08	5.5428	2.2102	0.01215	TRUE
		rs133069	A	C	-0.0144745	0.00215853	44.97	1.3e-11	4.554	2.3897	0.05669	TRUE
		rs1430204	T	C	-0.018708	0.00259834	51.84	5.7e-13	7.0156	2.5903	0.006761	TRUE
		rs1447182	T	C	0.0164134	0.00256109	41.07	1.7e-10	1.2231	2.657	0.6453	TRUE
		rs1462855	C	T	0.0140939	0.00212433	44.02	2.4e-11	-1.4344	2.186	0.5117	TRUE
		rs1513475	T	C	-0.0145065	0.0022002	43.47	3.8e-11	2.3488	2.2547	0.2975	TRUE
		rs1519659	G	A	-0.0145943	0.00244595	35.6	3.2e-09	3.8049	2.4738	0.124	TRUE
		rs17409597	T	C	-0.012241	0.00210966	33.67	7.7e-09	-0.8609	2.1685	0.6914	TRUE
		rs17513240	A	T	-0.0163279	0.00277067	34.73	3.2e-09	1.7983	2.7667	0.5157	TRUE
		rs2472297	C	T	-0.0267528	0.00237863	126.5	3.7e-29	-0.9339	2.544	0.7135	TRUE
		rs2551023	A	C	-0.0148365	0.00210657	49.6	2.7e-12	2.932	2.1484	0.1723	TRUE
		rs2702576	A	G	0.0120864	0.00216415	31.19	2e-08	-1.1232	2.1884	0.6078	TRUE
		rs2717046	C	T	-0.0163717	0.00216555	57.15	3.9e-14	0.6844	2.2085	0.7566	TRUE
		rs34292254	G	T	0.0115332	0.00211278	29.8	4.3e-08	-7.0269	2.1471	0.001065	TRUE
		rs34521235	T	C	-0.0146508	0.00263171	30.99	2.6e-08	-5.4331	2.7422	0.04756	TRUE
		rs4271161	T	C	0.01233	0.00225085	30.01	3.8e-08	-1.3555	2.228	0.5429	TRUE
		rs4410790	T	C	-0.0171468	0.00217606	62.09	2.4e-15	0.3028	2.2193	0.8915	TRUE
		rs4451990	A	G	0.0131068	0.00234896	31.13	2.3e-08	2.1203	2.3613	0.3692	TRUE
		rs4529888	G	A	-0.012154	0.00213232	32.49	1e-08	-2.3175	2.1558	0.2824	TRUE
		rs4537651	G	A	0.0115452	0.0021012	30.19	3.2e-08	-1.5311	2.1811	0.4827	TRUE
		rs55880962	G	A	0.0174459	0.00265919	43.04	6e-11	-2.644	2.6864	0.325	TRUE
		rs56143595	G	T	-0.015923	0.00230643	47.66	3.6e-12	1.3054	2.3643	0.5809	TRUE
		rs6581514	G	A	0.012063	0.00209726	33.08	4.9e-09	-1.398	2.1447	0.5145	TRUE
		rs6695785	T	C	0.0160463	0.00211881	57.35	3.7e-14	-0.0469	2.1685	0.9827	TRUE
		rs6871231	C	T	-0.0127891	0.00216663	34.84	4e-09	-1.7027	2.1919	0.4373	TRUE
		rs72636697	C	T	-0.0175683	0.00310227	32.07	1.3e-08	-2.4351	2.8052	0.3854	TRUE
		rs7283775	G	T	0.0136384	0.00232857	34.3	6.4e-09	-2.4381	2.5141	0.3322	TRUE
		rs7618494	A	G	0.0206368	0.00219107	88.71	5.7e-21	-7.5589	2.2507	0.0007837	TRUE
		rs9267445	G	C	-0.0251045	0.00302627	68.82	1.2e-16	-0.9727	3.3702	0.7729	TRUE
		rs9453572	T	C	-0.0134726	0.00222405	36.7	9.6e-10	0.5892	2.298	0.7976	TRUE
		rs9568867	G	A	-0.0181193	0.00315292	33.03	7.9e-09	1.277	3.1847	0.6884	TRUE
		rs968050	C	T	-0.0114273	0.00210113	29.58	4.7e-08	4.0822	2.1445	0.05696	TRUE
		rs992313	A	G	0.0148038	0.00211712	48.89	1.7e-12	0.7496	2.1686	0.7296	TRUE
hotdrinktemp	THICK_parahippocampal	rs10764990	G	A	0.0160406	0.00214701	55.82	5.7e-14	0.0089	0.0025	0.000385	TRUE
		rs10829603	T	G	0.0144656	0.00211301	46.87	3.4e-12	-0.0018	0.0024	0.457	TRUE
		rs10918383	T	C	0.0134206	0.00246929	29.54	4.9e-08	-0.0012	0.0028	0.6694	TRUE
		rs10949576	A	G	0.0119987	0.00210504	32.49	1.5e-08	0.0013	0.0023	0.5743	TRUE
		rs11138794	G	A	-0.0122498	0.00224355	29.81	4.6e-08	0.0004	0.0026	0.8879	TRUE
		rs112203261	C	A	-0.0151421	0.00219519	47.58	5.2e-12	-0.006	0.0036	0.09506	TRUE
		rs112706793	A	G	0.0253007	0.00430775	34.5	3.3e-09	-0.0036	0.0047	0.4417	TRUE
		rs1144428	G	A	0.0181658	0.00257892	49.62	2.3e-12	0.0062	0.003	0.03644	TRUE
		rs11710570	T	C	-0.0124685	0.00210589	35.06	2.5e-09	-0.0022	0.0023	0.3493	TRUE
		rs12197552	C	G	0.0220922	0.0040073	30.39	4e-08	0	0.0054	0.993	TRUE
		rs12418887	A	G	0.0201663	0.00282336	51.02	8.2e-13	0.0026	0.0031	0.4097	TRUE
		rs1260326	T	C	-0.0130294	0.00214173	37.01	1.4e-09	0.0028	0.0024	0.2381	TRUE
		rs12607072	G	A	-0.0159479	0.00216414	54.3	2.5e-13	-0.0006	0.0024	0.8139	TRUE
		rs1326609	G	A	-0.0121333	0.0021717	31.21	2.1e-08	0.0049	0.0024	0.04193	TRUE
		rs133069	A	C	-0.0144745	0.00215853	44.97	1.3e-11	-0.0043	0.0026	0.1036	TRUE
		rs1430204	T	C	-0.018708	0.00259834	51.84	5.7e-13	-0.0023	0.0029	0.4305	TRUE
		rs1447182	T	C	0.0164134	0.00256109	41.07	1.7e-10	-0.0036	0.0029	0.2187	TRUE
		rs1462855	C	T	0.0140939	0.00212433	44.02	2.4e-11	0.0036	0.0024	0.1338	TRUE
		rs1513475	T	C	-0.0145065	0.0022002	43.47	3.8e-11	0.0002	0.0025	0.9415	TRUE
		rs1519659	G	A	-0.0145943	0.00244595	35.6	3.2e-09	-0.0021	0.0027	0.4386	TRUE
		rs17409597	T	C	-0.012241	0.00210966	33.67	7.7e-09	0.001	0.0024	0.6833	TRUE
		rs17513240	A	T	-0.0163279	0.00277067	34.73	3.2e-09	-0.0001	0.003	0.9789	TRUE
		rs2472297	C	T	-0.0267528	0.00237863	126.5	3.7e-29	0.0005	0.0028	0.8457	TRUE
		rs2551023	A	C	-0.0148365	0.00210657	49.6	2.7e-12	-0.0011	0.0024	0.6439	TRUE
		rs2702576	A	G	0.0120864	0.00216415	31.19	2e-08	-0.0019	0.0024	0.4416	TRUE
		rs2717046	C	T	-0.0163717	0.00216555	57.15	3.9e-14	-0.0069	0.0024	0.004398	TRUE
		rs34292254	G	T	0.0115332	0.00211278	29.8	4.3e-08	0.0014	0.0023	0.5429	TRUE
		rs34521235	T	C	-0.0146508	0.00263171	30.99	2.6e-08	0.0019	0.003	0.5192	TRUE
		rs4271161	T	C	0.01233	0.00225085	30.01	3.8e-08	0.0008	0.0025	0.7309	TRUE
		rs4410790	T	C	-0.0171468	0.00217606	62.09	2.4e-15	-0.0005	0.0024	0.8485	TRUE
		rs4451990	A	G	0.0131068	0.00234896	31.13	2.3e-08	0.0031	0.0026	0.2374	TRUE
		rs4529888	G	A	-0.012154	0.00213232	32.49	1e-08	-0.0033	0.0024	0.1672	TRUE
		rs4537651	G	A	0.0115452	0.0021012	30.19	3.2e-08	0.0013	0.0024	0.5976	TRUE
		rs55880962	G	A	0.0174459	0.00265919	43.04	6e-11	-0.0018	0.003	0.5485	TRUE
		rs56143595	G	T	-0.015923	0.00230643	47.66	3.6e-12	-0.003	0.0026	0.2484	TRUE
		rs6581514	G	A	0.012063	0.00209726	33.08	4.9e-09	0.0013	0.0023	0.5872	TRUE
		rs6695785	T	C	0.0160463	0.00211881	57.35	3.7e-14	-0.0031	0.0024	0.1872	TRUE
		rs6871231	C	T	-0.0127891	0.00216663	34.84	4e-09	0.0001	0.0024	0.9645	TRUE
		rs72636697	C	T	-0.0175683	0.00310227	32.07	1.3e-08	0.0009	0.0031	0.7617	TRUE
		rs7283775	G	T	0.0136384	0.00232857	34.3	6.4e-09	-0.0017	0.0028	0.5361	TRUE
		rs7618494	A	G	0.0206368	0.00219107	88.71	5.7e-21	0.0045	0.0025	0.06655	TRUE
		rs9267445	G	C	-0.0251045	0.00302627	68.82	1.2e-16	-0.0052	0.0037	0.1593	TRUE
		rs9453572	T	C	-0.0134726	0.00222405	36.7	9.6e-10	0.0025	0.0025	0.3129	TRUE
		rs9568867	G	A	-0.0181193	0.00315292	33.03	7.9e-09	-0.0041	0.0035	0.2359	TRUE
		rs968050	C	T	-0.0114273	0.00210113	29.58	4.7e-08	-0.0053	0.0023	0.0237	TRUE
		rs992313	A	G	0.0148038	0.00211712	48.89	1.7e-12	0.0005	0.0024	0.8412	TRUE
hotdrinktemp	THICK_rostralmiddlefrontal	rs10764990	G	A	0.0160406	0.00214701	55.82	5.7e-14	0.0011	0.0008	0.1581	TRUE
		rs10829603	T	G	0.0144656	0.00211301	46.87	3.4e-12	0.0004	0.0008	0.6038	TRUE
		rs10918383	T	C	0.0134206	0.00246929	29.54	4.9e-08	0.0014	0.0009	0.1102	TRUE
		rs10949576	A	G	0.0119987	0.00210504	32.49	1.5e-08	0.0024	0.0007	0.001593	TRUE
		rs11138794	G	A	-0.0122498	0.00224355	29.81	4.6e-08	-0.0012	0.0008	0.1551	TRUE
		rs112203261	C	A	-0.0151421	0.00219519	47.58	5.2e-12	-0.0012	0.0012	0.3214	TRUE
		rs112706793	A	G	0.0253007	0.00430775	34.5	3.3e-09	0.003	0.0015	0.04564	TRUE
		rs1144428	G	A	0.0181658	0.00257892	49.62	2.3e-12	-0.0008	0.0009	0.4077	TRUE
		rs11710570	T	C	-0.0124685	0.00210589	35.06	2.5e-09	0.0012	0.0007	0.116	TRUE
		rs12197552	C	G	0.0220922	0.0040073	30.39	4e-08	0.0016	0.0017	0.3647	TRUE
		rs12418887	A	G	0.0201663	0.00282336	51.02	8.2e-13	0.0003	0.001	0.7724	TRUE
		rs1260326	T	C	-0.0130294	0.00214173	37.01	1.4e-09	0.0003	0.0008	0.6505	TRUE
		rs12607072	G	A	-0.0159479	0.00216414	54.3	2.5e-13	0.0004	0.0008	0.6338	TRUE
		rs1326609	G	A	-0.0121333	0.0021717	31.21	2.1e-08	0.0003	0.0008	0.6678	TRUE
		rs133069	A	C	-0.0144745	0.00215853	44.97	1.3e-11	-0.0003	0.0008	0.7221	TRUE
		rs1430204	T	C	-0.018708	0.00259834	51.84	5.7e-13	-0.0009	0.0009	0.309	TRUE
		rs1447182	T	C	0.0164134	0.00256109	41.07	1.7e-10	-0.0012	0.0009	0.2089	TRUE
		rs1462855	C	T	0.0140939	0.00212433	44.02	2.4e-11	0.0002	0.0008	0.8405	TRUE
		rs1513475	T	C	-0.0145065	0.0022002	43.47	3.8e-11	0	0.0008	0.9792	TRUE
		rs1519659	G	A	-0.0145943	0.00244595	35.6	3.2e-09	-0.0009	0.0009	0.2858	TRUE
		rs17409597	T	C	-0.012241	0.00210966	33.67	7.7e-09	0.0003	0.0008	0.6713	TRUE
		rs17513240	A	T	-0.0163279	0.00277067	34.73	3.2e-09	0	0.001	0.9737	TRUE
		rs2472297	C	T	-0.0267528	0.00237863	126.5	3.7e-29	-0.0005	0.0009	0.6031	TRUE
		rs2551023	A	C	-0.0148365	0.00210657	49.6	2.7e-12	-0.0013	0.0007	0.072	TRUE
		rs2702576	A	G	0.0120864	0.00216415	31.19	2e-08	0.0011	0.0008	0.1607	TRUE
		rs2717046	C	T	-0.0163717	0.00216555	57.15	3.9e-14	-0.0011	0.0008	0.1424	TRUE
		rs34292254	G	T	0.0115332	0.00211278	29.8	4.3e-08	0.0004	0.0007	0.6141	TRUE
		rs34521235	T	C	-0.0146508	0.00263171	30.99	2.6e-08	0.0007	0.001	0.4797	TRUE
		rs4271161	T	C	0.01233	0.00225085	30.01	3.8e-08	0.0008	0.0008	0.3012	TRUE
		rs4410790	T	C	-0.0171468	0.00217606	62.09	2.4e-15	-0.0007	0.0008	0.3362	TRUE
		rs4451990	A	G	0.0131068	0.00234896	31.13	2.3e-08	-0.0013	0.0008	0.1099	TRUE
		rs4529888	G	A	-0.012154	0.00213232	32.49	1e-08	0.0014	0.0008	0.06676	TRUE
		rs4537651	G	A	0.0115452	0.0021012	30.19	3.2e-08	0.0012	0.0008	0.119	TRUE
		rs55880962	G	A	0.0174459	0.00265919	43.04	6e-11	0.0015	0.0009	0.1012	TRUE
		rs56143595	G	T	-0.015923	0.00230643	47.66	3.6e-12	0.001	0.0008	0.2168	TRUE
		rs6581514	G	A	0.012063	0.00209726	33.08	4.9e-09	0.0009	0.0007	0.2288	TRUE
		rs6695785	T	C	0.0160463	0.00211881	57.35	3.7e-14	0.0011	0.0008	0.1407	TRUE
		rs6871231	C	T	-0.0127891	0.00216663	34.84	4e-09	0.0009	0.0008	0.2486	TRUE
		rs72636697	C	T	-0.0175683	0.00310227	32.07	1.3e-08	0.0011	0.001	0.2654	TRUE
		rs7283775	G	T	0.0136384	0.00232857	34.3	6.4e-09	0	0.0009	0.9723	TRUE
		rs7618494	A	G	0.0206368	0.00219107	88.71	5.7e-21	0.0006	0.0008	0.474	TRUE
		rs9267445	G	C	-0.0251045	0.00302627	68.82	1.2e-16	0.001	0.0012	0.3797	TRUE
		rs9453572	T	C	-0.0134726	0.00222405	36.7	9.6e-10	-0.0001	0.0008	0.8719	TRUE
		rs9568867	G	A	-0.0181193	0.00315292	33.03	7.9e-09	-0.0009	0.0011	0.4019	TRUE
		rs968050	C	T	-0.0114273	0.00210113	29.58	4.7e-08	-0.0005	0.0007	0.4817	TRUE
		rs992313	A	G	0.0148038	0.00211712	48.89	1.7e-12	-0.0007	0.0008	0.3473	TRUE
milk_typeused_bin5	SA_parsopercularis	rs1421085	T	C	0.0117184	0.00140936	69.13	9.1e-17	2.0647	1.6416	0.2085	TRUE
		rs1629802	G	A	-0.0084107	0.0014408	34.08	5.6e-09	0.4968	1.6812	0.7676	TRUE
		rs2613508	C	T	0.0109083	0.00174072	39.27	3.9e-10	2.7865	2.0824	0.1809	TRUE
		rs35184771	G	T	0.00827248	0.00144611	32.72	1.1e-08	0.0297	1.7116	0.9862	TRUE
		rs72783765	C	T	0.0136309	0.00242312	31.64	1.9e-08	4.032	2.8136	0.1518	TRUE
milk_typeused_bin5	SA_parstriangularis	rs1421085	T	C	0.0117184	0.00140936	69.13	9.1e-17	1.0396	1.5249	0.4954	TRUE
		rs1629802	G	A	-0.0084107	0.0014408	34.08	5.6e-09	0.7283	1.5625	0.6411	TRUE
		rs2613508	C	T	0.0109083	0.00174072	39.27	3.9e-10	2.8214	1.934	0.1446	TRUE
		rs35184771	G	T	0.00827248	0.00144611	32.72	1.1e-08	3.5081	1.5914	0.02749	TRUE
		rs72783765	C	T	0.0136309	0.00242312	31.64	1.9e-08	3.882	2.6103	0.137	TRUE
milk_typeused_bin5	SA_precentral	rs1421085	T	C	0.0117184	0.00140936	69.13	9.1e-17	-7.3754	3.0094	0.01425	TRUE
		rs1629802	G	A	-0.0084107	0.0014408	34.08	5.6e-09	-0.6262	3.086	0.8392	TRUE
		rs2613508	C	T	0.0109083	0.00174072	39.27	3.9e-10	-2.3954	3.8176	0.5304	TRUE
		rs35184771	G	T	0.00827248	0.00144611	32.72	1.1e-08	-6.6448	3.1451	0.03462	TRUE
		rs72783765	C	T	0.0136309	0.00242312	31.64	1.9e-08	-5.3181	5.1691	0.3036	TRUE
milk_typeused_bin5	SA_supramarginal	rs1421085	T	C	0.0117184	0.00140936	69.13	9.1e-17	2.0962	3.0115	0.4864	TRUE
		rs1629802	G	A	-0.0084107	0.0014408	34.08	5.6e-09	-1.676	3.0865	0.5871	TRUE
		rs2613508	C	T	0.0109083	0.00174072	39.27	3.9e-10	6.3685	3.8276	0.09615	TRUE
		rs35184771	G	T	0.00827248	0.00144611	32.72	1.1e-08	2.2018	3.141	0.4833	TRUE
		rs72783765	C	T	0.0136309	0.00242312	31.64	1.9e-08	4.8812	5.1572	0.3439	TRUE
milk_typeused_bin5	THICK_entorhinal	rs1421085	T	C	0.0117184	0.00140936	69.13	9.1e-17	0.0018	0.0029	0.5296	TRUE
		rs1629802	G	A	-0.0084107	0.0014408	34.08	5.6e-09	-0.0005	0.0029	0.8765	TRUE
		rs2613508	C	T	0.0109083	0.00174072	39.27	3.9e-10	0.0005	0.0037	0.8879	TRUE
		rs35184771	G	T	0.00827248	0.00144611	32.72	1.1e-08	0.0012	0.003	0.6829	TRUE
		rs72783765	C	T	0.0136309	0.00242312	31.64	1.9e-08	0.004	0.0049	0.4171	TRUE
milk_typeused_bin5	THICK_insula	rs1421085	T	C	0.0117184	0.00140936	69.13	9.1e-17	-0.001	0.0011	0.3874	TRUE
		rs1629802	G	A	-0.0084107	0.0014408	34.08	5.6e-09	0.0007	0.0011	0.5558	TRUE
		rs2613508	C	T	0.0109083	0.00174072	39.27	3.9e-10	-0.0014	0.0014	0.3135	TRUE
		rs35184771	G	T	0.00827248	0.00144611	32.72	1.1e-08	-0.0001	0.0012	0.9459	TRUE
		rs72783765	C	T	0.0136309	0.00242312	31.64	1.9e-08	-0.0009	0.0019	0.6447	TRUE
milk_typeused_bin5	THICK_isthmuscingulate	rs1421085	T	C	0.0117184	0.00140936	69.13	9.1e-17	0.0033	0.0015	0.03175	TRUE
		rs1629802	G	A	-0.0084107	0.0014408	34.08	5.6e-09	0.0003	0.0016	0.8598	TRUE
		rs2613508	C	T	0.0109083	0.00174072	39.27	3.9e-10	0.0004	0.002	0.8234	TRUE
		rs35184771	G	T	0.00827248	0.00144611	32.72	1.1e-08	0.0013	0.0016	0.4318	TRUE
		rs72783765	C	T	0.0136309	0.00242312	31.64	1.9e-08	0.0018	0.0026	0.4962	TRUE
milk_typeused_bin5	THICK_precuneus	rs1421085	T	C	0.0117184	0.00140936	69.13	9.1e-17	-0.0004	0.0007	0.5575	TRUE
		rs1629802	G	A	-0.0084107	0.0014408	34.08	5.6e-09	0.0005	0.0007	0.5292	TRUE
		rs2613508	C	T	0.0109083	0.00174072	39.27	3.9e-10	-0.0003	0.0009	0.7201	TRUE
		rs35184771	G	T	0.00827248	0.00144611	32.72	1.1e-08	-0.0004	0.0007	0.5943	TRUE
		rs72783765	C	T	0.0136309	0.00242312	31.64	1.9e-08	-0.0008	0.0012	0.5236	TRUE
milk_typeused_bin9	SA_bankssts	rs11152213	A	C	-0.0138512	0.00243983	32.23	1.6e-08	-1.6916	1.1654	0.1466	TRUE
		rs11209948	G	T	-0.0123277	0.00211464	33.99	5.4e-09	-0.3835	1.0379	0.7118	TRUE
		rs136872	A	G	0.0212594	0.0034883	37.14	9.1e-10	-0.1084	2.0169	0.9571	TRUE
		rs3817334	C	T	-0.0123674	0.00210425	34.54	3.8e-09	0.2257	1.0233	0.8254	TRUE
		rs55872725	C	T	-0.0191323	0.00211201	82.06	1.4e-19	-1.3683	1.0219	0.1805	TRUE
milk_typeused_bin9	SA_lingual	rs11152213	A	C	-0.0138512	0.00243983	32.23	1.6e-08	1.6491	3.1	0.5947	TRUE
		rs11209948	G	T	-0.0123277	0.00211464	33.99	5.4e-09	-0.1973	2.7596	0.943	TRUE
		rs136872	A	G	0.0212594	0.0034883	37.14	9.1e-10	-3.201	5.3356	0.5486	TRUE
		rs3817334	C	T	-0.0123674	0.00210425	34.54	3.8e-09	2.6368	2.7236	0.333	TRUE
		rs55872725	C	T	-0.0191323	0.00211201	82.06	1.4e-19	2.2739	2.7168	0.4026	TRUE
milk_typeused_bin9	SA_precentral	rs11152213	A	C	-0.0138512	0.00243983	32.23	1.6e-08	-2.563	3.4425	0.4566	TRUE
		rs11209948	G	T	-0.0123277	0.00211464	33.99	5.4e-09	-3.0603	3.0626	0.3177	TRUE
		rs136872	A	G	0.0212594	0.0034883	37.14	9.1e-10	-3.2629	6.0183	0.5877	TRUE
		rs3817334	C	T	-0.0123674	0.00210425	34.54	3.8e-09	-5.3278	3.0199	0.0777	TRUE
		rs55872725	C	T	-0.0191323	0.00211201	82.06	1.4e-19	-7.0743	3.0065	0.01862	TRUE
milk_typeused_bin9	SA_superiorfrontal	rs11152213	A	C	-0.0138512	0.00243983	32.23	1.6e-08	-0.1134	4.1804	0.9784	TRUE
		rs11209948	G	T	-0.0123277	0.00211464	33.99	5.4e-09	-2.9212	3.7176	0.432	TRUE
		rs136872	A	G	0.0212594	0.0034883	37.14	9.1e-10	1.9233	7.3063	0.7924	TRUE
		rs3817334	C	T	-0.0123674	0.00210425	34.54	3.8e-09	-4.3071	3.6738	0.241	TRUE
		rs55872725	C	T	-0.0191323	0.00211201	82.06	1.4e-19	-4.9421	3.6602	0.1769	TRUE
milk_typeused_bin9	SA_supramarginal	rs11152213	A	C	-0.0138512	0.00243983	32.23	1.6e-08	1.0066	3.4393	0.7698	TRUE
		rs11209948	G	T	-0.0123277	0.00211464	33.99	5.4e-09	-0.1302	3.0633	0.9661	TRUE
		rs136872	A	G	0.0212594	0.0034883	37.14	9.1e-10	0.9337	6.0049	0.8764	TRUE
		rs3817334	C	T	-0.0123674	0.00210425	34.54	3.8e-09	2.3534	3.0176	0.4355	TRUE
		rs55872725	C	T	-0.0191323	0.00211201	82.06	1.4e-19	2.0246	3.0088	0.501	TRUE
milk_typeused_bin9	THICK_entorhinal	rs11152213	A	C	-0.0138512	0.00243983	32.23	1.6e-08	0.0045	0.0033	0.1687	TRUE
		rs11209948	G	T	-0.0123277	0.00211464	33.99	5.4e-09	0.0008	0.0029	0.7721	TRUE
		rs136872	A	G	0.0212594	0.0034883	37.14	9.1e-10	-0.0037	0.0056	0.5128	TRUE
		rs3817334	C	T	-0.0123674	0.00210425	34.54	3.8e-09	0.0013	0.0029	0.6512	TRUE
		rs55872725	C	T	-0.0191323	0.00211201	82.06	1.4e-19	0.0019	0.0029	0.4996	TRUE
milk_typeused_bin9	THICK_parsopercularis	rs11152213	A	C	-0.0138512	0.00243983	32.23	1.6e-08	-0.0005	0.001	0.6034	TRUE
		rs11209948	G	T	-0.0123277	0.00211464	33.99	5.4e-09	-0.0016	0.0009	0.07598	TRUE
		rs136872	A	G	0.0212594	0.0034883	37.14	9.1e-10	-0.0001	0.0018	0.938	TRUE
		rs3817334	C	T	-0.0123674	0.00210425	34.54	3.8e-09	0.0002	0.0009	0.8046	TRUE
		rs55872725	C	T	-0.0191323	0.00211201	82.06	1.4e-19	-0.0011	0.0009	0.1879	TRUE
milk_typeused_bin9	THICK_parstriangularis	rs11152213	A	C	-0.0138512	0.00243983	32.23	1.6e-08	-0.0009	0.0011	0.3784	TRUE
		rs11209948	G	T	-0.0123277	0.00211464	33.99	5.4e-09	0.0001	0.001	0.9355	TRUE
		rs136872	A	G	0.0212594	0.0034883	37.14	9.1e-10	0.0011	0.0019	0.5565	TRUE
		rs3817334	C	T	-0.0123674	0.00210425	34.54	3.8e-09	0.0002	0.0009	0.8105	TRUE
		rs55872725	C	T	-0.0191323	0.00211201	82.06	1.4e-19	-0.0014	0.0009	0.127	TRUE
milk_typeused_bin9	THICK_postcentral	rs11152213	A	C	-0.0138512	0.00243983	32.23	1.6e-08	0.0002	0.0009	0.8401	TRUE
		rs11209948	G	T	-0.0123277	0.00211464	33.99	5.4e-09	-0.0002	0.0008	0.7588	TRUE
		rs136872	A	G	0.0212594	0.0034883	37.14	9.1e-10	0.0009	0.0016	0.5679	TRUE
		rs3817334	C	T	-0.0123674	0.00210425	34.54	3.8e-09	-0.0002	0.0008	0.8268	TRUE
		rs55872725	C	T	-0.0191323	0.00211201	82.06	1.4e-19	-0.0008	0.0008	0.2951	TRUE
nonoilyfish_overallfreq	SA_postcentral	rs11680516	T	C	-0.0157356	0.00264097	35.5	2.8e-09	-2.7048	3.3408	0.4182	TRUE
		rs12555454	T	C	-0.0121342	0.00219279	30.62	3.3e-08	0.3768	2.6497	0.8869	TRUE
		rs1260326	T	C	0.012429	0.00215901	33.14	1.2e-08	1.1685	2.5634	0.6485	TRUE
		rs1951283	G	A	0.0117454	0.00214805	29.9	4.6e-08	-1.8531	2.5725	0.4713	TRUE
		rs35287743	G	T	0.0209583	0.00331875	39.88	3.3e-10	0.9472	4.0514	0.8151	TRUE
		rs3799077	T	G	0.0139668	0.00229088	37.17	9.7e-10	2.8579	2.7146	0.2924	TRUE
		rs56094641	A	G	-0.0158595	0.00215107	54.36	1.5e-13	-1.5731	2.5292	0.534	TRUE
		rs6957745	T	C	0.0162396	0.00263403	38.01	6.6e-10	4.1403	3.2766	0.2064	TRUE
		rs7326846	C	T	-0.0127061	0.00231815	30.04	4.3e-08	-3.6476	2.8132	0.1948	TRUE
		rs838133	A	G	-0.0213091	0.00218724	94.92	2e-22	0.5921	3.224	0.8543	TRUE
		rs9276710	T	C	0.014978	0.00263717	32.26	1.2e-08	2.6717	4.0965	0.5143	TRUE
nonoilyfish_overallfreq	THICK_middletemporal	rs11680516	T	C	-0.0157356	0.00264097	35.5	2.8e-09	0.0009	0.0012	0.48	TRUE
		rs12555454	T	C	-0.0121342	0.00219279	30.62	3.3e-08	0.0013	0.001	0.2053	TRUE
		rs1260326	T	C	0.012429	0.00215901	33.14	1.2e-08	-0.0005	0.001	0.6114	TRUE
		rs1951283	G	A	0.0117454	0.00214805	29.9	4.6e-08	0.0012	0.001	0.2133	TRUE
		rs35287743	G	T	0.0209583	0.00331875	39.88	3.3e-10	-0.0011	0.0015	0.479	TRUE
		rs3799077	T	G	0.0139668	0.00229088	37.17	9.7e-10	-0.0004	0.001	0.668	TRUE
		rs56094641	A	G	-0.0158595	0.00215107	54.36	1.5e-13	0.0005	0.0009	0.5949	TRUE
		rs6957745	T	C	0.0162396	0.00263403	38.01	6.6e-10	0.0002	0.0012	0.8598	TRUE
		rs7326846	C	T	-0.0127061	0.00231815	30.04	4.3e-08	0.0001	0.0011	0.9168	TRUE
		rs838133	A	G	-0.0213091	0.00218724	94.92	2e-22	0.0027	0.0012	0.02621	TRUE
		rs9276710	T	C	0.014978	0.00263717	32.26	1.2e-08	-0.0024	0.0015	0.1099	TRUE
nonoilyfish_overallfreq	THICK_paracentral	rs11680516	T	C	-0.0157356	0.00264097	35.5	2.8e-09	0.0008	0.0013	0.5239	TRUE
		rs12555454	T	C	-0.0121342	0.00219279	30.62	3.3e-08	0.0003	0.001	0.7783	TRUE
		rs1260326	T	C	0.012429	0.00215901	33.14	1.2e-08	-0.0014	0.001	0.164	TRUE
		rs1951283	G	A	0.0117454	0.00214805	29.9	4.6e-08	-0.0012	0.001	0.2146	TRUE
		rs35287743	G	T	0.0209583	0.00331875	39.88	3.3e-10	0.0022	0.0016	0.159	TRUE
		rs3799077	T	G	0.0139668	0.00229088	37.17	9.7e-10	0.0005	0.001	0.6068	TRUE
		rs56094641	A	G	-0.0158595	0.00215107	54.36	1.5e-13	0.0012	0.001	0.2184	TRUE
		rs6957745	T	C	0.0162396	0.00263403	38.01	6.6e-10	0.0004	0.0013	0.7573	TRUE
		rs7326846	C	T	-0.0127061	0.00231815	30.04	4.3e-08	0.0023	0.0011	0.03429	TRUE
		rs838133	A	G	-0.0213091	0.00218724	94.92	2e-22	0.0017	0.0012	0.1818	TRUE
		rs9276710	T	C	0.014978	0.00263717	32.26	1.2e-08	-0.0008	0.0016	0.6105	TRUE
oilyfish_overallfreq	SA_entorhinal	rs10828266	A	G	-0.0231811	0.00234068	98.08	2.4e-23	-1.5459	0.6579	0.01878	TRUE
		rs11233632	C	T	0.0131768	0.00213372	38.14	7.9e-10	0.127	0.5989	0.832	TRUE
		rs113230003	G	A	0.0151326	0.00241883	39.14	5.6e-10	0.9608	0.7207	0.1825	TRUE
		rs114497213	G	T	-0.0294359	0.00468013	39.56	4.3e-10	1.6522	1.5111	0.2742	TRUE
		rs11650214	G	A	0.0178743	0.00305521	34.23	4.1e-09	0.2858	0.8843	0.7465	TRUE
		rs11767283	A	G	-0.0190181	0.0025538	55.46	6.2e-14	0.718	0.8518	0.3993	TRUE
		rs11859365	A	C	-0.0240106	0.0024185	98.56	2.6e-23	0.3623	0.6919	0.6005	TRUE
		rs11993089	G	T	-0.0177512	0.0021478	68.31	1.6e-16	-0.6796	0.6071	0.263	TRUE
		rs12456049	A	G	0.0133454	0.00212045	39.61	2.2e-10	0.4335	0.5952	0.4664	TRUE
		rs12497285	T	C	-0.0119768	0.00218651	30	4.4e-08	0.6492	0.6201	0.2951	TRUE
		rs12666221	T	G	0.015431	0.00274318	31.64	1.9e-08	0.1916	0.8039	0.8116	TRUE
		rs12806161	G	A	0.0121992	0.00214002	32.5	6e-09	0.8121	0.6121	0.1846	TRUE
		rs12826749	C	G	0.0117437	0.00213934	30.13	3e-08	-0.6321	0.6241	0.3112	FALSE
		rs12855717	C	T	0.0119744	0.00211653	32.01	1.4e-08	0.7114	0.61	0.2435	TRUE
		rs12896749	G	C	0.0118127	0.00216417	29.79	4.8e-08	0.5424	0.626	0.3862	TRUE
		rs13077466	A	G	0.0125531	0.00227576	30.43	3.4e-08	-0.4087	0.6582	0.5346	TRUE
		rs1371272	G	A	-0.0178252	0.00305537	34.04	4.7e-09	0.8752	0.8652	0.3118	TRUE
		rs1421085	T	C	-0.0192044	0.00214606	80.08	2.1e-19	0.3164	0.6021	0.5993	TRUE
		rs144696853	A	G	0.0170615	0.00311181	30.06	3.1e-08	1.715	1.1667	0.1416	TRUE
		rs17050031	C	T	0.013742	0.00211432	42.24	5.1e-11	0.0414	0.5966	0.9446	TRUE
		rs183280845	G	A	0.0269065	0.00336742	63.84	1.3e-15	0.4288	1.2162	0.7244	TRUE
		rs1876245	T	C	-0.0144748	0.00212608	46.35	7.7e-12	-1.5803	0.5932	0.007724	TRUE
		rs1992284	T	C	0.0132954	0.00239368	30.85	2.6e-08	-0.1255	0.7052	0.8588	TRUE
		rs2039501	A	G	-0.0119751	0.00210671	32.31	6.6e-09	0.179	0.5926	0.7626	TRUE
		rs2400095	C	T	0.0116897	0.00215074	29.54	3.9e-08	0.1098	0.608	0.8567	TRUE
		rs2413045	A	G	0.0222317	0.0026423	70.79	3e-17	0.5117	0.7832	0.5135	TRUE
		rs2596655	G	A	0.0123228	0.00213261	33.39	4.3e-09	-1.1053	0.5947	0.06311	TRUE
		rs2614945	T	A	0.0144373	0.00216252	44.57	2.9e-11	0.3795	0.6061	0.5312	TRUE
		rs28533540	G	A	-0.0160449	0.00212029	57.26	2.4e-14	-0.7684	0.5936	0.1955	TRUE
		rs303825	G	A	-0.0147251	0.00244529	36.26	1.9e-09	-0.7392	0.6898	0.2839	TRUE
		rs3124402	A	G	0.0228328	0.00237439	92.47	6.3e-22	-0.1343	0.6602	0.8388	TRUE
		rs35287743	G	T	0.0298463	0.00330883	81.36	1.9e-19	0.1588	0.9617	0.8688	TRUE
		rs4002471	C	T	0.0207387	0.00212675	95.09	2.4e-22	-0.0808	0.6102	0.8947	TRUE
		rs4274714	C	T	-0.0127506	0.00215063	35.15	2.7e-09	-0.0207	0.6184	0.9733	TRUE
		rs45501495	C	T	-0.0167869	0.00248501	45.63	1.9e-11	-1.3767	0.6846	0.04431	TRUE
		rs480293	A	C	0.0152669	0.00232482	43.12	4.3e-11	-0.2686	0.6508	0.6798	TRUE
		rs4821724	C	T	-0.0120113	0.00214425	31.38	1.3e-08	-0.3102	0.6062	0.6089	TRUE
		rs4869859	T	C	-0.0162639	0.00211776	58.98	1.5e-14	-1.7742	0.5993	0.003073	TRUE
		rs552234	G	A	0.0137773	0.0021067	42.77	5.8e-11	0.6313	0.5878	0.2828	TRUE
		rs55871839	T	C	-0.0125597	0.00214889	34.16	3.5e-09	-1.025	0.6029	0.08912	TRUE
		rs55985303	G	A	-0.0142253	0.00246407	33.33	7e-09	-0.7401	0.6915	0.2845	TRUE
		rs6033437	C	A	-0.0148663	0.00243718	37.21	1.1e-09	-1.4924	0.6965	0.03213	TRUE
		rs6089752	C	T	0.0122397	0.00211326	33.55	6.6e-09	-1.609	0.6385	0.01174	TRUE
		rs61882679	G	T	-0.0218474	0.00376481	33.68	7.4e-09	-0.0833	1.0972	0.9395	TRUE
		rs62170022	C	T	-0.0136226	0.00222862	37.36	8.4e-10	0.1698	0.7079	0.8105	TRUE
		rs6465487	A	G	0.0135521	0.00215346	39.6	4.3e-10	0.8335	0.6071	0.1698	TRUE
		rs6807666	A	C	0.0149938	0.00220198	46.37	9.3e-12	0.2318	0.6213	0.7091	TRUE
		rs7148387	A	G	0.0159962	0.00214328	55.7	6.2e-14	0.4957	0.6146	0.4199	TRUE
		rs7687957	T	C	-0.0121515	0.00220425	30.39	3.6e-08	0.9699	0.6349	0.1266	TRUE
		rs7924937	C	T	-0.0125498	0.00220843	32.29	1.4e-08	-0.0353	0.6082	0.9537	TRUE
		rs809339	A	G	-0.0176104	0.00248744	50.12	1.5e-12	-0.042	0.7003	0.9521	TRUE
		rs9597870	T	G	0.0143506	0.0024556	34.15	4.3e-09	-0.9642	0.7033	0.1704	TRUE
		rs9841174	T	C	-0.016852	0.00217931	59.8	2.2e-14	-0.0279	0.6071	0.9633	TRUE
		rs9889161	G	T	0.0147829	0.0022029	45.03	1.7e-11	0.0561	0.6416	0.9304	TRUE
oilyfish_overallfreq	THICK_caudalanteriorcingulate	rs10828266	A	G	-0.0231811	0.00234068	98.08	2.4e-23	0.0019	0.0019	0.3187	TRUE
		rs11233632	C	T	0.0131768	0.00213372	38.14	7.9e-10	0	0.0018	0.9799	TRUE
		rs113230003	G	A	0.0151326	0.00241883	39.14	5.6e-10	0.0036	0.0022	0.09105	TRUE
		rs114497213	G	T	-0.0294359	0.00468013	39.56	4.3e-10	-0.0063	0.0045	0.1633	TRUE
		rs11650214	G	A	0.0178743	0.00305521	34.23	4.1e-09	-0.0028	0.0026	0.2908	TRUE
		rs11767283	A	G	-0.0190181	0.0025538	55.46	6.2e-14	-0.0011	0.0025	0.6656	TRUE
		rs11859365	A	C	-0.0240106	0.0024185	98.56	2.6e-23	0.0051	0.0021	0.01497	TRUE
		rs11993089	G	T	-0.0177512	0.0021478	68.31	1.6e-16	0.0019	0.0018	0.2855	TRUE
		rs12456049	A	G	0.0133454	0.00212045	39.61	2.2e-10	-0.0007	0.0018	0.7019	TRUE
		rs12497285	T	C	-0.0119768	0.00218651	30	4.4e-08	0.0005	0.0019	0.7845	TRUE
		rs12666221	T	G	0.015431	0.00274318	31.64	1.9e-08	0.0004	0.0024	0.8673	TRUE
		rs12806161	G	A	0.0121992	0.00214002	32.5	6e-09	0.0017	0.0018	0.3579	TRUE
		rs12826749	C	G	0.0117437	0.00213934	30.13	3e-08	0.0005	0.0019	0.7765	FALSE
		rs12855717	C	T	0.0119744	0.00211653	32.01	1.4e-08	0.0013	0.0018	0.4906	TRUE
		rs12896749	G	C	0.0118127	0.00216417	29.79	4.8e-08	-0.0024	0.0019	0.193	TRUE
		rs13077466	A	G	0.0125531	0.00227576	30.43	3.4e-08	-0.0009	0.002	0.6543	TRUE
		rs1371272	G	A	-0.0178252	0.00305537	34.04	4.7e-09	0.0015	0.0026	0.5562	TRUE
		rs1421085	T	C	-0.0192044	0.00214606	80.08	2.1e-19	0.0001	0.0018	0.9365	TRUE
		rs144696853	A	G	0.0170615	0.00311181	30.06	3.1e-08	0.0061	0.0035	0.08214	TRUE
		rs17050031	C	T	0.013742	0.00211432	42.24	5.1e-11	0.0027	0.0018	0.128	TRUE
		rs183280845	G	A	0.0269065	0.00336742	63.84	1.3e-15	-0.0047	0.0038	0.215	TRUE
		rs1876245	T	C	-0.0144748	0.00212608	46.35	7.7e-12	0.0007	0.0018	0.6802	TRUE
		rs1992284	T	C	0.0132954	0.00239368	30.85	2.6e-08	-0.0015	0.0021	0.4698	TRUE
		rs2039501	A	G	-0.0119751	0.00210671	32.31	6.6e-09	-0.002	0.0018	0.2589	TRUE
		rs2400095	C	T	0.0116897	0.00215074	29.54	3.9e-08	-0.0024	0.0018	0.1842	TRUE
		rs2413045	A	G	0.0222317	0.0026423	70.79	3e-17	-0.0005	0.0023	0.8145	TRUE
		rs2596655	G	A	0.0123228	0.00213261	33.39	4.3e-09	0.0002	0.0018	0.8962	TRUE
		rs2614945	T	A	0.0144373	0.00216252	44.57	2.9e-11	-0.0009	0.0018	0.6116	TRUE
		rs28533540	G	A	-0.0160449	0.00212029	57.26	2.4e-14	0.0045	0.0018	0.01135	TRUE
		rs303825	G	A	-0.0147251	0.00244529	36.26	1.9e-09	0	0.0021	0.9829	TRUE
		rs3124402	A	G	0.0228328	0.00237439	92.47	6.3e-22	-0.0048	0.002	0.01468	TRUE
		rs35287743	G	T	0.0298463	0.00330883	81.36	1.9e-19	0.0009	0.0029	0.7409	TRUE
		rs4002471	C	T	0.0207387	0.00212675	95.09	2.4e-22	-0.0026	0.0018	0.149	TRUE
		rs4274714	C	T	-0.0127506	0.00215063	35.15	2.7e-09	0.0028	0.0018	0.1233	TRUE
		rs45501495	C	T	-0.0167869	0.00248501	45.63	1.9e-11	0.004	0.002	0.05238	TRUE
		rs480293	A	C	0.0152669	0.00232482	43.12	4.3e-11	-0.0025	0.002	0.1959	TRUE
		rs4821724	C	T	-0.0120113	0.00214425	31.38	1.3e-08	0.0037	0.0018	0.04216	TRUE
		rs4869859	T	C	-0.0162639	0.00211776	58.98	1.5e-14	-0.0001	0.0018	0.977	TRUE
		rs552234	G	A	0.0137773	0.0021067	42.77	5.8e-11	-0.0005	0.0018	0.7598	TRUE
		rs55871839	T	C	-0.0125597	0.00214889	34.16	3.5e-09	0.0003	0.0018	0.8524	TRUE
		rs55985303	G	A	-0.0142253	0.00246407	33.33	7e-09	-0.0007	0.0021	0.7175	TRUE
		rs6033437	C	A	-0.0148663	0.00243718	37.21	1.1e-09	-0.0034	0.0021	0.1074	TRUE
		rs6089752	C	T	0.0122397	0.00211326	33.55	6.6e-09	0.0008	0.0019	0.6778	TRUE
		rs61882679	G	T	-0.0218474	0.00376481	33.68	7.4e-09	0.0001	0.0032	0.9819	TRUE
		rs62170022	C	T	-0.0136226	0.00222862	37.36	8.4e-10	-0.0042	0.0021	0.04818	TRUE
		rs6465487	A	G	0.0135521	0.00215346	39.6	4.3e-10	-0.001	0.0018	0.5886	TRUE
		rs6807666	A	C	0.0149938	0.00220198	46.37	9.3e-12	0.0013	0.0019	0.488	TRUE
		rs7148387	A	G	0.0159962	0.00214328	55.7	6.2e-14	-0.0036	0.0018	0.04833	TRUE
		rs7687957	T	C	-0.0121515	0.00220425	30.39	3.6e-08	0.0011	0.0019	0.5497	TRUE
		rs7924937	C	T	-0.0125498	0.00220843	32.29	1.4e-08	0.0014	0.0018	0.4344	TRUE
		rs809339	A	G	-0.0176104	0.00248744	50.12	1.5e-12	0.0012	0.0021	0.5562	TRUE
		rs9597870	T	G	0.0143506	0.0024556	34.15	4.3e-09	-0.0003	0.0021	0.8951	TRUE
		rs9841174	T	C	-0.016852	0.00217931	59.8	2.2e-14	0.0007	0.0018	0.6921	TRUE
		rs9889161	G	T	0.0147829	0.0022029	45.03	1.7e-11	0.0035	0.0019	0.06609	TRUE
oilyfish_overallfreq	THICK_caudalmiddlefrontal	rs10828266	A	G	-0.0231811	0.00234068	98.08	2.4e-23	-0.0013	0.0009	0.1516	TRUE
		rs11233632	C	T	0.0131768	0.00213372	38.14	7.9e-10	0.0002	0.0009	0.7799	TRUE
		rs113230003	G	A	0.0151326	0.00241883	39.14	5.6e-10	0.0024	0.001	0.01802	TRUE
		rs114497213	G	T	-0.0294359	0.00468013	39.56	4.3e-10	0.0023	0.0021	0.2909	TRUE
		rs11650214	G	A	0.0178743	0.00305521	34.23	4.1e-09	0.001	0.0012	0.435	TRUE
		rs11767283	A	G	-0.0190181	0.0025538	55.46	6.2e-14	0.001	0.0012	0.381	TRUE
		rs11859365	A	C	-0.0240106	0.0024185	98.56	2.6e-23	-0.001	0.001	0.3234	TRUE
		rs11993089	G	T	-0.0177512	0.0021478	68.31	1.6e-16	-0.0002	0.0009	0.8184	TRUE
		rs12456049	A	G	0.0133454	0.00212045	39.61	2.2e-10	-0.0001	0.0008	0.8921	TRUE
		rs12497285	T	C	-0.0119768	0.00218651	30	4.4e-08	-0.001	0.0009	0.2355	TRUE
		rs12666221	T	G	0.015431	0.00274318	31.64	1.9e-08	0.0021	0.0012	0.06934	TRUE
		rs12806161	G	A	0.0121992	0.00214002	32.5	6e-09	-0.0009	0.0009	0.2768	TRUE
		rs12826749	C	G	0.0117437	0.00213934	30.13	3e-08	-0.0004	0.0009	0.6598	FALSE
		rs12855717	C	T	0.0119744	0.00211653	32.01	1.4e-08	0.0006	0.0009	0.475	TRUE
		rs12896749	G	C	0.0118127	0.00216417	29.79	4.8e-08	-0.001	0.0009	0.2463	TRUE
		rs13077466	A	G	0.0125531	0.00227576	30.43	3.4e-08	-0.0004	0.0009	0.6886	TRUE
		rs1371272	G	A	-0.0178252	0.00305537	34.04	4.7e-09	0.0009	0.0012	0.4814	TRUE
		rs1421085	T	C	-0.0192044	0.00214606	80.08	2.1e-19	0	0.0009	0.9769	TRUE
		rs144696853	A	G	0.0170615	0.00311181	30.06	3.1e-08	-0.0002	0.0017	0.9113	TRUE
		rs17050031	C	T	0.013742	0.00211432	42.24	5.1e-11	0.0005	0.0008	0.5456	TRUE
		rs183280845	G	A	0.0269065	0.00336742	63.84	1.3e-15	-0.0009	0.0018	0.6107	TRUE
		rs1876245	T	C	-0.0144748	0.00212608	46.35	7.7e-12	-0.0001	0.0008	0.8852	TRUE
		rs1992284	T	C	0.0132954	0.00239368	30.85	2.6e-08	0.0007	0.001	0.4595	TRUE
		rs2039501	A	G	-0.0119751	0.00210671	32.31	6.6e-09	-0.0022	0.0008	0.008767	TRUE
		rs2400095	C	T	0.0116897	0.00215074	29.54	3.9e-08	-0.0004	0.0009	0.6772	TRUE
		rs2413045	A	G	0.0222317	0.0026423	70.79	3e-17	0.0003	0.0011	0.8134	TRUE
		rs2596655	G	A	0.0123228	0.00213261	33.39	4.3e-09	0.0006	0.0008	0.4932	TRUE
		rs2614945	T	A	0.0144373	0.00216252	44.57	2.9e-11	-0.0004	0.0009	0.681	TRUE
		rs28533540	G	A	-0.0160449	0.00212029	57.26	2.4e-14	0.0001	0.0008	0.9018	TRUE
		rs303825	G	A	-0.0147251	0.00244529	36.26	1.9e-09	0.0002	0.001	0.8505	TRUE
		rs3124402	A	G	0.0228328	0.00237439	92.47	6.3e-22	0.0011	0.0009	0.2311	TRUE
		rs35287743	G	T	0.0298463	0.00330883	81.36	1.9e-19	0.0014	0.0014	0.2988	TRUE
		rs4002471	C	T	0.0207387	0.00212675	95.09	2.4e-22	-0.0006	0.0009	0.5028	TRUE
		rs4274714	C	T	-0.0127506	0.00215063	35.15	2.7e-09	-0.0015	0.0009	0.09634	TRUE
		rs45501495	C	T	-0.0167869	0.00248501	45.63	1.9e-11	-0.0009	0.001	0.3308	TRUE
		rs480293	A	C	0.0152669	0.00232482	43.12	4.3e-11	0.0002	0.0009	0.8139	TRUE
		rs4821724	C	T	-0.0120113	0.00214425	31.38	1.3e-08	-0.0002	0.0009	0.8307	TRUE
		rs4869859	T	C	-0.0162639	0.00211776	58.98	1.5e-14	-0.0007	0.0008	0.4239	TRUE
		rs552234	G	A	0.0137773	0.0021067	42.77	5.8e-11	0.0007	0.0008	0.4129	TRUE
		rs55871839	T	C	-0.0125597	0.00214889	34.16	3.5e-09	-0.0004	0.0009	0.6146	TRUE
		rs55985303	G	A	-0.0142253	0.00246407	33.33	7e-09	-0.0011	0.001	0.2657	TRUE
		rs6033437	C	A	-0.0148663	0.00243718	37.21	1.1e-09	-0.0007	0.001	0.4949	TRUE
		rs6089752	C	T	0.0122397	0.00211326	33.55	6.6e-09	0.0012	0.0009	0.1897	TRUE
		rs61882679	G	T	-0.0218474	0.00376481	33.68	7.4e-09	0.0019	0.0015	0.2185	TRUE
		rs62170022	C	T	-0.0136226	0.00222862	37.36	8.4e-10	0.002	0.001	0.04965	TRUE
		rs6465487	A	G	0.0135521	0.00215346	39.6	4.3e-10	0.0005	0.0009	0.5418	TRUE
		rs6807666	A	C	0.0149938	0.00220198	46.37	9.3e-12	0.0009	0.0009	0.3102	TRUE
		rs7148387	A	G	0.0159962	0.00214328	55.7	6.2e-14	0.0004	0.0009	0.6374	TRUE
		rs7687957	T	C	-0.0121515	0.00220425	30.39	3.6e-08	-0.0001	0.0009	0.9523	TRUE
		rs7924937	C	T	-0.0125498	0.00220843	32.29	1.4e-08	0.0009	0.0009	0.3066	TRUE
		rs809339	A	G	-0.0176104	0.00248744	50.12	1.5e-12	-0.0006	0.001	0.528	TRUE
		rs9597870	T	G	0.0143506	0.0024556	34.15	4.3e-09	-0.0001	0.001	0.8977	TRUE
		rs9841174	T	C	-0.016852	0.00217931	59.8	2.2e-14	-0.0003	0.0009	0.6937	TRUE
		rs9889161	G	T	0.0147829	0.0022029	45.03	1.7e-11	-0.0027	0.0009	0.003649	TRUE
oilyfish_overallfreq	THICK_rostralanteriorcingulate	rs10828266	A	G	-0.0231811	0.00234068	98.08	2.4e-23	-0.0001	0.0018	0.9446	TRUE
		rs11233632	C	T	0.0131768	0.00213372	38.14	7.9e-10	-0.0044	0.0017	0.009164	TRUE
		rs113230003	G	A	0.0151326	0.00241883	39.14	5.6e-10	0.0017	0.002	0.3965	TRUE
		rs114497213	G	T	-0.0294359	0.00468013	39.56	4.3e-10	0.0026	0.0042	0.5323	TRUE
		rs11650214	G	A	0.0178743	0.00305521	34.23	4.1e-09	-0.0005	0.0024	0.8245	TRUE
		rs11767283	A	G	-0.0190181	0.0025538	55.46	6.2e-14	-0.0042	0.0023	0.07356	TRUE
		rs11859365	A	C	-0.0240106	0.0024185	98.56	2.6e-23	0.0039	0.0019	0.04719	TRUE
		rs11993089	G	T	-0.0177512	0.0021478	68.31	1.6e-16	0.0017	0.0017	0.3291	TRUE
		rs12456049	A	G	0.0133454	0.00212045	39.61	2.2e-10	0.0006	0.0017	0.7085	TRUE
		rs12497285	T	C	-0.0119768	0.00218651	30	4.4e-08	0.0026	0.0017	0.1339	TRUE
		rs12666221	T	G	0.015431	0.00274318	31.64	1.9e-08	-0.0004	0.0023	0.8697	TRUE
		rs12806161	G	A	0.0121992	0.00214002	32.5	6e-09	0.0001	0.0017	0.9734	TRUE
		rs12826749	C	G	0.0117437	0.00213934	30.13	3e-08	0.0001	0.0017	0.9439	FALSE
		rs12855717	C	T	0.0119744	0.00211653	32.01	1.4e-08	0.001	0.0017	0.5566	TRUE
		rs12896749	G	C	0.0118127	0.00216417	29.79	4.8e-08	-0.0017	0.0017	0.327	TRUE
		rs13077466	A	G	0.0125531	0.00227576	30.43	3.4e-08	0.0009	0.0018	0.6163	TRUE
		rs1371272	G	A	-0.0178252	0.00305537	34.04	4.7e-09	0.0013	0.0024	0.5792	TRUE
		rs1421085	T	C	-0.0192044	0.00214606	80.08	2.1e-19	-0.0017	0.0017	0.3186	TRUE
		rs144696853	A	G	0.0170615	0.00311181	30.06	3.1e-08	-0.0037	0.0033	0.2575	TRUE
		rs17050031	C	T	0.013742	0.00211432	42.24	5.1e-11	-0.0005	0.0017	0.7811	TRUE
		rs183280845	G	A	0.0269065	0.00336742	63.84	1.3e-15	-0.0042	0.0036	0.2375	TRUE
		rs1876245	T	C	-0.0144748	0.00212608	46.35	7.7e-12	0.0029	0.0017	0.08192	TRUE
		rs1992284	T	C	0.0132954	0.00239368	30.85	2.6e-08	-0.0026	0.002	0.1825	TRUE
		rs2039501	A	G	-0.0119751	0.00210671	32.31	6.6e-09	0.0005	0.0017	0.7625	TRUE
		rs2400095	C	T	0.0116897	0.00215074	29.54	3.9e-08	-0.0037	0.0017	0.02831	TRUE
		rs2413045	A	G	0.0222317	0.0026423	70.79	3e-17	-0.0009	0.0022	0.6634	TRUE
		rs2596655	G	A	0.0123228	0.00213261	33.39	4.3e-09	0.0018	0.0017	0.2876	TRUE
		rs2614945	T	A	0.0144373	0.00216252	44.57	2.9e-11	0.0006	0.0017	0.7315	TRUE
		rs28533540	G	A	-0.0160449	0.00212029	57.26	2.4e-14	0.0024	0.0016	0.1479	TRUE
		rs303825	G	A	-0.0147251	0.00244529	36.26	1.9e-09	-0.0024	0.0019	0.2246	TRUE
		rs3124402	A	G	0.0228328	0.00237439	92.47	6.3e-22	-0.0025	0.0018	0.1841	TRUE
		rs35287743	G	T	0.0298463	0.00330883	81.36	1.9e-19	-0.0003	0.0027	0.9136	TRUE
		rs4002471	C	T	0.0207387	0.00212675	95.09	2.4e-22	-0.0022	0.0017	0.1922	TRUE
		rs4274714	C	T	-0.0127506	0.00215063	35.15	2.7e-09	0.001	0.0017	0.5599	TRUE
		rs45501495	C	T	-0.0167869	0.00248501	45.63	1.9e-11	-0.0002	0.0019	0.9239	TRUE
		rs480293	A	C	0.0152669	0.00232482	43.12	4.3e-11	-0.0029	0.0018	0.1113	TRUE
		rs4821724	C	T	-0.0120113	0.00214425	31.38	1.3e-08	0.0031	0.0017	0.06795	TRUE
		rs4869859	T	C	-0.0162639	0.00211776	58.98	1.5e-14	-0.0018	0.0017	0.2844	TRUE
		rs552234	G	A	0.0137773	0.0021067	42.77	5.8e-11	-0.0004	0.0016	0.8223	TRUE
		rs55871839	T	C	-0.0125597	0.00214889	34.16	3.5e-09	0.0014	0.0017	0.3973	TRUE
		rs55985303	G	A	-0.0142253	0.00246407	33.33	7e-09	-0.0036	0.0019	0.06432	TRUE
		rs6033437	C	A	-0.0148663	0.00243718	37.21	1.1e-09	-0.0013	0.0019	0.4953	TRUE
		rs6089752	C	T	0.0122397	0.00211326	33.55	6.6e-09	-0.0016	0.0018	0.3638	TRUE
		rs61882679	G	T	-0.0218474	0.00376481	33.68	7.4e-09	-0.0051	0.003	0.09348	TRUE
		rs62170022	C	T	-0.0136226	0.00222862	37.36	8.4e-10	0.0005	0.002	0.7832	TRUE
		rs6465487	A	G	0.0135521	0.00215346	39.6	4.3e-10	-0.0026	0.0017	0.1198	TRUE
		rs6807666	A	C	0.0149938	0.00220198	46.37	9.3e-12	0.0003	0.0017	0.8492	TRUE
		rs7148387	A	G	0.0159962	0.00214328	55.7	6.2e-14	-0.0003	0.0017	0.8825	TRUE
		rs7687957	T	C	-0.0121515	0.00220425	30.39	3.6e-08	0.0005	0.0018	0.7806	TRUE
		rs7924937	C	T	-0.0125498	0.00220843	32.29	1.4e-08	-0.0008	0.0017	0.6455	TRUE
		rs809339	A	G	-0.0176104	0.00248744	50.12	1.5e-12	0.0023	0.002	0.2466	TRUE
		rs9597870	T	G	0.0143506	0.0024556	34.15	4.3e-09	-0.0008	0.002	0.6968	TRUE
		rs9841174	T	C	-0.016852	0.00217931	59.8	2.2e-14	-0.0012	0.0017	0.4885	TRUE
		rs9889161	G	T	0.0147829	0.0022029	45.03	1.7e-11	0.002	0.0018	0.2743	TRUE
pork_overallfreq	SA_frontalpole	rs10215765	G	C	0.0214555	0.00380076	31.87	1.5e-08	-0.7148	0.5057	0.1575	TRUE
		rs10784053	T	C	-0.0121662	0.00212464	32.79	9.7e-09	0.2809	0.2805	0.3166	TRUE
		rs10972033	G	T	-0.0134003	0.00211473	40.15	2.9e-10	0.2417	0.2786	0.3855	TRUE
		rs13252421	C	G	0.0509887	0.00926395	30.29	4.2e-08	-1.7758	2.1655	0.4122	TRUE
		rs13262595	A	G	-0.0120226	0.00212335	32.06	1.4e-08	-0.0273	0.285	0.9236	TRUE
		rs1698114	A	G	-0.0129309	0.0022623	32.67	1.1e-08	0.7652	0.4465	0.08659	TRUE
		rs2591131	G	A	-0.0173849	0.00271212	41.09	1.7e-10	-0.1536	0.3558	0.6659	TRUE
		rs3964074	T	C	0.0133517	0.00212175	39.6	2.8e-10	-0.2995	0.278	0.2813	TRUE
		rs4146837	C	T	-0.0129274	0.00213719	36.59	1.8e-09	-0.3753	0.277	0.1755	TRUE
		rs429358	T	C	0.0172817	0.00291823	35.07	3.4e-09	-0.1989	0.3933	0.613	TRUE
		rs453520	C	T	0.0124198	0.00213783	33.75	6.1e-09	-0.2445	0.2763	0.3763	TRUE
		rs4672226	C	T	-0.0117318	0.00214675	29.87	4.7e-08	0.078	0.2775	0.7786	TRUE
		rs62062058	T	C	-0.0141561	0.00258481	29.99	4e-08	0.3168	0.3417	0.3539	TRUE
		rs9379829	C	T	0.0162075	0.00254964	40.41	1.7e-10	-0.4658	0.3218	0.1478	TRUE
pork_overallfreq	SA_parsorbitalis	rs10215765	G	C	0.0214555	0.00380076	31.87	1.5e-08	-3.1236	1.0355	0.002556	TRUE
		rs10784053	T	C	-0.0121662	0.00212464	32.79	9.7e-09	0.5588	0.5755	0.3316	TRUE
		rs10972033	G	T	-0.0134003	0.00211473	40.15	2.9e-10	0.9766	0.569	0.08612	TRUE
		rs13252421	C	G	0.0509887	0.00926395	30.29	4.2e-08	1.9109	4.4534	0.6679	TRUE
		rs13262595	A	G	-0.0120226	0.00212335	32.06	1.4e-08	0.6439	0.5806	0.2674	TRUE
		rs1698114	A	G	-0.0129309	0.0022623	32.67	1.1e-08	0.1384	0.9036	0.8783	TRUE
		rs2591131	G	A	-0.0173849	0.00271212	41.09	1.7e-10	0.3571	0.7274	0.6235	TRUE
		rs3964074	T	C	0.0133517	0.00212175	39.6	2.8e-10	-1.1727	0.5689	0.03926	TRUE
		rs4146837	C	T	-0.0129274	0.00213719	36.59	1.8e-09	0.4719	0.5649	0.4035	TRUE
		rs429358	T	C	0.0172817	0.00291823	35.07	3.4e-09	-0.733	0.7985	0.3586	TRUE
		rs453520	C	T	0.0124198	0.00213783	33.75	6.1e-09	-0.4346	0.5652	0.4419	TRUE
		rs4672226	C	T	-0.0117318	0.00214675	29.87	4.7e-08	0.1291	0.5669	0.8199	TRUE
		rs62062058	T	C	-0.0141561	0.00258481	29.99	4e-08	-1.0924	0.6965	0.1168	TRUE
		rs9379829	C	T	0.0162075	0.00254964	40.41	1.7e-10	0.1847	0.6574	0.7788	TRUE
pork_overallfreq	SA_superiorfrontal	rs10215765	G	C	0.0214555	0.00380076	31.87	1.5e-08	7.474	6.6321	0.2598	TRUE
		rs10784053	T	C	-0.0121662	0.00212464	32.79	9.7e-09	-0.6644	3.7038	0.8576	TRUE
		rs10972033	G	T	-0.0134003	0.00211473	40.15	2.9e-10	3.761	3.6553	0.3035	TRUE
[truncated: 770 more rows]

## Sheet: Global
Supplementary Table 3.2 Detailed information of instrumental variables used in MR analyses
Food type (exposure)	Cortical regions (outcome)	SNP	Effect allele	Other allele	Exposure (Food type)				Outcome (Cortical regions)
					Beta	SE	F	P-value	Beta	SE	P-value	mr_keep
beef_overallfreq	Full_SurfArea	rs10122339	G	T	-0.0163542	0.00210578	60.32	8.8e-15	-114.102	129.804	0.3794	TRUE
		rs10789340	A	G	0.0164376	0.0021759	57.07	3.4e-14	55.9354	135.812	0.6804	TRUE
		rs11165829	C	G	0.0121371	0.00218544	30.84	3.2e-08	38.0048	135.936	0.7798	TRUE
		rs11240430	G	C	0.0138942	0.00233513	35.4	2.9e-09	-79.7058	141.823	0.5741	TRUE
		rs1191468	G	A	0.0155846	0.00280281	30.92	2.5e-08	-222.511	184.463	0.2277	TRUE
		rs13146141	G	A	0.0122683	0.00221214	30.76	3.2e-08	144.314	136.411	0.2901	TRUE
		rs139552257	C	T	0.052097	0.00927923	31.52	2.4e-08	452.947	570.936	0.4276	TRUE
		rs1421085	T	C	0.0161168	0.00214269	56.58	4.7e-14	221.279	131.013	0.09122	TRUE
		rs1556147	A	T	-0.0128745	0.00223914	33.06	1.1e-08	139.643	139.599	0.3172	TRUE
		rs28758902	C	T	0.0118138	0.00212776	30.83	3e-08	85.2834	129.9	0.5115	TRUE
		rs429358	T	C	0.0172368	0.00290878	35.11	4.2e-09	215.41	183.637	0.2408	TRUE
		rs4676964	C	T	-0.015288	0.00211962	52.02	5.7e-13	-36.4484	133.931	0.7855	TRUE
		rs62396185	G	C	0.017431	0.00240399	52.58	4.9e-13	254.578	145.408	0.07998	TRUE
		rs9611611	C	T	0.0151915	0.0026584	32.66	9.9e-09	232.761	162.941	0.1531	TRUE
tea_cupsperday	Full_SurfArea	rs10741694	T	C	-0.0154204	0.00217077	50.46	7.7e-13	-144.786	132.821	0.2757	TRUE
		rs10752269	G	A	0.0123854	0.00209706	34.88	4.4e-09	81.6206	128.128	0.5241	TRUE
		rs10764990	G	A	0.0130913	0.00214579	37.22	9.9e-10	142.207	137.185	0.2999	TRUE
		rs11613633	C	A	-0.0166777	0.00291785	32.67	1.2e-08	43.4485	187.716	0.817	TRUE
		rs12295734	G	C	0.0127097	0.00229997	30.54	3e-08	-114.261	145.805	0.4332	TRUE
		rs12325187	C	G	0.0141191	0.00239297	34.81	3.5e-09	-119.94	153.511	0.4346	TRUE
		rs12591786	C	T	0.0190319	0.00291158	42.73	5.8e-11	321.972	185.584	0.08276	TRUE
		rs1453548	T	A	0.0131537	0.00222508	34.95	3.1e-09	18.3095	141.543	0.8971	TRUE
		rs169364	C	T	-0.0168492	0.00252786	44.43	2.8e-11	-232.825	156.269	0.1363	TRUE
		rs170768	C	T	0.0164374	0.00214728	58.6	2e-14	108.522	134.267	0.4189	TRUE
		rs17685	G	A	-0.0219932	0.0023358	88.66	1.3e-20	313.176	143.718	0.02932	TRUE
		rs187328	T	C	-0.0230039	0.00282613	66.26	3.7e-16	82.9006	206.147	0.6876	TRUE
		rs21126	G	A	-0.0127662	0.00211847	36.31	2e-09	-190.557	131.964	0.1487	TRUE
		rs2117137	A	G	-0.0146544	0.00213156	47.27	6.3e-12	-25.0652	132.25	0.8497	TRUE
		rs2231142	G	T	0.0261759	0.00329373	63.16	1.8e-15	-26.0578	205.345	0.899	TRUE
		rs2273447	A	T	-0.0165222	0.00260399	40.26	2.1e-10	-12.601	170.45	0.9411	TRUE
		rs2315025	C	T	-0.0150955	0.00222158	46.17	1.2e-11	-52.0112	138.068	0.7064	TRUE
		rs2465018	G	A	-0.0214869	0.00250519	73.56	1e-17	-130.35	157.931	0.4092	TRUE
		rs2472297	C	T	-0.0517549	0.00237716	474.01	1.4e-104	-358.645	154.885	0.02058	TRUE
		rs2958718	C	T	0.0143767	0.00248081	33.58	5.9e-09	-249.287	157.925	0.1144	TRUE
		rs34562238	C	T	0.0137765	0.00245782	31.42	2e-08	292.79	150.153	0.05118	TRUE
		rs34940743	A	G	-0.0129371	0.00219485	34.74	4.9e-09	-152.032	157.472	0.3343	TRUE
		rs4410790	T	C	-0.0384415	0.0021744	312.55	2.2e-69	-78.4614	133.558	0.5569	TRUE
		rs4418728	G	T	0.0119409	0.00210471	32.19	1.1e-08	193.213	132.229	0.144	TRUE
		rs4817505	T	C	-0.0138791	0.00215377	41.53	1.6e-10	-387.935	137.544	0.004796	TRUE
		rs4855406	C	A	-0.0120786	0.00218928	30.44	4.5e-08	51.4051	132.841	0.6988	TRUE
		rs56348300	C	G	-0.016745	0.0027012	38.43	3.9e-10	-296.885	167.123	0.07566	TRUE
		rs57462170	G	A	-0.020364	0.00337004	36.51	1e-09	354.155	208.645	0.08962	TRUE
		rs57631352	A	G	0.0137484	0.00229623	35.85	2e-09	108.219	142.847	0.4487	TRUE
		rs6033239	G	T	0.0128219	0.00218202	34.53	7.1e-09	-78.0944	135.516	0.5644	TRUE
		rs60345653	A	G	0.0133	0.00229362	33.62	5.7e-09	99.696	160.133	0.5336	TRUE
		rs62027754	T	G	-0.0124308	0.00229247	29.4	4.1e-08	-28.4603	144.522	0.8439	TRUE
		rs62092408	G	A	-0.015058	0.002697	31.17	2.1e-08	-51.0305	177.085	0.7732	TRUE
		rs6462899	T	A	-0.012388	0.00216649	32.7	9.7e-09	-25.1014	132.916	0.8502	TRUE
		rs725452	A	G	0.0148008	0.00257731	32.98	9.7e-09	-5.4527	156.41	0.9722	TRUE
		rs73075167	A	T	0.0189998	0.00316937	35.94	1.7e-09	171.576	204.566	0.4016	TRUE
		rs7999399	C	T	-0.01181	0.00211072	31.31	1.8e-08	-61.2903	129.495	0.636	TRUE
		rs962242	T	C	-0.0153061	0.00250831	37.24	1.5e-09	80.0292	158.383	0.6134	TRUE
		rs9624470	G	A	-0.0261855	0.00213225	150.82	2e-34	156.793	140.251	0.2636	TRUE
		rs9937521	C	T	0.0137321	0.0021263	41.71	2e-10	195.738	140.204	0.1627	TRUE
hotdrinktemp	Full_Thickness	rs10764990	G	A	0.0160406	0.00214701	55.82	5.7e-14	-0.0023	0.0009	0.01211	TRUE
		rs10829603	T	G	0.0144656	0.00211301	46.87	3.4e-12	-0.0023	0.0009	0.009235	TRUE
		rs10918383	T	C	0.0134206	0.00246929	29.54	4.9e-08	0.0014	0.001	0.1621	TRUE
		rs10949576	A	G	0.0119987	0.00210504	32.49	1.5e-08	-0.0002	0.0009	0.8058	TRUE
		rs11138794	G	A	-0.0122498	0.00224355	29.81	4.6e-08	0.0002	0.001	0.8677	TRUE
		rs112203261	C	A	-0.0151421	0.00219519	47.58	5.2e-12	0.0011	0.0013	0.4314	TRUE
		rs112706793	A	G	0.0253007	0.00430775	34.5	3.3e-09	-0.0055	0.0018	0.001771	TRUE
		rs1144428	G	A	0.0181658	0.00257892	49.62	2.3e-12	-0.0018	0.0011	0.0969	TRUE
		rs11710570	T	C	-0.0124685	0.00210589	35.06	2.5e-09	0.0014	0.0009	0.1228	TRUE
		rs12197552	C	G	0.0220922	0.0040073	30.39	4e-08	-0.0016	0.002	0.4296	TRUE
		rs12418887	A	G	0.0201663	0.00282336	51.02	8.2e-13	0	0.0012	0.9725	TRUE
		rs1260326	T	C	-0.0130294	0.00214173	37.01	1.4e-09	-0.0008	0.0009	0.3697	TRUE
		rs12607072	G	A	-0.0159479	0.00216414	54.3	2.5e-13	0.0003	0.0009	0.725	TRUE
		rs1326609	G	A	-0.0121333	0.0021717	31.21	2.1e-08	0.0009	0.0009	0.3195	TRUE
		rs133069	A	C	-0.0144745	0.00215853	44.97	1.3e-11	-0.0003	0.001	0.7186	TRUE
		rs1430204	T	C	-0.018708	0.00259834	51.84	5.7e-13	0	0.0011	0.9823	TRUE
		rs1447182	T	C	0.0164134	0.00256109	41.07	1.7e-10	-0.002	0.0011	0.06831	TRUE
		rs1462855	C	T	0.0140939	0.00212433	44.02	2.4e-11	0.0005	0.0009	0.5971	TRUE
		rs1513475	T	C	-0.0145065	0.0022002	43.47	3.8e-11	0.0001	0.0009	0.9546	TRUE
		rs1519659	G	A	-0.0145943	0.00244595	35.6	3.2e-09	-0.0017	0.001	0.09426	TRUE
		rs17409597	T	C	-0.012241	0.00210966	33.67	7.7e-09	-0.0003	0.0009	0.7405	TRUE
		rs17513240	A	T	-0.0163279	0.00277067	34.73	3.2e-09	0.0006	0.0011	0.6097	TRUE
		rs2472297	C	T	-0.0267528	0.00237863	126.5	3.7e-29	0.0011	0.0011	0.2905	TRUE
		rs2551023	A	C	-0.0148365	0.00210657	49.6	2.7e-12	-0.0003	0.0009	0.7626	TRUE
		rs2702576	A	G	0.0120864	0.00216415	31.19	2e-08	0.0005	0.0009	0.5476	TRUE
		rs2717046	C	T	-0.0163717	0.00216555	57.15	3.9e-14	0.0005	0.0009	0.6087	TRUE
		rs34292254	G	T	0.0115332	0.00211278	29.8	4.3e-08	-0.0025	0.0009	0.004417	TRUE
		rs34521235	T	C	-0.0146508	0.00263171	30.99	2.6e-08	-0.0007	0.0011	0.5344	TRUE
		rs4271161	T	C	0.01233	0.00225085	30.01	3.8e-08	0.0001	0.0009	0.8889	TRUE
		rs4410790	T	C	-0.0171468	0.00217606	62.09	2.4e-15	0.001	0.0009	0.2666	TRUE
		rs4451990	A	G	0.0131068	0.00234896	31.13	2.3e-08	-0.0007	0.001	0.4664	TRUE
		rs4529888	G	A	-0.012154	0.00213232	32.49	1e-08	-0.0008	0.0009	0.3784	TRUE
		rs4537651	G	A	0.0115452	0.0021012	30.19	3.2e-08	-0.0011	0.0009	0.1986	TRUE
		rs55880962	G	A	0.0174459	0.00265919	43.04	6e-11	0.0007	0.0011	0.5038	TRUE
		rs56143595	G	T	-0.015923	0.00230643	47.66	3.6e-12	0.0011	0.001	0.238	TRUE
		rs6581514	G	A	0.012063	0.00209726	33.08	4.9e-09	-0.0013	0.0009	0.1246	TRUE
		rs6695785	T	C	0.0160463	0.00211881	57.35	3.7e-14	-0.0001	0.0009	0.9271	TRUE
		rs6871231	C	T	-0.0127891	0.00216663	34.84	4e-09	0.0013	0.0009	0.1603	TRUE
		rs72636697	C	T	-0.0175683	0.00310227	32.07	1.3e-08	0.0013	0.0011	0.2517	TRUE
		rs7283775	G	T	0.0136384	0.00232857	34.3	6.4e-09	-0.0021	0.001	0.04425	TRUE
		rs7618494	A	G	0.0206368	0.00219107	88.71	5.7e-21	-0.0021	0.0009	0.02381	TRUE
		rs9267445	G	C	-0.0251045	0.00302627	68.82	1.2e-16	-0.0034	0.0014	0.01521	TRUE
		rs9453572	T	C	-0.0134726	0.00222405	36.7	9.6e-10	-0.0022	0.0009	0.02179	TRUE
		rs9568867	G	A	-0.0181193	0.00315292	33.03	7.9e-09	-0.002	0.0013	0.1201	TRUE
		rs968050	C	T	-0.0114273	0.00210113	29.58	4.7e-08	0.0002	0.0009	0.7882	TRUE
		rs992313	A	G	0.0148038	0.00211712	48.89	1.7e-12	-0.0003	0.0009	0.7723	TRUE
nonoilyfish_overallfreq	Full_Thickness	rs11680516	T	C	-0.0157356	0.00264097	35.5	2.8e-09	0.0005	0.0012	0.6488	TRUE
		rs12555454	T	C	-0.0121342	0.00219279	30.62	3.3e-08	-0.0003	0.0009	0.7199	TRUE
		rs1260326	T	C	0.012429	0.00215901	33.14	1.2e-08	-0.0008	0.0009	0.3697	TRUE
		rs1951283	G	A	0.0117454	0.00214805	29.9	4.6e-08	0.0005	0.0009	0.5502	TRUE
		rs35287743	G	T	0.0209583	0.00331875	39.88	3.3e-10	-0.0004	0.0014	0.7636	TRUE
		rs3799077	T	G	0.0139668	0.00229088	37.17	9.7e-10	-0.0004	0.0009	0.7107	TRUE
		rs56094641	A	G	-0.0158595	0.00215107	54.36	1.5e-13	0.0003	0.0009	0.7622	TRUE
		rs6957745	T	C	0.0162396	0.00263403	38.01	6.6e-10	-0.0009	0.0011	0.4555	TRUE
		rs7326846	C	T	-0.0127061	0.00231815	30.04	4.3e-08	0.0003	0.001	0.7588	TRUE
		rs838133	A	G	-0.0213091	0.00218724	94.92	2e-22	0.0013	0.0012	0.2513	TRUE
		rs9276710	T	C	0.014978	0.00263717	32.26	1.2e-08	-0.0011	0.0014	0.449	TRUE
