# Supplementary material for: Unveiling the influence of daily dietary patterns on brain cortical structure: insights from bidirectional Mendelian randomization
Source: Royal Society of Chemistry journal article supplement (doi:10.1039/d3fo02879h), 2023-01-01
Supplement: d3fo02879h4.xlsx [file d3fo02879h4.xlsx]

## Sheet: Food
Supplementary Table 4.1 Detailed information of instrumental variables used in MR analyses
Food type (exposure)	Cortical regions (outcome)	nSNP	Pleiotropy		Heterogenenity
			MR-egger P-value	MR-PRESSO	IVW test P-value	MR-egger P-value
alcohol_overallfreq	SA_rostralanteriorcingulate	71	0.812029	0.09	0.000751647	0.000584231
alcohol_overallfreq	THICK_frontalpole	71	0.37316	0.11	0.0873872	0.0859966
alcohol_overallfreq	THICK_postcentral	71	0.109428	0.0547	0.0446627	0.0617448
anyalcohol_glassespermonth	SA_caudalmiddlefrontal	72	0.57284	NA	0.00085077	0.000727228
anyalcohol_glassespermonth	THICK_frontalpole	72	0.974703	0.0989	0.0639391	0.0544073
beef_overallfreq	THICK_medialorbitofrontal	14	0.127564	0.6483	0.637327	0.784858
cereal_bowlsperweek	SA_medialorbitofrontal	42	0.249935	0.1811	0.124964	0.136603
cereal_bowlsperweek	THICK_superiorparietal	42	0.362548	0.9845	0.97945	0.98004
cheese_overallfreq	SA_posteriorcingulate	44	0.816441	0.1364	0.126337	0.107058
cheese_overallfreq	THICK_isthmuscingulate	44	0.70287	0.5342	0.526218	0.488997
cheese_overallfreq	THICK_lingual	44	0.446934	0.4673	0.472026	0.454213
cheese_overallfreq	THICK_middletemporal	44	0.196159	0.8972	0.899151	0.918345
cheese_overallfreq	THICK_rostralmiddlefrontal	44	0.50525	0.0815	0.0728165	0.0662085
coffee_cupsperday	SA_parahippocampal	39	0.691992	0.0609	0.0403118	0.0332468
coffee_cupsperday	THICK_entorhinal	39	0.282203	0.6376	0.639183	0.649976
cookedveg_TBSperday	THICK_lingual	23	0.575272	0.1799	0.173602	0.15076
doyouaddsalt	SA_cuneus	65	0.79859	0.4402	0.437371	0.404978
doyouaddsalt	SA_lingual	65	0.664681	0.2758	0.277408	0.254396
doyouaddsalt	THICK_supramarginal	65	0.851829	0.0557	0.0518671	0.0437588
freshfruit_piecesperday	THICK_frontalpole	75	0.942667	0.4998	0.493178	0.46039
freshfruit_piecesperday	THICK_inferiortemporal	75	0.724238	0.225	0.226199	0.205607
freshfruit_piecesperday	THICK_insula	74	0.763787	0.0988	0.0876458	0.0767016
freshfruit_piecesperday	THICK_lateralorbitofrontal	75	0.403545	0.5528	0.545147	0.53564
freshfruit_piecesperday	THICK_parstriangularis	75	0.740961	0.91	0.905732	0.892432
hotdrinktemp	SA_lateraloccipital	46	0.169426	0.2479	0.00160069	0.00257157
hotdrinktemp	SA_parahippocampal	46	0.374151	0.8315	0.831188	0.828315
hotdrinktemp	SA_parsopercularis	46	0.734466	0.4128	0.405335	0.369654
hotdrinktemp	SA_superiortemporal	46	0.885999	NA	0.0197388	0.0155373
hotdrinktemp	THICK_parahippocampal	46	0.687487	0.0884	0.0801438	0.068566
hotdrinktemp	THICK_rostralmiddlefrontal	46	0.890508	0.0916	0.0807429	0.066867
milk_typeused_bin5	SA_parsopercularis	5	0.244482	0.7018	0.657755	0.951935
milk_typeused_bin5	SA_parstriangularis	5	0.920407	0.3967	0.325179	0.200867
milk_typeused_bin5	SA_precentral	5	0.777462	0.4824	0.429659	0.294446
milk_typeused_bin5	SA_supramarginal	5	0.858913	0.9112	0.912362	0.814423
milk_typeused_bin5	THICK_entorhinal	5	0.764681	0.9911	0.988688	0.976016
milk_typeused_bin5	THICK_insula	5	0.819387	0.9873	0.984487	0.957609
milk_typeused_bin5	THICK_isthmuscingulate	5	0.505119	0.6236	0.662891	0.608746
milk_typeused_bin5	THICK_precuneus	5	0.909427	0.9983	0.997917	0.989764
milk_typeused_bin9	SA_bankssts	5	0.800247	0.7638	0.742376	0.596044
milk_typeused_bin9	SA_lingual	5	0.898054	0.9743	0.96719	0.909435
milk_typeused_bin9	SA_precentral	5	0.650949	0.5775	0.525222	0.399806
milk_typeused_bin9	SA_superiorfrontal	5	0.904938	0.9404	0.93072	0.839967
milk_typeused_bin9	SA_supramarginal	5	0.899745	0.9728	0.967734	0.910441
milk_typeused_bin9	THICK_entorhinal	5	0.973979	0.9422	0.936423	0.846171
milk_typeused_bin9	THICK_parsopercularis	5	0.824198	0.698	0.647468	0.488904
milk_typeused_bin9	THICK_parstriangularis	5	0.376176	0.7829	0.816806	0.923064
milk_typeused_bin9	THICK_postcentral	5	0.598282	0.955	0.960863	0.96472
nonoilyfish_overallfreq	SA_postcentral	11	0.906082	0.9374	0.932214	0.890833
nonoilyfish_overallfreq	THICK_middletemporal	11	0.211018	0.6516	0.638459	0.731081
nonoilyfish_overallfreq	THICK_paracentral	11	0.264804	0.435	0.422797	0.456907
oilyfish_overallfreq	SA_entorhinal	53	0.934565	0.1198	0.126043	0.107469
oilyfish_overallfreq	THICK_caudalanteriorcingulate	53	0.252194	0.1277	0.113776	0.12286
oilyfish_overallfreq	THICK_caudalmiddlefrontal	53	0.766243	0.4164	0.385552	0.351937
oilyfish_overallfreq	THICK_rostralanteriorcingulate	53	0.728946	0.2541	0.227216	0.202655
pork_overallfreq	SA_frontalpole	14	0.507665	0.7288	0.728236	0.693589
pork_overallfreq	SA_parsorbitalis	14	0.90377	0.29	0.278094	0.216998
pork_overallfreq	SA_superiorfrontal	14	0.813606	0.8315	0.839145	0.78436
pork_overallfreq	THICK_lateraloccipital	14	0.0347294	0.3214	0.302182	0.667015
pork_overallfreq	THICK_lingual	14	0.63888	0.5886	0.576318	0.513512
pork_overallfreq	THICK_medialorbitofrontal	14	0.978555	0.5113	0.514798	0.433199
rawveg_TBSperday	THICK_pericalcarine	30	0.331561	0.4592	0.443697	0.442246
tea_cupsperday	SA_insula	40	0.247305	0.3994	0.390026	0.407201
tea_cupsperday	SA_superiorparietal	40	0.141166	0.4958	0.506993	0.5658
tea_cupsperday	THICK_caudalanteriorcingulate	40	0.363584	0.1454	0.175445	0.173309
tea_cupsperday	THICK_caudalmiddlefrontal	40	0.395948	0.2798	0.277322	0.269026
tea_cupsperday	THICK_lateraloccipital	40	0.827522	NA	0.028223	0.022304
tea_cupsperday	THICK_parsorbitalis	40	0.557395	0.4225	0.417083	0.388711
water_glassesperday	SA_insula	59	0.310831	0.251	0.243434	0.246361
water_glassesperday	SA_lateraloccipital	59	0.155264	0.0932	0.103487	0.125671
water_glassesperday	THICK_insula	59	0.346071	0.1418	0.137423	0.137172
water_glassesperday	THICK_lateraloccipital	59	0.535788	0.7141	0.0519287	0.0468988
water_glassesperday	THICK_temporalpole	59	0.869552	0.9495	0.947885	0.936881
Carbohydrate	SA_middletemporal	10	0.823841	0.4685	0.874775	0.813725
Carbohydrate	SA_rostralmiddlefrontal	10	0.402579	0.4039	0.303167	0.289032
Carbohydrate	THICK_parstriangularis	10	0.896354	0.9331	0.901044	0.844733
Fat	SA_inferiortemporal	5	0.411348	0.822	0.811098	0.87768
Fat	SA_insula	5	0.339379	0.7065	0.652019	0.759265
Fat	SA_middletemporal	5	0.614009	0.963	0.970575	0.975171
Fat	SA_parsopercularis	5	0.395209	0.7035	0.728562	0.786914
Fat	SA_postcentral	5	0.483376	0.8598	0.845827	0.860349
Fat	THICK_caudalmiddlefrontal	5	0.703081	0.9871	0.992533	0.994235
Fat	THICK_entorhinal	5	0.832967	0.8409	0.760819	0.612587
Fat	THICK_frontalpole	5	0.764608	0.912	0.891416	0.798715
Fat	THICK_paracentral	5	0.376436	0.6864	0.667735	0.729429
Fat	THICK_superiorfrontal	5	0.531889	0.7211	0.706892	0.64569
Protein	SA_insula	7	0.688539	0.8785	0.859538	0.791729
Protein	SA_parsopercularis	7	0.946808	0.8896	0.877867	0.789986
Protein	SA_temporalpole	7	0.339508	0.6062	0.57493	0.601416
Protein	THICK_frontalpole	7	0.667167	0.7779	0.746133	0.657621
Protein	THICK_parsopercularis	7	0.625609	0.7861	0.772983	0.698432
Protein	THICK_posteriorcingulate	7	0.900372	0.8222	0.811515	0.705942
Sugar	SA_entorhinal	9	0.988375	0.8923	0.883017	0.813491
Sugar	THICK_parstriangularis	9	0.559852	0.634	0.607124	0.541612
Sugar	THICK_posteriorcingulate	9	0.276913	0.811	0.806308	0.871649

## Sheet: Global
Supplementary Table 4.2 Detailed information of instrumental variables used in MR analyses
Food type (exposure)	Cortical regions (outcome)	nSNP	Pleiotropy		Heterogenenity
			MR-egger P-value	MR-PRESSO	IVW test P-value	MR-egger P-value
beef_overallfreq	Full_SurfArea	14	0.418701	0.6703	0.656836	0.638052
tea_cupsperday	Full_SurfArea	40	0.596212	0.2073	0.215311	0.19351
hotdrinktemp	Full_Thickness	46	0.808964	NA	0.00285947	0.00216461
nonoilyfish_overallfreq	Full_Thickness	11	0.463998	0.9935	0.9923	0.994109
