# Supplementary material for: Unveiling the influence of daily dietary patterns on brain cortical structure: insights from bidirectional Mendelian randomization
Source: Royal Society of Chemistry journal article supplement (doi:10.1039/d3fo02879h), 2023-01-01
Supplement: d3fo02879h5.xlsx [file d3fo02879h5.xlsx]

## Sheet: Cortical regions
Supplementary Table 5.1 result of MR estimates for the association between the cortical regions and food type.
exposure	outcome	method	nSNP	beta	se	95%CI	pvalue
SA_bankssts	alcohol_overallfreq	IVW(MRE)	19	0.000109351	0.000167611	(0, 0)	0.51
SA_bankssts	alcohol_overallfreq	MR Egger	19	0.000138591	0.000576035	(0, 0)	0.81
SA_bankssts	alcohol_overallfreq	Weighted median	19	0.000288741	0.000135568	(0, 0)	0.033
SA_bankssts	alcohol_overallfreq	Simple mode	19	0.000301144	0.000221446	(0, 0)	0.19
SA_bankssts	alcohol_overallfreq	Weighted mode	19	0.000301144	0.000204261	(0, 0)	0.16
SA_caudalanteriorcingulate	alcohol_overallfreq	IVW(MRE)	15	0.000145137	0.000172601	(0, 0)	0.4
SA_caudalanteriorcingulate	alcohol_overallfreq	MR Egger	15	-0.000335537	0.00051932	(0, 0)	0.53
SA_caudalanteriorcingulate	alcohol_overallfreq	Weighted median	15	0.000122714	0.000178343	(0, 0)	0.49
SA_caudalanteriorcingulate	alcohol_overallfreq	Simple mode	15	0.000161061	0.000282682	(0, 0)	0.58
SA_caudalanteriorcingulate	alcohol_overallfreq	Weighted mode	15	0.000196321	0.000270332	(0, 0)	0.48
SA_caudalmiddlefrontal	alcohol_overallfreq	IVW(MRE)	28	-7.14762e-06	4.16205e-05	(0, 0)	0.86
SA_caudalmiddlefrontal	alcohol_overallfreq	MR Egger	28	4.5047e-05	0.000119574	(0, 0)	0.71
SA_caudalmiddlefrontal	alcohol_overallfreq	Weighted median	28	1.10089e-05	4.26671e-05	(0, 0)	0.8
SA_caudalmiddlefrontal	alcohol_overallfreq	Simple mode	28	2.32447e-05	7.47201e-05	(0, 0)	0.76
SA_caudalmiddlefrontal	alcohol_overallfreq	Weighted mode	28	2.32447e-05	6.15407e-05	(0, 0)	0.71
SA_cuneus	alcohol_overallfreq	IVW(MRE)	23	-4.23953e-05	0.000112162	(0, 0)	0.71
SA_cuneus	alcohol_overallfreq	MR Egger	23	0.000650746	0.000366054	(0, 0)	0.09
SA_cuneus	alcohol_overallfreq	Weighted median	23	0.000165656	9.59039e-05	(0, 0)	0.08
SA_cuneus	alcohol_overallfreq	Simple mode	23	0.000239599	0.000160697	(0, 0)	0.15
SA_cuneus	alcohol_overallfreq	Weighted mode	23	0.000219186	0.000125303	(0, 0)	0.09
SA_entorhinal	alcohol_overallfreq	IVW(MRE)	15	0.000152227	0.000235728	(0, 0)	0.52
SA_entorhinal	alcohol_overallfreq	MR Egger	15	0.00072648	0.000943425	(0, 0)	0.46
SA_entorhinal	alcohol_overallfreq	Weighted median	15	0.000104811	0.000269242	(0, 0)	0.7
SA_entorhinal	alcohol_overallfreq	Simple mode	15	8.63909e-05	0.00046218	(0, 0)	0.85
SA_entorhinal	alcohol_overallfreq	Weighted mode	15	0.000146096	0.000458858	(0, 0)	0.75
SA_frontalpole	alcohol_overallfreq	IVW(MRE)	11	0.00043625	0.000454032	(0, 0)	0.34
SA_frontalpole	alcohol_overallfreq	MR Egger	11	0.000700909	0.00101464	(0, 0)	0.51
SA_frontalpole	alcohol_overallfreq	Weighted median	11	0.00098907	0.00057316	(0, 0)	0.08
SA_frontalpole	alcohol_overallfreq	Simple mode	11	0.00116083	0.00092486	(0, 0)	0.24
SA_frontalpole	alcohol_overallfreq	Weighted mode	11	0.00114321	0.000813573	(0, 0)	0.19
SA_fusiform	alcohol_overallfreq	IVW(MRE)	19	8.07502e-05	6.34983e-05	(0, 0)	0.2
SA_fusiform	alcohol_overallfreq	MR Egger	19	4.28408e-05	0.00018123	(0, 0)	0.82
SA_fusiform	alcohol_overallfreq	Weighted median	19	2.1001e-05	5.94962e-05	(0, 0)	0.72
SA_fusiform	alcohol_overallfreq	Simple mode	19	4.54361e-06	0.00010594	(0, 0)	0.97
SA_fusiform	alcohol_overallfreq	Weighted mode	19	1.87706e-05	0.000101645	(0, 0)	0.86
SA_inferiorparietal	alcohol_overallfreq	IVW(MRE)	31	2.16233e-05	2.14753e-05	(0, 0)	0.31
SA_inferiorparietal	alcohol_overallfreq	MR Egger	31	-2.21511e-05	5.595e-05	(0, 0)	0.7
SA_inferiorparietal	alcohol_overallfreq	Weighted median	31	2.07015e-05	2.45386e-05	(0, 0)	0.4
SA_inferiorparietal	alcohol_overallfreq	Simple mode	31	4.23478e-05	5.25258e-05	(0, 0)	0.43
SA_inferiorparietal	alcohol_overallfreq	Weighted mode	31	4.23478e-05	5.04848e-05	(0, 0)	0.41
SA_inferiortemporal	alcohol_overallfreq	IVW(MRE)	27	5.74309e-06	4.28611e-05	(0, 0)	0.89
SA_inferiortemporal	alcohol_overallfreq	MR Egger	27	-9.46201e-05	0.000132155	(0, 0)	0.48
SA_inferiortemporal	alcohol_overallfreq	Weighted median	27	1.20385e-05	4.30963e-05	(0, 0)	0.78
SA_inferiortemporal	alcohol_overallfreq	Simple mode	27	5.67846e-06	8.444e-05	(0, 0)	0.95
SA_inferiortemporal	alcohol_overallfreq	Weighted mode	27	1.24061e-05	7.5847e-05	(0, 0)	0.87
SA_insula	alcohol_overallfreq	IVW(MRE)	29	9.76781e-05	5.80183e-05	(0, 0)	0.09
SA_insula	alcohol_overallfreq	MR Egger	29	2.09066e-05	0.000140151	(0, 0)	0.88
SA_insula	alcohol_overallfreq	Weighted median	29	6.03651e-05	7.22641e-05	(0, 0)	0.4
SA_insula	alcohol_overallfreq	Simple mode	29	5.15049e-05	0.000151402	(0, 0)	0.74
SA_insula	alcohol_overallfreq	Weighted mode	29	3.01044e-05	0.000128755	(0, 0)	0.82
SA_isthmuscingulate	alcohol_overallfreq	IVW(MRE)	20	-0.000107139	9.32543e-05	(0, 0)	0.25
SA_isthmuscingulate	alcohol_overallfreq	MR Egger	20	-0.000207597	0.000254623	(0, 0)	0.43
SA_isthmuscingulate	alcohol_overallfreq	Weighted median	20	-0.00018042	0.000124313	(0, 0)	0.15
SA_isthmuscingulate	alcohol_overallfreq	Simple mode	20	-0.000222372	0.000197278	(0, 0)	0.27
SA_isthmuscingulate	alcohol_overallfreq	Weighted mode	20	-0.000227567	0.000191017	(0, 0)	0.25
SA_lateraloccipital	alcohol_overallfreq	IVW(MRE)	20	1.53302e-05	4.69792e-05	(0, 0)	0.74
SA_lateraloccipital	alcohol_overallfreq	MR Egger	20	1.77015e-05	0.000205037	(0, 0)	0.93
SA_lateraloccipital	alcohol_overallfreq	Weighted median	20	1.61401e-05	3.9016e-05	(0, 0)	0.68
SA_lateraloccipital	alcohol_overallfreq	Simple mode	20	7.86025e-05	7.76305e-05	(0, 0)	0.32
SA_lateraloccipital	alcohol_overallfreq	Weighted mode	20	6.11938e-05	6.55303e-05	(0, 0)	0.36
SA_lateralorbitofrontal	alcohol_overallfreq	IVW(MRE)	24	-3.70654e-05	7.6477e-05	(0, 0)	0.63
SA_lateralorbitofrontal	alcohol_overallfreq	MR Egger	24	6.16519e-06	0.000303727	(0, 0)	0.98
SA_lateralorbitofrontal	alcohol_overallfreq	Weighted median	24	9.03491e-05	7.32326e-05	(0, 0)	0.22
SA_lateralorbitofrontal	alcohol_overallfreq	Simple mode	24	0.000160209	0.000137953	(0, 0)	0.26
SA_lateralorbitofrontal	alcohol_overallfreq	Weighted mode	24	0.000160209	0.00010859	(0, 0)	0.15
SA_lingual	alcohol_overallfreq	IVW(MRE)	39	3.42052e-05	2.67668e-05	(0, 0)	0.2
SA_lingual	alcohol_overallfreq	MR Egger	39	6.98588e-06	7.8722e-05	(0, 0)	0.93
SA_lingual	alcohol_overallfreq	Weighted median	39	7.04588e-05	3.14341e-05	(0, 0)	0.025
SA_lingual	alcohol_overallfreq	Simple mode	39	0.000141001	6.77155e-05	(0, 0)	0.044
SA_lingual	alcohol_overallfreq	Weighted mode	39	0.000111873	6.54438e-05	(0, 0)	0.1
SA_medialorbitofrontal	alcohol_overallfreq	IVW(MRE)	10	-0.000236756	0.000212688	(0, 0)	0.27
SA_medialorbitofrontal	alcohol_overallfreq	MR Egger	10	0.000145866	0.000590943	(0, 0)	0.81
SA_medialorbitofrontal	alcohol_overallfreq	Weighted median	10	-0.000105712	0.000137729	(0, 0)	0.44
SA_medialorbitofrontal	alcohol_overallfreq	Simple mode	10	-7.78172e-05	0.000181768	(0, 0)	0.68
SA_medialorbitofrontal	alcohol_overallfreq	Weighted mode	10	-7.78172e-05	0.000151999	(0, 0)	0.62
SA_middletemporal	alcohol_overallfreq	IVW(MRE)	22	1.31015e-05	4.19046e-05	(0, 0)	0.75
SA_middletemporal	alcohol_overallfreq	MR Egger	22	-7.39082e-05	0.000129293	(0, 0)	0.57
SA_middletemporal	alcohol_overallfreq	Weighted median	22	6.0178e-05	5.59576e-05	(0, 0)	0.28
SA_middletemporal	alcohol_overallfreq	Simple mode	22	0.000121259	0.000108243	(0, 0)	0.28
SA_middletemporal	alcohol_overallfreq	Weighted mode	22	0.000128533	0.000118212	(0, 0)	0.29
SA_paracentral	alcohol_overallfreq	IVW(MRE)	26	-1.37958e-05	7.93986e-05	(0, 0)	0.86
SA_paracentral	alcohol_overallfreq	MR Egger	26	1.82792e-05	0.000171479	(0, 0)	0.92
SA_paracentral	alcohol_overallfreq	Weighted median	26	-0.000114829	8.40302e-05	(0, 0)	0.17
SA_paracentral	alcohol_overallfreq	Simple mode	26	-0.000122641	0.000174695	(0, 0)	0.49
SA_paracentral	alcohol_overallfreq	Weighted mode	26	-0.000160295	0.000141005	(0, 0)	0.27
SA_parahippocampal	alcohol_overallfreq	IVW(MRE)	15	-2.38924e-05	0.000154869	(0, 0)	0.88
SA_parahippocampal	alcohol_overallfreq	MR Egger	15	-0.000457092	0.00031354	(0, 0)	0.17
SA_parahippocampal	alcohol_overallfreq	Weighted median	15	-6.39945e-05	0.000187794	(0, 0)	0.73
SA_parahippocampal	alcohol_overallfreq	Simple mode	15	-3.74491e-05	0.000304513	(0, 0)	0.9
SA_parahippocampal	alcohol_overallfreq	Weighted mode	15	-5.20812e-05	0.000276677	(0, 0)	0.85
SA_parsopercularis	alcohol_overallfreq	IVW(MRE)	20	-3.77938e-05	4.90245e-05	(0, 0)	0.44
SA_parsopercularis	alcohol_overallfreq	MR Egger	20	-8.53924e-05	0.000105153	(0, 0)	0.43
SA_parsopercularis	alcohol_overallfreq	Weighted median	20	-2.93127e-05	7.03882e-05	(0, 0)	0.68
SA_parsopercularis	alcohol_overallfreq	Simple mode	20	-2.30424e-05	0.000119406	(0, 0)	0.85
SA_parsopercularis	alcohol_overallfreq	Weighted mode	20	-2.30424e-05	0.00010796	(0, 0)	0.83
SA_parsorbitalis	alcohol_overallfreq	IVW(MRE)	12	0.000265486	0.00034064	(0, 0)	0.44
SA_parsorbitalis	alcohol_overallfreq	MR Egger	12	-0.002202	0.00110978	(0, 0)	0.08
SA_parsorbitalis	alcohol_overallfreq	Weighted median	12	-0.000184411	0.000335622	(0, 0)	0.58
SA_parsorbitalis	alcohol_overallfreq	Simple mode	12	-0.000500937	0.000605528	(0, 0)	0.43
SA_parsorbitalis	alcohol_overallfreq	Weighted mode	12	-0.000542914	0.000464039	(0, 0)	0.27
SA_parstriangularis	alcohol_overallfreq	IVW(MRE)	27	-6.4713e-05	6.03428e-05	(0, 0)	0.28
SA_parstriangularis	alcohol_overallfreq	MR Egger	27	-6.53495e-05	0.000144447	(0, 0)	0.65
SA_parstriangularis	alcohol_overallfreq	Weighted median	27	-3.73497e-05	7.44123e-05	(0, 0)	0.62
SA_parstriangularis	alcohol_overallfreq	Simple mode	27	9.76472e-05	0.000141652	(0, 0)	0.5
SA_parstriangularis	alcohol_overallfreq	Weighted mode	27	6.54715e-05	0.000160115	(0, 0)	0.69
SA_pericalcarine	alcohol_overallfreq	IVW(MRE)	39	-0.000122295	7.76203e-05	(0, 0)	0.12
SA_pericalcarine	alcohol_overallfreq	MR Egger	39	0.000183388	0.000235101	(0, 0)	0.44
SA_pericalcarine	alcohol_overallfreq	Weighted median	39	7.38396e-05	5.33005e-05	(0, 0)	0.17
SA_pericalcarine	alcohol_overallfreq	Simple mode	39	0.000145917	0.000103874	(0, 0)	0.17
SA_pericalcarine	alcohol_overallfreq	Weighted mode	39	0.000126725	7.20727e-05	(0, 0)	0.09
SA_postcentral	alcohol_overallfreq	IVW(MRE)	21	-3.87789e-06	4.47021e-05	(0, 0)	0.93
SA_postcentral	alcohol_overallfreq	MR Egger	21	9.98027e-05	0.000103996	(0, 0)	0.35
SA_postcentral	alcohol_overallfreq	Weighted median	21	2.41803e-05	4.74144e-05	(0, 0)	0.61
SA_postcentral	alcohol_overallfreq	Simple mode	21	-3.72102e-05	7.59261e-05	(0, 0)	0.63
SA_postcentral	alcohol_overallfreq	Weighted mode	21	3.8983e-06	6.41317e-05	(0, 0)	0.95
SA_posteriorcingulate	alcohol_overallfreq	IVW(MRE)	24	-9.09213e-05	8.82543e-05	(0, 0)	0.3
SA_posteriorcingulate	alcohol_overallfreq	MR Egger	24	-0.000128477	0.000276764	(0, 0)	0.65
SA_posteriorcingulate	alcohol_overallfreq	Weighted median	24	-0.000231288	0.000118869	(0, 0)	0.05
SA_posteriorcingulate	alcohol_overallfreq	Simple mode	24	-0.000284031	0.0002596	(0, 0)	0.29
SA_posteriorcingulate	alcohol_overallfreq	Weighted mode	24	-0.000289605	0.000245468	(0, 0)	0.25
SA_precentral	alcohol_overallfreq	IVW(MRE)	25	-4.68441e-05	2.78366e-05	(0, 0)	0.09
SA_precentral	alcohol_overallfreq	MR Egger	25	-1.95623e-06	4.48988e-05	(0, 0)	0.97
SA_precentral	alcohol_overallfreq	Weighted median	25	-1.83635e-06	3.02608e-05	(0, 0)	0.95
SA_precentral	alcohol_overallfreq	Simple mode	25	-9.44887e-05	6.52586e-05	(0, 0)	0.16
SA_precentral	alcohol_overallfreq	Weighted mode	25	1.77349e-07	3.04833e-05	(0, 0)	1
SA_precuneus	alcohol_overallfreq	IVW(MRE)	31	4.0841e-05	3.60806e-05	(0, 0)	0.26
SA_precuneus	alcohol_overallfreq	MR Egger	31	-0.00014032	7.89892e-05	(0, 0)	0.09
SA_precuneus	alcohol_overallfreq	Weighted median	31	-4.08844e-05	3.91697e-05	(0, 0)	0.3
SA_precuneus	alcohol_overallfreq	Simple mode	31	-2.82286e-05	8.30712e-05	(0, 0)	0.74
SA_precuneus	alcohol_overallfreq	Weighted mode	31	-5.53468e-05	5.98958e-05	(0, 0)	0.36
SA_rostralanteriorcingulate	alcohol_overallfreq	IVW(MRE)	16	0.000257651	0.000180749	(0, 0)	0.15
SA_rostralanteriorcingulate	alcohol_overallfreq	MR Egger	16	0.000256278	0.00037301	(0, 0)	0.5
SA_rostralanteriorcingulate	alcohol_overallfreq	Weighted median	16	0.000160921	0.000164004	(0, 0)	0.33
SA_rostralanteriorcingulate	alcohol_overallfreq	Simple mode	16	8.75484e-05	0.000249424	(0, 0)	0.73
SA_rostralanteriorcingulate	alcohol_overallfreq	Weighted mode	16	9.80529e-05	0.000198691	(0, 0)	0.63
SA_rostralmiddlefrontal	alcohol_overallfreq	IVW(MRE)	30	1.4143e-06	2.99809e-05	(0, 0)	0.96
SA_rostralmiddlefrontal	alcohol_overallfreq	MR Egger	30	1.02051e-05	7.53086e-05	(0, 0)	0.89
SA_rostralmiddlefrontal	alcohol_overallfreq	Weighted median	30	6.38085e-06	2.9553e-05	(0, 0)	0.83
SA_rostralmiddlefrontal	alcohol_overallfreq	Simple mode	30	-3.08128e-05	5.61114e-05	(0, 0)	0.59
SA_rostralmiddlefrontal	alcohol_overallfreq	Weighted mode	30	-8.71473e-06	4.32139e-05	(0, 0)	0.84
SA_superiorfrontal	alcohol_overallfreq	IVW(MRE)	23	2.90495e-05	2.79047e-05	(0, 0)	0.3
SA_superiorfrontal	alcohol_overallfreq	MR Egger	23	-0.00010011	6.46193e-05	(0, 0)	0.14
SA_superiorfrontal	alcohol_overallfreq	Weighted median	23	2.40887e-05	3.23211e-05	(0, 0)	0.46
SA_superiorfrontal	alcohol_overallfreq	Simple mode	23	2.33734e-05	6.47747e-05	(0, 0)	0.72
SA_superiorfrontal	alcohol_overallfreq	Weighted mode	23	2.63627e-05	5.88818e-05	(0, 0)	0.66
SA_superiorparietal	alcohol_overallfreq	IVW(MRE)	28	4.87637e-05	2.92624e-05	(0, 0)	0.1
SA_superiorparietal	alcohol_overallfreq	MR Egger	28	-5.06661e-06	6.07801e-05	(0, 0)	0.93
SA_superiorparietal	alcohol_overallfreq	Weighted median	28	1.59332e-05	2.67582e-05	(0, 0)	0.55
SA_superiorparietal	alcohol_overallfreq	Simple mode	28	2.35261e-05	5.04004e-05	(0, 0)	0.64
SA_superiorparietal	alcohol_overallfreq	Weighted mode	28	2.11305e-05	3.37302e-05	(0, 0)	0.54
SA_superiortemporal	alcohol_overallfreq	IVW(MRE)	22	9.19598e-06	4.41475e-05	(0, 0)	0.83
SA_superiortemporal	alcohol_overallfreq	MR Egger	22	0.000116977	0.000131809	(0, 0)	0.39
SA_superiortemporal	alcohol_overallfreq	Weighted median	22	3.11161e-05	5.62047e-05	(0, 0)	0.58
SA_superiortemporal	alcohol_overallfreq	Simple mode	22	1.73676e-05	0.000111838	(0, 0)	0.88
SA_superiortemporal	alcohol_overallfreq	Weighted mode	22	2.273e-05	0.000105428	(0, 0)	0.83
SA_supramarginal	alcohol_overallfreq	IVW(MRE)	24	3.96049e-06	3.11326e-05	(0, 0)	0.9
SA_supramarginal	alcohol_overallfreq	MR Egger	24	1.33204e-05	7.44011e-05	(0, 0)	0.86
SA_supramarginal	alcohol_overallfreq	Weighted median	24	-1.66738e-05	3.63212e-05	(0, 0)	0.65
SA_supramarginal	alcohol_overallfreq	Simple mode	24	-1.00548e-05	6.38854e-05	(0, 0)	0.88
SA_supramarginal	alcohol_overallfreq	Weighted mode	24	-1.99577e-05	4.67173e-05	(0, 0)	0.67
SA_temporalpole	alcohol_overallfreq	IVW(MRE)	15	0.000374097	0.000529179	(0, 0)	0.48
SA_temporalpole	alcohol_overallfreq	MR Egger	15	0.000107166	0.000960206	(0, 0)	0.91
SA_temporalpole	alcohol_overallfreq	Weighted median	15	-0.000562216	0.000343111	(0, 0)	0.1
SA_temporalpole	alcohol_overallfreq	Simple mode	15	-0.000681084	0.00046374	(0, 0)	0.16
SA_temporalpole	alcohol_overallfreq	Weighted mode	15	-0.000656719	0.000380847	(0, 0)	0.11
SA_transversetemporal	alcohol_overallfreq	IVW(MRE)	35	-0.000144023	0.00016698	(0, 0)	0.39
SA_transversetemporal	alcohol_overallfreq	MR Egger	35	0.000467228	0.000388772	(0, 0)	0.24
SA_transversetemporal	alcohol_overallfreq	Weighted median	35	-0.000209917	0.000226827	(0, 0)	0.35
SA_transversetemporal	alcohol_overallfreq	Simple mode	35	-0.000458978	0.00041583	(0, 0)	0.28
SA_transversetemporal	alcohol_overallfreq	Weighted mode	35	-0.000383504	0.000390629	(0, 0)	0.33
THICK_bankssts	alcohol_overallfreq	IVW(MRE)	12	-0.0257388	0.210901	(-0.44, 0.39)	0.9
THICK_bankssts	alcohol_overallfreq	MR Egger	12	-0.290882	0.541728	(-1.35, 0.77)	0.6
THICK_bankssts	alcohol_overallfreq	Weighted median	12	0.167841	0.192448	(-0.21, 0.55)	0.38
THICK_bankssts	alcohol_overallfreq	Simple mode	12	0.515913	0.31024	(-0.09, 1.12)	0.12
THICK_bankssts	alcohol_overallfreq	Weighted mode	12	0.499799	0.320102	(-0.13, 1.13)	0.15
THICK_caudalanteriorcingulate	alcohol_overallfreq	IVW(MRE)	10	-0.182139	0.0478617	(-0.28, -0.09)	0.00014
THICK_caudalanteriorcingulate	alcohol_overallfreq	MR Egger	10	-0.28499	0.118334	(-0.52, -0.05)	0.043
THICK_caudalanteriorcingulate	alcohol_overallfreq	Weighted median	10	-0.189232	0.0829207	(-0.35, -0.03)	0.022
THICK_caudalanteriorcingulate	alcohol_overallfreq	Simple mode	10	-0.263008	0.133124	(-0.52, 0)	0.08
THICK_caudalanteriorcingulate	alcohol_overallfreq	Weighted mode	10	-0.259237	0.119955	(-0.49, -0.02)	0.06
THICK_caudalmiddlefrontal	alcohol_overallfreq	IVW(MRE)	12	-0.0697289	0.146801	(-0.36, 0.22)	0.63
THICK_caudalmiddlefrontal	alcohol_overallfreq	MR Egger	12	0.192954	0.355407	(-0.5, 0.89)	0.6
THICK_caudalmiddlefrontal	alcohol_overallfreq	Weighted median	12	-0.255623	0.184449	(-0.62, 0.11)	0.17
THICK_caudalmiddlefrontal	alcohol_overallfreq	Simple mode	12	-0.290771	0.341518	(-0.96, 0.38)	0.41
THICK_caudalmiddlefrontal	alcohol_overallfreq	Weighted mode	12	-0.296238	0.30906	(-0.9, 0.31)	0.36
THICK_cuneus	alcohol_overallfreq	IVW(MRE)	8	0.402852	0.46355	(-0.51, 1.31)	0.38
THICK_cuneus	alcohol_overallfreq	MR Egger	8	0.371174	1.11971	(-1.82, 2.57)	0.75
THICK_cuneus	alcohol_overallfreq	Weighted median	8	-0.110421	0.196705	(-0.5, 0.28)	0.57
THICK_cuneus	alcohol_overallfreq	Simple mode	8	-0.204784	0.250353	(-0.7, 0.29)	0.44
THICK_cuneus	alcohol_overallfreq	Weighted mode	8	-0.138621	0.258305	(-0.64, 0.37)	0.61
THICK_entorhinal	alcohol_overallfreq	IVW(MRE)	9	0.046234	0.0762829	(-0.1, 0.2)	0.54
THICK_entorhinal	alcohol_overallfreq	MR Egger	9	-0.413219	0.236697	(-0.88, 0.05)	0.12
THICK_entorhinal	alcohol_overallfreq	Weighted median	9	0.0588886	0.0716401	(-0.08, 0.2)	0.41
THICK_entorhinal	alcohol_overallfreq	Simple mode	9	0.214056	0.148437	(-0.08, 0.5)	0.19
THICK_entorhinal	alcohol_overallfreq	Weighted mode	9	0.219811	0.16518	(-0.1, 0.54)	0.22
THICK_frontalpole	alcohol_overallfreq	IVW(MRE)	12	0.00500538	0.0525036	(-0.1, 0.11)	0.92
THICK_frontalpole	alcohol_overallfreq	MR Egger	12	-0.0598022	0.118544	(-0.29, 0.17)	0.62
THICK_frontalpole	alcohol_overallfreq	Weighted median	12	0.0217309	0.0748305	(-0.12, 0.17)	0.77
THICK_frontalpole	alcohol_overallfreq	Simple mode	12	0.156676	0.125596	(-0.09, 0.4)	0.24
THICK_frontalpole	alcohol_overallfreq	Weighted mode	12	0.137905	0.121377	(-0.1, 0.38)	0.28
THICK_fusiform	alcohol_overallfreq	IVW(MRE)	8	0.172694	0.208774	(-0.24, 0.58)	0.41
THICK_fusiform	alcohol_overallfreq	MR Egger	8	0.431927	0.484855	(-0.52, 1.38)	0.41
THICK_fusiform	alcohol_overallfreq	Weighted median	8	0.268927	0.215925	(-0.15, 0.69)	0.21
THICK_fusiform	alcohol_overallfreq	Simple mode	8	0.428027	0.319358	(-0.2, 1.05)	0.22
THICK_fusiform	alcohol_overallfreq	Weighted mode	8	0.384014	0.300761	(-0.21, 0.97)	0.24
THICK_inferiorparietal	alcohol_overallfreq	IVW(MRE)	13	0.239667	0.151017	(-0.06, 0.54)	0.11
THICK_inferiorparietal	alcohol_overallfreq	MR Egger	13	0.323513	0.380943	(-0.42, 1.07)	0.41
THICK_inferiorparietal	alcohol_overallfreq	Weighted median	13	0.300881	0.220039	(-0.13, 0.73)	0.17
THICK_inferiorparietal	alcohol_overallfreq	Simple mode	13	0.355651	0.336912	(-0.3, 1.02)	0.31
THICK_inferiorparietal	alcohol_overallfreq	Weighted mode	13	0.36255	0.318235	(-0.26, 0.99)	0.28
THICK_inferiortemporal	alcohol_overallfreq	IVW(MRE)	18	-0.201438	0.179673	(-0.55, 0.15)	0.26
THICK_inferiortemporal	alcohol_overallfreq	MR Egger	18	0.0947918	0.338962	(-0.57, 0.76)	0.78
THICK_inferiortemporal	alcohol_overallfreq	Weighted median	18	-0.0313849	0.129653	(-0.29, 0.22)	0.81
THICK_inferiortemporal	alcohol_overallfreq	Simple mode	18	-0.114586	0.22046	(-0.55, 0.32)	0.61
THICK_inferiortemporal	alcohol_overallfreq	Weighted mode	18	-0.0360554	0.184359	(-0.4, 0.33)	0.85
THICK_insula	alcohol_overallfreq	IVW(MRE)	14	-0.0326075	0.151727	(-0.33, 0.26)	0.83
THICK_insula	alcohol_overallfreq	MR Egger	14	-0.42996	0.393049	(-1.2, 0.34)	0.3
THICK_insula	alcohol_overallfreq	Weighted median	14	-0.266624	0.14728	(-0.56, 0.02)	0.07
THICK_insula	alcohol_overallfreq	Simple mode	14	-0.298364	0.235463	(-0.76, 0.16)	0.23
THICK_insula	alcohol_overallfreq	Weighted mode	14	-0.28302	0.194144	(-0.66, 0.1)	0.17
THICK_isthmuscingulate	alcohol_overallfreq	IVW(MRE)	28	-0.0689613	0.04796	(-0.16, 0.03)	0.15
THICK_isthmuscingulate	alcohol_overallfreq	MR Egger	28	-0.125505	0.1168	(-0.35, 0.1)	0.29
THICK_isthmuscingulate	alcohol_overallfreq	Weighted median	28	-0.0536393	0.0689851	(-0.19, 0.08)	0.44
THICK_isthmuscingulate	alcohol_overallfreq	Simple mode	28	0.0146477	0.124838	(-0.23, 0.26)	0.91
THICK_isthmuscingulate	alcohol_overallfreq	Weighted mode	28	0.0109196	0.131562	(-0.25, 0.27)	0.93
THICK_lateraloccipital	alcohol_overallfreq	IVW(MRE)	13	-0.0839479	0.1393	(-0.36, 0.19)	0.55
THICK_lateraloccipital	alcohol_overallfreq	MR Egger	13	0.0696624	0.30979	(-0.54, 0.68)	0.83
THICK_lateraloccipital	alcohol_overallfreq	Weighted median	13	-0.087375	0.184363	(-0.45, 0.27)	0.64
THICK_lateraloccipital	alcohol_overallfreq	Simple mode	13	-0.132735	0.318508	(-0.76, 0.49)	0.68
THICK_lateraloccipital	alcohol_overallfreq	Weighted mode	13	-0.11209	0.303273	(-0.71, 0.48)	0.72
THICK_lateralorbitofrontal	alcohol_overallfreq	IVW(MRE)	7	-0.0489967	0.17683	(-0.4, 0.3)	0.78
THICK_lateralorbitofrontal	alcohol_overallfreq	MR Egger	7	0.500834	0.21741	(0.07, 0.93)	0.07
THICK_lateralorbitofrontal	alcohol_overallfreq	Weighted median	7	-0.11646	0.206804	(-0.52, 0.29)	0.57
THICK_lateralorbitofrontal	alcohol_overallfreq	Simple mode	7	-0.514587	0.342613	(-1.19, 0.16)	0.18
THICK_lateralorbitofrontal	alcohol_overallfreq	Weighted mode	7	-0.514587	0.327071	(-1.16, 0.13)	0.17
THICK_lingual	alcohol_overallfreq	IVW(MRE)	14	0.153072	0.18396	(-0.21, 0.51)	0.41
THICK_lingual	alcohol_overallfreq	MR Egger	14	0.3768	0.516627	(-0.64, 1.39)	0.48
THICK_lingual	alcohol_overallfreq	Weighted median	14	0.162922	0.18827	(-0.21, 0.53)	0.39
THICK_lingual	alcohol_overallfreq	Simple mode	14	0.176719	0.298053	(-0.41, 0.76)	0.56
THICK_lingual	alcohol_overallfreq	Weighted mode	14	0.168121	0.27765	(-0.38, 0.71)	0.56
THICK_medialorbitofrontal	alcohol_overallfreq	IVW(MRE)	14	-0.092007	0.0953575	(-0.28, 0.09)	0.33
THICK_medialorbitofrontal	alcohol_overallfreq	MR Egger	14	0.182297	0.264458	(-0.34, 0.7)	0.5
THICK_medialorbitofrontal	alcohol_overallfreq	Weighted median	14	-0.0267648	0.114194	(-0.25, 0.2)	0.81
THICK_medialorbitofrontal	alcohol_overallfreq	Simple mode	14	-0.0247561	0.243407	(-0.5, 0.45)	0.92
THICK_medialorbitofrontal	alcohol_overallfreq	Weighted mode	14	0.0374102	0.231867	(-0.42, 0.49)	0.87
THICK_middletemporal	alcohol_overallfreq	IVW(MRE)	10	-0.292853	0.203374	(-0.69, 0.11)	0.15
THICK_middletemporal	alcohol_overallfreq	MR Egger	10	-0.528518	0.472691	(-1.45, 0.4)	0.3
THICK_middletemporal	alcohol_overallfreq	Weighted median	10	-0.160377	0.195527	(-0.54, 0.22)	0.41
THICK_middletemporal	alcohol_overallfreq	Simple mode	10	0.0903893	0.325469	(-0.55, 0.73)	0.79
THICK_middletemporal	alcohol_overallfreq	Weighted mode	10	0.0903893	0.35264	(-0.6, 0.78)	0.8
THICK_paracentral	alcohol_overallfreq	IVW(MRE)	14	-0.0197979	0.123595	(-0.26, 0.22)	0.87
THICK_paracentral	alcohol_overallfreq	MR Egger	14	0.179577	0.265868	(-0.34, 0.7)	0.51
THICK_paracentral	alcohol_overallfreq	Weighted median	14	0.116292	0.152863	(-0.18, 0.42)	0.45
THICK_paracentral	alcohol_overallfreq	Simple mode	14	-0.464172	0.327692	(-1.11, 0.18)	0.18
THICK_paracentral	alcohol_overallfreq	Weighted mode	14	0.257326	0.245202	(-0.22, 0.74)	0.31
THICK_parahippocampal	alcohol_overallfreq	IVW(MRE)	26	0.00990617	0.047929	(-0.08, 0.1)	0.84
THICK_parahippocampal	alcohol_overallfreq	MR Egger	26	0.023129	0.111266	(-0.19, 0.24)	0.84
THICK_parahippocampal	alcohol_overallfreq	Weighted median	26	0.0104805	0.0513493	(-0.09, 0.11)	0.84
THICK_parahippocampal	alcohol_overallfreq	Simple mode	26	0.0445045	0.0954882	(-0.14, 0.23)	0.65
THICK_parahippocampal	alcohol_overallfreq	Weighted mode	26	0.0250224	0.0827764	(-0.14, 0.19)	0.76
THICK_parsopercularis	alcohol_overallfreq	IVW(MRE)	16	-0.0350744	0.0951791	(-0.22, 0.15)	0.71
THICK_parsopercularis	alcohol_overallfreq	MR Egger	16	-0.134627	0.286651	(-0.7, 0.43)	0.65
THICK_parsopercularis	alcohol_overallfreq	Weighted median	16	-0.123306	0.148152	(-0.41, 0.17)	0.41
THICK_parsopercularis	alcohol_overallfreq	Simple mode	16	-0.144829	0.238245	(-0.61, 0.32)	0.55
THICK_parsopercularis	alcohol_overallfreq	Weighted mode	16	-0.127143	0.24638	(-0.61, 0.36)	0.61
THICK_parsorbitalis	alcohol_overallfreq	IVW(MRE)	12	0.127814	0.0561608	(0.02, 0.24)	0.023
THICK_parsorbitalis	alcohol_overallfreq	MR Egger	12	0.203693	0.15653	(-0.1, 0.51)	0.22
THICK_parsorbitalis	alcohol_overallfreq	Weighted median	12	0.142335	0.105993	(-0.07, 0.35)	0.18
THICK_parsorbitalis	alcohol_overallfreq	Simple mode	12	0.187205	0.150423	(-0.11, 0.48)	0.24
THICK_parsorbitalis	alcohol_overallfreq	Weighted mode	12	0.158601	0.138033	(-0.11, 0.43)	0.27
THICK_parstriangularis	alcohol_overallfreq	IVW(MRE)	18	-0.251928	0.124523	(-0.5, -0.01)	0.043
THICK_parstriangularis	alcohol_overallfreq	MR Egger	18	-0.145553	0.283136	(-0.7, 0.41)	0.61
THICK_parstriangularis	alcohol_overallfreq	Weighted median	18	-0.0429733	0.150565	(-0.34, 0.25)	0.78
THICK_parstriangularis	alcohol_overallfreq	Simple mode	18	0.0152353	0.300287	(-0.57, 0.6)	0.96
THICK_parstriangularis	alcohol_overallfreq	Weighted mode	18	0.0152353	0.233332	(-0.44, 0.47)	0.95
THICK_pericalcarine	alcohol_overallfreq	IVW(MRE)	18	-0.043823	0.119823	(-0.28, 0.19)	0.71
THICK_pericalcarine	alcohol_overallfreq	MR Egger	18	0.181777	0.3502	(-0.5, 0.87)	0.61
THICK_pericalcarine	alcohol_overallfreq	Weighted median	18	-0.0377925	0.143269	(-0.32, 0.24)	0.79
THICK_pericalcarine	alcohol_overallfreq	Simple mode	18	-0.0495419	0.25487	(-0.55, 0.45)	0.85
THICK_pericalcarine	alcohol_overallfreq	Weighted mode	18	-0.0687253	0.241857	(-0.54, 0.41)	0.78
THICK_postcentral	alcohol_overallfreq	IVW(MRE)	24	-0.0240664	0.125779	(-0.27, 0.22)	0.85
THICK_postcentral	alcohol_overallfreq	MR Egger	24	0.242456	0.238652	(-0.23, 0.71)	0.32
THICK_postcentral	alcohol_overallfreq	Weighted median	24	0.0310168	0.132549	(-0.23, 0.29)	0.81
THICK_postcentral	alcohol_overallfreq	Simple mode	24	0.0353336	0.240793	(-0.44, 0.51)	0.88
THICK_postcentral	alcohol_overallfreq	Weighted mode	24	0.0449691	0.142635	(-0.23, 0.32)	0.76
THICK_posteriorcingulate	alcohol_overallfreq	IVW(MRE)	13	0.0342782	0.150301	(-0.26, 0.33)	0.82
THICK_posteriorcingulate	alcohol_overallfreq	MR Egger	13	-0.854259	0.479294	(-1.79, 0.09)	0.1
THICK_posteriorcingulate	alcohol_overallfreq	Weighted median	13	0.0396837	0.160386	(-0.27, 0.35)	0.8
THICK_posteriorcingulate	alcohol_overallfreq	Simple mode	13	0.157499	0.288015	(-0.41, 0.72)	0.59
THICK_posteriorcingulate	alcohol_overallfreq	Weighted mode	13	0.157499	0.262216	(-0.36, 0.67)	0.56
THICK_precentral	alcohol_overallfreq	IVW(MRE)	14	-0.182414	0.136775	(-0.45, 0.09)	0.18
THICK_precentral	alcohol_overallfreq	MR Egger	14	-0.22354	0.387978	(-0.98, 0.54)	0.58
THICK_precentral	alcohol_overallfreq	Weighted median	14	-0.224962	0.180467	(-0.58, 0.13)	0.21
THICK_precentral	alcohol_overallfreq	Simple mode	14	-0.46432	0.383698	(-1.22, 0.29)	0.25
THICK_precentral	alcohol_overallfreq	Weighted mode	14	-0.452476	0.388999	(-1.21, 0.31)	0.27
THICK_precuneus	alcohol_overallfreq	IVW(MRE)	20	-0.070661	0.167623	(-0.4, 0.26)	0.67
THICK_precuneus	alcohol_overallfreq	MR Egger	20	-0.196149	0.409001	(-1, 0.61)	0.64
THICK_precuneus	alcohol_overallfreq	Weighted median	20	-0.0870627	0.198374	(-0.48, 0.3)	0.66
THICK_precuneus	alcohol_overallfreq	Simple mode	20	-0.212672	0.380478	(-0.96, 0.53)	0.58
THICK_precuneus	alcohol_overallfreq	Weighted mode	20	-0.100612	0.368176	(-0.82, 0.62)	0.79
THICK_rostralanteriorcingulate	alcohol_overallfreq	IVW(MRE)	23	-0.060407	0.0720914	(-0.2, 0.08)	0.4
THICK_rostralanteriorcingulate	alcohol_overallfreq	MR Egger	23	0.107564	0.175449	(-0.24, 0.45)	0.55
THICK_rostralanteriorcingulate	alcohol_overallfreq	Weighted median	23	-0.10822	0.0824696	(-0.27, 0.05)	0.19
THICK_rostralanteriorcingulate	alcohol_overallfreq	Simple mode	23	-0.274253	0.177378	(-0.62, 0.07)	0.14
THICK_rostralanteriorcingulate	alcohol_overallfreq	Weighted mode	23	-0.243449	0.172812	(-0.58, 0.1)	0.17
THICK_rostralmiddlefrontal	alcohol_overallfreq	IVW(MRE)	14	-0.322844	0.156104	(-0.63, -0.02)	0.039
THICK_rostralmiddlefrontal	alcohol_overallfreq	MR Egger	14	0.265	0.419663	(-0.56, 1.09)	0.54
THICK_rostralmiddlefrontal	alcohol_overallfreq	Weighted median	14	-0.296952	0.201146	(-0.69, 0.1)	0.14
THICK_rostralmiddlefrontal	alcohol_overallfreq	Simple mode	14	-0.120587	0.352523	(-0.81, 0.57)	0.74
THICK_rostralmiddlefrontal	alcohol_overallfreq	Weighted mode	14	-0.240962	0.31422	(-0.86, 0.37)	0.46
THICK_superiorfrontal	alcohol_overallfreq	IVW(MRE)	22	-0.296884	0.269964	(-0.83, 0.23)	0.27
THICK_superiorfrontal	alcohol_overallfreq	MR Egger	22	1.11608	0.54843	(0.04, 2.19)	0.06
THICK_superiorfrontal	alcohol_overallfreq	Weighted median	22	-0.177289	0.170223	(-0.51, 0.16)	0.3
THICK_superiorfrontal	alcohol_overallfreq	Simple mode	22	-0.385956	0.358613	(-1.09, 0.32)	0.29
THICK_superiorfrontal	alcohol_overallfreq	Weighted mode	22	-0.353087	0.346804	(-1.03, 0.33)	0.32
THICK_superiorparietal	alcohol_overallfreq	IVW(MRE)	14	0.173585	0.172207	(-0.16, 0.51)	0.31
THICK_superiorparietal	alcohol_overallfreq	MR Egger	14	0.209162	0.493614	(-0.76, 1.18)	0.68
THICK_superiorparietal	alcohol_overallfreq	Weighted median	14	0.375996	0.19868	(-0.01, 0.77)	0.06
THICK_superiorparietal	alcohol_overallfreq	Simple mode	14	0.523047	0.316914	(-0.1, 1.14)	0.12
THICK_superiorparietal	alcohol_overallfreq	Weighted mode	14	0.490827	0.293336	(-0.08, 1.07)	0.12
THICK_superiortemporal	alcohol_overallfreq	IVW(MRE)	11	-0.113588	0.168825	(-0.44, 0.22)	0.5
THICK_superiortemporal	alcohol_overallfreq	MR Egger	11	0.0313642	0.361065	(-0.68, 0.74)	0.93
THICK_superiortemporal	alcohol_overallfreq	Weighted median	11	-0.109811	0.197002	(-0.5, 0.28)	0.58
THICK_superiortemporal	alcohol_overallfreq	Simple mode	11	-0.342004	0.349406	(-1.03, 0.34)	0.35
THICK_superiortemporal	alcohol_overallfreq	Weighted mode	11	-0.241506	0.274648	(-0.78, 0.3)	0.4
THICK_supramarginal	alcohol_overallfreq	IVW(MRE)	20	0.194714	0.159608	(-0.12, 0.51)	0.22
THICK_supramarginal	alcohol_overallfreq	MR Egger	20	-0.45871	0.383292	(-1.21, 0.29)	0.25
THICK_supramarginal	alcohol_overallfreq	Weighted median	20	0.059405	0.197862	(-0.33, 0.45)	0.76
THICK_supramarginal	alcohol_overallfreq	Simple mode	20	-0.0911961	0.422129	(-0.92, 0.74)	0.83
THICK_supramarginal	alcohol_overallfreq	Weighted mode	20	-0.123872	0.386442	(-0.88, 0.63)	0.75
THICK_temporalpole	alcohol_overallfreq	IVW(MRE)	6	-0.115446	0.0604039	(-0.23, 0)	0.06
THICK_temporalpole	alcohol_overallfreq	MR Egger	6	0.0401242	0.106489	(-0.17, 0.25)	0.73
THICK_temporalpole	alcohol_overallfreq	Weighted median	6	-0.0932446	0.0866746	(-0.26, 0.08)	0.28
THICK_temporalpole	alcohol_overallfreq	Simple mode	6	-0.0940918	0.116356	(-0.32, 0.13)	0.46
THICK_temporalpole	alcohol_overallfreq	Weighted mode	6	-0.0940918	0.0984391	(-0.29, 0.1)	0.38
THICK_transversetemporal	alcohol_overallfreq	IVW(MRE)	12	-0.0458825	0.0699515	(-0.18, 0.09)	0.51
THICK_transversetemporal	alcohol_overallfreq	MR Egger	12	-0.0944133	0.177417	(-0.44, 0.25)	0.61
THICK_transversetemporal	alcohol_overallfreq	Weighted median	12	-0.0443818	0.102753	(-0.25, 0.16)	0.67
THICK_transversetemporal	alcohol_overallfreq	Simple mode	12	-0.091082	0.155964	(-0.4, 0.21)	0.57
THICK_transversetemporal	alcohol_overallfreq	Weighted mode	12	-0.0553692	0.137274	(-0.32, 0.21)	0.69
SA_bankssts	anyalcohol_glassespermonth	IVW(MRE)	19	6.02628e-05	0.000177236	(0, 0)	0.73
SA_bankssts	anyalcohol_glassespermonth	MR Egger	19	-9.29908e-05	0.000607942	(0, 0)	0.88
SA_bankssts	anyalcohol_glassespermonth	Weighted median	19	0.000166636	0.000146856	(0, 0)	0.26
SA_bankssts	anyalcohol_glassespermonth	Simple mode	19	0.000124031	0.000232492	(0, 0)	0.6
SA_bankssts	anyalcohol_glassespermonth	Weighted mode	19	0.000142672	0.000213584	(0, 0)	0.51
SA_caudalanteriorcingulate	anyalcohol_glassespermonth	IVW(MRE)	15	0.000329343	0.000147969	(0, 0)	0.026
SA_caudalanteriorcingulate	anyalcohol_glassespermonth	MR Egger	15	-5.69857e-05	0.000447181	(0, 0)	0.9
SA_caudalanteriorcingulate	anyalcohol_glassespermonth	Weighted median	15	0.000218105	0.000164646	(0, 0)	0.19
SA_caudalanteriorcingulate	anyalcohol_glassespermonth	Simple mode	15	0.000160408	0.000276524	(0, 0)	0.57
SA_caudalanteriorcingulate	anyalcohol_glassespermonth	Weighted mode	15	0.000221492	0.00024721	(0, 0)	0.39
SA_caudalmiddlefrontal	anyalcohol_glassespermonth	IVW(MRE)	28	-1.0036e-05	3.93999e-05	(0, 0)	0.8
SA_caudalmiddlefrontal	anyalcohol_glassespermonth	MR Egger	28	4.3108e-05	0.000113116	(0, 0)	0.71
SA_caudalmiddlefrontal	anyalcohol_glassespermonth	Weighted median	28	2.56188e-06	4.36849e-05	(0, 0)	0.95
SA_caudalmiddlefrontal	anyalcohol_glassespermonth	Simple mode	28	5.07414e-06	7.42005e-05	(0, 0)	0.95
SA_caudalmiddlefrontal	anyalcohol_glassespermonth	Weighted mode	28	1.15147e-05	6.54252e-05	(0, 0)	0.86
SA_cuneus	anyalcohol_glassespermonth	IVW(MRE)	23	-5.6974e-05	0.00010966	(0, 0)	0.6
SA_cuneus	anyalcohol_glassespermonth	MR Egger	23	0.000697508	0.00034982	(0, 0)	0.06
SA_cuneus	anyalcohol_glassespermonth	Weighted median	23	1.70997e-05	9.56837e-05	(0, 0)	0.86
SA_cuneus	anyalcohol_glassespermonth	Simple mode	23	0.000122364	0.000157411	(0, 0)	0.45
SA_cuneus	anyalcohol_glassespermonth	Weighted mode	23	9.45201e-05	0.000142813	(0, 0)	0.51
SA_entorhinal	anyalcohol_glassespermonth	IVW(MRE)	15	0.000284726	0.000150845	(0, 0)	0.06
SA_entorhinal	anyalcohol_glassespermonth	MR Egger	15	0.000258909	0.000711522	(0, 0)	0.72
SA_entorhinal	anyalcohol_glassespermonth	Weighted median	15	0.00034414	0.000262188	(0, 0)	0.19
SA_entorhinal	anyalcohol_glassespermonth	Simple mode	15	0.000313757	0.000453628	(0, 0)	0.5
SA_entorhinal	anyalcohol_glassespermonth	Weighted mode	15	0.000313757	0.000433782	(0, 0)	0.48
SA_frontalpole	anyalcohol_glassespermonth	IVW(MRE)	11	2.70938e-05	0.000401402	(0, 0)	0.95
SA_frontalpole	anyalcohol_glassespermonth	MR Egger	11	9.38146e-05	0.000900976	(0, 0)	0.92
SA_frontalpole	anyalcohol_glassespermonth	Weighted median	11	0.00031046	0.000551965	(0, 0)	0.57
SA_frontalpole	anyalcohol_glassespermonth	Simple mode	11	0.000608443	0.00106369	(0, 0)	0.58
SA_frontalpole	anyalcohol_glassespermonth	Weighted mode	11	0.000764661	0.000936022	(0, 0)	0.43
SA_fusiform	anyalcohol_glassespermonth	IVW(MRE)	19	8.44442e-05	7.45679e-05	(0, 0)	0.26
SA_fusiform	anyalcohol_glassespermonth	MR Egger	19	0.000266319	0.000207832	(0, 0)	0.22
SA_fusiform	anyalcohol_glassespermonth	Weighted median	19	6.5112e-05	5.57883e-05	(0, 0)	0.24
SA_fusiform	anyalcohol_glassespermonth	Simple mode	19	6.06394e-05	9.63322e-05	(0, 0)	0.54
SA_fusiform	anyalcohol_glassespermonth	Weighted mode	19	8.06552e-05	8.29882e-05	(0, 0)	0.34
SA_inferiorparietal	anyalcohol_glassespermonth	IVW(MRE)	31	1.52859e-05	2.10339e-05	(0, 0)	0.47
SA_inferiorparietal	anyalcohol_glassespermonth	MR Egger	31	-5.26836e-05	5.37632e-05	(0, 0)	0.34
SA_inferiorparietal	anyalcohol_glassespermonth	Weighted median	31	2.35589e-05	2.58455e-05	(0, 0)	0.36
SA_inferiorparietal	anyalcohol_glassespermonth	Simple mode	31	7.62556e-05	5.97974e-05	(0, 0)	0.21
SA_inferiorparietal	anyalcohol_glassespermonth	Weighted mode	31	7.43928e-05	4.92568e-05	(0, 0)	0.14
SA_inferiortemporal	anyalcohol_glassespermonth	IVW(MRE)	27	2.90808e-05	4.06226e-05	(0, 0)	0.47
SA_inferiortemporal	anyalcohol_glassespermonth	MR Egger	27	-2.83379e-05	0.000126275	(0, 0)	0.82
SA_inferiortemporal	anyalcohol_glassespermonth	Weighted median	27	-5.38106e-06	4.31119e-05	(0, 0)	0.9
SA_inferiortemporal	anyalcohol_glassespermonth	Simple mode	27	-3.51109e-05	8.14305e-05	(0, 0)	0.67
SA_inferiortemporal	anyalcohol_glassespermonth	Weighted mode	27	-2.88044e-05	7.23181e-05	(0, 0)	0.69
SA_insula	anyalcohol_glassespermonth	IVW(MRE)	29	7.52104e-05	5.68072e-05	(0, 0)	0.19
SA_insula	anyalcohol_glassespermonth	MR Egger	29	-1.58e-05	0.000136793	(0, 0)	0.91
SA_insula	anyalcohol_glassespermonth	Weighted median	29	5.41106e-05	6.96959e-05	(0, 0)	0.44
SA_insula	anyalcohol_glassespermonth	Simple mode	29	0.000139451	0.000141506	(0, 0)	0.33
SA_insula	anyalcohol_glassespermonth	Weighted mode	29	0.000128389	0.000122589	(0, 0)	0.3
SA_isthmuscingulate	anyalcohol_glassespermonth	IVW(MRE)	20	-7.01016e-05	7.86423e-05	(0, 0)	0.37
SA_isthmuscingulate	anyalcohol_glassespermonth	MR Egger	20	-4.9215e-05	0.000226194	(0, 0)	0.83
SA_isthmuscingulate	anyalcohol_glassespermonth	Weighted median	20	-5.23178e-05	0.000119286	(0, 0)	0.66
SA_isthmuscingulate	anyalcohol_glassespermonth	Simple mode	20	0.000149645	0.000219968	(0, 0)	0.5
SA_isthmuscingulate	anyalcohol_glassespermonth	Weighted mode	20	0.000129254	0.000232738	(0, 0)	0.59
SA_lateraloccipital	anyalcohol_glassespermonth	IVW(MRE)	20	8.13739e-06	5.79141e-05	(0, 0)	0.89
SA_lateraloccipital	anyalcohol_glassespermonth	MR Egger	20	-6.41754e-05	0.000252156	(0, 0)	0.8
SA_lateraloccipital	anyalcohol_glassespermonth	Weighted median	20	-2.70171e-05	3.92327e-05	(0, 0)	0.49
SA_lateraloccipital	anyalcohol_glassespermonth	Simple mode	20	-1.496e-06	6.58605e-05	(0, 0)	0.98
SA_lateraloccipital	anyalcohol_glassespermonth	Weighted mode	20	-1.46191e-05	5.49963e-05	(0, 0)	0.79
SA_lateralorbitofrontal	anyalcohol_glassespermonth	IVW(MRE)	24	-4.06989e-05	6.82508e-05	(0, 0)	0.55
SA_lateralorbitofrontal	anyalcohol_glassespermonth	MR Egger	24	0.000102085	0.000269364	(0, 0)	0.71
SA_lateralorbitofrontal	anyalcohol_glassespermonth	Weighted median	24	9.6471e-06	7.15383e-05	(0, 0)	0.89
SA_lateralorbitofrontal	anyalcohol_glassespermonth	Simple mode	24	8.10348e-06	0.000127887	(0, 0)	0.95
SA_lateralorbitofrontal	anyalcohol_glassespermonth	Weighted mode	24	1.60832e-05	0.000110046	(0, 0)	0.89
SA_lingual	anyalcohol_glassespermonth	IVW(MRE)	39	2.53252e-05	2.7696e-05	(0, 0)	0.36
SA_lingual	anyalcohol_glassespermonth	MR Egger	39	-4.31589e-05	8.07213e-05	(0, 0)	0.6
SA_lingual	anyalcohol_glassespermonth	Weighted median	39	-3.48067e-07	3.38773e-05	(0, 0)	0.99
SA_lingual	anyalcohol_glassespermonth	Simple mode	39	-5.13056e-05	7.23312e-05	(0, 0)	0.48
SA_lingual	anyalcohol_glassespermonth	Weighted mode	39	-4.62301e-05	6.7354e-05	(0, 0)	0.5
SA_medialorbitofrontal	anyalcohol_glassespermonth	IVW(MRE)	10	-0.000274791	0.000220428	(0, 0)	0.21
SA_medialorbitofrontal	anyalcohol_glassespermonth	MR Egger	10	0.000230788	0.000600588	(0, 0)	0.71
SA_medialorbitofrontal	anyalcohol_glassespermonth	Weighted median	10	-3.86256e-05	0.00013911	(0, 0)	0.78
SA_medialorbitofrontal	anyalcohol_glassespermonth	Simple mode	10	-4.88483e-05	0.0001661	(0, 0)	0.78
SA_medialorbitofrontal	anyalcohol_glassespermonth	Weighted mode	10	-6.13627e-05	0.000154866	(0, 0)	0.7
SA_middletemporal	anyalcohol_glassespermonth	IVW(MRE)	22	1.18151e-05	5.15374e-05	(0, 0)	0.82
SA_middletemporal	anyalcohol_glassespermonth	MR Egger	22	-9.96538e-05	0.000158844	(0, 0)	0.54
SA_middletemporal	anyalcohol_glassespermonth	Weighted median	22	6.33666e-06	6.08327e-05	(0, 0)	0.92
SA_middletemporal	anyalcohol_glassespermonth	Simple mode	22	2.51051e-05	0.000109864	(0, 0)	0.82
SA_middletemporal	anyalcohol_glassespermonth	Weighted mode	22	1.50363e-05	0.000106517	(0, 0)	0.89
SA_paracentral	anyalcohol_glassespermonth	IVW(MRE)	26	-4.74773e-05	7.16805e-05	(0, 0)	0.51
SA_paracentral	anyalcohol_glassespermonth	MR Egger	26	-4.2187e-05	0.00015495	(0, 0)	0.79
SA_paracentral	anyalcohol_glassespermonth	Weighted median	26	-5.3701e-05	8.45888e-05	(0, 0)	0.53
SA_paracentral	anyalcohol_glassespermonth	Simple mode	26	-4.23559e-05	0.000162769	(0, 0)	0.8
SA_paracentral	anyalcohol_glassespermonth	Weighted mode	26	-5.47838e-05	0.000134461	(0, 0)	0.69
SA_parahippocampal	anyalcohol_glassespermonth	IVW(MRE)	15	5.01093e-05	0.000171761	(0, 0)	0.77
SA_parahippocampal	anyalcohol_glassespermonth	MR Egger	15	-0.000288881	0.000363826	(0, 0)	0.44
SA_parahippocampal	anyalcohol_glassespermonth	Weighted median	15	0.000190505	0.000196419	(0, 0)	0.33
SA_parahippocampal	anyalcohol_glassespermonth	Simple mode	15	0.000111184	0.000301248	(0, 0)	0.72
SA_parahippocampal	anyalcohol_glassespermonth	Weighted mode	15	0.0001762	0.000260166	(0, 0)	0.51
SA_parsopercularis	anyalcohol_glassespermonth	IVW(MRE)	20	-5.03532e-05	4.77309e-05	(0, 0)	0.29
SA_parsopercularis	anyalcohol_glassespermonth	MR Egger	20	-1.07599e-05	0.000105634	(0, 0)	0.92
SA_parsopercularis	anyalcohol_glassespermonth	Weighted median	20	-7.43645e-05	7.15007e-05	(0, 0)	0.3
SA_parsopercularis	anyalcohol_glassespermonth	Simple mode	20	-0.000127873	0.00013473	(0, 0)	0.35
SA_parsopercularis	anyalcohol_glassespermonth	Weighted mode	20	-0.000118481	0.000120851	(0, 0)	0.34
SA_parsorbitalis	anyalcohol_glassespermonth	IVW(MRE)	12	8.48776e-05	0.000287437	(0, 0)	0.77
SA_parsorbitalis	anyalcohol_glassespermonth	MR Egger	12	-0.00199428	0.000937184	(0, 0)	0.06
SA_parsorbitalis	anyalcohol_glassespermonth	Weighted median	12	0.0002888	0.000306212	(0, 0)	0.35
SA_parsorbitalis	anyalcohol_glassespermonth	Simple mode	12	0.000404124	0.000623919	(0, 0)	0.53
SA_parsorbitalis	anyalcohol_glassespermonth	Weighted mode	12	0.000271253	0.000538013	(0, 0)	0.62
SA_parstriangularis	anyalcohol_glassespermonth	IVW(MRE)	27	-9.6788e-05	5.69177e-05	(0, 0)	0.09
SA_parstriangularis	anyalcohol_glassespermonth	MR Egger	27	-5.79658e-05	0.00013598	(0, 0)	0.67
SA_parstriangularis	anyalcohol_glassespermonth	Weighted median	27	-9.6733e-05	6.91501e-05	(0, 0)	0.16
SA_parstriangularis	anyalcohol_glassespermonth	Simple mode	27	-0.000150824	0.000142627	(0, 0)	0.3
SA_parstriangularis	anyalcohol_glassespermonth	Weighted mode	27	-0.000134727	0.000137976	(0, 0)	0.34
SA_pericalcarine	anyalcohol_glassespermonth	IVW(MRE)	39	-0.000122155	7.78025e-05	(0, 0)	0.12
SA_pericalcarine	anyalcohol_glassespermonth	MR Egger	39	-9.88976e-07	0.000240682	(0, 0)	1
SA_pericalcarine	anyalcohol_glassespermonth	Weighted median	39	1.60752e-05	5.06058e-05	(0, 0)	0.75
SA_pericalcarine	anyalcohol_glassespermonth	Simple mode	39	0.000104596	9.81583e-05	(0, 0)	0.29
SA_pericalcarine	anyalcohol_glassespermonth	Weighted mode	39	8.47577e-05	7.56661e-05	(0, 0)	0.27
SA_postcentral	anyalcohol_glassespermonth	IVW(MRE)	21	2.93413e-05	4.28526e-05	(0, 0)	0.49
SA_postcentral	anyalcohol_glassespermonth	MR Egger	21	0.000154464	9.7805e-05	(0, 0)	0.13
SA_postcentral	anyalcohol_glassespermonth	Weighted median	21	5.33852e-05	4.83702e-05	(0, 0)	0.27
SA_postcentral	anyalcohol_glassespermonth	Simple mode	21	-3.17269e-05	8.62589e-05	(0, 0)	0.72
SA_postcentral	anyalcohol_glassespermonth	Weighted mode	21	4.95637e-05	6.09878e-05	(0, 0)	0.43
SA_posteriorcingulate	anyalcohol_glassespermonth	IVW(MRE)	24	-9.34217e-05	9.7071e-05	(0, 0)	0.34
SA_posteriorcingulate	anyalcohol_glassespermonth	MR Egger	24	-0.000181297	0.000303907	(0, 0)	0.56
SA_posteriorcingulate	anyalcohol_glassespermonth	Weighted median	24	-0.000119269	0.00012392	(0, 0)	0.34
SA_posteriorcingulate	anyalcohol_glassespermonth	Simple mode	24	-0.00018019	0.000258343	(0, 0)	0.49
SA_posteriorcingulate	anyalcohol_glassespermonth	Weighted mode	24	-0.000166223	0.000263903	(0, 0)	0.53
SA_precentral	anyalcohol_glassespermonth	IVW(MRE)	25	-1.76552e-05	2.55273e-05	(0, 0)	0.49
SA_precentral	anyalcohol_glassespermonth	MR Egger	25	1.48306e-05	4.1709e-05	(0, 0)	0.73
SA_precentral	anyalcohol_glassespermonth	Weighted median	25	2.56037e-05	2.98272e-05	(0, 0)	0.39
SA_precentral	anyalcohol_glassespermonth	Simple mode	25	-1.46686e-05	6.16837e-05	(0, 0)	0.81
SA_precentral	anyalcohol_glassespermonth	Weighted mode	25	1.66871e-05	2.99361e-05	(0, 0)	0.58
SA_precuneus	anyalcohol_glassespermonth	IVW(MRE)	31	3.95975e-05	3.54481e-05	(0, 0)	0.26
SA_precuneus	anyalcohol_glassespermonth	MR Egger	31	-0.000107212	8.02963e-05	(0, 0)	0.19
SA_precuneus	anyalcohol_glassespermonth	Weighted median	31	5.43812e-06	4.06083e-05	(0, 0)	0.89
SA_precuneus	anyalcohol_glassespermonth	Simple mode	31	-4.08425e-05	8.28776e-05	(0, 0)	0.63
SA_precuneus	anyalcohol_glassespermonth	Weighted mode	31	-4.65972e-05	5.89692e-05	(0, 0)	0.44
SA_rostralanteriorcingulate	anyalcohol_glassespermonth	IVW(MRE)	16	0.000292533	0.00018107	(0, 0)	0.11
SA_rostralanteriorcingulate	anyalcohol_glassespermonth	MR Egger	16	0.000288636	0.00037367	(0, 0)	0.45
SA_rostralanteriorcingulate	anyalcohol_glassespermonth	Weighted median	16	0.000270549	0.00016354	(0, 0)	0.1
SA_rostralanteriorcingulate	anyalcohol_glassespermonth	Simple mode	16	0.000316568	0.000218784	(0, 0)	0.17
SA_rostralanteriorcingulate	anyalcohol_glassespermonth	Weighted mode	16	0.00029789	0.000207233	(0, 0)	0.17
SA_rostralmiddlefrontal	anyalcohol_glassespermonth	IVW(MRE)	30	-9.31975e-06	3.22389e-05	(0, 0)	0.77
SA_rostralmiddlefrontal	anyalcohol_glassespermonth	MR Egger	30	8.04516e-06	8.09148e-05	(0, 0)	0.92
SA_rostralmiddlefrontal	anyalcohol_glassespermonth	Weighted median	30	-4.79747e-06	3.14887e-05	(0, 0)	0.88
SA_rostralmiddlefrontal	anyalcohol_glassespermonth	Simple mode	30	2.9894e-05	6.15486e-05	(0, 0)	0.63
SA_rostralmiddlefrontal	anyalcohol_glassespermonth	Weighted mode	30	2.45118e-05	4.86661e-05	(0, 0)	0.62
SA_superiorfrontal	anyalcohol_glassespermonth	IVW(MRE)	23	1.03524e-05	3.27135e-05	(0, 0)	0.75
SA_superiorfrontal	anyalcohol_glassespermonth	MR Egger	23	-0.000142372	7.56165e-05	(0, 0)	0.07
SA_superiorfrontal	anyalcohol_glassespermonth	Weighted median	23	1.21236e-05	3.58368e-05	(0, 0)	0.74
SA_superiorfrontal	anyalcohol_glassespermonth	Simple mode	23	-8.67698e-05	8.21132e-05	(0, 0)	0.3
SA_superiorfrontal	anyalcohol_glassespermonth	Weighted mode	23	-1.45136e-05	7.26267e-05	(0, 0)	0.84
SA_superiorparietal	anyalcohol_glassespermonth	IVW(MRE)	28	2.94243e-05	2.65929e-05	(0, 0)	0.27
SA_superiorparietal	anyalcohol_glassespermonth	MR Egger	28	-4.65823e-05	5.36823e-05	(0, 0)	0.39
SA_superiorparietal	anyalcohol_glassespermonth	Weighted median	28	3.33379e-05	2.57367e-05	(0, 0)	0.2
SA_superiorparietal	anyalcohol_glassespermonth	Simple mode	28	2.98156e-05	4.29399e-05	(0, 0)	0.49
SA_superiorparietal	anyalcohol_glassespermonth	Weighted mode	28	2.75923e-05	3.32638e-05	(0, 0)	0.41
SA_superiortemporal	anyalcohol_glassespermonth	IVW(MRE)	22	-2.15494e-05	4.71616e-05	(0, 0)	0.65
SA_superiortemporal	anyalcohol_glassespermonth	MR Egger	22	0.000126647	0.00013906	(0, 0)	0.37
SA_superiortemporal	anyalcohol_glassespermonth	Weighted median	22	2.40939e-05	5.71628e-05	(0, 0)	0.67
SA_superiortemporal	anyalcohol_glassespermonth	Simple mode	22	5.3504e-05	0.000116607	(0, 0)	0.65
SA_superiortemporal	anyalcohol_glassespermonth	Weighted mode	22	7.35813e-05	9.91277e-05	(0, 0)	0.47
SA_supramarginal	anyalcohol_glassespermonth	IVW(MRE)	24	-3.20718e-06	3.76889e-05	(0, 0)	0.93
SA_supramarginal	anyalcohol_glassespermonth	MR Egger	24	2.8528e-06	9.00939e-05	(0, 0)	0.98
SA_supramarginal	anyalcohol_glassespermonth	Weighted median	24	-7.35685e-06	3.74832e-05	(0, 0)	0.84
SA_supramarginal	anyalcohol_glassespermonth	Simple mode	24	-1.28898e-05	6.62001e-05	(0, 0)	0.85
SA_supramarginal	anyalcohol_glassespermonth	Weighted mode	24	-2.48717e-05	5.05721e-05	(0, 0)	0.63
SA_temporalpole	anyalcohol_glassespermonth	IVW(MRE)	15	0.000596712	0.000643094	(0, 0)	0.35
SA_temporalpole	anyalcohol_glassespermonth	MR Egger	15	0.0006037	0.00117209	(0, 0)	0.62
SA_temporalpole	anyalcohol_glassespermonth	Weighted median	15	-0.000104534	0.000363885	(0, 0)	0.77
SA_temporalpole	anyalcohol_glassespermonth	Simple mode	15	-0.000190537	0.000510499	(0, 0)	0.71
SA_temporalpole	anyalcohol_glassespermonth	Weighted mode	15	-0.000190537	0.000404998	(0, 0)	0.65
SA_transversetemporal	anyalcohol_glassespermonth	IVW(MRE)	35	-0.000173274	0.000168211	(0, 0)	0.3
SA_transversetemporal	anyalcohol_glassespermonth	MR Egger	35	0.000260498	0.000400458	(0, 0)	0.52
SA_transversetemporal	anyalcohol_glassespermonth	Weighted median	35	-0.00037994	0.000208643	(0, 0)	0.07
SA_transversetemporal	anyalcohol_glassespermonth	Simple mode	35	-0.000514377	0.000460048	(0, 0)	0.27
SA_transversetemporal	anyalcohol_glassespermonth	Weighted mode	35	-0.000501458	0.000404767	(0, 0)	0.22
THICK_bankssts	anyalcohol_glassespermonth	IVW(MRE)	12	-0.0787349	0.241697	(-0.55, 0.39)	0.74
THICK_bankssts	anyalcohol_glassespermonth	MR Egger	12	-0.379239	0.621031	(-1.6, 0.84)	0.56
THICK_bankssts	anyalcohol_glassespermonth	Weighted median	12	0.337864	0.196506	(-0.05, 0.72)	0.09
THICK_bankssts	anyalcohol_glassespermonth	Simple mode	12	0.531708	0.314488	(-0.08, 1.15)	0.12
THICK_bankssts	anyalcohol_glassespermonth	Weighted mode	12	0.522172	0.310647	(-0.09, 1.13)	0.12
THICK_caudalanteriorcingulate	anyalcohol_glassespermonth	IVW(MRE)	10	-0.114804	0.0617682	(-0.24, 0.01)	0.06
THICK_caudalanteriorcingulate	anyalcohol_glassespermonth	MR Egger	10	-0.260742	0.118883	(-0.49, -0.03)	0.06
THICK_caudalanteriorcingulate	anyalcohol_glassespermonth	Weighted median	10	-0.171555	0.0844409	(-0.34, -0.01)	0.042
THICK_caudalanteriorcingulate	anyalcohol_glassespermonth	Simple mode	10	-0.123843	0.146451	(-0.41, 0.16)	0.42
THICK_caudalanteriorcingulate	anyalcohol_glassespermonth	Weighted mode	10	-0.165427	0.0927428	(-0.35, 0.02)	0.11
THICK_caudalmiddlefrontal	anyalcohol_glassespermonth	IVW(MRE)	12	-0.00677101	0.158026	(-0.32, 0.3)	0.97
THICK_caudalmiddlefrontal	anyalcohol_glassespermonth	MR Egger	12	0.140788	0.391698	(-0.63, 0.91)	0.73
THICK_caudalmiddlefrontal	anyalcohol_glassespermonth	Weighted median	12	0.118147	0.197304	(-0.27, 0.5)	0.55
THICK_caudalmiddlefrontal	anyalcohol_glassespermonth	Simple mode	12	0.350587	0.378188	(-0.39, 1.09)	0.37
THICK_caudalmiddlefrontal	anyalcohol_glassespermonth	Weighted mode	12	0.343335	0.365558	(-0.37, 1.06)	0.37
THICK_cuneus	anyalcohol_glassespermonth	IVW(MRE)	8	0.41629	0.584886	(-0.73, 1.56)	0.48
THICK_cuneus	anyalcohol_glassespermonth	MR Egger	8	0.657111	1.40854	(-2.1, 3.42)	0.66
THICK_cuneus	anyalcohol_glassespermonth	Weighted median	8	-0.160541	0.191436	(-0.54, 0.21)	0.4
THICK_cuneus	anyalcohol_glassespermonth	Simple mode	8	-0.179046	0.23219	(-0.63, 0.28)	0.47
THICK_cuneus	anyalcohol_glassespermonth	Weighted mode	8	-0.189768	0.228691	(-0.64, 0.26)	0.43
THICK_entorhinal	anyalcohol_glassespermonth	IVW(MRE)	9	0.0908114	0.0942864	(-0.09, 0.28)	0.34
THICK_entorhinal	anyalcohol_glassespermonth	MR Egger	9	-0.505177	0.283743	(-1.06, 0.05)	0.12
THICK_entorhinal	anyalcohol_glassespermonth	Weighted median	9	0.150095	0.0787558	(0, 0.3)	0.06
THICK_entorhinal	anyalcohol_glassespermonth	Simple mode	9	0.203007	0.134344	(-0.06, 0.47)	0.17
THICK_entorhinal	anyalcohol_glassespermonth	Weighted mode	9	0.203007	0.154285	(-0.1, 0.51)	0.22
THICK_frontalpole	anyalcohol_glassespermonth	IVW(MRE)	12	0.0230959	0.0436825	(-0.06, 0.11)	0.6
THICK_frontalpole	anyalcohol_glassespermonth	MR Egger	12	0.0932959	0.117894	(-0.14, 0.32)	0.45
THICK_frontalpole	anyalcohol_glassespermonth	Weighted median	12	-0.0121405	0.0704228	(-0.15, 0.13)	0.86
THICK_frontalpole	anyalcohol_glassespermonth	Simple mode	12	-0.00915842	0.126802	(-0.26, 0.24)	0.94
THICK_frontalpole	anyalcohol_glassespermonth	Weighted mode	12	-0.0513264	0.111404	(-0.27, 0.17)	0.65
THICK_fusiform	anyalcohol_glassespermonth	IVW(MRE)	8	0.242689	0.179607	(-0.11, 0.59)	0.18
THICK_fusiform	anyalcohol_glassespermonth	MR Egger	8	0.0865261	0.423451	(-0.74, 0.92)	0.84
THICK_fusiform	anyalcohol_glassespermonth	Weighted median	8	0.121359	0.216054	(-0.3, 0.54)	0.57
THICK_fusiform	anyalcohol_glassespermonth	Simple mode	8	0.0769697	0.373046	(-0.65, 0.81)	0.84
THICK_fusiform	anyalcohol_glassespermonth	Weighted mode	8	0.0579969	0.316924	(-0.56, 0.68)	0.86
THICK_inferiorparietal	anyalcohol_glassespermonth	IVW(MRE)	13	0.140537	0.198897	(-0.25, 0.53)	0.48
THICK_inferiorparietal	anyalcohol_glassespermonth	MR Egger	13	0.327437	0.482994	(-0.62, 1.27)	0.51
THICK_inferiorparietal	anyalcohol_glassespermonth	Weighted median	13	0.0566275	0.235663	(-0.41, 0.52)	0.81
THICK_inferiorparietal	anyalcohol_glassespermonth	Simple mode	13	0.0848172	0.416154	(-0.73, 0.9)	0.84
THICK_inferiorparietal	anyalcohol_glassespermonth	Weighted mode	13	0.113315	0.404793	(-0.68, 0.91)	0.78
THICK_inferiortemporal	anyalcohol_glassespermonth	IVW(MRE)	18	-0.144277	0.222802	(-0.58, 0.29)	0.52
THICK_inferiortemporal	anyalcohol_glassespermonth	MR Egger	18	0.303142	0.413561	(-0.51, 1.11)	0.47
THICK_inferiortemporal	anyalcohol_glassespermonth	Weighted median	18	0.0860845	0.130228	(-0.17, 0.34)	0.51
THICK_inferiortemporal	anyalcohol_glassespermonth	Simple mode	18	0.106024	0.21022	(-0.31, 0.52)	0.62
THICK_inferiortemporal	anyalcohol_glassespermonth	Weighted mode	18	0.117407	0.178022	(-0.23, 0.47)	0.52
THICK_insula	anyalcohol_glassespermonth	IVW(MRE)	14	0.106182	0.159251	(-0.21, 0.42)	0.5
THICK_insula	anyalcohol_glassespermonth	MR Egger	14	-0.413455	0.40102	(-1.2, 0.37)	0.32
THICK_insula	anyalcohol_glassespermonth	Weighted median	14	-0.0313169	0.13845	(-0.3, 0.24)	0.82
THICK_insula	anyalcohol_glassespermonth	Simple mode	14	0.0176935	0.223447	(-0.42, 0.46)	0.94
THICK_insula	anyalcohol_glassespermonth	Weighted mode	14	0.00957937	0.198135	(-0.38, 0.4)	0.96
THICK_isthmuscingulate	anyalcohol_glassespermonth	IVW(MRE)	28	-0.091214	0.0487022	(-0.19, 0)	0.06
THICK_isthmuscingulate	anyalcohol_glassespermonth	MR Egger	28	-0.0868281	0.117803	(-0.32, 0.14)	0.47
THICK_isthmuscingulate	anyalcohol_glassespermonth	Weighted median	28	-0.0887765	0.0709433	(-0.23, 0.05)	0.21
THICK_isthmuscingulate	anyalcohol_glassespermonth	Simple mode	28	-0.0745383	0.129981	(-0.33, 0.18)	0.57
THICK_isthmuscingulate	anyalcohol_glassespermonth	Weighted mode	28	-0.0673645	0.125956	(-0.31, 0.18)	0.6
THICK_lateraloccipital	anyalcohol_glassespermonth	IVW(MRE)	13	0.000282252	0.152291	(-0.3, 0.3)	1
THICK_lateraloccipital	anyalcohol_glassespermonth	MR Egger	13	0.0332745	0.343292	(-0.64, 0.71)	0.92
THICK_lateraloccipital	anyalcohol_glassespermonth	Weighted median	13	-0.123251	0.188147	(-0.49, 0.25)	0.51
THICK_lateraloccipital	anyalcohol_glassespermonth	Simple mode	13	-0.324298	0.346579	(-1, 0.35)	0.37
THICK_lateraloccipital	anyalcohol_glassespermonth	Weighted mode	13	-0.174134	0.329448	(-0.82, 0.47)	0.61
THICK_lateralorbitofrontal	anyalcohol_glassespermonth	IVW(MRE)	7	-0.140843	0.171359	(-0.48, 0.2)	0.41
THICK_lateralorbitofrontal	anyalcohol_glassespermonth	MR Egger	7	0.357673	0.21839	(-0.07, 0.79)	0.16
THICK_lateralorbitofrontal	anyalcohol_glassespermonth	Weighted median	7	-0.210474	0.198443	(-0.6, 0.18)	0.29
THICK_lateralorbitofrontal	anyalcohol_glassespermonth	Simple mode	7	-0.521249	0.348058	(-1.2, 0.16)	0.18
THICK_lateralorbitofrontal	anyalcohol_glassespermonth	Weighted mode	7	0.237354	0.311867	(-0.37, 0.85)	0.48
THICK_lingual	anyalcohol_glassespermonth	IVW(MRE)	14	0.366786	0.177846	(0.02, 0.72)	0.039
THICK_lingual	anyalcohol_glassespermonth	MR Egger	14	0.252531	0.502737	(-0.73, 1.24)	0.62
THICK_lingual	anyalcohol_glassespermonth	Weighted median	14	0.158728	0.20058	(-0.23, 0.55)	0.43
THICK_lingual	anyalcohol_glassespermonth	Simple mode	14	0.146935	0.331319	(-0.5, 0.8)	0.66
THICK_lingual	anyalcohol_glassespermonth	Weighted mode	14	0.118751	0.270106	(-0.41, 0.65)	0.67
THICK_medialorbitofrontal	anyalcohol_glassespermonth	IVW(MRE)	14	-0.239885	0.10554	(-0.45, -0.03)	0.023
THICK_medialorbitofrontal	anyalcohol_glassespermonth	MR Egger	14	0.00306063	0.298078	(-0.58, 0.59)	0.99
THICK_medialorbitofrontal	anyalcohol_glassespermonth	Weighted median	14	-0.197761	0.128004	(-0.45, 0.05)	0.12
THICK_medialorbitofrontal	anyalcohol_glassespermonth	Simple mode	14	-0.416579	0.225859	(-0.86, 0.03)	0.09
THICK_medialorbitofrontal	anyalcohol_glassespermonth	Weighted mode	14	-0.299138	0.226473	(-0.74, 0.14)	0.21
THICK_middletemporal	anyalcohol_glassespermonth	IVW(MRE)	10	-0.309543	0.208486	(-0.72, 0.1)	0.14
THICK_middletemporal	anyalcohol_glassespermonth	MR Egger	10	-0.532425	0.485956	(-1.48, 0.42)	0.31
THICK_middletemporal	anyalcohol_glassespermonth	Weighted median	10	0.0697593	0.197379	(-0.32, 0.46)	0.72
THICK_middletemporal	anyalcohol_glassespermonth	Simple mode	10	0.185536	0.310583	(-0.42, 0.79)	0.56
THICK_middletemporal	anyalcohol_glassespermonth	Weighted mode	10	0.172054	0.310027	(-0.44, 0.78)	0.59
THICK_paracentral	anyalcohol_glassespermonth	IVW(MRE)	14	-0.131571	0.113626	(-0.35, 0.09)	0.25
THICK_paracentral	anyalcohol_glassespermonth	MR Egger	14	0.231258	0.225867	(-0.21, 0.67)	0.33
THICK_paracentral	anyalcohol_glassespermonth	Weighted median	14	0.054433	0.148303	(-0.24, 0.35)	0.71
THICK_paracentral	anyalcohol_glassespermonth	Simple mode	14	0.151036	0.285775	(-0.41, 0.71)	0.61
THICK_paracentral	anyalcohol_glassespermonth	Weighted mode	14	0.196938	0.244876	(-0.28, 0.68)	0.44
THICK_parahippocampal	anyalcohol_glassespermonth	IVW(MRE)	26	0.00431744	0.044314	(-0.08, 0.09)	0.92
THICK_parahippocampal	anyalcohol_glassespermonth	MR Egger	26	-0.00966671	0.102858	(-0.21, 0.19)	0.93
THICK_parahippocampal	anyalcohol_glassespermonth	Weighted median	26	-0.0526084	0.0491446	(-0.15, 0.04)	0.28
THICK_parahippocampal	anyalcohol_glassespermonth	Simple mode	26	-0.115405	0.0878085	(-0.29, 0.06)	0.2
THICK_parahippocampal	anyalcohol_glassespermonth	Weighted mode	26	-0.096019	0.0837911	(-0.26, 0.07)	0.26
THICK_parsopercularis	anyalcohol_glassespermonth	IVW(MRE)	16	-0.0930731	0.0953208	(-0.28, 0.09)	0.33
THICK_parsopercularis	anyalcohol_glassespermonth	MR Egger	16	-0.175359	0.28797	(-0.74, 0.39)	0.55
THICK_parsopercularis	anyalcohol_glassespermonth	Weighted median	16	-0.0407742	0.150801	(-0.34, 0.25)	0.79
THICK_parsopercularis	anyalcohol_glassespermonth	Simple mode	16	-0.0303185	0.246396	(-0.51, 0.45)	0.9
THICK_parsopercularis	anyalcohol_glassespermonth	Weighted mode	16	-0.0303185	0.22348	(-0.47, 0.41)	0.89
THICK_parsorbitalis	anyalcohol_glassespermonth	IVW(MRE)	12	0.0598091	0.0835457	(-0.1, 0.22)	0.47
THICK_parsorbitalis	anyalcohol_glassespermonth	MR Egger	12	0.247061	0.161326	(-0.07, 0.56)	0.16
THICK_parsorbitalis	anyalcohol_glassespermonth	Weighted median	12	0.143251	0.107246	(-0.07, 0.35)	0.18
THICK_parsorbitalis	anyalcohol_glassespermonth	Simple mode	12	0.22074	0.179446	(-0.13, 0.57)	0.24
THICK_parsorbitalis	anyalcohol_glassespermonth	Weighted mode	12	0.17692	0.133635	(-0.09, 0.44)	0.21
THICK_parstriangularis	anyalcohol_glassespermonth	IVW(MRE)	18	-0.153469	0.124829	(-0.4, 0.09)	0.22
THICK_parstriangularis	anyalcohol_glassespermonth	MR Egger	18	0.0402182	0.280208	(-0.51, 0.59)	0.89
THICK_parstriangularis	anyalcohol_glassespermonth	Weighted median	18	0.0856981	0.148593	(-0.21, 0.38)	0.56
THICK_parstriangularis	anyalcohol_glassespermonth	Simple mode	18	0.147105	0.271706	(-0.39, 0.68)	0.6
THICK_parstriangularis	anyalcohol_glassespermonth	Weighted mode	18	0.147105	0.257736	(-0.36, 0.65)	0.58
THICK_pericalcarine	anyalcohol_glassespermonth	IVW(MRE)	18	-0.064042	0.0926373	(-0.25, 0.12)	0.49
THICK_pericalcarine	anyalcohol_glassespermonth	MR Egger	18	0.239884	0.286706	(-0.32, 0.8)	0.42
THICK_pericalcarine	anyalcohol_glassespermonth	Weighted median	18	-0.0475047	0.136271	(-0.31, 0.22)	0.73
THICK_pericalcarine	anyalcohol_glassespermonth	Simple mode	18	-0.0362134	0.224774	(-0.48, 0.4)	0.87
THICK_pericalcarine	anyalcohol_glassespermonth	Weighted mode	18	-0.030901	0.207493	(-0.44, 0.38)	0.88
THICK_postcentral	anyalcohol_glassespermonth	IVW(MRE)	24	0.0750621	0.115128	(-0.15, 0.3)	0.51
THICK_postcentral	anyalcohol_glassespermonth	MR Egger	24	0.323441	0.218119	(-0.1, 0.75)	0.15
THICK_postcentral	anyalcohol_glassespermonth	Weighted median	24	0.14271	0.132242	(-0.12, 0.4)	0.28
THICK_postcentral	anyalcohol_glassespermonth	Simple mode	24	0.236976	0.234587	(-0.22, 0.7)	0.32
THICK_postcentral	anyalcohol_glassespermonth	Weighted mode	24	0.18033	0.142524	(-0.1, 0.46)	0.22
THICK_posteriorcingulate	anyalcohol_glassespermonth	IVW(MRE)	13	-0.0682061	0.141584	(-0.35, 0.21)	0.63
THICK_posteriorcingulate	anyalcohol_glassespermonth	MR Egger	13	-0.750176	0.476562	(-1.68, 0.18)	0.14
THICK_posteriorcingulate	anyalcohol_glassespermonth	Weighted median	13	-0.0683171	0.157148	(-0.38, 0.24)	0.66
THICK_posteriorcingulate	anyalcohol_glassespermonth	Simple mode	13	-0.0983005	0.292536	(-0.67, 0.48)	0.74
THICK_posteriorcingulate	anyalcohol_glassespermonth	Weighted mode	13	-0.080374	0.246405	(-0.56, 0.4)	0.75
THICK_precentral	anyalcohol_glassespermonth	IVW(MRE)	14	-0.133111	0.137889	(-0.4, 0.14)	0.33
THICK_precentral	anyalcohol_glassespermonth	MR Egger	14	0.0867981	0.385368	(-0.67, 0.84)	0.83
THICK_precentral	anyalcohol_glassespermonth	Weighted median	14	-0.345084	0.175325	(-0.69, 0)	0.049
THICK_precentral	anyalcohol_glassespermonth	Simple mode	14	-0.501802	0.303142	(-1.1, 0.09)	0.12
THICK_precentral	anyalcohol_glassespermonth	Weighted mode	14	-0.501802	0.347247	(-1.18, 0.18)	0.17
THICK_precuneus	anyalcohol_glassespermonth	IVW(MRE)	20	-0.150598	0.178471	(-0.5, 0.2)	0.4
THICK_precuneus	anyalcohol_glassespermonth	MR Egger	20	-0.380242	0.432769	(-1.23, 0.47)	0.39
THICK_precuneus	anyalcohol_glassespermonth	Weighted median	20	0.125335	0.203684	(-0.27, 0.52)	0.54
THICK_precuneus	anyalcohol_glassespermonth	Simple mode	20	0.206898	0.487304	(-0.75, 1.16)	0.68
THICK_precuneus	anyalcohol_glassespermonth	Weighted mode	20	0.226613	0.396181	(-0.55, 1)	0.57
THICK_rostralanteriorcingulate	anyalcohol_glassespermonth	IVW(MRE)	23	-0.00614092	0.0775507	(-0.16, 0.15)	0.94
THICK_rostralanteriorcingulate	anyalcohol_glassespermonth	MR Egger	23	0.0924966	0.192179	(-0.28, 0.47)	0.64
THICK_rostralanteriorcingulate	anyalcohol_glassespermonth	Weighted median	23	-0.0464173	0.0808688	(-0.2, 0.11)	0.57
THICK_rostralanteriorcingulate	anyalcohol_glassespermonth	Simple mode	23	-0.118271	0.179136	(-0.47, 0.23)	0.52
THICK_rostralanteriorcingulate	anyalcohol_glassespermonth	Weighted mode	23	-0.113668	0.156813	(-0.42, 0.19)	0.48
THICK_rostralmiddlefrontal	anyalcohol_glassespermonth	IVW(MRE)	14	-0.227542	0.150613	(-0.52, 0.07)	0.13
THICK_rostralmiddlefrontal	anyalcohol_glassespermonth	MR Egger	14	0.06893	0.431549	(-0.78, 0.91)	0.88
THICK_rostralmiddlefrontal	anyalcohol_glassespermonth	Weighted median	14	-0.0104836	0.196548	(-0.4, 0.37)	0.96
THICK_rostralmiddlefrontal	anyalcohol_glassespermonth	Simple mode	14	-0.0333972	0.337014	(-0.69, 0.63)	0.92
THICK_rostralmiddlefrontal	anyalcohol_glassespermonth	Weighted mode	14	-0.0333972	0.310522	(-0.64, 0.58)	0.92
THICK_superiorfrontal	anyalcohol_glassespermonth	IVW(MRE)	22	-0.270292	0.226768	(-0.71, 0.17)	0.23
THICK_superiorfrontal	anyalcohol_glassespermonth	MR Egger	22	0.98348	0.449732	(0.1, 1.86)	0.041
THICK_superiorfrontal	anyalcohol_glassespermonth	Weighted median	22	-0.113028	0.177944	(-0.46, 0.24)	0.53
THICK_superiorfrontal	anyalcohol_glassespermonth	Simple mode	22	-0.323616	0.351598	(-1.01, 0.37)	0.37
THICK_superiorfrontal	anyalcohol_glassespermonth	Weighted mode	22	-0.210846	0.299908	(-0.8, 0.38)	0.49
THICK_superiorparietal	anyalcohol_glassespermonth	IVW(MRE)	14	0.126421	0.152809	(-0.17, 0.43)	0.41
THICK_superiorparietal	anyalcohol_glassespermonth	MR Egger	14	0.429263	0.427943	(-0.41, 1.27)	0.34
THICK_superiorparietal	anyalcohol_glassespermonth	Weighted median	14	0.232278	0.204635	(-0.17, 0.63)	0.26
THICK_superiorparietal	anyalcohol_glassespermonth	Simple mode	14	0.31054	0.347365	(-0.37, 0.99)	0.39
THICK_superiorparietal	anyalcohol_glassespermonth	Weighted mode	14	0.344944	0.327458	(-0.3, 0.99)	0.31
THICK_superiortemporal	anyalcohol_glassespermonth	IVW(MRE)	11	-0.0135972	0.211576	(-0.43, 0.4)	0.95
THICK_superiortemporal	anyalcohol_glassespermonth	MR Egger	11	0.0337856	0.457406	(-0.86, 0.93)	0.94
THICK_superiortemporal	anyalcohol_glassespermonth	Weighted median	11	-0.0385259	0.192382	(-0.42, 0.34)	0.84
THICK_superiortemporal	anyalcohol_glassespermonth	Simple mode	11	-0.00234746	0.311176	(-0.61, 0.61)	0.99
THICK_superiortemporal	anyalcohol_glassespermonth	Weighted mode	11	-0.0287106	0.252813	(-0.52, 0.47)	0.91
THICK_supramarginal	anyalcohol_glassespermonth	IVW(MRE)	20	0.195114	0.164891	(-0.13, 0.52)	0.24
THICK_supramarginal	anyalcohol_glassespermonth	MR Egger	20	-0.503087	0.393338	(-1.27, 0.27)	0.22
THICK_supramarginal	anyalcohol_glassespermonth	Weighted median	20	0.133215	0.190368	(-0.24, 0.51)	0.48
THICK_supramarginal	anyalcohol_glassespermonth	Simple mode	20	-0.00525039	0.359364	(-0.71, 0.7)	0.99
THICK_supramarginal	anyalcohol_glassespermonth	Weighted mode	20	-0.116081	0.335776	(-0.77, 0.54)	0.73
THICK_temporalpole	anyalcohol_glassespermonth	IVW(MRE)	6	-0.0744992	0.0730278	(-0.22, 0.07)	0.31
THICK_temporalpole	anyalcohol_glassespermonth	MR Egger	6	0.086294	0.106971	(-0.12, 0.3)	0.47
THICK_temporalpole	anyalcohol_glassespermonth	Weighted median	6	-0.0522978	0.0885799	(-0.23, 0.12)	0.55
THICK_temporalpole	anyalcohol_glassespermonth	Simple mode	6	-0.0587017	0.126649	(-0.31, 0.19)	0.66
THICK_temporalpole	anyalcohol_glassespermonth	Weighted mode	6	-0.0386346	0.108859	(-0.25, 0.17)	0.74
THICK_transversetemporal	anyalcohol_glassespermonth	IVW(MRE)	12	-0.0811416	0.0778235	(-0.23, 0.07)	0.3
THICK_transversetemporal	anyalcohol_glassespermonth	MR Egger	12	0.0203464	0.195118	(-0.36, 0.4)	0.92
THICK_transversetemporal	anyalcohol_glassespermonth	Weighted median	12	-0.0767074	0.099254	(-0.27, 0.12)	0.44
THICK_transversetemporal	anyalcohol_glassespermonth	Simple mode	12	-0.0425665	0.155593	(-0.35, 0.26)	0.79
THICK_transversetemporal	anyalcohol_glassespermonth	Weighted mode	12	-0.045933	0.129098	(-0.3, 0.21)	0.73
SA_bankssts	beef_overallfreq	IVW(MRE)	19	4.50353e-05	0.000101761	(0, 0)	0.66
SA_bankssts	beef_overallfreq	MR Egger	19	0.000280255	0.000344637	(0, 0)	0.43
SA_bankssts	beef_overallfreq	Weighted median	19	-3.40082e-07	0.000138884	(0, 0)	1
SA_bankssts	beef_overallfreq	Simple mode	19	-0.000226638	0.000263429	(0, 0)	0.4
SA_bankssts	beef_overallfreq	Weighted mode	19	-0.000197553	0.000240317	(0, 0)	0.42
SA_caudalanteriorcingulate	beef_overallfreq	IVW(MRE)	15	0.000420902	0.00013248	(0, 0)	0.0015
SA_caudalanteriorcingulate	beef_overallfreq	MR Egger	15	6.73622e-05	0.00039979	(0, 0)	0.87
SA_caudalanteriorcingulate	beef_overallfreq	Weighted median	15	0.000423322	0.000176183	(0, 0)	0.016
SA_caudalanteriorcingulate	beef_overallfreq	Simple mode	15	0.000776776	0.00032738	(0, 0)	0.033
SA_caudalanteriorcingulate	beef_overallfreq	Weighted mode	15	0.000337189	0.000299426	(0, 0)	0.28
SA_caudalmiddlefrontal	beef_overallfreq	IVW(MRE)	28	-6.50226e-05	3.61915e-05	(0, 0)	0.07
SA_caudalmiddlefrontal	beef_overallfreq	MR Egger	28	2.74835e-05	0.00010261	(0, 0)	0.79
SA_caudalmiddlefrontal	beef_overallfreq	Weighted median	28	-5.83146e-05	4.36329e-05	(0, 0)	0.18
SA_caudalmiddlefrontal	beef_overallfreq	Simple mode	28	-6.17433e-05	7.65077e-05	(0, 0)	0.43
SA_caudalmiddlefrontal	beef_overallfreq	Weighted mode	28	-5.67401e-05	6.97296e-05	(0, 0)	0.42
SA_cuneus	beef_overallfreq	IVW(MRE)	23	9.68713e-05	6.25416e-05	(0, 0)	0.12
SA_cuneus	beef_overallfreq	MR Egger	23	0.000129008	0.000222177	(0, 0)	0.57
SA_cuneus	beef_overallfreq	Weighted median	23	7.58501e-05	8.57369e-05	(0, 0)	0.38
SA_cuneus	beef_overallfreq	Simple mode	23	0.000138367	0.000154234	(0, 0)	0.38
SA_cuneus	beef_overallfreq	Weighted mode	23	8.1378e-05	0.000142195	(0, 0)	0.57
SA_entorhinal	beef_overallfreq	IVW(MRE)	15	0.000313929	0.000245728	(0, 0)	0.2
SA_entorhinal	beef_overallfreq	MR Egger	15	0.000389271	0.000998034	(0, 0)	0.7
SA_entorhinal	beef_overallfreq	Weighted median	15	0.000206961	0.000265223	(0, 0)	0.44
SA_entorhinal	beef_overallfreq	Simple mode	15	0.000403982	0.000501704	(0, 0)	0.43
SA_entorhinal	beef_overallfreq	Weighted mode	15	0.000416771	0.000474575	(0, 0)	0.39
SA_frontalpole	beef_overallfreq	IVW(MRE)	11	-8.70676e-07	0.000507535	(0, 0)	1
SA_frontalpole	beef_overallfreq	MR Egger	11	0.000562467	0.00111952	(0, 0)	0.63
SA_frontalpole	beef_overallfreq	Weighted median	11	0.000148399	0.000579704	(0, 0)	0.8
SA_frontalpole	beef_overallfreq	Simple mode	11	0.00101388	0.000838453	(0, 0)	0.25
SA_frontalpole	beef_overallfreq	Weighted mode	11	0.000358918	0.000712209	(0, 0)	0.63
SA_fusiform	beef_overallfreq	IVW(MRE)	19	2.15088e-05	4.63294e-05	(0, 0)	0.64
SA_fusiform	beef_overallfreq	MR Egger	19	0.000115943	0.000130168	(0, 0)	0.39
SA_fusiform	beef_overallfreq	Weighted median	19	5.66243e-05	5.86284e-05	(0, 0)	0.33
SA_fusiform	beef_overallfreq	Simple mode	19	6.79577e-05	0.000117805	(0, 0)	0.57
SA_fusiform	beef_overallfreq	Weighted mode	19	6.52724e-05	0.000112022	(0, 0)	0.57
SA_inferiorparietal	beef_overallfreq	IVW(MRE)	31	-3.24462e-05	2.34912e-05	(0, 0)	0.17
SA_inferiorparietal	beef_overallfreq	MR Egger	31	-1.07316e-05	6.18002e-05	(0, 0)	0.86
SA_inferiorparietal	beef_overallfreq	Weighted median	31	-5.32021e-05	2.71247e-05	(0, 0)	0.05
SA_inferiorparietal	beef_overallfreq	Simple mode	31	-8.06053e-05	6.63522e-05	(0, 0)	0.23
SA_inferiorparietal	beef_overallfreq	Weighted mode	31	-8.23194e-05	6.50095e-05	(0, 0)	0.22
SA_inferiortemporal	beef_overallfreq	IVW(MRE)	27	-3.73155e-05	3.59636e-05	(0, 0)	0.3
SA_inferiortemporal	beef_overallfreq	MR Egger	27	-0.000220437	0.00010541	(0, 0)	0.047
SA_inferiortemporal	beef_overallfreq	Weighted median	27	-2.89288e-05	4.47738e-05	(0, 0)	0.52
SA_inferiortemporal	beef_overallfreq	Simple mode	27	-5.77021e-06	9.51202e-05	(0, 0)	0.95
SA_inferiortemporal	beef_overallfreq	Weighted mode	27	-1.06115e-05	8.42623e-05	(0, 0)	0.9
SA_insula	beef_overallfreq	IVW(MRE)	29	2.96137e-06	6.82465e-05	(0, 0)	0.97
SA_insula	beef_overallfreq	MR Egger	29	-8.825e-05	0.000164848	(0, 0)	0.6
SA_insula	beef_overallfreq	Weighted median	29	4.91222e-05	7.25616e-05	(0, 0)	0.5
SA_insula	beef_overallfreq	Simple mode	29	0.000118818	0.00013719	(0, 0)	0.39
SA_insula	beef_overallfreq	Weighted mode	29	9.79339e-05	0.000118686	(0, 0)	0.42
SA_isthmuscingulate	beef_overallfreq	IVW(MRE)	20	-0.000156557	0.000110899	(0, 0)	0.16
SA_isthmuscingulate	beef_overallfreq	MR Egger	20	1.44466e-05	0.00030121	(0, 0)	0.96
SA_isthmuscingulate	beef_overallfreq	Weighted median	20	-7.1024e-05	0.000135617	(0, 0)	0.6
SA_isthmuscingulate	beef_overallfreq	Simple mode	20	1.67225e-06	0.000282352	(0, 0)	1
SA_isthmuscingulate	beef_overallfreq	Weighted mode	20	7.65135e-06	0.000272325	(0, 0)	0.98
SA_lateraloccipital	beef_overallfreq	IVW(MRE)	20	-3.6101e-06	3.74206e-05	(0, 0)	0.92
SA_lateraloccipital	beef_overallfreq	MR Egger	20	-5.70964e-05	0.000162784	(0, 0)	0.73
SA_lateraloccipital	beef_overallfreq	Weighted median	20	-4.37704e-05	4.32707e-05	(0, 0)	0.31
SA_lateraloccipital	beef_overallfreq	Simple mode	20	-4.20765e-05	7.7822e-05	(0, 0)	0.6
SA_lateraloccipital	beef_overallfreq	Weighted mode	20	-4.90091e-05	5.61896e-05	(0, 0)	0.39
SA_lateralorbitofrontal	beef_overallfreq	IVW(MRE)	24	-0.000103109	6.38332e-05	(0, 0)	0.11
SA_lateralorbitofrontal	beef_overallfreq	MR Egger	24	-0.000108022	0.000253669	(0, 0)	0.67
SA_lateralorbitofrontal	beef_overallfreq	Weighted median	24	-0.000138474	6.95776e-05	(0, 0)	0.047
SA_lateralorbitofrontal	beef_overallfreq	Simple mode	24	-0.000185775	0.000135415	(0, 0)	0.18
SA_lateralorbitofrontal	beef_overallfreq	Weighted mode	24	-0.000169263	0.000109373	(0, 0)	0.14
SA_lingual	beef_overallfreq	IVW(MRE)	39	6.02631e-05	2.92461e-05	(0, 0)	0.039
SA_lingual	beef_overallfreq	MR Egger	39	2.96444e-05	8.60051e-05	(0, 0)	0.73
SA_lingual	beef_overallfreq	Weighted median	39	3.66177e-05	3.54573e-05	(0, 0)	0.3
SA_lingual	beef_overallfreq	Simple mode	39	6.68917e-05	7.54859e-05	(0, 0)	0.38
SA_lingual	beef_overallfreq	Weighted mode	39	3.41363e-05	6.51935e-05	(0, 0)	0.6
SA_medialorbitofrontal	beef_overallfreq	IVW(MRE)	10	-2.47799e-07	6.37803e-05	(0, 0)	1
SA_medialorbitofrontal	beef_overallfreq	MR Egger	10	0.000350949	0.000263732	(0, 0)	0.22
SA_medialorbitofrontal	beef_overallfreq	Weighted median	10	-1.37624e-05	0.000123869	(0, 0)	0.91
SA_medialorbitofrontal	beef_overallfreq	Simple mode	10	-4.03341e-05	0.000188299	(0, 0)	0.84
SA_medialorbitofrontal	beef_overallfreq	Weighted mode	10	-2.26404e-05	0.000188598	(0, 0)	0.91
SA_middletemporal	beef_overallfreq	IVW(MRE)	22	-3.75246e-05	5.00918e-05	(0, 0)	0.45
SA_middletemporal	beef_overallfreq	MR Egger	22	-0.00016877	0.000153404	(0, 0)	0.28
SA_middletemporal	beef_overallfreq	Weighted median	22	-5.20334e-06	6.04525e-05	(0, 0)	0.93
SA_middletemporal	beef_overallfreq	Simple mode	22	5.44278e-05	0.000122969	(0, 0)	0.66
SA_middletemporal	beef_overallfreq	Weighted mode	22	5.74815e-05	0.000100715	(0, 0)	0.57
SA_paracentral	beef_overallfreq	IVW(MRE)	26	-2.01927e-05	8.41693e-05	(0, 0)	0.81
SA_paracentral	beef_overallfreq	MR Egger	26	-0.000168198	0.000178692	(0, 0)	0.36
SA_paracentral	beef_overallfreq	Weighted median	26	7.79904e-05	8.86803e-05	(0, 0)	0.38
SA_paracentral	beef_overallfreq	Simple mode	26	7.67476e-05	0.000154629	(0, 0)	0.62
SA_paracentral	beef_overallfreq	Weighted mode	26	0.000101279	0.000120586	(0, 0)	0.41
SA_parahippocampal	beef_overallfreq	IVW(MRE)	15	1.16139e-05	0.000103941	(0, 0)	0.91
SA_parahippocampal	beef_overallfreq	MR Egger	15	0.00020908	0.000291446	(0, 0)	0.49
SA_parahippocampal	beef_overallfreq	Weighted median	15	-1.16972e-05	0.000190641	(0, 0)	0.95
SA_parahippocampal	beef_overallfreq	Simple mode	15	-0.000343962	0.000341734	(0, 0)	0.33
SA_parahippocampal	beef_overallfreq	Weighted mode	15	-7.07745e-05	0.000339786	(0, 0)	0.84
SA_parsopercularis	beef_overallfreq	IVW(MRE)	20	-7.20422e-06	3.61568e-05	(0, 0)	0.84
SA_parsopercularis	beef_overallfreq	MR Egger	20	-5.73049e-05	0.000106042	(0, 0)	0.6
SA_parsopercularis	beef_overallfreq	Weighted median	20	-5.87243e-05	6.95271e-05	(0, 0)	0.4
SA_parsopercularis	beef_overallfreq	Simple mode	20	-0.000101061	0.000117144	(0, 0)	0.4
SA_parsopercularis	beef_overallfreq	Weighted mode	20	-9.90792e-05	0.000113024	(0, 0)	0.39
SA_parsorbitalis	beef_overallfreq	IVW(MRE)	12	-3.06867e-05	0.000323712	(0, 0)	0.92
SA_parsorbitalis	beef_overallfreq	MR Egger	12	-0.000904161	0.00127303	(0, 0)	0.49
SA_parsorbitalis	beef_overallfreq	Weighted median	12	-0.000125447	0.000319638	(0, 0)	0.69
SA_parsorbitalis	beef_overallfreq	Simple mode	12	-0.000149715	0.000519049	(0, 0)	0.78
SA_parsorbitalis	beef_overallfreq	Weighted mode	12	-0.000176317	0.000519158	(0, 0)	0.74
SA_parstriangularis	beef_overallfreq	IVW(MRE)	27	-3.2696e-05	3.03537e-05	(0, 0)	0.28
SA_parstriangularis	beef_overallfreq	MR Egger	27	-3.06488e-05	0.00010693	(0, 0)	0.78
SA_parstriangularis	beef_overallfreq	Weighted median	27	-2.08677e-05	6.29815e-05	(0, 0)	0.74
SA_parstriangularis	beef_overallfreq	Simple mode	27	-7.07337e-07	0.000115391	(0, 0)	1
SA_parstriangularis	beef_overallfreq	Weighted mode	27	-4.67161e-06	9.69697e-05	(0, 0)	0.96
SA_pericalcarine	beef_overallfreq	IVW(MRE)	39	7.17579e-06	3.3885e-05	(0, 0)	0.83
SA_pericalcarine	beef_overallfreq	MR Egger	39	-4.63069e-05	0.000104807	(0, 0)	0.66
SA_pericalcarine	beef_overallfreq	Weighted median	39	-9.03178e-08	4.64675e-05	(0, 0)	1
SA_pericalcarine	beef_overallfreq	Simple mode	39	-2.30191e-06	8.38125e-05	(0, 0)	0.98
SA_pericalcarine	beef_overallfreq	Weighted mode	39	-2.30191e-06	7.31503e-05	(0, 0)	0.98
SA_postcentral	beef_overallfreq	IVW(MRE)	21	-3.7516e-05	4.65173e-05	(0, 0)	0.42
SA_postcentral	beef_overallfreq	MR Egger	21	-5.36202e-05	0.00011154	(0, 0)	0.64
SA_postcentral	beef_overallfreq	Weighted median	21	-5.77856e-05	4.88854e-05	(0, 0)	0.24
SA_postcentral	beef_overallfreq	Simple mode	21	-0.000149218	8.3732e-05	(0, 0)	0.09
SA_postcentral	beef_overallfreq	Weighted mode	21	-6.50912e-05	5.31877e-05	(0, 0)	0.24
SA_posteriorcingulate	beef_overallfreq	IVW(MRE)	24	-7.46787e-05	0.000139884	(0, 0)	0.59
SA_posteriorcingulate	beef_overallfreq	MR Egger	24	0.000374144	0.000427014	(0, 0)	0.39
SA_posteriorcingulate	beef_overallfreq	Weighted median	24	-8.1154e-05	0.000126861	(0, 0)	0.52
SA_posteriorcingulate	beef_overallfreq	Simple mode	24	-0.000105558	0.000238602	(0, 0)	0.66
SA_posteriorcingulate	beef_overallfreq	Weighted mode	24	-0.000132345	0.000230025	(0, 0)	0.57
SA_precentral	beef_overallfreq	IVW(MRE)	25	2.11287e-05	2.13348e-05	(0, 0)	0.32
SA_precentral	beef_overallfreq	MR Egger	25	-1.5846e-06	3.50764e-05	(0, 0)	0.96
SA_precentral	beef_overallfreq	Weighted median	25	-3.00784e-05	3.05881e-05	(0, 0)	0.33
SA_precentral	beef_overallfreq	Simple mode	25	-1.5191e-05	6.18027e-05	(0, 0)	0.81
SA_precentral	beef_overallfreq	Weighted mode	25	-2.46285e-05	3.0117e-05	(0, 0)	0.42
SA_precuneus	beef_overallfreq	IVW(MRE)	31	1.17839e-05	2.76355e-05	(0, 0)	0.67
SA_precuneus	beef_overallfreq	MR Egger	31	-4.30869e-05	6.58787e-05	(0, 0)	0.52
SA_precuneus	beef_overallfreq	Weighted median	31	3.99402e-06	3.88555e-05	(0, 0)	0.92
SA_precuneus	beef_overallfreq	Simple mode	31	2.68704e-05	7.91063e-05	(0, 0)	0.74
SA_precuneus	beef_overallfreq	Weighted mode	31	1.88084e-05	6.44056e-05	(0, 0)	0.77
SA_rostralanteriorcingulate	beef_overallfreq	IVW(MRE)	16	-8.49448e-05	0.000106383	(0, 0)	0.42
SA_rostralanteriorcingulate	beef_overallfreq	MR Egger	16	-2.37099e-05	0.000218768	(0, 0)	0.92
SA_rostralanteriorcingulate	beef_overallfreq	Weighted median	16	-4.52595e-05	0.000145181	(0, 0)	0.76
SA_rostralanteriorcingulate	beef_overallfreq	Simple mode	16	-8.93183e-05	0.000220864	(0, 0)	0.69
SA_rostralanteriorcingulate	beef_overallfreq	Weighted mode	16	-7.84482e-05	0.000215152	(0, 0)	0.72
SA_rostralmiddlefrontal	beef_overallfreq	IVW(MRE)	30	2.94211e-06	2.23678e-05	(0, 0)	0.9
SA_rostralmiddlefrontal	beef_overallfreq	MR Egger	30	-1.28061e-05	5.61093e-05	(0, 0)	0.82
SA_rostralmiddlefrontal	beef_overallfreq	Weighted median	30	1.07091e-05	2.9436e-05	(0, 0)	0.72
SA_rostralmiddlefrontal	beef_overallfreq	Simple mode	30	7.4728e-05	5.54014e-05	(0, 0)	0.19
SA_rostralmiddlefrontal	beef_overallfreq	Weighted mode	30	-1.10182e-05	4.79735e-05	(0, 0)	0.82
SA_superiorfrontal	beef_overallfreq	IVW(MRE)	23	1.06217e-05	1.80572e-05	(0, 0)	0.56
SA_superiorfrontal	beef_overallfreq	MR Egger	23	-6.26765e-05	5.76359e-05	(0, 0)	0.29
SA_superiorfrontal	beef_overallfreq	Weighted median	23	9.46362e-06	3.25085e-05	(0, 0)	0.77
SA_superiorfrontal	beef_overallfreq	Simple mode	23	-5.01645e-05	5.9896e-05	(0, 0)	0.41
SA_superiorfrontal	beef_overallfreq	Weighted mode	23	-4.79894e-05	5.7136e-05	(0, 0)	0.41
SA_superiorparietal	beef_overallfreq	IVW(MRE)	28	1.74553e-05	3.07858e-05	(0, 0)	0.57
SA_superiorparietal	beef_overallfreq	MR Egger	28	5.09332e-05	6.47484e-05	(0, 0)	0.44
SA_superiorparietal	beef_overallfreq	Weighted median	28	2.30995e-05	2.6737e-05	(0, 0)	0.39
SA_superiorparietal	beef_overallfreq	Simple mode	28	-3.11394e-06	4.5025e-05	(0, 0)	0.95
SA_superiorparietal	beef_overallfreq	Weighted mode	28	3.87994e-06	3.59273e-05	(0, 0)	0.91
SA_superiortemporal	beef_overallfreq	IVW(MRE)	22	2.61764e-05	4.79487e-05	(0, 0)	0.59
SA_superiortemporal	beef_overallfreq	MR Egger	22	-0.00014351	0.000140169	(0, 0)	0.32
SA_superiortemporal	beef_overallfreq	Weighted median	22	-1.59551e-05	5.68663e-05	(0, 0)	0.78
SA_superiortemporal	beef_overallfreq	Simple mode	22	-3.90198e-05	9.32084e-05	(0, 0)	0.68
SA_superiortemporal	beef_overallfreq	Weighted mode	22	-6.07544e-05	9.27739e-05	(0, 0)	0.52
SA_supramarginal	beef_overallfreq	IVW(MRE)	24	1.75095e-05	3.22051e-05	(0, 0)	0.59
SA_supramarginal	beef_overallfreq	MR Egger	24	2.4637e-05	7.69628e-05	(0, 0)	0.75
SA_supramarginal	beef_overallfreq	Weighted median	24	4.57722e-05	3.55497e-05	(0, 0)	0.2
SA_supramarginal	beef_overallfreq	Simple mode	24	3.48584e-05	5.46931e-05	(0, 0)	0.53
SA_supramarginal	beef_overallfreq	Weighted mode	24	4.26734e-05	4.3624e-05	(0, 0)	0.34
SA_temporalpole	beef_overallfreq	IVW(MRE)	15	0.000150179	0.000245622	(0, 0)	0.54
SA_temporalpole	beef_overallfreq	MR Egger	15	-0.000401247	0.000407143	(0, 0)	0.34
SA_temporalpole	beef_overallfreq	Weighted median	15	0.000361986	0.000330586	(0, 0)	0.27
SA_temporalpole	beef_overallfreq	Simple mode	15	0.000532947	0.000621118	(0, 0)	0.41
SA_temporalpole	beef_overallfreq	Weighted mode	15	0.000456746	0.000594834	(0, 0)	0.46
SA_transversetemporal	beef_overallfreq	IVW(MRE)	35	0.000302456	0.000172847	(0, 0)	0.08
SA_transversetemporal	beef_overallfreq	MR Egger	35	0.00115795	0.000386978	(0, 0)	0.0052
SA_transversetemporal	beef_overallfreq	Weighted median	35	0.000266863	0.0002229	(0, 0)	0.23
SA_transversetemporal	beef_overallfreq	Simple mode	35	0.000479983	0.000460292	(0, 0)	0.3
SA_transversetemporal	beef_overallfreq	Weighted mode	35	0.000479983	0.000417032	(0, 0)	0.26
THICK_bankssts	beef_overallfreq	IVW(MRE)	12	-0.0708343	0.115509	(-0.3, 0.16)	0.54
THICK_bankssts	beef_overallfreq	MR Egger	12	-0.340446	0.28618	(-0.9, 0.22)	0.26
THICK_bankssts	beef_overallfreq	Weighted median	12	-0.207345	0.147386	(-0.5, 0.08)	0.16
THICK_bankssts	beef_overallfreq	Simple mode	12	-0.315877	0.231571	(-0.77, 0.14)	0.2
THICK_bankssts	beef_overallfreq	Weighted mode	12	-0.3336	0.238351	(-0.8, 0.13)	0.19
THICK_caudalanteriorcingulate	beef_overallfreq	IVW(MRE)	10	-0.0319765	0.0871435	(-0.2, 0.14)	0.71
THICK_caudalanteriorcingulate	beef_overallfreq	MR Egger	10	-0.237273	0.159688	(-0.55, 0.08)	0.18
THICK_caudalanteriorcingulate	beef_overallfreq	Weighted median	10	-0.0268683	0.0867441	(-0.2, 0.14)	0.76
THICK_caudalanteriorcingulate	beef_overallfreq	Simple mode	10	0.135126	0.179223	(-0.22, 0.49)	0.47
THICK_caudalanteriorcingulate	beef_overallfreq	Weighted mode	10	-0.0679242	0.117486	(-0.3, 0.16)	0.58
THICK_caudalmiddlefrontal	beef_overallfreq	IVW(MRE)	12	0.00984236	0.182333	(-0.35, 0.37)	0.96
THICK_caudalmiddlefrontal	beef_overallfreq	MR Egger	12	0.0101767	0.455723	(-0.88, 0.9)	0.98
THICK_caudalmiddlefrontal	beef_overallfreq	Weighted median	12	-0.0680498	0.203718	(-0.47, 0.33)	0.74
THICK_caudalmiddlefrontal	beef_overallfreq	Simple mode	12	-0.072394	0.316742	(-0.69, 0.55)	0.82
THICK_caudalmiddlefrontal	beef_overallfreq	Weighted mode	12	-0.110498	0.305903	(-0.71, 0.49)	0.72
THICK_cuneus	beef_overallfreq	IVW(MRE)	8	-0.00734349	0.066995	(-0.14, 0.12)	0.91
THICK_cuneus	beef_overallfreq	MR Egger	8	0.192935	0.319195	(-0.43, 0.82)	0.57
THICK_cuneus	beef_overallfreq	Weighted median	8	0.000137997	0.18451	(-0.36, 0.36)	1
THICK_cuneus	beef_overallfreq	Simple mode	8	0.15613	0.251691	(-0.34, 0.65)	0.55
THICK_cuneus	beef_overallfreq	Weighted mode	8	-0.148676	0.279248	(-0.7, 0.4)	0.61
THICK_entorhinal	beef_overallfreq	IVW(MRE)	9	-0.0104505	0.0753462	(-0.16, 0.14)	0.89
THICK_entorhinal	beef_overallfreq	MR Egger	9	-0.582112	0.189765	(-0.95, -0.21)	0.018
THICK_entorhinal	beef_overallfreq	Weighted median	9	0.0117554	0.0775119	(-0.14, 0.16)	0.88
THICK_entorhinal	beef_overallfreq	Simple mode	9	0.00500303	0.122881	(-0.24, 0.25)	0.97
THICK_entorhinal	beef_overallfreq	Weighted mode	9	0.022938	0.132126	(-0.24, 0.28)	0.87
THICK_frontalpole	beef_overallfreq	IVW(MRE)	12	-0.0836626	0.0698667	(-0.22, 0.05)	0.23
THICK_frontalpole	beef_overallfreq	MR Egger	12	0.161334	0.1351	(-0.1, 0.43)	0.26
THICK_frontalpole	beef_overallfreq	Weighted median	12	-0.018365	0.0776884	(-0.17, 0.13)	0.81
THICK_frontalpole	beef_overallfreq	Simple mode	12	-0.0450345	0.148405	(-0.34, 0.25)	0.77
THICK_frontalpole	beef_overallfreq	Weighted mode	12	0.0254447	0.114756	(-0.2, 0.25)	0.83
THICK_fusiform	beef_overallfreq	IVW(MRE)	8	0.0897738	0.146364	(-0.2, 0.38)	0.54
THICK_fusiform	beef_overallfreq	MR Egger	8	0.180144	0.347515	(-0.5, 0.86)	0.62
THICK_fusiform	beef_overallfreq	Weighted median	8	-0.0241344	0.203311	(-0.42, 0.37)	0.91
THICK_fusiform	beef_overallfreq	Simple mode	8	0.441232	0.336672	(-0.22, 1.1)	0.23
THICK_fusiform	beef_overallfreq	Weighted mode	8	-0.159288	0.338667	(-0.82, 0.5)	0.65
THICK_inferiorparietal	beef_overallfreq	IVW(MRE)	13	0.156741	0.167614	(-0.17, 0.49)	0.35
THICK_inferiorparietal	beef_overallfreq	MR Egger	13	-0.559915	0.384207	(-1.31, 0.19)	0.17
THICK_inferiorparietal	beef_overallfreq	Weighted median	13	-0.04751	0.227628	(-0.49, 0.4)	0.83
THICK_inferiorparietal	beef_overallfreq	Simple mode	13	-0.196111	0.371677	(-0.92, 0.53)	0.61
THICK_inferiorparietal	beef_overallfreq	Weighted mode	13	-0.179955	0.337969	(-0.84, 0.48)	0.6
THICK_inferiortemporal	beef_overallfreq	IVW(MRE)	18	0.0316292	0.128086	(-0.22, 0.28)	0.8
THICK_inferiortemporal	beef_overallfreq	MR Egger	18	-0.065537	0.247873	(-0.55, 0.42)	0.79
THICK_inferiortemporal	beef_overallfreq	Weighted median	18	0.0751721	0.136948	(-0.19, 0.34)	0.58
THICK_inferiortemporal	beef_overallfreq	Simple mode	18	0.162251	0.29859	(-0.42, 0.75)	0.59
THICK_inferiortemporal	beef_overallfreq	Weighted mode	18	0.169637	0.252215	(-0.32, 0.66)	0.51
THICK_insula	beef_overallfreq	IVW(MRE)	14	-0.0681285	0.111321	(-0.29, 0.15)	0.54
THICK_insula	beef_overallfreq	MR Egger	14	0.24876	0.285711	(-0.31, 0.81)	0.4
THICK_insula	beef_overallfreq	Weighted median	14	0.0784872	0.14654	(-0.21, 0.37)	0.59
THICK_insula	beef_overallfreq	Simple mode	14	0.100849	0.295918	(-0.48, 0.68)	0.74
THICK_insula	beef_overallfreq	Weighted mode	14	0.143079	0.276966	(-0.4, 0.69)	0.61
THICK_isthmuscingulate	beef_overallfreq	IVW(MRE)	28	0.0683819	0.0502046	(-0.03, 0.17)	0.17
THICK_isthmuscingulate	beef_overallfreq	MR Egger	28	0.00930765	0.120756	(-0.23, 0.25)	0.94
THICK_isthmuscingulate	beef_overallfreq	Weighted median	28	0.0357697	0.0711076	(-0.1, 0.18)	0.61
THICK_isthmuscingulate	beef_overallfreq	Simple mode	28	-0.019603	0.149317	(-0.31, 0.27)	0.9
THICK_isthmuscingulate	beef_overallfreq	Weighted mode	28	-0.015544	0.150857	(-0.31, 0.28)	0.92
THICK_lateraloccipital	beef_overallfreq	IVW(MRE)	13	0.0117411	0.113278	(-0.21, 0.23)	0.92
THICK_lateraloccipital	beef_overallfreq	MR Egger	13	-0.247585	0.278122	(-0.79, 0.3)	0.39
THICK_lateraloccipital	beef_overallfreq	Weighted median	13	-0.0447151	0.182066	(-0.4, 0.31)	0.81
THICK_lateraloccipital	beef_overallfreq	Simple mode	13	-0.0556603	0.292365	(-0.63, 0.52)	0.85
THICK_lateraloccipital	beef_overallfreq	Weighted mode	13	-0.0657633	0.271035	(-0.6, 0.47)	0.81
THICK_lateralorbitofrontal	beef_overallfreq	IVW(MRE)	7	-0.00147184	0.0951059	(-0.19, 0.18)	0.99
THICK_lateralorbitofrontal	beef_overallfreq	MR Egger	7	0.136315	0.219271	(-0.29, 0.57)	0.56
THICK_lateralorbitofrontal	beef_overallfreq	Weighted median	7	0.0906809	0.170652	(-0.24, 0.43)	0.6
THICK_lateralorbitofrontal	beef_overallfreq	Simple mode	7	0.0762297	0.25276	(-0.42, 0.57)	0.77
THICK_lateralorbitofrontal	beef_overallfreq	Weighted mode	7	0.142812	0.195022	(-0.24, 0.53)	0.49
THICK_lingual	beef_overallfreq	IVW(MRE)	14	0.156546	0.202596	(-0.24, 0.55)	0.44
THICK_lingual	beef_overallfreq	MR Egger	14	0.347286	0.571058	(-0.77, 1.47)	0.55
THICK_lingual	beef_overallfreq	Weighted median	14	0.308834	0.185033	(-0.05, 0.67)	0.1
THICK_lingual	beef_overallfreq	Simple mode	14	0.618047	0.296484	(0.04, 1.2)	0.06
THICK_lingual	beef_overallfreq	Weighted mode	14	0.589646	0.304448	(-0.01, 1.19)	0.07
THICK_medialorbitofrontal	beef_overallfreq	IVW(MRE)	14	-0.0199411	0.0819071	(-0.18, 0.14)	0.81
THICK_medialorbitofrontal	beef_overallfreq	MR Egger	14	-0.24289	0.230471	(-0.69, 0.21)	0.31
THICK_medialorbitofrontal	beef_overallfreq	Weighted median	14	0.00132488	0.110025	(-0.21, 0.22)	0.99
THICK_medialorbitofrontal	beef_overallfreq	Simple mode	14	-0.00784795	0.184391	(-0.37, 0.35)	0.97
THICK_medialorbitofrontal	beef_overallfreq	Weighted mode	14	0.000667434	0.164445	(-0.32, 0.32)	1
THICK_middletemporal	beef_overallfreq	IVW(MRE)	10	0.248092	0.15375	(-0.05, 0.55)	0.11
THICK_middletemporal	beef_overallfreq	MR Egger	10	0.00493025	0.351304	(-0.68, 0.69)	0.99
THICK_middletemporal	beef_overallfreq	Weighted median	10	0.154002	0.180231	(-0.2, 0.51)	0.39
THICK_middletemporal	beef_overallfreq	Simple mode	10	0.108373	0.329965	(-0.54, 0.76)	0.75
THICK_middletemporal	beef_overallfreq	Weighted mode	10	0.0780661	0.315812	(-0.54, 0.7)	0.81
THICK_paracentral	beef_overallfreq	IVW(MRE)	14	0.0769225	0.167394	(-0.25, 0.41)	0.65
THICK_paracentral	beef_overallfreq	MR Egger	14	0.0282796	0.370403	(-0.7, 0.75)	0.94
THICK_paracentral	beef_overallfreq	Weighted median	14	-0.0874934	0.153996	(-0.39, 0.21)	0.57
THICK_paracentral	beef_overallfreq	Simple mode	14	-0.131417	0.214235	(-0.55, 0.29)	0.55
THICK_paracentral	beef_overallfreq	Weighted mode	14	-0.0998374	0.19758	(-0.49, 0.29)	0.62
THICK_parahippocampal	beef_overallfreq	IVW(MRE)	26	0.017332	0.0454907	(-0.07, 0.11)	0.7
THICK_parahippocampal	beef_overallfreq	MR Egger	26	0.140067	0.101885	(-0.06, 0.34)	0.18
THICK_parahippocampal	beef_overallfreq	Weighted median	26	-0.00224526	0.047726	(-0.1, 0.09)	0.96
THICK_parahippocampal	beef_overallfreq	Simple mode	26	0.00946797	0.0918818	(-0.17, 0.19)	0.92
THICK_parahippocampal	beef_overallfreq	Weighted mode	26	-0.00094726	0.0861333	(-0.17, 0.17)	0.99
THICK_parsopercularis	beef_overallfreq	IVW(MRE)	16	0.067618	0.118302	(-0.16, 0.3)	0.57
THICK_parsopercularis	beef_overallfreq	MR Egger	16	0.103617	0.313488	(-0.51, 0.72)	0.75
THICK_parsopercularis	beef_overallfreq	Weighted median	16	-0.0561386	0.171578	(-0.39, 0.28)	0.74
THICK_parsopercularis	beef_overallfreq	Simple mode	16	-0.221924	0.33513	(-0.88, 0.43)	0.52
THICK_parsopercularis	beef_overallfreq	Weighted mode	16	0.438412	0.386947	(-0.32, 1.2)	0.27
THICK_parsorbitalis	beef_overallfreq	IVW(MRE)	12	0.0238118	0.08107	(-0.14, 0.18)	0.77
THICK_parsorbitalis	beef_overallfreq	MR Egger	12	-0.00148555	0.169789	(-0.33, 0.33)	0.99
THICK_parsorbitalis	beef_overallfreq	Weighted median	12	-0.0353048	0.108719	(-0.25, 0.18)	0.75
THICK_parsorbitalis	beef_overallfreq	Simple mode	12	-0.059525	0.165612	(-0.38, 0.27)	0.73
THICK_parsorbitalis	beef_overallfreq	Weighted mode	12	-0.0378953	0.138952	(-0.31, 0.23)	0.79
THICK_parstriangularis	beef_overallfreq	IVW(MRE)	18	0.0191928	0.117821	(-0.21, 0.25)	0.87
THICK_parstriangularis	beef_overallfreq	MR Egger	18	-0.103893	0.267158	(-0.63, 0.42)	0.7
THICK_parstriangularis	beef_overallfreq	Weighted median	18	-0.0180682	0.147799	(-0.31, 0.27)	0.9
THICK_parstriangularis	beef_overallfreq	Simple mode	18	0.00701669	0.261748	(-0.51, 0.52)	0.98
THICK_parstriangularis	beef_overallfreq	Weighted mode	18	0.0124298	0.244464	(-0.47, 0.49)	0.96
THICK_pericalcarine	beef_overallfreq	IVW(MRE)	18	-0.0287559	0.144003	(-0.31, 0.25)	0.84
THICK_pericalcarine	beef_overallfreq	MR Egger	18	0.0919278	0.42582	(-0.74, 0.93)	0.83
THICK_pericalcarine	beef_overallfreq	Weighted median	18	-0.218753	0.141656	(-0.5, 0.06)	0.12
THICK_pericalcarine	beef_overallfreq	Simple mode	18	-0.312294	0.2522	(-0.81, 0.18)	0.23
THICK_pericalcarine	beef_overallfreq	Weighted mode	18	-0.274979	0.235226	(-0.74, 0.19)	0.26
THICK_postcentral	beef_overallfreq	IVW(MRE)	24	-0.217715	0.105099	(-0.42, -0.01)	0.038
THICK_postcentral	beef_overallfreq	MR Egger	24	-0.159416	0.206462	(-0.56, 0.25)	0.45
THICK_postcentral	beef_overallfreq	Weighted median	24	-0.116837	0.136742	(-0.38, 0.15)	0.39
THICK_postcentral	beef_overallfreq	Simple mode	24	-0.202149	0.262645	(-0.72, 0.31)	0.45
THICK_postcentral	beef_overallfreq	Weighted mode	24	-0.150494	0.136591	(-0.42, 0.12)	0.28
THICK_posteriorcingulate	beef_overallfreq	IVW(MRE)	13	0.145592	0.0959688	(-0.04, 0.33)	0.13
THICK_posteriorcingulate	beef_overallfreq	MR Egger	13	0.33821	0.373632	(-0.39, 1.07)	0.38
THICK_posteriorcingulate	beef_overallfreq	Weighted median	13	0.0798302	0.149915	(-0.21, 0.37)	0.59
THICK_posteriorcingulate	beef_overallfreq	Simple mode	13	-0.0292856	0.250809	(-0.52, 0.46)	0.91
THICK_posteriorcingulate	beef_overallfreq	Weighted mode	13	-0.0157775	0.249245	(-0.5, 0.47)	0.95
THICK_precentral	beef_overallfreq	IVW(MRE)	14	-0.0703171	0.124626	(-0.31, 0.17)	0.57
THICK_precentral	beef_overallfreq	MR Egger	14	0.119678	0.348751	(-0.56, 0.8)	0.74
THICK_precentral	beef_overallfreq	Weighted median	14	-0.233224	0.176466	(-0.58, 0.11)	0.19
THICK_precentral	beef_overallfreq	Simple mode	14	-0.323132	0.326885	(-0.96, 0.32)	0.34
THICK_precentral	beef_overallfreq	Weighted mode	14	-0.354223	0.384241	(-1.11, 0.4)	0.37
THICK_precuneus	beef_overallfreq	IVW(MRE)	20	-0.0545272	0.146212	(-0.34, 0.23)	0.71
THICK_precuneus	beef_overallfreq	MR Egger	20	-0.484421	0.339999	(-1.15, 0.18)	0.17
THICK_precuneus	beef_overallfreq	Weighted median	20	-0.120356	0.19108	(-0.49, 0.25)	0.53
THICK_precuneus	beef_overallfreq	Simple mode	20	-0.171887	0.34205	(-0.84, 0.5)	0.62
THICK_precuneus	beef_overallfreq	Weighted mode	20	-0.171887	0.297855	(-0.76, 0.41)	0.57
THICK_rostralanteriorcingulate	beef_overallfreq	IVW(MRE)	23	-0.0653923	0.0479703	(-0.16, 0.03)	0.17
THICK_rostralanteriorcingulate	beef_overallfreq	MR Egger	23	-0.252831	0.126031	(-0.5, -0.01)	0.06
THICK_rostralanteriorcingulate	beef_overallfreq	Weighted median	23	-0.118669	0.0703009	(-0.26, 0.02)	0.09
THICK_rostralanteriorcingulate	beef_overallfreq	Simple mode	23	-0.205465	0.134962	(-0.47, 0.06)	0.14
THICK_rostralanteriorcingulate	beef_overallfreq	Weighted mode	23	-0.192533	0.133793	(-0.45, 0.07)	0.16
THICK_rostralmiddlefrontal	beef_overallfreq	IVW(MRE)	14	-0.143066	0.213926	(-0.56, 0.28)	0.5
THICK_rostralmiddlefrontal	beef_overallfreq	MR Egger	14	0.122282	0.621168	(-1.1, 1.34)	0.85
THICK_rostralmiddlefrontal	beef_overallfreq	Weighted median	14	-0.231953	0.211189	(-0.65, 0.18)	0.27
THICK_rostralmiddlefrontal	beef_overallfreq	Simple mode	14	-0.231569	0.359283	(-0.94, 0.47)	0.53
THICK_rostralmiddlefrontal	beef_overallfreq	Weighted mode	14	-0.251951	0.316962	(-0.87, 0.37)	0.44
THICK_superiorfrontal	beef_overallfreq	IVW(MRE)	22	-0.180345	0.174124	(-0.52, 0.16)	0.3
THICK_superiorfrontal	beef_overallfreq	MR Egger	22	0.22088	0.407426	(-0.58, 1.02)	0.59
THICK_superiorfrontal	beef_overallfreq	Weighted median	22	-0.02516	0.188708	(-0.4, 0.34)	0.89
THICK_superiorfrontal	beef_overallfreq	Simple mode	22	-0.806946	0.454593	(-1.7, 0.08)	0.09
THICK_superiorfrontal	beef_overallfreq	Weighted mode	22	0.228276	0.356909	(-0.47, 0.93)	0.53
THICK_superiorparietal	beef_overallfreq	IVW(MRE)	14	0.126628	0.193844	(-0.25, 0.51)	0.51
THICK_superiorparietal	beef_overallfreq	MR Egger	14	0.139154	0.555783	(-0.95, 1.23)	0.81
THICK_superiorparietal	beef_overallfreq	Weighted median	14	0.261353	0.197128	(-0.13, 0.65)	0.18
THICK_superiorparietal	beef_overallfreq	Simple mode	14	0.288096	0.286578	(-0.27, 0.85)	0.33
THICK_superiorparietal	beef_overallfreq	Weighted mode	14	0.327964	0.263155	(-0.19, 0.84)	0.23
THICK_superiortemporal	beef_overallfreq	IVW(MRE)	11	-0.0665929	0.146409	(-0.35, 0.22)	0.65
THICK_superiortemporal	beef_overallfreq	MR Egger	11	0.00633401	0.315533	(-0.61, 0.62)	0.98
THICK_superiortemporal	beef_overallfreq	Weighted median	11	0.0369839	0.184042	(-0.32, 0.4)	0.84
THICK_superiortemporal	beef_overallfreq	Simple mode	11	0.132069	0.298856	(-0.45, 0.72)	0.67
THICK_superiortemporal	beef_overallfreq	Weighted mode	11	0.0603332	0.26979	(-0.47, 0.59)	0.83
THICK_supramarginal	beef_overallfreq	IVW(MRE)	20	-0.0302796	0.138299	(-0.3, 0.24)	0.83
THICK_supramarginal	beef_overallfreq	MR Egger	20	-0.412839	0.348938	(-1.1, 0.27)	0.25
THICK_supramarginal	beef_overallfreq	Weighted median	20	0.0872513	0.186685	(-0.28, 0.45)	0.64
THICK_supramarginal	beef_overallfreq	Simple mode	20	0.294019	0.348783	(-0.39, 0.98)	0.41
THICK_supramarginal	beef_overallfreq	Weighted mode	20	0.22498	0.35446	(-0.47, 0.92)	0.53
THICK_temporalpole	beef_overallfreq	IVW(MRE)	6	-0.0145309	0.13599	(-0.28, 0.25)	0.91
THICK_temporalpole	beef_overallfreq	MR Egger	6	0.137641	0.228386	(-0.31, 0.59)	0.58
THICK_temporalpole	beef_overallfreq	Weighted median	6	0.00456365	0.11994	(-0.23, 0.24)	0.97
THICK_temporalpole	beef_overallfreq	Simple mode	6	0.0650044	0.217964	(-0.36, 0.49)	0.78
THICK_temporalpole	beef_overallfreq	Weighted mode	6	0.149652	0.162521	(-0.17, 0.47)	0.4
THICK_transversetemporal	beef_overallfreq	IVW(MRE)	12	0.0403613	0.0891964	(-0.13, 0.22)	0.65
THICK_transversetemporal	beef_overallfreq	MR Egger	12	0.146545	0.22423	(-0.29, 0.59)	0.53
THICK_transversetemporal	beef_overallfreq	Weighted median	12	0.0876477	0.106146	(-0.12, 0.3)	0.41
THICK_transversetemporal	beef_overallfreq	Simple mode	12	0.099307	0.152224	(-0.2, 0.4)	0.53
THICK_transversetemporal	beef_overallfreq	Weighted mode	12	0.107666	0.156777	(-0.2, 0.41)	0.51
SA_bankssts	cereal_bowlsperweek	IVW(MRE)	19	-0.000194486	0.000105935	(0, 0)	0.07
SA_bankssts	cereal_bowlsperweek	MR Egger	19	-0.000171746	0.00036409	(0, 0)	0.64
SA_bankssts	cereal_bowlsperweek	Weighted median	19	-0.000118236	0.000135305	(0, 0)	0.38
SA_bankssts	cereal_bowlsperweek	Simple mode	19	-0.000133265	0.00024698	(0, 0)	0.6
SA_bankssts	cereal_bowlsperweek	Weighted mode	19	-0.000164303	0.000225366	(0, 0)	0.48
SA_caudalanteriorcingulate	cereal_bowlsperweek	IVW(MRE)	15	-0.00013651	0.000112025	(0, 0)	0.22
SA_caudalanteriorcingulate	cereal_bowlsperweek	MR Egger	15	0.000340399	0.000361318	(0, 0)	0.36
SA_caudalanteriorcingulate	cereal_bowlsperweek	Weighted median	15	-0.000122306	0.000164829	(0, 0)	0.46
SA_caudalanteriorcingulate	cereal_bowlsperweek	Simple mode	15	-0.000123982	0.000309333	(0, 0)	0.69
SA_caudalanteriorcingulate	cereal_bowlsperweek	Weighted mode	15	-0.000140078	0.000284292	(0, 0)	0.63
SA_caudalmiddlefrontal	cereal_bowlsperweek	IVW(MRE)	28	3.56599e-05	4.75266e-05	(0, 0)	0.45
SA_caudalmiddlefrontal	cereal_bowlsperweek	MR Egger	28	-0.000243806	0.000123996	(0, 0)	0.06
SA_caudalmiddlefrontal	cereal_bowlsperweek	Weighted median	28	3.13208e-05	4.80942e-05	(0, 0)	0.51
SA_caudalmiddlefrontal	cereal_bowlsperweek	Simple mode	28	8.64415e-05	0.000118795	(0, 0)	0.47
SA_caudalmiddlefrontal	cereal_bowlsperweek	Weighted mode	28	-9.43978e-05	0.000117478	(0, 0)	0.43
SA_cuneus	cereal_bowlsperweek	IVW(MRE)	23	-8.96613e-05	6.22562e-05	(0, 0)	0.15
SA_cuneus	cereal_bowlsperweek	MR Egger	23	-0.000363334	0.000212317	(0, 0)	0.1
SA_cuneus	cereal_bowlsperweek	Weighted median	23	-6.83914e-05	9.06932e-05	(0, 0)	0.45
SA_cuneus	cereal_bowlsperweek	Simple mode	23	0.000135237	0.000178148	(0, 0)	0.46
SA_cuneus	cereal_bowlsperweek	Weighted mode	23	0.000127524	0.000174112	(0, 0)	0.47
SA_entorhinal	cereal_bowlsperweek	IVW(MRE)	15	-2.43449e-05	0.000262899	(0, 0)	0.93
SA_entorhinal	cereal_bowlsperweek	MR Egger	15	0.000748539	0.0010448	(0, 0)	0.49
SA_entorhinal	cereal_bowlsperweek	Weighted median	15	-0.000475068	0.000295344	(0, 0)	0.11
SA_entorhinal	cereal_bowlsperweek	Simple mode	15	-0.000644431	0.000579667	(0, 0)	0.28
SA_entorhinal	cereal_bowlsperweek	Weighted mode	15	-0.000669649	0.000585875	(0, 0)	0.27
SA_frontalpole	cereal_bowlsperweek	IVW(MRE)	11	0.000469577	0.000390727	(0, 0)	0.23
SA_frontalpole	cereal_bowlsperweek	MR Egger	11	0.00187001	0.000869263	(0, 0)	0.06
SA_frontalpole	cereal_bowlsperweek	Weighted median	11	0.000739011	0.000588831	(0, 0)	0.21
SA_frontalpole	cereal_bowlsperweek	Simple mode	11	0.00125103	0.000967151	(0, 0)	0.22
SA_frontalpole	cereal_bowlsperweek	Weighted mode	11	0.00125103	0.000871824	(0, 0)	0.18
SA_fusiform	cereal_bowlsperweek	IVW(MRE)	19	-0.000108154	6.54406e-05	(0, 0)	0.1
SA_fusiform	cereal_bowlsperweek	MR Egger	19	-0.000191283	0.000185842	(0, 0)	0.32
SA_fusiform	cereal_bowlsperweek	Weighted median	19	1.44773e-05	6.55187e-05	(0, 0)	0.83
SA_fusiform	cereal_bowlsperweek	Simple mode	19	3.88653e-05	0.000119062	(0, 0)	0.75
SA_fusiform	cereal_bowlsperweek	Weighted mode	19	5.26562e-05	0.000103792	(0, 0)	0.62
SA_inferiorparietal	cereal_bowlsperweek	IVW(MRE)	31	1.95994e-06	2.20974e-05	(0, 0)	0.93
SA_inferiorparietal	cereal_bowlsperweek	MR Egger	31	-4.93138e-05	5.73561e-05	(0, 0)	0.4
SA_inferiorparietal	cereal_bowlsperweek	Weighted median	31	-6.0669e-07	2.5568e-05	(0, 0)	0.98
SA_inferiorparietal	cereal_bowlsperweek	Simple mode	31	2.95647e-05	5.62689e-05	(0, 0)	0.6
SA_inferiorparietal	cereal_bowlsperweek	Weighted mode	31	-1.30355e-05	4.76616e-05	(0, 0)	0.79
SA_inferiortemporal	cereal_bowlsperweek	IVW(MRE)	27	-2.36855e-05	4.21721e-05	(0, 0)	0.57
SA_inferiortemporal	cereal_bowlsperweek	MR Egger	27	9.2419e-05	0.000129382	(0, 0)	0.48
SA_inferiortemporal	cereal_bowlsperweek	Weighted median	27	-2.6773e-05	4.4022e-05	(0, 0)	0.54
SA_inferiortemporal	cereal_bowlsperweek	Simple mode	27	-3.78176e-05	9.13385e-05	(0, 0)	0.68
SA_inferiortemporal	cereal_bowlsperweek	Weighted mode	27	-3.18896e-05	9.18704e-05	(0, 0)	0.73
SA_insula	cereal_bowlsperweek	IVW(MRE)	29	0.000158696	7.09374e-05	(0, 0)	0.025
SA_insula	cereal_bowlsperweek	MR Egger	29	4.39114e-05	0.0001708	(0, 0)	0.8
SA_insula	cereal_bowlsperweek	Weighted median	29	0.000159379	7.65295e-05	(0, 0)	0.037
SA_insula	cereal_bowlsperweek	Simple mode	29	0.000231313	0.000138826	(0, 0)	0.11
SA_insula	cereal_bowlsperweek	Weighted mode	29	0.00018243	0.000133981	(0, 0)	0.18
SA_isthmuscingulate	cereal_bowlsperweek	IVW(MRE)	20	-7.23314e-05	8.69467e-05	(0, 0)	0.41
SA_isthmuscingulate	cereal_bowlsperweek	MR Egger	20	-8.79953e-05	0.000238533	(0, 0)	0.72
SA_isthmuscingulate	cereal_bowlsperweek	Weighted median	20	-8.66605e-05	0.000122974	(0, 0)	0.48
SA_isthmuscingulate	cereal_bowlsperweek	Simple mode	20	-0.000266901	0.000238333	(0, 0)	0.28
SA_isthmuscingulate	cereal_bowlsperweek	Weighted mode	20	-0.000257369	0.000232841	(0, 0)	0.28
SA_lateraloccipital	cereal_bowlsperweek	IVW(MRE)	20	-5.33241e-06	4.96674e-05	(0, 0)	0.91
SA_lateraloccipital	cereal_bowlsperweek	MR Egger	20	2.15557e-05	0.000216673	(0, 0)	0.92
SA_lateraloccipital	cereal_bowlsperweek	Weighted median	20	-3.34692e-05	4.02158e-05	(0, 0)	0.41
SA_lateraloccipital	cereal_bowlsperweek	Simple mode	20	1.08183e-06	7.07038e-05	(0, 0)	0.99
SA_lateraloccipital	cereal_bowlsperweek	Weighted mode	20	-3.19278e-05	6.1627e-05	(0, 0)	0.61
SA_lateralorbitofrontal	cereal_bowlsperweek	IVW(MRE)	24	-2.15046e-05	5.2142e-05	(0, 0)	0.68
SA_lateralorbitofrontal	cereal_bowlsperweek	MR Egger	24	-0.000259917	0.000200401	(0, 0)	0.21
SA_lateralorbitofrontal	cereal_bowlsperweek	Weighted median	24	2.16163e-05	6.69723e-05	(0, 0)	0.75
SA_lateralorbitofrontal	cereal_bowlsperweek	Simple mode	24	8.55231e-05	0.000122272	(0, 0)	0.49
SA_lateralorbitofrontal	cereal_bowlsperweek	Weighted mode	24	8.18443e-05	0.000108515	(0, 0)	0.46
SA_lingual	cereal_bowlsperweek	IVW(MRE)	39	-2.47764e-05	3.02687e-05	(0, 0)	0.41
SA_lingual	cereal_bowlsperweek	MR Egger	39	0.000168586	8.25119e-05	(0, 0)	0.048
SA_lingual	cereal_bowlsperweek	Weighted median	39	4.58121e-06	3.44677e-05	(0, 0)	0.89
SA_lingual	cereal_bowlsperweek	Simple mode	39	2.11495e-05	7.59138e-05	(0, 0)	0.78
SA_lingual	cereal_bowlsperweek	Weighted mode	39	1.35506e-05	7.6274e-05	(0, 0)	0.86
SA_medialorbitofrontal	cereal_bowlsperweek	IVW(MRE)	10	0.000107462	0.000126975	(0, 0)	0.4
SA_medialorbitofrontal	cereal_bowlsperweek	MR Egger	10	7.98943e-05	0.000363099	(0, 0)	0.83
SA_medialorbitofrontal	cereal_bowlsperweek	Weighted median	10	0.000192444	0.000137003	(0, 0)	0.16
SA_medialorbitofrontal	cereal_bowlsperweek	Simple mode	10	0.000247135	0.000223591	(0, 0)	0.3
SA_medialorbitofrontal	cereal_bowlsperweek	Weighted mode	10	0.000247135	0.000182389	(0, 0)	0.21
SA_middletemporal	cereal_bowlsperweek	IVW(MRE)	22	1.85673e-05	4.10799e-05	(0, 0)	0.65
SA_middletemporal	cereal_bowlsperweek	MR Egger	22	6.42053e-05	0.000127898	(0, 0)	0.62
SA_middletemporal	cereal_bowlsperweek	Weighted median	22	1.10832e-05	5.42433e-05	(0, 0)	0.84
SA_middletemporal	cereal_bowlsperweek	Simple mode	22	6.26654e-05	0.000109978	(0, 0)	0.57
SA_middletemporal	cereal_bowlsperweek	Weighted mode	22	2.58602e-05	9.82292e-05	(0, 0)	0.79
SA_paracentral	cereal_bowlsperweek	IVW(MRE)	26	9.74342e-07	5.53074e-05	(0, 0)	0.99
SA_paracentral	cereal_bowlsperweek	MR Egger	26	4.89936e-05	0.000119046	(0, 0)	0.68
SA_paracentral	cereal_bowlsperweek	Weighted median	26	5.95064e-05	8.02279e-05	(0, 0)	0.46
SA_paracentral	cereal_bowlsperweek	Simple mode	26	0.000146875	0.000151826	(0, 0)	0.34
SA_paracentral	cereal_bowlsperweek	Weighted mode	26	0.000185131	0.000135248	(0, 0)	0.18
SA_parahippocampal	cereal_bowlsperweek	IVW(MRE)	15	-3.95382e-05	0.000195942	(0, 0)	0.84
SA_parahippocampal	cereal_bowlsperweek	MR Egger	15	0.00032113	0.000417314	(0, 0)	0.46
SA_parahippocampal	cereal_bowlsperweek	Weighted median	15	-0.000149169	0.000199568	(0, 0)	0.45
SA_parahippocampal	cereal_bowlsperweek	Simple mode	15	-0.000229328	0.000391413	(0, 0)	0.57
SA_parahippocampal	cereal_bowlsperweek	Weighted mode	15	-1.16359e-05	0.000356478	(0, 0)	0.97
SA_parsopercularis	cereal_bowlsperweek	IVW(MRE)	20	3.68429e-05	6.60205e-05	(0, 0)	0.58
SA_parsopercularis	cereal_bowlsperweek	MR Egger	20	3.21958e-05	0.000139255	(0, 0)	0.82
SA_parsopercularis	cereal_bowlsperweek	Weighted median	20	-1.06516e-05	7.38627e-05	(0, 0)	0.89
SA_parsopercularis	cereal_bowlsperweek	Simple mode	20	-4.64439e-05	0.000134099	(0, 0)	0.73
SA_parsopercularis	cereal_bowlsperweek	Weighted mode	20	-5.47375e-05	0.000125004	(0, 0)	0.67
SA_parsorbitalis	cereal_bowlsperweek	IVW(MRE)	12	9.70572e-06	0.000270063	(0, 0)	0.97
SA_parsorbitalis	cereal_bowlsperweek	MR Egger	12	0.00149992	0.000973076	(0, 0)	0.15
SA_parsorbitalis	cereal_bowlsperweek	Weighted median	12	9.33448e-05	0.000303212	(0, 0)	0.76
SA_parsorbitalis	cereal_bowlsperweek	Simple mode	12	0.000304437	0.000574136	(0, 0)	0.61
SA_parsorbitalis	cereal_bowlsperweek	Weighted mode	12	0.000122249	0.00055084	(0, 0)	0.83
SA_parstriangularis	cereal_bowlsperweek	IVW(MRE)	27	0.000100569	6.21574e-05	(0, 0)	0.11
SA_parstriangularis	cereal_bowlsperweek	MR Egger	27	0.000162537	0.000148176	(0, 0)	0.28
SA_parstriangularis	cereal_bowlsperweek	Weighted median	27	0.000147528	7.33868e-05	(0, 0)	0.044
SA_parstriangularis	cereal_bowlsperweek	Simple mode	27	0.000237611	0.00017807	(0, 0)	0.19
SA_parstriangularis	cereal_bowlsperweek	Weighted mode	27	0.000237611	0.000153216	(0, 0)	0.13
SA_pericalcarine	cereal_bowlsperweek	IVW(MRE)	39	-5.31096e-05	3.82619e-05	(0, 0)	0.17
SA_pericalcarine	cereal_bowlsperweek	MR Egger	39	4.62738e-05	0.000117549	(0, 0)	0.7
SA_pericalcarine	cereal_bowlsperweek	Weighted median	39	3.31265e-06	4.7137e-05	(0, 0)	0.94
SA_pericalcarine	cereal_bowlsperweek	Simple mode	39	4.98524e-05	0.000101578	(0, 0)	0.63
SA_pericalcarine	cereal_bowlsperweek	Weighted mode	39	4.98524e-05	9.36627e-05	(0, 0)	0.6
SA_postcentral	cereal_bowlsperweek	IVW(MRE)	21	-6.0745e-05	4.43289e-05	(0, 0)	0.17
SA_postcentral	cereal_bowlsperweek	MR Egger	21	-0.000126666	0.000105051	(0, 0)	0.24
SA_postcentral	cereal_bowlsperweek	Weighted median	21	-8.71504e-05	5.06969e-05	(0, 0)	0.09
SA_postcentral	cereal_bowlsperweek	Simple mode	21	-6.18351e-05	0.000100074	(0, 0)	0.54
SA_postcentral	cereal_bowlsperweek	Weighted mode	21	-9.68542e-05	6.50046e-05	(0, 0)	0.15
SA_posteriorcingulate	cereal_bowlsperweek	IVW(MRE)	24	-7.09288e-05	0.000107465	(0, 0)	0.51
SA_posteriorcingulate	cereal_bowlsperweek	MR Egger	24	-4.41956e-05	0.00033713	(0, 0)	0.9
SA_posteriorcingulate	cereal_bowlsperweek	Weighted median	24	5.04486e-06	0.000127036	(0, 0)	0.97
SA_posteriorcingulate	cereal_bowlsperweek	Simple mode	24	3.64822e-05	0.000290758	(0, 0)	0.9
SA_posteriorcingulate	cereal_bowlsperweek	Weighted mode	24	6.41793e-05	0.00025349	(0, 0)	0.8
SA_precentral	cereal_bowlsperweek	IVW(MRE)	25	-4.65453e-06	2.98819e-05	(0, 0)	0.88
SA_precentral	cereal_bowlsperweek	MR Egger	25	-2.68304e-05	4.94973e-05	(0, 0)	0.59
SA_precentral	cereal_bowlsperweek	Weighted median	25	-3.94213e-05	2.93552e-05	(0, 0)	0.18
SA_precentral	cereal_bowlsperweek	Simple mode	25	0.000112873	7.86825e-05	(0, 0)	0.16
SA_precentral	cereal_bowlsperweek	Weighted mode	25	-4.01415e-05	2.87637e-05	(0, 0)	0.18
SA_precuneus	cereal_bowlsperweek	IVW(MRE)	31	-2.95412e-06	3.26753e-05	(0, 0)	0.93
SA_precuneus	cereal_bowlsperweek	MR Egger	31	4.21262e-05	7.84808e-05	(0, 0)	0.6
SA_precuneus	cereal_bowlsperweek	Weighted median	31	1.08808e-05	3.98884e-05	(0, 0)	0.79
SA_precuneus	cereal_bowlsperweek	Simple mode	31	-8.60153e-05	8.99159e-05	(0, 0)	0.35
SA_precuneus	cereal_bowlsperweek	Weighted mode	31	6.18211e-05	7.75966e-05	(0, 0)	0.43
SA_rostralanteriorcingulate	cereal_bowlsperweek	IVW(MRE)	16	-0.000232436	0.000178699	(0, 0)	0.19
SA_rostralanteriorcingulate	cereal_bowlsperweek	MR Egger	16	-0.000199817	0.000368647	(0, 0)	0.6
SA_rostralanteriorcingulate	cereal_bowlsperweek	Weighted median	16	-0.000166024	0.000166605	(0, 0)	0.32
SA_rostralanteriorcingulate	cereal_bowlsperweek	Simple mode	16	-0.000174453	0.000274186	(0, 0)	0.53
SA_rostralanteriorcingulate	cereal_bowlsperweek	Weighted mode	16	-0.000215834	0.000218448	(0, 0)	0.34
SA_rostralmiddlefrontal	cereal_bowlsperweek	IVW(MRE)	30	7.04904e-05	3.20642e-05	(0, 0)	0.028
SA_rostralmiddlefrontal	cereal_bowlsperweek	MR Egger	30	1.27511e-05	7.96679e-05	(0, 0)	0.87
SA_rostralmiddlefrontal	cereal_bowlsperweek	Weighted median	30	3.08774e-05	2.91963e-05	(0, 0)	0.29
SA_rostralmiddlefrontal	cereal_bowlsperweek	Simple mode	30	7.12096e-05	4.93554e-05	(0, 0)	0.16
SA_rostralmiddlefrontal	cereal_bowlsperweek	Weighted mode	30	4.67963e-05	4.10261e-05	(0, 0)	0.26
SA_superiorfrontal	cereal_bowlsperweek	IVW(MRE)	23	2.49081e-06	2.52611e-05	(0, 0)	0.92
SA_superiorfrontal	cereal_bowlsperweek	MR Egger	23	7.27534e-06	6.47746e-05	(0, 0)	0.91
SA_superiorfrontal	cereal_bowlsperweek	Weighted median	23	-2.82402e-05	3.3303e-05	(0, 0)	0.4
SA_superiorfrontal	cereal_bowlsperweek	Simple mode	23	-5.16605e-05	6.03451e-05	(0, 0)	0.4
SA_superiorfrontal	cereal_bowlsperweek	Weighted mode	23	-4.71458e-05	5.66792e-05	(0, 0)	0.41
SA_superiorparietal	cereal_bowlsperweek	IVW(MRE)	28	-8.61871e-06	2.1993e-05	(0, 0)	0.7
SA_superiorparietal	cereal_bowlsperweek	MR Egger	28	3.08646e-06	4.64933e-05	(0, 0)	0.95
SA_superiorparietal	cereal_bowlsperweek	Weighted median	28	2.86562e-06	2.62168e-05	(0, 0)	0.91
SA_superiorparietal	cereal_bowlsperweek	Simple mode	28	3.98948e-06	4.37595e-05	(0, 0)	0.93
SA_superiorparietal	cereal_bowlsperweek	Weighted mode	28	5.72773e-06	3.85479e-05	(0, 0)	0.88
SA_superiortemporal	cereal_bowlsperweek	IVW(MRE)	22	7.14745e-05	4.91493e-05	(0, 0)	0.15
SA_superiortemporal	cereal_bowlsperweek	MR Egger	22	-0.000243223	0.000129448	(0, 0)	0.07
SA_superiortemporal	cereal_bowlsperweek	Weighted median	22	8.87935e-06	5.63566e-05	(0, 0)	0.87
SA_superiortemporal	cereal_bowlsperweek	Simple mode	22	-3.49801e-05	0.000103406	(0, 0)	0.74
SA_superiortemporal	cereal_bowlsperweek	Weighted mode	22	-4.70438e-05	8.98869e-05	(0, 0)	0.61
SA_supramarginal	cereal_bowlsperweek	IVW(MRE)	24	-1.9066e-05	3.27813e-05	(0, 0)	0.56
SA_supramarginal	cereal_bowlsperweek	MR Egger	24	3.86896e-05	7.71695e-05	(0, 0)	0.62
SA_supramarginal	cereal_bowlsperweek	Weighted median	24	-1.26905e-05	3.65348e-05	(0, 0)	0.73
SA_supramarginal	cereal_bowlsperweek	Simple mode	24	-3.8049e-05	6.97217e-05	(0, 0)	0.59
SA_supramarginal	cereal_bowlsperweek	Weighted mode	24	4.23114e-07	5.65317e-05	(0, 0)	0.99
SA_temporalpole	cereal_bowlsperweek	IVW(MRE)	15	-4.48549e-05	0.000212927	(0, 0)	0.83
SA_temporalpole	cereal_bowlsperweek	MR Egger	15	0.000171664	0.000398957	(0, 0)	0.67
SA_temporalpole	cereal_bowlsperweek	Weighted median	15	0.000169021	0.000316046	(0, 0)	0.59
SA_temporalpole	cereal_bowlsperweek	Simple mode	15	0.000101565	0.000493999	(0, 0)	0.84
SA_temporalpole	cereal_bowlsperweek	Weighted mode	15	0.000213709	0.000413218	(0, 0)	0.61
SA_transversetemporal	cereal_bowlsperweek	IVW(MRE)	35	-8.95323e-06	0.000231996	(0, 0)	0.97
SA_transversetemporal	cereal_bowlsperweek	MR Egger	35	-0.00092098	0.000536292	(0, 0)	0.1
SA_transversetemporal	cereal_bowlsperweek	Weighted median	35	-9.9169e-05	0.000209222	(0, 0)	0.64
SA_transversetemporal	cereal_bowlsperweek	Simple mode	35	-0.000284664	0.000439314	(0, 0)	0.52
SA_transversetemporal	cereal_bowlsperweek	Weighted mode	35	-0.00030664	0.000378298	(0, 0)	0.42
THICK_bankssts	cereal_bowlsperweek	IVW(MRE)	12	0.136807	0.158184	(-0.17, 0.45)	0.39
THICK_bankssts	cereal_bowlsperweek	MR Egger	12	-0.406534	0.366893	(-1.13, 0.31)	0.29
THICK_bankssts	cereal_bowlsperweek	Weighted median	12	0.1637	0.167331	(-0.16, 0.49)	0.33
THICK_bankssts	cereal_bowlsperweek	Simple mode	12	0.303301	0.285658	(-0.26, 0.86)	0.31
THICK_bankssts	cereal_bowlsperweek	Weighted mode	12	0.226521	0.248086	(-0.26, 0.71)	0.38
THICK_caudalanteriorcingulate	cereal_bowlsperweek	IVW(MRE)	10	-0.0278586	0.0576533	(-0.14, 0.09)	0.63
THICK_caudalanteriorcingulate	cereal_bowlsperweek	MR Egger	10	0.0114534	0.119073	(-0.22, 0.24)	0.93
THICK_caudalanteriorcingulate	cereal_bowlsperweek	Weighted median	10	-0.0857958	0.084413	(-0.25, 0.08)	0.31
THICK_caudalanteriorcingulate	cereal_bowlsperweek	Simple mode	10	-0.0590751	0.136067	(-0.33, 0.21)	0.67
THICK_caudalanteriorcingulate	cereal_bowlsperweek	Weighted mode	10	-0.097081	0.118005	(-0.33, 0.13)	0.43
THICK_caudalmiddlefrontal	cereal_bowlsperweek	IVW(MRE)	12	0.169235	0.102177	(-0.03, 0.37)	0.1
THICK_caudalmiddlefrontal	cereal_bowlsperweek	MR Egger	12	-0.149148	0.322087	(-0.78, 0.48)	0.65
THICK_caudalmiddlefrontal	cereal_bowlsperweek	Weighted median	12	0.168995	0.172798	(-0.17, 0.51)	0.33
THICK_caudalmiddlefrontal	cereal_bowlsperweek	Simple mode	12	0.256517	0.285481	(-0.3, 0.82)	0.39
THICK_caudalmiddlefrontal	cereal_bowlsperweek	Weighted mode	12	0.271315	0.274458	(-0.27, 0.81)	0.34
THICK_cuneus	cereal_bowlsperweek	IVW(MRE)	8	-0.143846	0.149861	(-0.44, 0.15)	0.34
THICK_cuneus	cereal_bowlsperweek	MR Egger	8	-0.122426	0.361852	(-0.83, 0.59)	0.75
THICK_cuneus	cereal_bowlsperweek	Weighted median	8	-0.278309	0.190858	(-0.65, 0.1)	0.14
THICK_cuneus	cereal_bowlsperweek	Simple mode	8	-0.422059	0.34464	(-1.1, 0.25)	0.26
THICK_cuneus	cereal_bowlsperweek	Weighted mode	8	-0.460701	0.361633	(-1.17, 0.25)	0.24
THICK_entorhinal	cereal_bowlsperweek	IVW(MRE)	9	-0.0416487	0.040426	(-0.12, 0.04)	0.3
THICK_entorhinal	cereal_bowlsperweek	MR Egger	9	-0.0407232	0.175217	(-0.38, 0.3)	0.82
THICK_entorhinal	cereal_bowlsperweek	Weighted median	9	-0.0528822	0.063227	(-0.18, 0.07)	0.4
THICK_entorhinal	cereal_bowlsperweek	Simple mode	9	-0.0532347	0.0933706	(-0.24, 0.13)	0.58
THICK_entorhinal	cereal_bowlsperweek	Weighted mode	9	-0.0501878	0.0878044	(-0.22, 0.12)	0.58
THICK_frontalpole	cereal_bowlsperweek	IVW(MRE)	12	-0.0351684	0.0545761	(-0.14, 0.07)	0.52
THICK_frontalpole	cereal_bowlsperweek	MR Egger	12	-0.0344416	0.125539	(-0.28, 0.21)	0.79
THICK_frontalpole	cereal_bowlsperweek	Weighted median	12	0.0438695	0.0766683	(-0.11, 0.19)	0.57
THICK_frontalpole	cereal_bowlsperweek	Simple mode	12	0.0366805	0.11871	(-0.2, 0.27)	0.76
THICK_frontalpole	cereal_bowlsperweek	Weighted mode	12	0.057932	0.108916	(-0.16, 0.27)	0.61
THICK_fusiform	cereal_bowlsperweek	IVW(MRE)	8	-0.163164	0.198499	(-0.55, 0.23)	0.41
THICK_fusiform	cereal_bowlsperweek	MR Egger	8	-0.310793	0.469742	(-1.23, 0.61)	0.53
THICK_fusiform	cereal_bowlsperweek	Weighted median	8	-0.0506633	0.212065	(-0.47, 0.36)	0.81
THICK_fusiform	cereal_bowlsperweek	Simple mode	8	0.348697	0.448799	(-0.53, 1.23)	0.46
THICK_fusiform	cereal_bowlsperweek	Weighted mode	8	0.335237	0.442917	(-0.53, 1.2)	0.47
THICK_inferiorparietal	cereal_bowlsperweek	IVW(MRE)	13	0.131985	0.228639	(-0.32, 0.58)	0.56
THICK_inferiorparietal	cereal_bowlsperweek	MR Egger	13	0.366898	0.554223	(-0.72, 1.45)	0.52
THICK_inferiorparietal	cereal_bowlsperweek	Weighted median	13	0.374206	0.233097	(-0.08, 0.83)	0.11
THICK_inferiorparietal	cereal_bowlsperweek	Simple mode	13	0.397053	0.378042	(-0.34, 1.14)	0.31
THICK_inferiorparietal	cereal_bowlsperweek	Weighted mode	13	0.324936	0.359391	(-0.38, 1.03)	0.38
THICK_inferiortemporal	cereal_bowlsperweek	IVW(MRE)	18	0.178698	0.135308	(-0.09, 0.44)	0.19
THICK_inferiortemporal	cereal_bowlsperweek	MR Egger	18	-0.0247281	0.25669	(-0.53, 0.48)	0.92
THICK_inferiortemporal	cereal_bowlsperweek	Weighted median	18	0.0924502	0.123264	(-0.15, 0.33)	0.45
THICK_inferiortemporal	cereal_bowlsperweek	Simple mode	18	0.093928	0.192504	(-0.28, 0.47)	0.63
THICK_inferiortemporal	cereal_bowlsperweek	Weighted mode	18	0.0999872	0.182956	(-0.26, 0.46)	0.59
THICK_insula	cereal_bowlsperweek	IVW(MRE)	14	0.116231	0.17188	(-0.22, 0.45)	0.5
THICK_insula	cereal_bowlsperweek	MR Egger	14	0.724695	0.426494	(-0.11, 1.56)	0.12
THICK_insula	cereal_bowlsperweek	Weighted median	14	0.0954023	0.15064	(-0.2, 0.39)	0.53
THICK_insula	cereal_bowlsperweek	Simple mode	14	0.0865823	0.285285	(-0.47, 0.65)	0.77
THICK_insula	cereal_bowlsperweek	Weighted mode	14	0.0612118	0.212723	(-0.36, 0.48)	0.78
THICK_isthmuscingulate	cereal_bowlsperweek	IVW(MRE)	28	0.022159	0.0547979	(-0.09, 0.13)	0.69
THICK_isthmuscingulate	cereal_bowlsperweek	MR Egger	28	-0.151398	0.127131	(-0.4, 0.1)	0.24
THICK_isthmuscingulate	cereal_bowlsperweek	Weighted median	28	-0.0120601	0.0750822	(-0.16, 0.14)	0.87
THICK_isthmuscingulate	cereal_bowlsperweek	Simple mode	28	0.0218775	0.151943	(-0.28, 0.32)	0.89
THICK_isthmuscingulate	cereal_bowlsperweek	Weighted mode	28	-0.00108537	0.14229	(-0.28, 0.28)	0.99
THICK_lateraloccipital	cereal_bowlsperweek	IVW(MRE)	13	0.149177	0.166234	(-0.18, 0.47)	0.37
THICK_lateraloccipital	cereal_bowlsperweek	MR Egger	13	0.32746	0.369981	(-0.4, 1.05)	0.4
THICK_lateraloccipital	cereal_bowlsperweek	Weighted median	13	0.217746	0.184779	(-0.14, 0.58)	0.24
THICK_lateraloccipital	cereal_bowlsperweek	Simple mode	13	0.336518	0.298575	(-0.25, 0.92)	0.28
THICK_lateraloccipital	cereal_bowlsperweek	Weighted mode	13	0.304729	0.268	(-0.22, 0.83)	0.28
THICK_lateralorbitofrontal	cereal_bowlsperweek	IVW(MRE)	7	0.095313	0.178394	(-0.25, 0.44)	0.59
THICK_lateralorbitofrontal	cereal_bowlsperweek	MR Egger	7	-0.114463	0.307344	(-0.72, 0.49)	0.72
THICK_lateralorbitofrontal	cereal_bowlsperweek	Weighted median	7	-0.0478208	0.184769	(-0.41, 0.31)	0.8
THICK_lateralorbitofrontal	cereal_bowlsperweek	Simple mode	7	0.0153594	0.270295	(-0.51, 0.55)	0.96
THICK_lateralorbitofrontal	cereal_bowlsperweek	Weighted mode	7	-0.0707659	0.194719	(-0.45, 0.31)	0.73
THICK_lingual	cereal_bowlsperweek	IVW(MRE)	14	-0.347094	0.188589	(-0.72, 0.02)	0.07
THICK_lingual	cereal_bowlsperweek	MR Egger	14	0.621438	0.441816	(-0.24, 1.49)	0.18
THICK_lingual	cereal_bowlsperweek	Weighted median	14	-0.0188704	0.197028	(-0.41, 0.37)	0.92
THICK_lingual	cereal_bowlsperweek	Simple mode	14	0.0619967	0.34578	(-0.62, 0.74)	0.86
THICK_lingual	cereal_bowlsperweek	Weighted mode	14	0.123349	0.279811	(-0.43, 0.67)	0.67
THICK_medialorbitofrontal	cereal_bowlsperweek	IVW(MRE)	14	0.134317	0.0911172	(-0.04, 0.31)	0.14
THICK_medialorbitofrontal	cereal_bowlsperweek	MR Egger	14	-0.252645	0.236872	(-0.72, 0.21)	0.31
THICK_medialorbitofrontal	cereal_bowlsperweek	Weighted median	14	0.136342	0.115396	(-0.09, 0.36)	0.24
THICK_medialorbitofrontal	cereal_bowlsperweek	Simple mode	14	0.225252	0.206186	(-0.18, 0.63)	0.29
THICK_medialorbitofrontal	cereal_bowlsperweek	Weighted mode	14	0.151315	0.173221	(-0.19, 0.49)	0.4
THICK_middletemporal	cereal_bowlsperweek	IVW(MRE)	10	-0.00651869	0.129876	(-0.26, 0.25)	0.96
THICK_middletemporal	cereal_bowlsperweek	MR Egger	10	0.182743	0.29839	(-0.4, 0.77)	0.56
THICK_middletemporal	cereal_bowlsperweek	Weighted median	10	0.0957998	0.183355	(-0.26, 0.46)	0.6
THICK_middletemporal	cereal_bowlsperweek	Simple mode	10	0.263231	0.314146	(-0.35, 0.88)	0.42
THICK_middletemporal	cereal_bowlsperweek	Weighted mode	10	0.283515	0.305144	(-0.31, 0.88)	0.38
THICK_paracentral	cereal_bowlsperweek	IVW(MRE)	14	0.151026	0.12659	(-0.1, 0.4)	0.23
THICK_paracentral	cereal_bowlsperweek	MR Egger	14	0.164328	0.280339	(-0.39, 0.71)	0.57
THICK_paracentral	cereal_bowlsperweek	Weighted median	14	0.22027	0.15812	(-0.09, 0.53)	0.16
THICK_paracentral	cereal_bowlsperweek	Simple mode	14	0.342862	0.280011	(-0.21, 0.89)	0.24
THICK_paracentral	cereal_bowlsperweek	Weighted mode	14	0.279839	0.240968	(-0.19, 0.75)	0.27
THICK_parahippocampal	cereal_bowlsperweek	IVW(MRE)	26	-0.0385742	0.0315899	(-0.1, 0.02)	0.22
THICK_parahippocampal	cereal_bowlsperweek	MR Egger	26	-0.0874686	0.0743641	(-0.23, 0.06)	0.25
THICK_parahippocampal	cereal_bowlsperweek	Weighted median	26	-0.0342078	0.0469491	(-0.13, 0.06)	0.47
THICK_parahippocampal	cereal_bowlsperweek	Simple mode	26	-0.0398998	0.0879166	(-0.21, 0.13)	0.65
THICK_parahippocampal	cereal_bowlsperweek	Weighted mode	26	-0.0149445	0.0829431	(-0.18, 0.15)	0.86
THICK_parsopercularis	cereal_bowlsperweek	IVW(MRE)	16	0.134438	0.145438	(-0.15, 0.42)	0.36
THICK_parsopercularis	cereal_bowlsperweek	MR Egger	16	0.0752604	0.385224	(-0.68, 0.83)	0.85
THICK_parsopercularis	cereal_bowlsperweek	Weighted median	16	0.0209589	0.164444	(-0.3, 0.34)	0.9
THICK_parsopercularis	cereal_bowlsperweek	Simple mode	16	0.305736	0.319725	(-0.32, 0.93)	0.35
THICK_parsopercularis	cereal_bowlsperweek	Weighted mode	16	-0.134609	0.278811	(-0.68, 0.41)	0.64
THICK_parsorbitalis	cereal_bowlsperweek	IVW(MRE)	12	-0.037399	0.0442489	(-0.12, 0.05)	0.4
THICK_parsorbitalis	cereal_bowlsperweek	MR Egger	12	-0.0201581	0.157462	(-0.33, 0.29)	0.9
THICK_parsorbitalis	cereal_bowlsperweek	Weighted median	12	-0.0641643	0.0999999	(-0.26, 0.13)	0.52
THICK_parsorbitalis	cereal_bowlsperweek	Simple mode	12	-0.0832847	0.160726	(-0.4, 0.23)	0.61
THICK_parsorbitalis	cereal_bowlsperweek	Weighted mode	12	-0.07784	0.139892	(-0.35, 0.2)	0.59
THICK_parstriangularis	cereal_bowlsperweek	IVW(MRE)	18	0.170171	0.120256	(-0.07, 0.41)	0.16
THICK_parstriangularis	cereal_bowlsperweek	MR Egger	18	-0.0272907	0.269308	(-0.56, 0.5)	0.92
THICK_parstriangularis	cereal_bowlsperweek	Weighted median	18	0.044418	0.149164	(-0.25, 0.34)	0.77
THICK_parstriangularis	cereal_bowlsperweek	Simple mode	18	-0.11522	0.328733	(-0.76, 0.53)	0.73
THICK_parstriangularis	cereal_bowlsperweek	Weighted mode	18	-0.160583	0.295816	(-0.74, 0.42)	0.59
THICK_pericalcarine	cereal_bowlsperweek	IVW(MRE)	18	-0.022531	0.108174	(-0.23, 0.19)	0.84
THICK_pericalcarine	cereal_bowlsperweek	MR Egger	18	-0.115467	0.319834	(-0.74, 0.51)	0.72
THICK_pericalcarine	cereal_bowlsperweek	Weighted median	18	-0.114221	0.139973	(-0.39, 0.16)	0.41
THICK_pericalcarine	cereal_bowlsperweek	Simple mode	18	-0.255428	0.297355	(-0.84, 0.33)	0.4
THICK_pericalcarine	cereal_bowlsperweek	Weighted mode	18	-0.255428	0.268627	(-0.78, 0.27)	0.35
THICK_postcentral	cereal_bowlsperweek	IVW(MRE)	24	-0.207573	0.120789	(-0.44, 0.03)	0.09
THICK_postcentral	cereal_bowlsperweek	MR Egger	24	-0.275159	0.237287	(-0.74, 0.19)	0.26
THICK_postcentral	cereal_bowlsperweek	Weighted median	24	-0.201156	0.137058	(-0.47, 0.07)	0.14
THICK_postcentral	cereal_bowlsperweek	Simple mode	24	-0.247909	0.254978	(-0.75, 0.25)	0.34
THICK_postcentral	cereal_bowlsperweek	Weighted mode	24	-0.219911	0.13987	(-0.49, 0.05)	0.13
THICK_posteriorcingulate	cereal_bowlsperweek	IVW(MRE)	13	0.0969788	0.111558	(-0.12, 0.32)	0.38
THICK_posteriorcingulate	cereal_bowlsperweek	MR Egger	13	0.33112	0.40513	(-0.46, 1.13)	0.43
THICK_posteriorcingulate	cereal_bowlsperweek	Weighted median	13	0.122344	0.139527	(-0.15, 0.4)	0.38
THICK_posteriorcingulate	cereal_bowlsperweek	Simple mode	13	0.110324	0.221614	(-0.32, 0.54)	0.63
THICK_posteriorcingulate	cereal_bowlsperweek	Weighted mode	13	0.101739	0.195723	(-0.28, 0.49)	0.61
THICK_precentral	cereal_bowlsperweek	IVW(MRE)	14	0.15694	0.196915	(-0.23, 0.54)	0.43
THICK_precentral	cereal_bowlsperweek	MR Egger	14	1.13278	0.469756	(0.21, 2.05)	0.033
THICK_precentral	cereal_bowlsperweek	Weighted median	14	0.38005	0.196051	(0, 0.76)	0.05
THICK_precentral	cereal_bowlsperweek	Simple mode	14	0.342381	0.376411	(-0.4, 1.08)	0.38
THICK_precentral	cereal_bowlsperweek	Weighted mode	14	0.552902	0.276432	(0.01, 1.09)	0.07
THICK_precuneus	cereal_bowlsperweek	IVW(MRE)	20	-0.177797	0.154804	(-0.48, 0.13)	0.25
THICK_precuneus	cereal_bowlsperweek	MR Egger	20	0.0496984	0.374298	(-0.68, 0.78)	0.9
THICK_precuneus	cereal_bowlsperweek	Weighted median	20	-0.102484	0.19613	(-0.49, 0.28)	0.6
THICK_precuneus	cereal_bowlsperweek	Simple mode	20	0.0495317	0.407408	(-0.75, 0.85)	0.9
THICK_precuneus	cereal_bowlsperweek	Weighted mode	20	0.00475351	0.402563	(-0.78, 0.79)	0.99
THICK_rostralanteriorcingulate	cereal_bowlsperweek	IVW(MRE)	23	-0.0490694	0.0651866	(-0.18, 0.08)	0.45
THICK_rostralanteriorcingulate	cereal_bowlsperweek	MR Egger	23	0.0256589	0.161753	(-0.29, 0.34)	0.88
THICK_rostralanteriorcingulate	cereal_bowlsperweek	Weighted median	23	-0.106806	0.0789826	(-0.26, 0.05)	0.18
THICK_rostralanteriorcingulate	cereal_bowlsperweek	Simple mode	23	-0.16639	0.157171	(-0.47, 0.14)	0.3
THICK_rostralanteriorcingulate	cereal_bowlsperweek	Weighted mode	23	-0.152362	0.158098	(-0.46, 0.16)	0.35
THICK_rostralmiddlefrontal	cereal_bowlsperweek	IVW(MRE)	14	0.353359	0.188261	(-0.02, 0.72)	0.06
THICK_rostralmiddlefrontal	cereal_bowlsperweek	MR Egger	14	-0.0932285	0.533851	(-1.14, 0.95)	0.86
THICK_rostralmiddlefrontal	cereal_bowlsperweek	Weighted median	14	0.540732	0.202172	(0.14, 0.94)	0.0075
THICK_rostralmiddlefrontal	cereal_bowlsperweek	Simple mode	14	0.621074	0.346265	(-0.06, 1.3)	0.1
THICK_rostralmiddlefrontal	cereal_bowlsperweek	Weighted mode	14	0.604776	0.312258	(-0.01, 1.22)	0.07
THICK_superiorfrontal	cereal_bowlsperweek	IVW(MRE)	22	-0.0124369	0.0936477	(-0.2, 0.17)	0.89
THICK_superiorfrontal	cereal_bowlsperweek	MR Egger	22	-0.432188	0.268708	(-0.96, 0.09)	0.12
THICK_superiorfrontal	cereal_bowlsperweek	Weighted median	22	-0.0734927	0.156533	(-0.38, 0.23)	0.64
THICK_superiorfrontal	cereal_bowlsperweek	Simple mode	22	0.224156	0.310935	(-0.39, 0.83)	0.48
THICK_superiorfrontal	cereal_bowlsperweek	Weighted mode	22	-0.146578	0.294606	(-0.72, 0.43)	0.62
THICK_superiorparietal	cereal_bowlsperweek	IVW(MRE)	14	0.0946536	0.158581	(-0.22, 0.41)	0.55
THICK_superiorparietal	cereal_bowlsperweek	MR Egger	14	-0.252007	0.441798	(-1.12, 0.61)	0.58
THICK_superiorparietal	cereal_bowlsperweek	Weighted median	14	0.249696	0.216437	(-0.17, 0.67)	0.25
THICK_superiorparietal	cereal_bowlsperweek	Simple mode	14	0.427116	0.420872	(-0.4, 1.25)	0.33
THICK_superiorparietal	cereal_bowlsperweek	Weighted mode	14	0.461754	0.377418	(-0.28, 1.2)	0.24
THICK_superiortemporal	cereal_bowlsperweek	IVW(MRE)	11	-0.276706	0.121837	(-0.52, -0.04)	0.023
THICK_superiortemporal	cereal_bowlsperweek	MR Egger	11	0.0993624	0.263328	(-0.42, 0.62)	0.71
THICK_superiortemporal	cereal_bowlsperweek	Weighted median	11	-0.276018	0.174624	(-0.62, 0.07)	0.11
THICK_superiortemporal	cereal_bowlsperweek	Simple mode	11	-0.47059	0.309268	(-1.08, 0.14)	0.16
THICK_superiortemporal	cereal_bowlsperweek	Weighted mode	11	-0.308442	0.344391	(-0.98, 0.37)	0.39
THICK_supramarginal	cereal_bowlsperweek	IVW(MRE)	20	-0.151335	0.11937	(-0.39, 0.08)	0.2
THICK_supramarginal	cereal_bowlsperweek	MR Egger	20	0.34976	0.330655	(-0.3, 1)	0.3
THICK_supramarginal	cereal_bowlsperweek	Weighted median	20	-0.171236	0.172866	(-0.51, 0.17)	0.32
THICK_supramarginal	cereal_bowlsperweek	Simple mode	20	-0.197171	0.311836	(-0.81, 0.41)	0.53
THICK_supramarginal	cereal_bowlsperweek	Weighted mode	20	-0.18999	0.278182	(-0.74, 0.36)	0.5
THICK_temporalpole	cereal_bowlsperweek	IVW(MRE)	6	0.110255	0.0967218	(-0.08, 0.3)	0.25
THICK_temporalpole	cereal_bowlsperweek	MR Egger	6	0.139192	0.175332	(-0.2, 0.48)	0.47
THICK_temporalpole	cereal_bowlsperweek	Weighted median	6	0.204764	0.0945323	(0.02, 0.39)	0.03
THICK_temporalpole	cereal_bowlsperweek	Simple mode	6	0.230321	0.125059	(-0.01, 0.48)	0.12
THICK_temporalpole	cereal_bowlsperweek	Weighted mode	6	0.230321	0.115544	(0, 0.46)	0.1
THICK_transversetemporal	cereal_bowlsperweek	IVW(MRE)	12	-0.0976738	0.101393	(-0.3, 0.1)	0.34
THICK_transversetemporal	cereal_bowlsperweek	MR Egger	12	-0.147291	0.25774	(-0.65, 0.36)	0.58
THICK_transversetemporal	cereal_bowlsperweek	Weighted median	12	-0.0826775	0.1106	(-0.3, 0.13)	0.45
THICK_transversetemporal	cereal_bowlsperweek	Simple mode	12	-0.148018	0.218248	(-0.58, 0.28)	0.51
THICK_transversetemporal	cereal_bowlsperweek	Weighted mode	12	-0.148018	0.177916	(-0.5, 0.2)	0.42
SA_bankssts	cheese_overallfreq	IVW(MRE)	19	4.23175e-05	0.000106066	(0, 0)	0.69
SA_bankssts	cheese_overallfreq	MR Egger	19	0.000171786	0.000363011	(0, 0)	0.64
SA_bankssts	cheese_overallfreq	Weighted median	19	-5.46081e-05	0.000141543	(0, 0)	0.7
SA_bankssts	cheese_overallfreq	Simple mode	19	-0.000120756	0.000269862	(0, 0)	0.66
SA_bankssts	cheese_overallfreq	Weighted mode	19	-0.000137224	0.000277396	(0, 0)	0.63
SA_caudalanteriorcingulate	cheese_overallfreq	IVW(MRE)	15	-0.000155916	0.000173831	(0, 0)	0.37
SA_caudalanteriorcingulate	cheese_overallfreq	MR Egger	15	-0.000186251	0.000541822	(0, 0)	0.74
SA_caudalanteriorcingulate	cheese_overallfreq	Weighted median	15	-0.000295664	0.000178005	(0, 0)	0.1
SA_caudalanteriorcingulate	cheese_overallfreq	Simple mode	15	-0.000336726	0.000286227	(0, 0)	0.26
SA_caudalanteriorcingulate	cheese_overallfreq	Weighted mode	15	-0.000336726	0.000262525	(0, 0)	0.22
SA_caudalmiddlefrontal	cheese_overallfreq	IVW(MRE)	28	2.77814e-05	3.26927e-05	(0, 0)	0.4
SA_caudalmiddlefrontal	cheese_overallfreq	MR Egger	28	-4.20637e-05	9.3179e-05	(0, 0)	0.66
SA_caudalmiddlefrontal	cheese_overallfreq	Weighted median	28	3.48151e-05	4.41354e-05	(0, 0)	0.43
SA_caudalmiddlefrontal	cheese_overallfreq	Simple mode	28	1.77781e-05	9.26062e-05	(0, 0)	0.85
SA_caudalmiddlefrontal	cheese_overallfreq	Weighted mode	28	7.08983e-06	8.42236e-05	(0, 0)	0.93
SA_cuneus	cheese_overallfreq	IVW(MRE)	23	-0.000142966	8.86774e-05	(0, 0)	0.11
SA_cuneus	cheese_overallfreq	MR Egger	23	0.000479707	0.000281387	(0, 0)	0.1
SA_cuneus	cheese_overallfreq	Weighted median	23	-1.80717e-05	9.50769e-05	(0, 0)	0.85
SA_cuneus	cheese_overallfreq	Simple mode	23	-3.19307e-05	0.000175679	(0, 0)	0.86
SA_cuneus	cheese_overallfreq	Weighted mode	23	7.64349e-06	0.000157108	(0, 0)	0.96
SA_entorhinal	cheese_overallfreq	IVW(MRE)	15	3.57804e-05	0.000249296	(0, 0)	0.89
SA_entorhinal	cheese_overallfreq	MR Egger	15	0.00038782	0.00100773	(0, 0)	0.71
SA_entorhinal	cheese_overallfreq	Weighted median	15	-0.000162378	0.000266409	(0, 0)	0.54
SA_entorhinal	cheese_overallfreq	Simple mode	15	-0.000310206	0.000457314	(0, 0)	0.51
SA_entorhinal	cheese_overallfreq	Weighted mode	15	-0.000310206	0.000437944	(0, 0)	0.49
SA_frontalpole	cheese_overallfreq	IVW(MRE)	11	0.000112427	0.0003104	(0, 0)	0.72
SA_frontalpole	cheese_overallfreq	MR Egger	11	-0.000203383	0.000873254	(0, 0)	0.82
SA_frontalpole	cheese_overallfreq	Weighted median	11	0.000197832	0.000545346	(0, 0)	0.72
SA_frontalpole	cheese_overallfreq	Simple mode	11	0.000105266	0.000769633	(0, 0)	0.89
SA_frontalpole	cheese_overallfreq	Weighted mode	11	0.000121106	0.000689055	(0, 0)	0.86
SA_fusiform	cheese_overallfreq	IVW(MRE)	19	-4.36208e-07	6.70713e-05	(0, 0)	0.99
SA_fusiform	cheese_overallfreq	MR Egger	19	-8.55808e-05	0.000190431	(0, 0)	0.66
SA_fusiform	cheese_overallfreq	Weighted median	19	1.94017e-05	6.8091e-05	(0, 0)	0.78
SA_fusiform	cheese_overallfreq	Simple mode	19	0.000130156	0.000123744	(0, 0)	0.31
SA_fusiform	cheese_overallfreq	Weighted mode	19	0.000114048	0.000121345	(0, 0)	0.36
SA_inferiorparietal	cheese_overallfreq	IVW(MRE)	31	2.3101e-06	1.90707e-05	(0, 0)	0.9
SA_inferiorparietal	cheese_overallfreq	MR Egger	31	-3.43908e-05	4.9748e-05	(0, 0)	0.49
SA_inferiorparietal	cheese_overallfreq	Weighted median	31	-1.29644e-05	2.65271e-05	(0, 0)	0.63
SA_inferiorparietal	cheese_overallfreq	Simple mode	31	-6.07376e-05	5.6808e-05	(0, 0)	0.29
SA_inferiorparietal	cheese_overallfreq	Weighted mode	31	-5.93731e-05	5.09676e-05	(0, 0)	0.25
SA_inferiortemporal	cheese_overallfreq	IVW(MRE)	27	-4.65846e-05	4.37565e-05	(0, 0)	0.29
SA_inferiortemporal	cheese_overallfreq	MR Egger	27	-0.000148539	0.000134937	(0, 0)	0.28
SA_inferiortemporal	cheese_overallfreq	Weighted median	27	-4.71724e-05	4.59793e-05	(0, 0)	0.3
SA_inferiortemporal	cheese_overallfreq	Simple mode	27	-4.38912e-05	8.94252e-05	(0, 0)	0.63
SA_inferiortemporal	cheese_overallfreq	Weighted mode	27	-4.98212e-05	8.84447e-05	(0, 0)	0.58
SA_insula	cheese_overallfreq	IVW(MRE)	29	5.75638e-05	6.67977e-05	(0, 0)	0.39
SA_insula	cheese_overallfreq	MR Egger	29	8.1997e-05	0.000162357	(0, 0)	0.62
SA_insula	cheese_overallfreq	Weighted median	29	9.86557e-05	7.69334e-05	(0, 0)	0.2
SA_insula	cheese_overallfreq	Simple mode	29	0.000104738	0.000148048	(0, 0)	0.49
SA_insula	cheese_overallfreq	Weighted mode	29	9.99972e-05	0.00011637	(0, 0)	0.4
SA_isthmuscingulate	cheese_overallfreq	IVW(MRE)	20	2.59508e-06	0.000118809	(0, 0)	0.98
SA_isthmuscingulate	cheese_overallfreq	MR Egger	20	-0.000275318	0.000318152	(0, 0)	0.4
SA_isthmuscingulate	cheese_overallfreq	Weighted median	20	-2.37914e-06	0.000126065	(0, 0)	0.98
SA_isthmuscingulate	cheese_overallfreq	Simple mode	20	-5.38482e-05	0.000212674	(0, 0)	0.8
SA_isthmuscingulate	cheese_overallfreq	Weighted mode	20	-3.51389e-05	0.000202933	(0, 0)	0.86
SA_lateraloccipital	cheese_overallfreq	IVW(MRE)	20	-3.42754e-05	4.34321e-05	(0, 0)	0.43
SA_lateraloccipital	cheese_overallfreq	MR Egger	20	-9.97654e-05	0.000188902	(0, 0)	0.6
SA_lateraloccipital	cheese_overallfreq	Weighted median	20	3.36279e-06	4.33572e-05	(0, 0)	0.94
SA_lateraloccipital	cheese_overallfreq	Simple mode	20	4.20085e-05	6.86899e-05	(0, 0)	0.55
SA_lateraloccipital	cheese_overallfreq	Weighted mode	20	2.96187e-05	6.53537e-05	(0, 0)	0.66
SA_lateralorbitofrontal	cheese_overallfreq	IVW(MRE)	24	6.1115e-05	6.60907e-05	(0, 0)	0.36
SA_lateralorbitofrontal	cheese_overallfreq	MR Egger	24	-0.000100735	0.000260217	(0, 0)	0.7
SA_lateralorbitofrontal	cheese_overallfreq	Weighted median	24	9.57799e-05	6.96545e-05	(0, 0)	0.17
SA_lateralorbitofrontal	cheese_overallfreq	Simple mode	24	0.000174357	0.000140786	(0, 0)	0.23
SA_lateralorbitofrontal	cheese_overallfreq	Weighted mode	24	0.000198058	0.000114961	(0, 0)	0.1
SA_lingual	cheese_overallfreq	IVW(MRE)	39	-7.2713e-05	3.60251e-05	(0, 0)	0.044
SA_lingual	cheese_overallfreq	MR Egger	39	0.000156128	9.82763e-05	(0, 0)	0.12
SA_lingual	cheese_overallfreq	Weighted median	39	-3.10504e-05	3.54695e-05	(0, 0)	0.38
SA_lingual	cheese_overallfreq	Simple mode	39	3.43642e-05	7.89931e-05	(0, 0)	0.67
SA_lingual	cheese_overallfreq	Weighted mode	39	3.08086e-05	7.02403e-05	(0, 0)	0.66
SA_medialorbitofrontal	cheese_overallfreq	IVW(MRE)	10	4.22626e-05	0.000179964	(0, 0)	0.81
SA_medialorbitofrontal	cheese_overallfreq	MR Egger	10	0.00024385	0.00050899	(0, 0)	0.64
SA_medialorbitofrontal	cheese_overallfreq	Weighted median	10	9.5696e-05	0.0001396	(0, 0)	0.49
SA_medialorbitofrontal	cheese_overallfreq	Simple mode	10	0.000162407	0.000213377	(0, 0)	0.47
SA_medialorbitofrontal	cheese_overallfreq	Weighted mode	10	0.000181089	0.00022064	(0, 0)	0.43
SA_middletemporal	cheese_overallfreq	IVW(MRE)	22	-3.3217e-05	4.33286e-05	(0, 0)	0.44
SA_middletemporal	cheese_overallfreq	MR Egger	22	-4.95291e-05	0.000135318	(0, 0)	0.72
SA_middletemporal	cheese_overallfreq	Weighted median	22	9.24834e-06	5.87276e-05	(0, 0)	0.87
SA_middletemporal	cheese_overallfreq	Simple mode	22	8.15444e-05	0.000106307	(0, 0)	0.45
SA_middletemporal	cheese_overallfreq	Weighted mode	22	0.000106626	0.000115693	(0, 0)	0.37
SA_paracentral	cheese_overallfreq	IVW(MRE)	26	-0.000133608	7.19923e-05	(0, 0)	0.06
SA_paracentral	cheese_overallfreq	MR Egger	26	6.47542e-05	0.000148651	(0, 0)	0.67
SA_paracentral	cheese_overallfreq	Weighted median	26	-5.64028e-05	8.29332e-05	(0, 0)	0.5
SA_paracentral	cheese_overallfreq	Simple mode	26	-6.43485e-05	0.000155722	(0, 0)	0.68
SA_paracentral	cheese_overallfreq	Weighted mode	26	-5.89764e-05	0.00010958	(0, 0)	0.6
SA_parahippocampal	cheese_overallfreq	IVW(MRE)	15	2.5571e-05	0.000163859	(0, 0)	0.88
SA_parahippocampal	cheese_overallfreq	MR Egger	15	0.000292099	0.000351879	(0, 0)	0.42
SA_parahippocampal	cheese_overallfreq	Weighted median	15	5.12875e-05	0.000209971	(0, 0)	0.81
SA_parahippocampal	cheese_overallfreq	Simple mode	15	-0.000403037	0.000357716	(0, 0)	0.28
SA_parahippocampal	cheese_overallfreq	Weighted mode	15	0.000130194	0.000293459	(0, 0)	0.66
SA_parsopercularis	cheese_overallfreq	IVW(MRE)	20	9.96768e-05	7.33003e-05	(0, 0)	0.17
SA_parsopercularis	cheese_overallfreq	MR Egger	20	0.000118798	0.000154511	(0, 0)	0.45
SA_parsopercularis	cheese_overallfreq	Weighted median	20	8.92141e-05	7.91157e-05	(0, 0)	0.26
SA_parsopercularis	cheese_overallfreq	Simple mode	20	-0.000105373	0.000148431	(0, 0)	0.49
SA_parsopercularis	cheese_overallfreq	Weighted mode	20	8.93107e-05	0.000125885	(0, 0)	0.49
SA_parsorbitalis	cheese_overallfreq	IVW(MRE)	12	-5.28419e-05	0.000355388	(0, 0)	0.88
SA_parsorbitalis	cheese_overallfreq	MR Egger	12	-0.00106771	0.00139312	(0, 0)	0.46
SA_parsorbitalis	cheese_overallfreq	Weighted median	12	3.60243e-05	0.000295116	(0, 0)	0.9
SA_parsorbitalis	cheese_overallfreq	Simple mode	12	-0.000321643	0.000504242	(0, 0)	0.54
SA_parsorbitalis	cheese_overallfreq	Weighted mode	12	0.000234412	0.000482619	(0, 0)	0.64
SA_parstriangularis	cheese_overallfreq	IVW(MRE)	27	-5.75507e-05	5.17088e-05	(0, 0)	0.27
SA_parstriangularis	cheese_overallfreq	MR Egger	27	9.28527e-05	0.000119236	(0, 0)	0.44
SA_parstriangularis	cheese_overallfreq	Weighted median	27	-6.55506e-05	7.05561e-05	(0, 0)	0.35
SA_parstriangularis	cheese_overallfreq	Simple mode	27	-9.56946e-05	0.000134466	(0, 0)	0.48
SA_parstriangularis	cheese_overallfreq	Weighted mode	27	-6.83705e-05	0.000138667	(0, 0)	0.63
SA_pericalcarine	cheese_overallfreq	IVW(MRE)	39	-0.00012655	6.68199e-05	(0, 0)	0.06
SA_pericalcarine	cheese_overallfreq	MR Egger	39	0.000204979	0.000199307	(0, 0)	0.31
SA_pericalcarine	cheese_overallfreq	Weighted median	39	-1.07025e-05	5.48374e-05	(0, 0)	0.85
SA_pericalcarine	cheese_overallfreq	Simple mode	39	-6.91738e-06	0.000108881	(0, 0)	0.95
SA_pericalcarine	cheese_overallfreq	Weighted mode	39	-1.61395e-06	0.000106217	(0, 0)	0.99
SA_postcentral	cheese_overallfreq	IVW(MRE)	21	-5.21465e-05	4.23759e-05	(0, 0)	0.22
SA_postcentral	cheese_overallfreq	MR Egger	21	0.000136538	8.96881e-05	(0, 0)	0.14
SA_postcentral	cheese_overallfreq	Weighted median	21	-5.97585e-05	4.66312e-05	(0, 0)	0.2
SA_postcentral	cheese_overallfreq	Simple mode	21	-5.24874e-05	8.43391e-05	(0, 0)	0.54
SA_postcentral	cheese_overallfreq	Weighted mode	21	-1.87397e-05	5.36059e-05	(0, 0)	0.73
SA_posteriorcingulate	cheese_overallfreq	IVW(MRE)	24	-0.00013337	9.60417e-05	(0, 0)	0.16
SA_posteriorcingulate	cheese_overallfreq	MR Egger	24	0.00016919	0.00029348	(0, 0)	0.57
SA_posteriorcingulate	cheese_overallfreq	Weighted median	24	-0.000133246	0.000118169	(0, 0)	0.26
SA_posteriorcingulate	cheese_overallfreq	Simple mode	24	-0.00013306	0.000230137	(0, 0)	0.57
SA_posteriorcingulate	cheese_overallfreq	Weighted mode	24	-0.000113494	0.000219754	(0, 0)	0.61
SA_precentral	cheese_overallfreq	IVW(MRE)	25	2.38638e-05	2.78085e-05	(0, 0)	0.39
SA_precentral	cheese_overallfreq	MR Egger	25	4.02879e-05	4.61774e-05	(0, 0)	0.39
SA_precentral	cheese_overallfreq	Weighted median	25	3.45505e-05	3.06344e-05	(0, 0)	0.26
SA_precentral	cheese_overallfreq	Simple mode	25	4.76888e-05	5.98547e-05	(0, 0)	0.43
SA_precentral	cheese_overallfreq	Weighted mode	25	3.67459e-05	3.05344e-05	(0, 0)	0.24
SA_precuneus	cheese_overallfreq	IVW(MRE)	31	-1.11512e-05	4.40633e-05	(0, 0)	0.8
SA_precuneus	cheese_overallfreq	MR Egger	31	-5.85348e-05	0.000106147	(0, 0)	0.59
SA_precuneus	cheese_overallfreq	Weighted median	31	-1.34471e-05	4.29367e-05	(0, 0)	0.75
SA_precuneus	cheese_overallfreq	Simple mode	31	-6.39582e-06	8.18861e-05	(0, 0)	0.94
SA_precuneus	cheese_overallfreq	Weighted mode	31	-1.74411e-05	6.14478e-05	(0, 0)	0.78
SA_rostralanteriorcingulate	cheese_overallfreq	IVW(MRE)	16	0.000121342	0.000198923	(0, 0)	0.54
SA_rostralanteriorcingulate	cheese_overallfreq	MR Egger	16	-0.000182508	0.000399695	(0, 0)	0.65
SA_rostralanteriorcingulate	cheese_overallfreq	Weighted median	16	2.74778e-06	0.000160787	(0, 0)	0.99
SA_rostralanteriorcingulate	cheese_overallfreq	Simple mode	16	2.19916e-05	0.00022543	(0, 0)	0.92
SA_rostralanteriorcingulate	cheese_overallfreq	Weighted mode	16	1.90426e-06	0.000193328	(0, 0)	0.99
SA_rostralmiddlefrontal	cheese_overallfreq	IVW(MRE)	30	-2.05724e-05	2.87071e-05	(0, 0)	0.47
SA_rostralmiddlefrontal	cheese_overallfreq	MR Egger	30	6.63227e-05	6.98974e-05	(0, 0)	0.35
SA_rostralmiddlefrontal	cheese_overallfreq	Weighted median	30	4.51383e-05	2.9532e-05	(0, 0)	0.13
SA_rostralmiddlefrontal	cheese_overallfreq	Simple mode	30	7.38606e-05	5.50367e-05	(0, 0)	0.19
SA_rostralmiddlefrontal	cheese_overallfreq	Weighted mode	30	7.19308e-05	4.8067e-05	(0, 0)	0.15
SA_superiorfrontal	cheese_overallfreq	IVW(MRE)	23	2.01474e-05	3.26842e-05	(0, 0)	0.54
SA_superiorfrontal	cheese_overallfreq	MR Egger	23	-7.00743e-05	8.10023e-05	(0, 0)	0.4
SA_superiorfrontal	cheese_overallfreq	Weighted median	23	2.58753e-05	3.40763e-05	(0, 0)	0.45
SA_superiorfrontal	cheese_overallfreq	Simple mode	23	9.31897e-06	7.24633e-05	(0, 0)	0.9
SA_superiorfrontal	cheese_overallfreq	Weighted mode	23	9.31897e-06	6.59291e-05	(0, 0)	0.89
SA_superiorparietal	cheese_overallfreq	IVW(MRE)	28	3.04178e-05	2.68982e-05	(0, 0)	0.26
SA_superiorparietal	cheese_overallfreq	MR Egger	28	9.1304e-05	5.53067e-05	(0, 0)	0.11
SA_superiorparietal	cheese_overallfreq	Weighted median	28	4.8945e-05	2.82224e-05	(0, 0)	0.08
SA_superiorparietal	cheese_overallfreq	Simple mode	28	4.17186e-05	5.9126e-05	(0, 0)	0.49
SA_superiorparietal	cheese_overallfreq	Weighted mode	28	3.56081e-05	3.8036e-05	(0, 0)	0.36
SA_superiortemporal	cheese_overallfreq	IVW(MRE)	22	7.12299e-06	6.78665e-05	(0, 0)	0.92
SA_superiortemporal	cheese_overallfreq	MR Egger	22	-0.000121111	0.000204187	(0, 0)	0.56
SA_superiortemporal	cheese_overallfreq	Weighted median	22	-9.99232e-05	5.93934e-05	(0, 0)	0.09
SA_superiortemporal	cheese_overallfreq	Simple mode	22	-0.000131667	0.000104512	(0, 0)	0.22
SA_superiortemporal	cheese_overallfreq	Weighted mode	22	-0.000124117	9.40832e-05	(0, 0)	0.2
SA_supramarginal	cheese_overallfreq	IVW(MRE)	24	4.10227e-06	2.69826e-05	(0, 0)	0.88
SA_supramarginal	cheese_overallfreq	MR Egger	24	-6.64489e-05	6.23153e-05	(0, 0)	0.3
SA_supramarginal	cheese_overallfreq	Weighted median	24	-1.57095e-05	3.65507e-05	(0, 0)	0.67
SA_supramarginal	cheese_overallfreq	Simple mode	24	-5.24242e-05	7.89239e-05	(0, 0)	0.51
SA_supramarginal	cheese_overallfreq	Weighted mode	24	-5.41053e-05	5.63781e-05	(0, 0)	0.35
SA_temporalpole	cheese_overallfreq	IVW(MRE)	15	0.000509294	0.000441067	(0, 0)	0.25
SA_temporalpole	cheese_overallfreq	MR Egger	15	7.91956e-05	0.000790473	(0, 0)	0.92
SA_temporalpole	cheese_overallfreq	Weighted median	15	0.000324628	0.000358126	(0, 0)	0.36
SA_temporalpole	cheese_overallfreq	Simple mode	15	0.000236246	0.000554122	(0, 0)	0.68
SA_temporalpole	cheese_overallfreq	Weighted mode	15	0.000161259	0.000452828	(0, 0)	0.73
SA_transversetemporal	cheese_overallfreq	IVW(MRE)	35	3.37906e-05	0.00025839	(0, 0)	0.9
SA_transversetemporal	cheese_overallfreq	MR Egger	35	-0.000592935	0.000616592	(0, 0)	0.34
SA_transversetemporal	cheese_overallfreq	Weighted median	35	3.50743e-05	0.000227934	(0, 0)	0.88
SA_transversetemporal	cheese_overallfreq	Simple mode	35	0.000357636	0.000481154	(0, 0)	0.46
SA_transversetemporal	cheese_overallfreq	Weighted mode	35	-7.103e-05	0.00042787	(0, 0)	0.87
THICK_bankssts	cheese_overallfreq	IVW(MRE)	12	0.0327274	0.0967704	(-0.16, 0.22)	0.74
THICK_bankssts	cheese_overallfreq	MR Egger	12	0.00342313	0.266457	(-0.52, 0.53)	0.99
THICK_bankssts	cheese_overallfreq	Weighted median	12	-0.0599999	0.152929	(-0.36, 0.24)	0.69
THICK_bankssts	cheese_overallfreq	Simple mode	12	-0.231415	0.277454	(-0.78, 0.31)	0.42
THICK_bankssts	cheese_overallfreq	Weighted mode	12	-0.227442	0.279601	(-0.78, 0.32)	0.43
THICK_caudalanteriorcingulate	cheese_overallfreq	IVW(MRE)	10	-0.0391186	0.0779667	(-0.19, 0.11)	0.62
THICK_caudalanteriorcingulate	cheese_overallfreq	MR Egger	10	0.199079	0.128503	(-0.05, 0.45)	0.16
THICK_caudalanteriorcingulate	cheese_overallfreq	Weighted median	10	-7.2627e-05	0.0848556	(-0.17, 0.17)	1
THICK_caudalanteriorcingulate	cheese_overallfreq	Simple mode	10	0.0116346	0.134681	(-0.25, 0.28)	0.93
THICK_caudalanteriorcingulate	cheese_overallfreq	Weighted mode	10	0.0621274	0.0995738	(-0.13, 0.26)	0.55
THICK_caudalmiddlefrontal	cheese_overallfreq	IVW(MRE)	12	-0.0354201	0.122587	(-0.28, 0.2)	0.77
THICK_caudalmiddlefrontal	cheese_overallfreq	MR Egger	12	0.125692	0.323692	(-0.51, 0.76)	0.71
THICK_caudalmiddlefrontal	cheese_overallfreq	Weighted median	12	-0.144039	0.183579	(-0.5, 0.22)	0.43
THICK_caudalmiddlefrontal	cheese_overallfreq	Simple mode	12	-0.189705	0.294721	(-0.77, 0.39)	0.53
THICK_caudalmiddlefrontal	cheese_overallfreq	Weighted mode	12	-0.163825	0.278366	(-0.71, 0.38)	0.57
THICK_cuneus	cheese_overallfreq	IVW(MRE)	8	0.319464	0.375518	(-0.42, 1.06)	0.39
THICK_cuneus	cheese_overallfreq	MR Egger	8	0.572659	0.899439	(-1.19, 2.34)	0.55
THICK_cuneus	cheese_overallfreq	Weighted median	8	0.00624539	0.212417	(-0.41, 0.42)	0.98
THICK_cuneus	cheese_overallfreq	Simple mode	8	-0.0543887	0.269527	(-0.58, 0.47)	0.85
THICK_cuneus	cheese_overallfreq	Weighted mode	8	-0.0543887	0.231893	(-0.51, 0.4)	0.82
THICK_entorhinal	cheese_overallfreq	IVW(MRE)	9	0.0469883	0.0582275	(-0.07, 0.16)	0.42
THICK_entorhinal	cheese_overallfreq	MR Egger	9	0.309257	0.202541	(-0.09, 0.71)	0.17
THICK_entorhinal	cheese_overallfreq	Weighted median	9	-0.033547	0.0727586	(-0.18, 0.11)	0.64
THICK_entorhinal	cheese_overallfreq	Simple mode	9	-0.0468118	0.12109	(-0.28, 0.19)	0.71
THICK_entorhinal	cheese_overallfreq	Weighted mode	9	-0.0444798	0.121879	(-0.28, 0.19)	0.72
THICK_frontalpole	cheese_overallfreq	IVW(MRE)	12	-0.0365844	0.0333288	(-0.1, 0.03)	0.27
THICK_frontalpole	cheese_overallfreq	MR Egger	12	0.0424203	0.11862	(-0.19, 0.27)	0.73
THICK_frontalpole	cheese_overallfreq	Weighted median	12	-0.0220765	0.0710317	(-0.16, 0.12)	0.76
THICK_frontalpole	cheese_overallfreq	Simple mode	12	0.0391281	0.11046	(-0.18, 0.26)	0.73
THICK_frontalpole	cheese_overallfreq	Weighted mode	12	0.0421147	0.114175	(-0.18, 0.27)	0.72
THICK_fusiform	cheese_overallfreq	IVW(MRE)	8	0.0858502	0.0702949	(-0.05, 0.22)	0.22
THICK_fusiform	cheese_overallfreq	MR Egger	8	0.141774	0.336229	(-0.52, 0.8)	0.69
THICK_fusiform	cheese_overallfreq	Weighted median	8	0.0485609	0.184214	(-0.31, 0.41)	0.79
THICK_fusiform	cheese_overallfreq	Simple mode	8	0.00483182	0.281713	(-0.55, 0.56)	0.99
THICK_fusiform	cheese_overallfreq	Weighted mode	8	0.00969836	0.262013	(-0.5, 0.52)	0.97
THICK_inferiorparietal	cheese_overallfreq	IVW(MRE)	13	0.110017	0.195563	(-0.27, 0.49)	0.57
THICK_inferiorparietal	cheese_overallfreq	MR Egger	13	-0.0406671	0.475891	(-0.97, 0.89)	0.93
THICK_inferiorparietal	cheese_overallfreq	Weighted median	13	0.360191	0.228266	(-0.09, 0.81)	0.11
THICK_inferiorparietal	cheese_overallfreq	Simple mode	13	0.504874	0.408628	(-0.3, 1.31)	0.24
THICK_inferiorparietal	cheese_overallfreq	Weighted mode	13	0.475225	0.397617	(-0.3, 1.25)	0.26
THICK_inferiortemporal	cheese_overallfreq	IVW(MRE)	18	0.0228482	0.120841	(-0.21, 0.26)	0.85
THICK_inferiortemporal	cheese_overallfreq	MR Egger	18	-0.0696716	0.233819	(-0.53, 0.39)	0.77
THICK_inferiortemporal	cheese_overallfreq	Weighted median	18	-0.1389	0.131137	(-0.4, 0.12)	0.29
THICK_inferiortemporal	cheese_overallfreq	Simple mode	18	-0.237355	0.200228	(-0.63, 0.16)	0.25
THICK_inferiortemporal	cheese_overallfreq	Weighted mode	18	-0.209352	0.177397	(-0.56, 0.14)	0.25
THICK_insula	cheese_overallfreq	IVW(MRE)	14	-0.0874747	0.172443	(-0.43, 0.25)	0.61
THICK_insula	cheese_overallfreq	MR Egger	14	-0.376432	0.459676	(-1.28, 0.52)	0.43
THICK_insula	cheese_overallfreq	Weighted median	14	-0.0500887	0.151067	(-0.35, 0.25)	0.74
THICK_insula	cheese_overallfreq	Simple mode	14	-0.0545857	0.220499	(-0.49, 0.38)	0.81
THICK_insula	cheese_overallfreq	Weighted mode	14	-0.0632048	0.19992	(-0.46, 0.33)	0.76
THICK_isthmuscingulate	cheese_overallfreq	IVW(MRE)	28	0.0721332	0.0745832	(-0.07, 0.22)	0.33
THICK_isthmuscingulate	cheese_overallfreq	MR Egger	28	-0.148306	0.173983	(-0.49, 0.19)	0.4
THICK_isthmuscingulate	cheese_overallfreq	Weighted median	28	0.0623045	0.074338	(-0.08, 0.21)	0.4
THICK_isthmuscingulate	cheese_overallfreq	Simple mode	28	0.18015	0.165916	(-0.15, 0.51)	0.29
THICK_isthmuscingulate	cheese_overallfreq	Weighted mode	28	0.0225063	0.156065	(-0.28, 0.33)	0.89
THICK_lateraloccipital	cheese_overallfreq	IVW(MRE)	13	-0.181038	0.185693	(-0.54, 0.18)	0.33
THICK_lateraloccipital	cheese_overallfreq	MR Egger	13	-0.0109408	0.41484	(-0.82, 0.8)	0.98
THICK_lateraloccipital	cheese_overallfreq	Weighted median	13	-0.116831	0.186349	(-0.48, 0.25)	0.53
THICK_lateraloccipital	cheese_overallfreq	Simple mode	13	-0.134869	0.253492	(-0.63, 0.36)	0.6
THICK_lateraloccipital	cheese_overallfreq	Weighted mode	13	-0.100539	0.251358	(-0.59, 0.39)	0.7
THICK_lateralorbitofrontal	cheese_overallfreq	IVW(MRE)	7	0.0733163	0.113832	(-0.15, 0.3)	0.52
THICK_lateralorbitofrontal	cheese_overallfreq	MR Egger	7	0.0574977	0.219726	(-0.37, 0.49)	0.8
THICK_lateralorbitofrontal	cheese_overallfreq	Weighted median	7	0.0712452	0.16639	(-0.25, 0.4)	0.67
THICK_lateralorbitofrontal	cheese_overallfreq	Simple mode	7	-0.019484	0.241654	(-0.49, 0.45)	0.94
THICK_lateralorbitofrontal	cheese_overallfreq	Weighted mode	7	-0.012526	0.216669	(-0.44, 0.41)	0.96
THICK_lingual	cheese_overallfreq	IVW(MRE)	14	0.0345301	0.236982	(-0.43, 0.5)	0.88
THICK_lingual	cheese_overallfreq	MR Egger	14	-0.0782165	0.670621	(-1.39, 1.24)	0.91
THICK_lingual	cheese_overallfreq	Weighted median	14	0.0291279	0.193783	(-0.35, 0.41)	0.88
THICK_lingual	cheese_overallfreq	Simple mode	14	0.192674	0.322353	(-0.44, 0.82)	0.56
THICK_lingual	cheese_overallfreq	Weighted mode	14	0.140933	0.291162	(-0.43, 0.71)	0.64
THICK_medialorbitofrontal	cheese_overallfreq	IVW(MRE)	14	0.120115	0.0858378	(-0.05, 0.29)	0.16
THICK_medialorbitofrontal	cheese_overallfreq	MR Egger	14	0.408703	0.233509	(-0.05, 0.87)	0.11
THICK_medialorbitofrontal	cheese_overallfreq	Weighted median	14	0.094199	0.122654	(-0.15, 0.33)	0.44
THICK_medialorbitofrontal	cheese_overallfreq	Simple mode	14	0.0225808	0.223516	(-0.42, 0.46)	0.92
THICK_medialorbitofrontal	cheese_overallfreq	Weighted mode	14	0.0619769	0.198756	(-0.33, 0.45)	0.76
THICK_middletemporal	cheese_overallfreq	IVW(MRE)	10	-0.134153	0.177733	(-0.48, 0.21)	0.45
THICK_middletemporal	cheese_overallfreq	MR Egger	10	-0.501286	0.395256	(-1.28, 0.27)	0.24
THICK_middletemporal	cheese_overallfreq	Weighted median	10	-0.060765	0.200295	(-0.45, 0.33)	0.76
THICK_middletemporal	cheese_overallfreq	Simple mode	10	0.36961	0.423463	(-0.46, 1.2)	0.41
THICK_middletemporal	cheese_overallfreq	Weighted mode	10	0.341516	0.410698	(-0.46, 1.15)	0.43
THICK_paracentral	cheese_overallfreq	IVW(MRE)	14	-0.12132	0.178724	(-0.47, 0.23)	0.5
THICK_paracentral	cheese_overallfreq	MR Egger	14	-0.212905	0.39473	(-0.99, 0.56)	0.6
THICK_paracentral	cheese_overallfreq	Weighted median	14	-0.332486	0.16931	(-0.66, 0)	0.05
THICK_paracentral	cheese_overallfreq	Simple mode	14	-0.398913	0.287334	(-0.96, 0.16)	0.19
THICK_paracentral	cheese_overallfreq	Weighted mode	14	-0.305019	0.234182	(-0.76, 0.15)	0.22
THICK_parahippocampal	cheese_overallfreq	IVW(MRE)	26	-0.0960305	0.0483761	(-0.19, 0)	0.047
THICK_parahippocampal	cheese_overallfreq	MR Egger	26	-0.121615	0.112163	(-0.34, 0.1)	0.29
THICK_parahippocampal	cheese_overallfreq	Weighted median	26	-0.0429706	0.0530755	(-0.15, 0.06)	0.42
THICK_parahippocampal	cheese_overallfreq	Simple mode	26	-0.0254171	0.112301	(-0.25, 0.19)	0.82
THICK_parahippocampal	cheese_overallfreq	Weighted mode	26	-0.0254171	0.100563	(-0.22, 0.17)	0.8
THICK_parsopercularis	cheese_overallfreq	IVW(MRE)	16	0.25335	0.128422	(0, 0.51)	0.049
THICK_parsopercularis	cheese_overallfreq	MR Egger	16	-0.298659	0.300494	(-0.89, 0.29)	0.34
THICK_parsopercularis	cheese_overallfreq	Weighted median	16	0.297509	0.162847	(-0.02, 0.62)	0.07
THICK_parsopercularis	cheese_overallfreq	Simple mode	16	0.383936	0.309948	(-0.22, 0.99)	0.23
THICK_parsopercularis	cheese_overallfreq	Weighted mode	16	0.301616	0.275474	(-0.24, 0.84)	0.29
THICK_parsorbitalis	cheese_overallfreq	IVW(MRE)	12	0.0179618	0.0649291	(-0.11, 0.15)	0.78
THICK_parsorbitalis	cheese_overallfreq	MR Egger	12	0.155635	0.158259	(-0.15, 0.47)	0.35
THICK_parsorbitalis	cheese_overallfreq	Weighted median	12	0.0659588	0.109872	(-0.15, 0.28)	0.55
THICK_parsorbitalis	cheese_overallfreq	Simple mode	12	0.129366	0.157586	(-0.18, 0.44)	0.43
THICK_parsorbitalis	cheese_overallfreq	Weighted mode	12	0.100351	0.139823	(-0.17, 0.37)	0.49
THICK_parstriangularis	cheese_overallfreq	IVW(MRE)	18	-0.334668	0.133599	(-0.6, -0.07)	0.012
THICK_parstriangularis	cheese_overallfreq	MR Egger	18	0.129261	0.276472	(-0.41, 0.67)	0.65
THICK_parstriangularis	cheese_overallfreq	Weighted median	18	-0.228095	0.151476	(-0.52, 0.07)	0.13
THICK_parstriangularis	cheese_overallfreq	Simple mode	18	-0.266245	0.301598	(-0.86, 0.32)	0.39
THICK_parstriangularis	cheese_overallfreq	Weighted mode	18	-0.195632	0.305122	(-0.79, 0.4)	0.53
THICK_pericalcarine	cheese_overallfreq	IVW(MRE)	18	-0.188682	0.12431	(-0.43, 0.05)	0.13
THICK_pericalcarine	cheese_overallfreq	MR Egger	18	0.648709	0.293364	(0.07, 1.22)	0.042
THICK_pericalcarine	cheese_overallfreq	Weighted median	18	-0.137148	0.142914	(-0.42, 0.14)	0.34
THICK_pericalcarine	cheese_overallfreq	Simple mode	18	-0.360092	0.281119	(-0.91, 0.19)	0.22
THICK_pericalcarine	cheese_overallfreq	Weighted mode	18	-0.31776	0.244514	(-0.8, 0.16)	0.21
THICK_postcentral	cheese_overallfreq	IVW(MRE)	24	0.0162547	0.132905	(-0.24, 0.28)	0.9
THICK_postcentral	cheese_overallfreq	MR Egger	24	0.197244	0.257815	(-0.31, 0.7)	0.45
THICK_postcentral	cheese_overallfreq	Weighted median	24	0.113105	0.135082	(-0.15, 0.38)	0.4
THICK_postcentral	cheese_overallfreq	Simple mode	24	0.0434869	0.228495	(-0.4, 0.49)	0.85
THICK_postcentral	cheese_overallfreq	Weighted mode	24	0.0985387	0.131156	(-0.16, 0.36)	0.46
THICK_posteriorcingulate	cheese_overallfreq	IVW(MRE)	13	0.0633271	0.161196	(-0.25, 0.38)	0.69
THICK_posteriorcingulate	cheese_overallfreq	MR Egger	13	-0.346326	0.58092	(-1.48, 0.79)	0.56
THICK_posteriorcingulate	cheese_overallfreq	Weighted median	13	-0.191986	0.167435	(-0.52, 0.14)	0.25
THICK_posteriorcingulate	cheese_overallfreq	Simple mode	13	-0.316495	0.273448	(-0.85, 0.22)	0.27
THICK_posteriorcingulate	cheese_overallfreq	Weighted mode	13	-0.309863	0.26753	(-0.83, 0.21)	0.27
THICK_precentral	cheese_overallfreq	IVW(MRE)	14	0.157117	0.146184	(-0.13, 0.44)	0.28
THICK_precentral	cheese_overallfreq	MR Egger	14	0.0616063	0.41385	(-0.75, 0.87)	0.88
THICK_precentral	cheese_overallfreq	Weighted median	14	0.20549	0.182592	(-0.15, 0.56)	0.26
THICK_precentral	cheese_overallfreq	Simple mode	14	0.399499	0.305681	(-0.2, 1)	0.21
THICK_precentral	cheese_overallfreq	Weighted mode	14	0.293294	0.233069	(-0.16, 0.75)	0.23
THICK_precuneus	cheese_overallfreq	IVW(MRE)	20	0.11899	0.16235	(-0.2, 0.44)	0.46
THICK_precuneus	cheese_overallfreq	MR Egger	20	-0.0566131	0.394803	(-0.83, 0.72)	0.89
THICK_precuneus	cheese_overallfreq	Weighted median	20	0.264115	0.199903	(-0.13, 0.66)	0.19
THICK_precuneus	cheese_overallfreq	Simple mode	20	0.433786	0.411517	(-0.37, 1.24)	0.31
THICK_precuneus	cheese_overallfreq	Weighted mode	20	0.433786	0.420021	(-0.39, 1.26)	0.31
THICK_rostralanteriorcingulate	cheese_overallfreq	IVW(MRE)	23	-0.0777511	0.072531	(-0.22, 0.06)	0.28
THICK_rostralanteriorcingulate	cheese_overallfreq	MR Egger	23	0.0125315	0.179855	(-0.34, 0.37)	0.95
THICK_rostralanteriorcingulate	cheese_overallfreq	Weighted median	23	-0.164756	0.0827583	(-0.33, 0)	0.047
THICK_rostralanteriorcingulate	cheese_overallfreq	Simple mode	23	-0.213512	0.18761	(-0.58, 0.15)	0.27
THICK_rostralanteriorcingulate	cheese_overallfreq	Weighted mode	23	-0.191645	0.164212	(-0.51, 0.13)	0.26
THICK_rostralmiddlefrontal	cheese_overallfreq	IVW(MRE)	14	0.208029	0.215961	(-0.22, 0.63)	0.34
THICK_rostralmiddlefrontal	cheese_overallfreq	MR Egger	14	-0.418761	0.602101	(-1.6, 0.76)	0.5
THICK_rostralmiddlefrontal	cheese_overallfreq	Weighted median	14	0.321422	0.209629	(-0.09, 0.73)	0.13
THICK_rostralmiddlefrontal	cheese_overallfreq	Simple mode	14	0.371388	0.336024	(-0.29, 1.03)	0.29
THICK_rostralmiddlefrontal	cheese_overallfreq	Weighted mode	14	0.371388	0.272716	(-0.16, 0.91)	0.2
THICK_superiorfrontal	cheese_overallfreq	IVW(MRE)	22	-0.0128131	0.178078	(-0.36, 0.34)	0.94
THICK_superiorfrontal	cheese_overallfreq	MR Egger	22	0.136917	0.427245	(-0.7, 0.97)	0.75
THICK_superiorfrontal	cheese_overallfreq	Weighted median	22	0.0629786	0.16616	(-0.26, 0.39)	0.7
THICK_superiorfrontal	cheese_overallfreq	Simple mode	22	-0.0233015	0.290755	(-0.59, 0.55)	0.94
THICK_superiorfrontal	cheese_overallfreq	Weighted mode	22	-0.0233015	0.284485	(-0.58, 0.53)	0.94
THICK_superiorparietal	cheese_overallfreq	IVW(MRE)	14	0.0665478	0.174356	(-0.28, 0.41)	0.7
THICK_superiorparietal	cheese_overallfreq	MR Egger	14	0.792056	0.446429	(-0.08, 1.67)	0.1
THICK_superiorparietal	cheese_overallfreq	Weighted median	14	0.0727432	0.199054	(-0.32, 0.46)	0.71
THICK_superiorparietal	cheese_overallfreq	Simple mode	14	-0.0683131	0.293958	(-0.64, 0.51)	0.82
THICK_superiorparietal	cheese_overallfreq	Weighted mode	14	0.163729	0.278735	(-0.38, 0.71)	0.57
THICK_superiortemporal	cheese_overallfreq	IVW(MRE)	11	-0.321068	0.157805	(-0.63, -0.01)	0.042
THICK_superiortemporal	cheese_overallfreq	MR Egger	11	-0.186577	0.337321	(-0.85, 0.47)	0.59
THICK_superiortemporal	cheese_overallfreq	Weighted median	11	-0.056756	0.185658	(-0.42, 0.31)	0.76
THICK_superiortemporal	cheese_overallfreq	Simple mode	11	-0.0502939	0.272153	(-0.58, 0.48)	0.86
THICK_superiortemporal	cheese_overallfreq	Weighted mode	11	-0.0237276	0.229747	(-0.47, 0.43)	0.92
THICK_supramarginal	cheese_overallfreq	IVW(MRE)	20	0.141627	0.160247	(-0.17, 0.46)	0.38
THICK_supramarginal	cheese_overallfreq	MR Egger	20	0.69606	0.395263	(-0.08, 1.47)	0.1
THICK_supramarginal	cheese_overallfreq	Weighted median	20	0.0693063	0.195052	(-0.31, 0.45)	0.72
THICK_supramarginal	cheese_overallfreq	Simple mode	20	0.625362	0.471975	(-0.3, 1.55)	0.2
THICK_supramarginal	cheese_overallfreq	Weighted mode	20	-0.060854	0.430317	(-0.9, 0.78)	0.89
THICK_temporalpole	cheese_overallfreq	IVW(MRE)	6	0.0501628	0.109135	(-0.16, 0.26)	0.65
THICK_temporalpole	cheese_overallfreq	MR Egger	6	-0.012003	0.194929	(-0.39, 0.37)	0.95
THICK_temporalpole	cheese_overallfreq	Weighted median	6	-0.0647136	0.0915457	(-0.24, 0.11)	0.48
THICK_temporalpole	cheese_overallfreq	Simple mode	6	-0.0859258	0.128596	(-0.34, 0.17)	0.53
THICK_temporalpole	cheese_overallfreq	Weighted mode	6	-0.101629	0.100994	(-0.3, 0.1)	0.36
THICK_transversetemporal	cheese_overallfreq	IVW(MRE)	12	-0.00173247	0.0792696	(-0.16, 0.15)	0.98
THICK_transversetemporal	cheese_overallfreq	MR Egger	12	0.0529244	0.201081	(-0.34, 0.45)	0.8
THICK_transversetemporal	cheese_overallfreq	Weighted median	12	0.05846	0.104318	(-0.15, 0.26)	0.58
THICK_transversetemporal	cheese_overallfreq	Simple mode	12	0.203908	0.204856	(-0.2, 0.61)	0.34
THICK_transversetemporal	cheese_overallfreq	Weighted mode	12	0.150209	0.160705	(-0.16, 0.47)	0.37
SA_bankssts	coffee_cupsperday	IVW(MRE)	19	0.000353735	0.000227349	(0, 0)	0.12
SA_bankssts	coffee_cupsperday	MR Egger	19	0.000273548	0.000781211	(0, 0)	0.73
SA_bankssts	coffee_cupsperday	Weighted median	19	2.99727e-05	0.000136636	(0, 0)	0.83
SA_bankssts	coffee_cupsperday	Simple mode	19	-2.58925e-05	0.000222155	(0, 0)	0.91
SA_bankssts	coffee_cupsperday	Weighted mode	19	-3.78445e-05	0.000190164	(0, 0)	0.84
SA_caudalanteriorcingulate	coffee_cupsperday	IVW(MRE)	15	-0.000171014	0.00014106	(0, 0)	0.23
SA_caudalanteriorcingulate	coffee_cupsperday	MR Egger	15	0.000202152	0.000425783	(0, 0)	0.64
SA_caudalanteriorcingulate	coffee_cupsperday	Weighted median	15	-6.20731e-05	0.000166291	(0, 0)	0.71
SA_caudalanteriorcingulate	coffee_cupsperday	Simple mode	15	4.16085e-05	0.000278671	(0, 0)	0.88
SA_caudalanteriorcingulate	coffee_cupsperday	Weighted mode	15	9.73764e-05	0.000266669	(0, 0)	0.72
SA_caudalmiddlefrontal	coffee_cupsperday	IVW(MRE)	28	-1.468e-06	2.86381e-05	(0, 0)	0.96
SA_caudalmiddlefrontal	coffee_cupsperday	MR Egger	28	0.000115757	8.52955e-05	(0, 0)	0.19
SA_caudalmiddlefrontal	coffee_cupsperday	Weighted median	28	1.1447e-05	4.13419e-05	(0, 0)	0.78
SA_caudalmiddlefrontal	coffee_cupsperday	Simple mode	28	-5.54369e-05	7.20921e-05	(0, 0)	0.45
SA_caudalmiddlefrontal	coffee_cupsperday	Weighted mode	28	-2.01397e-05	7.16765e-05	(0, 0)	0.78
SA_cuneus	coffee_cupsperday	IVW(MRE)	23	-7.31777e-05	8.56243e-05	(0, 0)	0.39
SA_cuneus	coffee_cupsperday	MR Egger	23	-6.67148e-05	0.000304335	(0, 0)	0.83
SA_cuneus	coffee_cupsperday	Weighted median	23	-3.27511e-06	9.38721e-05	(0, 0)	0.97
SA_cuneus	coffee_cupsperday	Simple mode	23	0.000100499	0.000204991	(0, 0)	0.63
SA_cuneus	coffee_cupsperday	Weighted mode	23	0.000142918	0.000194778	(0, 0)	0.47
SA_entorhinal	coffee_cupsperday	IVW(MRE)	15	0.000133051	0.000195539	(0, 0)	0.5
SA_entorhinal	coffee_cupsperday	MR Egger	15	-0.000668648	0.000760517	(0, 0)	0.4
SA_entorhinal	coffee_cupsperday	Weighted median	15	-7.08186e-06	0.00025189	(0, 0)	0.98
SA_entorhinal	coffee_cupsperday	Simple mode	15	-0.000211573	0.000533163	(0, 0)	0.7
SA_entorhinal	coffee_cupsperday	Weighted mode	15	-0.000249311	0.000477534	(0, 0)	0.61
SA_frontalpole	coffee_cupsperday	IVW(MRE)	11	-0.000153072	0.00064269	(0, 0)	0.81
SA_frontalpole	coffee_cupsperday	MR Egger	11	0.00225707	0.00111996	(0, 0)	0.07
SA_frontalpole	coffee_cupsperday	Weighted median	11	1.54485e-05	0.000608946	(0, 0)	0.98
SA_frontalpole	coffee_cupsperday	Simple mode	11	-0.000447834	0.00110462	(0, 0)	0.69
SA_frontalpole	coffee_cupsperday	Weighted mode	11	1.77606e-05	0.000822731	(0, 0)	0.98
SA_fusiform	coffee_cupsperday	IVW(MRE)	19	-3.45449e-05	5.2826e-05	(0, 0)	0.51
SA_fusiform	coffee_cupsperday	MR Egger	19	0.000128765	0.000144943	(0, 0)	0.39
SA_fusiform	coffee_cupsperday	Weighted median	19	2.4489e-05	6.08879e-05	(0, 0)	0.69
SA_fusiform	coffee_cupsperday	Simple mode	19	7.26177e-05	0.000128303	(0, 0)	0.58
SA_fusiform	coffee_cupsperday	Weighted mode	19	6.0855e-05	0.000109398	(0, 0)	0.58
SA_inferiorparietal	coffee_cupsperday	IVW(MRE)	31	-3.18211e-06	1.74188e-05	(0, 0)	0.86
SA_inferiorparietal	coffee_cupsperday	MR Egger	31	-2.01353e-05	4.58125e-05	(0, 0)	0.66
SA_inferiorparietal	coffee_cupsperday	Weighted median	31	1.28521e-05	2.5208e-05	(0, 0)	0.61
SA_inferiorparietal	coffee_cupsperday	Simple mode	31	-7.64734e-07	5.2505e-05	(0, 0)	0.99
SA_inferiorparietal	coffee_cupsperday	Weighted mode	31	-3.68048e-06	5.15295e-05	(0, 0)	0.94
SA_inferiortemporal	coffee_cupsperday	IVW(MRE)	27	-5.1428e-05	2.66892e-05	(0, 0)	0.05
SA_inferiortemporal	coffee_cupsperday	MR Egger	27	7.18667e-05	9.22628e-05	(0, 0)	0.44
SA_inferiortemporal	coffee_cupsperday	Weighted median	27	-4.59933e-05	4.17776e-05	(0, 0)	0.27
SA_inferiortemporal	coffee_cupsperday	Simple mode	27	-0.000142449	8.34448e-05	(0, 0)	0.1
SA_inferiortemporal	coffee_cupsperday	Weighted mode	27	6.60811e-06	8.63224e-05	(0, 0)	0.94
SA_insula	coffee_cupsperday	IVW(MRE)	29	6.41295e-06	6.51863e-05	(0, 0)	0.92
SA_insula	coffee_cupsperday	MR Egger	29	9.7204e-05	0.000157362	(0, 0)	0.54
SA_insula	coffee_cupsperday	Weighted median	29	-8.16547e-06	7.42857e-05	(0, 0)	0.91
SA_insula	coffee_cupsperday	Simple mode	29	-0.000125524	0.000162701	(0, 0)	0.45
SA_insula	coffee_cupsperday	Weighted mode	29	-9.34625e-05	0.000145841	(0, 0)	0.53
SA_isthmuscingulate	coffee_cupsperday	IVW(MRE)	20	8.32176e-05	0.000106484	(0, 0)	0.43
SA_isthmuscingulate	coffee_cupsperday	MR Egger	20	0.00031509	0.000286165	(0, 0)	0.29
SA_isthmuscingulate	coffee_cupsperday	Weighted median	20	0.000130408	0.000120585	(0, 0)	0.28
SA_isthmuscingulate	coffee_cupsperday	Simple mode	20	1.43734e-05	0.000195058	(0, 0)	0.94
SA_isthmuscingulate	coffee_cupsperday	Weighted mode	20	3.64621e-05	0.000201561	(0, 0)	0.86
SA_lateraloccipital	coffee_cupsperday	IVW(MRE)	20	-0.000130387	7.91362e-05	(0, 0)	0.1
SA_lateraloccipital	coffee_cupsperday	MR Egger	20	3.81016e-05	0.000342959	(0, 0)	0.91
SA_lateraloccipital	coffee_cupsperday	Weighted median	20	-6.60906e-05	4.10286e-05	(0, 0)	0.11
SA_lateraloccipital	coffee_cupsperday	Simple mode	20	-0.000110903	7.86746e-05	(0, 0)	0.17
SA_lateraloccipital	coffee_cupsperday	Weighted mode	20	-9.35883e-05	7.52711e-05	(0, 0)	0.23
SA_lateralorbitofrontal	coffee_cupsperday	IVW(MRE)	24	4.99289e-05	6.6664e-05	(0, 0)	0.45
SA_lateralorbitofrontal	coffee_cupsperday	MR Egger	24	0.000136736	0.00026422	(0, 0)	0.61
SA_lateralorbitofrontal	coffee_cupsperday	Weighted median	24	9.07786e-05	7.47994e-05	(0, 0)	0.22
SA_lateralorbitofrontal	coffee_cupsperday	Simple mode	24	8.0188e-05	0.00013673	(0, 0)	0.56
SA_lateralorbitofrontal	coffee_cupsperday	Weighted mode	24	9.26499e-05	0.000114933	(0, 0)	0.43
SA_lingual	coffee_cupsperday	IVW(MRE)	39	-2.4532e-05	2.83803e-05	(0, 0)	0.39
SA_lingual	coffee_cupsperday	MR Egger	39	3.48596e-05	8.2978e-05	(0, 0)	0.68
SA_lingual	coffee_cupsperday	Weighted median	39	-9.15617e-05	3.3877e-05	(0, 0)	0.0069
SA_lingual	coffee_cupsperday	Simple mode	39	-0.000134268	8.09485e-05	(0, 0)	0.11
SA_lingual	coffee_cupsperday	Weighted mode	39	-0.000127452	7.47596e-05	(0, 0)	0.1
SA_medialorbitofrontal	coffee_cupsperday	IVW(MRE)	10	-2.50048e-05	7.4766e-05	(0, 0)	0.74
SA_medialorbitofrontal	coffee_cupsperday	MR Egger	10	-0.000258596	0.000263257	(0, 0)	0.35
SA_medialorbitofrontal	coffee_cupsperday	Weighted median	10	-0.000131397	0.000127529	(0, 0)	0.3
SA_medialorbitofrontal	coffee_cupsperday	Simple mode	10	-0.000164417	0.000189862	(0, 0)	0.41
SA_medialorbitofrontal	coffee_cupsperday	Weighted mode	10	-0.000164417	0.000189693	(0, 0)	0.41
SA_middletemporal	coffee_cupsperday	IVW(MRE)	22	5.05139e-05	4.85595e-05	(0, 0)	0.3
SA_middletemporal	coffee_cupsperday	MR Egger	22	-0.000112646	0.000146728	(0, 0)	0.45
SA_middletemporal	coffee_cupsperday	Weighted median	22	-9.20848e-06	6.35245e-05	(0, 0)	0.88
SA_middletemporal	coffee_cupsperday	Simple mode	22	0.000239267	0.00014987	(0, 0)	0.13
SA_middletemporal	coffee_cupsperday	Weighted mode	22	-0.00013738	0.000124981	(0, 0)	0.28
SA_paracentral	coffee_cupsperday	IVW(MRE)	26	-2.3233e-05	5.90917e-05	(0, 0)	0.69
SA_paracentral	coffee_cupsperday	MR Egger	26	3.46817e-05	0.000127039	(0, 0)	0.79
SA_paracentral	coffee_cupsperday	Weighted median	26	-7.54306e-05	7.92223e-05	(0, 0)	0.34
SA_paracentral	coffee_cupsperday	Simple mode	26	-0.000185538	0.000158699	(0, 0)	0.25
SA_paracentral	coffee_cupsperday	Weighted mode	26	-0.000168163	0.000170004	(0, 0)	0.33
SA_parahippocampal	coffee_cupsperday	IVW(MRE)	15	5.79301e-06	0.000214648	(0, 0)	0.98
SA_parahippocampal	coffee_cupsperday	MR Egger	15	-0.000729039	0.000413525	(0, 0)	0.1
SA_parahippocampal	coffee_cupsperday	Weighted median	15	-0.000353839	0.000222066	(0, 0)	0.11
SA_parahippocampal	coffee_cupsperday	Simple mode	15	-0.000502762	0.000402307	(0, 0)	0.23
SA_parahippocampal	coffee_cupsperday	Weighted mode	15	-0.000493554	0.00031854	(0, 0)	0.14
SA_parsopercularis	coffee_cupsperday	IVW(MRE)	20	0.000126418	7.67013e-05	(0, 0)	0.1
SA_parsopercularis	coffee_cupsperday	MR Egger	20	-3.37052e-05	0.000155909	(0, 0)	0.83
SA_parsopercularis	coffee_cupsperday	Weighted median	20	6.00333e-05	7.75576e-05	(0, 0)	0.44
SA_parsopercularis	coffee_cupsperday	Simple mode	20	9.15939e-06	0.000131976	(0, 0)	0.95
SA_parsopercularis	coffee_cupsperday	Weighted mode	20	1.90996e-05	0.000119039	(0, 0)	0.87
SA_parsorbitalis	coffee_cupsperday	IVW(MRE)	12	-8.84378e-05	0.000230366	(0, 0)	0.7
SA_parsorbitalis	coffee_cupsperday	MR Egger	12	-0.000223571	0.000927469	(0, 0)	0.81
SA_parsorbitalis	coffee_cupsperday	Weighted median	12	-0.000177923	0.000281568	(0, 0)	0.53
SA_parsorbitalis	coffee_cupsperday	Simple mode	12	-0.000243612	0.000450625	(0, 0)	0.6
SA_parsorbitalis	coffee_cupsperday	Weighted mode	12	-0.000234372	0.000441073	(0, 0)	0.61
SA_parstriangularis	coffee_cupsperday	IVW(MRE)	27	-9.91307e-05	4.68797e-05	(0, 0)	0.034
SA_parstriangularis	coffee_cupsperday	MR Egger	27	-8.35385e-05	0.000112183	(0, 0)	0.46
SA_parstriangularis	coffee_cupsperday	Weighted median	27	-0.000103799	6.61912e-05	(0, 0)	0.12
SA_parstriangularis	coffee_cupsperday	Simple mode	27	-0.000113283	0.000135932	(0, 0)	0.41
SA_parstriangularis	coffee_cupsperday	Weighted mode	27	-0.000151853	0.000129934	(0, 0)	0.25
SA_pericalcarine	coffee_cupsperday	IVW(MRE)	39	-3.13113e-06	4.16789e-05	(0, 0)	0.94
SA_pericalcarine	coffee_cupsperday	MR Egger	39	1.69356e-05	0.000129372	(0, 0)	0.9
SA_pericalcarine	coffee_cupsperday	Weighted median	39	3.10496e-05	5.02099e-05	(0, 0)	0.54
SA_pericalcarine	coffee_cupsperday	Simple mode	39	0.000135723	0.000120715	(0, 0)	0.27
SA_pericalcarine	coffee_cupsperday	Weighted mode	39	0.000124871	9.80994e-05	(0, 0)	0.21
SA_postcentral	coffee_cupsperday	IVW(MRE)	21	5.93013e-05	3.70839e-05	(0, 0)	0.11
SA_postcentral	coffee_cupsperday	MR Egger	21	0.000195978	8.19363e-05	(0, 0)	0.027
SA_postcentral	coffee_cupsperday	Weighted median	21	7.08733e-05	4.4964e-05	(0, 0)	0.11
SA_postcentral	coffee_cupsperday	Simple mode	21	6.23897e-05	7.48423e-05	(0, 0)	0.41
SA_postcentral	coffee_cupsperday	Weighted mode	21	7.89054e-05	4.85066e-05	(0, 0)	0.12
SA_posteriorcingulate	coffee_cupsperday	IVW(MRE)	24	-0.000287067	0.000101189	(0, 0)	0.0046
SA_posteriorcingulate	coffee_cupsperday	MR Egger	24	-0.000332064	0.000317294	(0, 0)	0.31
SA_posteriorcingulate	coffee_cupsperday	Weighted median	24	-0.000288669	0.000124591	(0, 0)	0.021
SA_posteriorcingulate	coffee_cupsperday	Simple mode	24	-0.000337913	0.000232289	(0, 0)	0.16
SA_posteriorcingulate	coffee_cupsperday	Weighted mode	24	-0.000337913	0.000215399	(0, 0)	0.13
SA_precentral	coffee_cupsperday	IVW(MRE)	25	3.84814e-05	2.77688e-05	(0, 0)	0.17
SA_precentral	coffee_cupsperday	MR Egger	25	6.61909e-05	4.57326e-05	(0, 0)	0.16
SA_precentral	coffee_cupsperday	Weighted median	25	3.91169e-05	3.12742e-05	(0, 0)	0.21
SA_precentral	coffee_cupsperday	Simple mode	25	5.8897e-05	7.25108e-05	(0, 0)	0.42
SA_precentral	coffee_cupsperday	Weighted mode	25	4.33019e-05	3.12164e-05	(0, 0)	0.18
SA_precuneus	coffee_cupsperday	IVW(MRE)	31	-2.81382e-05	3.6442e-05	(0, 0)	0.44
SA_precuneus	coffee_cupsperday	MR Egger	31	-0.000143253	8.49227e-05	(0, 0)	0.1
SA_precuneus	coffee_cupsperday	Weighted median	31	-3.35298e-05	4.00779e-05	(0, 0)	0.4
SA_precuneus	coffee_cupsperday	Simple mode	31	-2.30896e-05	7.90561e-05	(0, 0)	0.77
SA_precuneus	coffee_cupsperday	Weighted mode	31	-4.05197e-05	6.60542e-05	(0, 0)	0.54
SA_rostralanteriorcingulate	coffee_cupsperday	IVW(MRE)	16	1.50623e-05	0.000121299	(0, 0)	0.9
SA_rostralanteriorcingulate	coffee_cupsperday	MR Egger	16	-0.000103153	0.000247722	(0, 0)	0.68
SA_rostralanteriorcingulate	coffee_cupsperday	Weighted median	16	-2.89098e-05	0.000153002	(0, 0)	0.85
SA_rostralanteriorcingulate	coffee_cupsperday	Simple mode	16	7.63455e-05	0.00024887	(0, 0)	0.76
SA_rostralanteriorcingulate	coffee_cupsperday	Weighted mode	16	-1.89112e-05	0.000217398	(0, 0)	0.93
SA_rostralmiddlefrontal	coffee_cupsperday	IVW(MRE)	30	-3.98835e-05	2.33486e-05	(0, 0)	0.09
SA_rostralmiddlefrontal	coffee_cupsperday	MR Egger	30	-7.89653e-05	5.8116e-05	(0, 0)	0.19
SA_rostralmiddlefrontal	coffee_cupsperday	Weighted median	30	-3.372e-05	2.9371e-05	(0, 0)	0.25
SA_rostralmiddlefrontal	coffee_cupsperday	Simple mode	30	-2.12766e-05	6.10888e-05	(0, 0)	0.73
SA_rostralmiddlefrontal	coffee_cupsperday	Weighted mode	30	-4.5757e-05	4.86871e-05	(0, 0)	0.36
SA_superiorfrontal	coffee_cupsperday	IVW(MRE)	23	7.9002e-06	1.69493e-05	(0, 0)	0.64
SA_superiorfrontal	coffee_cupsperday	MR Egger	23	-3.95197e-05	5.75354e-05	(0, 0)	0.5
SA_superiorfrontal	coffee_cupsperday	Weighted median	23	9.89424e-06	3.10619e-05	(0, 0)	0.75
SA_superiorfrontal	coffee_cupsperday	Simple mode	23	-6.20252e-06	5.78825e-05	(0, 0)	0.92
SA_superiorfrontal	coffee_cupsperday	Weighted mode	23	8.33761e-06	5.41541e-05	(0, 0)	0.88
SA_superiorparietal	coffee_cupsperday	IVW(MRE)	28	3.19451e-05	2.20951e-05	(0, 0)	0.15
SA_superiorparietal	coffee_cupsperday	MR Egger	28	7.08412e-05	4.59642e-05	(0, 0)	0.14
SA_superiorparietal	coffee_cupsperday	Weighted median	28	2.83195e-05	2.72639e-05	(0, 0)	0.3
SA_superiorparietal	coffee_cupsperday	Simple mode	28	4.88035e-05	5.53089e-05	(0, 0)	0.39
SA_superiorparietal	coffee_cupsperday	Weighted mode	28	4.88035e-05	5.13782e-05	(0, 0)	0.35
SA_superiortemporal	coffee_cupsperday	IVW(MRE)	22	3.50439e-05	5.87747e-05	(0, 0)	0.55
SA_superiortemporal	coffee_cupsperday	MR Egger	22	-6.99966e-06	0.000178484	(0, 0)	0.97
SA_superiortemporal	coffee_cupsperday	Weighted median	22	7.19378e-05	6.30541e-05	(0, 0)	0.25
SA_superiortemporal	coffee_cupsperday	Simple mode	22	7.62288e-05	0.000123274	(0, 0)	0.54
SA_superiortemporal	coffee_cupsperday	Weighted mode	22	3.71814e-05	0.000124442	(0, 0)	0.77
SA_supramarginal	coffee_cupsperday	IVW(MRE)	24	2.2285e-05	2.57646e-05	(0, 0)	0.39
SA_supramarginal	coffee_cupsperday	MR Egger	24	1.27323e-05	6.15411e-05	(0, 0)	0.84
SA_supramarginal	coffee_cupsperday	Weighted median	24	-2.01028e-06	3.62193e-05	(0, 0)	0.96
SA_supramarginal	coffee_cupsperday	Simple mode	24	9.68669e-05	7.85706e-05	(0, 0)	0.23
SA_supramarginal	coffee_cupsperday	Weighted mode	24	-7.14964e-05	6.52618e-05	(0, 0)	0.28
SA_temporalpole	coffee_cupsperday	IVW(MRE)	15	2.87835e-05	0.000210237	(0, 0)	0.89
SA_temporalpole	coffee_cupsperday	MR Egger	15	0.000555983	0.000399176	(0, 0)	0.19
SA_temporalpole	coffee_cupsperday	Weighted median	15	-0.00013305	0.000325375	(0, 0)	0.68
SA_temporalpole	coffee_cupsperday	Simple mode	15	-0.000348284	0.00051857	(0, 0)	0.51
SA_temporalpole	coffee_cupsperday	Weighted mode	15	-0.000239408	0.000458637	(0, 0)	0.61
SA_transversetemporal	coffee_cupsperday	IVW(MRE)	35	0.000190958	0.000202626	(0, 0)	0.35
SA_transversetemporal	coffee_cupsperday	MR Egger	35	0.000283729	0.000492304	(0, 0)	0.57
SA_transversetemporal	coffee_cupsperday	Weighted median	35	0.000166716	0.000227747	(0, 0)	0.46
SA_transversetemporal	coffee_cupsperday	Simple mode	35	5.61963e-05	0.000447034	(0, 0)	0.9
SA_transversetemporal	coffee_cupsperday	Weighted mode	35	5.61963e-05	0.000447366	(0, 0)	0.9
THICK_bankssts	coffee_cupsperday	IVW(MRE)	12	0.0183372	0.116942	(-0.21, 0.25)	0.88
THICK_bankssts	coffee_cupsperday	MR Egger	12	0.0256245	0.30465	(-0.57, 0.62)	0.93
THICK_bankssts	coffee_cupsperday	Weighted median	12	0.0682591	0.149043	(-0.22, 0.36)	0.65
THICK_bankssts	coffee_cupsperday	Simple mode	12	0.13559	0.245092	(-0.34, 0.62)	0.59
THICK_bankssts	coffee_cupsperday	Weighted mode	12	0.121064	0.229843	(-0.33, 0.57)	0.61
THICK_caudalanteriorcingulate	coffee_cupsperday	IVW(MRE)	10	-0.0531416	0.0884974	(-0.23, 0.12)	0.55
THICK_caudalanteriorcingulate	coffee_cupsperday	MR Egger	10	0.109922	0.17076	(-0.22, 0.44)	0.54
THICK_caudalanteriorcingulate	coffee_cupsperday	Weighted median	10	-0.0660227	0.0919299	(-0.25, 0.11)	0.47
THICK_caudalanteriorcingulate	coffee_cupsperday	Simple mode	10	-0.133072	0.157099	(-0.44, 0.17)	0.42
THICK_caudalanteriorcingulate	coffee_cupsperday	Weighted mode	10	-0.0847221	0.147153	(-0.37, 0.2)	0.58
THICK_caudalmiddlefrontal	coffee_cupsperday	IVW(MRE)	12	0.16537	0.172051	(-0.17, 0.5)	0.34
THICK_caudalmiddlefrontal	coffee_cupsperday	MR Egger	12	0.119269	0.429793	(-0.72, 0.96)	0.79
THICK_caudalmiddlefrontal	coffee_cupsperday	Weighted median	12	0.0930674	0.201728	(-0.3, 0.49)	0.64
THICK_caudalmiddlefrontal	coffee_cupsperday	Simple mode	12	-0.0569401	0.377356	(-0.8, 0.68)	0.88
THICK_caudalmiddlefrontal	coffee_cupsperday	Weighted mode	12	-0.0569401	0.314674	(-0.67, 0.56)	0.86
THICK_cuneus	coffee_cupsperday	IVW(MRE)	8	0.118329	0.181671	(-0.24, 0.47)	0.51
THICK_cuneus	coffee_cupsperday	MR Egger	8	0.265868	0.43359	(-0.58, 1.12)	0.56
THICK_cuneus	coffee_cupsperday	Weighted median	8	0.181296	0.190671	(-0.19, 0.56)	0.34
THICK_cuneus	coffee_cupsperday	Simple mode	8	0.138799	0.343422	(-0.53, 0.81)	0.7
THICK_cuneus	coffee_cupsperday	Weighted mode	8	0.167348	0.308862	(-0.44, 0.77)	0.6
THICK_entorhinal	coffee_cupsperday	IVW(MRE)	9	0.116174	0.0734809	(-0.03, 0.26)	0.11
THICK_entorhinal	coffee_cupsperday	MR Egger	9	-0.105008	0.273304	(-0.64, 0.43)	0.71
THICK_entorhinal	coffee_cupsperday	Weighted median	9	0.0562261	0.0725566	(-0.09, 0.2)	0.44
THICK_entorhinal	coffee_cupsperday	Simple mode	9	0.0600824	0.0982524	(-0.13, 0.25)	0.56
THICK_entorhinal	coffee_cupsperday	Weighted mode	9	0.0646237	0.103768	(-0.14, 0.27)	0.55
THICK_frontalpole	coffee_cupsperday	IVW(MRE)	12	0.00868995	0.0525653	(-0.09, 0.11)	0.87
THICK_frontalpole	coffee_cupsperday	MR Egger	12	0.075819	0.118528	(-0.16, 0.31)	0.54
THICK_frontalpole	coffee_cupsperday	Weighted median	12	0.02972	0.0754161	(-0.12, 0.18)	0.69
THICK_frontalpole	coffee_cupsperday	Simple mode	12	0.013758	0.123321	(-0.23, 0.26)	0.91
THICK_frontalpole	coffee_cupsperday	Weighted mode	12	0.0370654	0.100002	(-0.16, 0.23)	0.72
THICK_fusiform	coffee_cupsperday	IVW(MRE)	8	-0.0161545	0.170546	(-0.35, 0.32)	0.92
THICK_fusiform	coffee_cupsperday	MR Egger	8	-0.492739	0.344497	(-1.17, 0.18)	0.2
THICK_fusiform	coffee_cupsperday	Weighted median	8	0.0933473	0.205131	(-0.31, 0.5)	0.65
THICK_fusiform	coffee_cupsperday	Simple mode	8	0.0920927	0.313599	(-0.52, 0.71)	0.78
THICK_fusiform	coffee_cupsperday	Weighted mode	8	0.109262	0.301174	(-0.48, 0.7)	0.73
THICK_inferiorparietal	coffee_cupsperday	IVW(MRE)	13	-0.281361	0.174443	(-0.62, 0.06)	0.11
THICK_inferiorparietal	coffee_cupsperday	MR Egger	13	0.71683	0.383427	(-0.03, 1.47)	0.09
THICK_inferiorparietal	coffee_cupsperday	Weighted median	13	-0.413464	0.224632	(-0.85, 0.03)	0.07
THICK_inferiorparietal	coffee_cupsperday	Simple mode	13	-0.407698	0.356435	(-1.11, 0.29)	0.28
THICK_inferiorparietal	coffee_cupsperday	Weighted mode	13	-0.385684	0.341483	(-1.05, 0.28)	0.28
THICK_inferiortemporal	coffee_cupsperday	IVW(MRE)	18	-0.168018	0.0872102	(-0.34, 0)	0.05
THICK_inferiortemporal	coffee_cupsperday	MR Egger	18	-0.136605	0.169632	(-0.47, 0.2)	0.43
THICK_inferiortemporal	coffee_cupsperday	Weighted median	18	-0.167854	0.12106	(-0.41, 0.07)	0.17
THICK_inferiortemporal	coffee_cupsperday	Simple mode	18	-0.112415	0.2341	(-0.57, 0.35)	0.64
THICK_inferiortemporal	coffee_cupsperday	Weighted mode	18	-0.152634	0.210587	(-0.57, 0.26)	0.48
THICK_insula	coffee_cupsperday	IVW(MRE)	14	0.12034	0.170558	(-0.21, 0.45)	0.48
THICK_insula	coffee_cupsperday	MR Egger	14	-0.240003	0.449457	(-1.12, 0.64)	0.6
THICK_insula	coffee_cupsperday	Weighted median	14	0.0075665	0.150056	(-0.29, 0.3)	0.96
THICK_insula	coffee_cupsperday	Simple mode	14	-0.0953679	0.224659	(-0.54, 0.34)	0.68
THICK_insula	coffee_cupsperday	Weighted mode	14	-0.0390234	0.182515	(-0.4, 0.32)	0.83
THICK_isthmuscingulate	coffee_cupsperday	IVW(MRE)	28	0.00481133	0.0581251	(-0.11, 0.12)	0.93
THICK_isthmuscingulate	coffee_cupsperday	MR Egger	28	-0.0418441	0.140229	(-0.32, 0.23)	0.77
THICK_isthmuscingulate	coffee_cupsperday	Weighted median	28	0.0358241	0.0744816	(-0.11, 0.18)	0.63
THICK_isthmuscingulate	coffee_cupsperday	Simple mode	28	0.0613612	0.140499	(-0.21, 0.34)	0.67
THICK_isthmuscingulate	coffee_cupsperday	Weighted mode	28	0.0521223	0.14126	(-0.22, 0.33)	0.72
THICK_lateraloccipital	coffee_cupsperday	IVW(MRE)	13	-0.475018	0.117768	(-0.71, -0.24)	5.5e-05
THICK_lateraloccipital	coffee_cupsperday	MR Egger	13	-0.390559	0.277669	(-0.93, 0.15)	0.19
THICK_lateraloccipital	coffee_cupsperday	Weighted median	13	-0.407478	0.187281	(-0.77, -0.04)	0.03
THICK_lateraloccipital	coffee_cupsperday	Simple mode	13	-0.510442	0.312535	(-1.12, 0.1)	0.13
THICK_lateraloccipital	coffee_cupsperday	Weighted mode	13	-0.441456	0.285501	(-1, 0.12)	0.15
THICK_lateralorbitofrontal	coffee_cupsperday	IVW(MRE)	7	-0.290107	0.0821928	(-0.45, -0.13)	0.00042
THICK_lateralorbitofrontal	coffee_cupsperday	MR Egger	7	-0.307445	0.218822	(-0.74, 0.12)	0.22
THICK_lateralorbitofrontal	coffee_cupsperday	Weighted median	7	-0.224894	0.17605	(-0.57, 0.12)	0.2
THICK_lateralorbitofrontal	coffee_cupsperday	Simple mode	7	-0.229036	0.252479	(-0.72, 0.27)	0.4
THICK_lateralorbitofrontal	coffee_cupsperday	Weighted mode	7	-0.202836	0.20644	(-0.61, 0.2)	0.36
THICK_lingual	coffee_cupsperday	IVW(MRE)	14	-0.175836	0.179145	(-0.53, 0.18)	0.33
THICK_lingual	coffee_cupsperday	MR Egger	14	-0.475608	0.499036	(-1.45, 0.5)	0.36
THICK_lingual	coffee_cupsperday	Weighted median	14	-0.144934	0.183359	(-0.5, 0.21)	0.43
THICK_lingual	coffee_cupsperday	Simple mode	14	-0.092102	0.27291	(-0.63, 0.44)	0.74
THICK_lingual	coffee_cupsperday	Weighted mode	14	-0.092102	0.264348	(-0.61, 0.43)	0.73
THICK_medialorbitofrontal	coffee_cupsperday	IVW(MRE)	14	0.0720752	0.0929976	(-0.11, 0.25)	0.44
THICK_medialorbitofrontal	coffee_cupsperday	MR Egger	14	0.172809	0.269047	(-0.35, 0.7)	0.53
THICK_medialorbitofrontal	coffee_cupsperday	Weighted median	14	0.0943497	0.120204	(-0.14, 0.33)	0.43
THICK_medialorbitofrontal	coffee_cupsperday	Simple mode	14	0.142659	0.194301	(-0.24, 0.52)	0.48
THICK_medialorbitofrontal	coffee_cupsperday	Weighted mode	14	0.132579	0.196938	(-0.25, 0.52)	0.51
THICK_middletemporal	coffee_cupsperday	IVW(MRE)	10	0.160265	0.0806521	(0, 0.32)	0.047
THICK_middletemporal	coffee_cupsperday	MR Egger	10	-0.0981424	0.294018	(-0.67, 0.48)	0.75
THICK_middletemporal	coffee_cupsperday	Weighted median	10	0.153654	0.174213	(-0.19, 0.5)	0.38
THICK_middletemporal	coffee_cupsperday	Simple mode	10	0.37241	0.271529	(-0.16, 0.9)	0.2
THICK_middletemporal	coffee_cupsperday	Weighted mode	10	0.378201	0.2831	(-0.18, 0.93)	0.21
THICK_paracentral	coffee_cupsperday	IVW(MRE)	14	0.0582572	0.148424	(-0.23, 0.35)	0.69
THICK_paracentral	coffee_cupsperday	MR Egger	14	0.252678	0.322506	(-0.38, 0.88)	0.45
THICK_paracentral	coffee_cupsperday	Weighted median	14	0.079696	0.152041	(-0.22, 0.38)	0.6
THICK_paracentral	coffee_cupsperday	Simple mode	14	0.037222	0.23301	(-0.42, 0.49)	0.88
THICK_paracentral	coffee_cupsperday	Weighted mode	14	0.0508972	0.197089	(-0.34, 0.44)	0.8
THICK_parahippocampal	coffee_cupsperday	IVW(MRE)	26	-0.0276124	0.0479888	(-0.12, 0.07)	0.57
THICK_parahippocampal	coffee_cupsperday	MR Egger	26	-0.0294436	0.11144	(-0.25, 0.19)	0.79
THICK_parahippocampal	coffee_cupsperday	Weighted median	26	0.000660827	0.0515821	(-0.1, 0.1)	0.99
THICK_parahippocampal	coffee_cupsperday	Simple mode	26	0.00821565	0.089915	(-0.17, 0.18)	0.93
THICK_parahippocampal	coffee_cupsperday	Weighted mode	26	0.00491922	0.0696786	(-0.13, 0.14)	0.94
THICK_parsopercularis	coffee_cupsperday	IVW(MRE)	16	0.0234429	0.163985	(-0.3, 0.34)	0.89
THICK_parsopercularis	coffee_cupsperday	MR Egger	16	-0.630725	0.391136	(-1.4, 0.14)	0.13
THICK_parsopercularis	coffee_cupsperday	Weighted median	16	-0.0321519	0.184943	(-0.39, 0.33)	0.86
THICK_parsopercularis	coffee_cupsperday	Simple mode	16	-0.399301	0.432556	(-1.25, 0.45)	0.37
THICK_parsopercularis	coffee_cupsperday	Weighted mode	16	-0.415234	0.369069	(-1.14, 0.31)	0.28
THICK_parsorbitalis	coffee_cupsperday	IVW(MRE)	12	-0.0548219	0.0971407	(-0.25, 0.14)	0.57
THICK_parsorbitalis	coffee_cupsperday	MR Egger	12	0.0525811	0.199905	(-0.34, 0.44)	0.8
THICK_parsorbitalis	coffee_cupsperday	Weighted median	12	-0.0336938	0.117185	(-0.26, 0.2)	0.77
THICK_parsorbitalis	coffee_cupsperday	Simple mode	12	-0.0310462	0.211438	(-0.45, 0.38)	0.89
THICK_parsorbitalis	coffee_cupsperday	Weighted mode	12	0.0476256	0.172828	(-0.29, 0.39)	0.79
THICK_parstriangularis	coffee_cupsperday	IVW(MRE)	18	0.064377	0.127013	(-0.18, 0.31)	0.61
THICK_parstriangularis	coffee_cupsperday	MR Egger	18	0.162896	0.289051	(-0.4, 0.73)	0.58
THICK_parstriangularis	coffee_cupsperday	Weighted median	18	0.0242562	0.148564	(-0.27, 0.32)	0.87
THICK_parstriangularis	coffee_cupsperday	Simple mode	18	-0.0679346	0.259259	(-0.58, 0.44)	0.8
THICK_parstriangularis	coffee_cupsperday	Weighted mode	18	-0.0606575	0.238441	(-0.53, 0.41)	0.8
THICK_pericalcarine	coffee_cupsperday	IVW(MRE)	18	0.0138905	0.0863525	(-0.16, 0.18)	0.87
THICK_pericalcarine	coffee_cupsperday	MR Egger	18	-0.134243	0.287276	(-0.7, 0.43)	0.65
THICK_pericalcarine	coffee_cupsperday	Weighted median	18	0.0155364	0.134494	(-0.25, 0.28)	0.91
THICK_pericalcarine	coffee_cupsperday	Simple mode	18	0.0494712	0.255802	(-0.45, 0.55)	0.85
THICK_pericalcarine	coffee_cupsperday	Weighted mode	18	0.0494712	0.262474	(-0.46, 0.56)	0.85
THICK_postcentral	coffee_cupsperday	IVW(MRE)	24	0.0428462	0.101932	(-0.16, 0.24)	0.67
THICK_postcentral	coffee_cupsperday	MR Egger	24	0.150361	0.19892	(-0.24, 0.54)	0.46
THICK_postcentral	coffee_cupsperday	Weighted median	24	0.16102	0.133422	(-0.1, 0.42)	0.23
THICK_postcentral	coffee_cupsperday	Simple mode	24	-0.0295395	0.258999	(-0.54, 0.48)	0.91
THICK_postcentral	coffee_cupsperday	Weighted mode	24	0.147775	0.150252	(-0.15, 0.44)	0.34
THICK_posteriorcingulate	coffee_cupsperday	IVW(MRE)	13	-0.151613	0.111124	(-0.37, 0.07)	0.17
THICK_posteriorcingulate	coffee_cupsperday	MR Egger	13	-0.930834	0.37298	(-1.66, -0.2)	0.03
THICK_posteriorcingulate	coffee_cupsperday	Weighted median	13	-0.162082	0.1414	(-0.44, 0.12)	0.25
THICK_posteriorcingulate	coffee_cupsperday	Simple mode	13	-0.177207	0.249017	(-0.67, 0.31)	0.49
THICK_posteriorcingulate	coffee_cupsperday	Weighted mode	13	-0.154804	0.241242	(-0.63, 0.32)	0.53
THICK_precentral	coffee_cupsperday	IVW(MRE)	14	-0.222628	0.138351	(-0.49, 0.05)	0.11
THICK_precentral	coffee_cupsperday	MR Egger	14	-0.0121888	0.387176	(-0.77, 0.75)	0.98
THICK_precentral	coffee_cupsperday	Weighted median	14	-0.11896	0.178119	(-0.47, 0.23)	0.5
THICK_precentral	coffee_cupsperday	Simple mode	14	-0.103781	0.273473	(-0.64, 0.43)	0.71
THICK_precentral	coffee_cupsperday	Weighted mode	14	-0.0963037	0.208146	(-0.5, 0.31)	0.65
THICK_precuneus	coffee_cupsperday	IVW(MRE)	20	-0.102326	0.194905	(-0.48, 0.28)	0.6
THICK_precuneus	coffee_cupsperday	MR Egger	20	-0.0555625	0.476896	(-0.99, 0.88)	0.91
THICK_precuneus	coffee_cupsperday	Weighted median	20	0.140556	0.193517	(-0.24, 0.52)	0.47
[truncated: 5,722 more rows]

## Sheet: Global
Supplementary Table 5.2 result of MR estimates for the association between the global cortex and food type.
exposure	outcome	method	nSNP	beta	se	95%CI	pvalue
Full_SurfArea	Carbohydrate	IVW(MRE)	35	3.02964e-07	8.65903e-07	(0, 0)	0.73
Full_SurfArea	Carbohydrate	MR Egger	35	1.51996e-06	2.75636e-06	(0, 0)	0.59
Full_SurfArea	Carbohydrate	Weighted median	35	7.33711e-07	1.03913e-06	(0, 0)	0.48
Full_SurfArea	Carbohydrate	Simple mode	35	2.51675e-06	2.30606e-06	(0, 0)	0.28
Full_SurfArea	Carbohydrate	Weighted mode	35	1.46588e-06	2.15161e-06	(0, 0)	0.5
Full_SurfArea	Fat	IVW(MRE)	35	-1.13539e-06	8.02369e-07	(0, 0)	0.16
Full_SurfArea	Fat	MR Egger	35	1.66842e-06	2.50962e-06	(0, 0)	0.51
Full_SurfArea	Fat	Weighted median	35	-1.50412e-06	1.01002e-06	(0, 0)	0.14
Full_SurfArea	Fat	Simple mode	35	-4.02813e-06	2.68207e-06	(0, 0)	0.14
Full_SurfArea	Fat	Weighted mode	35	-3.40701e-06	2.45164e-06	(0, 0)	0.17
Full_SurfArea	Protein	IVW(MRE)	35	1.81797e-07	6.88753e-07	(0, 0)	0.79
Full_SurfArea	Protein	MR Egger	35	-3.57422e-07	2.19717e-06	(0, 0)	0.87
Full_SurfArea	Protein	Weighted median	35	-1.52346e-07	9.73338e-07	(0, 0)	0.88
Full_SurfArea	Protein	Simple mode	35	2.2473e-07	2.09503e-06	(0, 0)	0.92
Full_SurfArea	Protein	Weighted mode	35	-3.64601e-07	1.81134e-06	(0, 0)	0.84
Full_SurfArea	Sugar	IVW(MRE)	35	1.39625e-06	8.57933e-07	(0, 0)	0.1
Full_SurfArea	Sugar	MR Egger	35	-2.10413e-06	2.57344e-06	(0, 0)	0.42
Full_SurfArea	Sugar	Weighted median	35	2.7659e-06	1.09685e-06	(0, 0)	0.012
Full_SurfArea	Sugar	Simple mode	35	3.98136e-06	2.40677e-06	(0, 0)	0.11
Full_SurfArea	Sugar	Weighted mode	35	3.73709e-06	2.32091e-06	(0, 0)	0.12
Full_Thickness	Carbohydrate	IVW(MRE)	24	0.0474353	0.158962	(-0.26, 0.36)	0.77
Full_Thickness	Carbohydrate	MR Egger	24	0.505669	0.46672	(-0.41, 1.42)	0.29
Full_Thickness	Carbohydrate	Weighted median	24	0.0752835	0.188142	(-0.29, 0.44)	0.69
Full_Thickness	Carbohydrate	Simple mode	24	0.00788782	0.336392	(-0.65, 0.67)	0.98
Full_Thickness	Carbohydrate	Weighted mode	24	0.0178428	0.338291	(-0.65, 0.68)	0.96
Full_Thickness	Fat	IVW(MRE)	24	0.168066	0.160256	(-0.15, 0.48)	0.29
Full_Thickness	Fat	MR Egger	24	-0.682505	0.441628	(-1.55, 0.18)	0.14
Full_Thickness	Fat	Weighted median	24	0.261366	0.192035	(-0.12, 0.64)	0.17
Full_Thickness	Fat	Simple mode	24	0.364252	0.421873	(-0.46, 1.19)	0.4
Full_Thickness	Fat	Weighted mode	24	0.364252	0.424123	(-0.47, 1.2)	0.4
Full_Thickness	Protein	IVW(MRE)	24	-0.00386159	0.140222	(-0.28, 0.27)	0.98
Full_Thickness	Protein	MR Egger	24	0.602127	0.39875	(-0.18, 1.38)	0.15
Full_Thickness	Protein	Weighted median	24	0.134557	0.172422	(-0.2, 0.47)	0.44
Full_Thickness	Protein	Simple mode	24	0.208137	0.332085	(-0.44, 0.86)	0.54
Full_Thickness	Protein	Weighted mode	24	0.217114	0.335446	(-0.44, 0.87)	0.52
Full_Thickness	Sugar	IVW(MRE)	24	0.135632	0.13614	(-0.13, 0.4)	0.32
Full_Thickness	Sugar	MR Egger	24	0.518134	0.38832	(-0.24, 1.28)	0.2
Full_Thickness	Sugar	Weighted median	24	0.0368797	0.191844	(-0.34, 0.41)	0.85
Full_Thickness	Sugar	Simple mode	24	-0.206004	0.424341	(-1.04, 0.63)	0.63
Full_Thickness	Sugar	Weighted mode	24	-0.180605	0.409662	(-0.98, 0.62)	0.66
Full_SurfArea	alcohol_overallfreq	IVW(MRE)	6	5.52327e-06	1.85668e-06	(0, 0)	0.0029
Full_SurfArea	alcohol_overallfreq	MR Egger	6	1.20844e-05	7.41303e-06	(0, 0)	0.18
Full_SurfArea	alcohol_overallfreq	Weighted median	6	5.65742e-06	1.31881e-06	(0, 0)	1.8e-05
Full_SurfArea	alcohol_overallfreq	Simple mode	6	6.97768e-07	4.58339e-06	(0, 0)	0.88
Full_SurfArea	alcohol_overallfreq	Weighted mode	6	8.8002e-06	4.15002e-06	(0, 0)	0.09
Full_SurfArea	anyalcohol_glassespermonth	IVW(MRE)	6	5.99727e-06	2.62735e-06	(0, 0)	0.022
Full_SurfArea	anyalcohol_glassespermonth	MR Egger	6	1.61139e-05	1.02819e-05	(0, 0)	0.19
Full_SurfArea	anyalcohol_glassespermonth	Weighted median	6	2.92083e-06	1.50745e-06	(0, 0)	0.05
Full_SurfArea	anyalcohol_glassespermonth	Simple mode	6	4.57164e-07	2.58533e-06	(0, 0)	0.87
Full_SurfArea	anyalcohol_glassespermonth	Weighted mode	6	-3.84582e-08	1.80986e-06	(0, 0)	0.98
Full_SurfArea	beef_overallfreq	IVW(MRE)	6	-1.04883e-07	1.16523e-06	(0, 0)	0.93
Full_SurfArea	beef_overallfreq	MR Egger	6	6.03419e-06	4.01208e-06	(0, 0)	0.21
Full_SurfArea	beef_overallfreq	Weighted median	6	1.09562e-07	1.20219e-06	(0, 0)	0.93
Full_SurfArea	beef_overallfreq	Simple mode	6	-2.06105e-06	2.11555e-06	(0, 0)	0.37
Full_SurfArea	beef_overallfreq	Weighted mode	6	4.36816e-07	1.8249e-06	(0, 0)	0.82
Full_SurfArea	cereal_bowlsperweek	IVW(MRE)	6	-1.79003e-06	1.87609e-06	(0, 0)	0.34
Full_SurfArea	cereal_bowlsperweek	MR Egger	6	-1.0212e-05	6.99201e-06	(0, 0)	0.22
Full_SurfArea	cereal_bowlsperweek	Weighted median	6	-5.94869e-07	1.37538e-06	(0, 0)	0.67
Full_SurfArea	cereal_bowlsperweek	Simple mode	6	1.18348e-06	1.78199e-06	(0, 0)	0.54
Full_SurfArea	cereal_bowlsperweek	Weighted mode	6	1.37177e-06	2.0827e-06	(0, 0)	0.54
Full_SurfArea	cheese_overallfreq	IVW(MRE)	6	1.70098e-06	2.27439e-06	(0, 0)	0.45
Full_SurfArea	cheese_overallfreq	MR Egger	6	-1.11849e-05	7.43975e-06	(0, 0)	0.21
Full_SurfArea	cheese_overallfreq	Weighted median	6	3.67696e-06	1.53048e-06	(0, 0)	0.016
Full_SurfArea	cheese_overallfreq	Simple mode	6	5.8975e-06	1.65444e-06	(0, 0)	0.016
Full_SurfArea	cheese_overallfreq	Weighted mode	6	5.85494e-06	1.7875e-06	(0, 0)	0.022
Full_SurfArea	coffee_cupsperday	IVW(MRE)	6	6.71358e-07	2.35373e-06	(0, 0)	0.78
Full_SurfArea	coffee_cupsperday	MR Egger	6	-4.62289e-06	9.96537e-06	(0, 0)	0.67
Full_SurfArea	coffee_cupsperday	Weighted median	6	-8.50167e-07	1.25858e-06	(0, 0)	0.5
Full_SurfArea	coffee_cupsperday	Simple mode	6	4.14442e-07	1.56721e-06	(0, 0)	0.8
Full_SurfArea	coffee_cupsperday	Weighted mode	6	-5.11141e-07	1.17334e-06	(0, 0)	0.68
Full_SurfArea	cookedveg_TBSperday	IVW(MRE)	6	8.95659e-07	1.62478e-06	(0, 0)	0.58
Full_SurfArea	cookedveg_TBSperday	MR Egger	6	-9.40022e-06	4.74926e-06	(0, 0)	0.12
Full_SurfArea	cookedveg_TBSperday	Weighted median	6	8.07865e-08	1.157e-06	(0, 0)	0.94
Full_SurfArea	cookedveg_TBSperday	Simple mode	6	4.38568e-07	1.30539e-06	(0, 0)	0.75
Full_SurfArea	cookedveg_TBSperday	Weighted mode	6	2.0546e-07	1.22263e-06	(0, 0)	0.87
Full_SurfArea	doyouaddsalt	IVW(MRE)	6	-1.13794e-06	1.75852e-06	(0, 0)	0.52
Full_SurfArea	doyouaddsalt	MR Egger	6	-3.98694e-06	7.57957e-06	(0, 0)	0.63
Full_SurfArea	doyouaddsalt	Weighted median	6	-7.04324e-07	1.23097e-06	(0, 0)	0.57
Full_SurfArea	doyouaddsalt	Simple mode	6	2.521e-07	2.01095e-06	(0, 0)	0.91
Full_SurfArea	doyouaddsalt	Weighted mode	6	-5.57478e-07	1.37156e-06	(0, 0)	0.7
Full_SurfArea	freshfruit_piecesperday	IVW(MRE)	6	1.30423e-06	3.26347e-06	(0, 0)	0.69
Full_SurfArea	freshfruit_piecesperday	MR Egger	6	-2.56801e-05	3.32234e-06	(0, 0)	0.0015
Full_SurfArea	freshfruit_piecesperday	Weighted median	6	6.92282e-07	1.35426e-06	(0, 0)	0.61
Full_SurfArea	freshfruit_piecesperday	Simple mode	6	3.00669e-06	1.57137e-06	(0, 0)	0.11
Full_SurfArea	freshfruit_piecesperday	Weighted mode	6	1.62616e-06	2.35126e-06	(0, 0)	0.52
Full_SurfArea	hotdrinktemp	IVW(MRE)	6	6.3386e-08	1.85946e-06	(0, 0)	0.97
Full_SurfArea	hotdrinktemp	MR Egger	6	-9.76568e-06	6.38977e-06	(0, 0)	0.2
Full_SurfArea	hotdrinktemp	Weighted median	6	1.64629e-06	1.36338e-06	(0, 0)	0.23
Full_SurfArea	hotdrinktemp	Simple mode	6	2.06311e-06	2.2965e-06	(0, 0)	0.41
Full_SurfArea	hotdrinktemp	Weighted mode	6	2.2611e-06	3.02955e-06	(0, 0)	0.49
Full_SurfArea	lambmutton_overallfreq	IVW(MRE)	6	2.74431e-06	1.60735e-06	(0, 0)	0.09
Full_SurfArea	lambmutton_overallfreq	MR Egger	6	8.15838e-06	6.4781e-06	(0, 0)	0.28
Full_SurfArea	lambmutton_overallfreq	Weighted median	6	3.23803e-06	1.33452e-06	(0, 0)	0.015
Full_SurfArea	lambmutton_overallfreq	Simple mode	6	3.52268e-06	2.41845e-06	(0, 0)	0.21
Full_SurfArea	lambmutton_overallfreq	Weighted mode	6	4.72046e-06	1.58054e-06	(0, 0)	0.031
Full_SurfArea	milk_typeused_bin5	IVW(MRE)	6	1.88728e-07	9.82999e-07	(0, 0)	0.85
Full_SurfArea	milk_typeused_bin5	MR Egger	6	4.86011e-07	4.31305e-06	(0, 0)	0.92
Full_SurfArea	milk_typeused_bin5	Weighted median	6	5.23092e-07	7.68425e-07	(0, 0)	0.5
Full_SurfArea	milk_typeused_bin5	Simple mode	6	1.92235e-06	1.39241e-06	(0, 0)	0.23
Full_SurfArea	milk_typeused_bin5	Weighted mode	6	9.48792e-07	1.10092e-06	(0, 0)	0.43
Full_SurfArea	milk_typeused_bin9	IVW(MRE)	6	-9.04141e-07	1.13889e-06	(0, 0)	0.43
Full_SurfArea	milk_typeused_bin9	MR Egger	6	4.25678e-06	4.22883e-06	(0, 0)	0.37
Full_SurfArea	milk_typeused_bin9	Weighted median	6	3.52994e-08	1.17655e-06	(0, 0)	0.98
Full_SurfArea	milk_typeused_bin9	Simple mode	6	2.37908e-07	1.77519e-06	(0, 0)	0.9
Full_SurfArea	milk_typeused_bin9	Weighted mode	6	3.52055e-07	1.24995e-06	(0, 0)	0.79
Full_SurfArea	nonoilyfish_overallfreq	IVW(MRE)	6	-5.85809e-07	1.89067e-06	(0, 0)	0.76
Full_SurfArea	nonoilyfish_overallfreq	MR Egger	6	-9.92401e-06	6.7519e-06	(0, 0)	0.22
Full_SurfArea	nonoilyfish_overallfreq	Weighted median	6	-3.1559e-06	1.21108e-06	(0, 0)	0.0092
Full_SurfArea	nonoilyfish_overallfreq	Simple mode	6	-3.09858e-06	1.60502e-06	(0, 0)	0.11
Full_SurfArea	nonoilyfish_overallfreq	Weighted mode	6	-3.15605e-06	1.1684e-06	(0, 0)	0.043
Full_SurfArea	oilyfish_overallfreq	IVW(MRE)	6	5.82971e-06	2.57707e-06	(0, 0)	0.024
Full_SurfArea	oilyfish_overallfreq	MR Egger	6	-1.74354e-06	1.06173e-05	(0, 0)	0.88
Full_SurfArea	oilyfish_overallfreq	Weighted median	6	5.54912e-06	1.36429e-06	(0, 0)	4.8e-05
Full_SurfArea	oilyfish_overallfreq	Simple mode	6	7.26995e-06	1.90367e-06	(0, 0)	0.012
Full_SurfArea	oilyfish_overallfreq	Weighted mode	6	6.70697e-06	1.70417e-06	(0, 0)	0.011
Full_SurfArea	pork_overallfreq	IVW(MRE)	6	2.1094e-08	1.59684e-06	(0, 0)	0.99
Full_SurfArea	pork_overallfreq	MR Egger	6	1.94154e-06	6.94035e-06	(0, 0)	0.79
Full_SurfArea	pork_overallfreq	Weighted median	6	1.57931e-06	1.20082e-06	(0, 0)	0.19
Full_SurfArea	pork_overallfreq	Simple mode	6	1.71892e-06	1.46812e-06	(0, 0)	0.29
Full_SurfArea	pork_overallfreq	Weighted mode	6	2.0405e-06	1.23951e-06	(0, 0)	0.16
Full_SurfArea	rawveg_TBSperday	IVW(MRE)	6	3.9805e-06	2.2919e-06	(0, 0)	0.08
Full_SurfArea	rawveg_TBSperday	MR Egger	6	-2.07517e-06	9.56408e-06	(0, 0)	0.84
Full_SurfArea	rawveg_TBSperday	Weighted median	6	2.63635e-06	1.31037e-06	(0, 0)	0.044
Full_SurfArea	rawveg_TBSperday	Simple mode	6	-3.65258e-07	2.88175e-06	(0, 0)	0.9
Full_SurfArea	rawveg_TBSperday	Weighted mode	6	5.86901e-06	2.91116e-06	(0, 0)	0.1
Full_SurfArea	tea_cupsperday	IVW(MRE)	6	5.99386e-07	8.87607e-07	(0, 0)	0.5
Full_SurfArea	tea_cupsperday	MR Egger	6	-2.52891e-07	3.8724e-06	(0, 0)	0.95
Full_SurfArea	tea_cupsperday	Weighted median	6	1.0395e-07	1.12349e-06	(0, 0)	0.93
Full_SurfArea	tea_cupsperday	Simple mode	6	-9.93492e-07	1.77731e-06	(0, 0)	0.6
Full_SurfArea	tea_cupsperday	Weighted mode	6	-9.71299e-07	1.60061e-06	(0, 0)	0.57
Full_SurfArea	water_glassesperday	IVW(MRE)	6	-8.48439e-07	2.88258e-06	(0, 0)	0.77
Full_SurfArea	water_glassesperday	MR Egger	6	-2.47603e-05	3.32225e-06	(0, 0)	0.0017
Full_SurfArea	water_glassesperday	Weighted median	6	1.05209e-06	1.48213e-06	(0, 0)	0.48
Full_SurfArea	water_glassesperday	Simple mode	6	2.78199e-06	2.12119e-06	(0, 0)	0.25
Full_SurfArea	water_glassesperday	Weighted mode	6	2.62022e-06	2.13719e-06	(0, 0)	0.27
Full_Thickness	alcohol_overallfreq	IVW(MRE)	29	-0.293979	0.166636	(-0.62, 0.03)	0.08
Full_Thickness	alcohol_overallfreq	MR Egger	29	-0.148582	0.505067	(-1.14, 0.84)	0.77
Full_Thickness	alcohol_overallfreq	Weighted median	29	-0.0379059	0.138675	(-0.31, 0.23)	0.78
Full_Thickness	alcohol_overallfreq	Simple mode	29	0.136978	0.243095	(-0.34, 0.61)	0.58
Full_Thickness	alcohol_overallfreq	Weighted mode	29	0.172172	0.232493	(-0.28, 0.63)	0.47
Full_Thickness	anyalcohol_glassespermonth	IVW(MRE)	29	-0.408865	0.194116	(-0.79, -0.03)	0.035
Full_Thickness	anyalcohol_glassespermonth	MR Egger	29	-0.221927	0.588167	(-1.37, 0.93)	0.71
Full_Thickness	anyalcohol_glassespermonth	Weighted median	29	-0.0277339	0.132674	(-0.29, 0.23)	0.83
Full_Thickness	anyalcohol_glassespermonth	Simple mode	29	0.0421854	0.234426	(-0.42, 0.5)	0.86
Full_Thickness	anyalcohol_glassespermonth	Weighted mode	29	0.0679043	0.226583	(-0.38, 0.51)	0.77
Full_Thickness	beef_overallfreq	IVW(MRE)	29	-0.0999962	0.127503	(-0.35, 0.15)	0.43
Full_Thickness	beef_overallfreq	MR Egger	29	0.0155405	0.3865	(-0.74, 0.77)	0.97
Full_Thickness	beef_overallfreq	Weighted median	29	-0.10577	0.123094	(-0.35, 0.14)	0.39
Full_Thickness	beef_overallfreq	Simple mode	29	-0.298056	0.235431	(-0.76, 0.16)	0.22
Full_Thickness	beef_overallfreq	Weighted mode	29	-0.263454	0.219413	(-0.69, 0.17)	0.24
Full_Thickness	cereal_bowlsperweek	IVW(MRE)	29	0.0467101	0.120542	(-0.19, 0.28)	0.7
Full_Thickness	cereal_bowlsperweek	MR Egger	29	-0.227207	0.361723	(-0.94, 0.48)	0.54
Full_Thickness	cereal_bowlsperweek	Weighted median	29	-0.115943	0.125394	(-0.36, 0.13)	0.36
Full_Thickness	cereal_bowlsperweek	Simple mode	29	-0.151187	0.230867	(-0.6, 0.3)	0.52
Full_Thickness	cereal_bowlsperweek	Weighted mode	29	-0.16691	0.221095	(-0.6, 0.27)	0.46
Full_Thickness	cheese_overallfreq	IVW(MRE)	29	0.15317	0.1243	(-0.09, 0.4)	0.22
Full_Thickness	cheese_overallfreq	MR Egger	29	0.109247	0.377287	(-0.63, 0.85)	0.77
Full_Thickness	cheese_overallfreq	Weighted median	29	0.119582	0.122013	(-0.12, 0.36)	0.33
Full_Thickness	cheese_overallfreq	Simple mode	29	0.0872845	0.228337	(-0.36, 0.53)	0.71
Full_Thickness	cheese_overallfreq	Weighted mode	29	0.0666831	0.227917	(-0.38, 0.51)	0.77
Full_Thickness	coffee_cupsperday	IVW(MRE)	29	-0.0819839	0.120396	(-0.32, 0.15)	0.5
Full_Thickness	coffee_cupsperday	MR Egger	29	0.287244	0.357775	(-0.41, 0.99)	0.43
Full_Thickness	coffee_cupsperday	Weighted median	29	-0.0737679	0.127291	(-0.32, 0.18)	0.56
Full_Thickness	coffee_cupsperday	Simple mode	29	-0.20107	0.270202	(-0.73, 0.33)	0.46
Full_Thickness	coffee_cupsperday	Weighted mode	29	-0.137487	0.246452	(-0.62, 0.35)	0.58
Full_Thickness	cookedveg_TBSperday	IVW(MRE)	29	-0.0256612	0.128403	(-0.28, 0.23)	0.84
Full_Thickness	cookedveg_TBSperday	MR Egger	29	0.265366	0.385426	(-0.49, 1.02)	0.5
Full_Thickness	cookedveg_TBSperday	Weighted median	29	-0.135821	0.135601	(-0.4, 0.13)	0.32
Full_Thickness	cookedveg_TBSperday	Simple mode	29	-0.122507	0.296377	(-0.7, 0.46)	0.68
Full_Thickness	cookedveg_TBSperday	Weighted mode	29	-0.166422	0.267064	(-0.69, 0.36)	0.54
Full_Thickness	doyouaddsalt	IVW(MRE)	29	-0.128176	0.120654	(-0.36, 0.11)	0.29
Full_Thickness	doyouaddsalt	MR Egger	29	-0.297083	0.364735	(-1.01, 0.42)	0.42
Full_Thickness	doyouaddsalt	Weighted median	29	-0.0865287	0.125599	(-0.33, 0.16)	0.49
Full_Thickness	doyouaddsalt	Simple mode	29	-0.0901818	0.236367	(-0.55, 0.37)	0.71
Full_Thickness	doyouaddsalt	Weighted mode	29	-0.0901818	0.232584	(-0.55, 0.37)	0.7
Full_Thickness	freshfruit_piecesperday	IVW(MRE)	29	0.165013	0.124804	(-0.08, 0.41)	0.19
Full_Thickness	freshfruit_piecesperday	MR Egger	29	0.548608	0.370723	(-0.18, 1.28)	0.15
Full_Thickness	freshfruit_piecesperday	Weighted median	29	0.0996784	0.13256	(-0.16, 0.36)	0.45
Full_Thickness	freshfruit_piecesperday	Simple mode	29	0.180082	0.241365	(-0.29, 0.65)	0.46
Full_Thickness	freshfruit_piecesperday	Weighted mode	29	0.138912	0.240606	(-0.33, 0.61)	0.57
Full_Thickness	hotdrinktemp	IVW(MRE)	29	-0.155194	0.128592	(-0.41, 0.1)	0.23
Full_Thickness	hotdrinktemp	MR Egger	29	-0.444089	0.385986	(-1.2, 0.31)	0.26
Full_Thickness	hotdrinktemp	Weighted median	29	-0.0508238	0.128687	(-0.3, 0.2)	0.69
Full_Thickness	hotdrinktemp	Simple mode	29	0.111758	0.275756	(-0.43, 0.65)	0.69
Full_Thickness	hotdrinktemp	Weighted mode	29	0.0482125	0.259463	(-0.46, 0.56)	0.85
Full_Thickness	lambmutton_overallfreq	IVW(MRE)	29	-0.171027	0.163899	(-0.49, 0.15)	0.3
Full_Thickness	lambmutton_overallfreq	MR Egger	29	0.0141248	0.496318	(-0.96, 0.99)	0.98
Full_Thickness	lambmutton_overallfreq	Weighted median	29	0.0894452	0.148795	(-0.2, 0.38)	0.55
Full_Thickness	lambmutton_overallfreq	Simple mode	29	0.147378	0.300427	(-0.44, 0.74)	0.63
Full_Thickness	lambmutton_overallfreq	Weighted mode	29	0.13623	0.25033	(-0.35, 0.63)	0.59
Full_Thickness	milk_typeused_bin5	IVW(MRE)	29	-0.0146321	0.0662796	(-0.14, 0.12)	0.83
Full_Thickness	milk_typeused_bin5	MR Egger	29	0.0108245	0.201237	(-0.38, 0.41)	0.96
Full_Thickness	milk_typeused_bin5	Weighted median	29	0.0129852	0.0858374	(-0.16, 0.18)	0.88
Full_Thickness	milk_typeused_bin5	Simple mode	29	0.0773226	0.194013	(-0.3, 0.46)	0.69
Full_Thickness	milk_typeused_bin5	Weighted mode	29	0.0132269	0.178981	(-0.34, 0.36)	0.94
Full_Thickness	milk_typeused_bin9	IVW(MRE)	29	0.0594639	0.111455	(-0.16, 0.28)	0.59
Full_Thickness	milk_typeused_bin9	MR Egger	29	0.265271	0.335884	(-0.39, 0.92)	0.44
Full_Thickness	milk_typeused_bin9	Weighted median	29	0.0418476	0.118629	(-0.19, 0.27)	0.72
Full_Thickness	milk_typeused_bin9	Simple mode	29	0.051543	0.231113	(-0.4, 0.5)	0.83
Full_Thickness	milk_typeused_bin9	Weighted mode	29	0.0669347	0.218439	(-0.36, 0.5)	0.76
Full_Thickness	nonoilyfish_overallfreq	IVW(MRE)	29	-0.128477	0.0942068	(-0.31, 0.06)	0.17
Full_Thickness	nonoilyfish_overallfreq	MR Egger	29	0.226302	0.276818	(-0.32, 0.77)	0.42
Full_Thickness	nonoilyfish_overallfreq	Weighted median	29	-0.0888812	0.126675	(-0.34, 0.16)	0.48
Full_Thickness	nonoilyfish_overallfreq	Simple mode	29	-0.117315	0.287387	(-0.68, 0.45)	0.69
Full_Thickness	nonoilyfish_overallfreq	Weighted mode	29	-0.17605	0.254113	(-0.67, 0.32)	0.49
Full_Thickness	oilyfish_overallfreq	IVW(MRE)	29	-0.161729	0.128623	(-0.41, 0.09)	0.21
Full_Thickness	oilyfish_overallfreq	MR Egger	29	0.402148	0.373196	(-0.33, 1.13)	0.29
Full_Thickness	oilyfish_overallfreq	Weighted median	29	-0.0860791	0.11967	(-0.32, 0.15)	0.47
Full_Thickness	oilyfish_overallfreq	Simple mode	29	-0.0990319	0.228181	(-0.55, 0.35)	0.67
Full_Thickness	oilyfish_overallfreq	Weighted mode	29	-0.0793146	0.234817	(-0.54, 0.38)	0.74
Full_Thickness	pork_overallfreq	IVW(MRE)	29	-0.142038	0.117382	(-0.37, 0.09)	0.23
Full_Thickness	pork_overallfreq	MR Egger	29	0.0469969	0.354407	(-0.65, 0.74)	0.9
Full_Thickness	pork_overallfreq	Weighted median	29	0.058365	0.125341	(-0.19, 0.3)	0.64
Full_Thickness	pork_overallfreq	Simple mode	29	0.111208	0.231302	(-0.34, 0.56)	0.63
Full_Thickness	pork_overallfreq	Weighted mode	29	0.111208	0.221445	(-0.32, 0.55)	0.62
Full_Thickness	rawveg_TBSperday	IVW(MRE)	29	-0.171588	0.147665	(-0.46, 0.12)	0.25
Full_Thickness	rawveg_TBSperday	MR Egger	29	-0.0374325	0.447667	(-0.91, 0.84)	0.93
Full_Thickness	rawveg_TBSperday	Weighted median	29	-0.0948683	0.136486	(-0.36, 0.17)	0.49
Full_Thickness	rawveg_TBSperday	Simple mode	29	-0.0911458	0.262282	(-0.61, 0.42)	0.73
Full_Thickness	rawveg_TBSperday	Weighted mode	29	-0.0911458	0.223286	(-0.53, 0.35)	0.69
Full_Thickness	tea_cupsperday	IVW(MRE)	29	0.00670241	0.125201	(-0.24, 0.25)	0.96
Full_Thickness	tea_cupsperday	MR Egger	29	-0.168012	0.378497	(-0.91, 0.57)	0.66
Full_Thickness	tea_cupsperday	Weighted median	29	0.121997	0.12334	(-0.12, 0.36)	0.32
Full_Thickness	tea_cupsperday	Simple mode	29	0.279707	0.251833	(-0.21, 0.77)	0.28
Full_Thickness	tea_cupsperday	Weighted mode	29	0.209247	0.226372	(-0.23, 0.65)	0.36
Full_Thickness	water_glassesperday	IVW(MRE)	29	0.201454	0.160425	(-0.11, 0.52)	0.21
Full_Thickness	water_glassesperday	MR Egger	29	0.369047	0.485865	(-0.58, 1.32)	0.45
Full_Thickness	water_glassesperday	Weighted median	29	0.0949637	0.124591	(-0.15, 0.34)	0.45
Full_Thickness	water_glassesperday	Simple mode	29	0.228857	0.228234	(-0.22, 0.68)	0.32
Full_Thickness	water_glassesperday	Weighted mode	29	0.240658	0.216391	(-0.18, 0.66)	0.28

## Sheet: Cortical regions(BH)
Supplementary Table 5.3 result of MR estimates for the association between the cortical regions and food type.(with Benjamini-Hochberg)
exposure	outcome	method	nSNP	beta	se	95%CI	pvalue	P(BH)
THICK_caudalanteriorcingulate	alcohol_overallfreq	IVW(MRE)	10	-0.182139	0.0478617	(-0.28, -0.09)	0.00014	0.00952
THICK_parsorbitalis	alcohol_overallfreq	IVW(MRE)	12	0.127814	0.0561608	(0.02, 0.24)	0.023	0.731
THICK_parstriangularis	alcohol_overallfreq	IVW(MRE)	18	-0.251928	0.124523	(-0.5, -0.01)	0.043	0.731
THICK_rostralmiddlefrontal	alcohol_overallfreq	IVW(MRE)	14	-0.322844	0.156104	(-0.63, -0.02)	0.039	0.731
SA_fusiform	alcohol_overallfreq	IVW(MRE)	19	8.07502e-05	6.34983e-05	(0, 0)	0.2	0.780741
SA_inferiorparietal	alcohol_overallfreq	IVW(MRE)	31	2.16233e-05	2.14753e-05	(0, 0)	0.31	0.780741
SA_insula	alcohol_overallfreq	IVW(MRE)	29	9.76781e-05	5.80183e-05	(0, 0)	0.09	0.780741
SA_isthmuscingulate	alcohol_overallfreq	IVW(MRE)	20	-0.000107139	9.32543e-05	(0, 0)	0.25	0.780741
SA_lingual	alcohol_overallfreq	IVW(MRE)	39	3.42052e-05	2.67668e-05	(0, 0)	0.2	0.780741
SA_medialorbitofrontal	alcohol_overallfreq	IVW(MRE)	10	-0.000236756	0.000212688	(0, 0)	0.27	0.780741
SA_parstriangularis	alcohol_overallfreq	IVW(MRE)	27	-6.4713e-05	6.03428e-05	(0, 0)	0.28	0.780741
SA_pericalcarine	alcohol_overallfreq	IVW(MRE)	39	-0.000122295	7.76203e-05	(0, 0)	0.12	0.780741
SA_posteriorcingulate	alcohol_overallfreq	IVW(MRE)	24	-9.09213e-05	8.82543e-05	(0, 0)	0.3	0.780741
SA_precentral	alcohol_overallfreq	IVW(MRE)	25	-4.68441e-05	2.78366e-05	(0, 0)	0.09	0.780741
SA_precuneus	alcohol_overallfreq	IVW(MRE)	31	4.0841e-05	3.60806e-05	(0, 0)	0.26	0.780741
SA_rostralanteriorcingulate	alcohol_overallfreq	IVW(MRE)	16	0.000257651	0.000180749	(0, 0)	0.15	0.780741
SA_superiorfrontal	alcohol_overallfreq	IVW(MRE)	23	2.90495e-05	2.79047e-05	(0, 0)	0.3	0.780741
SA_superiorparietal	alcohol_overallfreq	IVW(MRE)	28	4.87637e-05	2.92624e-05	(0, 0)	0.1	0.780741
THICK_inferiorparietal	alcohol_overallfreq	IVW(MRE)	13	0.239667	0.151017	(-0.06, 0.54)	0.11	0.780741
THICK_inferiortemporal	alcohol_overallfreq	IVW(MRE)	18	-0.201438	0.179673	(-0.55, 0.15)	0.26	0.780741
THICK_isthmuscingulate	alcohol_overallfreq	IVW(MRE)	28	-0.0689613	0.04796	(-0.16, 0.03)	0.15	0.780741
THICK_middletemporal	alcohol_overallfreq	IVW(MRE)	10	-0.292853	0.203374	(-0.69, 0.11)	0.15	0.780741
THICK_precentral	alcohol_overallfreq	IVW(MRE)	14	-0.182414	0.136775	(-0.45, 0.09)	0.18	0.780741
THICK_superiorfrontal	alcohol_overallfreq	IVW(MRE)	22	-0.296884	0.269964	(-0.83, 0.23)	0.27	0.780741
THICK_superiorparietal	alcohol_overallfreq	IVW(MRE)	14	0.173585	0.172207	(-0.16, 0.51)	0.31	0.780741
THICK_supramarginal	alcohol_overallfreq	IVW(MRE)	20	0.194714	0.159608	(-0.12, 0.51)	0.22	0.780741
THICK_temporalpole	alcohol_overallfreq	IVW(MRE)	6	-0.115446	0.0604039	(-0.23, 0)	0.06	0.780741
SA_caudalanteriorcingulate	alcohol_overallfreq	IVW(MRE)	15	0.000145137	0.000172601	(0, 0)	0.4	0.796571
SA_frontalpole	alcohol_overallfreq	IVW(MRE)	11	0.00043625	0.000454032	(0, 0)	0.34	0.796571
SA_transversetemporal	alcohol_overallfreq	IVW(MRE)	35	-0.000144023	0.00016698	(0, 0)	0.39	0.796571
THICK_cuneus	alcohol_overallfreq	IVW(MRE)	8	0.402852	0.46355	(-0.51, 1.31)	0.38	0.796571
THICK_fusiform	alcohol_overallfreq	IVW(MRE)	8	0.172694	0.208774	(-0.24, 0.58)	0.41	0.796571
THICK_lingual	alcohol_overallfreq	IVW(MRE)	14	0.153072	0.18396	(-0.21, 0.51)	0.41	0.796571
THICK_medialorbitofrontal	alcohol_overallfreq	IVW(MRE)	14	-0.092007	0.0953575	(-0.28, 0.09)	0.33	0.796571
THICK_rostralanteriorcingulate	alcohol_overallfreq	IVW(MRE)	23	-0.060407	0.0720914	(-0.2, 0.08)	0.4	0.796571
SA_parsopercularis	alcohol_overallfreq	IVW(MRE)	20	-3.77938e-05	4.90245e-05	(0, 0)	0.44	0.808649
SA_parsorbitalis	alcohol_overallfreq	IVW(MRE)	12	0.000265486	0.00034064	(0, 0)	0.44	0.808649
SA_bankssts	alcohol_overallfreq	IVW(MRE)	19	0.000109351	0.000167611	(0, 0)	0.51	0.841905
SA_entorhinal	alcohol_overallfreq	IVW(MRE)	15	0.000152227	0.000235728	(0, 0)	0.52	0.841905
SA_temporalpole	alcohol_overallfreq	IVW(MRE)	15	0.000374097	0.000529179	(0, 0)	0.48	0.841905
THICK_superiortemporal	alcohol_overallfreq	IVW(MRE)	11	-0.113588	0.168825	(-0.44, 0.22)	0.5	0.841905
THICK_transversetemporal	alcohol_overallfreq	IVW(MRE)	12	-0.0458825	0.0699515	(-0.18, 0.09)	0.51	0.841905
THICK_entorhinal	alcohol_overallfreq	IVW(MRE)	9	0.046234	0.0762829	(-0.1, 0.2)	0.54	0.85
THICK_lateraloccipital	alcohol_overallfreq	IVW(MRE)	13	-0.0839479	0.1393	(-0.36, 0.19)	0.55	0.85
SA_lateralorbitofrontal	alcohol_overallfreq	IVW(MRE)	24	-3.70654e-05	7.6477e-05	(0, 0)	0.63	0.931304
THICK_caudalmiddlefrontal	alcohol_overallfreq	IVW(MRE)	12	-0.0697289	0.146801	(-0.36, 0.22)	0.63	0.931304
SA_caudalmiddlefrontal	alcohol_overallfreq	IVW(MRE)	28	-7.14762e-06	4.16205e-05	(0, 0)	0.86	0.941538
SA_cuneus	alcohol_overallfreq	IVW(MRE)	23	-4.23953e-05	0.000112162	(0, 0)	0.71	0.941538
SA_inferiortemporal	alcohol_overallfreq	IVW(MRE)	27	5.74309e-06	4.28611e-05	(0, 0)	0.89	0.941538
SA_lateraloccipital	alcohol_overallfreq	IVW(MRE)	20	1.53302e-05	4.69792e-05	(0, 0)	0.74	0.941538
SA_middletemporal	alcohol_overallfreq	IVW(MRE)	22	1.31015e-05	4.19046e-05	(0, 0)	0.75	0.941538
SA_paracentral	alcohol_overallfreq	IVW(MRE)	26	-1.37958e-05	7.93986e-05	(0, 0)	0.86	0.941538
SA_parahippocampal	alcohol_overallfreq	IVW(MRE)	15	-2.38924e-05	0.000154869	(0, 0)	0.88	0.941538
SA_superiortemporal	alcohol_overallfreq	IVW(MRE)	22	9.19598e-06	4.41475e-05	(0, 0)	0.83	0.941538
SA_supramarginal	alcohol_overallfreq	IVW(MRE)	24	3.96049e-06	3.11326e-05	(0, 0)	0.9	0.941538
THICK_bankssts	alcohol_overallfreq	IVW(MRE)	12	-0.0257388	0.210901	(-0.44, 0.39)	0.9	0.941538
THICK_insula	alcohol_overallfreq	IVW(MRE)	14	-0.0326075	0.151727	(-0.33, 0.26)	0.83	0.941538
THICK_lateralorbitofrontal	alcohol_overallfreq	IVW(MRE)	7	-0.0489967	0.17683	(-0.4, 0.3)	0.78	0.941538
THICK_paracentral	alcohol_overallfreq	IVW(MRE)	14	-0.0197979	0.123595	(-0.26, 0.22)	0.87	0.941538
THICK_parahippocampal	alcohol_overallfreq	IVW(MRE)	26	0.00990617	0.047929	(-0.08, 0.1)	0.84	0.941538
THICK_parsopercularis	alcohol_overallfreq	IVW(MRE)	16	-0.0350744	0.0951791	(-0.22, 0.15)	0.71	0.941538
THICK_pericalcarine	alcohol_overallfreq	IVW(MRE)	18	-0.043823	0.119823	(-0.28, 0.19)	0.71	0.941538
THICK_postcentral	alcohol_overallfreq	IVW(MRE)	24	-0.0240664	0.125779	(-0.27, 0.22)	0.85	0.941538
THICK_posteriorcingulate	alcohol_overallfreq	IVW(MRE)	13	0.0342782	0.150301	(-0.26, 0.33)	0.82	0.941538
THICK_precuneus	alcohol_overallfreq	IVW(MRE)	20	-0.070661	0.167623	(-0.4, 0.26)	0.67	0.941538
SA_postcentral	alcohol_overallfreq	IVW(MRE)	21	-3.87789e-06	4.47021e-05	(0, 0)	0.93	0.943881
THICK_frontalpole	alcohol_overallfreq	IVW(MRE)	12	0.00500538	0.0525036	(-0.1, 0.11)	0.92	0.943881
SA_rostralmiddlefrontal	alcohol_overallfreq	IVW(MRE)	30	1.4143e-06	2.99809e-05	(0, 0)	0.96	0.96
SA_caudalanteriorcingulate	anyalcohol_glassespermonth	IVW(MRE)	15	0.000329343	0.000147969	(0, 0)	0.026	0.68
SA_entorhinal	anyalcohol_glassespermonth	IVW(MRE)	15	0.000284726	0.000150845	(0, 0)	0.06	0.68
THICK_caudalanteriorcingulate	anyalcohol_glassespermonth	IVW(MRE)	10	-0.114804	0.0617682	(-0.24, 0.01)	0.06	0.68
THICK_isthmuscingulate	anyalcohol_glassespermonth	IVW(MRE)	28	-0.091214	0.0487022	(-0.19, 0)	0.06	0.68
THICK_lingual	anyalcohol_glassespermonth	IVW(MRE)	14	0.366786	0.177846	(0.02, 0.72)	0.039	0.68
THICK_medialorbitofrontal	anyalcohol_glassespermonth	IVW(MRE)	14	-0.239885	0.10554	(-0.45, -0.03)	0.023	0.68
SA_fusiform	anyalcohol_glassespermonth	IVW(MRE)	19	8.44442e-05	7.45679e-05	(0, 0)	0.26	0.75234
SA_inferiorparietal	anyalcohol_glassespermonth	IVW(MRE)	31	1.52859e-05	2.10339e-05	(0, 0)	0.47	0.75234
SA_inferiortemporal	anyalcohol_glassespermonth	IVW(MRE)	27	2.90808e-05	4.06226e-05	(0, 0)	0.47	0.75234
SA_insula	anyalcohol_glassespermonth	IVW(MRE)	29	7.52104e-05	5.68072e-05	(0, 0)	0.19	0.75234
SA_isthmuscingulate	anyalcohol_glassespermonth	IVW(MRE)	20	-7.01016e-05	7.86423e-05	(0, 0)	0.37	0.75234
SA_lingual	anyalcohol_glassespermonth	IVW(MRE)	39	2.53252e-05	2.7696e-05	(0, 0)	0.36	0.75234
SA_medialorbitofrontal	anyalcohol_glassespermonth	IVW(MRE)	10	-0.000274791	0.000220428	(0, 0)	0.21	0.75234
SA_paracentral	anyalcohol_glassespermonth	IVW(MRE)	26	-4.74773e-05	7.16805e-05	(0, 0)	0.51	0.75234
SA_parsopercularis	anyalcohol_glassespermonth	IVW(MRE)	20	-5.03532e-05	4.77309e-05	(0, 0)	0.29	0.75234
SA_parstriangularis	anyalcohol_glassespermonth	IVW(MRE)	27	-9.6788e-05	5.69177e-05	(0, 0)	0.09	0.75234
SA_pericalcarine	anyalcohol_glassespermonth	IVW(MRE)	39	-0.000122155	7.78025e-05	(0, 0)	0.12	0.75234
SA_postcentral	anyalcohol_glassespermonth	IVW(MRE)	21	2.93413e-05	4.28526e-05	(0, 0)	0.49	0.75234
SA_posteriorcingulate	anyalcohol_glassespermonth	IVW(MRE)	24	-9.34217e-05	9.7071e-05	(0, 0)	0.34	0.75234
SA_precentral	anyalcohol_glassespermonth	IVW(MRE)	25	-1.76552e-05	2.55273e-05	(0, 0)	0.49	0.75234
SA_precuneus	anyalcohol_glassespermonth	IVW(MRE)	31	3.95975e-05	3.54481e-05	(0, 0)	0.26	0.75234
SA_rostralanteriorcingulate	anyalcohol_glassespermonth	IVW(MRE)	16	0.000292533	0.00018107	(0, 0)	0.11	0.75234
SA_superiorparietal	anyalcohol_glassespermonth	IVW(MRE)	28	2.94243e-05	2.65929e-05	(0, 0)	0.27	0.75234
SA_temporalpole	anyalcohol_glassespermonth	IVW(MRE)	15	0.000596712	0.000643094	(0, 0)	0.35	0.75234
SA_transversetemporal	anyalcohol_glassespermonth	IVW(MRE)	35	-0.000173274	0.000168211	(0, 0)	0.3	0.75234
THICK_cuneus	anyalcohol_glassespermonth	IVW(MRE)	8	0.41629	0.584886	(-0.73, 1.56)	0.48	0.75234
THICK_entorhinal	anyalcohol_glassespermonth	IVW(MRE)	9	0.0908114	0.0942864	(-0.09, 0.28)	0.34	0.75234
THICK_fusiform	anyalcohol_glassespermonth	IVW(MRE)	8	0.242689	0.179607	(-0.11, 0.59)	0.18	0.75234
THICK_inferiorparietal	anyalcohol_glassespermonth	IVW(MRE)	13	0.140537	0.198897	(-0.25, 0.53)	0.48	0.75234
THICK_inferiortemporal	anyalcohol_glassespermonth	IVW(MRE)	18	-0.144277	0.222802	(-0.58, 0.29)	0.52	0.75234
THICK_insula	anyalcohol_glassespermonth	IVW(MRE)	14	0.106182	0.159251	(-0.21, 0.42)	0.5	0.75234
THICK_lateralorbitofrontal	anyalcohol_glassespermonth	IVW(MRE)	7	-0.140843	0.171359	(-0.48, 0.2)	0.41	0.75234
THICK_middletemporal	anyalcohol_glassespermonth	IVW(MRE)	10	-0.309543	0.208486	(-0.72, 0.1)	0.14	0.75234
THICK_paracentral	anyalcohol_glassespermonth	IVW(MRE)	14	-0.131571	0.113626	(-0.35, 0.09)	0.25	0.75234
THICK_parsopercularis	anyalcohol_glassespermonth	IVW(MRE)	16	-0.0930731	0.0953208	(-0.28, 0.09)	0.33	0.75234
THICK_parsorbitalis	anyalcohol_glassespermonth	IVW(MRE)	12	0.0598091	0.0835457	(-0.1, 0.22)	0.47	0.75234
THICK_parstriangularis	anyalcohol_glassespermonth	IVW(MRE)	18	-0.153469	0.124829	(-0.4, 0.09)	0.22	0.75234
THICK_pericalcarine	anyalcohol_glassespermonth	IVW(MRE)	18	-0.064042	0.0926373	(-0.25, 0.12)	0.49	0.75234
THICK_postcentral	anyalcohol_glassespermonth	IVW(MRE)	24	0.0750621	0.115128	(-0.15, 0.3)	0.51	0.75234
THICK_precentral	anyalcohol_glassespermonth	IVW(MRE)	14	-0.133111	0.137889	(-0.4, 0.14)	0.33	0.75234
THICK_precuneus	anyalcohol_glassespermonth	IVW(MRE)	20	-0.150598	0.178471	(-0.5, 0.2)	0.4	0.75234
THICK_rostralmiddlefrontal	anyalcohol_glassespermonth	IVW(MRE)	14	-0.227542	0.150613	(-0.52, 0.07)	0.13	0.75234
THICK_superiorfrontal	anyalcohol_glassespermonth	IVW(MRE)	22	-0.270292	0.226768	(-0.71, 0.17)	0.23	0.75234
THICK_superiorparietal	anyalcohol_glassespermonth	IVW(MRE)	14	0.126421	0.152809	(-0.17, 0.43)	0.41	0.75234
THICK_supramarginal	anyalcohol_glassespermonth	IVW(MRE)	20	0.195114	0.164891	(-0.13, 0.52)	0.24	0.75234
THICK_temporalpole	anyalcohol_glassespermonth	IVW(MRE)	6	-0.0744992	0.0730278	(-0.22, 0.07)	0.31	0.75234
THICK_transversetemporal	anyalcohol_glassespermonth	IVW(MRE)	12	-0.0811416	0.0778235	(-0.23, 0.07)	0.3	0.75234
SA_lateralorbitofrontal	anyalcohol_glassespermonth	IVW(MRE)	24	-4.06989e-05	6.82508e-05	(0, 0)	0.55	0.779167
SA_cuneus	anyalcohol_glassespermonth	IVW(MRE)	23	-5.6974e-05	0.00010966	(0, 0)	0.6	0.816
THICK_frontalpole	anyalcohol_glassespermonth	IVW(MRE)	12	0.0230959	0.0436825	(-0.06, 0.11)	0.6	0.816
THICK_posteriorcingulate	anyalcohol_glassespermonth	IVW(MRE)	13	-0.0682061	0.141584	(-0.35, 0.21)	0.63	0.84
SA_superiortemporal	anyalcohol_glassespermonth	IVW(MRE)	22	-2.15494e-05	4.71616e-05	(0, 0)	0.65	0.85
SA_bankssts	anyalcohol_glassespermonth	IVW(MRE)	19	6.02628e-05	0.000177236	(0, 0)	0.73	0.902759
SA_parahippocampal	anyalcohol_glassespermonth	IVW(MRE)	15	5.01093e-05	0.000171761	(0, 0)	0.77	0.902759
SA_parsorbitalis	anyalcohol_glassespermonth	IVW(MRE)	12	8.48776e-05	0.000287437	(0, 0)	0.77	0.902759
SA_rostralmiddlefrontal	anyalcohol_glassespermonth	IVW(MRE)	30	-9.31975e-06	3.22389e-05	(0, 0)	0.77	0.902759
SA_superiorfrontal	anyalcohol_glassespermonth	IVW(MRE)	23	1.03524e-05	3.27135e-05	(0, 0)	0.75	0.902759
THICK_bankssts	anyalcohol_glassespermonth	IVW(MRE)	12	-0.0787349	0.241697	(-0.55, 0.39)	0.74	0.902759
SA_caudalmiddlefrontal	anyalcohol_glassespermonth	IVW(MRE)	28	-1.0036e-05	3.93999e-05	(0, 0)	0.8	0.922034
SA_middletemporal	anyalcohol_glassespermonth	IVW(MRE)	22	1.18151e-05	5.15374e-05	(0, 0)	0.82	0.929333
SA_frontalpole	anyalcohol_glassespermonth	IVW(MRE)	11	2.70938e-05	0.000401402	(0, 0)	0.95	0.978788
SA_lateraloccipital	anyalcohol_glassespermonth	IVW(MRE)	20	8.13739e-06	5.79141e-05	(0, 0)	0.89	0.978788
SA_supramarginal	anyalcohol_glassespermonth	IVW(MRE)	24	-3.20718e-06	3.76889e-05	(0, 0)	0.93	0.978788
THICK_parahippocampal	anyalcohol_glassespermonth	IVW(MRE)	26	0.00431744	0.044314	(-0.08, 0.09)	0.92	0.978788
THICK_rostralanteriorcingulate	anyalcohol_glassespermonth	IVW(MRE)	23	-0.00614092	0.0775507	(-0.16, 0.15)	0.94	0.978788
THICK_superiortemporal	anyalcohol_glassespermonth	IVW(MRE)	11	-0.0135972	0.211576	(-0.43, 0.4)	0.95	0.978788
THICK_caudalmiddlefrontal	anyalcohol_glassespermonth	IVW(MRE)	12	-0.00677101	0.158026	(-0.32, 0.3)	0.97	0.984478
THICK_lateraloccipital	anyalcohol_glassespermonth	IVW(MRE)	13	0.000282252	0.152291	(-0.3, 0.3)	1	1
SA_caudalanteriorcingulate	beef_overallfreq	IVW(MRE)	15	0.000420902	0.00013248	(0, 0)	0.0015	0.102
SA_lingual	beef_overallfreq	IVW(MRE)	39	6.02631e-05	2.92461e-05	(0, 0)	0.039	0.884
THICK_postcentral	beef_overallfreq	IVW(MRE)	24	-0.217715	0.105099	(-0.42, -0.01)	0.038	0.884
SA_caudalmiddlefrontal	beef_overallfreq	IVW(MRE)	28	-6.50226e-05	3.61915e-05	(0, 0)	0.07	0.889231
SA_cuneus	beef_overallfreq	IVW(MRE)	23	9.68713e-05	6.25416e-05	(0, 0)	0.12	0.889231
SA_inferiorparietal	beef_overallfreq	IVW(MRE)	31	-3.24462e-05	2.34912e-05	(0, 0)	0.17	0.889231
SA_isthmuscingulate	beef_overallfreq	IVW(MRE)	20	-0.000156557	0.000110899	(0, 0)	0.16	0.889231
SA_lateralorbitofrontal	beef_overallfreq	IVW(MRE)	24	-0.000103109	6.38332e-05	(0, 0)	0.11	0.889231
SA_transversetemporal	beef_overallfreq	IVW(MRE)	35	0.000302456	0.000172847	(0, 0)	0.08	0.889231
THICK_isthmuscingulate	beef_overallfreq	IVW(MRE)	28	0.0683819	0.0502046	(-0.03, 0.17)	0.17	0.889231
THICK_middletemporal	beef_overallfreq	IVW(MRE)	10	0.248092	0.15375	(-0.05, 0.55)	0.11	0.889231
THICK_posteriorcingulate	beef_overallfreq	IVW(MRE)	13	0.145592	0.0959688	(-0.04, 0.33)	0.13	0.889231
THICK_rostralanteriorcingulate	beef_overallfreq	IVW(MRE)	23	-0.0653923	0.0479703	(-0.16, 0.03)	0.17	0.889231
SA_entorhinal	beef_overallfreq	IVW(MRE)	15	0.000313929	0.000245728	(0, 0)	0.2	0.971429
SA_bankssts	beef_overallfreq	IVW(MRE)	19	4.50353e-05	0.000101761	(0, 0)	0.66	0.993016
SA_fusiform	beef_overallfreq	IVW(MRE)	19	2.15088e-05	4.63294e-05	(0, 0)	0.64	0.993016
SA_inferiortemporal	beef_overallfreq	IVW(MRE)	27	-3.73155e-05	3.59636e-05	(0, 0)	0.3	0.993016
SA_lateraloccipital	beef_overallfreq	IVW(MRE)	20	-3.6101e-06	3.74206e-05	(0, 0)	0.92	0.993016
SA_middletemporal	beef_overallfreq	IVW(MRE)	22	-3.75246e-05	5.00918e-05	(0, 0)	0.45	0.993016
SA_paracentral	beef_overallfreq	IVW(MRE)	26	-2.01927e-05	8.41693e-05	(0, 0)	0.81	0.993016
SA_parahippocampal	beef_overallfreq	IVW(MRE)	15	1.16139e-05	0.000103941	(0, 0)	0.91	0.993016
SA_parsopercularis	beef_overallfreq	IVW(MRE)	20	-7.20422e-06	3.61568e-05	(0, 0)	0.84	0.993016
SA_parsorbitalis	beef_overallfreq	IVW(MRE)	12	-3.06867e-05	0.000323712	(0, 0)	0.92	0.993016
SA_parstriangularis	beef_overallfreq	IVW(MRE)	27	-3.2696e-05	3.03537e-05	(0, 0)	0.28	0.993016
SA_pericalcarine	beef_overallfreq	IVW(MRE)	39	7.17579e-06	3.3885e-05	(0, 0)	0.83	0.993016
SA_postcentral	beef_overallfreq	IVW(MRE)	21	-3.7516e-05	4.65173e-05	(0, 0)	0.42	0.993016
SA_posteriorcingulate	beef_overallfreq	IVW(MRE)	24	-7.46787e-05	0.000139884	(0, 0)	0.59	0.993016
SA_precentral	beef_overallfreq	IVW(MRE)	25	2.11287e-05	2.13348e-05	(0, 0)	0.32	0.993016
SA_precuneus	beef_overallfreq	IVW(MRE)	31	1.17839e-05	2.76355e-05	(0, 0)	0.67	0.993016
SA_rostralanteriorcingulate	beef_overallfreq	IVW(MRE)	16	-8.49448e-05	0.000106383	(0, 0)	0.42	0.993016
SA_rostralmiddlefrontal	beef_overallfreq	IVW(MRE)	30	2.94211e-06	2.23678e-05	(0, 0)	0.9	0.993016
SA_superiorfrontal	beef_overallfreq	IVW(MRE)	23	1.06217e-05	1.80572e-05	(0, 0)	0.56	0.993016
SA_superiorparietal	beef_overallfreq	IVW(MRE)	28	1.74553e-05	3.07858e-05	(0, 0)	0.57	0.993016
SA_superiortemporal	beef_overallfreq	IVW(MRE)	22	2.61764e-05	4.79487e-05	(0, 0)	0.59	0.993016
SA_supramarginal	beef_overallfreq	IVW(MRE)	24	1.75095e-05	3.22051e-05	(0, 0)	0.59	0.993016
SA_temporalpole	beef_overallfreq	IVW(MRE)	15	0.000150179	0.000245622	(0, 0)	0.54	0.993016
THICK_bankssts	beef_overallfreq	IVW(MRE)	12	-0.0708343	0.115509	(-0.3, 0.16)	0.54	0.993016
THICK_caudalanteriorcingulate	beef_overallfreq	IVW(MRE)	10	-0.0319765	0.0871435	(-0.2, 0.14)	0.71	0.993016
THICK_cuneus	beef_overallfreq	IVW(MRE)	8	-0.00734349	0.066995	(-0.14, 0.12)	0.91	0.993016
THICK_entorhinal	beef_overallfreq	IVW(MRE)	9	-0.0104505	0.0753462	(-0.16, 0.14)	0.89	0.993016
THICK_frontalpole	beef_overallfreq	IVW(MRE)	12	-0.0836626	0.0698667	(-0.22, 0.05)	0.23	0.993016
THICK_fusiform	beef_overallfreq	IVW(MRE)	8	0.0897738	0.146364	(-0.2, 0.38)	0.54	0.993016
THICK_inferiorparietal	beef_overallfreq	IVW(MRE)	13	0.156741	0.167614	(-0.17, 0.49)	0.35	0.993016
THICK_inferiortemporal	beef_overallfreq	IVW(MRE)	18	0.0316292	0.128086	(-0.22, 0.28)	0.8	0.993016
THICK_insula	beef_overallfreq	IVW(MRE)	14	-0.0681285	0.111321	(-0.29, 0.15)	0.54	0.993016
THICK_lateraloccipital	beef_overallfreq	IVW(MRE)	13	0.0117411	0.113278	(-0.21, 0.23)	0.92	0.993016
THICK_lingual	beef_overallfreq	IVW(MRE)	14	0.156546	0.202596	(-0.24, 0.55)	0.44	0.993016
THICK_medialorbitofrontal	beef_overallfreq	IVW(MRE)	14	-0.0199411	0.0819071	(-0.18, 0.14)	0.81	0.993016
THICK_paracentral	beef_overallfreq	IVW(MRE)	14	0.0769225	0.167394	(-0.25, 0.41)	0.65	0.993016
THICK_parahippocampal	beef_overallfreq	IVW(MRE)	26	0.017332	0.0454907	(-0.07, 0.11)	0.7	0.993016
THICK_parsopercularis	beef_overallfreq	IVW(MRE)	16	0.067618	0.118302	(-0.16, 0.3)	0.57	0.993016
THICK_parsorbitalis	beef_overallfreq	IVW(MRE)	12	0.0238118	0.08107	(-0.14, 0.18)	0.77	0.993016
THICK_parstriangularis	beef_overallfreq	IVW(MRE)	18	0.0191928	0.117821	(-0.21, 0.25)	0.87	0.993016
THICK_pericalcarine	beef_overallfreq	IVW(MRE)	18	-0.0287559	0.144003	(-0.31, 0.25)	0.84	0.993016
THICK_precentral	beef_overallfreq	IVW(MRE)	14	-0.0703171	0.124626	(-0.31, 0.17)	0.57	0.993016
THICK_precuneus	beef_overallfreq	IVW(MRE)	20	-0.0545272	0.146212	(-0.34, 0.23)	0.71	0.993016
THICK_rostralmiddlefrontal	beef_overallfreq	IVW(MRE)	14	-0.143066	0.213926	(-0.56, 0.28)	0.5	0.993016
THICK_superiorfrontal	beef_overallfreq	IVW(MRE)	22	-0.180345	0.174124	(-0.52, 0.16)	0.3	0.993016
THICK_superiorparietal	beef_overallfreq	IVW(MRE)	14	0.126628	0.193844	(-0.25, 0.51)	0.51	0.993016
THICK_superiortemporal	beef_overallfreq	IVW(MRE)	11	-0.0665929	0.146409	(-0.35, 0.22)	0.65	0.993016
THICK_supramarginal	beef_overallfreq	IVW(MRE)	20	-0.0302796	0.138299	(-0.3, 0.24)	0.83	0.993016
THICK_temporalpole	beef_overallfreq	IVW(MRE)	6	-0.0145309	0.13599	(-0.28, 0.25)	0.91	0.993016
THICK_transversetemporal	beef_overallfreq	IVW(MRE)	12	0.0403613	0.0891964	(-0.13, 0.22)	0.65	0.993016
SA_frontalpole	beef_overallfreq	IVW(MRE)	11	-8.70676e-07	0.000507535	(0, 0)	1	1
SA_insula	beef_overallfreq	IVW(MRE)	29	2.96137e-06	6.82465e-05	(0, 0)	0.97	1
SA_medialorbitofrontal	beef_overallfreq	IVW(MRE)	10	-2.47799e-07	6.37803e-05	(0, 0)	1	1
THICK_caudalmiddlefrontal	beef_overallfreq	IVW(MRE)	12	0.00984236	0.182333	(-0.35, 0.37)	0.96	1
THICK_lateralorbitofrontal	beef_overallfreq	IVW(MRE)	7	-0.00147184	0.0951059	(-0.19, 0.18)	0.99	1
THICK_caudalanteriorcingulate	Carbohydrate	IVW(MRE)	9	0.285671	0.0836049	(0.12, 0.45)	0.00063	0.03087
THICK_temporalpole	Carbohydrate	IVW(MRE)	6	0.153106	0.055245	(0.04, 0.26)	0.0056	0.1372
SA_fusiform	Carbohydrate	IVW(MRE)	19	-0.000126264	5.88988e-05	(0, 0)	0.032	0.224
SA_insula	Carbohydrate	IVW(MRE)	27	0.000166512	6.95987e-05	(0, 0)	0.017	0.224
THICK_cuneus	Carbohydrate	IVW(MRE)	8	-0.611964	0.28105	(-1.16, -0.06)	0.029	0.224
THICK_inferiortemporal	Carbohydrate	IVW(MRE)	15	-0.34795	0.154564	(-0.65, -0.05)	0.024	0.224
THICK_parsorbitalis	Carbohydrate	IVW(MRE)	11	-0.272826	0.123568	(-0.52, -0.03)	0.027	0.224
SA_frontalpole	Carbohydrate	IVW(MRE)	10	0.00106339	0.000511548	(0, 0)	0.038	0.23275
THICK_supramarginal	Carbohydrate	IVW(MRE)	19	-0.27403	0.137412	(-0.54, 0)	0.046	0.250444
THICK_superiortemporal	Carbohydrate	IVW(MRE)	8	-0.347341	0.198343	(-0.74, 0.04)	0.08	0.392
THICK_lateraloccipital	Carbohydrate	IVW(MRE)	12	-0.292112	0.187834	(-0.66, 0.08)	0.12	0.49
THICK_parsopercularis	Carbohydrate	IVW(MRE)	13	0.236275	0.152072	(-0.06, 0.53)	0.12	0.49
SA_posteriorcingulate	Carbohydrate	IVW(MRE)	22	0.000199614	0.000134261	(0, 0)	0.14	0.525
THICK_paracentral	Carbohydrate	IVW(MRE)	14	0.209735	0.144586	(-0.07, 0.49)	0.15	0.525
SA_rostralmiddlefrontal	Carbohydrate	IVW(MRE)	28	4.1869e-05	3.16351e-05	(0, 0)	0.19	0.605294
THICK_bankssts	Carbohydrate	IVW(MRE)	11	0.174598	0.140035	(-0.1, 0.45)	0.21	0.605294
THICK_superiorparietal	Carbohydrate	IVW(MRE)	15	-0.303373	0.23668	(-0.77, 0.16)	0.2	0.605294
SA_lingual	Carbohydrate	IVW(MRE)	36	-4.92483e-05	4.24681e-05	(0, 0)	0.25	0.63913
SA_middletemporal	Carbohydrate	IVW(MRE)	22	5.5531e-05	5.2514e-05	(0, 0)	0.29	0.63913
SA_paracentral	Carbohydrate	IVW(MRE)	24	-0.000100913	9.31887e-05	(0, 0)	0.28	0.63913
SA_parahippocampal	Carbohydrate	IVW(MRE)	13	-0.00026964	0.000250265	(0, 0)	0.28	0.63913
THICK_inferiorparietal	Carbohydrate	IVW(MRE)	13	-0.281647	0.270446	(-0.81, 0.25)	0.3	0.63913
THICK_insula	Carbohydrate	IVW(MRE)	11	0.153621	0.137389	(-0.12, 0.42)	0.26	0.63913
THICK_lateralorbitofrontal	Carbohydrate	IVW(MRE)	7	0.125058	0.129704	(-0.13, 0.38)	0.33	0.67375
SA_rostralanteriorcingulate	Carbohydrate	IVW(MRE)	15	-0.000175373	0.000197773	(0, 0)	0.38	0.7448
SA_caudalanteriorcingulate	Carbohydrate	IVW(MRE)	14	-0.0001548	0.000209173	(0, 0)	0.46	0.805
SA_superiorparietal	Carbohydrate	IVW(MRE)	27	-2.46521e-05	3.09952e-05	(0, 0)	0.43	0.805
THICK_lingual	Carbohydrate	IVW(MRE)	14	-0.169749	0.232043	(-0.62, 0.29)	0.46	0.805
SA_isthmuscingulate	Carbohydrate	IVW(MRE)	17	9.80452e-05	0.000171645	(0, 0)	0.57	0.846364
SA_parsorbitalis	Carbohydrate	IVW(MRE)	11	-0.000189582	0.00033309	(0, 0)	0.57	0.846364
SA_superiortemporal	Carbohydrate	IVW(MRE)	19	3.54355e-05	6.3117e-05	(0, 0)	0.57	0.846364
SA_supramarginal	Carbohydrate	IVW(MRE)	21	2.45232e-05	4.35938e-05	(0, 0)	0.57	0.846364
THICK_isthmuscingulate	Carbohydrate	IVW(MRE)	26	0.0442841	0.0681488	(-0.09, 0.18)	0.52	0.846364
SA_lateraloccipital	Carbohydrate	IVW(MRE)	20	-2.59734e-05	5.74845e-05	(0, 0)	0.65	0.898333
THICK_posteriorcingulate	Carbohydrate	IVW(MRE)	11	0.0693364	0.158653	(-0.24, 0.38)	0.66	0.898333
THICK_rostralmiddlefrontal	Carbohydrate	IVW(MRE)	11	0.103776	0.232945	(-0.35, 0.56)	0.66	0.898333
SA_pericalcarine	Carbohydrate	IVW(MRE)	34	2.32245e-05	6.75358e-05	(0, 0)	0.73	0.941316
THICK_transversetemporal	Carbohydrate	IVW(MRE)	10	0.0516144	0.151492	(-0.25, 0.35)	0.73	0.941316
THICK_caudalmiddlefrontal	Carbohydrate	IVW(MRE)	11	0.0556228	0.235265	(-0.41, 0.52)	0.81	0.945
THICK_frontalpole	Carbohydrate	IVW(MRE)	12	-0.0208722	0.0785947	(-0.17, 0.13)	0.79	0.945
THICK_medialorbitofrontal	Carbohydrate	IVW(MRE)	13	0.0402866	0.137833	(-0.23, 0.31)	0.77	0.945
THICK_parahippocampal	Carbohydrate	IVW(MRE)	24	0.0112504	0.0452431	(-0.08, 0.1)	0.8	0.945
SA_caudalmiddlefrontal	Carbohydrate	IVW(MRE)	27	-8.91075e-06	4.46999e-05	(0, 0)	0.84	0.957209
SA_cuneus	Carbohydrate	IVW(MRE)	23	-4.0717e-06	0.00012308	(0, 0)	0.97	0.97
SA_parsopercularis	Carbohydrate	IVW(MRE)	19	9.02265e-06	7.1663e-05	(0, 0)	0.9	0.97
SA_postcentral	Carbohydrate	IVW(MRE)	20	1.9905e-06	4.67945e-05	(0, 0)	0.97	0.97
THICK_middletemporal	Carbohydrate	IVW(MRE)	10	-0.0196087	0.179111	(-0.37, 0.33)	0.91	0.97
THICK_precentral	Carbohydrate	IVW(MRE)	13	0.0155904	0.180008	(-0.34, 0.37)	0.93	0.97
THICK_precuneus	Carbohydrate	IVW(MRE)	20	0.00868198	0.201869	(-0.39, 0.4)	0.97	0.97
SA_insula	cereal_bowlsperweek	IVW(MRE)	29	0.000158696	7.09374e-05	(0, 0)	0.025	0.634667
SA_rostralmiddlefrontal	cereal_bowlsperweek	IVW(MRE)	30	7.04904e-05	3.20642e-05	(0, 0)	0.028	0.634667
THICK_superiortemporal	cereal_bowlsperweek	IVW(MRE)	11	-0.276706	0.121837	(-0.52, -0.04)	0.023	0.634667
SA_bankssts	cereal_bowlsperweek	IVW(MRE)	19	-0.000194486	0.000105935	(0, 0)	0.07	0.68
SA_caudalanteriorcingulate	cereal_bowlsperweek	IVW(MRE)	15	-0.00013651	0.000112025	(0, 0)	0.22	0.68
SA_cuneus	cereal_bowlsperweek	IVW(MRE)	23	-8.96613e-05	6.22562e-05	(0, 0)	0.15	0.68
SA_frontalpole	cereal_bowlsperweek	IVW(MRE)	11	0.000469577	0.000390727	(0, 0)	0.23	0.68
SA_fusiform	cereal_bowlsperweek	IVW(MRE)	19	-0.000108154	6.54406e-05	(0, 0)	0.1	0.68
SA_parstriangularis	cereal_bowlsperweek	IVW(MRE)	27	0.000100569	6.21574e-05	(0, 0)	0.11	0.68
SA_pericalcarine	cereal_bowlsperweek	IVW(MRE)	39	-5.31096e-05	3.82619e-05	(0, 0)	0.17	0.68
SA_postcentral	cereal_bowlsperweek	IVW(MRE)	21	-6.0745e-05	4.43289e-05	(0, 0)	0.17	0.68
SA_rostralanteriorcingulate	cereal_bowlsperweek	IVW(MRE)	16	-0.000232436	0.000178699	(0, 0)	0.19	0.68
SA_superiortemporal	cereal_bowlsperweek	IVW(MRE)	22	7.14745e-05	4.91493e-05	(0, 0)	0.15	0.68
THICK_caudalmiddlefrontal	cereal_bowlsperweek	IVW(MRE)	12	0.169235	0.102177	(-0.03, 0.37)	0.1	0.68
THICK_inferiortemporal	cereal_bowlsperweek	IVW(MRE)	18	0.178698	0.135308	(-0.09, 0.44)	0.19	0.68
THICK_lingual	cereal_bowlsperweek	IVW(MRE)	14	-0.347094	0.188589	(-0.72, 0.02)	0.07	0.68
THICK_medialorbitofrontal	cereal_bowlsperweek	IVW(MRE)	14	0.134317	0.0911172	(-0.04, 0.31)	0.14	0.68
THICK_paracentral	cereal_bowlsperweek	IVW(MRE)	14	0.151026	0.12659	(-0.1, 0.4)	0.23	0.68
THICK_parahippocampal	cereal_bowlsperweek	IVW(MRE)	26	-0.0385742	0.0315899	(-0.1, 0.02)	0.22	0.68
THICK_parstriangularis	cereal_bowlsperweek	IVW(MRE)	18	0.170171	0.120256	(-0.07, 0.41)	0.16	0.68
THICK_postcentral	cereal_bowlsperweek	IVW(MRE)	24	-0.207573	0.120789	(-0.44, 0.03)	0.09	0.68
THICK_precuneus	cereal_bowlsperweek	IVW(MRE)	20	-0.177797	0.154804	(-0.48, 0.13)	0.25	0.68
THICK_rostralmiddlefrontal	cereal_bowlsperweek	IVW(MRE)	14	0.353359	0.188261	(-0.02, 0.72)	0.06	0.68
THICK_supramarginal	cereal_bowlsperweek	IVW(MRE)	20	-0.151335	0.11937	(-0.39, 0.08)	0.2	0.68
THICK_temporalpole	cereal_bowlsperweek	IVW(MRE)	6	0.110255	0.0967218	(-0.08, 0.3)	0.25	0.68
SA_isthmuscingulate	cereal_bowlsperweek	IVW(MRE)	20	-7.23314e-05	8.69467e-05	(0, 0)	0.41	0.753513
SA_lingual	cereal_bowlsperweek	IVW(MRE)	39	-2.47764e-05	3.02687e-05	(0, 0)	0.41	0.753513
SA_medialorbitofrontal	cereal_bowlsperweek	IVW(MRE)	10	0.000107462	0.000126975	(0, 0)	0.4	0.753513
THICK_bankssts	cereal_bowlsperweek	IVW(MRE)	12	0.136807	0.158184	(-0.17, 0.45)	0.39	0.753513
THICK_cuneus	cereal_bowlsperweek	IVW(MRE)	8	-0.143846	0.149861	(-0.44, 0.15)	0.34	0.753513
THICK_entorhinal	cereal_bowlsperweek	IVW(MRE)	9	-0.0416487	0.040426	(-0.12, 0.04)	0.3	0.753513
THICK_fusiform	cereal_bowlsperweek	IVW(MRE)	8	-0.163164	0.198499	(-0.55, 0.23)	0.41	0.753513
THICK_lateraloccipital	cereal_bowlsperweek	IVW(MRE)	13	0.149177	0.166234	(-0.18, 0.47)	0.37	0.753513
THICK_parsopercularis	cereal_bowlsperweek	IVW(MRE)	16	0.134438	0.145438	(-0.15, 0.42)	0.36	0.753513
THICK_parsorbitalis	cereal_bowlsperweek	IVW(MRE)	12	-0.037399	0.0442489	(-0.12, 0.05)	0.4	0.753513
THICK_posteriorcingulate	cereal_bowlsperweek	IVW(MRE)	13	0.0969788	0.111558	(-0.12, 0.32)	0.38	0.753513
THICK_transversetemporal	cereal_bowlsperweek	IVW(MRE)	12	-0.0976738	0.101393	(-0.3, 0.1)	0.34	0.753513
SA_caudalmiddlefrontal	cereal_bowlsperweek	IVW(MRE)	28	3.56599e-05	4.75266e-05	(0, 0)	0.45	0.765
THICK_precentral	cereal_bowlsperweek	IVW(MRE)	14	0.15694	0.196915	(-0.23, 0.54)	0.43	0.765
THICK_rostralanteriorcingulate	cereal_bowlsperweek	IVW(MRE)	23	-0.0490694	0.0651866	(-0.18, 0.08)	0.45	0.765
SA_inferiortemporal	cereal_bowlsperweek	IVW(MRE)	27	-2.36855e-05	4.21721e-05	(0, 0)	0.57	0.818775
SA_parsopercularis	cereal_bowlsperweek	IVW(MRE)	20	3.68429e-05	6.60205e-05	(0, 0)	0.58	0.818775
SA_posteriorcingulate	cereal_bowlsperweek	IVW(MRE)	24	-7.09288e-05	0.000107465	(0, 0)	0.51	0.818775
SA_supramarginal	cereal_bowlsperweek	IVW(MRE)	24	-1.9066e-05	3.27813e-05	(0, 0)	0.56	0.818775
THICK_frontalpole	cereal_bowlsperweek	IVW(MRE)	12	-0.0351684	0.0545761	(-0.14, 0.07)	0.52	0.818775
THICK_inferiorparietal	cereal_bowlsperweek	IVW(MRE)	13	0.131985	0.228639	(-0.32, 0.58)	0.56	0.818775
THICK_insula	cereal_bowlsperweek	IVW(MRE)	14	0.116231	0.17188	(-0.22, 0.45)	0.5	0.818775
THICK_lateralorbitofrontal	cereal_bowlsperweek	IVW(MRE)	7	0.095313	0.178394	(-0.25, 0.44)	0.59	0.818775
THICK_superiorparietal	cereal_bowlsperweek	IVW(MRE)	14	0.0946536	0.158581	(-0.22, 0.41)	0.55	0.818775
THICK_caudalanteriorcingulate	cereal_bowlsperweek	IVW(MRE)	10	-0.0278586	0.0576533	(-0.14, 0.09)	0.63	0.8568
SA_middletemporal	cereal_bowlsperweek	IVW(MRE)	22	1.85673e-05	4.10799e-05	(0, 0)	0.65	0.866667
SA_lateralorbitofrontal	cereal_bowlsperweek	IVW(MRE)	24	-2.15046e-05	5.2142e-05	(0, 0)	0.68	0.881482
SA_superiorparietal	cereal_bowlsperweek	IVW(MRE)	28	-8.61871e-06	2.1993e-05	(0, 0)	0.7	0.881482
THICK_isthmuscingulate	cereal_bowlsperweek	IVW(MRE)	28	0.022159	0.0547979	(-0.09, 0.13)	0.69	0.881482
SA_entorhinal	cereal_bowlsperweek	IVW(MRE)	15	-2.43449e-05	0.000262899	(0, 0)	0.93	0.984478
SA_inferiorparietal	cereal_bowlsperweek	IVW(MRE)	31	1.95994e-06	2.20974e-05	(0, 0)	0.93	0.984478
SA_lateraloccipital	cereal_bowlsperweek	IVW(MRE)	20	-5.33241e-06	4.96674e-05	(0, 0)	0.91	0.984478
SA_parahippocampal	cereal_bowlsperweek	IVW(MRE)	15	-3.95382e-05	0.000195942	(0, 0)	0.84	0.984478
SA_parsorbitalis	cereal_bowlsperweek	IVW(MRE)	12	9.70572e-06	0.000270063	(0, 0)	0.97	0.984478
SA_precentral	cereal_bowlsperweek	IVW(MRE)	25	-4.65453e-06	2.98819e-05	(0, 0)	0.88	0.984478
SA_precuneus	cereal_bowlsperweek	IVW(MRE)	31	-2.95412e-06	3.26753e-05	(0, 0)	0.93	0.984478
SA_superiorfrontal	cereal_bowlsperweek	IVW(MRE)	23	2.49081e-06	2.52611e-05	(0, 0)	0.92	0.984478
SA_temporalpole	cereal_bowlsperweek	IVW(MRE)	15	-4.48549e-05	0.000212927	(0, 0)	0.83	0.984478
SA_transversetemporal	cereal_bowlsperweek	IVW(MRE)	35	-8.95323e-06	0.000231996	(0, 0)	0.97	0.984478
THICK_middletemporal	cereal_bowlsperweek	IVW(MRE)	10	-0.00651869	0.129876	(-0.26, 0.25)	0.96	0.984478
THICK_pericalcarine	cereal_bowlsperweek	IVW(MRE)	18	-0.022531	0.108174	(-0.23, 0.19)	0.84	0.984478
THICK_superiorfrontal	cereal_bowlsperweek	IVW(MRE)	22	-0.0124369	0.0936477	(-0.2, 0.17)	0.89	0.984478
SA_paracentral	cereal_bowlsperweek	IVW(MRE)	26	9.74342e-07	5.53074e-05	(0, 0)	0.99	0.99
SA_lingual	cheese_overallfreq	IVW(MRE)	39	-7.2713e-05	3.60251e-05	(0, 0)	0.044	0.582857
SA_paracentral	cheese_overallfreq	IVW(MRE)	26	-0.000133608	7.19923e-05	(0, 0)	0.06	0.582857
SA_pericalcarine	cheese_overallfreq	IVW(MRE)	39	-0.00012655	6.68199e-05	(0, 0)	0.06	0.582857
THICK_parahippocampal	cheese_overallfreq	IVW(MRE)	26	-0.0960305	0.0483761	(-0.19, 0)	0.047	0.582857
THICK_parsopercularis	cheese_overallfreq	IVW(MRE)	16	0.25335	0.128422	(0, 0.51)	0.049	0.582857
THICK_parstriangularis	cheese_overallfreq	IVW(MRE)	18	-0.334668	0.133599	(-0.6, -0.07)	0.012	0.582857
THICK_superiortemporal	cheese_overallfreq	IVW(MRE)	11	-0.321068	0.157805	(-0.63, -0.01)	0.042	0.582857
SA_caudalanteriorcingulate	cheese_overallfreq	IVW(MRE)	15	-0.000155916	0.000173831	(0, 0)	0.37	0.863784
SA_caudalmiddlefrontal	cheese_overallfreq	IVW(MRE)	28	2.77814e-05	3.26927e-05	(0, 0)	0.4	0.863784
SA_cuneus	cheese_overallfreq	IVW(MRE)	23	-0.000142966	8.86774e-05	(0, 0)	0.11	0.863784
SA_inferiortemporal	cheese_overallfreq	IVW(MRE)	27	-4.65846e-05	4.37565e-05	(0, 0)	0.29	0.863784
SA_insula	cheese_overallfreq	IVW(MRE)	29	5.75638e-05	6.67977e-05	(0, 0)	0.39	0.863784
SA_lateraloccipital	cheese_overallfreq	IVW(MRE)	20	-3.42754e-05	4.34321e-05	(0, 0)	0.43	0.863784
SA_lateralorbitofrontal	cheese_overallfreq	IVW(MRE)	24	6.1115e-05	6.60907e-05	(0, 0)	0.36	0.863784
SA_middletemporal	cheese_overallfreq	IVW(MRE)	22	-3.3217e-05	4.33286e-05	(0, 0)	0.44	0.863784
SA_parsopercularis	cheese_overallfreq	IVW(MRE)	20	9.96768e-05	7.33003e-05	(0, 0)	0.17	0.863784
SA_parstriangularis	cheese_overallfreq	IVW(MRE)	27	-5.75507e-05	5.17088e-05	(0, 0)	0.27	0.863784
SA_postcentral	cheese_overallfreq	IVW(MRE)	21	-5.21465e-05	4.23759e-05	(0, 0)	0.22	0.863784
SA_posteriorcingulate	cheese_overallfreq	IVW(MRE)	24	-0.00013337	9.60417e-05	(0, 0)	0.16	0.863784
SA_precentral	cheese_overallfreq	IVW(MRE)	25	2.38638e-05	2.78085e-05	(0, 0)	0.39	0.863784
SA_rostralmiddlefrontal	cheese_overallfreq	IVW(MRE)	30	-2.05724e-05	2.87071e-05	(0, 0)	0.47	0.863784
SA_superiorparietal	cheese_overallfreq	IVW(MRE)	28	3.04178e-05	2.68982e-05	(0, 0)	0.26	0.863784
SA_temporalpole	cheese_overallfreq	IVW(MRE)	15	0.000509294	0.000441067	(0, 0)	0.25	0.863784
THICK_cuneus	cheese_overallfreq	IVW(MRE)	8	0.319464	0.375518	(-0.42, 1.06)	0.39	0.863784
THICK_entorhinal	cheese_overallfreq	IVW(MRE)	9	0.0469883	0.0582275	(-0.07, 0.16)	0.42	0.863784
THICK_frontalpole	cheese_overallfreq	IVW(MRE)	12	-0.0365844	0.0333288	(-0.1, 0.03)	0.27	0.863784
THICK_fusiform	cheese_overallfreq	IVW(MRE)	8	0.0858502	0.0702949	(-0.05, 0.22)	0.22	0.863784
THICK_isthmuscingulate	cheese_overallfreq	IVW(MRE)	28	0.0721332	0.0745832	(-0.07, 0.22)	0.33	0.863784
THICK_lateraloccipital	cheese_overallfreq	IVW(MRE)	13	-0.181038	0.185693	(-0.54, 0.18)	0.33	0.863784
THICK_medialorbitofrontal	cheese_overallfreq	IVW(MRE)	14	0.120115	0.0858378	(-0.05, 0.29)	0.16	0.863784
THICK_middletemporal	cheese_overallfreq	IVW(MRE)	10	-0.134153	0.177733	(-0.48, 0.21)	0.45	0.863784
THICK_pericalcarine	cheese_overallfreq	IVW(MRE)	18	-0.188682	0.12431	(-0.43, 0.05)	0.13	0.863784
THICK_precentral	cheese_overallfreq	IVW(MRE)	14	0.157117	0.146184	(-0.13, 0.44)	0.28	0.863784
THICK_precuneus	cheese_overallfreq	IVW(MRE)	20	0.11899	0.16235	(-0.2, 0.44)	0.46	0.863784
THICK_rostralanteriorcingulate	cheese_overallfreq	IVW(MRE)	23	-0.0777511	0.072531	(-0.22, 0.06)	0.28	0.863784
THICK_rostralmiddlefrontal	cheese_overallfreq	IVW(MRE)	14	0.208029	0.215961	(-0.22, 0.63)	0.34	0.863784
THICK_supramarginal	cheese_overallfreq	IVW(MRE)	20	0.141627	0.160247	(-0.17, 0.46)	0.38	0.863784
THICK_paracentral	cheese_overallfreq	IVW(MRE)	14	-0.12132	0.178724	(-0.47, 0.23)	0.5	0.894737
SA_rostralanteriorcingulate	cheese_overallfreq	IVW(MRE)	16	0.000121342	0.000198923	(0, 0)	0.54	0.89561
SA_superiorfrontal	cheese_overallfreq	IVW(MRE)	23	2.01474e-05	3.26842e-05	(0, 0)	0.54	0.89561
THICK_lateralorbitofrontal	cheese_overallfreq	IVW(MRE)	7	0.0733163	0.113832	(-0.15, 0.3)	0.52	0.89561
THICK_inferiorparietal	cheese_overallfreq	IVW(MRE)	13	0.110017	0.195563	(-0.27, 0.49)	0.57	0.922857
THICK_caudalanteriorcingulate	cheese_overallfreq	IVW(MRE)	10	-0.0391186	0.0779667	(-0.19, 0.11)	0.62	0.958182
THICK_insula	cheese_overallfreq	IVW(MRE)	14	-0.0874747	0.172443	(-0.43, 0.25)	0.61	0.958182
SA_bankssts	cheese_overallfreq	IVW(MRE)	19	4.23175e-05	0.000106066	(0, 0)	0.69	0.971429
SA_entorhinal	cheese_overallfreq	IVW(MRE)	15	3.57804e-05	0.000249296	(0, 0)	0.89	0.971429
SA_frontalpole	cheese_overallfreq	IVW(MRE)	11	0.000112427	0.0003104	(0, 0)	0.72	0.971429
SA_inferiorparietal	cheese_overallfreq	IVW(MRE)	31	2.3101e-06	1.90707e-05	(0, 0)	0.9	0.971429
SA_medialorbitofrontal	cheese_overallfreq	IVW(MRE)	10	4.22626e-05	0.000179964	(0, 0)	0.81	0.971429
SA_parahippocampal	cheese_overallfreq	IVW(MRE)	15	2.5571e-05	0.000163859	(0, 0)	0.88	0.971429
SA_parsorbitalis	cheese_overallfreq	IVW(MRE)	12	-5.28419e-05	0.000355388	(0, 0)	0.88	0.971429
SA_precuneus	cheese_overallfreq	IVW(MRE)	31	-1.11512e-05	4.40633e-05	(0, 0)	0.8	0.971429
SA_supramarginal	cheese_overallfreq	IVW(MRE)	24	4.10227e-06	2.69826e-05	(0, 0)	0.88	0.971429
SA_transversetemporal	cheese_overallfreq	IVW(MRE)	35	3.37906e-05	0.00025839	(0, 0)	0.9	0.971429
THICK_bankssts	cheese_overallfreq	IVW(MRE)	12	0.0327274	0.0967704	(-0.16, 0.22)	0.74	0.971429
THICK_caudalmiddlefrontal	cheese_overallfreq	IVW(MRE)	12	-0.0354201	0.122587	(-0.28, 0.2)	0.77	0.971429
THICK_inferiortemporal	cheese_overallfreq	IVW(MRE)	18	0.0228482	0.120841	(-0.21, 0.26)	0.85	0.971429
THICK_lingual	cheese_overallfreq	IVW(MRE)	14	0.0345301	0.236982	(-0.43, 0.5)	0.88	0.971429
THICK_parsorbitalis	cheese_overallfreq	IVW(MRE)	12	0.0179618	0.0649291	(-0.11, 0.15)	0.78	0.971429
THICK_postcentral	cheese_overallfreq	IVW(MRE)	24	0.0162547	0.132905	(-0.24, 0.28)	0.9	0.971429
THICK_posteriorcingulate	cheese_overallfreq	IVW(MRE)	13	0.0633271	0.161196	(-0.25, 0.38)	0.69	0.971429
THICK_superiorparietal	cheese_overallfreq	IVW(MRE)	14	0.0665478	0.174356	(-0.28, 0.41)	0.7	0.971429
THICK_temporalpole	cheese_overallfreq	IVW(MRE)	6	0.0501628	0.109135	(-0.16, 0.26)	0.65	0.971429
SA_superiortemporal	cheese_overallfreq	IVW(MRE)	22	7.12299e-06	6.78665e-05	(0, 0)	0.92	0.9775
THICK_superiorfrontal	cheese_overallfreq	IVW(MRE)	22	-0.0128131	0.178078	(-0.36, 0.34)	0.94	0.983385
SA_fusiform	cheese_overallfreq	IVW(MRE)	19	-4.36208e-07	6.70713e-05	(0, 0)	0.99	0.99
SA_isthmuscingulate	cheese_overallfreq	IVW(MRE)	20	2.59508e-06	0.000118809	(0, 0)	0.98	0.99
THICK_transversetemporal	cheese_overallfreq	IVW(MRE)	12	-0.00173247	0.0792696	(-0.16, 0.15)	0.98	0.99
THICK_lateraloccipital	coffee_cupsperday	IVW(MRE)	13	-0.475018	0.117768	(-0.71, -0.24)	5.5e-05	0.00374
THICK_lateralorbitofrontal	coffee_cupsperday	IVW(MRE)	7	-0.290107	0.0821928	(-0.45, -0.13)	0.00042	0.01428
SA_posteriorcingulate	coffee_cupsperday	IVW(MRE)	24	-0.000287067	0.000101189	(0, 0)	0.0046	0.104267
SA_inferiortemporal	coffee_cupsperday	IVW(MRE)	27	-5.1428e-05	2.66892e-05	(0, 0)	0.05	0.485714
SA_parstriangularis	coffee_cupsperday	IVW(MRE)	27	-9.91307e-05	4.68797e-05	(0, 0)	0.034	0.485714
THICK_inferiortemporal	coffee_cupsperday	IVW(MRE)	18	-0.168018	0.0872102	(-0.34, 0)	0.05	0.485714
THICK_middletemporal	coffee_cupsperday	IVW(MRE)	10	0.160265	0.0806521	(0, 0.32)	0.047	0.485714
SA_lateraloccipital	coffee_cupsperday	IVW(MRE)	20	-0.000130387	7.91362e-05	(0, 0)	0.1	0.498667
SA_parsopercularis	coffee_cupsperday	IVW(MRE)	20	0.000126418	7.67013e-05	(0, 0)	0.1	0.498667
SA_postcentral	coffee_cupsperday	IVW(MRE)	21	5.93013e-05	3.70839e-05	(0, 0)	0.11	0.498667
SA_rostralmiddlefrontal	coffee_cupsperday	IVW(MRE)	30	-3.98835e-05	2.33486e-05	(0, 0)	0.09	0.498667
THICK_entorhinal	coffee_cupsperday	IVW(MRE)	9	0.116174	0.0734809	(-0.03, 0.26)	0.11	0.498667
THICK_inferiorparietal	coffee_cupsperday	IVW(MRE)	13	-0.281361	0.174443	(-0.62, 0.06)	0.11	0.498667
THICK_precentral	coffee_cupsperday	IVW(MRE)	14	-0.222628	0.138351	(-0.49, 0.05)	0.11	0.498667
THICK_supramarginal	coffee_cupsperday	IVW(MRE)	20	0.260026	0.148914	(-0.03, 0.55)	0.08	0.498667
SA_bankssts	coffee_cupsperday	IVW(MRE)	19	0.000353735	0.000227349	(0, 0)	0.12	0.51
SA_superiorparietal	coffee_cupsperday	IVW(MRE)	28	3.19451e-05	2.20951e-05	(0, 0)	0.15	0.6
SA_precentral	coffee_cupsperday	IVW(MRE)	25	3.84814e-05	2.77688e-05	(0, 0)	0.17	0.608421
THICK_posteriorcingulate	coffee_cupsperday	IVW(MRE)	13	-0.151613	0.111124	(-0.37, 0.07)	0.17	0.608421
THICK_superiorfrontal	coffee_cupsperday	IVW(MRE)	22	0.181914	0.141412	(-0.1, 0.46)	0.2	0.68
SA_caudalanteriorcingulate	coffee_cupsperday	IVW(MRE)	15	-0.000171014	0.00014106	(0, 0)	0.23	0.744762
SA_middletemporal	coffee_cupsperday	IVW(MRE)	22	5.05139e-05	4.85595e-05	(0, 0)	0.3	0.878333
THICK_rostralmiddlefrontal	coffee_cupsperday	IVW(MRE)	14	-0.143392	0.141943	(-0.42, 0.13)	0.31	0.878333
THICK_transversetemporal	coffee_cupsperday	IVW(MRE)	12	0.0876838	0.0821278	(-0.07, 0.25)	0.29	0.878333
SA_transversetemporal	coffee_cupsperday	IVW(MRE)	35	0.000190958	0.000202626	(0, 0)	0.35	0.881482
THICK_caudalmiddlefrontal	coffee_cupsperday	IVW(MRE)	12	0.16537	0.172051	(-0.17, 0.5)	0.34	0.881482
THICK_lingual	coffee_cupsperday	IVW(MRE)	14	-0.175836	0.179145	(-0.53, 0.18)	0.33	0.881482
SA_cuneus	coffee_cupsperday	IVW(MRE)	23	-7.31777e-05	8.56243e-05	(0, 0)	0.39	0.884
SA_lingual	coffee_cupsperday	IVW(MRE)	39	-2.4532e-05	2.83803e-05	(0, 0)	0.39	0.884
SA_supramarginal	coffee_cupsperday	IVW(MRE)	24	2.2285e-05	2.57646e-05	(0, 0)	0.39	0.884
SA_isthmuscingulate	coffee_cupsperday	IVW(MRE)	20	8.32176e-05	0.000106484	(0, 0)	0.43	0.9
SA_lateralorbitofrontal	coffee_cupsperday	IVW(MRE)	24	4.99289e-05	6.6664e-05	(0, 0)	0.45	0.9
SA_precuneus	coffee_cupsperday	IVW(MRE)	31	-2.81382e-05	3.6442e-05	(0, 0)	0.44	0.9
THICK_medialorbitofrontal	coffee_cupsperday	IVW(MRE)	14	0.0720752	0.0929976	(-0.11, 0.25)	0.44	0.9
SA_entorhinal	coffee_cupsperday	IVW(MRE)	15	0.000133051	0.000195539	(0, 0)	0.5	0.912632
SA_fusiform	coffee_cupsperday	IVW(MRE)	19	-3.45449e-05	5.2826e-05	(0, 0)	0.51	0.912632
THICK_cuneus	coffee_cupsperday	IVW(MRE)	8	0.118329	0.181671	(-0.24, 0.47)	0.51	0.912632
THICK_insula	coffee_cupsperday	IVW(MRE)	14	0.12034	0.170558	(-0.21, 0.45)	0.48	0.912632
SA_superiortemporal	coffee_cupsperday	IVW(MRE)	22	3.50439e-05	5.87747e-05	(0, 0)	0.55	0.922857
THICK_caudalanteriorcingulate	coffee_cupsperday	IVW(MRE)	10	-0.0531416	0.0884974	(-0.23, 0.12)	0.55	0.922857
THICK_parahippocampal	coffee_cupsperday	IVW(MRE)	26	-0.0276124	0.0479888	(-0.12, 0.07)	0.57	0.922857
THICK_parsorbitalis	coffee_cupsperday	IVW(MRE)	12	-0.0548219	0.0971407	(-0.25, 0.14)	0.57	0.922857
SA_paracentral	coffee_cupsperday	IVW(MRE)	26	-2.3233e-05	5.90917e-05	(0, 0)	0.69	0.933333
SA_parsorbitalis	coffee_cupsperday	IVW(MRE)	12	-8.84378e-05	0.000230366	(0, 0)	0.7	0.933333
SA_superiorfrontal	coffee_cupsperday	IVW(MRE)	23	7.9002e-06	1.69493e-05	(0, 0)	0.64	0.933333
THICK_paracentral	coffee_cupsperday	IVW(MRE)	14	0.0582572	0.148424	(-0.23, 0.35)	0.69	0.933333
THICK_parstriangularis	coffee_cupsperday	IVW(MRE)	18	0.064377	0.127013	(-0.18, 0.31)	0.61	0.933333
THICK_postcentral	coffee_cupsperday	IVW(MRE)	24	0.0428462	0.101932	(-0.16, 0.24)	0.67	0.933333
THICK_precuneus	coffee_cupsperday	IVW(MRE)	20	-0.102326	0.194905	(-0.48, 0.28)	0.6	0.933333
THICK_rostralanteriorcingulate	coffee_cupsperday	IVW(MRE)	23	0.025207	0.0556361	(-0.08, 0.13)	0.65	0.933333
THICK_temporalpole	coffee_cupsperday	IVW(MRE)	6	0.0282541	0.0651624	(-0.1, 0.16)	0.66	0.933333
THICK_superiorparietal	coffee_cupsperday	IVW(MRE)	14	-0.0656758	0.181347	(-0.42, 0.29)	0.72	0.941538
SA_medialorbitofrontal	coffee_cupsperday	IVW(MRE)	10	-2.50048e-05	7.4766e-05	(0, 0)	0.74	0.949434
SA_frontalpole	coffee_cupsperday	IVW(MRE)	11	-0.000153072	0.00064269	(0, 0)	0.81	0.968485
SA_inferiorparietal	coffee_cupsperday	IVW(MRE)	31	-3.18211e-06	1.74188e-05	(0, 0)	0.86	0.968485
SA_insula	coffee_cupsperday	IVW(MRE)	29	6.41295e-06	6.51863e-05	(0, 0)	0.92	0.968485
SA_pericalcarine	coffee_cupsperday	IVW(MRE)	39	-3.13113e-06	4.16789e-05	(0, 0)	0.94	0.968485
SA_rostralanteriorcingulate	coffee_cupsperday	IVW(MRE)	16	1.50623e-05	0.000121299	(0, 0)	0.9	0.968485
SA_temporalpole	coffee_cupsperday	IVW(MRE)	15	2.87835e-05	0.000210237	(0, 0)	0.89	0.968485
THICK_bankssts	coffee_cupsperday	IVW(MRE)	12	0.0183372	0.116942	(-0.21, 0.25)	0.88	0.968485
THICK_frontalpole	coffee_cupsperday	IVW(MRE)	12	0.00868995	0.0525653	(-0.09, 0.11)	0.87	0.968485
THICK_fusiform	coffee_cupsperday	IVW(MRE)	8	-0.0161545	0.170546	(-0.35, 0.32)	0.92	0.968485
THICK_isthmuscingulate	coffee_cupsperday	IVW(MRE)	28	0.00481133	0.0581251	(-0.11, 0.12)	0.93	0.968485
THICK_parsopercularis	coffee_cupsperday	IVW(MRE)	16	0.0234429	0.163985	(-0.3, 0.34)	0.89	0.968485
THICK_pericalcarine	coffee_cupsperday	IVW(MRE)	18	0.0138905	0.0863525	(-0.16, 0.18)	0.87	0.968485
THICK_superiortemporal	coffee_cupsperday	IVW(MRE)	11	0.017631	0.142504	(-0.26, 0.3)	0.9	0.968485
SA_caudalmiddlefrontal	coffee_cupsperday	IVW(MRE)	28	-1.468e-06	2.86381e-05	(0, 0)	0.96	0.974328
SA_parahippocampal	coffee_cupsperday	IVW(MRE)	15	5.79301e-06	0.000214648	(0, 0)	0.98	0.98
SA_cuneus	cookedveg_TBSperday	IVW(MRE)	23	-0.000107942	6.49559e-05	(0, 0)	0.1	0.68
SA_frontalpole	cookedveg_TBSperday	IVW(MRE)	11	-0.000483054	0.000240954	(0, 0)	0.045	0.68
SA_insula	cookedveg_TBSperday	IVW(MRE)	29	-0.000111786	5.97983e-05	(0, 0)	0.06	0.68
SA_paracentral	cookedveg_TBSperday	IVW(MRE)	26	-0.000103107	7.68882e-05	(0, 0)	0.18	0.68
SA_parsopercularis	cookedveg_TBSperday	IVW(MRE)	20	8.74534e-05	6.86251e-05	(0, 0)	0.2	0.68
SA_parsorbitalis	cookedveg_TBSperday	IVW(MRE)	12	0.000516707	0.000234875	(0, 0)	0.028	0.68
SA_rostralmiddlefrontal	cookedveg_TBSperday	IVW(MRE)	30	-5.3533e-05	3.27946e-05	(0, 0)	0.1	0.68
SA_superiorparietal	cookedveg_TBSperday	IVW(MRE)	28	3.74343e-05	2.00017e-05	(0, 0)	0.06	0.68
SA_superiortemporal	cookedveg_TBSperday	IVW(MRE)	22	-0.000100809	6.341e-05	(0, 0)	0.11	0.68
SA_supramarginal	cookedveg_TBSperday	IVW(MRE)	24	4.34721e-05	3.08306e-05	(0, 0)	0.16	0.68
THICK_bankssts	cookedveg_TBSperday	IVW(MRE)	12	0.192837	0.141425	(-0.08, 0.47)	0.17	0.68
THICK_frontalpole	cookedveg_TBSperday	IVW(MRE)	12	0.0494825	0.0306346	(-0.01, 0.11)	0.11	0.68
THICK_medialorbitofrontal	cookedveg_TBSperday	IVW(MRE)	14	-0.0857543	0.0545908	(-0.19, 0.02)	0.12	0.68
THICK_paracentral	cookedveg_TBSperday	IVW(MRE)	14	0.104774	0.0844893	(-0.06, 0.27)	0.21	0.68
THICK_parahippocampal	cookedveg_TBSperday	IVW(MRE)	26	-0.0424452	0.0336491	(-0.11, 0.02)	0.21	0.68
THICK_parsopercularis	cookedveg_TBSperday	IVW(MRE)	16	0.173882	0.122846	(-0.07, 0.41)	0.16	0.68
THICK_pericalcarine	cookedveg_TBSperday	IVW(MRE)	18	0.136544	0.110663	(-0.08, 0.35)	0.22	0.68
THICK_postcentral	cookedveg_TBSperday	IVW(MRE)	24	-0.232551	0.129052	(-0.49, 0.02)	0.07	0.68
THICK_precentral	cookedveg_TBSperday	IVW(MRE)	14	0.399588	0.184945	(0.04, 0.76)	0.031	0.68
THICK_rostralmiddlefrontal	cookedveg_TBSperday	IVW(MRE)	14	0.221418	0.148428	(-0.07, 0.51)	0.14	0.68
THICK_superiorparietal	cookedveg_TBSperday	IVW(MRE)	14	0.239235	0.173666	(-0.1, 0.58)	0.17	0.68
THICK_supramarginal	cookedveg_TBSperday	IVW(MRE)	20	0.215732	0.160854	(-0.1, 0.53)	0.18	0.68
SA_parstriangularis	cookedveg_TBSperday	IVW(MRE)	27	-7.12003e-05	6.47353e-05	(0, 0)	0.27	0.765
THICK_isthmuscingulate	cookedveg_TBSperday	IVW(MRE)	28	-0.0697274	0.0628632	(-0.19, 0.05)	0.27	0.765
SA_lateralorbitofrontal	cookedveg_TBSperday	IVW(MRE)	24	5.67947e-05	5.64292e-05	(0, 0)	0.31	0.773793
SA_medialorbitofrontal	cookedveg_TBSperday	IVW(MRE)	10	-0.000107951	0.000104397	(0, 0)	0.3	0.773793
SA_posteriorcingulate	cookedveg_TBSperday	IVW(MRE)	24	0.000118699	0.000120595	(0, 0)	0.32	0.773793
SA_transversetemporal	cookedveg_TBSperday	IVW(MRE)	35	-0.000194308	0.00020032	(0, 0)	0.33	0.773793
THICK_fusiform	cookedveg_TBSperday	IVW(MRE)	8	-0.22666	0.213426	(-0.64, 0.19)	0.29	0.773793
SA_caudalanteriorcingulate	cookedveg_TBSperday	IVW(MRE)	15	-0.000112514	0.000139789	(0, 0)	0.42	0.865455
SA_entorhinal	cookedveg_TBSperday	IVW(MRE)	15	-0.000239983	0.000289547	(0, 0)	0.41	0.865455
SA_superiorfrontal	cookedveg_TBSperday	IVW(MRE)	23	2.52385e-05	2.97008e-05	(0, 0)	0.4	0.865455
THICK_cuneus	cookedveg_TBSperday	IVW(MRE)	8	-0.1436	0.177348	(-0.49, 0.2)	0.42	0.865455
SA_caudalmiddlefrontal	cookedveg_TBSperday	IVW(MRE)	28	-2.68724e-05	3.52649e-05	(0, 0)	0.45	0.874286
THICK_entorhinal	cookedveg_TBSperday	IVW(MRE)	9	-0.0521282	0.0692716	(-0.19, 0.08)	0.45	0.874286
THICK_middletemporal	cookedveg_TBSperday	IVW(MRE)	10	-0.0660771	0.10287	(-0.27, 0.14)	0.52	0.955676
THICK_superiortemporal	cookedveg_TBSperday	IVW(MRE)	11	0.104469	0.160006	(-0.21, 0.42)	0.51	0.955676
THICK_lateralorbitofrontal	cookedveg_TBSperday	IVW(MRE)	7	0.109408	0.176465	(-0.24, 0.46)	0.54	0.966316
SA_bankssts	cookedveg_TBSperday	IVW(MRE)	19	-3.02163e-05	9.66228e-05	(0, 0)	0.75	0.969836
SA_fusiform	cookedveg_TBSperday	IVW(MRE)	19	-2.67597e-05	6.45702e-05	(0, 0)	0.68	0.969836
SA_inferiorparietal	cookedveg_TBSperday	IVW(MRE)	31	1.09352e-05	2.03274e-05	(0, 0)	0.59	0.969836
SA_inferiortemporal	cookedveg_TBSperday	IVW(MRE)	27	1.64444e-05	3.38081e-05	(0, 0)	0.63	0.969836
SA_isthmuscingulate	cookedveg_TBSperday	IVW(MRE)	20	-3.91051e-05	9.74226e-05	(0, 0)	0.69	0.969836
SA_lingual	cookedveg_TBSperday	IVW(MRE)	39	5.6979e-06	2.78785e-05	(0, 0)	0.84	0.969836
SA_parahippocampal	cookedveg_TBSperday	IVW(MRE)	15	-2.54754e-05	0.000115851	(0, 0)	0.83	0.969836
SA_pericalcarine	cookedveg_TBSperday	IVW(MRE)	39	1.03645e-05	3.83353e-05	(0, 0)	0.79	0.969836
SA_precuneus	cookedveg_TBSperday	IVW(MRE)	31	-9.57765e-06	3.27721e-05	(0, 0)	0.77	0.969836
SA_rostralanteriorcingulate	cookedveg_TBSperday	IVW(MRE)	16	3.03747e-05	0.00011324	(0, 0)	0.79	0.969836
SA_temporalpole	cookedveg_TBSperday	IVW(MRE)	15	8.24777e-05	0.000298655	(0, 0)	0.78	0.969836
THICK_caudalmiddlefrontal	cookedveg_TBSperday	IVW(MRE)	12	0.0585539	0.219973	(-0.37, 0.49)	0.79	0.969836
THICK_inferiorparietal	cookedveg_TBSperday	IVW(MRE)	13	-0.074551	0.212362	(-0.49, 0.34)	0.73	0.969836
THICK_inferiortemporal	cookedveg_TBSperday	IVW(MRE)	18	-0.0320737	0.0783933	(-0.19, 0.12)	0.68	0.969836
THICK_insula	cookedveg_TBSperday	IVW(MRE)	14	-0.0238078	0.128315	(-0.28, 0.23)	0.85	0.969836
THICK_lateraloccipital	cookedveg_TBSperday	IVW(MRE)	13	0.0290778	0.169355	(-0.3, 0.36)	0.86	0.969836
THICK_lingual	cookedveg_TBSperday	IVW(MRE)	14	0.113368	0.213621	(-0.31, 0.53)	0.6	0.969836
THICK_parsorbitalis	cookedveg_TBSperday	IVW(MRE)	12	-0.0184976	0.0429888	(-0.1, 0.07)	0.67	0.969836
THICK_posteriorcingulate	cookedveg_TBSperday	IVW(MRE)	13	-0.032734	0.202018	(-0.43, 0.36)	0.87	0.969836
THICK_precuneus	cookedveg_TBSperday	IVW(MRE)	20	-0.0622957	0.162668	(-0.38, 0.26)	0.7	0.969836
THICK_rostralanteriorcingulate	cookedveg_TBSperday	IVW(MRE)	23	-0.015176	0.0447652	(-0.1, 0.07)	0.73	0.969836
THICK_superiorfrontal	cookedveg_TBSperday	IVW(MRE)	22	-0.0302327	0.135291	(-0.3, 0.23)	0.82	0.969836
THICK_temporalpole	cookedveg_TBSperday	IVW(MRE)	6	0.041982	0.0791733	(-0.11, 0.2)	0.6	0.969836
THICK_parstriangularis	cookedveg_TBSperday	IVW(MRE)	18	0.0118513	0.0962479	(-0.18, 0.2)	0.9	0.971429
THICK_transversetemporal	cookedveg_TBSperday	IVW(MRE)	12	0.0154343	0.119816	(-0.22, 0.25)	0.9	0.971429
SA_lateraloccipital	cookedveg_TBSperday	IVW(MRE)	20	-8.85517e-07	2.80981e-05	(0, 0)	0.97	0.984478
SA_middletemporal	cookedveg_TBSperday	IVW(MRE)	22	-1.69562e-06	4.69815e-05	(0, 0)	0.97	0.984478
SA_postcentral	cookedveg_TBSperday	IVW(MRE)	21	-2.54671e-06	4.26737e-05	(0, 0)	0.95	0.984478
SA_precentral	cookedveg_TBSperday	IVW(MRE)	25	1.84284e-06	2.76662e-05	(0, 0)	0.95	0.984478
THICK_caudalanteriorcingulate	cookedveg_TBSperday	IVW(MRE)	10	0.000850074	0.0698675	(-0.14, 0.14)	0.99	0.99
THICK_entorhinal	doyouaddsalt	IVW(MRE)	9	0.100813	0.0347824	(0.03, 0.17)	0.0038	0.1394
THICK_temporalpole	doyouaddsalt	IVW(MRE)	6	-0.0715109	0.0249355	(-0.12, -0.02)	0.0041	0.1394
SA_fusiform	doyouaddsalt	IVW(MRE)	19	6.92599e-05	2.74335e-05	(0, 0)	0.012	0.272
SA_inferiortemporal	doyouaddsalt	IVW(MRE)	27	5.71773e-05	3.52409e-05	(0, 0)	0.1	0.566667
SA_insula	doyouaddsalt	IVW(MRE)	29	-0.000139853	7.27058e-05	(0, 0)	0.05	0.566667
SA_lingual	doyouaddsalt	IVW(MRE)	39	6.8653e-05	3.63949e-05	(0, 0)	0.06	0.566667
SA_medialorbitofrontal	doyouaddsalt	IVW(MRE)	10	0.000170554	9.2245e-05	(0, 0)	0.06	0.566667
SA_precuneus	doyouaddsalt	IVW(MRE)	31	6.09136e-05	3.38422e-05	(0, 0)	0.07	0.566667
SA_superiorfrontal	doyouaddsalt	IVW(MRE)	23	-4.55036e-05	2.8003e-05	(0, 0)	0.1	0.566667
SA_temporalpole	doyouaddsalt	IVW(MRE)	15	0.000295289	0.000177627	(0, 0)	0.1	0.566667
THICK_cuneus	doyouaddsalt	IVW(MRE)	8	-0.159278	0.0944009	(-0.34, 0.03)	0.09	0.566667
THICK_medialorbitofrontal	doyouaddsalt	IVW(MRE)	14	-0.166751	0.0985795	(-0.36, 0.03)	0.09	0.566667
THICK_rostralanteriorcingulate	doyouaddsalt	IVW(MRE)	23	-0.130122	0.0827208	(-0.29, 0.03)	0.12	0.627692
SA_parstriangularis	doyouaddsalt	IVW(MRE)	27	-5.66441e-05	3.98826e-05	(0, 0)	0.16	0.64
THICK_caudalmiddlefrontal	doyouaddsalt	IVW(MRE)	12	0.222017	0.153378	(-0.08, 0.52)	0.15	0.64
THICK_fusiform	doyouaddsalt	IVW(MRE)	8	-0.281587	0.2023	(-0.68, 0.11)	0.16	0.64
THICK_parstriangularis	doyouaddsalt	IVW(MRE)	18	-0.178705	0.122437	(-0.42, 0.06)	0.14	0.64
SA_caudalanteriorcingulate	doyouaddsalt	IVW(MRE)	15	0.000244435	0.000178955	(0, 0)	0.17	0.642222
SA_parahippocampal	doyouaddsalt	IVW(MRE)	15	-0.000221565	0.00017457	(0, 0)	0.2	0.68
SA_rostralmiddlefrontal	doyouaddsalt	IVW(MRE)	30	-3.08028e-05	2.32735e-05	(0, 0)	0.19	0.68
THICK_precentral	doyouaddsalt	IVW(MRE)	14	-0.221834	0.183666	(-0.58, 0.14)	0.23	0.744762
SA_parsorbitalis	doyouaddsalt	IVW(MRE)	12	0.000333342	0.000325798	(0, 0)	0.31	0.750345
SA_postcentral	doyouaddsalt	IVW(MRE)	21	5.88231e-05	5.51231e-05	(0, 0)	0.29	0.750345
SA_superiortemporal	doyouaddsalt	IVW(MRE)	22	-4.14964e-05	3.85568e-05	(0, 0)	0.28	0.750345
THICK_caudalanteriorcingulate	doyouaddsalt	IVW(MRE)	10	0.0823858	0.071887	(-0.06, 0.22)	0.25	0.750345
THICK_insula	doyouaddsalt	IVW(MRE)	14	-0.16066	0.14998	(-0.45, 0.13)	0.28	0.750345
THICK_middletemporal	doyouaddsalt	IVW(MRE)	10	0.16647	0.164238	(-0.16, 0.49)	0.31	0.750345
THICK_rostralmiddlefrontal	doyouaddsalt	IVW(MRE)	14	-0.170861	0.158038	(-0.48, 0.14)	0.28	0.750345
THICK_superiortemporal	doyouaddsalt	IVW(MRE)	11	0.170281	0.169947	(-0.16, 0.5)	0.32	0.750345
SA_cuneus	doyouaddsalt	IVW(MRE)	23	-8.40231e-05	9.31013e-05	(0, 0)	0.37	0.757714
SA_paracentral	doyouaddsalt	IVW(MRE)	26	5.46458e-05	6.19849e-05	(0, 0)	0.38	0.757714
SA_parsopercularis	doyouaddsalt	IVW(MRE)	20	-6.69572e-05	7.05251e-05	(0, 0)	0.34	0.757714
SA_posteriorcingulate	doyouaddsalt	IVW(MRE)	24	-8.02052e-05	9.07483e-05	(0, 0)	0.38	0.757714
SA_supramarginal	doyouaddsalt	IVW(MRE)	24	2.939e-05	3.34694e-05	(0, 0)	0.38	0.757714
THICK_transversetemporal	doyouaddsalt	IVW(MRE)	12	-0.0721948	0.0841594	(-0.24, 0.09)	0.39	0.757714
SA_superiorparietal	doyouaddsalt	IVW(MRE)	28	2.01408e-05	2.85448e-05	(0, 0)	0.48	0.858947
THICK_frontalpole	doyouaddsalt	IVW(MRE)	12	-0.0688431	0.0924029	(-0.25, 0.11)	0.46	0.858947
THICK_parsorbitalis	doyouaddsalt	IVW(MRE)	12	0.111795	0.159413	(-0.2, 0.42)	0.48	0.858947
THICK_superiorparietal	doyouaddsalt	IVW(MRE)	14	-0.106982	0.167538	(-0.44, 0.22)	0.52	0.884
THICK_supramarginal	doyouaddsalt	IVW(MRE)	20	0.105307	0.160301	(-0.21, 0.42)	0.51	0.884
THICK_posteriorcingulate	doyouaddsalt	IVW(MRE)	13	-0.0598502	0.0970753	(-0.25, 0.13)	0.54	0.89561
SA_bankssts	doyouaddsalt	IVW(MRE)	19	5.23723e-05	0.000138524	(0, 0)	0.71	0.964179
SA_caudalmiddlefrontal	doyouaddsalt	IVW(MRE)	28	-7.95237e-06	4.37817e-05	(0, 0)	0.86	0.964179
SA_entorhinal	doyouaddsalt	IVW(MRE)	15	1.36633e-05	0.000222061	(0, 0)	0.95	0.964179
SA_frontalpole	doyouaddsalt	IVW(MRE)	11	-4.57329e-05	0.000275258	(0, 0)	0.87	0.964179
SA_inferiorparietal	doyouaddsalt	IVW(MRE)	31	7.904e-06	2.23466e-05	(0, 0)	0.72	0.964179
SA_isthmuscingulate	doyouaddsalt	IVW(MRE)	20	-2.88688e-05	0.000123617	(0, 0)	0.82	0.964179
SA_lateraloccipital	doyouaddsalt	IVW(MRE)	20	-1.38373e-05	4.31503e-05	(0, 0)	0.75	0.964179
SA_lateralorbitofrontal	doyouaddsalt	IVW(MRE)	24	8.15062e-06	6.50283e-05	(0, 0)	0.9	0.964179
SA_middletemporal	doyouaddsalt	IVW(MRE)	22	-1.37871e-05	5.38355e-05	(0, 0)	0.8	0.964179
SA_pericalcarine	doyouaddsalt	IVW(MRE)	39	1.63064e-05	5.06023e-05	(0, 0)	0.75	0.964179
SA_rostralanteriorcingulate	doyouaddsalt	IVW(MRE)	16	4.94795e-05	0.000150003	(0, 0)	0.74	0.964179
SA_transversetemporal	doyouaddsalt	IVW(MRE)	35	1.45238e-05	0.000185751	(0, 0)	0.94	0.964179
THICK_bankssts	doyouaddsalt	IVW(MRE)	12	-0.0842091	0.164906	(-0.41, 0.24)	0.61	0.964179
THICK_inferiorparietal	doyouaddsalt	IVW(MRE)	13	0.0964235	0.207432	(-0.31, 0.5)	0.64	0.964179
THICK_inferiortemporal	doyouaddsalt	IVW(MRE)	18	0.00720615	0.0848122	(-0.16, 0.17)	0.93	0.964179
THICK_isthmuscingulate	doyouaddsalt	IVW(MRE)	28	-0.00421109	0.0535379	(-0.11, 0.1)	0.94	0.964179
THICK_lateraloccipital	doyouaddsalt	IVW(MRE)	13	-0.0131816	0.120565	(-0.25, 0.22)	0.91	0.964179
THICK_lateralorbitofrontal	doyouaddsalt	IVW(MRE)	7	-0.0153707	0.120286	(-0.25, 0.22)	0.9	0.964179
THICK_lingual	doyouaddsalt	IVW(MRE)	14	0.0376003	0.242644	(-0.44, 0.51)	0.88	0.964179
THICK_paracentral	doyouaddsalt	IVW(MRE)	14	-0.0106308	0.143881	(-0.29, 0.27)	0.94	0.964179
THICK_parahippocampal	doyouaddsalt	IVW(MRE)	26	0.0156668	0.0422944	(-0.07, 0.1)	0.71	0.964179
THICK_parsopercularis	doyouaddsalt	IVW(MRE)	16	0.0609525	0.174912	(-0.28, 0.4)	0.73	0.964179
THICK_pericalcarine	doyouaddsalt	IVW(MRE)	18	-0.0354106	0.0939445	(-0.22, 0.15)	0.71	0.964179
THICK_postcentral	doyouaddsalt	IVW(MRE)	24	0.0316522	0.117013	(-0.2, 0.26)	0.79	0.964179
THICK_precuneus	doyouaddsalt	IVW(MRE)	20	-0.0193469	0.17926	(-0.37, 0.33)	0.91	0.964179
THICK_superiorfrontal	doyouaddsalt	IVW(MRE)	22	-0.0479455	0.143258	(-0.33, 0.23)	0.74	0.964179
SA_precentral	doyouaddsalt	IVW(MRE)	25	6.37429e-07	3.35357e-05	(0, 0)	0.98	0.98
SA_rostralmiddlefrontal	Fat	IVW(MRE)	28	-7.09452e-05	2.81689e-05	(0, 0)	0.012	0.408
THICK_middletemporal	Fat	IVW(MRE)	10	0.409274	0.16265	(0.09, 0.73)	0.012	0.408
SA_entorhinal	Fat	IVW(MRE)	14	-0.00041131	0.000179095	(0, 0)	0.022	0.498667
SA_insula	Fat	IVW(MRE)	27	-0.000137424	6.97262e-05	(0, 0)	0.049	0.582857
SA_middletemporal	Fat	IVW(MRE)	22	-8.71646e-05	4.57031e-05	(0, 0)	0.06	0.582857
SA_postcentral	Fat	IVW(MRE)	20	-0.000101892	5.09782e-05	(0, 0)	0.046	0.582857
THICK_caudalanteriorcingulate	Fat	IVW(MRE)	9	-0.257501	0.138351	(-0.53, 0.01)	0.06	0.582857
THICK_cuneus	Fat	IVW(MRE)	8	0.441499	0.243136	(-0.04, 0.92)	0.07	0.595
SA_temporalpole	Fat	IVW(MRE)	14	0.000594377	0.000360872	(0, 0)	0.1	0.755556
THICK_inferiortemporal	Fat	IVW(MRE)	15	0.18787	0.123995	(-0.06, 0.43)	0.13	0.884
SA_bankssts	Fat	IVW(MRE)	17	-0.000110951	0.000122578	(0, 0)	0.37	0.888387
SA_caudalanteriorcingulate	Fat	IVW(MRE)	14	0.000163806	0.000153927	(0, 0)	0.29	0.888387
SA_caudalmiddlefrontal	Fat	IVW(MRE)	27	-3.8298e-05	4.05363e-05	(0, 0)	0.34	0.888387
SA_cuneus	Fat	IVW(MRE)	23	7.56831e-05	9.50705e-05	(0, 0)	0.43	0.888387
SA_fusiform	Fat	IVW(MRE)	19	6.15988e-05	7.31031e-05	(0, 0)	0.4	0.888387
SA_inferiorparietal	Fat	IVW(MRE)	30	5.78041e-06	2.30304e-05	(0, 0)	0.8	0.888387
SA_inferiortemporal	Fat	IVW(MRE)	21	-3.5245e-05	5.53178e-05	(0, 0)	0.52	0.888387
SA_isthmuscingulate	Fat	IVW(MRE)	17	-0.000110487	0.000187852	(0, 0)	0.56	0.888387
SA_lateraloccipital	Fat	IVW(MRE)	20	1.23767e-05	4.84896e-05	(0, 0)	0.8	0.888387
SA_lingual	Fat	IVW(MRE)	36	3.87503e-05	4.74626e-05	(0, 0)	0.41	0.888387
SA_medialorbitofrontal	Fat	IVW(MRE)	9	-8.98626e-05	0.000170253	(0, 0)	0.6	0.888387
SA_paracentral	Fat	IVW(MRE)	24	8.78521e-05	9.89394e-05	(0, 0)	0.37	0.888387
SA_parahippocampal	Fat	IVW(MRE)	13	9.9726e-05	0.000202441	(0, 0)	0.62	0.888387
SA_parsopercularis	Fat	IVW(MRE)	19	2.41369e-05	7.53484e-05	(0, 0)	0.75	0.888387
SA_parsorbitalis	Fat	IVW(MRE)	11	-0.000122142	0.000405147	(0, 0)	0.76	0.888387
SA_parstriangularis	Fat	IVW(MRE)	24	5.58396e-05	6.23529e-05	(0, 0)	0.37	0.888387
SA_pericalcarine	Fat	IVW(MRE)	34	-5.91969e-05	6.72972e-05	(0, 0)	0.38	0.888387
SA_posteriorcingulate	Fat	IVW(MRE)	22	-0.00015831	0.000115579	(0, 0)	0.17	0.888387
SA_precentral	Fat	IVW(MRE)	22	2.17599e-05	2.76015e-05	(0, 0)	0.43	0.888387
SA_precuneus	Fat	IVW(MRE)	32	-1.9331e-05	4.23146e-05	(0, 0)	0.65	0.888387
SA_rostralanteriorcingulate	Fat	IVW(MRE)	15	0.000217075	0.000153212	(0, 0)	0.16	0.888387
SA_superiorfrontal	Fat	IVW(MRE)	22	-2.79628e-05	3.89533e-05	(0, 0)	0.47	0.888387
SA_superiorparietal	Fat	IVW(MRE)	27	-1.18675e-05	2.7585e-05	(0, 0)	0.67	0.888387
SA_transversetemporal	Fat	IVW(MRE)	35	0.000135991	0.000212621	(0, 0)	0.52	0.888387
THICK_bankssts	Fat	IVW(MRE)	11	-0.0728419	0.14457	(-0.36, 0.21)	0.61	0.888387
THICK_caudalmiddlefrontal	Fat	IVW(MRE)	11	0.131131	0.172418	(-0.21, 0.47)	0.45	0.888387
THICK_entorhinal	Fat	IVW(MRE)	9	-0.0603145	0.0521903	(-0.16, 0.04)	0.25	0.888387
THICK_frontalpole	Fat	IVW(MRE)	12	-0.069776	0.068456	(-0.2, 0.06)	0.31	0.888387
THICK_fusiform	Fat	IVW(MRE)	7	-0.120498	0.192753	(-0.5, 0.26)	0.53	0.888387
THICK_inferiorparietal	Fat	IVW(MRE)	13	0.195956	0.256781	(-0.31, 0.7)	0.45	0.888387
THICK_insula	Fat	IVW(MRE)	11	-0.0689472	0.153033	(-0.37, 0.23)	0.65	0.888387
THICK_lateralorbitofrontal	Fat	IVW(MRE)	7	0.139793	0.119633	(-0.09, 0.37)	0.24	0.888387
THICK_lingual	Fat	IVW(MRE)	14	0.103178	0.20585	(-0.3, 0.51)	0.62	0.888387
THICK_medialorbitofrontal	Fat	IVW(MRE)	13	0.045275	0.114031	(-0.18, 0.27)	0.69	0.888387
THICK_paracentral	Fat	IVW(MRE)	14	-0.0927188	0.160678	(-0.41, 0.22)	0.56	0.888387
THICK_parahippocampal	Fat	IVW(MRE)	24	0.0198913	0.0667786	(-0.11, 0.15)	0.77	0.888387
THICK_parsopercularis	Fat	IVW(MRE)	13	-0.0462105	0.173215	(-0.39, 0.29)	0.79	0.888387
THICK_parsorbitalis	Fat	IVW(MRE)	11	0.0349667	0.145001	(-0.25, 0.32)	0.81	0.888387
THICK_parstriangularis	Fat	IVW(MRE)	17	-0.0963089	0.139798	(-0.37, 0.18)	0.49	0.888387
THICK_pericalcarine	Fat	IVW(MRE)	18	0.135992	0.145271	(-0.15, 0.42)	0.35	0.888387
THICK_postcentral	Fat	IVW(MRE)	23	-0.080201	0.139881	(-0.35, 0.19)	0.57	0.888387
THICK_posteriorcingulate	Fat	IVW(MRE)	11	0.107046	0.12714	(-0.14, 0.36)	0.4	0.888387
THICK_precentral	Fat	IVW(MRE)	13	-0.052887	0.213048	(-0.47, 0.36)	0.8	0.888387
THICK_precuneus	Fat	IVW(MRE)	20	-0.136808	0.166947	(-0.46, 0.19)	0.41	0.888387
THICK_rostralanteriorcingulate	Fat	IVW(MRE)	22	-0.0515159	0.0682942	(-0.19, 0.08)	0.45	0.888387
THICK_rostralmiddlefrontal	Fat	IVW(MRE)	11	-0.0891071	0.220277	(-0.52, 0.34)	0.69	0.888387
THICK_superiorfrontal	Fat	IVW(MRE)	20	0.0407353	0.134171	(-0.22, 0.3)	0.76	0.888387
THICK_superiorparietal	Fat	IVW(MRE)	15	0.193045	0.279068	(-0.35, 0.74)	0.49	0.888387
THICK_superiortemporal	Fat	IVW(MRE)	8	0.0693846	0.22331	(-0.37, 0.51)	0.76	0.888387
THICK_supramarginal	Fat	IVW(MRE)	19	0.114974	0.174847	(-0.23, 0.46)	0.51	0.888387
THICK_temporalpole	Fat	IVW(MRE)	6	0.0621773	0.102247	(-0.14, 0.26)	0.54	0.888387
THICK_transversetemporal	Fat	IVW(MRE)	10	0.0736004	0.119999	(-0.16, 0.31)	0.54	0.888387
SA_lateralorbitofrontal	Fat	IVW(MRE)	22	2.02605e-05	9.32063e-05	(0, 0)	0.83	0.895873
SA_supramarginal	Fat	IVW(MRE)	21	7.25346e-06	4.24698e-05	(0, 0)	0.86	0.899692
THICK_isthmuscingulate	Fat	IVW(MRE)	26	-0.0110465	0.0619214	(-0.13, 0.11)	0.86	0.899692
SA_frontalpole	Fat	IVW(MRE)	10	3.69013e-05	0.000598922	(0, 0)	0.95	0.95
SA_superiortemporal	Fat	IVW(MRE)	19	-5.38904e-06	7.29331e-05	(0, 0)	0.94	0.95
THICK_lateraloccipital	Fat	IVW(MRE)	12	-0.0138408	0.185554	(-0.38, 0.35)	0.94	0.95
SA_fusiform	freshfruit_piecesperday	IVW(MRE)	19	-0.000176514	6.5611e-05	(0, 0)	0.0071	0.2414
THICK_isthmuscingulate	freshfruit_piecesperday	IVW(MRE)	28	-0.134259	0.04859	(-0.23, -0.04)	0.0057	0.2414
SA_frontalpole	freshfruit_piecesperday	IVW(MRE)	11	0.00103408	0.000415125	(0, 0)	0.013	0.294667
SA_parsopercularis	freshfruit_piecesperday	IVW(MRE)	20	0.00013025	5.87664e-05	(0, 0)	0.027	0.317333
SA_postcentral	freshfruit_piecesperday	IVW(MRE)	21	0.00010612	4.72168e-05	(0, 0)	0.025	0.317333
SA_precuneus	freshfruit_piecesperday	IVW(MRE)	31	5.90195e-05	2.68666e-05	(0, 0)	0.028	0.317333
SA_posteriorcingulate	freshfruit_piecesperday	IVW(MRE)	24	0.000148522	7.45148e-05	(0, 0)	0.046	0.446857
SA_pericalcarine	freshfruit_piecesperday	IVW(MRE)	39	-9.49239e-05	5.01514e-05	(0, 0)	0.06	0.51
SA_cuneus	freshfruit_piecesperday	IVW(MRE)	23	-0.00013002	7.73731e-05	(0, 0)	0.09	0.612
THICK_inferiorparietal	freshfruit_piecesperday	IVW(MRE)	13	-0.310089	0.184988	(-0.67, 0.05)	0.09	0.612
SA_supramarginal	freshfruit_piecesperday	IVW(MRE)	24	3.42611e-05	2.22657e-05	(0, 0)	0.12	0.631429
THICK_frontalpole	freshfruit_piecesperday	IVW(MRE)	12	0.0650134	0.0424148	(-0.02, 0.15)	0.13	0.631429
THICK_parsopercularis	freshfruit_piecesperday	IVW(MRE)	16	0.219051	0.145093	(-0.07, 0.5)	0.13	0.631429
THICK_superiorfrontal	freshfruit_piecesperday	IVW(MRE)	22	0.203093	0.134694	(-0.06, 0.47)	0.13	0.631429
SA_inferiorparietal	freshfruit_piecesperday	IVW(MRE)	31	2.81959e-05	2.43899e-05	(0, 0)	0.25	0.68
SA_middletemporal	freshfruit_piecesperday	IVW(MRE)	22	8.52639e-05	6.46236e-05	(0, 0)	0.19	0.68
SA_parahippocampal	freshfruit_piecesperday	IVW(MRE)	15	-0.000251549	0.000191371	(0, 0)	0.19	0.68
SA_precentral	freshfruit_piecesperday	IVW(MRE)	25	3.83534e-05	2.83397e-05	(0, 0)	0.18	0.68
THICK_bankssts	freshfruit_piecesperday	IVW(MRE)	12	0.26874	0.212524	(-0.15, 0.69)	0.21	0.68
THICK_caudalmiddlefrontal	freshfruit_piecesperday	IVW(MRE)	12	0.225668	0.194374	(-0.16, 0.61)	0.25	0.68
THICK_cuneus	freshfruit_piecesperday	IVW(MRE)	8	-0.142522	0.124069	(-0.39, 0.1)	0.25	0.68
THICK_lateraloccipital	freshfruit_piecesperday	IVW(MRE)	13	0.238771	0.166148	(-0.09, 0.56)	0.15	0.68
THICK_parsorbitalis	freshfruit_piecesperday	IVW(MRE)	12	0.152341	0.13312	(-0.11, 0.41)	0.25	0.68
THICK_precentral	freshfruit_piecesperday	IVW(MRE)	14	0.200104	0.168991	(-0.13, 0.53)	0.24	0.68
THICK_temporalpole	freshfruit_piecesperday	IVW(MRE)	6	0.10213	0.0721515	(-0.04, 0.24)	0.16	0.68
SA_lateraloccipital	freshfruit_piecesperday	IVW(MRE)	20	-4.16378e-05	4.14012e-05	(0, 0)	0.31	0.805926
SA_medialorbitofrontal	freshfruit_piecesperday	IVW(MRE)	10	0.000254911	0.000258269	(0, 0)	0.32	0.805926
SA_bankssts	freshfruit_piecesperday	IVW(MRE)	19	-0.000132527	0.000149161	(0, 0)	0.37	0.8075
SA_superiorfrontal	freshfruit_piecesperday	IVW(MRE)	23	2.49024e-05	2.85636e-05	(0, 0)	0.38	0.8075
THICK_lingual	freshfruit_piecesperday	IVW(MRE)	14	0.19439	0.208744	(-0.21, 0.6)	0.35	0.8075
THICK_parahippocampal	freshfruit_piecesperday	IVW(MRE)	26	0.0255721	0.0267472	(-0.03, 0.08)	0.34	0.8075
THICK_precuneus	freshfruit_piecesperday	IVW(MRE)	20	0.115888	0.13262	(-0.14, 0.38)	0.38	0.8075
SA_rostralanteriorcingulate	freshfruit_piecesperday	IVW(MRE)	16	-8.27637e-05	0.000104649	(0, 0)	0.43	0.886061
SA_parstriangularis	freshfruit_piecesperday	IVW(MRE)	27	-3.81308e-05	5.25224e-05	(0, 0)	0.47	0.913143
THICK_superiortemporal	freshfruit_piecesperday	IVW(MRE)	11	0.158614	0.217817	(-0.27, 0.59)	0.47	0.913143
SA_caudalmiddlefrontal	freshfruit_piecesperday	IVW(MRE)	28	2.02194e-05	3.29667e-05	(0, 0)	0.54	0.918
SA_inferiortemporal	freshfruit_piecesperday	IVW(MRE)	27	2.7525e-05	4.14062e-05	(0, 0)	0.51	0.918
SA_insula	freshfruit_piecesperday	IVW(MRE)	29	3.88082e-05	6.3602e-05	(0, 0)	0.54	0.918
THICK_inferiortemporal	freshfruit_piecesperday	IVW(MRE)	18	0.079076	0.129712	(-0.18, 0.33)	0.54	0.918
THICK_superiorparietal	freshfruit_piecesperday	IVW(MRE)	14	0.127152	0.187425	(-0.24, 0.49)	0.5	0.918
THICK_parstriangularis	freshfruit_piecesperday	IVW(MRE)	18	0.0548948	0.0933582	(-0.13, 0.24)	0.56	0.928781
SA_caudalanteriorcingulate	freshfruit_piecesperday	IVW(MRE)	15	-3.6692e-05	0.000135111	(0, 0)	0.79	0.95403
SA_entorhinal	freshfruit_piecesperday	IVW(MRE)	15	1.79018e-05	0.000247161	(0, 0)	0.94	0.95403
SA_isthmuscingulate	freshfruit_piecesperday	IVW(MRE)	20	-1.18166e-05	0.000130987	(0, 0)	0.93	0.95403
SA_lateralorbitofrontal	freshfruit_piecesperday	IVW(MRE)	24	8.86409e-06	7.52819e-05	(0, 0)	0.91	0.95403
SA_lingual	freshfruit_piecesperday	IVW(MRE)	39	-8.46992e-06	3.23852e-05	(0, 0)	0.79	0.95403
SA_paracentral	freshfruit_piecesperday	IVW(MRE)	26	2.46128e-05	7.99749e-05	(0, 0)	0.76	0.95403
SA_parsorbitalis	freshfruit_piecesperday	IVW(MRE)	12	-3.57122e-05	0.000306774	(0, 0)	0.91	0.95403
SA_rostralmiddlefrontal	freshfruit_piecesperday	IVW(MRE)	30	1.4396e-05	4.52199e-05	(0, 0)	0.75	0.95403
SA_superiortemporal	freshfruit_piecesperday	IVW(MRE)	22	1.5195e-05	7.38195e-05	(0, 0)	0.84	0.95403
SA_temporalpole	freshfruit_piecesperday	IVW(MRE)	15	-8.54682e-05	0.000231684	(0, 0)	0.71	0.95403
SA_transversetemporal	freshfruit_piecesperday	IVW(MRE)	35	4.17324e-05	0.000264645	(0, 0)	0.87	0.95403
THICK_caudalanteriorcingulate	freshfruit_piecesperday	IVW(MRE)	10	0.0119455	0.0925473	(-0.17, 0.19)	0.9	0.95403
THICK_entorhinal	freshfruit_piecesperday	IVW(MRE)	9	-0.0265799	0.0778223	(-0.18, 0.13)	0.73	0.95403
THICK_fusiform	freshfruit_piecesperday	IVW(MRE)	8	0.106887	0.228397	(-0.34, 0.55)	0.64	0.95403
THICK_insula	freshfruit_piecesperday	IVW(MRE)	14	-0.0207684	0.120933	(-0.26, 0.22)	0.86	0.95403
THICK_lateralorbitofrontal	freshfruit_piecesperday	IVW(MRE)	7	0.0139609	0.194479	(-0.37, 0.4)	0.94	0.95403
THICK_medialorbitofrontal	freshfruit_piecesperday	IVW(MRE)	14	-0.0090267	0.11879	(-0.24, 0.22)	0.94	0.95403
THICK_middletemporal	freshfruit_piecesperday	IVW(MRE)	10	-0.013747	0.171712	(-0.35, 0.32)	0.94	0.95403
THICK_paracentral	freshfruit_piecesperday	IVW(MRE)	14	0.0139323	0.122283	(-0.23, 0.25)	0.91	0.95403
THICK_pericalcarine	freshfruit_piecesperday	IVW(MRE)	18	-0.0566998	0.129937	(-0.31, 0.2)	0.66	0.95403
THICK_postcentral	freshfruit_piecesperday	IVW(MRE)	24	-0.0750719	0.151097	(-0.37, 0.22)	0.62	0.95403
THICK_posteriorcingulate	freshfruit_piecesperday	IVW(MRE)	13	0.0191561	0.151909	(-0.28, 0.32)	0.9	0.95403
THICK_rostralanteriorcingulate	freshfruit_piecesperday	IVW(MRE)	23	0.0368139	0.0801822	(-0.12, 0.19)	0.65	0.95403
THICK_rostralmiddlefrontal	freshfruit_piecesperday	IVW(MRE)	14	0.0468861	0.187293	(-0.32, 0.41)	0.8	0.95403
THICK_supramarginal	freshfruit_piecesperday	IVW(MRE)	20	-0.0208798	0.136928	(-0.29, 0.25)	0.88	0.95403
THICK_transversetemporal	freshfruit_piecesperday	IVW(MRE)	12	-0.00669947	0.0711637	(-0.15, 0.13)	0.92	0.95403
SA_superiorparietal	freshfruit_piecesperday	IVW(MRE)	28	-5.48373e-07	3.14629e-05	(0, 0)	0.99	0.99
SA_lingual	hotdrinktemp	IVW(MRE)	39	7.30023e-05	3.4744e-05	(0, 0)	0.036	0.804
SA_parsopercularis	hotdrinktemp	IVW(MRE)	20	-0.000134576	6.30171e-05	(0, 0)	0.033	0.804
THICK_posteriorcingulate	hotdrinktemp	IVW(MRE)	13	0.349211	0.158015	(0.04, 0.66)	0.027	0.804
SA_bankssts	hotdrinktemp	IVW(MRE)	19	0.000137453	0.000209848	(0, 0)	0.51	1
SA_caudalanteriorcingulate	hotdrinktemp	IVW(MRE)	15	0.000208881	0.000154437	(0, 0)	0.18	1
SA_caudalmiddlefrontal	hotdrinktemp	IVW(MRE)	28	1.06953e-07	4.09189e-05	(0, 0)	1	1
SA_cuneus	hotdrinktemp	IVW(MRE)	23	-0.000128873	8.85442e-05	(0, 0)	0.15	1
SA_entorhinal	hotdrinktemp	IVW(MRE)	15	0.000166697	0.000189161	(0, 0)	0.38	1
SA_frontalpole	hotdrinktemp	IVW(MRE)	11	0.000313946	0.00042025	(0, 0)	0.46	1
SA_fusiform	hotdrinktemp	IVW(MRE)	19	-7.42139e-05	5.04468e-05	(0, 0)	0.14	1
SA_inferiorparietal	hotdrinktemp	IVW(MRE)	31	1.95851e-05	2.47969e-05	(0, 0)	0.43	1
SA_inferiortemporal	hotdrinktemp	IVW(MRE)	27	4.18989e-05	4.23252e-05	(0, 0)	0.32	1
SA_insula	hotdrinktemp	IVW(MRE)	29	-5.02414e-05	6.73439e-05	(0, 0)	0.46	1
SA_lateraloccipital	hotdrinktemp	IVW(MRE)	20	-2.66149e-06	5.54544e-05	(0, 0)	0.96	1
SA_lateralorbitofrontal	hotdrinktemp	IVW(MRE)	24	1.04956e-05	6.27349e-05	(0, 0)	0.87	1
SA_medialorbitofrontal	hotdrinktemp	IVW(MRE)	10	-0.000208421	0.000152552	(0, 0)	0.17	1
SA_middletemporal	hotdrinktemp	IVW(MRE)	22	-7.21627e-05	4.42657e-05	(0, 0)	0.1	1
SA_paracentral	hotdrinktemp	IVW(MRE)	26	4.68371e-05	7.61381e-05	(0, 0)	0.54	1
SA_parahippocampal	hotdrinktemp	IVW(MRE)	15	6.45734e-05	0.000151084	(0, 0)	0.67	1
SA_parsorbitalis	hotdrinktemp	IVW(MRE)	12	-3.94444e-05	0.000150417	(0, 0)	0.79	1
SA_parstriangularis	hotdrinktemp	IVW(MRE)	27	1.15174e-07	3.55277e-05	(0, 0)	1	1
SA_pericalcarine	hotdrinktemp	IVW(MRE)	39	2.73067e-05	5.26924e-05	(0, 0)	0.6	1
SA_postcentral	hotdrinktemp	IVW(MRE)	21	-9.41378e-06	3.18241e-05	(0, 0)	0.77	1
SA_posteriorcingulate	hotdrinktemp	IVW(MRE)	24	4.35161e-05	0.000147147	(0, 0)	0.77	1
SA_precentral	hotdrinktemp	IVW(MRE)	25	1.16579e-05	2.71445e-05	(0, 0)	0.67	1
SA_precuneus	hotdrinktemp	IVW(MRE)	31	1.19203e-05	2.7842e-05	(0, 0)	0.67	1
SA_rostralanteriorcingulate	hotdrinktemp	IVW(MRE)	16	0.000173771	0.000148912	(0, 0)	0.24	1
SA_rostralmiddlefrontal	hotdrinktemp	IVW(MRE)	30	3.43944e-05	2.31023e-05	(0, 0)	0.14	1
SA_superiorfrontal	hotdrinktemp	IVW(MRE)	23	3.13648e-05	2.09023e-05	(0, 0)	0.13	1
SA_superiorparietal	hotdrinktemp	IVW(MRE)	28	3.05643e-07	3.51176e-05	(0, 0)	0.99	1
SA_superiortemporal	hotdrinktemp	IVW(MRE)	22	8.92065e-06	3.13069e-05	(0, 0)	0.78	1
SA_supramarginal	hotdrinktemp	IVW(MRE)	24	-4.52186e-06	2.47758e-05	(0, 0)	0.86	1
SA_temporalpole	hotdrinktemp	IVW(MRE)	15	-6.97076e-05	0.000353322	(0, 0)	0.84	1
SA_transversetemporal	hotdrinktemp	IVW(MRE)	35	-0.000319319	0.000181734	(0, 0)	0.08	1
THICK_bankssts	hotdrinktemp	IVW(MRE)	12	-0.203847	0.169457	(-0.54, 0.13)	0.23	1
THICK_caudalanteriorcingulate	hotdrinktemp	IVW(MRE)	10	-0.0193751	0.0962452	(-0.21, 0.17)	0.84	1
THICK_caudalmiddlefrontal	hotdrinktemp	IVW(MRE)	12	0.177892	0.200345	(-0.21, 0.57)	0.37	1
THICK_cuneus	hotdrinktemp	IVW(MRE)	8	-0.012728	0.147294	(-0.3, 0.28)	0.93	1
THICK_entorhinal	hotdrinktemp	IVW(MRE)	9	-0.0429241	0.0666433	(-0.17, 0.09)	0.52	1
THICK_frontalpole	hotdrinktemp	IVW(MRE)	12	-0.0489726	0.0514512	(-0.15, 0.05)	0.34	1
THICK_fusiform	hotdrinktemp	IVW(MRE)	8	-0.110558	0.211451	(-0.53, 0.3)	0.6	1
THICK_inferiorparietal	hotdrinktemp	IVW(MRE)	13	0.0544578	0.220708	(-0.38, 0.49)	0.81	1
THICK_inferiortemporal	hotdrinktemp	IVW(MRE)	18	0.0307993	0.124055	(-0.21, 0.27)	0.8	1
THICK_insula	hotdrinktemp	IVW(MRE)	14	-0.0431812	0.121743	(-0.28, 0.2)	0.72	1
THICK_isthmuscingulate	hotdrinktemp	IVW(MRE)	28	0.000650788	0.057622	(-0.11, 0.11)	0.99	1
THICK_lateraloccipital	hotdrinktemp	IVW(MRE)	13	0.207923	0.215345	(-0.21, 0.63)	0.33	1
THICK_lateralorbitofrontal	hotdrinktemp	IVW(MRE)	7	-0.095091	0.100286	(-0.29, 0.1)	0.34	1
THICK_lingual	hotdrinktemp	IVW(MRE)	14	0.12674	0.234497	(-0.33, 0.59)	0.59	1
THICK_medialorbitofrontal	hotdrinktemp	IVW(MRE)	14	-0.0353087	0.108265	(-0.25, 0.18)	0.74	1
THICK_middletemporal	hotdrinktemp	IVW(MRE)	10	0.0654026	0.185649	(-0.3, 0.43)	0.72	1
THICK_paracentral	hotdrinktemp	IVW(MRE)	14	-0.109618	0.109693	(-0.32, 0.11)	0.32	1
THICK_parahippocampal	hotdrinktemp	IVW(MRE)	26	-0.00558074	0.0435984	(-0.09, 0.08)	0.9	1
THICK_parsopercularis	hotdrinktemp	IVW(MRE)	16	-0.0590952	0.156556	(-0.37, 0.25)	0.71	1
THICK_parsorbitalis	hotdrinktemp	IVW(MRE)	12	-0.0145367	0.098707	(-0.21, 0.18)	0.88	1
THICK_parstriangularis	hotdrinktemp	IVW(MRE)	18	0.0621565	0.122483	(-0.18, 0.3)	0.61	1
THICK_pericalcarine	hotdrinktemp	IVW(MRE)	18	0.0331066	0.132243	(-0.23, 0.29)	0.8	1
THICK_postcentral	hotdrinktemp	IVW(MRE)	24	0.032899	0.129636	(-0.22, 0.29)	0.8	1
THICK_precentral	hotdrinktemp	IVW(MRE)	14	-0.0532605	0.15687	(-0.36, 0.25)	0.73	1
THICK_precuneus	hotdrinktemp	IVW(MRE)	20	0.0053344	0.175008	(-0.34, 0.35)	0.98	1
THICK_rostralanteriorcingulate	hotdrinktemp	IVW(MRE)	23	-0.0292502	0.0661941	(-0.16, 0.1)	0.66	1
THICK_rostralmiddlefrontal	hotdrinktemp	IVW(MRE)	14	0.0557253	0.129758	(-0.2, 0.31)	0.67	1
THICK_superiorfrontal	hotdrinktemp	IVW(MRE)	22	0.0271115	0.170739	(-0.31, 0.36)	0.87	1
THICK_superiorparietal	hotdrinktemp	IVW(MRE)	14	-0.0164499	0.189841	(-0.39, 0.36)	0.93	1
THICK_superiortemporal	hotdrinktemp	IVW(MRE)	11	0.0762409	0.18812	(-0.29, 0.44)	0.69	1
THICK_supramarginal	hotdrinktemp	IVW(MRE)	20	0.0270025	0.105571	(-0.18, 0.23)	0.8	1
THICK_temporalpole	hotdrinktemp	IVW(MRE)	6	0.0153056	0.0648415	(-0.11, 0.14)	0.81	1
THICK_transversetemporal	hotdrinktemp	IVW(MRE)	12	0.101989	0.0616396	(-0.02, 0.22)	0.1	1
SA_caudalanteriorcingulate	lambmutton_overallfreq	IVW(MRE)	15	0.00042288	9.70377e-05	(0, 0)	1.3e-05	0.000884
SA_bankssts	lambmutton_overallfreq	IVW(MRE)	19	0.000169798	0.000133329	(0, 0)	0.2	0.84
SA_caudalmiddlefrontal	lambmutton_overallfreq	IVW(MRE)	28	-6.3982e-05	3.90503e-05	(0, 0)	0.1	0.84
SA_frontalpole	lambmutton_overallfreq	IVW(MRE)	11	-0.000541098	0.000278619	(0, 0)	0.05	0.84
SA_fusiform	lambmutton_overallfreq	IVW(MRE)	19	-7.22852e-05	6.63066e-05	(0, 0)	0.28	0.84
SA_inferiorparietal	lambmutton_overallfreq	IVW(MRE)	31	-2.82555e-05	2.26857e-05	(0, 0)	0.21	0.84
SA_inferiortemporal	lambmutton_overallfreq	IVW(MRE)	27	-2.93162e-05	3.61412e-05	(0, 0)	0.42	0.84
SA_insula	lambmutton_overallfreq	IVW(MRE)	29	7.69772e-05	5.87723e-05	(0, 0)	0.19	0.84
SA_isthmuscingulate	lambmutton_overallfreq	IVW(MRE)	20	-0.000136339	9.32376e-05	(0, 0)	0.14	0.84
SA_medialorbitofrontal	lambmutton_overallfreq	IVW(MRE)	10	9.99299e-05	9.07566e-05	(0, 0)	0.27	0.84
SA_parahippocampal	lambmutton_overallfreq	IVW(MRE)	15	-0.000218965	0.000141773	(0, 0)	0.12	0.84
SA_parsopercularis	lambmutton_overallfreq	IVW(MRE)	20	7.29482e-05	5.06821e-05	(0, 0)	0.15	0.84
SA_parstriangularis	lambmutton_overallfreq	IVW(MRE)	27	-8.42506e-05	5.0299e-05	(0, 0)	0.09	0.84
SA_pericalcarine	lambmutton_overallfreq	IVW(MRE)	39	-8.45645e-05	3.98307e-05	(0, 0)	0.034	0.84
SA_precuneus	lambmutton_overallfreq	IVW(MRE)	31	3.12564e-05	3.51169e-05	(0, 0)	0.37	0.84
SA_rostralanteriorcingulate	lambmutton_overallfreq	IVW(MRE)	16	0.000197638	0.000107443	(0, 0)	0.07	0.84
SA_superiorfrontal	lambmutton_overallfreq	IVW(MRE)	23	-3.7365e-05	2.353e-05	(0, 0)	0.11	0.84
SA_superiorparietal	lambmutton_overallfreq	IVW(MRE)	28	3.55357e-05	2.84347e-05	(0, 0)	0.21	0.84
SA_supramarginal	lambmutton_overallfreq	IVW(MRE)	24	2.48141e-05	3.04436e-05	(0, 0)	0.42	0.84
SA_temporalpole	lambmutton_overallfreq	IVW(MRE)	15	0.000400496	0.000334703	(0, 0)	0.23	0.84
SA_transversetemporal	lambmutton_overallfreq	IVW(MRE)	35	0.000144426	0.000163932	(0, 0)	0.38	0.84
THICK_cuneus	lambmutton_overallfreq	IVW(MRE)	8	0.197133	0.17469	(-0.15, 0.54)	0.26	0.84
THICK_entorhinal	lambmutton_overallfreq	IVW(MRE)	9	-0.0553922	0.0615092	(-0.18, 0.07)	0.37	0.84
THICK_inferiorparietal	lambmutton_overallfreq	IVW(MRE)	13	0.134257	0.119894	(-0.1, 0.37)	0.26	0.84
THICK_lateralorbitofrontal	lambmutton_overallfreq	IVW(MRE)	7	-0.11615	0.135201	(-0.38, 0.15)	0.39	0.84
THICK_medialorbitofrontal	lambmutton_overallfreq	IVW(MRE)	14	-0.0789944	0.089672	(-0.25, 0.1)	0.38	0.84
THICK_paracentral	lambmutton_overallfreq	IVW(MRE)	14	0.14597	0.137856	(-0.12, 0.42)	0.29	0.84
THICK_parsorbitalis	lambmutton_overallfreq	IVW(MRE)	12	0.0993285	0.0879212	(-0.07, 0.27)	0.26	0.84
THICK_pericalcarine	lambmutton_overallfreq	IVW(MRE)	18	-0.0971642	0.12148	(-0.34, 0.14)	0.42	0.84
THICK_postcentral	lambmutton_overallfreq	IVW(MRE)	24	-0.222733	0.118883	(-0.46, 0.01)	0.06	0.84
THICK_posteriorcingulate	lambmutton_overallfreq	IVW(MRE)	13	0.0786454	0.0901217	(-0.1, 0.26)	0.38	0.84
THICK_rostralanteriorcingulate	lambmutton_overallfreq	IVW(MRE)	23	-0.0634254	0.0731842	(-0.21, 0.08)	0.39	0.84
THICK_superiorparietal	lambmutton_overallfreq	IVW(MRE)	14	0.198851	0.22413	(-0.24, 0.64)	0.37	0.84
THICK_superiortemporal	lambmutton_overallfreq	IVW(MRE)	11	-0.229756	0.17253	(-0.57, 0.11)	0.18	0.84
SA_cuneus	lambmutton_overallfreq	IVW(MRE)	23	4.24128e-05	0.000111164	(0, 0)	0.7	0.943881
SA_entorhinal	lambmutton_overallfreq	IVW(MRE)	15	2.09492e-05	0.000141396	(0, 0)	0.88	0.943881
SA_lateraloccipital	lambmutton_overallfreq	IVW(MRE)	20	-1.59457e-05	3.9044e-05	(0, 0)	0.68	0.943881
SA_lateralorbitofrontal	lambmutton_overallfreq	IVW(MRE)	24	-9.20994e-06	5.73126e-05	(0, 0)	0.87	0.943881
SA_lingual	lambmutton_overallfreq	IVW(MRE)	39	3.62934e-06	2.95418e-05	(0, 0)	0.9	0.943881
SA_middletemporal	lambmutton_overallfreq	IVW(MRE)	22	2.41783e-05	4.41842e-05	(0, 0)	0.58	0.943881
SA_paracentral	lambmutton_overallfreq	IVW(MRE)	26	8.94135e-06	7.68815e-05	(0, 0)	0.91	0.943881
SA_parsorbitalis	lambmutton_overallfreq	IVW(MRE)	12	0.000114233	0.000242169	(0, 0)	0.64	0.943881
SA_postcentral	lambmutton_overallfreq	IVW(MRE)	21	1.11219e-05	5.22612e-05	(0, 0)	0.83	0.943881
SA_posteriorcingulate	lambmutton_overallfreq	IVW(MRE)	24	-3.36083e-05	0.000112868	(0, 0)	0.77	0.943881
SA_precentral	lambmutton_overallfreq	IVW(MRE)	25	4.12099e-06	2.43674e-05	(0, 0)	0.87	0.943881
SA_rostralmiddlefrontal	lambmutton_overallfreq	IVW(MRE)	30	1.47494e-05	2.58261e-05	(0, 0)	0.57	0.943881
THICK_bankssts	lambmutton_overallfreq	IVW(MRE)	12	-0.0922759	0.176399	(-0.44, 0.25)	0.6	0.943881
THICK_caudalanteriorcingulate	lambmutton_overallfreq	IVW(MRE)	10	-0.0261829	0.0539653	(-0.13, 0.08)	0.63	0.943881
THICK_caudalmiddlefrontal	lambmutton_overallfreq	IVW(MRE)	12	-0.0255275	0.143607	(-0.31, 0.26)	0.86	0.943881
THICK_frontalpole	lambmutton_overallfreq	IVW(MRE)	12	-0.0352062	0.086303	(-0.2, 0.13)	0.68	0.943881
THICK_fusiform	lambmutton_overallfreq	IVW(MRE)	8	0.0218381	0.216346	(-0.4, 0.45)	0.92	0.943881
THICK_inferiortemporal	lambmutton_overallfreq	IVW(MRE)	18	0.0671301	0.150853	(-0.23, 0.36)	0.66	0.943881
THICK_insula	lambmutton_overallfreq	IVW(MRE)	14	-0.0719225	0.159545	(-0.38, 0.24)	0.65	0.943881
THICK_isthmuscingulate	lambmutton_overallfreq	IVW(MRE)	28	0.0187339	0.0433106	(-0.07, 0.1)	0.67	0.943881
THICK_lateraloccipital	lambmutton_overallfreq	IVW(MRE)	13	-0.0153231	0.150266	(-0.31, 0.28)	0.92	0.943881
THICK_lingual	lambmutton_overallfreq	IVW(MRE)	14	0.0328001	0.143816	(-0.25, 0.31)	0.82	0.943881
THICK_middletemporal	lambmutton_overallfreq	IVW(MRE)	10	-0.0163484	0.186664	(-0.38, 0.35)	0.93	0.943881
THICK_parahippocampal	lambmutton_overallfreq	IVW(MRE)	26	-0.0155169	0.0459678	(-0.11, 0.07)	0.74	0.943881
THICK_parsopercularis	lambmutton_overallfreq	IVW(MRE)	16	-0.029715	0.135481	(-0.3, 0.24)	0.83	0.943881
THICK_parstriangularis	lambmutton_overallfreq	IVW(MRE)	18	-0.0117694	0.120703	(-0.25, 0.22)	0.92	0.943881
THICK_precentral	lambmutton_overallfreq	IVW(MRE)	14	-0.105098	0.1699	(-0.44, 0.23)	0.54	0.943881
THICK_precuneus	lambmutton_overallfreq	IVW(MRE)	20	0.0222544	0.116382	(-0.21, 0.25)	0.85	0.943881
THICK_rostralmiddlefrontal	lambmutton_overallfreq	IVW(MRE)	14	-0.0305866	0.138343	(-0.3, 0.24)	0.83	0.943881
THICK_superiorfrontal	lambmutton_overallfreq	IVW(MRE)	22	-0.105885	0.169209	(-0.44, 0.23)	0.53	0.943881
THICK_supramarginal	lambmutton_overallfreq	IVW(MRE)	20	-0.0381628	0.232118	(-0.49, 0.42)	0.87	0.943881
THICK_temporalpole	lambmutton_overallfreq	IVW(MRE)	6	0.0339482	0.0551939	(-0.07, 0.14)	0.54	0.943881
THICK_transversetemporal	lambmutton_overallfreq	IVW(MRE)	12	0.00728116	0.0817276	(-0.15, 0.17)	0.93	0.943881
SA_superiortemporal	lambmutton_overallfreq	IVW(MRE)	22	2.43288e-06	4.19276e-05	(0, 0)	0.95	0.95
SA_isthmuscingulate	milk_typeused_bin5	IVW(MRE)	20	-0.000128453	6.69678e-05	(0, 0)	0.06	0.51
SA_parsopercularis	milk_typeused_bin5	IVW(MRE)	20	-6.99424e-05	3.25767e-05	(0, 0)	0.032	0.51
SA_rostralmiddlefrontal	milk_typeused_bin5	IVW(MRE)	30	-1.96676e-05	1.03828e-05	(0, 0)	0.06	0.51
THICK_caudalanteriorcingulate	milk_typeused_bin5	IVW(MRE)	10	0.0453081	0.0206993	(0, 0.09)	0.029	0.51
THICK_cuneus	milk_typeused_bin5	IVW(MRE)	8	0.249341	0.107173	(0.04, 0.46)	0.02	0.51
THICK_fusiform	milk_typeused_bin5	IVW(MRE)	8	-0.140326	0.0746068	(-0.29, 0.01)	0.06	0.51
THICK_parstriangularis	milk_typeused_bin5	IVW(MRE)	18	0.117899	0.0631816	(-0.01, 0.24)	0.06	0.51
THICK_transversetemporal	milk_typeused_bin5	IVW(MRE)	12	-0.129079	0.0518147	(-0.23, -0.03)	0.013	0.51
SA_parahippocampal	milk_typeused_bin5	IVW(MRE)	15	-0.000165397	9.22859e-05	(0, 0)	0.07	0.528889
SA_paracentral	milk_typeused_bin5	IVW(MRE)	26	5.33979e-05	3.07556e-05	(0, 0)	0.08	0.544
SA_postcentral	milk_typeused_bin5	IVW(MRE)	21	-3.03152e-05	1.80488e-05	(0, 0)	0.09	0.556364
SA_inferiorparietal	milk_typeused_bin5	IVW(MRE)	31	-1.90695e-05	1.15657e-05	(0, 0)	0.1	0.566667
SA_precentral	milk_typeused_bin5	IVW(MRE)	25	2.70733e-05	1.71898e-05	(0, 0)	0.12	0.627692
THICK_lateraloccipital	milk_typeused_bin5	IVW(MRE)	13	0.127341	0.0837127	(-0.04, 0.29)	0.13	0.631429
THICK_rostralanteriorcingulate	milk_typeused_bin5	IVW(MRE)	23	0.0483213	0.0325235	(-0.02, 0.11)	0.14	0.634667
SA_middletemporal	milk_typeused_bin5	IVW(MRE)	22	-3.2027e-05	2.42592e-05	(0, 0)	0.19	0.755556
THICK_entorhinal	milk_typeused_bin5	IVW(MRE)	9	0.0425842	0.0335529	(-0.02, 0.11)	0.2	0.755556
THICK_paracentral	milk_typeused_bin5	IVW(MRE)	14	0.0825293	0.0611068	(-0.04, 0.2)	0.18	0.755556
SA_medialorbitofrontal	milk_typeused_bin5	IVW(MRE)	10	-0.000154504	0.000128202	(0, 0)	0.23	0.823158
THICK_superiorparietal	milk_typeused_bin5	IVW(MRE)	14	-0.0953324	0.0854004	(-0.26, 0.07)	0.26	0.884
SA_lateralorbitofrontal	milk_typeused_bin5	IVW(MRE)	24	-3.14613e-05	3.22884e-05	(0, 0)	0.33	0.967692
SA_pericalcarine	milk_typeused_bin5	IVW(MRE)	39	-2.23727e-05	2.35814e-05	(0, 0)	0.34	0.967692
SA_posteriorcingulate	milk_typeused_bin5	IVW(MRE)	24	-7.58091e-05	8.11943e-05	(0, 0)	0.35	0.967692
THICK_isthmuscingulate	milk_typeused_bin5	IVW(MRE)	28	0.035737	0.0402715	(-0.04, 0.11)	0.37	0.967692
THICK_lingual	milk_typeused_bin5	IVW(MRE)	14	-0.0804008	0.0906207	(-0.26, 0.1)	0.37	0.967692
THICK_medialorbitofrontal	milk_typeused_bin5	IVW(MRE)	14	-0.0463442	0.0463455	(-0.14, 0.04)	0.32	0.967692
SA_fusiform	milk_typeused_bin5	IVW(MRE)	19	-2.69395e-05	3.1823e-05	(0, 0)	0.4	0.971429
THICK_insula	milk_typeused_bin5	IVW(MRE)	14	-0.0900836	0.10482	(-0.3, 0.12)	0.39	0.971429
SA_bankssts	milk_typeused_bin5	IVW(MRE)	19	1.28444e-05	6.81282e-05	(0, 0)	0.85	0.99
SA_caudalanteriorcingulate	milk_typeused_bin5	IVW(MRE)	15	2.78439e-05	7.82198e-05	(0, 0)	0.72	0.99
SA_caudalmiddlefrontal	milk_typeused_bin5	IVW(MRE)	28	5.76076e-06	2.04948e-05	(0, 0)	0.78	0.99
SA_cuneus	milk_typeused_bin5	IVW(MRE)	23	4.69487e-06	4.22608e-05	(0, 0)	0.91	0.99
SA_entorhinal	milk_typeused_bin5	IVW(MRE)	15	-9.67946e-07	0.000120173	(0, 0)	0.99	0.99
SA_frontalpole	milk_typeused_bin5	IVW(MRE)	11	2.05869e-06	0.000207454	(0, 0)	0.99	0.99
SA_inferiortemporal	milk_typeused_bin5	IVW(MRE)	27	9.40258e-07	2.35161e-05	(0, 0)	0.97	0.99
SA_insula	milk_typeused_bin5	IVW(MRE)	29	4.93399e-06	3.9253e-05	(0, 0)	0.9	0.99
SA_lateraloccipital	milk_typeused_bin5	IVW(MRE)	20	1.11414e-05	2.15436e-05	(0, 0)	0.61	0.99
SA_lingual	milk_typeused_bin5	IVW(MRE)	39	5.00207e-06	1.7171e-05	(0, 0)	0.77	0.99
SA_parsorbitalis	milk_typeused_bin5	IVW(MRE)	12	-2.24937e-05	0.000145076	(0, 0)	0.88	0.99
SA_parstriangularis	milk_typeused_bin5	IVW(MRE)	27	7.00722e-06	2.68373e-05	(0, 0)	0.79	0.99
SA_precuneus	milk_typeused_bin5	IVW(MRE)	31	-1.18684e-05	1.78068e-05	(0, 0)	0.51	0.99
SA_rostralanteriorcingulate	milk_typeused_bin5	IVW(MRE)	16	5.34158e-06	8.38979e-05	(0, 0)	0.95	0.99
SA_superiorfrontal	milk_typeused_bin5	IVW(MRE)	23	-8.50171e-06	1.33048e-05	(0, 0)	0.52	0.99
SA_superiorparietal	milk_typeused_bin5	IVW(MRE)	28	-6.93199e-06	1.3188e-05	(0, 0)	0.6	0.99
SA_superiortemporal	milk_typeused_bin5	IVW(MRE)	22	-1.73416e-05	2.95528e-05	(0, 0)	0.56	0.99
SA_supramarginal	milk_typeused_bin5	IVW(MRE)	24	2.76658e-06	1.48577e-05	(0, 0)	0.85	0.99
SA_temporalpole	milk_typeused_bin5	IVW(MRE)	15	3.83339e-05	0.000140315	(0, 0)	0.78	0.99
SA_transversetemporal	milk_typeused_bin5	IVW(MRE)	35	1.45252e-05	0.000132937	(0, 0)	0.91	0.99
THICK_bankssts	milk_typeused_bin5	IVW(MRE)	12	0.0285471	0.0814084	(-0.13, 0.19)	0.73	0.99
THICK_caudalmiddlefrontal	milk_typeused_bin5	IVW(MRE)	12	-0.00995201	0.125946	(-0.26, 0.24)	0.94	0.99
THICK_frontalpole	milk_typeused_bin5	IVW(MRE)	12	-0.0100514	0.0327218	(-0.07, 0.05)	0.76	0.99
THICK_inferiorparietal	milk_typeused_bin5	IVW(MRE)	13	0.0285882	0.099954	(-0.17, 0.22)	0.77	0.99
THICK_inferiortemporal	milk_typeused_bin5	IVW(MRE)	18	-0.0136018	0.06407	(-0.14, 0.11)	0.83	0.99
THICK_lateralorbitofrontal	milk_typeused_bin5	IVW(MRE)	7	0.00835399	0.100716	(-0.19, 0.21)	0.93	0.99
THICK_middletemporal	milk_typeused_bin5	IVW(MRE)	10	0.0413772	0.0798979	(-0.12, 0.2)	0.6	0.99
THICK_parahippocampal	milk_typeused_bin5	IVW(MRE)	26	-0.00436043	0.0171671	(-0.04, 0.03)	0.8	0.99
THICK_parsopercularis	milk_typeused_bin5	IVW(MRE)	16	-0.0345258	0.0716104	(-0.17, 0.11)	0.63	0.99
THICK_parsorbitalis	milk_typeused_bin5	IVW(MRE)	12	-0.00625356	0.0624039	(-0.13, 0.12)	0.92	0.99
THICK_pericalcarine	milk_typeused_bin5	IVW(MRE)	18	0.0500392	0.0645669	(-0.08, 0.18)	0.44	0.99
THICK_postcentral	milk_typeused_bin5	IVW(MRE)	24	-0.00224829	0.0552525	(-0.11, 0.11)	0.97	0.99
THICK_posteriorcingulate	milk_typeused_bin5	IVW(MRE)	13	0.0335537	0.0642842	(-0.09, 0.16)	0.6	0.99
THICK_precentral	milk_typeused_bin5	IVW(MRE)	14	0.0192798	0.067907	(-0.11, 0.15)	0.78	0.99
THICK_precuneus	milk_typeused_bin5	IVW(MRE)	20	-0.0553464	0.0800779	(-0.21, 0.1)	0.49	0.99
THICK_rostralmiddlefrontal	milk_typeused_bin5	IVW(MRE)	14	-0.055402	0.113211	(-0.28, 0.17)	0.62	0.99
THICK_superiorfrontal	milk_typeused_bin5	IVW(MRE)	22	-0.0251593	0.0774034	(-0.18, 0.13)	0.75	0.99
THICK_superiortemporal	milk_typeused_bin5	IVW(MRE)	11	-0.0637617	0.10684	(-0.27, 0.15)	0.55	0.99
THICK_supramarginal	milk_typeused_bin5	IVW(MRE)	20	-0.0491421	0.0946954	(-0.23, 0.14)	0.6	0.99
THICK_temporalpole	milk_typeused_bin5	IVW(MRE)	6	0.0305144	0.0480683	(-0.06, 0.12)	0.53	0.99
SA_bankssts	milk_typeused_bin9	IVW(MRE)	19	-0.000190018	0.000108014	(0, 0)	0.08	0.85
SA_temporalpole	milk_typeused_bin9	IVW(MRE)	15	-0.000456539	0.000236918	(0, 0)	0.05	0.85
THICK_caudalanteriorcingulate	milk_typeused_bin9	IVW(MRE)	10	-0.0730702	0.0362202	(-0.14, 0)	0.044	0.85
THICK_insula	milk_typeused_bin9	IVW(MRE)	14	0.22605	0.136048	(-0.04, 0.49)	0.1	0.85
THICK_paracentral	milk_typeused_bin9	IVW(MRE)	14	-0.144287	0.0841177	(-0.31, 0.02)	0.09	0.85
THICK_posteriorcingulate	milk_typeused_bin9	IVW(MRE)	13	-0.154265	0.0882526	(-0.33, 0.02)	0.08	0.85
THICK_rostralmiddlefrontal	milk_typeused_bin9	IVW(MRE)	14	0.234624	0.132046	(-0.02, 0.49)	0.08	0.85
THICK_superiorparietal	milk_typeused_bin9	IVW(MRE)	14	0.221218	0.129357	(-0.03, 0.47)	0.09	0.85
SA_isthmuscingulate	milk_typeused_bin9	IVW(MRE)	20	0.000167443	0.000109951	(0, 0)	0.13	0.884
SA_precuneus	milk_typeused_bin9	IVW(MRE)	31	3.95933e-05	2.58934e-05	(0, 0)	0.13	0.884
SA_inferiorparietal	milk_typeused_bin9	IVW(MRE)	31	2.0412e-05	1.69397e-05	(0, 0)	0.23	0.966316
SA_superiorparietal	milk_typeused_bin9	IVW(MRE)	28	-2.18242e-05	1.99111e-05	(0, 0)	0.27	0.966316
THICK_cuneus	milk_typeused_bin9	IVW(MRE)	8	-0.197388	0.178234	(-0.55, 0.15)	0.27	0.966316
THICK_fusiform	milk_typeused_bin9	IVW(MRE)	8	-0.16713	0.144956	(-0.45, 0.12)	0.25	0.966316
THICK_lingual	milk_typeused_bin9	IVW(MRE)	14	0.219507	0.167315	(-0.11, 0.55)	0.19	0.966316
THICK_parahippocampal	milk_typeused_bin9	IVW(MRE)	26	0.0321007	0.0288931	(-0.02, 0.09)	0.27	0.966316
THICK_parsopercularis	milk_typeused_bin9	IVW(MRE)	16	0.137558	0.115783	(-0.09, 0.36)	0.23	0.966316
THICK_superiortemporal	milk_typeused_bin9	IVW(MRE)	11	0.171804	0.122931	(-0.07, 0.41)	0.16	0.966316
THICK_supramarginal	milk_typeused_bin9	IVW(MRE)	20	0.170211	0.132192	(-0.09, 0.43)	0.2	0.966316
SA_caudalanteriorcingulate	milk_typeused_bin9	IVW(MRE)	15	4.1004e-05	0.000159697	(0, 0)	0.8	0.973103
SA_caudalmiddlefrontal	milk_typeused_bin9	IVW(MRE)	28	7.70558e-06	3.26282e-05	(0, 0)	0.81	0.973103
SA_cuneus	milk_typeused_bin9	IVW(MRE)	23	-6.14459e-05	7.05837e-05	(0, 0)	0.38	0.973103
SA_frontalpole	milk_typeused_bin9	IVW(MRE)	11	0.000260661	0.00039558	(0, 0)	0.51	0.973103
SA_fusiform	milk_typeused_bin9	IVW(MRE)	19	-3.61278e-05	4.0896e-05	(0, 0)	0.38	0.973103
SA_inferiortemporal	milk_typeused_bin9	IVW(MRE)	27	3.37063e-05	3.56269e-05	(0, 0)	0.34	0.973103
SA_insula	milk_typeused_bin9	IVW(MRE)	29	-1.58554e-05	7.03392e-05	(0, 0)	0.82	0.973103
SA_lateraloccipital	milk_typeused_bin9	IVW(MRE)	20	-1.2692e-05	2.55283e-05	(0, 0)	0.62	0.973103
SA_lateralorbitofrontal	milk_typeused_bin9	IVW(MRE)	24	-1.22031e-05	4.58152e-05	(0, 0)	0.79	0.973103
SA_lingual	milk_typeused_bin9	IVW(MRE)	39	1.22498e-05	2.73516e-05	(0, 0)	0.65	0.973103
SA_medialorbitofrontal	milk_typeused_bin9	IVW(MRE)	10	6.49657e-05	0.00020559	(0, 0)	0.75	0.973103
SA_parahippocampal	milk_typeused_bin9	IVW(MRE)	15	-3.82493e-05	0.000137755	(0, 0)	0.78	0.973103
SA_parsopercularis	milk_typeused_bin9	IVW(MRE)	20	1.60817e-05	4.77757e-05	(0, 0)	0.74	0.973103
SA_parsorbitalis	milk_typeused_bin9	IVW(MRE)	12	-6.5613e-05	0.000251836	(0, 0)	0.79	0.973103
SA_parstriangularis	milk_typeused_bin9	IVW(MRE)	27	-1.99717e-05	4.32239e-05	(0, 0)	0.64	0.973103
SA_postcentral	milk_typeused_bin9	IVW(MRE)	21	9.40168e-06	3.43551e-05	(0, 0)	0.78	0.973103
SA_posteriorcingulate	milk_typeused_bin9	IVW(MRE)	24	-2.65559e-05	0.000109379	(0, 0)	0.81	0.973103
SA_precentral	milk_typeused_bin9	IVW(MRE)	25	1.38686e-05	1.92809e-05	(0, 0)	0.47	0.973103
SA_rostralanteriorcingulate	milk_typeused_bin9	IVW(MRE)	16	0.000102269	0.000119567	(0, 0)	0.39	0.973103
SA_superiortemporal	milk_typeused_bin9	IVW(MRE)	22	-3.53862e-05	4.47729e-05	(0, 0)	0.43	0.973103
SA_supramarginal	milk_typeused_bin9	IVW(MRE)	24	5.1953e-06	2.06288e-05	(0, 0)	0.8	0.973103
THICK_bankssts	milk_typeused_bin9	IVW(MRE)	12	-0.109406	0.11122	(-0.33, 0.11)	0.33	0.973103
THICK_caudalmiddlefrontal	milk_typeused_bin9	IVW(MRE)	12	0.0968794	0.139898	(-0.18, 0.37)	0.49	0.973103
THICK_frontalpole	milk_typeused_bin9	IVW(MRE)	12	-0.0554392	0.0661395	(-0.19, 0.07)	0.4	0.973103
THICK_inferiorparietal	milk_typeused_bin9	IVW(MRE)	13	-0.100457	0.199269	(-0.49, 0.29)	0.61	0.973103
THICK_inferiortemporal	milk_typeused_bin9	IVW(MRE)	18	0.041145	0.106796	(-0.17, 0.25)	0.7	0.973103
THICK_isthmuscingulate	milk_typeused_bin9	IVW(MRE)	28	0.0316786	0.0621042	(-0.09, 0.15)	0.61	0.973103
THICK_lateraloccipital	milk_typeused_bin9	IVW(MRE)	13	0.088871	0.165466	(-0.24, 0.41)	0.59	0.973103
THICK_medialorbitofrontal	milk_typeused_bin9	IVW(MRE)	14	0.047162	0.0702314	(-0.09, 0.18)	0.5	0.973103
THICK_middletemporal	milk_typeused_bin9	IVW(MRE)	10	-0.143149	0.174686	(-0.49, 0.2)	0.41	0.973103
THICK_parsorbitalis	milk_typeused_bin9	IVW(MRE)	12	-0.116234	0.110866	(-0.33, 0.1)	0.29	0.973103
THICK_parstriangularis	milk_typeused_bin9	IVW(MRE)	18	-0.104162	0.115138	(-0.33, 0.12)	0.37	0.973103
THICK_pericalcarine	milk_typeused_bin9	IVW(MRE)	18	0.0881428	0.122446	(-0.15, 0.33)	0.47	0.973103
THICK_postcentral	milk_typeused_bin9	IVW(MRE)	24	0.089656	0.121419	(-0.15, 0.33)	0.46	0.973103
THICK_precentral	milk_typeused_bin9	IVW(MRE)	14	-0.041507	0.122902	(-0.28, 0.2)	0.74	0.973103
THICK_rostralanteriorcingulate	milk_typeused_bin9	IVW(MRE)	23	0.0126273	0.0583304	(-0.1, 0.13)	0.83	0.973103
THICK_superiorfrontal	milk_typeused_bin9	IVW(MRE)	22	0.0885406	0.143102	(-0.19, 0.37)	0.54	0.973103
THICK_temporalpole	milk_typeused_bin9	IVW(MRE)	6	-0.026734	0.0801073	(-0.18, 0.13)	0.74	0.973103
THICK_transversetemporal	milk_typeused_bin9	IVW(MRE)	12	-0.0256806	0.0759135	(-0.17, 0.12)	0.74	0.973103
SA_middletemporal	milk_typeused_bin9	IVW(MRE)	22	1.73988e-06	2.94493e-05	(0, 0)	0.95	0.978788
SA_paracentral	milk_typeused_bin9	IVW(MRE)	26	2.49371e-06	4.28113e-05	(0, 0)	0.95	0.978788
SA_pericalcarine	milk_typeused_bin9	IVW(MRE)	39	2.98225e-06	4.38013e-05	(0, 0)	0.95	0.978788
SA_rostralmiddlefrontal	milk_typeused_bin9	IVW(MRE)	30	-4.4545e-06	2.35058e-05	(0, 0)	0.85	0.978788
SA_superiorfrontal	milk_typeused_bin9	IVW(MRE)	23	3.43199e-06	2.70267e-05	(0, 0)	0.9	0.978788
THICK_entorhinal	milk_typeused_bin9	IVW(MRE)	9	-0.00580545	0.0437709	(-0.09, 0.08)	0.89	0.978788
THICK_lateralorbitofrontal	milk_typeused_bin9	IVW(MRE)	7	0.0119785	0.108022	(-0.2, 0.22)	0.91	0.978788
THICK_precuneus	milk_typeused_bin9	IVW(MRE)	20	-0.0132489	0.130188	(-0.27, 0.24)	0.92	0.978788
SA_transversetemporal	milk_typeused_bin9	IVW(MRE)	35	-4.98059e-06	0.000151026	(0, 0)	0.97	0.984478
SA_entorhinal	milk_typeused_bin9	IVW(MRE)	15	-1.30367e-07	0.000166576	(0, 0)	1	1
SA_medialorbitofrontal	nonoilyfish_overallfreq	IVW(MRE)	10	-0.000270477	5.25527e-05	(0, 0)	2.7e-07	1.836e-05
SA_inferiortemporal	nonoilyfish_overallfreq	IVW(MRE)	27	9.52688e-05	3.66513e-05	(0, 0)	0.0093	0.12648
THICK_inferiortemporal	nonoilyfish_overallfreq	IVW(MRE)	18	0.23947	0.0913002	(0.06, 0.42)	0.0087	0.12648
THICK_rostralanteriorcingulate	nonoilyfish_overallfreq	IVW(MRE)	23	-0.195725	0.0708708	(-0.33, -0.06)	0.0057	0.12648
THICK_superiorparietal	nonoilyfish_overallfreq	IVW(MRE)	14	0.402708	0.150432	(0.11, 0.7)	0.0074	0.12648
THICK_cuneus	nonoilyfish_overallfreq	IVW(MRE)	8	0.209618	0.0921761	(0.03, 0.39)	0.023	0.260667
THICK_posteriorcingulate	nonoilyfish_overallfreq	IVW(MRE)	13	-0.224248	0.101398	(-0.42, -0.03)	0.027	0.262286
THICK_parstriangularis	nonoilyfish_overallfreq	IVW(MRE)	18	-0.207091	0.109596	(-0.42, 0.01)	0.06	0.51
SA_entorhinal	nonoilyfish_overallfreq	IVW(MRE)	15	-0.000311879	0.000180056	(0, 0)	0.08	0.604444
SA_caudalanteriorcingulate	nonoilyfish_overallfreq	IVW(MRE)	15	0.000156953	0.00013722	(0, 0)	0.25	0.68
SA_frontalpole	nonoilyfish_overallfreq	IVW(MRE)	11	0.000322276	0.000265911	(0, 0)	0.23	0.68
SA_fusiform	nonoilyfish_overallfreq	IVW(MRE)	19	-4.49522e-05	4.28956e-05	(0, 0)	0.29	0.68
SA_lateralorbitofrontal	nonoilyfish_overallfreq	IVW(MRE)	24	-5.77994e-05	5.37682e-05	(0, 0)	0.28	0.68
SA_lingual	nonoilyfish_overallfreq	IVW(MRE)	39	3.32976e-05	3.0007e-05	(0, 0)	0.27	0.68
SA_middletemporal	nonoilyfish_overallfreq	IVW(MRE)	22	-5.51878e-05	5.19524e-05	(0, 0)	0.29	0.68
SA_postcentral	nonoilyfish_overallfreq	IVW(MRE)	21	3.48391e-05	3.15204e-05	(0, 0)	0.27	0.68
SA_posteriorcingulate	nonoilyfish_overallfreq	IVW(MRE)	24	0.000149404	0.000110712	(0, 0)	0.18	0.68
SA_rostralanteriorcingulate	nonoilyfish_overallfreq	IVW(MRE)	16	-0.000161933	0.000104435	(0, 0)	0.12	0.68
SA_superiorfrontal	nonoilyfish_overallfreq	IVW(MRE)	23	-4.18871e-05	3.31491e-05	(0, 0)	0.21	0.68
SA_superiortemporal	nonoilyfish_overallfreq	IVW(MRE)	22	-5.27419e-05	4.43296e-05	(0, 0)	0.23	0.68
SA_temporalpole	nonoilyfish_overallfreq	IVW(MRE)	15	-0.000353562	0.000351166	(0, 0)	0.31	0.68
SA_transversetemporal	nonoilyfish_overallfreq	IVW(MRE)	35	-0.000292357	0.000189733	(0, 0)	0.12	0.68
THICK_entorhinal	nonoilyfish_overallfreq	IVW(MRE)	9	-0.10844	0.0806871	(-0.27, 0.05)	0.18	0.68
THICK_frontalpole	nonoilyfish_overallfreq	IVW(MRE)	12	-0.0627622	0.0579835	(-0.18, 0.05)	0.28	0.68
THICK_fusiform	nonoilyfish_overallfreq	IVW(MRE)	8	0.170735	0.132114	(-0.09, 0.43)	0.2	0.68
THICK_insula	nonoilyfish_overallfreq	IVW(MRE)	14	-0.155771	0.160952	(-0.47, 0.16)	0.33	0.68
THICK_isthmuscingulate	nonoilyfish_overallfreq	IVW(MRE)	28	-0.0944905	0.0623098	(-0.22, 0.03)	0.13	0.68
THICK_lateraloccipital	nonoilyfish_overallfreq	IVW(MRE)	13	0.186913	0.184568	(-0.17, 0.55)	0.31	0.68
THICK_medialorbitofrontal	nonoilyfish_overallfreq	IVW(MRE)	14	-0.111977	0.0990766	(-0.31, 0.08)	0.26	0.68
THICK_parsopercularis	nonoilyfish_overallfreq	IVW(MRE)	16	-0.120418	0.103423	(-0.32, 0.08)	0.24	0.68
THICK_precuneus	nonoilyfish_overallfreq	IVW(MRE)	20	-0.194769	0.181769	(-0.55, 0.16)	0.28	0.68
THICK_supramarginal	nonoilyfish_overallfreq	IVW(MRE)	20	-0.146226	0.1388	(-0.42, 0.13)	0.29	0.68
THICK_temporalpole	nonoilyfish_overallfreq	IVW(MRE)	6	-0.0830318	0.0851084	(-0.25, 0.08)	0.33	0.68
SA_parsorbitalis	nonoilyfish_overallfreq	IVW(MRE)	12	0.000232044	0.00024944	(0, 0)	0.35	0.7
THICK_caudalanteriorcingulate	nonoilyfish_overallfreq	IVW(MRE)	10	-0.0559235	0.0665031	(-0.19, 0.07)	0.4	0.755556
THICK_parahippocampal	nonoilyfish_overallfreq	IVW(MRE)	26	-0.0374905	0.0436079	(-0.12, 0.05)	0.39	0.755556
SA_caudalmiddlefrontal	nonoilyfish_overallfreq	IVW(MRE)	28	-2.69974e-05	3.38466e-05	(0, 0)	0.43	0.769474
SA_parahippocampal	nonoilyfish_overallfreq	IVW(MRE)	15	0.000118945	0.000147123	(0, 0)	0.42	0.769474
SA_lateraloccipital	nonoilyfish_overallfreq	IVW(MRE)	20	-2.31586e-05	3.0873e-05	(0, 0)	0.45	0.784615
SA_isthmuscingulate	nonoilyfish_overallfreq	IVW(MRE)	20	6.97469e-05	9.74709e-05	(0, 0)	0.47	0.799
SA_precuneus	nonoilyfish_overallfreq	IVW(MRE)	31	2.04695e-05	2.96547e-05	(0, 0)	0.49	0.812683
SA_precentral	nonoilyfish_overallfreq	IVW(MRE)	25	-1.31329e-05	2.38569e-05	(0, 0)	0.58	0.876444
THICK_caudalmiddlefrontal	nonoilyfish_overallfreq	IVW(MRE)	12	0.0858302	0.156742	(-0.22, 0.39)	0.58	0.876444
THICK_precentral	nonoilyfish_overallfreq	IVW(MRE)	14	-0.0750351	0.127114	(-0.32, 0.17)	0.55	0.876444
THICK_transversetemporal	nonoilyfish_overallfreq	IVW(MRE)	12	0.0325067	0.0588884	(-0.08, 0.15)	0.58	0.876444
SA_inferiorparietal	nonoilyfish_overallfreq	IVW(MRE)	31	1.03119e-05	2.19038e-05	(0, 0)	0.64	0.888163
SA_rostralmiddlefrontal	nonoilyfish_overallfreq	IVW(MRE)	30	-1.1547e-05	2.41271e-05	(0, 0)	0.63	0.888163
THICK_bankssts	nonoilyfish_overallfreq	IVW(MRE)	12	-0.069068	0.145198	(-0.35, 0.22)	0.63	0.888163
THICK_superiortemporal	nonoilyfish_overallfreq	IVW(MRE)	11	0.0786775	0.161542	(-0.24, 0.4)	0.63	0.888163
SA_insula	nonoilyfish_overallfreq	IVW(MRE)	29	-2.59265e-05	6.21701e-05	(0, 0)	0.68	0.906667
THICK_paracentral	nonoilyfish_overallfreq	IVW(MRE)	14	-0.0477028	0.111347	(-0.27, 0.17)	0.67	0.906667
SA_paracentral	nonoilyfish_overallfreq	IVW(MRE)	26	1.81763e-05	5.88438e-05	(0, 0)	0.76	0.957037
SA_parsopercularis	nonoilyfish_overallfreq	IVW(MRE)	20	1.48751e-05	4.72813e-05	(0, 0)	0.75	0.957037
THICK_parsorbitalis	nonoilyfish_overallfreq	IVW(MRE)	12	0.0289344	0.0911199	(-0.15, 0.21)	0.75	0.957037
SA_cuneus	nonoilyfish_overallfreq	IVW(MRE)	23	-2.1398e-05	8.30554e-05	(0, 0)	0.8	0.989091
SA_bankssts	nonoilyfish_overallfreq	IVW(MRE)	19	1.79782e-05	0.000105526	(0, 0)	0.86	0.999394
SA_parstriangularis	nonoilyfish_overallfreq	IVW(MRE)	27	2.48647e-06	5.87019e-05	(0, 0)	0.97	0.999394
SA_pericalcarine	nonoilyfish_overallfreq	IVW(MRE)	39	3.65842e-06	4.18034e-05	(0, 0)	0.93	0.999394
SA_superiorparietal	nonoilyfish_overallfreq	IVW(MRE)	28	1.42674e-06	1.84427e-05	(0, 0)	0.94	0.999394
SA_supramarginal	nonoilyfish_overallfreq	IVW(MRE)	24	3.5987e-06	3.33517e-05	(0, 0)	0.91	0.999394
THICK_lingual	nonoilyfish_overallfreq	IVW(MRE)	14	0.0233381	0.159776	(-0.29, 0.34)	0.88	0.999394
THICK_middletemporal	nonoilyfish_overallfreq	IVW(MRE)	10	0.00751252	0.200664	(-0.39, 0.4)	0.97	0.999394
THICK_pericalcarine	nonoilyfish_overallfreq	IVW(MRE)	18	0.0125911	0.0997885	(-0.18, 0.21)	0.9	0.999394
THICK_postcentral	nonoilyfish_overallfreq	IVW(MRE)	24	-0.0031009	0.0925558	(-0.18, 0.18)	0.97	0.999394
THICK_rostralmiddlefrontal	nonoilyfish_overallfreq	IVW(MRE)	14	-0.0207289	0.161574	(-0.34, 0.3)	0.9	0.999394
THICK_superiorfrontal	nonoilyfish_overallfreq	IVW(MRE)	22	-0.0053903	0.113001	(-0.23, 0.22)	0.96	0.999394
THICK_inferiorparietal	nonoilyfish_overallfreq	IVW(MRE)	13	-0.000688451	0.199296	(-0.39, 0.39)	1	1
THICK_lateralorbitofrontal	nonoilyfish_overallfreq	IVW(MRE)	7	0.00226866	0.130244	(-0.25, 0.26)	0.99	1
THICK_paracentral	oilyfish_overallfreq	IVW(MRE)	14	-0.471527	0.125686	(-0.72, -0.23)	0.00018	0.01224
SA_transversetemporal	oilyfish_overallfreq	IVW(MRE)	35	-0.000452044	0.000222197	(0, 0)	0.042	0.498667
THICK_caudalanteriorcingulate	oilyfish_overallfreq	IVW(MRE)	10	-0.162841	0.0807356	(-0.32, 0)	0.044	0.498667
THICK_precentral	oilyfish_overallfreq	IVW(MRE)	14	0.399077	0.19509	(0.02, 0.78)	0.041	0.498667
THICK_superiorparietal	oilyfish_overallfreq	IVW(MRE)	14	0.417822	0.200785	(0.02, 0.81)	0.037	0.498667
THICK_superiortemporal	oilyfish_overallfreq	IVW(MRE)	11	0.392652	0.177071	(0.05, 0.74)	0.027	0.498667
THICK_cuneus	oilyfish_overallfreq	IVW(MRE)	8	0.404666	0.212937	(-0.01, 0.82)	0.06	0.582857
SA_inferiortemporal	oilyfish_overallfreq	IVW(MRE)	27	6.94e-05	3.8e-05	(0, 0)	0.07	0.595
SA_parsopercularis	oilyfish_overallfreq	IVW(MRE)	20	0.000103083	5.94e-05	(0, 0)	0.08	0.604444
SA_bankssts	oilyfish_overallfreq	IVW(MRE)	19	0.00021234	0.000166469	(0, 0)	0.2	0.618182
SA_entorhinal	oilyfish_overallfreq	IVW(MRE)	15	-0.000237284	0.000166477	(0, 0)	0.15	0.618182
SA_lingual	oilyfish_overallfreq	IVW(MRE)	39	4.04e-05	3.15e-05	(0, 0)	0.2	0.618182
SA_medialorbitofrontal	oilyfish_overallfreq	IVW(MRE)	10	-0.000149807	0.000107446	(0, 0)	0.16	0.618182
SA_postcentral	oilyfish_overallfreq	IVW(MRE)	21	6.16e-05	4.56e-05	(0, 0)	0.18	0.618182
SA_superiortemporal	oilyfish_overallfreq	IVW(MRE)	22	-8.12e-05	6.25e-05	(0, 0)	0.19	0.618182
THICK_entorhinal	oilyfish_overallfreq	IVW(MRE)	9	-0.126692	0.0856844	(-0.29, 0.04)	0.14	0.618182
THICK_fusiform	oilyfish_overallfreq	IVW(MRE)	8	-0.193794	0.125997	(-0.44, 0.05)	0.12	0.618182
THICK_insula	oilyfish_overallfreq	IVW(MRE)	14	-0.15112	0.105389	(-0.36, 0.06)	0.15	0.618182
THICK_parstriangularis	oilyfish_overallfreq	IVW(MRE)	18	-0.151048	0.0942885	(-0.34, 0.03)	0.11	0.618182
THICK_postcentral	oilyfish_overallfreq	IVW(MRE)	24	-0.157108	0.114824	(-0.38, 0.07)	0.17	0.618182
THICK_rostralmiddlefrontal	oilyfish_overallfreq	IVW(MRE)	14	-0.280423	0.19792	(-0.67, 0.11)	0.16	0.618182
THICK_transversetemporal	oilyfish_overallfreq	IVW(MRE)	12	-0.121394	0.083555	(-0.29, 0.04)	0.15	0.618182
SA_frontalpole	oilyfish_overallfreq	IVW(MRE)	11	-0.000310936	0.000257913	(0, 0)	0.23	0.6256
THICK_posteriorcingulate	oilyfish_overallfreq	IVW(MRE)	13	-0.0873936	0.07238	(-0.23, 0.05)	0.23	0.6256
THICK_temporalpole	oilyfish_overallfreq	IVW(MRE)	6	0.0606447	0.0509387	(-0.04, 0.16)	0.23	0.6256
THICK_lateraloccipital	oilyfish_overallfreq	IVW(MRE)	13	0.233139	0.197729	(-0.15, 0.62)	0.24	0.627692
SA_caudalanteriorcingulate	oilyfish_overallfreq	IVW(MRE)	15	0.000143698	0.000135199	(0, 0)	0.29	0.636129
SA_rostralanteriorcingulate	oilyfish_overallfreq	IVW(MRE)	16	-0.00014847	0.000140067	(0, 0)	0.29	0.636129
SA_rostralmiddlefrontal	oilyfish_overallfreq	IVW(MRE)	30	-2.97e-05	2.75e-05	(0, 0)	0.28	0.636129
SA_superiorfrontal	oilyfish_overallfreq	IVW(MRE)	23	-3.25e-05	3.06e-05	(0, 0)	0.29	0.636129
THICK_rostralanteriorcingulate	oilyfish_overallfreq	IVW(MRE)	23	-0.0563336	0.0519758	(-0.16, 0.05)	0.28	0.636129
SA_middletemporal	oilyfish_overallfreq	IVW(MRE)	22	6.38e-05	6.19e-05	(0, 0)	0.3	0.6375
THICK_medialorbitofrontal	oilyfish_overallfreq	IVW(MRE)	14	-0.0892547	0.0878476	(-0.26, 0.08)	0.31	0.638788
THICK_lingual	oilyfish_overallfreq	IVW(MRE)	14	-0.186802	0.189663	(-0.56, 0.18)	0.32	0.64
SA_lateraloccipital	oilyfish_overallfreq	IVW(MRE)	20	-3.96e-05	4.61e-05	(0, 0)	0.39	0.68
SA_parsorbitalis	oilyfish_overallfreq	IVW(MRE)	12	0.000318938	0.000361065	(0, 0)	0.38	0.68
SA_precentral	oilyfish_overallfreq	IVW(MRE)	25	-2.8e-05	3.16e-05	(0, 0)	0.37	0.68
THICK_caudalmiddlefrontal	oilyfish_overallfreq	IVW(MRE)	12	0.130957	0.150153	(-0.16, 0.43)	0.38	0.68
THICK_parsopercularis	oilyfish_overallfreq	IVW(MRE)	16	0.145751	0.155982	(-0.16, 0.45)	0.35	0.68
THICK_parahippocampal	oilyfish_overallfreq	IVW(MRE)	26	-0.0312413	0.0383771	(-0.11, 0.04)	0.42	0.714
SA_caudalmiddlefrontal	oilyfish_overallfreq	IVW(MRE)	28	-2.91e-05	3.77e-05	(0, 0)	0.44	0.729756
SA_paracentral	oilyfish_overallfreq	IVW(MRE)	26	-5.75e-05	8.12e-05	(0, 0)	0.48	0.777143
SA_inferiorparietal	oilyfish_overallfreq	IVW(MRE)	31	1.65e-05	2.43e-05	(0, 0)	0.5	0.790698
SA_superiorparietal	oilyfish_overallfreq	IVW(MRE)	28	1.66e-05	2.6e-05	(0, 0)	0.52	0.803636
SA_fusiform	oilyfish_overallfreq	IVW(MRE)	19	3.75e-05	6.71e-05	(0, 0)	0.58	0.804898
SA_insula	oilyfish_overallfreq	IVW(MRE)	29	3.71e-05	6.49e-05	(0, 0)	0.57	0.804898
SA_posteriorcingulate	oilyfish_overallfreq	IVW(MRE)	24	9.84e-05	0.000163638	(0, 0)	0.55	0.804898
SA_precuneus	oilyfish_overallfreq	IVW(MRE)	31	2.43e-05	4.13e-05	(0, 0)	0.56	0.804898
THICK_lateralorbitofrontal	oilyfish_overallfreq	IVW(MRE)	7	-0.10399	0.171057	(-0.44, 0.23)	0.54	0.804898
SA_isthmuscingulate	oilyfish_overallfreq	IVW(MRE)	20	5.99e-05	0.000114103	(0, 0)	0.6	0.816
SA_cuneus	oilyfish_overallfreq	IVW(MRE)	23	1.83e-05	0.000104272	(0, 0)	0.86	0.899692
SA_lateralorbitofrontal	oilyfish_overallfreq	IVW(MRE)	24	1.51e-05	7.41e-05	(0, 0)	0.84	0.899692
SA_parahippocampal	oilyfish_overallfreq	IVW(MRE)	15	-5.33e-05	0.000203732	(0, 0)	0.79	0.899692
SA_pericalcarine	oilyfish_overallfreq	IVW(MRE)	39	1.01e-05	5.31e-05	(0, 0)	0.85	0.899692
THICK_bankssts	oilyfish_overallfreq	IVW(MRE)	12	-0.0491246	0.201686	(-0.44, 0.35)	0.81	0.899692
THICK_frontalpole	oilyfish_overallfreq	IVW(MRE)	12	0.0247175	0.0678108	(-0.11, 0.16)	0.72	0.899692
THICK_inferiorparietal	oilyfish_overallfreq	IVW(MRE)	13	-0.0617127	0.173969	(-0.4, 0.28)	0.72	0.899692
THICK_inferiortemporal	oilyfish_overallfreq	IVW(MRE)	18	0.0346704	0.144361	(-0.25, 0.32)	0.81	0.899692
THICK_isthmuscingulate	oilyfish_overallfreq	IVW(MRE)	28	-0.0126544	0.0689611	(-0.15, 0.12)	0.85	0.899692
THICK_middletemporal	oilyfish_overallfreq	IVW(MRE)	10	-0.0426524	0.240469	(-0.51, 0.43)	0.86	0.899692
THICK_parsorbitalis	oilyfish_overallfreq	IVW(MRE)	12	-0.0317917	0.125902	(-0.28, 0.21)	0.8	0.899692
THICK_pericalcarine	oilyfish_overallfreq	IVW(MRE)	18	0.0304445	0.138134	(-0.24, 0.3)	0.83	0.899692
THICK_precuneus	oilyfish_overallfreq	IVW(MRE)	20	0.0755577	0.20424	(-0.32, 0.48)	0.71	0.899692
THICK_superiorfrontal	oilyfish_overallfreq	IVW(MRE)	22	-0.0666798	0.196411	(-0.45, 0.32)	0.73	0.899692
THICK_supramarginal	oilyfish_overallfreq	IVW(MRE)	20	-0.0535735	0.166943	(-0.38, 0.27)	0.75	0.899692
SA_parstriangularis	oilyfish_overallfreq	IVW(MRE)	27	-7.82e-06	4.99e-05	(0, 0)	0.88	0.906667
SA_supramarginal	oilyfish_overallfreq	IVW(MRE)	24	-2.79e-06	2.79e-05	(0, 0)	0.92	0.92
SA_temporalpole	oilyfish_overallfreq	IVW(MRE)	15	-4.4e-05	0.000446994	(0, 0)	0.92	0.92
SA_parstriangularis	pork_overallfreq	IVW(MRE)	27	-0.000145829	4.88e-05	(0, 0)	0.0028	0.1292
THICK_lateralorbitofrontal	pork_overallfreq	IVW(MRE)	7	-0.139634	0.0483104	(-0.23, -0.04)	0.0038	0.1292
SA_caudalanteriorcingulate	pork_overallfreq	IVW(MRE)	15	0.000356932	0.00013648	(0, 0)	0.0089	0.201733
THICK_cuneus	pork_overallfreq	IVW(MRE)	8	0.284794	0.113149	(0.06, 0.51)	0.012	0.204
SA_medialorbitofrontal	pork_overallfreq	IVW(MRE)	10	0.000163619	8.32e-05	(0, 0)	0.049	0.476
SA_temporalpole	pork_overallfreq	IVW(MRE)	15	0.000470317	0.000233325	(0, 0)	0.044	0.476
THICK_postcentral	pork_overallfreq	IVW(MRE)	24	-0.204642	0.101811	(-0.4, -0.01)	0.044	0.476
THICK_insula	pork_overallfreq	IVW(MRE)	14	-0.192531	0.110738	(-0.41, 0.02)	0.08	0.604444
THICK_isthmuscingulate	pork_overallfreq	IVW(MRE)	28	0.0919383	0.0532601	(-0.01, 0.2)	0.08	0.604444
SA_precuneus	pork_overallfreq	IVW(MRE)	31	-4.48e-05	2.7e-05	(0, 0)	0.1	0.68
SA_caudalmiddlefrontal	pork_overallfreq	IVW(MRE)	28	-4.76e-05	3.22e-05	(0, 0)	0.14	0.728571
SA_inferiortemporal	pork_overallfreq	IVW(MRE)	27	-5.57e-05	3.6e-05	(0, 0)	0.12	0.728571
THICK_caudalanteriorcingulate	pork_overallfreq	IVW(MRE)	10	0.0802737	0.0556708	(-0.03, 0.19)	0.15	0.728571
THICK_posteriorcingulate	pork_overallfreq	IVW(MRE)	13	0.127601	0.0834923	(-0.04, 0.29)	0.13	0.728571
SA_isthmuscingulate	pork_overallfreq	IVW(MRE)	20	-0.000102293	8.59e-05	(0, 0)	0.23	0.803636
SA_lingual	pork_overallfreq	IVW(MRE)	39	3e-05	2.56e-05	(0, 0)	0.24	0.803636
SA_postcentral	pork_overallfreq	IVW(MRE)	21	5.76e-05	4.8e-05	(0, 0)	0.23	0.803636
SA_transversetemporal	pork_overallfreq	IVW(MRE)	35	0.000188304	0.00016298	(0, 0)	0.25	0.803636
THICK_entorhinal	pork_overallfreq	IVW(MRE)	9	-0.0564249	0.0478999	(-0.15, 0.04)	0.24	0.803636
THICK_inferiorparietal	pork_overallfreq	IVW(MRE)	13	0.165088	0.148088	(-0.13, 0.46)	0.26	0.803636
THICK_middletemporal	pork_overallfreq	IVW(MRE)	10	-0.187799	0.146744	(-0.48, 0.1)	0.2	0.803636
THICK_precentral	pork_overallfreq	IVW(MRE)	14	-0.141303	0.105265	(-0.35, 0.07)	0.18	0.803636
SA_cuneus	pork_overallfreq	IVW(MRE)	23	7.76e-05	7.69e-05	(0, 0)	0.31	0.878333
SA_parsopercularis	pork_overallfreq	IVW(MRE)	20	7.2e-05	7.08e-05	(0, 0)	0.31	0.878333
SA_parsorbitalis	pork_overallfreq	IVW(MRE)	12	0.000307366	0.000361951	(0, 0)	0.4	0.937931
SA_precentral	pork_overallfreq	IVW(MRE)	25	1.77e-05	1.9e-05	(0, 0)	0.35	0.937931
SA_rostralmiddlefrontal	pork_overallfreq	IVW(MRE)	30	-1.98e-05	2.35e-05	(0, 0)	0.4	0.937931
SA_superiorfrontal	pork_overallfreq	IVW(MRE)	23	-2.27e-05	2.53e-05	(0, 0)	0.37	0.937931
THICK_superiorfrontal	pork_overallfreq	IVW(MRE)	22	-0.142194	0.166238	(-0.47, 0.18)	0.39	0.937931
SA_superiorparietal	pork_overallfreq	IVW(MRE)	28	2.22e-05	2.79e-05	(0, 0)	0.43	0.974667
THICK_transversetemporal	pork_overallfreq	IVW(MRE)	12	0.0481052	0.0637781	(-0.08, 0.17)	0.45	0.987097
SA_bankssts	pork_overallfreq	IVW(MRE)	19	3.09e-05	0.000117148	(0, 0)	0.79	0.99
SA_entorhinal	pork_overallfreq	IVW(MRE)	15	8.82e-05	0.000221993	(0, 0)	0.69	0.99
SA_frontalpole	pork_overallfreq	IVW(MRE)	11	-0.000259371	0.000474141	(0, 0)	0.58	0.99
SA_fusiform	pork_overallfreq	IVW(MRE)	19	9.65e-06	4.69e-05	(0, 0)	0.84	0.99
SA_inferiorparietal	pork_overallfreq	IVW(MRE)	31	-1.23e-05	1.99e-05	(0, 0)	0.54	0.99
SA_insula	pork_overallfreq	IVW(MRE)	29	-1.83e-05	5.7e-05	(0, 0)	0.75	0.99
SA_lateraloccipital	pork_overallfreq	IVW(MRE)	20	-1.36e-05	3.7e-05	(0, 0)	0.71	0.99
SA_lateralorbitofrontal	pork_overallfreq	IVW(MRE)	24	1.15e-05	5.78e-05	(0, 0)	0.84	0.99
SA_middletemporal	pork_overallfreq	IVW(MRE)	22	-2.08e-05	5.38e-05	(0, 0)	0.7	0.99
SA_paracentral	pork_overallfreq	IVW(MRE)	26	1.39e-06	5.41e-05	(0, 0)	0.98	0.99
SA_parahippocampal	pork_overallfreq	IVW(MRE)	15	5.64e-05	0.000193633	(0, 0)	0.77	0.99
SA_pericalcarine	pork_overallfreq	IVW(MRE)	39	3.06e-06	3.17e-05	(0, 0)	0.92	0.99
SA_posteriorcingulate	pork_overallfreq	IVW(MRE)	24	-2.55e-05	0.000125621	(0, 0)	0.84	0.99
SA_rostralanteriorcingulate	pork_overallfreq	IVW(MRE)	16	6.08e-05	0.00010416	(0, 0)	0.56	0.99
SA_superiortemporal	pork_overallfreq	IVW(MRE)	22	7.91e-06	3.97e-05	(0, 0)	0.84	0.99
SA_supramarginal	pork_overallfreq	IVW(MRE)	24	1.47e-05	2.28e-05	(0, 0)	0.52	0.99
THICK_bankssts	pork_overallfreq	IVW(MRE)	12	-0.0633687	0.132096	(-0.32, 0.2)	0.63	0.99
THICK_caudalmiddlefrontal	pork_overallfreq	IVW(MRE)	12	-0.00716427	0.109302	(-0.22, 0.21)	0.95	0.99
THICK_frontalpole	pork_overallfreq	IVW(MRE)	12	-0.00822647	0.0645199	(-0.13, 0.12)	0.9	0.99
THICK_fusiform	pork_overallfreq	IVW(MRE)	8	-0.10339	0.229054	(-0.55, 0.35)	0.65	0.99
THICK_inferiortemporal	pork_overallfreq	IVW(MRE)	18	-0.0506295	0.102804	(-0.25, 0.15)	0.62	0.99
THICK_lateraloccipital	pork_overallfreq	IVW(MRE)	13	0.0430077	0.12066	(-0.19, 0.28)	0.72	0.99
THICK_lingual	pork_overallfreq	IVW(MRE)	14	-0.0429956	0.179682	(-0.4, 0.31)	0.81	0.99
THICK_medialorbitofrontal	pork_overallfreq	IVW(MRE)	14	0.00164474	0.118434	(-0.23, 0.23)	0.99	0.99
THICK_paracentral	pork_overallfreq	IVW(MRE)	14	-0.0185234	0.0967665	(-0.21, 0.17)	0.85	0.99
THICK_parahippocampal	pork_overallfreq	IVW(MRE)	26	0.000672471	0.0300127	(-0.06, 0.06)	0.98	0.99
THICK_parsopercularis	pork_overallfreq	IVW(MRE)	16	-0.024849	0.153041	(-0.32, 0.28)	0.87	0.99
THICK_parsorbitalis	pork_overallfreq	IVW(MRE)	12	0.0160634	0.0714256	(-0.12, 0.16)	0.82	0.99
THICK_parstriangularis	pork_overallfreq	IVW(MRE)	18	-0.00643352	0.104202	(-0.21, 0.2)	0.95	0.99
THICK_pericalcarine	pork_overallfreq	IVW(MRE)	18	-0.0281896	0.120952	(-0.27, 0.21)	0.82	0.99
THICK_precuneus	pork_overallfreq	IVW(MRE)	20	0.00668108	0.14638	(-0.28, 0.29)	0.96	0.99
THICK_rostralanteriorcingulate	pork_overallfreq	IVW(MRE)	23	-0.0464183	0.0658581	(-0.18, 0.08)	0.48	0.99
THICK_rostralmiddlefrontal	pork_overallfreq	IVW(MRE)	14	-0.0429578	0.161048	(-0.36, 0.27)	0.79	0.99
THICK_superiorparietal	pork_overallfreq	IVW(MRE)	14	-0.0918923	0.141731	(-0.37, 0.19)	0.52	0.99
THICK_superiortemporal	pork_overallfreq	IVW(MRE)	11	-0.0769712	0.151727	(-0.37, 0.22)	0.61	0.99
THICK_supramarginal	pork_overallfreq	IVW(MRE)	20	-0.00803254	0.178181	(-0.36, 0.34)	0.96	0.99
THICK_temporalpole	pork_overallfreq	IVW(MRE)	6	-0.036104	0.0737485	(-0.18, 0.11)	0.62	0.99
SA_bankssts	Protein	IVW(MRE)	17	5.59186e-05	0.000142904	(0, 0)	0.7	0.887458
SA_caudalanteriorcingulate	Protein	IVW(MRE)	14	-7.80926e-05	0.000221058	(0, 0)	0.72	0.887458
SA_caudalmiddlefrontal	Protein	IVW(MRE)	27	4.1933e-05	4.70618e-05	(0, 0)	0.37	0.887458
SA_cuneus	Protein	IVW(MRE)	23	2.89465e-05	8.78342e-05	(0, 0)	0.74	0.887458
SA_entorhinal	Protein	IVW(MRE)	14	-0.000100191	0.00020425	(0, 0)	0.62	0.887458
SA_frontalpole	Protein	IVW(MRE)	10	-0.000411775	0.000579266	(0, 0)	0.48	0.887458
SA_fusiform	Protein	IVW(MRE)	19	-3.37515e-05	6.40398e-05	(0, 0)	0.6	0.887458
SA_inferiortemporal	Protein	IVW(MRE)	21	-2.30403e-05	5.89865e-05	(0, 0)	0.7	0.887458
SA_insula	Protein	IVW(MRE)	27	-3.98712e-05	8.27132e-05	(0, 0)	0.63	0.887458
SA_isthmuscingulate	Protein	IVW(MRE)	17	8.39767e-05	0.000155866	(0, 0)	0.59	0.887458
SA_lateraloccipital	Protein	IVW(MRE)	20	2.39433e-05	4.61534e-05	(0, 0)	0.6	0.887458
SA_lateralorbitofrontal	Protein	IVW(MRE)	22	-3.5958e-05	7.92425e-05	(0, 0)	0.65	0.887458
SA_lingual	Protein	IVW(MRE)	36	-1.70164e-05	4.05353e-05	(0, 0)	0.67	0.887458
SA_medialorbitofrontal	Protein	IVW(MRE)	9	0.00031469	0.000195488	(0, 0)	0.11	0.887458
SA_paracentral	Protein	IVW(MRE)	24	-5.52449e-05	9.61086e-05	(0, 0)	0.57	0.887458
SA_parsorbitalis	Protein	IVW(MRE)	11	0.000179357	0.000226077	(0, 0)	0.43	0.887458
SA_parstriangularis	Protein	IVW(MRE)	24	-8.88989e-05	7.72828e-05	(0, 0)	0.25	0.887458
SA_pericalcarine	Protein	IVW(MRE)	34	8.8574e-05	6.36402e-05	(0, 0)	0.16	0.887458
SA_posteriorcingulate	Protein	IVW(MRE)	22	0.000118427	0.000137963	(0, 0)	0.39	0.887458
SA_precentral	Protein	IVW(MRE)	22	-5.50628e-05	2.79884e-05	(0, 0)	0.049	0.887458
SA_precuneus	Protein	IVW(MRE)	32	-5.147e-05	4.19542e-05	(0, 0)	0.22	0.887458
SA_rostralmiddlefrontal	Protein	IVW(MRE)	28	-1.88046e-05	3.89283e-05	(0, 0)	0.63	0.887458
SA_superiorfrontal	Protein	IVW(MRE)	22	-2.42233e-05	3.47525e-05	(0, 0)	0.49	0.887458
SA_superiorparietal	Protein	IVW(MRE)	27	2.36023e-05	2.56537e-05	(0, 0)	0.36	0.887458
SA_superiortemporal	Protein	IVW(MRE)	19	-7.80157e-05	5.8487e-05	(0, 0)	0.18	0.887458
SA_temporalpole	Protein	IVW(MRE)	14	0.000473973	0.00042843	(0, 0)	0.27	0.887458
SA_transversetemporal	Protein	IVW(MRE)	35	0.000151715	0.000204879	(0, 0)	0.46	0.887458
THICK_bankssts	Protein	IVW(MRE)	11	0.120101	0.171062	(-0.22, 0.46)	0.48	0.887458
THICK_caudalanteriorcingulate	Protein	IVW(MRE)	9	-0.190932	0.104788	(-0.4, 0.01)	0.07	0.887458
THICK_caudalmiddlefrontal	Protein	IVW(MRE)	11	0.147285	0.254987	(-0.35, 0.65)	0.56	0.887458
THICK_entorhinal	Protein	IVW(MRE)	9	0.0260158	0.0501351	(-0.07, 0.12)	0.6	0.887458
THICK_frontalpole	Protein	IVW(MRE)	12	0.0410736	0.0691344	(-0.09, 0.18)	0.55	0.887458
THICK_fusiform	Protein	IVW(MRE)	7	-0.0887191	0.178874	(-0.44, 0.26)	0.62	0.887458
THICK_inferiorparietal	Protein	IVW(MRE)	13	0.0887445	0.243293	(-0.39, 0.57)	0.72	0.887458
THICK_inferiortemporal	Protein	IVW(MRE)	15	0.121511	0.140117	(-0.15, 0.4)	0.39	0.887458
THICK_insula	Protein	IVW(MRE)	11	-0.17841	0.156768	(-0.49, 0.13)	0.26	0.887458
THICK_lateraloccipital	Protein	IVW(MRE)	12	-0.105543	0.176601	(-0.45, 0.24)	0.55	0.887458
THICK_lateralorbitofrontal	Protein	IVW(MRE)	7	0.106475	0.153317	(-0.19, 0.41)	0.49	0.887458
THICK_lingual	Protein	IVW(MRE)	14	0.162773	0.260793	(-0.35, 0.67)	0.53	0.887458
THICK_medialorbitofrontal	Protein	IVW(MRE)	13	0.150175	0.124423	(-0.09, 0.39)	0.23	0.887458
THICK_middletemporal	Protein	IVW(MRE)	10	0.0633149	0.146044	(-0.22, 0.35)	0.66	0.887458
THICK_paracentral	Protein	IVW(MRE)	14	-0.157196	0.152724	(-0.46, 0.14)	0.3	0.887458
THICK_parahippocampal	Protein	IVW(MRE)	24	-0.0170378	0.0483553	(-0.11, 0.08)	0.72	0.887458
THICK_parsopercularis	Protein	IVW(MRE)	13	0.0835991	0.214301	(-0.34, 0.5)	0.7	0.887458
THICK_parsorbitalis	Protein	IVW(MRE)	11	0.184241	0.081061	(0.03, 0.34)	0.023	0.887458
THICK_parstriangularis	Protein	IVW(MRE)	17	0.0725673	0.16852	(-0.26, 0.4)	0.67	0.887458
THICK_pericalcarine	Protein	IVW(MRE)	18	0.111083	0.137199	(-0.16, 0.38)	0.42	0.887458
THICK_postcentral	Protein	IVW(MRE)	23	-0.102807	0.13607	(-0.37, 0.16)	0.45	0.887458
THICK_posteriorcingulate	Protein	IVW(MRE)	11	-0.328023	0.161124	(-0.64, -0.01)	0.042	0.887458
THICK_precentral	Protein	IVW(MRE)	13	0.153875	0.168755	(-0.18, 0.48)	0.36	0.887458
THICK_precuneus	Protein	IVW(MRE)	20	0.215581	0.234788	(-0.24, 0.68)	0.36	0.887458
THICK_rostralanteriorcingulate	Protein	IVW(MRE)	22	-0.0306199	0.103271	(-0.23, 0.17)	0.77	0.887458
THICK_rostralmiddlefrontal	Protein	IVW(MRE)	11	-0.0663132	0.203502	(-0.47, 0.33)	0.74	0.887458
THICK_superiorfrontal	Protein	IVW(MRE)	20	-0.193343	0.149082	(-0.49, 0.1)	0.19	0.887458
THICK_superiorparietal	Protein	IVW(MRE)	15	0.150602	0.184899	(-0.21, 0.51)	0.42	0.887458
THICK_superiortemporal	Protein	IVW(MRE)	8	-0.0675295	0.218588	(-0.5, 0.36)	0.76	0.887458
THICK_supramarginal	Protein	IVW(MRE)	19	-0.051171	0.170508	(-0.39, 0.28)	0.76	0.887458
THICK_temporalpole	Protein	IVW(MRE)	6	-0.05569	0.0929192	(-0.24, 0.13)	0.55	0.887458
THICK_transversetemporal	Protein	IVW(MRE)	10	-0.0335851	0.0957956	(-0.22, 0.15)	0.73	0.887458
SA_parsopercularis	Protein	IVW(MRE)	19	2.48091e-05	9.97032e-05	(0, 0)	0.8	0.891803
SA_rostralanteriorcingulate	Protein	IVW(MRE)	15	3.88088e-05	0.000152036	(0, 0)	0.8	0.891803
SA_middletemporal	Protein	IVW(MRE)	22	-1.29288e-05	5.7941e-05	(0, 0)	0.82	0.899355
SA_parahippocampal	Protein	IVW(MRE)	13	5.30768e-05	0.000275293	(0, 0)	0.85	0.903125
SA_postcentral	Protein	IVW(MRE)	20	1.1689e-05	5.6499e-05	(0, 0)	0.84	0.903125
SA_supramarginal	Protein	IVW(MRE)	21	-6.13339e-06	3.7693e-05	(0, 0)	0.87	0.910154
THICK_cuneus	Protein	IVW(MRE)	8	-0.0328655	0.378109	(-0.77, 0.71)	0.93	0.958182
THICK_isthmuscingulate	Protein	IVW(MRE)	26	-0.00518963	0.0793666	(-0.16, 0.15)	0.95	0.964179
SA_inferiorparietal	Protein	IVW(MRE)	30	-7.887e-07	2.51429e-05	(0, 0)	0.97	0.97
SA_posteriorcingulate	rawveg_TBSperday	IVW(MRE)	24	0.000289073	0.000113455	(0, 0)	0.011	0.249333
SA_precuneus	rawveg_TBSperday	IVW(MRE)	31	6.59e-05	2.41e-05	(0, 0)	0.0063	0.249333
SA_superiorparietal	rawveg_TBSperday	IVW(MRE)	28	6.19e-05	2.37e-05	(0, 0)	0.0091	0.249333
THICK_insula	rawveg_TBSperday	IVW(MRE)	14	0.316812	0.132935	(0.06, 0.58)	0.017	0.289
SA_parahippocampal	rawveg_TBSperday	IVW(MRE)	15	-0.000301277	0.00014302	(0, 0)	0.035	0.476
SA_postcentral	rawveg_TBSperday	IVW(MRE)	21	7.2e-05	3.85e-05	(0, 0)	0.06	0.51
SA_supramarginal	rawveg_TBSperday	IVW(MRE)	24	5.16e-05	2.71e-05	(0, 0)	0.06	0.51
THICK_paracentral	rawveg_TBSperday	IVW(MRE)	14	-0.170879	0.0907786	(-0.35, 0.01)	0.06	0.51
THICK_parstriangularis	rawveg_TBSperday	IVW(MRE)	18	0.218123	0.119991	(-0.02, 0.45)	0.07	0.528889
THICK_precuneus	rawveg_TBSperday	IVW(MRE)	20	0.213143	0.120491	(-0.02, 0.45)	0.08	0.544
THICK_isthmuscingulate	rawveg_TBSperday	IVW(MRE)	28	-0.118705	0.0699847	(-0.26, 0.02)	0.09	0.556364
SA_inferiorparietal	rawveg_TBSperday	IVW(MRE)	31	2.98e-05	1.85e-05	(0, 0)	0.11	0.623333
SA_cuneus	rawveg_TBSperday	IVW(MRE)	23	-9.9e-05	7.58e-05	(0, 0)	0.19	0.8
SA_superiortemporal	rawveg_TBSperday	IVW(MRE)	22	-7.39e-05	5.48e-05	(0, 0)	0.18	0.8
SA_transversetemporal	rawveg_TBSperday	IVW(MRE)	35	-0.000236001	0.000166791	(0, 0)	0.16	0.8
THICK_lingual	rawveg_TBSperday	IVW(MRE)	14	0.149545	0.116555	(-0.08, 0.38)	0.2	0.8
THICK_medialorbitofrontal	rawveg_TBSperday	IVW(MRE)	14	0.124377	0.0929717	(-0.06, 0.31)	0.18	0.8
SA_caudalmiddlefrontal	rawveg_TBSperday	IVW(MRE)	28	-3.04e-05	3.36e-05	(0, 0)	0.36	0.82875
SA_insula	rawveg_TBSperday	IVW(MRE)	29	-5.94e-05	6.54e-05	(0, 0)	0.36	0.82875
SA_medialorbitofrontal	rawveg_TBSperday	IVW(MRE)	10	-9.19e-05	9.63e-05	(0, 0)	0.34	0.82875
SA_paracentral	rawveg_TBSperday	IVW(MRE)	26	-7.16e-05	7.86e-05	(0, 0)	0.36	0.82875
SA_parsorbitalis	rawveg_TBSperday	IVW(MRE)	12	0.000279268	0.000321298	(0, 0)	0.38	0.82875
SA_superiorfrontal	rawveg_TBSperday	IVW(MRE)	23	-3.15e-05	3.11e-05	(0, 0)	0.31	0.82875
THICK_bankssts	rawveg_TBSperday	IVW(MRE)	12	0.21669	0.180385	(-0.14, 0.57)	0.23	0.82875
THICK_fusiform	rawveg_TBSperday	IVW(MRE)	8	0.167282	0.150135	(-0.13, 0.46)	0.27	0.82875
THICK_lateraloccipital	rawveg_TBSperday	IVW(MRE)	13	0.201701	0.211062	(-0.21, 0.62)	0.34	0.82875
THICK_lateralorbitofrontal	rawveg_TBSperday	IVW(MRE)	7	0.153416	0.153257	(-0.15, 0.45)	0.32	0.82875
THICK_parsopercularis	rawveg_TBSperday	IVW(MRE)	16	0.107304	0.122511	(-0.13, 0.35)	0.38	0.82875
THICK_pericalcarine	rawveg_TBSperday	IVW(MRE)	18	0.127192	0.11443	(-0.1, 0.35)	0.27	0.82875
THICK_postcentral	rawveg_TBSperday	IVW(MRE)	24	-0.112363	0.111971	(-0.33, 0.11)	0.32	0.82875
THICK_precentral	rawveg_TBSperday	IVW(MRE)	14	0.185999	0.216282	(-0.24, 0.61)	0.39	0.82875
THICK_transversetemporal	rawveg_TBSperday	IVW(MRE)	12	0.0934276	0.0987387	(-0.1, 0.29)	0.34	0.82875
SA_bankssts	rawveg_TBSperday	IVW(MRE)	19	5.44e-05	0.000119733	(0, 0)	0.65	0.863077
SA_caudalanteriorcingulate	rawveg_TBSperday	IVW(MRE)	15	7.65e-05	0.000122152	(0, 0)	0.53	0.863077
SA_fusiform	rawveg_TBSperday	IVW(MRE)	19	3.51e-05	7.07e-05	(0, 0)	0.62	0.863077
SA_inferiortemporal	rawveg_TBSperday	IVW(MRE)	27	2.04e-05	3.55e-05	(0, 0)	0.57	0.863077
SA_lingual	rawveg_TBSperday	IVW(MRE)	39	-1.83e-05	2.48e-05	(0, 0)	0.46	0.863077
SA_parsopercularis	rawveg_TBSperday	IVW(MRE)	20	4.23e-05	6.92e-05	(0, 0)	0.54	0.863077
SA_temporalpole	rawveg_TBSperday	IVW(MRE)	15	-0.000137953	0.000301988	(0, 0)	0.65	0.863077
THICK_caudalanteriorcingulate	rawveg_TBSperday	IVW(MRE)	10	-0.0729618	0.099058	(-0.27, 0.12)	0.46	0.863077
THICK_caudalmiddlefrontal	rawveg_TBSperday	IVW(MRE)	12	0.0539553	0.122077	(-0.19, 0.29)	0.66	0.863077
THICK_cuneus	rawveg_TBSperday	IVW(MRE)	8	-0.0271747	0.0610247	(-0.15, 0.09)	0.66	0.863077
THICK_entorhinal	rawveg_TBSperday	IVW(MRE)	9	-0.0301467	0.0464226	(-0.12, 0.06)	0.52	0.863077
THICK_frontalpole	rawveg_TBSperday	IVW(MRE)	12	-0.0434096	0.0697801	(-0.18, 0.09)	0.53	0.863077
THICK_inferiorparietal	rawveg_TBSperday	IVW(MRE)	13	-0.0944465	0.186296	(-0.46, 0.27)	0.61	0.863077
THICK_parahippocampal	rawveg_TBSperday	IVW(MRE)	26	-0.023573	0.0304892	(-0.08, 0.04)	0.44	0.863077
THICK_parsorbitalis	rawveg_TBSperday	IVW(MRE)	12	-0.0487633	0.0647543	(-0.18, 0.08)	0.45	0.863077
THICK_posteriorcingulate	rawveg_TBSperday	IVW(MRE)	13	0.0640801	0.145263	(-0.22, 0.35)	0.66	0.863077
THICK_rostralmiddlefrontal	rawveg_TBSperday	IVW(MRE)	14	0.117521	0.263683	(-0.4, 0.63)	0.66	0.863077
THICK_superiorparietal	rawveg_TBSperday	IVW(MRE)	14	0.160585	0.228432	(-0.29, 0.61)	0.48	0.863077
THICK_supramarginal	rawveg_TBSperday	IVW(MRE)	20	-0.0814225	0.148344	(-0.37, 0.21)	0.58	0.863077
THICK_temporalpole	rawveg_TBSperday	IVW(MRE)	6	0.0257855	0.0579226	(-0.09, 0.14)	0.66	0.863077
THICK_inferiortemporal	rawveg_TBSperday	IVW(MRE)	18	0.0700445	0.173047	(-0.27, 0.41)	0.69	0.885283
THICK_rostralanteriorcingulate	rawveg_TBSperday	IVW(MRE)	23	-0.0224093	0.0603317	(-0.14, 0.1)	0.71	0.894074
SA_frontalpole	rawveg_TBSperday	IVW(MRE)	11	-0.000106683	0.000381576	(0, 0)	0.78	0.942456
SA_precentral	rawveg_TBSperday	IVW(MRE)	25	-8.25e-06	3.17e-05	(0, 0)	0.79	0.942456
THICK_superiortemporal	rawveg_TBSperday	IVW(MRE)	11	0.0615696	0.233831	(-0.4, 0.52)	0.79	0.942456
SA_middletemporal	rawveg_TBSperday	IVW(MRE)	22	1.17e-05	5.99e-05	(0, 0)	0.85	0.954194
SA_parstriangularis	rawveg_TBSperday	IVW(MRE)	27	-1.08e-05	4.88e-05	(0, 0)	0.83	0.954194
SA_pericalcarine	rawveg_TBSperday	IVW(MRE)	39	-5.66e-06	3.38e-05	(0, 0)	0.87	0.954194
SA_rostralanteriorcingulate	rawveg_TBSperday	IVW(MRE)	16	-1.44e-05	8.15e-05	(0, 0)	0.86	0.954194
SA_rostralmiddlefrontal	rawveg_TBSperday	IVW(MRE)	30	-5.74e-06	2.69e-05	(0, 0)	0.83	0.954194
SA_lateraloccipital	rawveg_TBSperday	IVW(MRE)	20	2.8e-06	3.61e-05	(0, 0)	0.94	0.983385
THICK_middletemporal	rawveg_TBSperday	IVW(MRE)	10	-0.0143467	0.191038	(-0.39, 0.36)	0.94	0.983385
THICK_superiorfrontal	rawveg_TBSperday	IVW(MRE)	22	-0.0116426	0.160527	(-0.33, 0.3)	0.94	0.983385
SA_entorhinal	rawveg_TBSperday	IVW(MRE)	15	1.63e-06	0.000244749	(0, 0)	0.99	0.99
SA_isthmuscingulate	rawveg_TBSperday	IVW(MRE)	20	-3.17e-06	0.000101928	(0, 0)	0.98	0.99
SA_lateralorbitofrontal	rawveg_TBSperday	IVW(MRE)	24	-1.23e-06	6.34e-05	(0, 0)	0.98	0.99
SA_insula	Sugar	IVW(MRE)	27	0.000211032	7.56969e-05	(0, 0)	0.0053	0.3604
SA_bankssts	Sugar	IVW(MRE)	17	-0.00016851	0.000139655	(0, 0)	0.23	0.6528
SA_caudalanteriorcingulate	Sugar	IVW(MRE)	14	-0.000245205	0.000155322	(0, 0)	0.11	0.6528
SA_cuneus	Sugar	IVW(MRE)	23	-0.000159013	0.000122988	(0, 0)	0.2	0.6528
SA_entorhinal	Sugar	IVW(MRE)	14	0.000216279	0.000185634	(0, 0)	0.24	0.6528
SA_frontalpole	Sugar	IVW(MRE)	10	0.000683338	0.000586639	(0, 0)	0.24	0.6528
SA_lateraloccipital	Sugar	IVW(MRE)	20	-8.50151e-05	6.19717e-05	(0, 0)	0.17	0.6528
SA_lingual	Sugar	IVW(MRE)	36	-8.7403e-05	4.17678e-05	(0, 0)	0.036	0.6528
SA_medialorbitofrontal	Sugar	IVW(MRE)	9	-0.000253384	0.000111913	(0, 0)	0.024	0.6528
SA_middletemporal	Sugar	IVW(MRE)	22	0.000119166	6.32942e-05	(0, 0)	0.06	0.6528
SA_paracentral	Sugar	IVW(MRE)	24	-0.000132179	9.39064e-05	(0, 0)	0.16	0.6528
SA_parahippocampal	Sugar	IVW(MRE)	13	-0.000269088	0.000227129	(0, 0)	0.24	0.6528
SA_temporalpole	Sugar	IVW(MRE)	14	-0.000668382	0.000387552	(0, 0)	0.08	0.6528
SA_transversetemporal	Sugar	IVW(MRE)	35	-0.000352934	0.000257525	(0, 0)	0.17	0.6528
THICK_bankssts	Sugar	IVW(MRE)	11	0.205719	0.159026	(-0.11, 0.52)	0.2	0.6528
THICK_caudalanteriorcingulate	Sugar	IVW(MRE)	9	0.232046	0.112854	(0.01, 0.45)	0.04	0.6528
THICK_cuneus	Sugar	IVW(MRE)	8	-0.546172	0.336871	(-1.21, 0.11)	0.1	0.6528
THICK_inferiorparietal	Sugar	IVW(MRE)	13	-0.24823	0.200135	(-0.64, 0.14)	0.21	0.6528
THICK_lateraloccipital	Sugar	IVW(MRE)	12	-0.194157	0.150162	(-0.49, 0.1)	0.2	0.6528
THICK_medialorbitofrontal	Sugar	IVW(MRE)	13	0.201385	0.10531	(-0.01, 0.41)	0.06	0.6528
THICK_paracentral	Sugar	IVW(MRE)	14	0.240984	0.166467	(-0.09, 0.57)	0.15	0.6528
THICK_parstriangularis	Sugar	IVW(MRE)	17	0.208991	0.151051	(-0.09, 0.51)	0.17	0.6528
THICK_pericalcarine	Sugar	IVW(MRE)	18	-0.242936	0.156979	(-0.55, 0.06)	0.12	0.6528
THICK_postcentral	Sugar	IVW(MRE)	23	0.188109	0.127091	(-0.06, 0.44)	0.14	0.6528
THICK_rostralmiddlefrontal	Sugar	IVW(MRE)	11	0.313558	0.189016	(-0.06, 0.68)	0.1	0.6528
SA_fusiform	Sugar	IVW(MRE)	19	-5.52217e-05	5.85473e-05	(0, 0)	0.35	0.661111
SA_pericalcarine	Sugar	IVW(MRE)	34	-6.9549e-05	7.07441e-05	(0, 0)	0.33	0.661111
SA_posteriorcingulate	Sugar	IVW(MRE)	22	0.000139052	0.000146055	(0, 0)	0.34	0.661111
SA_rostralmiddlefrontal	Sugar	IVW(MRE)	28	2.74749e-05	2.80975e-05	(0, 0)	0.33	0.661111
THICK_insula	Sugar	IVW(MRE)	11	0.199017	0.183061	(-0.16, 0.56)	0.28	0.661111
THICK_lingual	Sugar	IVW(MRE)	14	-0.206907	0.18964	(-0.58, 0.16)	0.28	0.661111
THICK_parsorbitalis	Sugar	IVW(MRE)	11	-0.130549	0.139227	(-0.4, 0.14)	0.35	0.661111
THICK_rostralanteriorcingulate	Sugar	IVW(MRE)	22	0.107241	0.0969634	(-0.08, 0.3)	0.27	0.661111
THICK_superiorparietal	Sugar	IVW(MRE)	15	-0.230489	0.231956	(-0.69, 0.22)	0.32	0.661111
THICK_supramarginal	Sugar	IVW(MRE)	19	-0.229697	0.232612	(-0.69, 0.23)	0.32	0.661111
THICK_temporalpole	Sugar	IVW(MRE)	6	0.140853	0.139285	(-0.13, 0.41)	0.31	0.661111
SA_parstriangularis	Sugar	IVW(MRE)	24	-7.81236e-05	8.51404e-05	(0, 0)	0.36	0.661622
THICK_entorhinal	Sugar	IVW(MRE)	9	-0.0675345	0.0761623	(-0.22, 0.08)	0.38	0.68
SA_inferiortemporal	Sugar	IVW(MRE)	21	4.58063e-05	5.79905e-05	(0, 0)	0.43	0.694783
SA_postcentral	Sugar	IVW(MRE)	20	2.87406e-05	4.00405e-05	(0, 0)	0.47	0.694783
SA_superiortemporal	Sugar	IVW(MRE)	19	-5.25861e-05	7.10017e-05	(0, 0)	0.46	0.694783
THICK_caudalmiddlefrontal	Sugar	IVW(MRE)	11	-0.249929	0.330569	(-0.9, 0.4)	0.45	0.694783
THICK_parsopercularis	Sugar	IVW(MRE)	13	0.145634	0.203077	(-0.25, 0.54)	0.47	0.694783
THICK_posteriorcingulate	Sugar	IVW(MRE)	11	0.156803	0.213629	(-0.26, 0.58)	0.46	0.694783
THICK_precentral	Sugar	IVW(MRE)	13	-0.125768	0.162184	(-0.44, 0.19)	0.44	0.694783
THICK_superiorfrontal	Sugar	IVW(MRE)	20	0.144502	0.174226	(-0.2, 0.49)	0.41	0.694783
SA_caudalmiddlefrontal	Sugar	IVW(MRE)	27	-2.99677e-05	4.83507e-05	(0, 0)	0.54	0.781277
SA_inferiorparietal	Sugar	IVW(MRE)	30	1.40849e-05	2.74021e-05	(0, 0)	0.61	0.782641
SA_isthmuscingulate	Sugar	IVW(MRE)	17	-7.99022e-05	0.000138392	(0, 0)	0.56	0.782641
SA_rostralanteriorcingulate	Sugar	IVW(MRE)	15	-8.5114e-05	0.000165879	(0, 0)	0.61	0.782641
SA_superiorfrontal	Sugar	IVW(MRE)	22	1.77808e-05	3.48534e-05	(0, 0)	0.61	0.782641
THICK_inferiortemporal	Sugar	IVW(MRE)	15	-0.0659897	0.12323	(-0.31, 0.18)	0.59	0.782641
THICK_transversetemporal	Sugar	IVW(MRE)	10	-0.0655728	0.122351	(-0.31, 0.17)	0.59	0.782641
SA_superiorparietal	Sugar	IVW(MRE)	27	-1.07925e-05	2.45307e-05	(0, 0)	0.66	0.831111
SA_parsorbitalis	Sugar	IVW(MRE)	11	-0.000147633	0.000392166	(0, 0)	0.71	0.862143
THICK_superiortemporal	Sugar	IVW(MRE)	8	-0.0705135	0.185321	(-0.43, 0.29)	0.7	0.862143
SA_precentral	Sugar	IVW(MRE)	22	9.83538e-06	3.28357e-05	(0, 0)	0.76	0.872667
THICK_isthmuscingulate	Sugar	IVW(MRE)	26	0.019817	0.0639701	(-0.11, 0.15)	0.76	0.872667
THICK_lateralorbitofrontal	Sugar	IVW(MRE)	7	-0.0586188	0.195325	(-0.44, 0.32)	0.76	0.872667
THICK_middletemporal	Sugar	IVW(MRE)	10	-0.0512639	0.172266	(-0.39, 0.29)	0.77	0.872667
SA_lateralorbitofrontal	Sugar	IVW(MRE)	22	1.35383e-05	6.4544e-05	(0, 0)	0.83	0.910323
THICK_frontalpole	Sugar	IVW(MRE)	12	0.0202285	0.087004	(-0.15, 0.19)	0.82	0.910323
SA_precuneus	Sugar	IVW(MRE)	32	-6.56549e-06	4.59257e-05	(0, 0)	0.89	0.95403
SA_supramarginal	Sugar	IVW(MRE)	21	5.07658e-06	4.90441e-05	(0, 0)	0.92	0.95403
THICK_fusiform	Sugar	IVW(MRE)	7	-0.0243811	0.30803	(-0.63, 0.58)	0.94	0.95403
THICK_parahippocampal	Sugar	IVW(MRE)	24	-0.00397518	0.0460157	(-0.09, 0.09)	0.93	0.95403
THICK_precuneus	Sugar	IVW(MRE)	20	-0.0280451	0.24008	(-0.5, 0.44)	0.91	0.95403
SA_parsopercularis	Sugar	IVW(MRE)	19	1.64422e-06	7.05688e-05	(0, 0)	0.98	0.98
SA_isthmuscingulate	tea_cupsperday	IVW(MRE)	20	-0.000323446	0.000115709	(0, 0)	0.0052	0.1768
THICK_medialorbitofrontal	tea_cupsperday	IVW(MRE)	14	-0.292752	0.10053	(-0.49, -0.1)	0.0036	0.1768
SA_fusiform	tea_cupsperday	IVW(MRE)	19	9.87e-05	3.77e-05	(0, 0)	0.0089	0.187
THICK_precentral	tea_cupsperday	IVW(MRE)	14	0.425789	0.167229	(0.1, 0.75)	0.011	0.187
SA_lateraloccipital	tea_cupsperday	IVW(MRE)	20	-0.000133017	6.55e-05	(0, 0)	0.042	0.51
THICK_caudalanteriorcingulate	tea_cupsperday	IVW(MRE)	10	0.161834	0.0808237	(0, 0.32)	0.045	0.51
THICK_entorhinal	tea_cupsperday	IVW(MRE)	9	-0.072974	0.0407195	(-0.15, 0.01)	0.07	0.528889
THICK_isthmuscingulate	tea_cupsperday	IVW(MRE)	28	-0.107622	0.0583945	(-0.22, 0.01)	0.07	0.528889
THICK_lateralorbitofrontal	tea_cupsperday	IVW(MRE)	7	0.317547	0.176814	(-0.03, 0.66)	0.07	0.528889
SA_cuneus	tea_cupsperday	IVW(MRE)	23	-0.000147014	8.31e-05	(0, 0)	0.08	0.544
SA_caudalanteriorcingulate	tea_cupsperday	IVW(MRE)	15	0.000183167	0.00015131	(0, 0)	0.23	0.7225
SA_inferiorparietal	tea_cupsperday	IVW(MRE)	31	2.06e-05	2.16e-05	(0, 0)	0.34	0.7225
SA_inferiortemporal	tea_cupsperday	IVW(MRE)	27	4.21e-05	3.3e-05	(0, 0)	0.2	0.7225
SA_lingual	tea_cupsperday	IVW(MRE)	39	-3.52e-05	3.43e-05	(0, 0)	0.31	0.7225
SA_parahippocampal	tea_cupsperday	IVW(MRE)	15	-0.000137721	0.000135985	(0, 0)	0.31	0.7225
SA_pericalcarine	tea_cupsperday	IVW(MRE)	39	-5.05e-05	4.95e-05	(0, 0)	0.31	0.7225
SA_posteriorcingulate	tea_cupsperday	IVW(MRE)	24	-0.00015345	0.000117997	(0, 0)	0.19	0.7225
SA_precentral	tea_cupsperday	IVW(MRE)	25	3.7e-05	2.58e-05	(0, 0)	0.15	0.7225
SA_rostralmiddlefrontal	tea_cupsperday	IVW(MRE)	30	-2.81e-05	2.33e-05	(0, 0)	0.23	0.7225
SA_supramarginal	tea_cupsperday	IVW(MRE)	24	-3.65e-05	3.51e-05	(0, 0)	0.3	0.7225
SA_transversetemporal	tea_cupsperday	IVW(MRE)	35	-0.00021146	0.000199259	(0, 0)	0.29	0.7225
THICK_cuneus	tea_cupsperday	IVW(MRE)	8	0.217745	0.189898	(-0.15, 0.59)	0.25	0.7225
THICK_frontalpole	tea_cupsperday	IVW(MRE)	12	-0.0636854	0.0498899	(-0.16, 0.03)	0.2	0.7225
THICK_fusiform	tea_cupsperday	IVW(MRE)	8	0.147382	0.152534	(-0.15, 0.45)	0.33	0.7225
THICK_inferiorparietal	tea_cupsperday	IVW(MRE)	13	0.266923	0.209162	(-0.14, 0.68)	0.2	0.7225
THICK_insula	tea_cupsperday	IVW(MRE)	14	-0.154411	0.159773	(-0.47, 0.16)	0.33	0.7225
THICK_lateraloccipital	tea_cupsperday	IVW(MRE)	13	0.201426	0.159371	(-0.11, 0.51)	0.21	0.7225
THICK_parsopercularis	tea_cupsperday	IVW(MRE)	16	0.116346	0.10153	(-0.08, 0.32)	0.25	0.7225
THICK_pericalcarine	tea_cupsperday	IVW(MRE)	18	-0.167388	0.131202	(-0.42, 0.09)	0.2	0.7225
THICK_superiorfrontal	tea_cupsperday	IVW(MRE)	22	0.226057	0.169642	(-0.11, 0.56)	0.18	0.7225
THICK_superiortemporal	tea_cupsperday	IVW(MRE)	11	0.291003	0.212142	(-0.12, 0.71)	0.17	0.7225
THICK_transversetemporal	tea_cupsperday	IVW(MRE)	12	-0.112507	0.116191	(-0.34, 0.12)	0.33	0.7225
SA_rostralanteriorcingulate	tea_cupsperday	IVW(MRE)	16	-0.000152986	0.000165885	(0, 0)	0.36	0.741818
SA_middletemporal	tea_cupsperday	IVW(MRE)	22	-3.78e-05	4.82e-05	(0, 0)	0.43	0.76718
THICK_caudalmiddlefrontal	tea_cupsperday	IVW(MRE)	12	0.115578	0.151179	(-0.18, 0.41)	0.44	0.76718
THICK_postcentral	tea_cupsperday	IVW(MRE)	24	-0.113715	0.148396	(-0.4, 0.18)	0.44	0.76718
THICK_posteriorcingulate	tea_cupsperday	IVW(MRE)	13	0.129389	0.150555	(-0.17, 0.42)	0.39	0.76718
THICK_precuneus	tea_cupsperday	IVW(MRE)	20	-0.116717	0.140876	(-0.39, 0.16)	0.41	0.76718
THICK_supramarginal	tea_cupsperday	IVW(MRE)	20	-0.130791	0.168811	(-0.46, 0.2)	0.44	0.76718
SA_parsorbitalis	tea_cupsperday	IVW(MRE)	12	0.00016264	0.000232338	(0, 0)	0.48	0.816
SA_precuneus	tea_cupsperday	IVW(MRE)	31	-1.96e-05	3.04e-05	(0, 0)	0.52	0.822326
SA_superiortemporal	tea_cupsperday	IVW(MRE)	22	3.24e-05	4.86e-05	(0, 0)	0.51	0.822326
THICK_lingual	tea_cupsperday	IVW(MRE)	14	0.150255	0.22215	(-0.29, 0.59)	0.5	0.822326
SA_frontalpole	tea_cupsperday	IVW(MRE)	11	-0.00032678	0.000621896	(0, 0)	0.6	0.8296
SA_parstriangularis	tea_cupsperday	IVW(MRE)	27	3.45e-05	5.82e-05	(0, 0)	0.55	0.8296
SA_superiorparietal	tea_cupsperday	IVW(MRE)	28	-1.42e-05	2.35e-05	(0, 0)	0.55	0.8296
THICK_bankssts	tea_cupsperday	IVW(MRE)	12	-0.0702097	0.131321	(-0.33, 0.19)	0.59	0.8296
THICK_inferiortemporal	tea_cupsperday	IVW(MRE)	18	0.082401	0.145119	(-0.2, 0.37)	0.57	0.8296
THICK_parahippocampal	tea_cupsperday	IVW(MRE)	26	-0.0243288	0.0470447	(-0.12, 0.07)	0.61	0.8296
THICK_parsorbitalis	tea_cupsperday	IVW(MRE)	12	-0.0688283	0.132401	(-0.33, 0.19)	0.6	0.8296
SA_insula	tea_cupsperday	IVW(MRE)	29	3.32e-05	6.82e-05	(0, 0)	0.63	0.84
SA_medialorbitofrontal	tea_cupsperday	IVW(MRE)	10	-7.7e-05	0.000168515	(0, 0)	0.65	0.85
SA_parsopercularis	tea_cupsperday	IVW(MRE)	20	2.48e-05	6.06e-05	(0, 0)	0.68	0.872453
SA_paracentral	tea_cupsperday	IVW(MRE)	26	3.06e-05	8.79e-05	(0, 0)	0.73	0.919259
SA_temporalpole	tea_cupsperday	IVW(MRE)	15	-7.81e-05	0.000248857	(0, 0)	0.75	0.927273
SA_bankssts	tea_cupsperday	IVW(MRE)	19	-3.47e-05	0.00017084	(0, 0)	0.84	0.945625
SA_entorhinal	tea_cupsperday	IVW(MRE)	15	2.44e-05	0.000180589	(0, 0)	0.89	0.945625
SA_lateralorbitofrontal	tea_cupsperday	IVW(MRE)	24	2.28e-05	8.24e-05	(0, 0)	0.78	0.945625
SA_postcentral	tea_cupsperday	IVW(MRE)	21	-1.15e-05	4.89e-05	(0, 0)	0.81	0.945625
SA_superiorfrontal	tea_cupsperday	IVW(MRE)	23	4.66e-06	3.33e-05	(0, 0)	0.89	0.945625
THICK_paracentral	tea_cupsperday	IVW(MRE)	14	-0.0320935	0.193179	(-0.41, 0.35)	0.87	0.945625
THICK_rostralanteriorcingulate	tea_cupsperday	IVW(MRE)	23	-0.0130234	0.0573594	(-0.13, 0.1)	0.82	0.945625
THICK_rostralmiddlefrontal	tea_cupsperday	IVW(MRE)	14	-0.0287739	0.136861	(-0.3, 0.24)	0.83	0.945625
THICK_superiorparietal	tea_cupsperday	IVW(MRE)	14	0.0193312	0.144095	(-0.26, 0.3)	0.89	0.945625
SA_caudalmiddlefrontal	tea_cupsperday	IVW(MRE)	28	-1.26e-06	3.72e-05	(0, 0)	0.97	0.984478
THICK_middletemporal	tea_cupsperday	IVW(MRE)	10	0.0110146	0.161438	(-0.31, 0.33)	0.95	0.984478
THICK_parstriangularis	tea_cupsperday	IVW(MRE)	18	-0.00356676	0.0718827	(-0.14, 0.14)	0.96	0.984478
THICK_temporalpole	tea_cupsperday	IVW(MRE)	6	-0.000321272	0.0512477	(-0.1, 0.1)	0.99	0.99
SA_posteriorcingulate	water_glassesperday	IVW(MRE)	24	0.000255263	0.000106737	(0, 0)	0.017	0.578
THICK_fusiform	water_glassesperday	IVW(MRE)	8	0.351468	0.137481	(0.08, 0.62)	0.011	0.578
SA_superiortemporal	water_glassesperday	IVW(MRE)	22	-0.000124693	6.27e-05	(0, 0)	0.047	0.6392
THICK_frontalpole	water_glassesperday	IVW(MRE)	12	0.0913349	0.0445717	(0, 0.18)	0.04	0.6392
THICK_inferiorparietal	water_glassesperday	IVW(MRE)	13	-0.302079	0.14644	(-0.59, -0.02)	0.039	0.6392
SA_caudalanteriorcingulate	water_glassesperday	IVW(MRE)	15	0.000203314	0.00016118	(0, 0)	0.21	0.816
SA_caudalmiddlefrontal	water_glassesperday	IVW(MRE)	28	-4.3e-05	4.18e-05	(0, 0)	0.3	0.816
SA_cuneus	water_glassesperday	IVW(MRE)	23	-7.99e-05	7.31e-05	(0, 0)	0.27	0.816
SA_frontalpole	water_glassesperday	IVW(MRE)	11	0.00070763	0.00045719	(0, 0)	0.12	0.816
SA_fusiform	water_glassesperday	IVW(MRE)	19	-0.000139479	7.97e-05	(0, 0)	0.08	0.816
SA_inferiortemporal	water_glassesperday	IVW(MRE)	27	3.11e-05	2.77e-05	(0, 0)	0.26	0.816
SA_isthmuscingulate	water_glassesperday	IVW(MRE)	20	0.000116599	0.000104332	(0, 0)	0.26	0.816
SA_lingual	water_glassesperday	IVW(MRE)	39	-5.16e-05	3.64e-05	(0, 0)	0.16	0.816
SA_medialorbitofrontal	water_glassesperday	IVW(MRE)	10	0.000226124	0.000168795	(0, 0)	0.18	0.816
SA_parstriangularis	water_glassesperday	IVW(MRE)	27	-5.04e-05	5.04e-05	(0, 0)	0.32	0.816
SA_precentral	water_glassesperday	IVW(MRE)	25	-4.08e-05	2.77e-05	(0, 0)	0.14	0.816
SA_precuneus	water_glassesperday	IVW(MRE)	31	4.1e-05	4.19e-05	(0, 0)	0.33	0.816
SA_supramarginal	water_glassesperday	IVW(MRE)	24	5.68e-05	3.43e-05	(0, 0)	0.1	0.816
SA_transversetemporal	water_glassesperday	IVW(MRE)	35	-0.000158901	0.000169902	(0, 0)	0.35	0.816
THICK_caudalanteriorcingulate	water_glassesperday	IVW(MRE)	10	-0.124036	0.114584	(-0.35, 0.1)	0.28	0.816
THICK_caudalmiddlefrontal	water_glassesperday	IVW(MRE)	12	-0.15791	0.167815	(-0.49, 0.17)	0.35	0.816
THICK_cuneus	water_glassesperday	IVW(MRE)	8	-0.212233	0.20577	(-0.62, 0.19)	0.3	0.816
THICK_inferiortemporal	water_glassesperday	IVW(MRE)	18	0.291546	0.173907	(-0.05, 0.63)	0.09	0.816
THICK_insula	water_glassesperday	IVW(MRE)	14	0.161017	0.107339	(-0.05, 0.37)	0.13	0.816
THICK_isthmuscingulate	water_glassesperday	IVW(MRE)	28	-0.0753112	0.0795121	(-0.23, 0.08)	0.34	0.816
THICK_paracentral	water_glassesperday	IVW(MRE)	14	-0.145319	0.136548	(-0.41, 0.12)	0.29	0.816
THICK_parstriangularis	water_glassesperday	IVW(MRE)	18	0.15976	0.135025	(-0.1, 0.42)	0.24	0.816
THICK_pericalcarine	water_glassesperday	IVW(MRE)	18	0.125656	0.121624	(-0.11, 0.36)	0.3	0.816
THICK_postcentral	water_glassesperday	IVW(MRE)	24	-0.119118	0.130015	(-0.37, 0.14)	0.36	0.816
THICK_rostralanteriorcingulate	water_glassesperday	IVW(MRE)	23	0.057477	0.0599148	(-0.06, 0.17)	0.34	0.816
SA_middletemporal	water_glassesperday	IVW(MRE)	22	3.46e-05	5.25e-05	(0, 0)	0.51	0.89561
SA_parahippocampal	water_glassesperday	IVW(MRE)	15	-9.51e-05	0.000139215	(0, 0)	0.49	0.89561
SA_superiorparietal	water_glassesperday	IVW(MRE)	28	1.82e-05	2.66e-05	(0, 0)	0.49	0.89561
THICK_entorhinal	water_glassesperday	IVW(MRE)	9	-0.0453647	0.0565429	(-0.16, 0.07)	0.42	0.89561
THICK_lateraloccipital	water_glassesperday	IVW(MRE)	13	0.142993	0.226871	(-0.3, 0.59)	0.53	0.89561
THICK_lingual	water_glassesperday	IVW(MRE)	14	0.157115	0.205276	(-0.25, 0.56)	0.44	0.89561
THICK_parahippocampal	water_glassesperday	IVW(MRE)	26	0.0242801	0.0387357	(-0.05, 0.1)	0.53	0.89561
THICK_posteriorcingulate	water_glassesperday	IVW(MRE)	13	-0.0531018	0.0856802	(-0.22, 0.11)	0.54	0.89561
THICK_precentral	water_glassesperday	IVW(MRE)	14	0.155256	0.249581	(-0.33, 0.64)	0.53	0.89561
THICK_temporalpole	water_glassesperday	IVW(MRE)	6	0.0440447	0.0631983	(-0.08, 0.17)	0.49	0.89561
THICK_transversetemporal	water_glassesperday	IVW(MRE)	12	-0.0578263	0.0927777	(-0.24, 0.12)	0.53	0.89561
THICK_bankssts	water_glassesperday	IVW(MRE)	12	0.101096	0.175016	(-0.24, 0.44)	0.56	0.906667
SA_parsorbitalis	water_glassesperday	IVW(MRE)	12	0.000110123	0.000222772	(0, 0)	0.62	0.967111
THICK_middletemporal	water_glassesperday	IVW(MRE)	10	0.0800467	0.169041	(-0.25, 0.41)	0.64	0.967111
THICK_superiortemporal	water_glassesperday	IVW(MRE)	11	-0.0792047	0.163179	(-0.4, 0.24)	0.63	0.967111
SA_bankssts	water_glassesperday	IVW(MRE)	19	1.24e-05	0.000184825	(0, 0)	0.95	0.98
SA_entorhinal	water_glassesperday	IVW(MRE)	15	-1.05e-05	0.000213124	(0, 0)	0.96	0.98
SA_inferiorparietal	water_glassesperday	IVW(MRE)	31	-4.79e-06	2.2e-05	(0, 0)	0.83	0.98
SA_insula	water_glassesperday	IVW(MRE)	29	2.43e-05	6.92e-05	(0, 0)	0.73	0.98
SA_lateraloccipital	water_glassesperday	IVW(MRE)	20	-2.07e-05	6.7e-05	(0, 0)	0.76	0.98
SA_lateralorbitofrontal	water_glassesperday	IVW(MRE)	24	-4.62e-06	6.2e-05	(0, 0)	0.94	0.98
SA_paracentral	water_glassesperday	IVW(MRE)	26	-7.25e-06	9.29e-05	(0, 0)	0.94	0.98
SA_parsopercularis	water_glassesperday	IVW(MRE)	20	8.47e-06	9.3e-05	(0, 0)	0.93	0.98
SA_pericalcarine	water_glassesperday	IVW(MRE)	39	-1.67e-05	5.79e-05	(0, 0)	0.77	0.98
SA_postcentral	water_glassesperday	IVW(MRE)	21	1.08e-05	4.66e-05	(0, 0)	0.82	0.98
SA_rostralanteriorcingulate	water_glassesperday	IVW(MRE)	16	5.74e-05	0.000198281	(0, 0)	0.77	0.98
SA_rostralmiddlefrontal	water_glassesperday	IVW(MRE)	30	3.1e-06	3.09e-05	(0, 0)	0.92	0.98
SA_superiorfrontal	water_glassesperday	IVW(MRE)	23	1.35e-05	3.16e-05	(0, 0)	0.67	0.98
SA_temporalpole	water_glassesperday	IVW(MRE)	15	1.5e-05	0.000349156	(0, 0)	0.97	0.98
THICK_lateralorbitofrontal	water_glassesperday	IVW(MRE)	7	0.039549	0.148708	(-0.25, 0.33)	0.79	0.98
THICK_medialorbitofrontal	water_glassesperday	IVW(MRE)	14	-0.00263615	0.0894695	(-0.18, 0.17)	0.98	0.98
THICK_parsopercularis	water_glassesperday	IVW(MRE)	16	0.00508582	0.143475	(-0.28, 0.29)	0.97	0.98
THICK_parsorbitalis	water_glassesperday	IVW(MRE)	12	0.0180869	0.102983	(-0.18, 0.22)	0.86	0.98
THICK_precuneus	water_glassesperday	IVW(MRE)	20	0.0127504	0.202514	(-0.38, 0.41)	0.95	0.98
THICK_rostralmiddlefrontal	water_glassesperday	IVW(MRE)	14	-0.00434517	0.135603	(-0.27, 0.26)	0.97	0.98
THICK_superiorfrontal	water_glassesperday	IVW(MRE)	22	0.0229469	0.160555	(-0.29, 0.34)	0.89	0.98
THICK_superiorparietal	water_glassesperday	IVW(MRE)	14	0.0769307	0.249012	(-0.41, 0.56)	0.76	0.98
THICK_supramarginal	water_glassesperday	IVW(MRE)	20	-0.0351646	0.18816	(-0.4, 0.33)	0.85	0.98

## Sheet: Global(BH)
Supplementary Table 5.1 result of MR estimates for the association between the global cortex and food type.(with Benjamini-Hochberg)
exposure	outcome	method	nSNP	beta	se	95%CI	pvalue	P(BH)
Full_SurfArea	Carbohydrate	IVW(MRE)	35	3.02964e-07	8.65903e-07	(0, 0)	0.73	0.79
Full_SurfArea	Fat	IVW(MRE)	35	-1.13539e-06	8.02369e-07	(0, 0)	0.16	0.32
Full_SurfArea	Protein	IVW(MRE)	35	1.81797e-07	6.88753e-07	(0, 0)	0.79	0.79
Full_SurfArea	Sugar	IVW(MRE)	35	1.39625e-06	8.57933e-07	(0, 0)	0.1	0.32
Full_Thickness	Carbohydrate	IVW(MRE)	24	0.0474353	0.158962	(-0.26, 0.36)	0.77	0.98
Full_Thickness	Fat	IVW(MRE)	24	0.168066	0.160256	(-0.15, 0.48)	0.29	0.64
Full_Thickness	Protein	IVW(MRE)	24	-0.00386159	0.140222	(-0.28, 0.27)	0.98	0.98
Full_Thickness	Sugar	IVW(MRE)	24	0.135632	0.13614	(-0.13, 0.4)	0.32	0.64
Full_SurfArea	alcohol_overallfreq	IVW(MRE)	6	5.52327e-06	1.85668e-06	(0, 0)	0.0029	0.0551
Full_SurfArea	anyalcohol_glassespermonth	IVW(MRE)	6	5.99727e-06	2.62735e-06	(0, 0)	0.022	0.152
Full_SurfArea	beef_overallfreq	IVW(MRE)	6	-1.04883e-07	1.16523e-06	(0, 0)	0.93	0.99
Full_SurfArea	cereal_bowlsperweek	IVW(MRE)	6	-1.79003e-06	1.87609e-06	(0, 0)	0.34	0.988
Full_SurfArea	cheese_overallfreq	IVW(MRE)	6	1.70098e-06	2.27439e-06	(0, 0)	0.45	0.988
Full_SurfArea	coffee_cupsperday	IVW(MRE)	6	6.71358e-07	2.35373e-06	(0, 0)	0.78	0.988
Full_SurfArea	cookedveg_TBSperday	IVW(MRE)	6	8.95659e-07	1.62478e-06	(0, 0)	0.58	0.988
Full_SurfArea	doyouaddsalt	IVW(MRE)	6	-1.13794e-06	1.75852e-06	(0, 0)	0.52	0.988
Full_SurfArea	freshfruit_piecesperday	IVW(MRE)	6	1.30423e-06	3.26347e-06	(0, 0)	0.69	0.988
Full_SurfArea	hotdrinktemp	IVW(MRE)	6	6.3386e-08	1.85946e-06	(0, 0)	0.97	0.99
Full_SurfArea	lambmutton_overallfreq	IVW(MRE)	6	2.74431e-06	1.60735e-06	(0, 0)	0.09	0.342
Full_SurfArea	milk_typeused_bin5	IVW(MRE)	6	1.88728e-07	9.82999e-07	(0, 0)	0.85	0.99
Full_SurfArea	milk_typeused_bin9	IVW(MRE)	6	-9.04141e-07	1.13889e-06	(0, 0)	0.43	0.988
Full_SurfArea	nonoilyfish_overallfreq	IVW(MRE)	6	-5.85809e-07	1.89067e-06	(0, 0)	0.76	0.988
Full_SurfArea	oilyfish_overallfreq	IVW(MRE)	6	5.82971e-06	2.57707e-06	(0, 0)	0.024	0.152
Full_SurfArea	pork_overallfreq	IVW(MRE)	6	2.1094e-08	1.59684e-06	(0, 0)	0.99	0.99
Full_SurfArea	rawveg_TBSperday	IVW(MRE)	6	3.9805e-06	2.2919e-06	(0, 0)	0.08	0.342
Full_SurfArea	tea_cupsperday	IVW(MRE)	6	5.99386e-07	8.87607e-07	(0, 0)	0.5	0.988
Full_SurfArea	water_glassesperday	IVW(MRE)	6	-8.48439e-07	2.88258e-06	(0, 0)	0.77	0.988
Full_Thickness	alcohol_overallfreq	IVW(MRE)	29	-0.293979	0.166636	(-0.62, 0.03)	0.08	0.475
Full_Thickness	anyalcohol_glassespermonth	IVW(MRE)	29	-0.408865	0.194116	(-0.79, -0.03)	0.035	0.475
Full_Thickness	beef_overallfreq	IVW(MRE)	29	-0.0999962	0.127503	(-0.35, 0.15)	0.43	0.628462
Full_Thickness	cereal_bowlsperweek	IVW(MRE)	29	0.0467101	0.120542	(-0.19, 0.28)	0.7	0.83125
Full_Thickness	cheese_overallfreq	IVW(MRE)	29	0.15317	0.1243	(-0.09, 0.4)	0.22	0.475
Full_Thickness	coffee_cupsperday	IVW(MRE)	29	-0.0819839	0.120396	(-0.32, 0.15)	0.5	0.678571
Full_Thickness	cookedveg_TBSperday	IVW(MRE)	29	-0.0256612	0.128403	(-0.28, 0.23)	0.84	0.886667
Full_Thickness	doyouaddsalt	IVW(MRE)	29	-0.128176	0.120654	(-0.36, 0.11)	0.29	0.475
Full_Thickness	freshfruit_piecesperday	IVW(MRE)	29	0.165013	0.124804	(-0.08, 0.41)	0.19	0.475
Full_Thickness	hotdrinktemp	IVW(MRE)	29	-0.155194	0.128592	(-0.41, 0.1)	0.23	0.475
Full_Thickness	lambmutton_overallfreq	IVW(MRE)	29	-0.171027	0.163899	(-0.49, 0.15)	0.3	0.475
Full_Thickness	milk_typeused_bin5	IVW(MRE)	29	-0.0146321	0.0662796	(-0.14, 0.12)	0.83	0.886667
Full_Thickness	milk_typeused_bin9	IVW(MRE)	29	0.0594639	0.111455	(-0.16, 0.28)	0.59	0.747333
Full_Thickness	nonoilyfish_overallfreq	IVW(MRE)	29	-0.128477	0.0942068	(-0.31, 0.06)	0.17	0.475
Full_Thickness	oilyfish_overallfreq	IVW(MRE)	29	-0.161729	0.128623	(-0.41, 0.09)	0.21	0.475
Full_Thickness	pork_overallfreq	IVW(MRE)	29	-0.142038	0.117382	(-0.37, 0.09)	0.23	0.475
Full_Thickness	rawveg_TBSperday	IVW(MRE)	29	-0.171588	0.147665	(-0.46, 0.12)	0.25	0.475
Full_Thickness	tea_cupsperday	IVW(MRE)	29	0.00670241	0.125201	(-0.24, 0.25)	0.96	0.96
Full_Thickness	water_glassesperday	IVW(MRE)	29	0.201454	0.160425	(-0.11, 0.52)	0.21	0.475
