# Supplementary material for: Unveiling the influence of daily dietary patterns on brain cortical structure: insights from bidirectional Mendelian randomization
Source: Royal Society of Chemistry journal article supplement (doi:10.1039/d3fo02879h), 2023-01-01
Supplement: d3fo02879h6.xlsx [file d3fo02879h6.xlsx]

## Sheet: Cortical regions
Supplementary Table . GWAS summary data of cortical regions at P-value<5.0×10-6
Cortical regions	rsID	effect_allele	oTher_Allele	Beta	SE	P-value	N
SA_bankssts	rs115074637	A	G	14.7849	3.1392	2.481e-06	21268
SA_bankssts	rs116787600	T	C	14.8092	3.1816	3.247e-06	21268
SA_bankssts	rs79377694	A	T	-14.5612	3.1687	4.322e-06	21268
SA_bankssts	rs75693815	T	G	14.8253	3.1807	3.146e-06	21268
SA_bankssts	rs78339077	A	T	14.5432	3.1529	3.977e-06	21268
SA_bankssts	rs116372127	T	C	14.3392	3.1374	4.867e-06	21423
SA_bankssts	rs682180	T	C	11.3595	2.401	2.232e-06	21787
SA_bankssts	rs680343	T	C	-11.3989	2.3983	2.005e-06	21787
SA_bankssts	rs2764421	A	G	11.3528	2.3991	2.223e-06	21787
SA_bankssts	rs2453414	A	G	-11.1188	2.392	3.345e-06	21787
SA_bankssts	rs2066297	T	C	11.1288	2.4142	4.034e-06	21409
SA_bankssts	rs12631240	A	G	-5.3837	1.1613	3.555e-06	21427
SA_bankssts	rs4631085	T	C	-5.3125	1.157	4.397e-06	21805
SA_bankssts	rs13122073	C	G	5.3358	1.1654	4.686e-06	21805
SA_bankssts	rs13112241	A	G	6.0291	1.2218	8.031e-07	21805
SA_bankssts	rs17048895	T	C	-9.8995	2.0574	1.496e-06	21805
SA_bankssts	rs72715516	A	G	-17.7323	3.8518	4.151e-06	14865
SA_bankssts	rs12544456	A	T	5.1653	1.114	3.538e-06	21805
SA_bankssts	rs10112022	A	C	6.2699	1.3007	1.433e-06	21805
SA_bankssts	rs28641470	T	C	6.3098	1.307	1.382e-06	21805
SA_bankssts	rs7862092	T	G	10.0477	1.8639	7.014e-08	21805
SA_bankssts	rs12003640	A	G	9.0469	1.8548	1.074e-06	21805
SA_bankssts	rs113464890	T	C	-8.9957	1.8552	1.242e-06	21805
SA_bankssts	rs61048229	A	C	-8.9612	1.8555	1.368e-06	21805
SA_bankssts	rs7029033	T	C	-8.9512	1.8554	1.404e-06	21805
SA_bankssts	rs7032412	A	C	8.948	1.8505	1.328e-06	21805
SA_bankssts	rs78046250	A	G	8.9412	1.8553	1.44e-06	21805
SA_bankssts	rs76340496	T	C	8.9167	1.8505	1.446e-06	21805
SA_bankssts	rs80056780	A	G	-8.8444	1.8199	1.174e-06	21805
SA_bankssts	rs56015757	A	C	8.8197	1.852	1.915e-06	21805
SA_bankssts	rs59162562	A	C	-8.9016	1.855	1.598e-06	21805
SA_bankssts	rs12115299	C	G	8.8302	1.8486	1.783e-06	21805
SA_bankssts	rs9422952	T	G	10.2542	2.2386	4.638e-06	22169
SA_bankssts	rs28433808	C	G	-10.3656	2.2457	3.915e-06	22169
SA_bankssts	rs682780	A	G	13.7359	2.8896	1.998e-06	20894
SA_bankssts	rs593537	T	G	14.4706	3.019	1.641e-06	20051
SA_bankssts	rs2809603	T	C	5.8088	1.2446	3.053e-06	21805
SA_bankssts	rs8012185	A	G	5.2832	1.1447	3.928e-06	21613
SA_bankssts	rs10483697	A	T	-5.2992	1.1446	3.663e-06	21613
SA_bankssts	rs11623859	A	G	-5.2812	1.1438	3.885e-06	21613
SA_bankssts	rs11623828	A	G	5.2769	1.1437	3.948e-06	21613
SA_bankssts	rs11628520	T	G	5.2955	1.1435	3.636e-06	21613
SA_bankssts	rs1212694	A	G	-5.3156	1.1424	3.274e-06	21613
SA_bankssts	rs6573192	A	G	-5.3688	1.1497	3.018e-06	21613
SA_bankssts	rs7157304	A	G	5.3112	1.1424	3.332e-06	21613
SA_bankssts	rs61975946	A	G	-5.3366	1.1416	2.945e-06	21613
SA_bankssts	14:58687081:A_ATG	i	r	5.3409	1.1481	3.287e-06	21235
SA_bankssts	rs10141464	A	T	5.2664	1.137	3.627e-06	21613
SA_bankssts	rs4035222	A	G	-5.3159	1.1425	3.274e-06	21613
SA_bankssts	rs111932447	i	r	5.2103	1.106	2.463e-06	21235
SA_bankssts	14:58697797:G_GAA	i	r	6.098	1.1781	2.266e-07	19427
SA_bankssts	rs28411823	T	C	5.4389	1.1278	1.417e-06	21613
SA_bankssts	rs11851552	T	C	5.4221	1.1292	1.574e-06	21613
SA_bankssts	rs12879675	A	G	5.3934	1.1301	1.819e-06	21613
SA_bankssts	rs200174329	d	r	5.2574	1.138	3.842e-06	21235
SA_bankssts	rs6573194	T	C	4.901	1.0385	2.368e-06	21613
SA_bankssts	rs6573197	T	C	5.1567	1.1291	4.951e-06	21613
SA_bankssts	14:58724814:A_ACT	i	r	5.7434	1.1838	1.225e-06	19427
SA_bankssts	rs35486640	i	r	5.7436	1.1838	1.224e-06	19427
SA_bankssts	rs12892257	A	G	4.7925	1.0365	3.771e-06	21613
SA_bankssts	rs1885133	T	C	5.1821	1.1275	4.306e-06	21613
SA_bankssts	rs1885134	A	T	5.1982	1.1267	3.959e-06	21613
SA_bankssts	rs8005100	A	T	-5.3309	1.1324	2.505e-06	21613
SA_bankssts	rs2180871	A	G	5.2015	1.1265	3.887e-06	21613
SA_bankssts	rs12590259	A	C	4.9876	1.0457	1.846e-06	21235
SA_bankssts	14:58742317:T_TAC	i	r	5.6917	1.2211	3.147e-06	19427
SA_bankssts	rs2348072	A	G	5.1826	1.1271	4.265e-06	21613
SA_bankssts	rs10151752	A	G	-4.9279	1.0331	1.841e-06	21805
SA_bankssts	rs10151828	T	C	5.1802	1.1267	4.275e-06	21613
SA_bankssts	rs7147757	C	G	4.8598	1.0299	2.376e-06	21805
SA_bankssts	14:58757976:C_CG	i	r	5.4329	1.1803	4.169e-06	19427
SA_bankssts	14:58758331:G_GT	i	r	5.1837	1.1278	4.303e-06	21427
SA_bankssts	rs10132929	A	T	5.2299	1.1272	3.486e-06	21427
SA_bankssts	rs7146801	T	C	5.1081	1.1181	4.915e-06	21805
SA_bankssts	rs7147470	A	G	5.1288	1.1176	4.449e-06	21805
SA_bankssts	14:58759705_TGA_T	d	r	5.2083	1.1293	3.99e-06	21427
SA_bankssts	14:58759709:AG_A	d	r	5.6613	1.2191	3.422e-06	19427
SA_bankssts	rs7153897	C	G	-5.2256	1.1252	3.415e-06	21805
SA_bankssts	rs7154212	A	G	5.2643	1.1238	2.809e-06	21805
SA_bankssts	rs7154076	T	C	5.276	1.1309	3.083e-06	21805
SA_bankssts	rs28637941	A	C	4.929	1.0312	1.755e-06	21805
SA_bankssts	rs7154498	C	G	-5.2049	1.1245	3.685e-06	21805
SA_bankssts	rs7155825	T	C	-5.2051	1.1245	3.681e-06	21805
SA_bankssts	rs4520767	A	G	5.1165	1.1193	4.845e-06	21805
SA_bankssts	rs4520768	A	G	5.1307	1.1195	4.582e-06	21805
SA_bankssts	rs4638492	A	G	5.1792	1.1251	4.155e-06	21805
SA_bankssts	14:58774719:C_CAC	i	r	5.759	1.1813	1.086e-06	19427
SA_bankssts	14:58774720:A_AC	i	r	5.563	1.2072	4.061e-06	19427
SA_bankssts	rs8005422	A	G	-4.8562	1.0609	4.711e-06	21805
SA_bankssts	rs1190980	T	C	4.923	1.0253	1.573e-06	21805
SA_bankssts	rs1190981	C	G	-4.8703	1.0262	2.077e-06	21805
SA_bankssts	rs1190982	T	C	-5.042	1.0928	3.949e-06	21805
SA_bankssts	rs4901852	A	G	4.9337	1.0232	1.423e-06	21805
SA_bankssts	rs7151036	A	G	-4.9172	1.0234	1.55e-06	21805
SA_bankssts	rs183400	T	C	5.3902	1.0386	2.102e-07	21805
SA_bankssts	rs170239	T	C	5.9622	1.0312	7.383e-09	21805
SA_bankssts	rs221325	T	G	-5.2094	1.0223	3.469e-07	21805
SA_bankssts	rs468167	T	C	-5.2333	1.0243	3.233e-07	21805
SA_bankssts	rs221326	T	G	5.784	1.0182	1.343e-08	21805
SA_bankssts	rs149142	T	C	-5.7544	1.0343	2.642e-08	21805
SA_bankssts	rs10782438	T	C	-5.66	1.0164	2.569e-08	21805
SA_bankssts	rs186347	T	G	6.0911	1.0131	1.825e-09	21805
SA_bankssts	rs160460	A	G	-6.2226	1.0251	1.275e-09	21805
SA_bankssts	rs160459	A	C	-6.1608	1.0139	1.23e-09	21805
SA_bankssts	rs160458	T	C	-6.1823	1.0221	1.463e-09	21805
SA_bankssts	rs4898962	T	C	-4.808	1.0051	1.722e-06	21805
SA_bankssts	rs311815	T	C	-4.9494	1.0073	8.951e-07	21805
SA_bankssts	rs311814	T	C	4.9042	1.0073	1.124e-06	21805
SA_bankssts	rs311813	A	G	4.9729	1.008	8.079e-07	21805
SA_bankssts	rs1742882	A	G	5.0256	1.0074	6.081e-07	21805
SA_bankssts	rs191103	T	C	-5.3108	1.0101	1.459e-07	21805
SA_bankssts	rs34898843	A	G	-5.9651	1.2396	1.495e-06	21805
SA_bankssts	rs34109793	T	C	5.7448	1.2467	4.068e-06	21805
SA_bankssts	14:59632109:GAAC_	d	r	-7.6839	1.3672	1.906e-08	19427
SA_bankssts	rs4497651	A	G	-5.3856	1.1684	4.038e-06	21276
SA_bankssts	rs12101308	A	C	-5.6998	1.2433	4.551e-06	21805
SA_bankssts	rs2303242	T	C	-5.0484	1.0189	7.234e-07	21805
SA_bankssts	rs62075215	T	C	-5.4851	1.1605	2.284e-06	21194
SA_bankssts	rs12950705	A	G	-5.4806	1.1592	2.266e-06	21194
SA_bankssts	rs12944520	T	C	-5.4698	1.1562	2.235e-06	21194
SA_bankssts	rs8072921	A	G	-5.5359	1.1585	1.766e-06	21194
SA_bankssts	rs12936913	T	C	-5.3734	1.1415	2.509e-06	21650
SA_bankssts	rs12938090	A	C	-5.4947	1.1548	1.954e-06	21650
SA_bankssts	rs68175985	A	G	7.3937	1.5687	2.44e-06	19080
SA_bankssts	rs73006822	T	C	8.1006	1.6091	4.799e-07	19080
SA_bankssts	19:13123750_AG_A	d	r	8.1459	1.6207	5.002e-07	18702
SA_bankssts	rs73006837	T	C	7.7114	1.5375	5.286e-07	19545
SA_bankssts	rs4809199	T	G	7.0885	1.348	1.451e-07	18982
SA_bankssts	rs11085957	A	G	6.8013	1.3465	4.394e-07	18982
SA_caudalanteriorcingulate	rs7413250	A	T	-6.0301	1.2768	2.328e-06	22416
SA_caudalanteriorcingulate	rs11211582	T	C	5.9077	1.2475	2.182e-06	22416
SA_caudalanteriorcingulate	rs61780049	A	G	-6.0043	1.2576	1.801e-06	22416
SA_caudalanteriorcingulate	rs6675870	T	C	-6.0229	1.254	1.563e-06	22416
SA_caudalanteriorcingulate	rs9439093	C	G	5.4654	1.1688	2.925e-06	22416
SA_caudalanteriorcingulate	rs3795318	A	G	-4.7453	1.021	3.356e-06	22776
SA_caudalanteriorcingulate	rs12045189	A	G	4.8412	1.0368	3.022e-06	22393
SA_caudalanteriorcingulate	rs12120047	T	C	-4.7988	1.028	3.043e-06	22776
SA_caudalanteriorcingulate	rs720233	T	G	-4.8096	1.0276	2.862e-06	22776
SA_caudalanteriorcingulate	rs11209428	A	T	-4.7443	1.0363	4.689e-06	22776
SA_caudalanteriorcingulate	rs59515109	T	C	4.8006	1.0303	3.174e-06	22776
SA_caudalanteriorcingulate	rs59251823	A	C	-4.7328	1.0328	4.593e-06	22776
SA_caudalanteriorcingulate	rs10889811	T	C	-4.7075	1.0307	4.937e-06	22776
SA_caudalanteriorcingulate	rs10789284	A	G	-4.7267	1.0313	4.582e-06	22776
SA_caudalanteriorcingulate	rs1380669	A	G	4.7104	1.0317	4.983e-06	22776
SA_caudalanteriorcingulate	rs10157261	A	G	4.7686	1.0417	4.701e-06	22776
SA_caudalanteriorcingulate	rs114059697	T	C	20.1763	4.3973	4.468e-06	18485
SA_caudalanteriorcingulate	rs180902978	A	G	20.3929	4.3972	3.524e-06	18485
SA_caudalanteriorcingulate	rs115385762	T	C	20.5081	4.3734	2.741e-06	18485
SA_caudalanteriorcingulate	rs78007593	A	C	-19.3889	4.1386	2.802e-06	20329
SA_caudalanteriorcingulate	1:146534349_CAT_C	d	r	5.2805	1.1407	3.671e-06	22201
SA_caudalanteriorcingulate	rs61838920	A	G	-5.2661	1.1441	4.168e-06	22393
SA_caudalanteriorcingulate	rs6427865	A	G	10.1169	1.984	3.408e-07	23185
SA_caudalanteriorcingulate	rs12096763	A	C	10.2037	1.9854	2.758e-07	23185
SA_caudalanteriorcingulate	rs10920072	A	C	8.9166	1.9529	4.974e-06	23185
SA_caudalanteriorcingulate	rs75761779	T	G	-12.8938	2.8079	4.39e-06	22493
SA_caudalanteriorcingulate	rs12474587	T	G	4.1588	0.8971	3.553e-06	22776
SA_caudalanteriorcingulate	rs7604885	A	G	4.118	0.8876	3.492e-06	22776
SA_caudalanteriorcingulate	rs6707646	T	C	4.2317	0.883	1.649e-06	22776
SA_caudalanteriorcingulate	rs7580486	T	G	-4.1629	0.8841	2.492e-06	22776
SA_caudalanteriorcingulate	rs12472555	T	G	-4.2774	0.8858	1.375e-06	22776
SA_caudalanteriorcingulate	rs4572609	C	G	-4.3246	0.9358	3.815e-06	22776
SA_caudalanteriorcingulate	rs4500960	T	C	4.1924	0.88	1.897e-06	22776
SA_caudalanteriorcingulate	rs4233647	A	G	4.059	0.8884	4.898e-06	22776
SA_caudalanteriorcingulate	rs13021985	A	G	4.2817	0.8875	1.402e-06	22776
SA_caudalanteriorcingulate	rs12986853	T	C	4.0628	0.888	4.763e-06	22776
SA_caudalanteriorcingulate	rs4664442	A	G	4.1211	0.8812	2.918e-06	22776
SA_caudalanteriorcingulate	rs4295021	T	G	4.0611	0.8885	4.86e-06	22776
SA_caudalanteriorcingulate	rs2909444	A	G	4.0806	0.8885	4.378e-06	22776
SA_caudalanteriorcingulate	rs2909455	T	C	4.0768	0.889	4.525e-06	22776
SA_caudalanteriorcingulate	rs1861979	T	C	4.1933	0.8916	2.559e-06	22776
SA_caudalanteriorcingulate	rs2909457	A	G	-4.11	0.883	3.247e-06	22776
SA_caudalanteriorcingulate	rs2909443	A	G	-4.0782	0.8903	4.63e-06	22776
SA_caudalanteriorcingulate	rs2268894	T	C	-4.165	0.8831	2.402e-06	22776
SA_caudalanteriorcingulate	rs2909448	T	C	-4.2211	0.8844	1.817e-06	22776
SA_caudalanteriorcingulate	rs143909502	A	G	29.2078	6.1424	1.983e-06	14348
SA_caudalanteriorcingulate	rs7728751	A	G	5.7237	1.0809	1.189e-07	22776
SA_caudalanteriorcingulate	rs309596	T	C	-5.8094	1.0808	7.645e-08	22776
SA_caudalanteriorcingulate	rs177930	A	G	-4.7222	1.0091	2.876e-06	22776
SA_caudalanteriorcingulate	rs309593	A	G	-5.61	1.0852	2.345e-07	22776
SA_caudalanteriorcingulate	rs309592	A	G	5.6154	1.0854	2.295e-07	22776
SA_caudalanteriorcingulate	rs309588	A	T	-5.6151	1.09	2.585e-07	22776
SA_caudalanteriorcingulate	rs151111748	A	G	-29.2551	6.3713	4.397e-06	14354
SA_caudalanteriorcingulate	rs139910389	A	G	-29.2662	6.3708	4.352e-06	14354
SA_caudalanteriorcingulate	rs2509765	T	C	6.9868	1.2826	5.108e-08	22153
SA_caudalanteriorcingulate	rs1572364	T	C	4.3126	0.8978	1.56e-06	22776
SA_caudalanteriorcingulate	rs2015433	A	G	-4.6262	0.9092	3.616e-07	22776
SA_caudalanteriorcingulate	rs6650131	C	G	4.5355	0.9075	5.791e-07	22776
SA_caudalanteriorcingulate	rs11014239	A	G	-4.3096	0.9049	1.912e-06	22393
SA_caudalanteriorcingulate	rs1537778	A	T	-4.3219	0.8973	1.459e-06	22776
SA_caudalanteriorcingulate	rs61856907	T	C	4.6585	0.9174	3.813e-07	22776
SA_caudalanteriorcingulate	rs4295955	A	G	4.4126	0.8952	8.256e-07	22776
SA_caudalanteriorcingulate	rs4381281	T	G	4.7292	0.9036	1.66e-07	22776
SA_caudalanteriorcingulate	rs61856908	T	C	-4.9014	0.9083	6.795e-08	22776
SA_caudalanteriorcingulate	rs7077191	C	G	4.5824	0.8914	2.736e-07	22776
SA_caudalanteriorcingulate	rs11599264	A	G	4.5941	0.8931	2.686e-07	22776
SA_caudalanteriorcingulate	rs1984135	T	G	4.562	0.8909	3.043e-07	22776
SA_caudalanteriorcingulate	rs12412024	A	C	4.5557	0.8907	3.142e-07	22776
SA_caudalanteriorcingulate	rs12414747	A	G	4.5602	0.8901	3.001e-07	22776
SA_caudalanteriorcingulate	rs10764497	A	G	-4.3432	0.893	1.153e-06	22776
SA_caudalanteriorcingulate	rs4548527	A	G	4.5576	0.9047	4.717e-07	22776
SA_caudalanteriorcingulate	rs11014249	T	G	-4.6191	0.9381	8.491e-07	22776
SA_caudalanteriorcingulate	rs7098013	A	G	-4.2112	0.918	4.484e-06	22776
SA_caudalanteriorcingulate	rs4748983	A	C	4.3715	0.9361	3.015e-06	22548
SA_caudalanteriorcingulate	rs1314337	T	C	4.819	0.905	1.012e-07	22776
SA_caudalanteriorcingulate	rs4553267	T	C	4.8604	0.9063	8.185e-08	22776
SA_caudalanteriorcingulate	rs9418456	T	C	4.8679	0.8893	4.399e-08	22776
SA_caudalanteriorcingulate	rs2484645	T	C	4.8868	0.8894	3.915e-08	22776
SA_caudalanteriorcingulate	rs573774505	i	r	4.7902	0.911	1.454e-07	22393
SA_caudalanteriorcingulate	rs4748985	A	G	-4.8695	0.8884	4.223e-08	22776
SA_caudalanteriorcingulate	rs4748987	A	C	4.8703	0.8883	4.191e-08	22776
SA_caudalanteriorcingulate	rs2478088	A	T	-4.8974	0.8902	3.764e-08	22776
SA_caudalanteriorcingulate	rs4748988	T	C	4.8838	0.8975	5.288e-08	22776
SA_caudalanteriorcingulate	rs4747503	C	G	-5.0037	0.8997	2.673e-08	22776
SA_caudalanteriorcingulate	rs1575863	A	G	4.9848	0.8939	2.455e-08	22776
SA_caudalanteriorcingulate	rs9418459	A	C	4.8958	0.8888	3.623e-08	22776
SA_caudalanteriorcingulate	rs2104489	T	C	4.889	0.8888	3.78e-08	22776
SA_caudalanteriorcingulate	rs2478085	T	C	-4.8692	0.8887	4.281e-08	22776
SA_caudalanteriorcingulate	rs1112633	A	C	4.945	0.8903	2.787e-08	22776
SA_caudalanteriorcingulate	rs2484648	A	G	-4.8632	0.9124	9.805e-08	22776
SA_caudalanteriorcingulate	rs1045873	A	C	-4.9883	0.912	4.51e-08	22776
SA_caudalanteriorcingulate	rs72825244	A	C	5.3713	1.1749	4.837e-06	22776
SA_caudalanteriorcingulate	11:87071171_GAGA_G	d	r	-16.6567	3.6073	3.885e-06	21532
SA_caudalanteriorcingulate	rs2247861	T	C	6.4167	1.4049	4.936e-06	22776
SA_caudalanteriorcingulate	rs11107271	T	C	6.6511	1.4456	4.206e-06	22393
SA_caudalanteriorcingulate	rs1677903	A	G	6.3954	1.3908	4.256e-06	22776
SA_caudalanteriorcingulate	rs1677902	T	C	6.412	1.3909	4.025e-06	22776
SA_caudalanteriorcingulate	rs7302836	A	G	4.2812	0.9265	3.817e-06	22776
SA_caudalanteriorcingulate	rs11160016	A	G	6.0347	1.2297	9.231e-07	21985
SA_caudalanteriorcingulate	rs36007447	A	G	5.3761	1.1746	4.721e-06	21230
SA_caudalanteriorcingulate	rs117508323	C	G	19.5098	3.9662	8.699e-07	11487
SA_caudalanteriorcingulate	rs2326254	T	C	-4.3177	0.9328	3.678e-06	22776
SA_caudalanteriorcingulate	rs147273859	C	G	28.4994	5.9712	1.817e-06	10087
SA_caudalmiddlefrontal	rs2026593	A	G	17.786	3.8478	3.795e-06	19528
SA_caudalmiddlefrontal	rs2026594	A	C	17.6067	3.8432	4.622e-06	19528
SA_caudalmiddlefrontal	rs685061	T	C	12.0395	2.4283	7.126e-07	22382
SA_caudalmiddlefrontal	rs72781420	A	G	-17.0599	3.5428	1.469e-06	20258
SA_caudalmiddlefrontal	rs2541008	T	C	12.0962	2.5427	1.963e-06	22742
SA_caudalmiddlefrontal	rs7580807	A	G	11.3525	2.4391	3.249e-06	22382
SA_caudalmiddlefrontal	rs13008325	T	G	-11.2651	2.4297	3.545e-06	22382
SA_caudalmiddlefrontal	rs13008718	T	G	-11.2126	2.4303	3.958e-06	22382
SA_caudalmiddlefrontal	rs6709906	A	G	11.5832	2.4258	1.796e-06	22382
SA_caudalmiddlefrontal	rs3815608	T	C	-11.5918	2.4246	1.746e-06	22382
SA_caudalmiddlefrontal	rs11126057	A	G	11.8985	2.503	1.997e-06	22742
SA_caudalmiddlefrontal	rs778781114	d	r	-12.0873	2.4409	7.344e-07	22357
SA_caudalmiddlefrontal	rs3856523	A	G	11.5419	2.4094	1.665e-06	22742
SA_caudalmiddlefrontal	rs7570841	A	G	11.612	2.4849	2.968e-06	22742
SA_caudalmiddlefrontal	rs2287281	A	T	-11.8231	2.4299	1.141e-06	22742
SA_caudalmiddlefrontal	rs2287282	T	C	-11.4804	2.4812	3.712e-06	22742
SA_caudalmiddlefrontal	rs771572296	d	r	-11.9129	2.4251	8.996e-07	22357
SA_caudalmiddlefrontal	rs2287283	T	C	-11.5336	2.4926	3.706e-06	22742
SA_caudalmiddlefrontal	rs142706617	i	r	-11.7639	2.5153	2.913e-06	22357
SA_caudalmiddlefrontal	rs7562708	T	G	11.6159	2.4788	2.784e-06	22742
SA_caudalmiddlefrontal	rs12997745	A	G	11.907	2.4012	7.095e-07	22742
SA_caudalmiddlefrontal	rs12465315	C	G	11.8746	2.4028	7.731e-07	22742
SA_caudalmiddlefrontal	rs2287286	C	G	-11.6186	2.4786	2.766e-06	22742
SA_caudalmiddlefrontal	rs6743531	C	G	-11.6399	2.4791	2.664e-06	22742
SA_caudalmiddlefrontal	rs770408932	d	r	-12.0039	2.5093	1.72e-06	22357
SA_caudalmiddlefrontal	2:65974662:GC_G	d	r	-12.2506	2.6327	3.267e-06	20188
SA_caudalmiddlefrontal	rs12713548	T	C	-11.5815	2.479	2.986e-06	22742
SA_caudalmiddlefrontal	rs17681189	A	C	-11.6773	2.3996	1.137e-06	22742
SA_caudalmiddlefrontal	rs6546175	T	C	11.3243	2.4617	4.22e-06	22742
SA_caudalmiddlefrontal	rs6546176	C	G	11.3174	2.4697	4.597e-06	22742
SA_caudalmiddlefrontal	rs6546177	T	G	-11.5923	2.4004	1.37e-06	22742
SA_caudalmiddlefrontal	rs7562620	A	G	-12.1078	2.4328	6.458e-07	22357
SA_caudalmiddlefrontal	rs2287287	T	C	-11.8064	2.4052	9.173e-07	22742
SA_caudalmiddlefrontal	rs2193463	A	G	11.6116	2.412	1.479e-06	22742
SA_caudalmiddlefrontal	rs2860911	C	G	-11.5737	2.48	3.06e-06	22742
SA_caudalmiddlefrontal	rs12989218	C	G	-11.2587	2.4211	3.316e-06	22742
SA_caudalmiddlefrontal	rs13015657	T	C	11.8713	2.4088	8.299e-07	22742
SA_caudalmiddlefrontal	rs7600385	A	T	11.5716	2.4822	3.133e-06	22742
SA_caudalmiddlefrontal	rs7591503	C	G	11.9317	2.4123	7.568e-07	22742
SA_caudalmiddlefrontal	rs6546178	A	G	11.9315	2.4123	7.574e-07	22742
SA_caudalmiddlefrontal	rs10168499	A	G	-11.6351	2.4945	3.097e-06	22742
SA_caudalmiddlefrontal	rs6745682	A	G	13.1213	2.4626	9.917e-08	22742
SA_caudalmiddlefrontal	rs888278	T	G	-13.1245	2.5947	4.234e-07	22742
SA_caudalmiddlefrontal	rs6546180	T	C	-11.6564	2.5432	4.576e-06	22742
SA_caudalmiddlefrontal	2:105982130:A_AC	i	r	-20.5709	4.4031	2.983e-06	20188
SA_caudalmiddlefrontal	rs1386295	C	G	13.6953	2.9489	3.415e-06	22742
SA_caudalmiddlefrontal	rs1459219	T	C	23.5222	4.7225	6.331e-07	19424
SA_caudalmiddlefrontal	rs7557415	A	G	-22.2273	4.6052	1.389e-06	19424
SA_caudalmiddlefrontal	rs7597165	A	G	-22.6475	4.4958	4.716e-07	19813
SA_caudalmiddlefrontal	rs7607492	T	C	-22.4179	4.7148	1.986e-06	18433
SA_caudalmiddlefrontal	rs7563664	T	G	19.7001	4.2425	3.425e-06	20470
SA_caudalmiddlefrontal	rs2061039	T	C	-19.0868	4.1238	3.683e-06	20470
SA_caudalmiddlefrontal	rs1542348	T	C	19.1151	4.1206	3.502e-06	20470
SA_caudalmiddlefrontal	rs1542349	T	C	-19.1647	4.1393	3.658e-06	20470
SA_caudalmiddlefrontal	rs1563207	T	C	-19.1467	4.1231	3.421e-06	20470
SA_caudalmiddlefrontal	rs1563206	T	C	23.5897	4.6058	3.027e-07	19424
SA_caudalmiddlefrontal	rs13421798	T	C	23.4146	4.5974	3.525e-07	19424
SA_caudalmiddlefrontal	rs13395687	C	G	23.8957	4.6062	2.128e-07	19424
SA_caudalmiddlefrontal	rs6713245	T	C	-19.9918	4.1072	1.13e-06	20470
SA_caudalmiddlefrontal	rs28712487	A	G	-19.8937	4.1094	1.292e-06	20470
SA_caudalmiddlefrontal	rs6721154	T	C	-21.2695	4.2968	7.42e-07	19813
SA_caudalmiddlefrontal	rs12467400	A	G	-21.7627	4.3528	5.742e-07	19621
SA_caudalmiddlefrontal	3:4786626:TTCCT	d	r	16.3705	3.3579	1.087e-06	17259
SA_caudalmiddlefrontal	rs2366655	T	C	-19.9124	4.3384	4.438e-06	21384
SA_caudalmiddlefrontal	rs55744388	A	G	-16.8091	3.6243	3.52e-06	20004
SA_caudalmiddlefrontal	rs7628879	T	G	-16.2835	3.5294	3.955e-06	21384
SA_caudalmiddlefrontal	rs12633198	T	G	-16.8141	3.4034	7.799e-07	21384
SA_caudalmiddlefrontal	rs6764219	T	G	-16.8329	3.3969	7.216e-07	21384
SA_caudalmiddlefrontal	rs58396760	C	G	-12.6389	2.7658	4.885e-06	21384
SA_caudalmiddlefrontal	rs750776	T	C	-16.0065	3.3031	1.261e-06	21384
SA_caudalmiddlefrontal	rs145702514	i	r	-15.9559	3.3776	2.313e-06	20999
SA_caudalmiddlefrontal	rs5855500	i	r	-15.5108	3.2923	2.462e-06	20999
SA_caudalmiddlefrontal	rs5855503	i	r	-11.7959	2.5792	4.799e-06	20999
SA_caudalmiddlefrontal	rs140045876	i	r	-12.4175	2.5952	1.711e-06	20999
SA_caudalmiddlefrontal	rs1146045	T	C	11.9176	2.5792	3.824e-06	21384
SA_caudalmiddlefrontal	rs655045	T	C	-12.0213	2.5785	3.13e-06	21384
SA_caudalmiddlefrontal	rs2651152	A	T	-13.7606	3.0069	4.734e-06	21384
SA_caudalmiddlefrontal	rs13061583	T	C	11.7904	2.499	2.381e-06	21384
SA_caudalmiddlefrontal	rs1797855	A	G	-13.795	2.9946	4.093e-06	21384
SA_caudalmiddlefrontal	rs1905949	A	G	13.1739	2.4788	1.069e-07	21384
SA_caudalmiddlefrontal	rs12497385	T	G	12.2863	2.4911	8.138e-07	21384
SA_caudalmiddlefrontal	rs12493228	T	C	-13.1198	2.4776	1.187e-07	21384
SA_caudalmiddlefrontal	rs12496544	T	C	13.1108	2.4774	1.209e-07	21384
SA_caudalmiddlefrontal	rs2367932	A	C	12.1088	2.4666	9.151e-07	21384
SA_caudalmiddlefrontal	rs1976393	T	C	12.1268	2.4665	8.804e-07	21384
SA_caudalmiddlefrontal	rs1566491	A	G	12.0908	2.4654	9.379e-07	21384
SA_caudalmiddlefrontal	rs9818840	T	G	12.109	2.4649	8.989e-07	21384
SA_caudalmiddlefrontal	rs9843602	A	G	-12.1148	2.4655	8.931e-07	21384
SA_caudalmiddlefrontal	rs1124786	T	G	-12.2183	2.4716	7.673e-07	21384
SA_caudalmiddlefrontal	rs2630244	T	C	-14.6448	3.1913	4.454e-06	21384
SA_caudalmiddlefrontal	rs2173799	T	G	12.153	2.5732	2.324e-06	20999
SA_caudalmiddlefrontal	rs7637412	T	C	12.1598	2.4948	1.093e-06	20999
SA_caudalmiddlefrontal	rs9863899	T	C	11.9934	2.558	2.751e-06	21384
SA_caudalmiddlefrontal	rs9821927	A	C	-11.9918	2.5578	2.754e-06	21384
SA_caudalmiddlefrontal	rs9844726	T	C	-11.9885	2.5577	2.768e-06	21384
SA_caudalmiddlefrontal	rs9868158	C	G	-11.9867	2.5571	2.765e-06	21384
SA_caudalmiddlefrontal	rs9849380	T	C	-12.249	2.486	8.341e-07	21384
SA_caudalmiddlefrontal	rs9878109	T	G	11.9761	2.5538	2.738e-06	21384
SA_caudalmiddlefrontal	rs11710371	A	T	-11.9866	2.5542	2.693e-06	21384
SA_caudalmiddlefrontal	rs9873695	C	G	-11.9881	2.5548	2.7e-06	21384
SA_caudalmiddlefrontal	rs6763875	T	C	-11.976	2.5548	2.764e-06	21384
SA_caudalmiddlefrontal	rs9812175	A	G	12.0067	2.5554	2.62e-06	21384
SA_caudalmiddlefrontal	rs9878726	T	C	11.9863	2.5553	2.721e-06	21384
SA_caudalmiddlefrontal	rs12496695	T	C	-11.5257	2.4874	3.592e-06	21384
SA_caudalmiddlefrontal	rs13077740	T	C	11.7401	2.4908	2.437e-06	21384
SA_caudalmiddlefrontal	rs7616297	T	C	-12.3432	2.4734	6.029e-07	21384
SA_caudalmiddlefrontal	rs67971238	T	C	16.2649	3.3579	1.274e-06	21384
SA_caudalmiddlefrontal	rs13089562	T	C	11.5072	2.5005	4.186e-06	21384
SA_caudalmiddlefrontal	rs875855	A	G	12.4449	2.6185	2.007e-06	21384
SA_caudalmiddlefrontal	rs789836	A	G	-14.7222	2.9795	7.766e-07	20956
SA_caudalmiddlefrontal	rs806073	T	C	-14.189	2.9512	1.526e-06	20956
SA_caudalmiddlefrontal	rs813149	T	C	-16.2628	3.1995	3.715e-07	20956
SA_caudalmiddlefrontal	rs13071166	A	G	-16.6436	3.2506	3.054e-07	19527
SA_caudalmiddlefrontal	rs11719838	T	C	-15.3161	3.0318	4.375e-07	20956
SA_caudalmiddlefrontal	rs13088466	A	G	-15.6547	3.0569	3.039e-07	20956
SA_caudalmiddlefrontal	rs115761034	T	C	83.7768	17.7868	2.476e-06	10772
SA_caudalmiddlefrontal	rs10463859	T	C	-12.9947	2.6911	1.374e-06	22357
SA_caudalmiddlefrontal	rs2025676	A	G	27.0665	5.6923	1.985e-06	18248
SA_caudalmiddlefrontal	rs17551155	T	C	-19.1397	4.1485	3.957e-06	22742
SA_caudalmiddlefrontal	rs12660096	A	G	-21.3372	3.9816	8.372e-08	22742
SA_caudalmiddlefrontal	rs10498973	A	G	-21.5813	3.9763	5.716e-08	22742
SA_caudalmiddlefrontal	rs4707669	A	G	-21.5862	3.9786	5.776e-08	22742
SA_caudalmiddlefrontal	rs755757	A	G	21.1749	3.9761	1.007e-07	22742
SA_caudalmiddlefrontal	rs35254489	T	C	-21.4693	3.9778	6.765e-08	22742
SA_caudalmiddlefrontal	rs4706390	T	G	-21.5671	3.9791	5.958e-08	22742
SA_caudalmiddlefrontal	rs10944534	A	C	-21.5944	3.9786	5.711e-08	22742
SA_caudalmiddlefrontal	rs13191364	T	C	-21.5792	3.9789	5.846e-08	22742
SA_caudalmiddlefrontal	rs1884257	T	G	21.5552	3.9787	6.038e-08	22742
SA_caudalmiddlefrontal	rs9362865	T	C	20.9695	3.966	1.241e-07	22742
SA_caudalmiddlefrontal	rs9342269	A	G	-21.6242	3.9819	5.618e-08	22742
SA_caudalmiddlefrontal	rs9345124	A	C	18.5284	3.0727	1.64e-09	22742
SA_caudalmiddlefrontal	rs9345125	A	G	18.7181	3.0839	1.282e-09	22742
SA_caudalmiddlefrontal	rs9351259	A	G	-18.5576	3.0757	1.604e-09	22742
SA_caudalmiddlefrontal	rs9359935	T	G	18.1617	3.0819	3.791e-09	22742
SA_caudalmiddlefrontal	rs6923112	A	C	18.3016	3.0794	2.794e-09	22742
SA_caudalmiddlefrontal	rs6903522	T	G	21.5252	3.9923	6.982e-08	22742
SA_caudalmiddlefrontal	rs77898045	T	C	-21.4883	3.992	7.334e-08	22742
SA_caudalmiddlefrontal	6:92006481:AGT_A	d	r	-21.3443	4.0307	1.188e-07	22357
SA_caudalmiddlefrontal	rs7757173	T	G	21.3571	3.991	8.733e-08	22742
SA_caudalmiddlefrontal	rs2207617	A	T	18.2813	3.082	2.998e-09	22742
SA_caudalmiddlefrontal	rs9353816	A	G	-18.2103	3.0811	3.415e-09	22742
SA_caudalmiddlefrontal	rs9353817	C	G	-18.1912	3.0807	3.531e-09	22742
SA_caudalmiddlefrontal	rs9353818	C	G	21.0483	3.9914	1.339e-07	22742
SA_caudalmiddlefrontal	rs9342271	T	G	18.1754	3.0811	3.658e-09	22742
SA_caudalmiddlefrontal	rs4706391	A	T	-18.3942	3.077	2.26e-09	22742
SA_caudalmiddlefrontal	rs4706392	A	T	18.3512	3.0744	2.387e-09	22742
SA_caudalmiddlefrontal	rs4707671	A	G	-18.6832	3.0726	1.197e-09	22742
SA_caudalmiddlefrontal	rs2180127	T	C	18.6725	3.0763	1.281e-09	22742
SA_caudalmiddlefrontal	rs2144366	C	G	20.1477	3.5042	8.949e-09	22742
SA_caudalmiddlefrontal	rs12174540	A	G	17.7362	3.7589	2.377e-06	22742
SA_caudalmiddlefrontal	rs9353820	A	G	-17.7858	3.7966	2.804e-06	22742
SA_caudalmiddlefrontal	rs7751503	C	G	18.5556	3.8156	1.156e-06	22742
SA_caudalmiddlefrontal	rs1268121	A	G	15.3181	3.2239	2.019e-06	22015
SA_caudalmiddlefrontal	rs6919397	T	G	-13.9147	2.4273	9.895e-09	22475
SA_caudalmiddlefrontal	rs9388486	T	C	-13.9102	2.4269	9.946e-09	22475
SA_caudalmiddlefrontal	rs9375435	T	C	14.0737	2.4389	7.9e-09	22475
SA_caudalmiddlefrontal	rs17754780	T	C	13.8952	2.4255	1.011e-08	22475
SA_caudalmiddlefrontal	rs6907898	T	C	14.0024	2.4252	7.751e-09	22475
SA_caudalmiddlefrontal	rs9401876	A	C	13.8885	2.4299	1.093e-08	22475
SA_caudalmiddlefrontal	rs2045258	A	G	-14.0134	2.4192	6.933e-09	22475
SA_caudalmiddlefrontal	rs9388487	T	G	14.0737	2.4395	7.966e-09	22278
SA_caudalmiddlefrontal	rs2326387	A	G	14.0855	2.4153	5.482e-09	22475
SA_caudalmiddlefrontal	rs9398803	A	G	-13.497	2.4285	2.733e-08	22475
SA_caudalmiddlefrontal	rs9388489	A	G	-14.1857	2.4	3.404e-09	22475
SA_caudalmiddlefrontal	6:126699049:GT_G	d	r	15.3083	3.1447	1.128e-06	19921
SA_caudalmiddlefrontal	6:126699054:GA_G	d	r	16.487	2.9764	3.038e-08	19921
SA_caudalmiddlefrontal	rs1361262	T	C	-14.1875	2.4088	3.867e-09	22475
SA_caudalmiddlefrontal	rs9388490	T	C	14.6244	2.4419	2.111e-09	22475
SA_caudalmiddlefrontal	rs1591805	A	G	-11.8211	2.4678	1.666e-06	22475
SA_caudalmiddlefrontal	rs9398805	T	C	13.862	2.4067	8.43e-09	22475
SA_caudalmiddlefrontal	rs4897178	T	G	-13.8892	2.5685	6.39e-08	22090
SA_caudalmiddlefrontal	rs4897179	A	G	14.8695	2.4566	1.423e-09	22475
SA_caudalmiddlefrontal	rs576049	T	G	-13.8263	2.4374	1.407e-08	22090
SA_caudalmiddlefrontal	rs59698523	T	C	-13.0722	2.5349	2.512e-07	22090
SA_caudalmiddlefrontal	rs112166936	A	C	-13.9117	2.5313	3.887e-08	22090
SA_caudalmiddlefrontal	rs9321065	A	G	13.8432	2.41	9.25e-09	22475
SA_caudalmiddlefrontal	rs2039735	T	C	-14.2676	2.4444	5.322e-09	22475
SA_caudalmiddlefrontal	rs1538172	A	G	-13.9491	2.4063	6.757e-09	22475
SA_caudalmiddlefrontal	rs9401881	T	C	13.9467	2.4068	6.845e-09	22475
SA_caudalmiddlefrontal	rs4565329	T	C	13.9817	2.4068	6.279e-09	22475
SA_caudalmiddlefrontal	rs1538170	T	C	13.9613	2.4076	6.679e-09	22475
SA_caudalmiddlefrontal	rs4897181	T	C	13.8832	2.4063	7.956e-09	22475
SA_caudalmiddlefrontal	rs9401882	A	G	-14.0366	2.4069	5.479e-09	22475
SA_caudalmiddlefrontal	rs4897182	T	G	-14.0169	2.4064	5.716e-09	22475
SA_caudalmiddlefrontal	rs9398808	T	G	13.9807	2.4067	6.278e-09	22475
SA_caudalmiddlefrontal	rs9385399	T	G	13.8698	2.4072	8.319e-09	22475
SA_caudalmiddlefrontal	rs1415671	T	G	-13.9397	2.4064	6.922e-09	22475
SA_caudalmiddlefrontal	rs2184968	T	C	-14.2121	2.4115	3.781e-09	22475
SA_caudalmiddlefrontal	rs2152876	A	G	13.9287	2.4076	7.242e-09	22475
SA_caudalmiddlefrontal	rs9385400	T	G	-13.9192	2.4088	7.54e-09	22475
SA_caudalmiddlefrontal	rs1361107	A	C	-13.617	2.4118	1.643e-08	22475
SA_caudalmiddlefrontal	rs1361108	T	C	13.817	2.4093	9.754e-09	22475
SA_caudalmiddlefrontal	rs1361109	T	C	14.0291	2.4092	5.772e-09	22475
SA_caudalmiddlefrontal	rs1572569	A	G	14.0122	2.4098	6.078e-09	22475
SA_caudalmiddlefrontal	rs2184967	T	C	13.9077	2.411	8.005e-09	22475
SA_caudalmiddlefrontal	rs4559102	A	G	13.8612	2.4104	8.89e-09	22475
SA_caudalmiddlefrontal	rs9388494	T	G	13.8579	2.4198	1.023e-08	22475
SA_caudalmiddlefrontal	rs9375441	A	G	13.9229	2.4115	7.761e-09	22475
SA_caudalmiddlefrontal	rs4895808	T	C	13.9176	2.4117	7.891e-09	22475
SA_caudalmiddlefrontal	rs9388495	A	G	14.0303	2.4126	6.045e-09	22475
SA_caudalmiddlefrontal	rs9388496	A	G	-13.8467	2.4116	9.372e-09	22475
SA_caudalmiddlefrontal	rs1844594	A	G	14.0111	2.4121	6.293e-09	22475
SA_caudalmiddlefrontal	rs9398809	T	C	13.8812	2.4118	8.641e-09	22475
SA_caudalmiddlefrontal	rs9385401	T	C	13.8959	2.4118	8.326e-09	22475
SA_caudalmiddlefrontal	rs11759026	A	G	-20.2332	2.9912	1.34e-11	22475
SA_caudalmiddlefrontal	rs9401883	A	G	-13.925	2.4106	7.622e-09	22475
SA_caudalmiddlefrontal	rs1159619	A	C	13.8545	2.4095	8.931e-09	22475
SA_caudalmiddlefrontal	rs9375442	A	C	-14.0481	2.4118	5.717e-09	22475
SA_caudalmiddlefrontal	rs2050644	A	G	-13.9277	2.4089	7.394e-09	22475
SA_caudalmiddlefrontal	rs4422634	T	C	-13.9581	2.408	6.773e-09	22475
SA_caudalmiddlefrontal	rs1120786	T	G	-13.9703	2.4155	7.312e-09	22475
SA_caudalmiddlefrontal	rs9372839	A	G	13.9675	2.4137	7.179e-09	22475
SA_caudalmiddlefrontal	rs9398810	A	C	13.9437	2.4074	6.955e-09	22475
SA_caudalmiddlefrontal	rs4418209	T	G	-14.0394	2.4082	5.546e-09	22475
SA_caudalmiddlefrontal	rs9372840	A	C	-13.9432	2.41	7.231e-09	22475
SA_caudalmiddlefrontal	rs2130603	A	C	-14.0677	2.4193	6.07e-09	22475
SA_caudalmiddlefrontal	rs7738135	A	G	14.0208	2.4203	6.909e-09	22475
SA_caudalmiddlefrontal	rs4053271	T	C	-14.0205	2.4202	6.91e-09	22475
SA_caudalmiddlefrontal	rs1490387	A	C	14.0167	2.4142	6.404e-09	22475
SA_caudalmiddlefrontal	rs9375446	A	G	14.0169	2.4143	6.41e-09	22475
SA_caudalmiddlefrontal	rs1490388	T	C	14.0138	2.4145	6.473e-09	22475
SA_caudalmiddlefrontal	rs1907067	A	C	-14.0901	2.4156	5.445e-09	22475
SA_caudalmiddlefrontal	rs1602278	A	C	-14.8163	2.4256	1.007e-09	22278
SA_caudalmiddlefrontal	rs1490384	T	C	15.2442	2.4099	2.522e-10	22475
SA_caudalmiddlefrontal	rs6925689	T	C	-15.0752	2.4515	7.775e-10	22475
SA_caudalmiddlefrontal	rs1155939	A	C	14.8599	2.4109	7.11e-10	22475
SA_caudalmiddlefrontal	rs1155938	A	C	14.8202	2.4098	7.749e-10	22475
SA_caudalmiddlefrontal	rs58321169	T	C	19.4623	3.0527	1.823e-10	21861
SA_caudalmiddlefrontal	rs9375447	A	G	-14.7154	2.4035	9.212e-10	22475
SA_caudalmiddlefrontal	rs1490385	T	C	14.5233	2.4161	1.844e-09	22475
SA_caudalmiddlefrontal	rs9401888	A	G	-14.6538	2.3984	9.978e-10	22475
SA_caudalmiddlefrontal	rs9401890	A	G	-14.5891	2.43	1.928e-09	22475
SA_caudalmiddlefrontal	rs6931369	T	C	14.5823	2.403	1.292e-09	22475
SA_caudalmiddlefrontal	rs9401891	T	G	15.0308	2.4138	4.753e-10	22475
SA_caudalmiddlefrontal	rs9401892	A	G	14.8227	2.399	6.465e-10	22475
SA_caudalmiddlefrontal	rs4621655	A	G	14.825	2.399	6.423e-10	22475
SA_caudalmiddlefrontal	rs4621657	A	G	14.8197	2.3989	6.508e-10	22475
SA_caudalmiddlefrontal	rs1844593	A	G	14.8703	2.401	5.889e-10	22475
SA_caudalmiddlefrontal	rs3861455	A	C	-14.7186	2.399	8.503e-10	22475
SA_caudalmiddlefrontal	rs9372841	A	G	-14.7413	2.3991	8.024e-10	22475
SA_caudalmiddlefrontal	rs3861456	A	G	-14.7335	2.3981	8.055e-10	22475
SA_caudalmiddlefrontal	rs3861457	T	C	-14.8604	2.399	5.85e-10	22475
SA_caudalmiddlefrontal	rs9388501	T	C	-14.8171	2.3992	6.582e-10	22475
SA_caudalmiddlefrontal	6:126903111	T	C	-15.1809	2.7992	5.851e-08	19921
SA_caudalmiddlefrontal	rs9401893	A	G	-14.8222	2.3978	6.35e-10	22475
SA_caudalmiddlefrontal	rs9388502	A	G	14.5926	2.4051	1.301e-09	22475
SA_caudalmiddlefrontal	rs3861458	A	G	14.6038	2.3969	1.109e-09	22475
SA_caudalmiddlefrontal	rs140965240	T	C	-33.1447	6.8024	1.102e-06	19261
SA_caudalmiddlefrontal	rs9388503	A	G	-14.7507	2.4621	2.085e-09	22090
SA_caudalmiddlefrontal	rs9372842	T	C	-14.5018	2.3943	1.388e-09	22475
SA_caudalmiddlefrontal	rs1826189	T	C	14.5558	2.3949	1.218e-09	22475
SA_caudalmiddlefrontal	rs9482757	A	C	-14.6606	2.3936	9.07e-10	22475
SA_caudalmiddlefrontal	rs12208811	T	G	-14.5105	2.3936	1.344e-09	22475
SA_caudalmiddlefrontal	rs7743860	T	G	-14.5063	2.3935	1.356e-09	22475
SA_caudalmiddlefrontal	rs4584000	T	C	-14.4069	2.3941	1.769e-09	22475
SA_caudalmiddlefrontal	rs6914367	T	C	14.6272	2.4044	1.175e-09	22475
SA_caudalmiddlefrontal	rs7738836	A	G	-14.2871	2.4085	2.993e-09	22475
SA_caudalmiddlefrontal	rs4339479	A	G	14.5587	2.3963	1.236e-09	22475
SA_caudalmiddlefrontal	rs4629707	T	C	-14.7767	2.3946	6.793e-10	22475
SA_caudalmiddlefrontal	rs4243491	T	C	-14.6306	2.3979	1.051e-09	22475
SA_caudalmiddlefrontal	rs9401897	A	G	-14.6484	2.3997	1.032e-09	22475
SA_caudalmiddlefrontal	rs9491653	A	G	-14.6503	2.3993	1.021e-09	22475
SA_caudalmiddlefrontal	rs13207431	T	C	14.9108	2.5718	6.715e-09	22090
SA_caudalmiddlefrontal	rs1340952	T	C	14.6629	2.4027	1.044e-09	22475
SA_caudalmiddlefrontal	rs1340953	A	G	-14.6767	2.398	9.334e-10	22475
SA_caudalmiddlefrontal	rs1417572	T	C	-14.9059	2.4051	5.735e-10	22475
SA_caudalmiddlefrontal	rs9375449	T	C	-14.7641	2.3977	7.389e-10	22475
SA_caudalmiddlefrontal	rs1538956	T	G	14.7758	2.3976	7.152e-10	22475
SA_caudalmiddlefrontal	rs4273712	A	G	-19.3707	2.7265	1.208e-12	22115
SA_caudalmiddlefrontal	rs4626447	A	G	14.7226	2.398	8.283e-10	22475
SA_caudalmiddlefrontal	rs4549631	T	C	-14.7819	2.3967	6.936e-10	22475
SA_caudalmiddlefrontal	rs9388507	A	C	14.6774	2.3973	9.209e-10	22475
SA_caudalmiddlefrontal	rs3905044	A	G	-14.7378	2.3991	8.099e-10	22475
SA_caudalmiddlefrontal	rs6911485	A	G	-14.7341	2.3998	8.268e-10	22475
SA_caudalmiddlefrontal	rs4895813	T	G	14.7685	2.3998	7.557e-10	22475
SA_caudalmiddlefrontal	rs6913430	T	G	-14.7218	2.4017	8.801e-10	22475
SA_caudalmiddlefrontal	rs9375450	A	G	14.7146	2.404	9.311e-10	22475
SA_caudalmiddlefrontal	rs9388509	A	G	14.9119	2.4064	5.76e-10	22475
SA_caudalmiddlefrontal	rs6918725	T	G	-15.0547	2.446	7.52e-10	22475
SA_caudalmiddlefrontal	rs8180649	T	C	-14.8434	2.4106	7.386e-10	22475
SA_caudalmiddlefrontal	rs6925607	T	C	14.7161	2.4622	2.275e-09	22475
SA_caudalmiddlefrontal	rs6912198	A	G	-15.6504	2.6156	2.185e-09	22090
SA_caudalmiddlefrontal	rs7750293	T	C	14.7636	2.4685	2.22e-09	22090
SA_caudalmiddlefrontal	rs9398814	A	G	-14.3144	2.4196	3.3e-09	22475
SA_caudalmiddlefrontal	rs11154367	T	C	-14.5808	2.4957	5.144e-09	22090
SA_caudalmiddlefrontal	rs4316017	T	G	-14.8616	2.4804	2.078e-09	22090
SA_caudalmiddlefrontal	rs4473871	A	G	15.7683	2.6062	1.447e-09	22090
SA_caudalmiddlefrontal	rs3850234	T	G	-15.0984	2.4338	5.517e-10	22278
SA_caudalmiddlefrontal	rs853961	T	G	-14.9802	2.4156	5.591e-10	22475
SA_caudalmiddlefrontal	rs6569469	T	C	-14.7627	2.4156	9.87e-10	22475
SA_caudalmiddlefrontal	rs864937	A	G	-14.8926	2.4187	7.395e-10	22475
SA_caudalmiddlefrontal	rs853985	T	C	-14.7388	2.4234	1.189e-09	22475
SA_caudalmiddlefrontal	rs853987	A	G	14.854	2.4215	8.553e-10	22475
SA_caudalmiddlefrontal	rs853962	T	G	-14.706	2.4228	1.28e-09	22475
SA_caudalmiddlefrontal	rs4460221	A	G	-14.7588	2.43	1.252e-09	22475
SA_caudalmiddlefrontal	rs1269195	T	C	-14.5928	2.4247	1.762e-09	22475
SA_caudalmiddlefrontal	rs1262543	A	G	-14.5915	2.4233	1.731e-09	22475
SA_caudalmiddlefrontal	rs853965	T	C	-14.7731	2.4331	1.266e-09	22475
SA_caudalmiddlefrontal	rs853966	T	G	15.0858	2.4887	1.347e-09	22475
SA_caudalmiddlefrontal	rs853981	T	C	-13.9278	2.4158	8.155e-09	22475
SA_caudalmiddlefrontal	rs853982	T	C	-13.9813	2.4143	7e-09	22475
SA_caudalmiddlefrontal	rs853983	A	G	-13.8573	2.4145	9.513e-09	22475
SA_caudalmiddlefrontal	rs1101558	A	G	-13.3127	2.4421	4.996e-08	22475
SA_caudalmiddlefrontal	rs1101559	T	C	-13.3204	2.442	4.907e-08	22475
SA_caudalmiddlefrontal	rs1101561	A	G	-13.9537	2.4317	9.559e-09	22475
SA_caudalmiddlefrontal	rs1101562	A	G	13.7478	2.4389	1.731e-08	22090
SA_caudalmiddlefrontal	rs1101563	T	C	13.6637	2.4201	1.643e-08	22475
SA_caudalmiddlefrontal	rs1313696	A	G	14.0249	2.4453	9.724e-09	22090
SA_caudalmiddlefrontal	rs1313697	A	G	-13.9141	2.425	9.588e-09	22475
SA_caudalmiddlefrontal	rs1262555	A	G	-13.6333	2.4878	4.251e-08	22475
SA_caudalmiddlefrontal	rs1262557	T	C	-13.7778	2.4514	1.905e-08	22115
SA_caudalmiddlefrontal	rs1022573	A	C	-14.3584	2.4278	3.334e-09	22115
SA_caudalmiddlefrontal	rs853976	T	C	-13.8014	2.4542	1.869e-08	22115
SA_caudalmiddlefrontal	rs853977	T	C	14.4004	2.4293	3.071e-09	22115
SA_caudalmiddlefrontal	rs853969	A	G	14.4168	2.4324	3.087e-09	22115
SA_caudalmiddlefrontal	rs853970	A	G	14.428	2.4317	2.972e-09	22115
SA_caudalmiddlefrontal	rs2793051	T	C	-14.319	2.5088	1.146e-08	21730
SA_caudalmiddlefrontal	rs853971	T	C	14.3706	2.4359	3.648e-09	22115
SA_caudalmiddlefrontal	rs1101556	T	G	14.4628	2.4362	2.908e-09	22115
SA_caudalmiddlefrontal	rs1101557	T	C	14.3697	2.4372	3.726e-09	22115
SA_caudalmiddlefrontal	rs853973	A	G	14.4577	2.4365	2.961e-09	22115
SA_caudalmiddlefrontal	rs853974	T	C	18.7451	2.7811	1.581e-11	22115
SA_caudalmiddlefrontal	rs853975	T	C	-14.1351	2.4445	7.367e-09	22115
SA_caudalmiddlefrontal	rs853968	T	C	-14.3454	2.4387	4.041e-09	22115
SA_caudalmiddlefrontal	rs861237	T	C	-14.6521	2.4435	2.017e-09	22115
SA_caudalmiddlefrontal	rs1262545	T	C	-14.3645	2.4413	4.007e-09	22115
SA_caudalmiddlefrontal	rs1262546	T	C	14.3683	2.4419	4.003e-09	22115
SA_caudalmiddlefrontal	rs979197	T	C	-14.4968	2.441	2.871e-09	22115
SA_caudalmiddlefrontal	rs1262550	A	C	14.4352	2.4603	4.433e-09	22115
SA_caudalmiddlefrontal	rs1262551	T	C	-14.4771	2.4423	3.071e-09	22115
SA_caudalmiddlefrontal	rs1262552	T	C	-14.492	2.4427	2.977e-09	22115
SA_caudalmiddlefrontal	rs1262553	T	C	14.3911	2.4437	3.885e-09	22115
SA_caudalmiddlefrontal	rs1015446	A	G	-14.4534	2.4478	3.534e-09	22115
SA_caudalmiddlefrontal	rs1355146	A	C	-11.545	2.4247	1.922e-06	22475
SA_caudalmiddlefrontal	rs973855	T	C	11.481	2.4229	2.153e-06	22475
SA_caudalmiddlefrontal	rs973856	T	C	11.5748	2.4335	1.971e-06	22475
SA_caudalmiddlefrontal	rs1396648	A	C	11.308	2.4145	2.821e-06	22475
SA_caudalmiddlefrontal	rs9390326	A	G	-11.2444	2.4117	3.127e-06	22475
SA_caudalmiddlefrontal	rs9497316	A	C	11.2123	2.4139	3.403e-06	22475
SA_caudalmiddlefrontal	rs9403706	T	C	11.2778	2.4095	2.861e-06	22475
SA_caudalmiddlefrontal	rs9390327	A	G	11.5372	2.4206	1.877e-06	22475
SA_caudalmiddlefrontal	rs9399549	T	C	-11.2849	2.4088	2.801e-06	22475
SA_caudalmiddlefrontal	rs9403707	A	G	11.3057	2.4057	2.608e-06	22475
SA_caudalmiddlefrontal	rs373527	T	C	-11.1555	2.4262	4.267e-06	22475
SA_caudalmiddlefrontal	rs365515	A	G	11.2325	2.4042	2.984e-06	22475
SA_caudalmiddlefrontal	rs413880	A	G	-11.3293	2.4059	2.491e-06	22475
SA_caudalmiddlefrontal	rs397311	T	C	11.3903	2.4084	2.252e-06	22475
SA_caudalmiddlefrontal	rs403584	A	G	-11.3507	2.4068	2.403e-06	22475
SA_caudalmiddlefrontal	rs448939	T	C	11.1785	2.4097	3.503e-06	22475
SA_caudalmiddlefrontal	rs400968	A	G	11.3617	2.4062	2.337e-06	22475
SA_caudalmiddlefrontal	rs391820	T	C	-11.4243	2.407	2.072e-06	22475
SA_caudalmiddlefrontal	rs1883407	T	C	11.4223	2.4071	2.081e-06	22475
SA_caudalmiddlefrontal	rs421032	A	G	11.406	2.4066	2.143e-06	22475
SA_caudalmiddlefrontal	rs9390329	T	C	11.404	2.4066	2.151e-06	22475
SA_caudalmiddlefrontal	rs367612	A	G	11.4081	2.4056	2.112e-06	22475
SA_caudalmiddlefrontal	rs377143	T	C	-11.2496	2.406	2.931e-06	22475
SA_caudalmiddlefrontal	rs406979	T	G	-11.4138	2.4049	2.075e-06	22475
SA_caudalmiddlefrontal	rs375692	A	G	11.3909	2.4041	2.156e-06	22475
SA_caudalmiddlefrontal	rs371744	T	C	-11.4657	2.4055	1.875e-06	22475
SA_caudalmiddlefrontal	rs398060	T	C	11.2888	2.4052	2.687e-06	22475
SA_caudalmiddlefrontal	rs392014	A	C	11.4715	2.405	1.843e-06	22475
SA_caudalmiddlefrontal	rs374464	A	C	11.4237	2.4053	2.039e-06	22475
SA_caudalmiddlefrontal	rs436066	T	C	-11.4061	2.406	2.131e-06	22475
SA_caudalmiddlefrontal	rs450076	T	G	-11.4103	2.4054	2.1e-06	22475
SA_caudalmiddlefrontal	rs441477	T	C	-11.4301	2.4071	2.05e-06	22475
SA_caudalmiddlefrontal	rs418662	A	C	11.2337	2.407	3.054e-06	22475
SA_caudalmiddlefrontal	rs373704	A	C	-10.9856	2.4055	4.95e-06	22475
SA_caudalmiddlefrontal	rs73337296	A	G	-47.2935	10.0981	2.822e-06	11943
SA_caudalmiddlefrontal	rs13248765	A	C	12.3032	2.6485	3.394e-06	22742
SA_caudalmiddlefrontal	8:20207531_AG_A	d	r	13.4844	2.8545	2.314e-06	20188
SA_caudalmiddlefrontal	8:20212668:CTT_C	d	r	13.119	2.7489	1.82e-06	20188
SA_caudalmiddlefrontal	rs2582778	T	G	-11.0513	2.419	4.913e-06	22742
SA_caudalmiddlefrontal	rs10100077	A	C	-11.0851	2.4088	4.184e-06	22742
SA_caudalmiddlefrontal	rs10097264	T	G	-11.1125	2.4083	3.945e-06	22742
SA_caudalmiddlefrontal	rs7010261	A	G	-11.2725	2.4254	3.358e-06	22742
SA_caudalmiddlefrontal	rs11774804	T	C	-11.4191	2.4155	2.274e-06	22742
SA_caudalmiddlefrontal	8:106961499	T	C	116.945	23.3515	5.5e-07	10629
SA_caudalmiddlefrontal	rs113372907	A	G	-12.9341	2.7369	2.293e-06	22314
SA_caudalmiddlefrontal	rs4988937	A	G	17.5785	3.6808	1.79e-06	19727
SA_caudalmiddlefrontal	rs10893300	T	C	-14.1572	3.0308	2.995e-06	22382
SA_caudalmiddlefrontal	rs374905954	i	r	-14.0643	3.0226	3.269e-06	22357
SA_caudalmiddlefrontal	rs9531216	A	G	14.4262	3.0871	2.968e-06	22742
SA_caudalmiddlefrontal	rs1418985	C	G	-14.2288	3.0557	3.216e-06	22742
SA_caudalmiddlefrontal	rs12863346	A	C	-13.8304	2.9849	3.595e-06	22742
SA_caudalmiddlefrontal	rs35175201	A	C	13.7261	2.9785	4.058e-06	22742
SA_caudalmiddlefrontal	rs1343190	T	C	13.3825	2.9292	4.907e-06	22742
SA_caudalmiddlefrontal	rs9574980	A	T	13.7578	2.9741	3.731e-06	22742
SA_caudalmiddlefrontal	rs2589227	T	C	13.9603	2.9436	2.111e-06	22742
SA_caudalmiddlefrontal	rs2246754	T	C	-13.8991	2.9328	2.146e-06	22742
SA_caudalmiddlefrontal	rs2246769	T	C	13.8845	2.9289	2.132e-06	22742
SA_caudalmiddlefrontal	15:96787018:A_AT	i	r	-14.41	3.0948	3.221e-06	20188
SA_caudalmiddlefrontal	rs2589256	T	G	-13.2495	2.8988	4.86e-06	22742
SA_caudalmiddlefrontal	rs2577013	T	G	13.2165	2.8893	4.779e-06	22742
SA_caudalmiddlefrontal	rs12598982	T	C	14.5745	2.4186	1.682e-09	22742
SA_caudalmiddlefrontal	rs12934308	A	G	-14.3899	2.4063	2.232e-09	22742
SA_caudalmiddlefrontal	rs7184835	T	C	-14.8043	2.4132	8.527e-10	22742
SA_caudalmiddlefrontal	rs9933638	A	G	-14.5078	2.391	1.298e-09	22742
SA_caudalmiddlefrontal	rs7186498	T	C	14.4732	2.4025	1.7e-09	22742
SA_caudalmiddlefrontal	rs9302556	A	C	14.5452	2.3871	1.106e-09	22742
SA_caudalmiddlefrontal	rs7190749	A	G	-14.532	2.4001	1.406e-09	22742
SA_caudalmiddlefrontal	rs1819860	A	G	-14.4897	2.3903	1.346e-09	22742
SA_caudalmiddlefrontal	rs12443621	A	G	-14.5248	2.3851	1.131e-09	22742
SA_caudalmiddlefrontal	rs9933556	T	C	14.4943	2.3858	1.239e-09	22742
SA_caudalmiddlefrontal	rs4538010	A	G	-14.5896	2.411	1.437e-09	22742
SA_caudalmiddlefrontal	rs1362546	T	C	14.5894	2.3857	9.639e-10	22742
SA_caudalmiddlefrontal	rs1075367	A	G	14.5702	2.3853	1.006e-09	22742
SA_caudalmiddlefrontal	rs8046979	A	G	-14.4669	2.3958	1.556e-09	22742
SA_caudalmiddlefrontal	rs1420529	T	G	-14.4097	2.3858	1.543e-09	22742
SA_caudalmiddlefrontal	rs1420530	T	C	14.4404	2.3877	1.468e-09	22742
SA_caudalmiddlefrontal	rs11642645	A	C	14.433	2.3843	1.418e-09	22742
SA_caudalmiddlefrontal	rs1420533	A	G	14.1402	2.3801	2.832e-09	22742
SA_caudalmiddlefrontal	rs1362547	T	C	-14.0859	2.3855	3.529e-09	22742
SA_caudalmiddlefrontal	rs7193453	T	C	14.3011	2.3838	1.982e-09	22742
SA_caudalmiddlefrontal	rs9926163	T	G	14.3183	2.3835	1.888e-09	22742
SA_caudalmiddlefrontal	rs2193094	T	G	-14.1921	2.3913	2.942e-09	22742
SA_caudalmiddlefrontal	rs4783780	A	C	-14.4593	2.3938	1.538e-09	22382
SA_caudalmiddlefrontal	rs3112581	A	G	-14.2682	2.3945	2.543e-09	22382
SA_caudalmiddlefrontal	rs3112580	T	C	-14.2855	2.3991	2.608e-09	22382
SA_caudalmiddlefrontal	rs9931232	A	G	14.4549	2.3945	1.574e-09	22382
SA_caudalmiddlefrontal	rs8052175	T	C	14.4205	2.3973	1.796e-09	22382
SA_caudalmiddlefrontal	rs1420535	A	C	14.4262	2.402	1.904e-09	22382
SA_caudalmiddlefrontal	rs1477074	T	C	-14.4791	2.4029	1.685e-09	22382
SA_caudalmiddlefrontal	rs8044585	A	C	14.4175	2.4567	4.393e-09	22382
SA_caudalmiddlefrontal	rs4784224	A	C	14.2194	2.4125	3.771e-09	22382
SA_caudalmiddlefrontal	rs3095601	T	G	14.595	2.4762	3.765e-09	22382
SA_caudalmiddlefrontal	rs3095605	A	G	-14.1336	2.4046	4.157e-09	22382
SA_caudalmiddlefrontal	rs3803660	A	G	-14.1187	2.4042	4.291e-09	22382
SA_caudalmiddlefrontal	rs4783161	T	G	-17.6076	3.7636	2.89e-06	19372
SA_caudalmiddlefrontal	rs4782698	T	C	-17.751	3.7636	2.4e-06	19372
SA_caudalmiddlefrontal	rs2326523	T	C	-17.7424	3.7822	2.718e-06	19832
SA_caudalmiddlefrontal	rs11149737	A	G	-17.0945	3.7083	4.03e-06	19832
SA_caudalmiddlefrontal	rs11642262	T	C	19.1923	4.0646	2.337e-06	19832
SA_caudalmiddlefrontal	rs9308342	T	C	11.8865	2.5582	3.377e-06	22550
SA_caudalmiddlefrontal	rs9308344	C	G	11.872	2.5558	3.397e-06	22550
SA_caudalmiddlefrontal	rs4843557	C	G	-11.7686	2.5502	3.935e-06	22550
SA_caudalmiddlefrontal	rs7205039	C	G	11.7542	2.5508	4.064e-06	22550
SA_caudalmiddlefrontal	rs12921714	A	C	11.7501	2.5496	4.055e-06	22550
SA_caudalmiddlefrontal	rs12921347	C	G	11.7427	2.5503	4.136e-06	22550
SA_caudalmiddlefrontal	rs10863183	T	C	-12.4135	2.688	3.873e-06	22550
SA_caudalmiddlefrontal	rs8766	T	C	11.2565	2.446	4.185e-06	22742
SA_caudalmiddlefrontal	rs8090085	T	G	11.3354	2.439	3.359e-06	22742
SA_caudalmiddlefrontal	rs60565673	T	G	12.1131	2.4549	8.044e-07	22742
SA_caudalmiddlefrontal	rs1261073	A	C	12.2209	2.4531	6.301e-07	22742
SA_caudalmiddlefrontal	rs1893431	A	G	-11.6268	2.4341	1.782e-06	22742
SA_caudalmiddlefrontal	rs1893430	A	G	11.5825	2.4337	1.943e-06	22742
SA_caudalmiddlefrontal	rs62092442	T	C	11.5732	2.4428	2.161e-06	22742
SA_caudalmiddlefrontal	rs11662842	C	G	11.8547	2.4905	1.936e-06	22742
SA_caudalmiddlefrontal	rs1261134	A	T	11.6902	2.4553	1.925e-06	22742
SA_caudalmiddlefrontal	rs1261114	A	G	-11.6871	2.4554	1.938e-06	22742
SA_caudalmiddlefrontal	rs1261118	T	C	-12	2.4698	1.182e-06	22742
SA_caudalmiddlefrontal	18:52953498:C_CTT	i	r	-13.4433	2.7853	1.389e-06	20188
SA_cuneus	rs7364475	T	C	-6.8483	1.4043	1.079e-06	22679
SA_cuneus	1:18968714:GT_G	d	r	-7.0178	1.4223	8.057e-07	22304
SA_cuneus	rs56675509	C	G	-6.9983	1.4048	6.306e-07	22679
SA_cuneus	rs9439713	A	G	-6.9402	1.3874	5.661e-07	22679
SA_cuneus	1:18972782_TTC_T	d	r	-7.1634	1.4416	6.723e-07	22304
SA_cuneus	1:18972786:CTG_C	d	r	-7.1603	1.5343	3.057e-06	20178
SA_cuneus	rs9439714	T	C	6.7608	1.3851	1.055e-06	22679
SA_cuneus	rs4920524	T	G	6.7512	1.3847	1.084e-06	22304
SA_cuneus	rs6659735	A	G	-7.2772	1.3806	1.357e-07	22521
SA_cuneus	rs56075776	A	G	-6.9607	1.3872	5.224e-07	22679
SA_cuneus	1:228194153_CGGCCGCAGGCAGACGG_C	d	r	-8.389	1.8276	4.428e-06	22005
SA_cuneus	rs10916258	A	C	-8.2383	1.6912	1.109e-06	22572
SA_cuneus	rs73092904	T	C	-8.5594	1.7105	5.614e-07	22572
SA_cuneus	rs3754356	C	G	-8.3399	1.6994	9.218e-07	22679
SA_cuneus	rs12029076	C	G	-8.3324	1.6993	9.413e-07	22679
SA_cuneus	rs12116745	C	G	7.2831	1.5514	2.674e-06	22679
SA_cuneus	2:225522048:GC_G	d	r	9.8231	2.0931	2.691e-06	18820
SA_cuneus	rs12637474	A	T	-6.8422	1.4546	2.551e-06	22679
SA_cuneus	rs79587725	A	G	-8.5716	1.8318	2.878e-06	22319
SA_cuneus	rs146346258	A	G	-8.3367	1.5578	8.712e-08	21944
SA_cuneus	rs139992503	A	G	8.3382	1.5577	8.65e-08	21944
SA_cuneus	rs4895120	T	C	-9.1271	1.3403	9.772e-12	22319
SA_cuneus	rs113141495	T	C	-9.0634	1.6605	4.807e-08	22319
SA_cuneus	rs11721304	T	C	-8.714	1.6176	7.159e-08	22319
SA_cuneus	rs2196494	T	C	-8.975	1.34	2.117e-11	22319
SA_cuneus	rs12695100	T	C	-8.9297	1.3336	2.141e-11	22319
SA_cuneus	rs6794834	T	C	8.9172	1.333	2.238e-11	22319
SA_cuneus	rs1540462	A	G	-8.8996	1.3319	2.359e-11	22319
SA_cuneus	rs1910326	T	C	-8.8588	1.3305	2.767e-11	22319
SA_cuneus	rs4895122	A	G	8.9262	1.6498	6.29e-08	22319
SA_cuneus	rs6780351	A	C	-8.7187	1.3324	6.007e-11	22319
SA_cuneus	rs12490814	T	C	-8.8042	1.3282	3.383e-11	22319
SA_cuneus	rs7649239	A	G	8.6909	1.3212	4.774e-11	22679
SA_cuneus	rs2043626	T	C	8.6751	1.3192	4.827e-11	22679
SA_cuneus	rs6808509	A	C	8.5957	1.3152	6.344e-11	22679
SA_cuneus	rs6773136	T	C	-8.5987	1.3154	6.283e-11	22679
SA_cuneus	rs6808909	A	G	8.5979	1.3154	6.308e-11	22679
SA_cuneus	rs2118003	A	C	8.6221	1.3154	5.581e-11	22679
SA_cuneus	rs2118004	T	C	8.6022	1.3154	6.16e-11	22679
SA_cuneus	rs11713472	A	G	-8.4159	1.3199	1.816e-10	22679
SA_cuneus	3:104657563	A	G	8.4016	1.7746	2.197e-06	19818
SA_cuneus	rs6783013	T	C	-8.5496	1.4658	5.453e-09	22319
SA_cuneus	rs9824417	T	C	8.5154	1.3217	1.175e-10	22304
SA_cuneus	rs76664757	A	T	-8.8645	1.6436	6.921e-08	22319
SA_cuneus	rs13077489	C	G	8.3408	1.5821	1.35e-07	22679
SA_cuneus	rs9829580	A	G	8.6051	1.3153	6.054e-11	22679
SA_cuneus	rs9868127	A	G	-8.6201	1.3153	5.604e-11	22679
SA_cuneus	3:104662316	A	C	8.3932	1.3618	7.121e-10	22146
SA_cuneus	rs13318870	T	C	8.6979	1.3203	4.461e-11	22521
SA_cuneus	rs77652765	A	G	8.8589	1.643	6.974e-08	22319
SA_cuneus	rs13320691	A	G	8.6635	1.3418	1.071e-10	22304
SA_cuneus	rs7618943	A	C	8.5902	1.316	6.688e-11	22679
SA_cuneus	rs1393740	A	C	8.9644	1.3213	1.164e-11	22521
SA_cuneus	rs1393741	A	G	8.636	1.3157	5.25e-11	22679
SA_cuneus	rs6792637	T	C	-8.2558	1.3349	6.235e-10	22679
SA_cuneus	rs6782467	T	C	8.5769	1.3149	6.894e-11	22679
SA_cuneus	rs6806605	A	C	-8.7925	1.315	2.29e-11	22679
SA_cuneus	rs13066237	T	C	7.4344	1.3317	2.368e-08	22679
SA_cuneus	rs12492893	T	G	-8.2343	1.3348	6.871e-10	22679
SA_cuneus	rs12374063	A	C	8.5767	1.3204	8.271e-11	22679
SA_cuneus	rs10933796	A	G	8.0968	1.3465	1.821e-09	22304
SA_cuneus	rs12374064	T	C	8.5067	1.3278	1.487e-10	22304
SA_cuneus	rs6807218	A	G	8.8516	1.644	7.272e-08	22319
SA_cuneus	rs12374067	A	G	8.6601	1.317	4.842e-11	22679
SA_cuneus	rs73187663	A	C	-8.2301	1.3472	1.003e-09	22304
SA_cuneus	rs73187665	T	C	8.4318	1.3378	2.925e-10	22304
SA_cuneus	rs13092127	A	G	-8.6602	1.3176	4.937e-11	22679
SA_cuneus	rs35266846	T	C	8.6519	1.3177	5.167e-11	22679
SA_cuneus	rs35569867	T	G	-8.876	1.318	1.646e-11	22679
SA_cuneus	rs9839056	A	G	8.6617	1.3175	4.888e-11	22679
SA_cuneus	rs9876402	A	G	-8.6616	1.3175	4.892e-11	22679
SA_cuneus	rs78309900	A	G	-8.3696	1.7952	3.13e-06	22319
SA_cuneus	rs6789712	T	G	8.3608	1.3412	4.555e-10	22319
SA_cuneus	rs1436337	T	C	8.6741	1.3177	4.61e-11	22679
SA_cuneus	rs7646958	T	C	-8.6967	1.3177	4.111e-11	22679
SA_cuneus	rs10804436	A	C	-7.5664	1.3381	1.563e-08	22319
SA_cuneus	rs1816547	T	G	8.6064	1.318	6.578e-11	22679
SA_cuneus	rs1393742	A	G	-8.5889	1.3187	7.365e-11	22679
SA_cuneus	rs1393743	A	C	-8.7934	1.3194	2.652e-11	22679
SA_cuneus	rs9860835	T	G	8.5855	1.3188	7.517e-11	22679
SA_cuneus	rs76521431	T	G	-8.7285	1.6405	1.034e-07	22319
SA_cuneus	rs1436336	A	T	-8.8001	1.6395	7.979e-08	22319
SA_cuneus	rs6788676	A	G	8.1381	1.3659	2.553e-09	22319
SA_cuneus	rs112113804	A	G	-8.8358	1.649	8.395e-08	22319
SA_cuneus	rs79003825	A	C	-9.2444	1.5874	5.762e-09	22319
SA_cuneus	rs7618202	A	G	-8.7283	1.3245	4.405e-11	22319
SA_cuneus	rs2062774	T	C	9.2316	1.587	5.995e-09	22319
SA_cuneus	rs9863836	T	C	-9.2233	1.5878	6.285e-09	22319
SA_cuneus	rs9863841	T	C	-9.1177	1.591	1e-08	22319
SA_cuneus	rs12639074	T	C	7.9501	1.3536	4.274e-09	22319
SA_cuneus	rs9830221	T	G	8.4233	1.4311	3.954e-09	21944
SA_cuneus	rs74546871	T	C	9.2241	1.5873	6.207e-09	22319
SA_cuneus	rs11915534	A	C	-8.1068	1.3863	4.985e-09	22319
SA_cuneus	rs9288795	T	C	-8.0746	1.3314	1.322e-09	22319
SA_cuneus	rs113677859	i	r	-9.0767	1.5942	1.244e-08	21944
SA_cuneus	rs7625683	T	C	9.2265	1.5866	6.059e-09	22319
SA_cuneus	rs9850952	A	G	9.2383	1.5864	5.762e-09	22319
SA_cuneus	rs4894893	T	C	-9.253	1.5852	5.313e-09	22319
SA_cuneus	rs4894894	T	C	8.1507	1.331	9.133e-10	22319
SA_cuneus	rs34044746	T	C	-8.1851	1.3311	7.787e-10	22319
SA_cuneus	rs13319705	T	C	-8.1549	1.4262	1.078e-08	22319
SA_cuneus	rs9846639	A	G	-9.1843	1.5841	6.723e-09	22319
SA_cuneus	rs13320037	T	G	8.1355	1.4257	1.153e-08	22319
SA_cuneus	rs9827968	A	G	8.7875	1.3278	3.641e-11	22319
SA_cuneus	rs79588215	T	C	9.1681	1.5841	7.148e-09	22319
SA_cuneus	rs1354281	A	G	-8.023	1.3359	1.903e-09	22319
SA_cuneus	rs9854793	A	G	-9.151	1.5836	7.526e-09	22319
SA_cuneus	rs9880189	T	C	8.0197	1.3255	1.447e-09	22679
SA_cuneus	rs28374795	A	G	9.1851	1.5916	7.876e-09	22679
SA_cuneus	rs6771251	T	C	-7.9051	1.3261	2.501e-09	22679
SA_cuneus	rs9846552	T	C	7.8955	1.3276	2.726e-09	22679
SA_cuneus	rs777988619	d	r	-8.9329	1.5983	2.285e-08	21728
SA_cuneus	3:104710909:T_TTC	i	r	-7.8508	1.4918	1.419e-07	19602
SA_cuneus	3:104710911	T	C	7.7297	1.6369	2.332e-06	19602
SA_cuneus	rs1818149	T	C	7.8342	1.333	4.172e-09	22679
SA_cuneus	rs1354280	A	G	7.8217	1.3388	5.146e-09	22103
SA_cuneus	rs9854000	T	C	-7.8567	1.3335	3.824e-09	22679
SA_cuneus	rs9808934	T	G	9.1255	1.5822	8.034e-09	22679
SA_cuneus	rs957485	T	C	-8.9584	1.5802	1.434e-08	22679
SA_cuneus	rs12495603	A	G	8.6751	1.3296	6.812e-11	22679
SA_cuneus	rs4894822	A	C	-7.4448	1.3457	3.16e-08	22103
SA_cuneus	3:104714183:GT_G	d	r	-8.8507	1.5891	2.553e-08	22304
SA_cuneus	rs9869633	A	G	-9.1262	1.5797	7.602e-09	22679
SA_cuneus	rs13327829	A	G	9.1828	1.5794	6.102e-09	22679
SA_cuneus	rs13324580	T	C	9.0728	1.5816	9.661e-09	22679
SA_cuneus	rs6769796	A	G	7.9674	1.3354	2.429e-09	22103
SA_cuneus	rs6769805	A	C	9.1739	1.58	6.39e-09	22679
SA_cuneus	rs59016227	T	G	-9.0158	1.5903	1.434e-08	22103
SA_cuneus	rs58911379	A	T	-8.9798	1.5763	1.222e-08	22679
SA_cuneus	rs13327531	T	C	7.9416	1.3349	2.694e-09	22103
SA_cuneus	rs6802022	A	G	-9.0558	1.5773	9.4e-09	22679
SA_cuneus	rs10222610	A	G	-9.0566	1.5771	9.328e-09	22679
SA_cuneus	rs10222621	T	C	-9.0718	1.5772	8.824e-09	22679
SA_cuneus	rs10222454	A	G	9.0337	1.5745	9.615e-09	22679
SA_cuneus	rs10222457	A	C	7.9071	1.3348	3.144e-09	22103
SA_cuneus	rs10222624	A	G	-8.4579	1.6992	6.436e-07	22103
SA_cuneus	rs72989330	T	G	-9.108	1.5788	7.981e-09	22679
SA_cuneus	3:104721472:AG_A	d	r	-8.6922	1.595	5.046e-08	20178
SA_cuneus	rs74283894	A	G	-7.9104	1.4316	3.287e-08	22304
SA_cuneus	rs72989332	T	C	-9.1165	1.5786	7.696e-09	22679
SA_cuneus	rs11929686	A	G	-7.5471	1.3264	1.271e-08	22679
SA_cuneus	rs6772884	A	C	9.1655	1.5901	8.209e-09	22679
SA_cuneus	rs6797921	A	G	-9.1207	1.5775	7.395e-09	22679
SA_cuneus	rs1393744	T	C	9.1722	1.5729	5.502e-09	22679
SA_cuneus	rs72989334	T	G	-9.3951	1.5671	2.031e-09	22679
SA_cuneus	rs9856782	A	C	9.137	1.5627	5.005e-09	22304
SA_cuneus	rs9839209	T	G	9.1585	1.5729	5.791e-09	22679
SA_cuneus	rs971551	T	C	-9.0294	1.5707	9.005e-09	22679
SA_cuneus	rs971550	A	T	8.1699	1.416	7.941e-09	22679
SA_cuneus	rs4894896	A	G	8.8047	1.5768	2.351e-08	22679
SA_cuneus	rs4894897	C	G	-8.24	1.685	1.008e-06	22679
SA_cuneus	rs72989338	T	C	-8.425	1.6912	6.307e-07	22679
SA_cuneus	rs6766074	C	G	-8.3469	1.6894	7.787e-07	22679
SA_cuneus	rs1604640	C	G	8.4065	1.6913	6.677e-07	22679
SA_cuneus	rs6769723	A	G	-8.3231	1.689	8.318e-07	22679
SA_cuneus	rs6796574	A	G	8.3194	1.6892	8.437e-07	22679
SA_cuneus	rs6785288	T	C	8.3187	1.6941	9.095e-07	22679
SA_cuneus	rs6772559	A	G	-6.8225	1.3364	3.307e-07	22679
SA_cuneus	3:104729489_AT_A	d	r	-8.104	1.6998	1.864e-06	22304
SA_cuneus	rs17386778	A	T	-6.7074	1.3365	5.203e-07	22679
SA_cuneus	rs9682035	T	G	6.8123	1.3361	3.422e-07	22679
SA_cuneus	rs9682661	A	G	6.6937	1.3416	6.053e-07	22679
SA_cuneus	rs9288796	A	G	-8.1914	1.6971	1.389e-06	22103
SA_cuneus	rs4894898	A	G	-8.2547	1.688	1.008e-06	22679
SA_cuneus	rs9838717	T	G	-8.0492	1.7047	2.338e-06	22679
SA_cuneus	rs9858732	A	T	-8.0298	1.705	2.484e-06	22679
SA_cuneus	rs72989342	T	G	8.076	1.7	2.028e-06	22679
SA_cuneus	rs28578901	T	C	8.0597	1.7051	2.281e-06	22679
SA_cuneus	rs16850758	T	C	8.0217	1.6999	2.372e-06	22679
SA_cuneus	rs16850761	A	G	8.0079	1.7001	2.474e-06	22679
SA_cuneus	rs16850762	T	C	7.8545	1.6985	3.758e-06	22679
SA_cuneus	rs16850763	A	G	8.0088	1.7001	2.466e-06	22679
SA_cuneus	rs28661692	A	G	-7.8525	1.6985	3.777e-06	22679
SA_cuneus	rs16850766	A	G	-8.0003	1.7	2.526e-06	22679
SA_cuneus	rs28564343	T	G	8.0346	1.7004	2.301e-06	22679
SA_cuneus	rs28421781	A	G	7.9121	1.6993	3.221e-06	22679
SA_cuneus	rs28551708	T	G	-8.4498	1.7855	2.218e-06	22679
SA_cuneus	rs28594489	T	C	-8.5695	1.7931	1.761e-06	22679
SA_cuneus	rs28423675	A	G	-8.0803	1.6999	2.001e-06	22679
SA_cuneus	rs7646614	A	G	8.0973	1.6999	1.903e-06	22679
SA_cuneus	rs6437554	A	G	8.0048	1.6973	2.402e-06	22679
SA_cuneus	rs34360357	T	G	6.6271	1.3347	6.86e-07	22679
SA_cuneus	rs17387070	A	G	-6.5867	1.3384	8.592e-07	22679
SA_cuneus	rs6781572	A	G	-8.0521	1.6977	2.106e-06	22679
SA_cuneus	rs73852547	T	C	-8.1187	1.7005	1.804e-06	22679
SA_cuneus	rs72989352	A	T	-7.9499	1.6993	2.89e-06	22679
SA_cuneus	rs76481720	A	G	8.1097	1.7058	1.993e-06	22679
SA_cuneus	rs60072080	A	G	-8.0968	1.7013	1.945e-06	22679
SA_cuneus	rs58205062	T	G	7.9959	1.6995	2.539e-06	22679
SA_cuneus	rs28735393	A	G	-8.093	1.7016	1.974e-06	22679
SA_cuneus	rs9857628	A	T	-8.0755	1.7017	2.079e-06	22679
SA_cuneus	rs6437555	A	G	-7.9756	1.6984	2.655e-06	22679
SA_cuneus	rs6437556	A	G	7.9885	1.699	2.578e-06	22679
SA_cuneus	rs9848945	T	G	-8.1978	1.7036	1.493e-06	22679
SA_cuneus	rs7626601	A	C	-8.2153	1.7033	1.413e-06	22679
SA_cuneus	rs9883825	A	G	-6.5418	1.3372	9.967e-07	22679
SA_cuneus	rs9288797	A	G	-8.145	1.7077	1.846e-06	22679
SA_cuneus	3:104745561:A_AC	i	r	-8.6535	1.8549	3.084e-06	20178
SA_cuneus	rs79873095	T	G	-8.1288	1.7082	1.949e-06	22679
SA_cuneus	rs9825019	A	G	-6.3788	1.3403	1.943e-06	22679
SA_cuneus	rs1503080	T	C	6.6708	1.3419	6.657e-07	22679
SA_cuneus	rs7340550	T	G	8.1182	1.7009	1.815e-06	22679
SA_cuneus	rs13319556	A	T	-7.7865	1.6978	4.513e-06	22679
SA_cuneus	rs13325696	A	G	-8.1459	1.6984	1.616e-06	22679
SA_cuneus	rs9834649	A	C	-7.7703	1.4172	4.183e-08	22679
SA_cuneus	3:104776532:GT_G	d	r	6.4241	1.3493	1.926e-06	22304
SA_cuneus	rs35112442	A	G	6.4284	1.3492	1.892e-06	22304
SA_cuneus	rs13095276	T	C	6.0242	1.3154	4.653e-06	22679
SA_cuneus	rs9814707	A	G	-7.9785	1.7037	2.826e-06	22679
SA_cuneus	rs79553445	A	C	8.4299	1.7528	1.514e-06	22679
SA_cuneus	rs9809567	A	C	8.4757	1.7529	1.33e-06	22679
SA_cuneus	rs2654247	A	G	-6.5268	1.322	7.934e-07	22679
SA_cuneus	rs1503075	T	C	-6.5828	1.3313	7.621e-07	22679
SA_cuneus	rs55642684	A	C	9.6492	2.1135	4.983e-06	22679
SA_cuneus	rs966856	A	G	9.4996	2.0411	3.253e-06	23055
SA_cuneus	rs966854	A	G	-9.4808	2.0458	3.584e-06	23055
SA_cuneus	rs2877317	C	G	9.4432	2.0456	3.904e-06	23055
SA_cuneus	5:33701265_CA_C	d	r	-9.6401	2.0563	2.759e-06	22680
SA_cuneus	rs2331243	T	C	9.4152	2.0454	4.163e-06	23055
SA_cuneus	rs6451018	A	C	-9.4099	2.0441	4.156e-06	23055
SA_cuneus	rs76685589	A	G	-9.4903	2.0451	3.477e-06	23055
SA_cuneus	rs1946263	A	T	-9.441	2.0449	3.895e-06	23055
SA_cuneus	rs1946261	T	C	-9.4532	2.045	3.79e-06	23055
SA_cuneus	rs74584068	A	G	-9.5244	2.045	3.203e-06	23055
SA_cuneus	rs7705604	T	G	-9.599	2.0404	2.545e-06	23055
SA_cuneus	rs7727220	C	G	-9.5296	2.0445	3.147e-06	23055
SA_cuneus	rs10054073	T	G	-9.5779	2.0444	2.799e-06	23055
SA_cuneus	rs765699031	d	r	9.8498	2.0548	1.639e-06	22680
SA_cuneus	rs7721240	A	C	-9.6029	2.0473	2.725e-06	23055
SA_cuneus	rs1423479	A	G	-10.0637	2.0708	1.175e-06	23055
SA_cuneus	rs7718949	A	G	-9.5957	2.0994	4.86e-06	23055
SA_cuneus	rs115136616	T	C	16.2936	3.316	8.942e-07	22679
SA_cuneus	rs73137117	A	T	14.6833	2.7755	1.221e-07	23055
SA_cuneus	rs17083315	A	C	-14.6439	2.7713	1.263e-07	23055
SA_cuneus	rs73137123	T	G	14.4527	2.7769	1.943e-07	23055
SA_cuneus	rs73137126	A	C	-14.6632	2.769	1.187e-07	23055
SA_cuneus	rs73137133	T	C	-14.4973	2.768	1.628e-07	23055
SA_cuneus	rs73137142	A	G	14.3315	2.763	2.137e-07	22695
SA_cuneus	rs57881693	T	C	-14.5904	2.7623	1.278e-07	22695
SA_cuneus	rs7729237	A	G	-14.486	2.749	1.367e-07	22695
SA_cuneus	rs7723944	A	G	14.5251	2.763	1.464e-07	22695
SA_cuneus	rs55736786	T	C	11.9555	2.3541	3.801e-07	22127
SA_cuneus	rs57046989	A	G	14.5472	2.764	1.417e-07	22695
SA_cuneus	rs113647342	T	C	-14.6503	2.7618	1.129e-07	22695
SA_cuneus	rs182780334	A	C	15.7063	3.1096	4.398e-07	22320
SA_cuneus	rs138759869	A	G	-14.8695	2.78	8.861e-08	22695
SA_cuneus	rs6868462	T	C	-15.4956	2.8925	8.458e-08	22320
SA_cuneus	rs6868481	T	C	-15.7513	3.0397	2.196e-07	22320
SA_cuneus	rs7730993	T	G	14.3299	2.7586	2.051e-07	22695
SA_cuneus	rs2119449	T	C	14.6933	2.7501	9.15e-08	22695
SA_cuneus	rs35147150	A	G	14.6509	2.7533	1.03e-07	22695
SA_cuneus	rs17083337	T	C	-14.8258	2.7518	7.135e-08	22695
SA_cuneus	rs10066088	T	G	-15.0919	2.7694	5.051e-08	22695
SA_cuneus	rs2344918	T	C	-14.7599	2.753	8.262e-08	22695
SA_cuneus	rs1372037	A	T	14.6965	2.7526	9.339e-08	22695
SA_cuneus	rs35361727	i	r	-13.6376	2.7139	5.03e-07	22320
SA_cuneus	rs7715555	A	G	-14.6708	2.7532	9.9e-08	22695
SA_cuneus	rs9314089	A	C	-14.8351	2.7561	7.339e-08	22695
SA_cuneus	rs9314090	A	T	-14.5016	2.7663	1.586e-07	22345
SA_cuneus	rs4242233	T	C	14.0452	2.7398	2.953e-07	22695
SA_cuneus	rs10866759	A	C	-14.7322	2.7581	9.22e-08	22695
SA_cuneus	rs140083818	A	G	17.1772	3.4177	5.008e-07	22319
SA_cuneus	rs2924375	A	C	14.5761	2.7572	1.247e-07	22695
SA_cuneus	rs2924377	A	T	-14.8868	2.7576	6.721e-08	22695
SA_cuneus	rs1869277	A	G	14.7295	2.7473	8.252e-08	22695
SA_cuneus	rs1031422	A	G	14.4326	2.7548	1.615e-07	22695
SA_cuneus	rs145120402	A	C	-17.0998	3.4253	5.971e-07	22319
SA_cuneus	rs4869203	T	C	15.0779	2.7743	5.485e-08	22695
SA_cuneus	rs4607342	T	C	14.6942	2.7529	9.41e-08	22695
SA_cuneus	rs4380636	A	G	14.7286	2.7556	9.046e-08	22695
SA_cuneus	rs116509069	A	G	15.8911	3.1459	4.387e-07	22319
SA_cuneus	rs10463183	T	C	12.9976	2.6431	8.759e-07	22320
SA_cuneus	rs6556835	A	G	13.1764	2.7084	1.144e-06	22320
SA_cuneus	rs6893023	A	G	14.102	2.7227	2.226e-07	22695
SA_cuneus	rs13172644	T	C	12.724	2.742	3.477e-06	22537
SA_cuneus	rs4869204	A	G	-15.1567	2.7727	4.591e-08	22695
SA_cuneus	rs7710880	A	C	-15.062	2.7756	5.746e-08	22695
SA_cuneus	rs1026280	C	G	14.3975	2.756	1.75e-07	22503
SA_cuneus	rs1026281	A	G	14.3031	2.7655	2.316e-07	22695
SA_cuneus	rs10514378	T	C	14.3189	2.755	2.021e-07	22503
SA_cuneus	rs6874223	A	C	-14.2843	2.7545	2.151e-07	22503
SA_cuneus	rs10066323	A	G	-14.4789	2.7523	1.435e-07	22503
SA_cuneus	rs1453002	A	G	-15.627	2.8972	6.9e-08	22695
SA_cuneus	rs9314091	T	C	13.0973	2.7841	2.547e-06	22503
SA_cuneus	rs11135399	A	G	-13.1066	2.7832	2.487e-06	22503
SA_cuneus	rs114742862	C	G	14.7366	3.205	4.266e-06	22695
SA_cuneus	rs6873825	A	G	-13.5633	2.8828	2.54e-06	22345
SA_cuneus	rs4869208	A	G	13.9383	2.9103	1.673e-06	22537
SA_cuneus	rs114072973	A	C	16.4142	3.5846	4.67e-06	22695
SA_cuneus	rs10076457	T	C	-13.9882	2.9121	1.559e-06	22537
SA_cuneus	rs141834426	C	G	16.8164	3.5675	2.431e-06	22695
SA_cuneus	rs13161203	T	C	-13.0926	2.8625	4.789e-06	22345
SA_cuneus	rs7733532	A	T	-14.1105	2.9191	1.339e-06	22537
SA_cuneus	rs114891177	T	C	16.4199	3.5872	4.71e-06	22695
SA_cuneus	rs2345364	A	T	13.1837	2.8707	4.38e-06	22345
SA_cuneus	5:93405822_GAT_G	d	r	-13.5629	2.9398	3.959e-06	22162
SA_cuneus	rs6894989	A	G	13.2938	2.864	3.455e-06	22503
SA_cuneus	rs244432	A	G	10.2985	2.1682	2.036e-06	22863
SA_cuneus	5:110108338_GA_G	d	r	10.6484	2.1975	1.262e-06	22488
SA_cuneus	rs244996	C	G	-10.0379	2.1922	4.675e-06	22863
SA_cuneus	rs13188188	T	C	-10.0635	2.1942	4.51e-06	22057
SA_cuneus	5:110137582:G_GT	i	r	10.6337	2.2286	1.829e-06	22488
SA_cuneus	rs11420625	i	r	-7.5884	1.5292	6.971e-07	22304
SA_cuneus	rs241424	A	G	-7.0363	1.3545	2.048e-07	22058
SA_cuneus	rs76470478	T	C	-18.5819	3.9976	3.348e-06	20864
SA_cuneus	rs117892760	T	C	-21.8056	4.439	9.004e-07	20635
SA_cuneus	rs75343521	T	C	-19.2563	4.1345	3.201e-06	21327
SA_cuneus	rs139214174	A	C	-19.9314	4.2006	2.086e-06	20393
SA_cuneus	rs74580701	A	G	24.1497	4.7719	4.174e-07	18850
SA_cuneus	rs190958130	C	G	24.9638	4.8643	2.866e-07	17777
SA_cuneus	rs79636188	T	C	23.9991	4.8759	8.566e-07	17777
SA_cuneus	rs76611955	A	T	24.0522	4.865	7.656e-07	17777
SA_cuneus	rs3852256	A	G	-7.9828	1.431	2.425e-08	22679
SA_cuneus	rs6951522	T	C	-7.8142	1.4079	2.853e-08	22679
SA_cuneus	rs17349860	T	C	8.2234	1.41	5.472e-09	22679
SA_cuneus	rs3852257	T	C	7.9567	1.406	1.522e-08	22679
SA_cuneus	7:18872351:G_GAT	i	r	8.8915	1.5971	2.587e-08	20178
SA_cuneus	rs34776880	i	r	8.7595	1.5698	2.405e-08	22304
SA_cuneus	rs7795433	A	G	-8.4252	1.3885	1.298e-09	22679
SA_cuneus	rs12540774	A	G	-8.0126	1.3928	8.767e-09	22679
SA_cuneus	rs2016515	T	G	-7.671	1.4404	1.005e-07	22679
SA_cuneus	rs13238389	A	C	8.1383	1.3893	4.693e-09	22679
SA_cuneus	rs957960	A	C	8.9079	1.3715	8.313e-11	22679
SA_cuneus	rs957958	A	G	-6.7225	1.3609	7.824e-07	22679
SA_cuneus	rs2073963	T	G	-7.1745	1.3536	1.155e-07	22679
SA_cuneus	rs2073964	A	G	6.8672	1.3716	5.535e-07	22679
SA_cuneus	rs2073965	T	C	-6.97	1.3518	2.522e-07	22679
SA_cuneus	rs12536836	T	C	8.7888	1.3697	1.393e-10	22679
SA_cuneus	rs6461385	T	G	-7.9051	1.4099	2.062e-08	22679
SA_cuneus	rs6461386	A	G	8.0481	1.4058	1.035e-08	22679
SA_cuneus	rs756853	A	G	-7.5929	1.3545	2.076e-08	22679
SA_cuneus	rs13245206	A	G	7.9538	1.3627	5.325e-09	22679
SA_cuneus	rs10230371	T	C	-6.7346	1.3375	4.775e-07	22679
SA_cuneus	rs12699994	T	C	7.2109	1.3739	1.533e-07	22679
SA_cuneus	rs2249817	A	G	-6.728	1.3407	5.213e-07	22679
SA_cuneus	7:18896986:GTA_G	d	r	7.9369	1.7028	3.146e-06	20178
SA_cuneus	rs71530654	A	G	-6.9691	1.3908	5.421e-07	22304
SA_cuneus	rs12699995	T	C	7.6817	1.3541	1.404e-08	22679
SA_cuneus	rs12699996	T	G	-7.913	1.3816	1.02e-08	21684
SA_cuneus	7:18897323:T_TAG	i	r	7.9883	1.458	4.282e-08	19183
SA_cuneus	rs7801037	A	C	8.0294	1.3537	3.006e-09	22679
SA_cuneus	rs6461387	A	G	8.4753	1.3556	4.047e-10	22679
SA_cuneus	rs67248060	T	C	7.9693	1.3649	5.265e-09	22679
SA_cuneus	rs756854	T	C	8.1717	1.3616	1.953e-09	22679
SA_cuneus	rs55761404	A	G	-7.8033	1.3818	1.632e-08	22679
SA_cuneus	rs34854568	A	G	8.4131	1.3674	7.615e-10	22679
SA_cuneus	rs12699998	A	G	-8.4773	1.3672	5.636e-10	22679
SA_cuneus	rs12699999	A	G	-8.2454	1.3762	2.083e-09	22679
SA_cuneus	rs12700000	T	C	-7.9627	1.413	1.745e-08	22679
SA_cuneus	rs12700002	T	C	-7.6371	1.3558	1.774e-08	22679
SA_cuneus	rs13242358	A	G	-7.2381	1.454	6.422e-07	22679
SA_cuneus	rs12700003	T	C	7.6242	1.3541	1.795e-08	22679
SA_cuneus	rs13242758	A	G	7.1658	1.3743	1.847e-07	22679
SA_cuneus	rs6461389	T	C	7.625	1.3825	3.48e-08	22679
SA_cuneus	rs12530943	C	G	-7.777	1.3848	1.953e-08	22679
SA_cuneus	rs12530969	C	G	-7.762	1.3842	2.054e-08	22679
SA_cuneus	rs12536081	A	C	-7.7199	1.3821	2.33e-08	22679
SA_cuneus	rs6973029	T	C	8.2568	1.3849	2.491e-09	22679
SA_cuneus	rs11761877	A	G	7.861	1.4567	6.8e-08	22679
SA_cuneus	rs6461390	A	G	-8.2569	1.3628	1.372e-09	22679
SA_cuneus	rs2028015	A	G	7.4714	1.4635	3.305e-07	22679
SA_cuneus	rs6951745	A	G	7.9261	1.3752	8.241e-09	22679
SA_cuneus	rs6461391	T	C	8.4329	1.3642	6.347e-10	22679
SA_cuneus	rs6461392	A	G	7.8936	1.3753	9.483e-09	22679
SA_cuneus	rs6461393	T	G	-7.7286	1.3852	2.413e-08	22679
SA_cuneus	7:18912890	C	G	-7.6376	1.3778	2.968e-08	22679
SA_cuneus	rs7794241	A	C	7.8119	1.3874	1.795e-08	22679
SA_cuneus	7:18913621:AATG_	d	r	9.5405	1.8373	2.071e-07	20178
SA_cuneus	rs2286213	C	G	-7.988	1.3925	9.678e-09	22679
SA_cuneus	rs10237149	A	G	8.7633	1.3742	1.806e-10	22679
SA_cuneus	rs10237366	C	G	8.7403	1.3729	1.934e-10	22679
SA_cuneus	rs10237280	T	C	8.7661	1.373	1.719e-10	22679
SA_cuneus	rs13233322	A	C	8.3716	1.3826	1.405e-09	22679
SA_cuneus	rs10486314	A	G	-8.3782	1.3838	1.407e-09	22679
SA_cuneus	rs10270210	T	C	-8.0122	1.3823	6.783e-09	22679
SA_cuneus	rs7782319	A	G	-8.2135	1.3852	3.041e-09	22679
SA_cuneus	rs17350355	A	G	8.0925	1.3676	3.275e-09	22679
SA_cuneus	rs9648246	T	C	9.0033	1.4558	6.236e-10	22679
SA_cuneus	rs3801159	T	C	6.578	1.4104	3.104e-06	22679
SA_cuneus	rs4724085	A	C	6.671	1.4123	2.319e-06	22679
SA_cuneus	rs2299148	A	G	-6.8814	1.418	1.217e-06	22679
SA_cuneus	rs17707224	C	G	-7.2719	1.4125	2.632e-07	22679
SA_cuneus	rs17707253	A	G	-6.8412	1.4246	1.569e-06	22679
SA_cuneus	rs2237430	T	C	7.1768	1.4215	4.444e-07	22679
SA_cuneus	rs118056586	C	G	-41.8877	9.0068	3.309e-06	16284
SA_cuneus	rs189945248	A	C	-46.2666	9.5021	1.121e-06	14876
SA_cuneus	rs117146684	A	G	41.2139	8.9663	4.296e-06	16625
SA_cuneus	rs4921581	A	G	-6.5868	1.4103	3.004e-06	22679
SA_cuneus	rs4922217	C	G	7.5657	1.6058	2.461e-06	22679
SA_cuneus	rs62499390	A	G	7.5032	1.6156	3.415e-06	22679
SA_cuneus	rs1476412	A	C	9.1389	1.9759	3.742e-06	22863
SA_cuneus	rs2311741	T	G	-9.7393	2.0008	1.13e-06	22863
SA_cuneus	10:133474985:GT_G	d	r	26.1226	5.6999	4.583e-06	19474
SA_cuneus	rs11022129	T	C	10.7892	1.7872	1.57e-09	18980
SA_cuneus	rs11022130	A	G	10.3765	1.7508	3.089e-09	19438
SA_cuneus	rs10765918	A	G	10.3739	1.7108	1.329e-09	18980
SA_cuneus	rs12417334	A	G	8.9194	1.5906	2.053e-08	19865
SA_cuneus	rs11022131	C	G	10.2171	1.746	4.869e-09	19438
SA_cuneus	rs11022132	T	C	9.1518	1.597	1e-08	19865
SA_cuneus	rs4606447	A	G	-7.5291	1.5272	8.225e-07	22679
SA_cuneus	rs76533702	T	C	-11.2132	2.3353	1.574e-06	21684
SA_cuneus	rs13448	T	C	7.5731	1.5067	5e-07	22679
SA_cuneus	rs9704782	T	G	-7.5217	1.52	7.483e-07	22679
SA_cuneus	11:46704682_AG_A	d	r	-10.1521	2.2068	4.217e-06	21570
SA_cuneus	rs12274785	T	C	7.1091	1.4736	1.406e-06	22679
SA_cuneus	rs57804402	T	C	6.8187	1.4574	2.885e-06	22679
SA_cuneus	rs4752929	A	G	6.6558	1.4555	4.811e-06	22679
SA_cuneus	rs11606709	A	G	-7.3683	1.5009	9.139e-07	22103
SA_cuneus	rs2282686	T	C	6.6732	1.4525	4.339e-06	22679
SA_cuneus	12:83536651:T_TG	i	r	29.0459	6.2212	3.029e-06	10903
SA_cuneus	12:123742692_TG_T	d	r	7.7953	1.6736	3.195e-06	20679
SA_cuneus	rs9739070	A	G	-7.9094	1.6893	2.84e-06	22192
SA_cuneus	rs4930718	A	G	9.7414	2.0126	1.296e-06	18508
SA_cuneus	13:80056765_AG_A	d	r	-6.2267	1.3475	3.819e-06	22304
SA_cuneus	rs11409451	i	r	-6.2051	1.3413	3.727e-06	22304
SA_cuneus	rs9545142	T	C	6.2567	1.3513	3.658e-06	22679
SA_cuneus	rs183400	T	C	-7.0536	1.3626	2.262e-07	22679
SA_cuneus	rs170239	T	C	-7.3455	1.3535	5.735e-08	22679
SA_cuneus	rs221325	T	G	6.6509	1.3368	6.515e-07	22679
SA_cuneus	rs468167	T	C	6.8553	1.3392	3.074e-07	22679
SA_cuneus	rs221326	T	G	-7.1299	1.3331	8.882e-08	22679
SA_cuneus	rs149142	T	C	6.5967	1.3568	1.162e-06	22679
SA_cuneus	rs10782438	T	C	6.605	1.3279	6.553e-07	22679
SA_cuneus	rs186347	T	G	-6.9493	1.3257	1.588e-07	22679
SA_cuneus	rs160460	A	G	6.9431	1.3443	2.404e-07	22679
SA_cuneus	rs160459	A	C	6.9455	1.3268	1.651e-07	22679
SA_cuneus	rs160458	T	C	6.9115	1.3386	2.425e-07	22679
SA_cuneus	rs17255290	A	T	8.7307	1.7718	8.322e-07	22679
SA_cuneus	rs4898978	A	C	-8.6367	1.8022	1.649e-06	22679
SA_cuneus	rs10498487	T	C	11.1112	1.9186	6.98e-09	22679
SA_cuneus	rs72724695	A	G	11.1156	1.9218	7.293e-09	22679
SA_cuneus	rs17833704	A	G	8.49	1.7823	1.902e-06	22679
SA_cuneus	rs72724697	T	C	11.1258	1.9391	9.605e-09	22679
SA_cuneus	rs72724702	A	C	-11.2323	1.9454	7.754e-09	22679
SA_cuneus	rs55643369	T	C	8.5533	1.8053	2.16e-06	22679
SA_cuneus	rs17255304	A	G	-11.707	1.9388	1.558e-09	22679
SA_cuneus	rs72726305	A	G	-11.7595	1.9392	1.326e-09	22679
SA_cuneus	rs17255311	T	C	-12.9269	1.9561	3.885e-11	22679
SA_cuneus	rs77168169	A	C	-13.6473	2.0086	1.087e-11	22679
SA_cuneus	rs4901898	C	G	-13.7903	2.013	7.361e-12	22679
SA_cuneus	rs56400494	i	r	-13.7698	2.0256	1.062e-11	22304
SA_cuneus	rs117461235	A	G	-13.0011	1.9843	5.683e-11	22679
SA_cuneus	rs78580207	A	T	14.3925	1.9941	5.292e-13	22679
SA_cuneus	rs10498489	T	G	14.3415	1.9943	6.413e-13	22679
SA_cuneus	rs17255332	C	G	-14.4083	1.994	4.974e-13	22679
SA_cuneus	rs78032956	T	C	-14.4351	1.9931	4.408e-13	22679
SA_cuneus	rs79676525	A	T	14.4078	1.9936	4.932e-13	22679
SA_cuneus	rs4901902	A	C	14.5932	1.987	2.07e-13	22679
SA_cuneus	rs8005394	C	G	14.4858	1.9784	2.444e-13	22679
SA_cuneus	rs142965864	i	r	-14.1853	1.9974	1.231e-12	22304
SA_cuneus	rs17833752	A	G	14.6098	1.9885	2.024e-13	22679
SA_cuneus	rs4901904	T	C	-14.5443	1.993	2.926e-13	22679
SA_cuneus	rs11158250	A	G	10.7935	1.6566	7.248e-11	22679
SA_cuneus	rs73313052	A	G	-15.653	1.9856	3.185e-15	22679
SA_cuneus	14:59627434_AC_A	d	r	-15.3498	1.9983	1.572e-14	22304
SA_cuneus	rs2164950	A	G	-15.5751	1.9915	5.252e-15	22679
SA_cuneus	rs74826997	T	C	15.6385	1.9928	4.242e-15	22679
SA_cuneus	rs76341705	A	G	-15.6173	1.9934	4.702e-15	22679
SA_cuneus	rs2053300	T	G	7.0302	1.3486	1.858e-07	22679
SA_cuneus	rs2053299	T	G	-7.1078	1.3788	2.534e-07	22304
SA_cuneus	14:59631074:AGTT_	d	r	-15.6851	2.1026	8.67e-14	20178
SA_cuneus	14:59631075:GTTGT	d	r	-15.5275	2.0033	9.107e-15	22304
SA_cuneus	14:59631658:A_AC	i	r	-15.6609	2.1069	1.059e-13	20178
SA_cuneus	rs1252914	T	C	8.736	1.4356	1.162e-09	22679
SA_cuneus	rs79814107	A	G	14.6984	1.9965	1.81e-13	22679
SA_cuneus	rs113269922	A	G	14.7112	1.9963	1.715e-13	22679
SA_cuneus	rs56115079	T	G	14.5134	1.9942	3.397e-13	22679
SA_cuneus	rs112195026	A	G	14.4768	1.9935	3.812e-13	22679
SA_cuneus	rs76850797	T	C	14.3667	1.9928	5.622e-13	22679
SA_cuneus	rs17095819	A	G	12.7858	1.8117	1.695e-12	22679
SA_cuneus	rs78349529	A	G	14.4353	1.9917	4.234e-13	22679
SA_cuneus	rs28673301	T	C	12.6293	1.7919	1.817e-12	22679
SA_cuneus	rs893516	T	C	8.8509	1.4246	5.2e-10	22679
SA_cuneus	rs1438521	T	C	12.5791	1.7892	2.057e-12	22679
SA_cuneus	rs5809020	i	r	-8.8579	1.4332	6.381e-10	22304
SA_cuneus	rs4901906	T	C	-14.2418	1.9882	7.88e-13	22679
SA_cuneus	rs79360654	A	C	-13.9929	1.993	2.203e-12	22679
SA_cuneus	rs77618329	T	C	-14.0071	1.9941	2.152e-12	22679
SA_cuneus	14:59660769:G_GT	i	r	-13.7891	2.002	5.675e-12	22304
SA_cuneus	rs76256424	C	G	13.8995	1.9929	3.07e-12	22679
SA_cuneus	rs76674533	T	C	-13.882	1.9926	3.244e-12	22679
SA_cuneus	rs143720575	A	G	-15.2773	2.0735	1.732e-13	22679
SA_cuneus	rs1252992	A	G	6.0552	1.3234	4.749e-06	22679
SA_cuneus	rs78419480	C	G	15.3597	2.0314	3.996e-14	22679
SA_cuneus	rs75255901	T	C	-13.6742	1.9568	2.789e-12	22679
SA_cuneus	rs76787422	T	C	-13.7584	1.9574	2.08e-12	22679
SA_cuneus	rs17255395	T	C	-13.7247	1.9593	2.473e-12	22679
SA_cuneus	rs55649771	A	G	-14.023	1.9843	1.585e-12	22679
SA_cuneus	rs17255402	A	G	-12.5601	2.2855	3.893e-08	22679
SA_cuneus	rs77652087	A	C	12.5762	2.2849	3.71e-08	22679
SA_cuneus	rs79530766	A	G	-12.5638	2.2844	3.802e-08	22679
SA_cuneus	rs76957852	T	C	12.4189	2.2842	5.42e-08	22679
SA_cuneus	rs76558755	T	C	-12.404	2.2844	5.638e-08	22679
SA_cuneus	rs33996693	d	r	-12.01	2.3956	5.347e-07	20178
SA_cuneus	rs77216140	T	G	12.3406	2.2815	6.336e-08	22679
SA_cuneus	rs79009632	T	C	12.4253	2.2806	5.085e-08	22679
SA_cuneus	rs75841771	A	T	12.4193	2.2807	5.168e-08	22679
SA_cuneus	rs17833798	A	G	12.2694	2.2799	7.388e-08	22679
SA_cuneus	rs112839082	A	G	-12.2219	2.2794	8.239e-08	22679
SA_cuneus	rs111608226	A	G	-12.1591	2.2779	9.403e-08	22679
SA_cuneus	14:59684858:AG_A	d	r	-13.1699	2.5738	3.106e-07	20178
SA_cuneus	rs74874233	A	G	-13.3685	2.4362	4.077e-08	22679
SA_cuneus	rs77645702	T	G	12.1464	2.2772	9.612e-08	22679
SA_cuneus	rs77773396	A	C	-12.2282	2.2766	7.819e-08	22679
SA_cuneus	rs721069	A	G	12.0589	2.2742	1.142e-07	22679
SA_cuneus	rs79059243	A	G	12.136	2.276	9.709e-08	22679
SA_cuneus	rs113971277	T	C	12.1191	2.2763	1.014e-07	22679
SA_cuneus	rs2099637	A	C	-12.1124	2.2763	1.032e-07	22679
SA_cuneus	rs193213546	T	G	12.1579	2.3229	1.659e-07	22304
SA_cuneus	rs185579016	T	G	12.1589	2.3229	1.655e-07	22304
SA_cuneus	rs186569587	T	G	12.1612	2.3228	1.645e-07	22304
SA_cuneus	rs191351001	T	G	12.1583	2.3228	1.655e-07	22304
SA_cuneus	rs76786981	A	T	-12.0887	2.2757	1.084e-07	22679
SA_cuneus	rs17255423	C	G	-12.1039	2.2754	1.041e-07	22679
SA_cuneus	rs61986025	T	C	-11.831	2.201	7.649e-08	22679
SA_cuneus	rs61986026	T	C	-11.7623	2.201	9.083e-08	22679
SA_cuneus	rs17095915	C	G	-11.7936	2.199	8.18e-08	22679
SA_cuneus	rs61986027	A	G	11.7958	2.1991	8.144e-08	22679
SA_cuneus	rs17095918	T	C	-11.8102	2.1985	7.787e-08	22679
SA_cuneus	rs17095928	C	G	-11.8297	2.1985	7.417e-08	22679
SA_cuneus	rs144053467	A	G	11.814	2.2016	8.048e-08	22679
SA_cuneus	rs147327353	C	G	11.8106	2.2016	8.118e-08	22679
SA_cuneus	rs61986028	T	C	-13.4986	2.2607	2.356e-09	22679
SA_cuneus	rs17093312	T	G	-13.2817	2.2643	4.472e-09	22679
SA_cuneus	rs17095939	C	G	13.2802	2.2643	4.488e-09	22679
SA_cuneus	rs17095949	A	G	13.2742	2.2642	4.553e-09	22679
SA_cuneus	rs17095951	A	G	-13.2678	2.264	4.619e-09	22679
SA_cuneus	rs17095960	A	G	-13.2192	2.2631	5.185e-09	22679
SA_cuneus	rs61986029	C	G	13.302	2.2635	4.184e-09	22679
SA_cuneus	rs17095972	A	G	13.1799	2.2627	5.715e-09	22679
SA_cuneus	rs61986030	T	C	-13.2725	2.2633	4.511e-09	22679
SA_cuneus	rs61986031	T	C	-13.2795	2.2635	4.442e-09	22679
SA_cuneus	rs17095974	T	C	-13.2719	2.2635	4.535e-09	22679
SA_cuneus	14:59731356:TC_T	d	r	-12.2983	2.3193	1.142e-07	20178
SA_cuneus	rs187348535	T	C	12.3863	2.2262	2.639e-08	22304
SA_cuneus	rs17833876	T	C	12.7602	2.2127	8.078e-09	22679
SA_cuneus	rs17255500	T	C	12.7492	2.2129	8.342e-09	22679
SA_cuneus	rs17255507	A	G	12.7756	2.212	7.663e-09	22679
SA_cuneus	rs17255514	A	T	12.7778	2.2119	7.613e-09	22679
SA_cuneus	rs61986048	A	G	-12.7645	2.2117	7.863e-09	22679
SA_cuneus	rs17255520	A	C	-12.7677	2.2126	7.903e-09	22679
SA_cuneus	rs17095989	A	G	-12.3744	2.2044	1.983e-08	22679
SA_cuneus	rs17093314	A	G	-12.3941	2.2039	1.869e-08	22679
SA_cuneus	rs17095990	A	G	-12.5723	2.2079	1.24e-08	22679
SA_cuneus	rs61986049	A	G	-12.7694	2.212	7.804e-09	22679
SA_cuneus	rs17833888	A	G	12.7884	2.2124	7.451e-09	22679
SA_cuneus	rs79869391	A	G	12.7946	2.2124	7.335e-09	22679
SA_cuneus	rs17255527	A	T	12.757	2.2135	8.248e-09	22679
SA_cuneus	rs111977890	A	G	-12.7849	2.214	7.716e-09	22679
SA_cuneus	rs61986052	C	G	-12.7967	2.2143	7.505e-09	22679
SA_cuneus	rs17255534	T	C	-12.7872	2.2147	7.75e-09	22679
SA_cuneus	rs2033795	A	G	-12.8058	2.215	7.413e-09	22679
SA_cuneus	rs4296184	T	G	-12.7959	2.2161	7.737e-09	22679
SA_cuneus	rs61986054	A	T	-12.7897	2.2153	7.766e-09	22679
SA_cuneus	rs61986055	T	C	12.7952	2.2148	7.599e-09	22679
SA_cuneus	rs61986056	A	G	-12.7907	2.2152	7.734e-09	22679
SA_cuneus	rs78270394	A	G	12.7889	2.2153	7.782e-09	22679
SA_cuneus	rs75555742	A	G	-12.5555	2.2128	1.394e-08	22679
SA_cuneus	rs61986057	T	C	-10.6092	2.0221	1.548e-07	22679
SA_cuneus	rs75313266	A	G	-12.4753	2.2256	2.079e-08	22304
SA_cuneus	14:59755632_TTTG_T	d	r	-12.4713	2.2257	2.103e-08	22304
SA_cuneus	rs61986058	A	C	12.794	2.216	7.767e-09	22679
SA_cuneus	14:59758310	T	G	-12.8115	2.2158	7.388e-09	22679
SA_cuneus	rs74748336	A	G	-12.8	2.2161	7.651e-09	22679
SA_cuneus	rs78271461	A	C	-12.8008	2.2161	7.633e-09	22679
SA_cuneus	rs17255548	A	G	12.8036	2.2161	7.576e-09	22679
SA_cuneus	rs10483711	T	C	-13.3583	2.2645	3.654e-09	22679
SA_cuneus	rs10483713	T	C	12.837	2.2161	6.932e-09	22679
SA_cuneus	14:59763691:AGAGT	d	r	-12.523	2.2262	1.853e-08	22304
SA_cuneus	rs17255583	T	C	-12.8418	2.2162	6.851e-09	22679
SA_cuneus	rs61984460	T	C	12.85	2.2163	6.71e-09	22679
SA_cuneus	rs61984461	A	G	12.8507	2.2163	6.699e-09	22679
SA_cuneus	rs17833930	A	G	-12.8486	2.2167	6.784e-09	22679
SA_cuneus	rs139473885	i	r	-12.5363	2.2268	1.805e-08	22304
SA_cuneus	rs17833942	A	G	12.8546	2.2168	6.68e-09	22679
SA_cuneus	rs76990548	A	G	-13.4136	2.2654	3.199e-09	22679
SA_cuneus	rs17096046	T	C	13.3263	2.2612	3.784e-09	22679
SA_cuneus	rs17096048	A	G	-13.4396	2.2654	2.983e-09	22679
SA_cuneus	rs61984462	T	C	-13.4485	2.2655	2.918e-09	22679
SA_cuneus	rs78212084	A	G	-13.4497	2.2656	2.911e-09	22679
SA_cuneus	rs61984463	A	G	12.9111	2.2163	5.694e-09	22679
SA_cuneus	rs75663630	A	C	-13.4646	2.2656	2.8e-09	22679
SA_cuneus	rs17096053	T	C	13.4687	2.2653	2.753e-09	22679
SA_cuneus	rs17096056	T	C	-13.504	2.266	2.531e-09	22679
SA_cuneus	rs61984464	T	C	13.5931	2.2658	1.983e-09	22679
SA_cuneus	rs17255610	A	G	-12.9072	2.2175	5.866e-09	22679
SA_cuneus	rs199658979	i	r	-13.0179	2.3456	2.86e-08	22304
SA_cuneus	rs61984489	A	G	13.0005	2.2149	4.367e-09	22679
SA_cuneus	rs17096066	T	C	-13.5761	2.2617	1.943e-09	22679
SA_cuneus	rs10483714	A	G	12.9513	2.2136	4.892e-09	22679
SA_cuneus	rs61984493	C	G	-12.938	2.2135	5.064e-09	22679
SA_cuneus	rs78626699	A	T	-12.8141	2.2095	6.654e-09	22679
SA_cuneus	rs45610932	C	G	-12.8615	2.2155	6.427e-09	22679
SA_cuneus	rs17096074	T	G	-13.3988	2.2618	3.142e-09	22679
SA_cuneus	rs17096077	A	T	-13.3879	2.2617	3.23e-09	22679
SA_cuneus	rs61984494	T	C	-13.3637	2.2614	3.43e-09	22679
SA_cuneus	rs17096084	A	G	13.4127	2.2587	2.88e-09	22679
SA_cuneus	rs41285510	A	G	-12.8512	2.2154	6.593e-09	22679
SA_cuneus	rs28927674	A	G	-12.7406	2.2147	8.776e-09	22679
SA_cuneus	rs17096107	C	G	-13.365	2.2623	3.467e-09	22679
SA_cuneus	rs61984497	A	G	9.5133	2.0425	3.198e-06	22679
SA_cuneus	rs17096117	C	G	13.3317	2.2707	4.325e-09	22679
SA_cuneus	rs75341124	T	C	-17.6668	3.8574	4.651e-06	22679
SA_cuneus	rs17096126	T	G	13.2692	2.2868	6.533e-09	22679
SA_cuneus	14:59810206_CT_C	d	r	-13.3872	2.7334	9.696e-07	22304
SA_cuneus	rs61984498	A	G	10.4584	2.2021	2.041e-06	22679
SA_cuneus	rs61984499	A	G	10.7949	2.2745	2.074e-06	22679
SA_cuneus	rs17834014	A	G	11.1656	2.2952	1.147e-06	22679
SA_cuneus	rs61984520	C	G	11.2796	2.2969	9.073e-07	22679
SA_cuneus	rs61984521	T	C	-11.0907	2.3007	1.431e-06	22679
SA_cuneus	rs61984524	C	G	11.0515	2.2972	1.503e-06	22679
SA_cuneus	14:59826664_CA_C	d	r	-10.6028	2.3088	4.383e-06	22304
SA_cuneus	rs61984526	T	C	10.9569	2.316	2.234e-06	22679
SA_cuneus	rs41285512	A	C	11.3114	2.3585	1.618e-06	21322
SA_cuneus	rs45476291	A	G	11.352	2.2924	7.344e-07	23055
SA_cuneus	rs61984529	T	G	-11.0886	2.2969	1.382e-06	23055
SA_cuneus	rs61984530	A	G	11.281	2.2989	9.241e-07	23055
SA_cuneus	rs75061529	A	C	-11.3038	2.3039	9.274e-07	23055
SA_cuneus	rs61984532	A	G	-11.3212	2.303	8.842e-07	23055
SA_cuneus	rs61984533	T	C	11.4594	2.3037	6.55e-07	23055
SA_cuneus	rs61984534	T	C	-11.2847	2.3033	9.616e-07	23055
SA_cuneus	rs12590921	A	C	6.116	1.3309	4.323e-06	22679
SA_cuneus	rs61984535	T	C	-11.3598	2.3042	8.226e-07	23055
SA_cuneus	rs61984536	T	C	-11.426	2.3068	7.297e-07	23055
SA_cuneus	rs61984537	T	C	11.0698	2.2922	1.37e-06	23055
SA_cuneus	rs78084529	C	G	-11.2913	2.3531	1.599e-06	23055
SA_cuneus	rs79863915	T	G	-11.2793	2.3533	1.643e-06	23055
SA_cuneus	rs61984538	T	C	10.8108	2.2803	2.126e-06	23055
SA_cuneus	rs61984539	T	C	-10.7763	2.2813	2.315e-06	23055
SA_cuneus	rs7151357	A	C	-11.117	2.3178	1.616e-06	23055
SA_cuneus	rs73299984	T	C	10.8267	2.2826	2.104e-06	23055
SA_cuneus	rs4127823	T	C	-6.1162	1.3329	4.46e-06	22679
SA_cuneus	rs61984545	A	G	-11.2963	2.3125	1.035e-06	23055
SA_cuneus	rs3850302	T	C	-6.1756	1.3337	3.651e-06	22679
SA_cuneus	rs80264941	T	C	11.5143	2.3089	6.133e-07	23055
SA_cuneus	14:59858038_CT_C	d	r	-11.1802	2.3207	1.453e-06	22680
SA_cuneus	rs112171060	A	G	11.5656	2.3119	5.654e-07	23055
SA_cuneus	rs61985462	T	C	11.5576	2.3139	5.887e-07	23055
SA_cuneus	14:59859270_GC_G	d	r	-10.5454	2.2995	4.52e-06	22680
SA_cuneus	rs113855394	T	C	11.7479	2.3158	3.916e-07	23055
SA_cuneus	rs61985463	T	C	-11.6589	2.3178	4.9e-07	23055
SA_cuneus	rs61985464	T	C	11.6508	2.3178	4.99e-07	23055
SA_cuneus	rs61985465	A	G	-11.9039	2.593	4.417e-06	23055
SA_cuneus	rs1004739	A	G	10.2324	2.2311	4.514e-06	22679
SA_cuneus	rs1004740	T	C	10.2905	2.2346	4.121e-06	22679
SA_cuneus	rs1004741	C	G	-10.3316	2.2336	3.735e-06	22679
SA_cuneus	rs2412410	T	C	10.3348	2.2336	3.71e-06	22679
SA_cuneus	rs76952462	T	C	10.4854	2.2569	3.384e-06	22679
SA_cuneus	rs56722485	A	G	10.3295	2.2338	3.759e-06	22679
SA_cuneus	rs57969006	T	C	-10.4327	2.2458	3.393e-06	22304
SA_cuneus	rs2412411	T	G	-10.3359	2.2334	3.693e-06	22679
SA_cuneus	rs16969460	T	C	-10.377	2.2329	3.364e-06	22679
SA_cuneus	rs11631570	T	C	-10.7855	2.2905	2.491e-06	22679
SA_cuneus	rs58332880	A	G	-10.5691	2.2987	4.268e-06	22679
SA_cuneus	rs9926342	T	C	10.909	2.2016	7.235e-07	22679
SA_cuneus	rs9935933	A	G	10.8887	2.1992	7.373e-07	22679
SA_cuneus	rs9921713	C	G	-10.8326	2.1973	8.226e-07	22679
SA_cuneus	rs28662888	A	C	-10.9491	2.2048	6.831e-07	22679
SA_cuneus	rs9926978	A	T	10.8523	2.1971	7.835e-07	22679
SA_cuneus	rs8045488	A	G	-10.9137	2.2041	7.361e-07	22679
SA_cuneus	rs78842967	T	G	10.8168	2.1959	8.399e-07	22679
SA_cuneus	rs72789205	A	G	-10.8703	2.2125	8.958e-07	22679
SA_cuneus	rs72789208	A	G	-10.8019	2.2041	9.54e-07	22679
SA_cuneus	rs72789209	C	G	10.8037	2.204	9.499e-07	22679
SA_cuneus	rs72789210	T	C	-10.8051	2.2041	9.477e-07	22679
SA_cuneus	rs113730633	T	G	10.325	2.1844	2.282e-06	22679
SA_cuneus	rs138826915	T	C	10.8136	2.204	9.28e-07	22679
SA_cuneus	rs111940336	T	C	-10.8161	2.204	9.223e-07	22679
SA_cuneus	rs72789213	T	C	-10.6038	2.1939	1.343e-06	22679
SA_cuneus	rs72789214	A	C	10.8112	2.2034	9.267e-07	22679
SA_cuneus	rs72789215	C	G	-10.8113	2.2032	9.249e-07	22679
SA_cuneus	rs72789217	A	G	10.8249	2.2032	8.962e-07	22679
SA_cuneus	rs60762594	T	C	10.8365	2.2012	8.525e-07	22679
SA_cuneus	rs56859259	T	C	10.8225	2.2009	8.778e-07	22679
SA_cuneus	rs16958594	A	G	10.7951	2.2001	9.266e-07	22679
SA_cuneus	rs72789222	A	C	10.795	2.1997	9.23e-07	22679
SA_cuneus	rs7498201	A	G	10.8084	2.2004	9.013e-07	22679
SA_cuneus	rs72789223	A	G	11.0699	2.1921	4.418e-07	22679
SA_cuneus	rs80174452	A	G	-11.0445	2.1922	4.703e-07	22679
SA_cuneus	rs16958605	A	G	11.0854	2.1928	4.295e-07	22679
SA_cuneus	rs9939748	T	C	-10.5156	2.1723	1.293e-06	22679
SA_cuneus	rs72789226	A	G	11.0944	2.1931	4.221e-07	22679
SA_cuneus	16:69108757:TA_T	d	r	-11.0471	2.314	1.806e-06	20178
SA_cuneus	rs55829992	A	C	11.1041	2.1934	4.139e-07	22679
SA_cuneus	rs2872083	T	C	-11.1054	2.1936	4.136e-07	22679
SA_cuneus	rs2312582	A	G	-11.1058	2.1936	4.132e-07	22679
SA_cuneus	rs56391098	A	G	-11.1066	2.1936	4.124e-07	22679
SA_cuneus	rs72789227	A	G	-10.937	2.2491	1.157e-06	22679
SA_cuneus	rs9674296	T	C	-10.786	2.251	1.654e-06	22679
SA_cuneus	rs201638295	i	r	-10.3137	2.244	4.304e-06	22304
SA_cuneus	rs16958638	C	G	10.7888	2.2241	1.229e-06	22679
SA_cuneus	16:69135687:TAC_T	d	r	-11.9281	2.5066	1.948e-06	20178
SA_cuneus	16:69135688_ACT_A	d	r	-11.205	2.3841	2.604e-06	20178
SA_cuneus	rs4796395	T	C	-7.2935	1.5274	1.796e-06	22114
SA_cuneus	rs4796396	C	G	-7.3545	1.5463	1.974e-06	22114
SA_cuneus	rs7502613	T	C	-7.5247	1.5207	7.488e-07	22114
SA_cuneus	rs7502384	C	G	7.4185	1.5743	2.452e-06	21922
SA_cuneus	rs11650082	A	G	7.2569	1.5202	1.808e-06	22114
SA_cuneus	rs7502836	A	T	-7.52	1.5179	7.264e-07	22114
SA_cuneus	rs12949545	T	G	6.7601	1.4768	4.707e-06	22114
SA_cuneus	rs7211258	T	G	-7.0016	1.4796	2.221e-06	22114
SA_cuneus	rs12150317	T	C	7.0164	1.4566	1.458e-06	21739
SA_cuneus	rs4796397	T	C	-6.8835	1.4092	1.036e-06	21739
SA_cuneus	rs7503161	A	C	-6.2789	1.3569	3.706e-06	22114
SA_cuneus	rs4796398	T	C	6.2789	1.3505	3.33e-06	22114
SA_cuneus	rs28636077	A	G	6.2814	1.3514	3.348e-06	22114
SA_cuneus	rs7220464	T	G	-6.6518	1.3891	1.678e-06	22114
SA_cuneus	rs11658072	T	C	6.4661	1.3904	3.314e-06	22114
SA_cuneus	rs7214750	T	C	-12.8055	2.6051	8.85e-07	23055
SA_cuneus	rs143442432	i	r	-12.9564	2.6171	7.399e-07	22680
SA_cuneus	rs11652557	A	G	-12.7408	2.5903	8.714e-07	23055
SA_cuneus	rs1420791	A	G	12.6874	2.5788	8.655e-07	23055
SA_cuneus	rs76731691	T	G	-12.7547	2.7519	3.573e-06	22679
SA_entorhinal	1:178733290:GGT_G	d	r	2.8361	0.6107	3.414e-06	20281
SA_entorhinal	1:178770951_AAGGG_A	d	r	2.7825	0.6023	3.845e-06	20892
SA_entorhinal	rs28372846	i	r	2.8242	0.6158	4.51e-06	20892
SA_entorhinal	2:217424829	A	C	-3.9175	0.8484	3.879e-06	16951
SA_entorhinal	rs9714592	A	G	-3.8831	0.8446	4.279e-06	20467
SA_entorhinal	rs59846446	T	G	3.9545	0.8326	2.036e-06	19476
SA_entorhinal	rs6845510	T	C	3.7107	0.7995	3.461e-06	20848
SA_entorhinal	rs13157759	A	T	3.3072	0.7232	4.809e-06	20842
SA_entorhinal	rs10043971	T	C	3.2683	0.7153	4.902e-06	20892
SA_entorhinal	rs11746026	A	C	-3.0005	0.6226	1.443e-06	21273
SA_entorhinal	rs10071339	C	G	-2.8602	0.6172	3.59e-06	21273
SA_entorhinal	rs6870503	T	C	2.9993	0.6516	4.167e-06	21273
SA_entorhinal	rs931620	T	C	-3.0295	0.6475	2.883e-06	21273
SA_entorhinal	rs55968606	T	C	3.3285	0.7082	2.601e-06	20892
SA_entorhinal	rs78149372	T	G	3.0027	0.6476	3.548e-06	21273
SA_entorhinal	rs6892061	T	C	-3.0037	0.6478	3.544e-06	21273
SA_entorhinal	rs10464052	C	G	3.0394	0.6478	2.708e-06	21273
SA_entorhinal	rs28869534	T	C	3.0187	0.6505	3.47e-06	21273
SA_entorhinal	rs189585793	A	G	-3.2924	0.7146	4.082e-06	20892
SA_entorhinal	rs144735950	A	G	3.0509	0.6534	3.025e-06	20892
SA_entorhinal	rs111901854	T	G	-3.8903	0.8336	3.06e-06	20892
SA_entorhinal	rs1044209	A	T	-3.251	0.7061	4.137e-06	21273
SA_entorhinal	rs1044205	T	C	3.2568	0.7044	3.778e-06	21273
SA_entorhinal	rs1863918	T	G	3.0458	0.6471	2.513e-06	21273
SA_entorhinal	rs1054480	A	G	3.0378	0.6479	2.745e-06	21273
SA_entorhinal	rs3776807	A	G	-2.9825	0.6492	4.344e-06	21273
SA_entorhinal	rs3776808	A	G	3.5009	0.7494	2.987e-06	21273
SA_entorhinal	rs3776809	A	G	-3.507	0.7472	2.687e-06	21273
SA_entorhinal	rs62418741	A	G	-3.3634	0.7269	3.707e-06	21022
SA_entorhinal	rs1499564	A	G	-3.377	0.7022	1.517e-06	21022
SA_entorhinal	rs62418743	T	C	-3.3678	0.71	2.101e-06	21022
SA_entorhinal	rs6922474	A	C	-3.3557	0.7092	2.229e-06	21022
SA_entorhinal	rs6902363	T	C	3.3311	0.7089	2.618e-06	21022
SA_entorhinal	rs4946431	A	G	3.4389	0.7066	1.132e-06	21022
SA_entorhinal	rs113288480	A	G	-3.4423	0.7057	1.072e-06	21022
SA_entorhinal	rs111458650	A	G	-3.3831	0.7085	1.795e-06	21022
SA_entorhinal	rs11153833	A	G	3.4678	0.7048	8.629e-07	21022
SA_entorhinal	rs7752178	T	C	-3.3799	0.7087	1.848e-06	21022
SA_entorhinal	rs7738144	T	G	3.3639	0.708	2.018e-06	21022
SA_entorhinal	rs72963141	A	T	3.4587	0.705	9.284e-07	21022
SA_entorhinal	rs62418963	A	C	-3.3731	0.7086	1.933e-06	20970
SA_entorhinal	rs1603965	A	C	-3.257	0.691	2.435e-06	21022
SA_entorhinal	rs62418964	A	G	-3.453	0.7037	9.269e-07	21022
SA_entorhinal	rs62418966	T	C	-3.4631	0.7036	8.568e-07	21022
SA_entorhinal	rs12524607	A	G	-3.4634	0.7035	8.526e-07	21022
SA_entorhinal	rs17238430	A	G	3.4522	0.7034	9.222e-07	21022
SA_entorhinal	rs11153838	A	T	-3.1804	0.692	4.311e-06	21022
SA_entorhinal	rs17238563	A	G	-3.1848	0.6907	4.011e-06	21022
SA_entorhinal	rs62418968	A	G	3.3118	0.7046	2.599e-06	20970
SA_entorhinal	rs11962344	A	G	3.4367	0.7022	9.869e-07	21022
SA_entorhinal	rs11969898	A	T	-3.4578	0.7031	8.755e-07	21022
SA_entorhinal	rs4946433	A	G	3.4356	0.7029	1.018e-06	21022
SA_entorhinal	rs56279051	A	G	3.4238	0.704	1.152e-06	21022
SA_entorhinal	rs62418970	A	T	3.4345	0.7042	1.075e-06	21022
SA_entorhinal	rs72963152	T	C	3.4528	0.7049	9.651e-07	21022
SA_entorhinal	rs9320697	A	G	3.261	0.7016	3.355e-06	21022
SA_entorhinal	rs807303	A	G	3.253	0.7012	3.498e-06	21022
SA_entorhinal	rs11375123	i	r	3.3595	0.7081	2.094e-06	20641
SA_entorhinal	rs807302	T	G	3.2554	0.7005	3.365e-06	21022
SA_entorhinal	6:120041185:C_CA	i	r	3.787	0.8205	3.917e-06	18227
SA_entorhinal	7:101046022:TCCTC	d	r	-3.518	0.7696	4.85e-06	19082
SA_entorhinal	7:101046808_CAACAA_C	d	r	-3.3154	0.7188	3.976e-06	20892
SA_entorhinal	rs34892954	A	C	-3.3208	0.7112	3.024e-06	21273
SA_entorhinal	rs62465633	C	G	-3.2954	0.711	3.567e-06	21273
SA_entorhinal	rs34057479	A	G	-3.4588	0.745	3.439e-06	20892
SA_entorhinal	rs34424660	T	G	-3.3934	0.7238	2.757e-06	21273
SA_entorhinal	rs34895220	A	G	3.2777	0.7085	3.728e-06	21273
SA_entorhinal	rs6956534	A	T	3.262	0.7079	4.059e-06	21273
SA_entorhinal	rs6977536	A	T	-3.3004	0.7076	3.1e-06	21273
SA_entorhinal	rs35004829	A	G	-3.3529	0.7073	2.132e-06	21273
SA_entorhinal	7:101050236_AAAAC_A	d	r	-3.3925	0.7193	2.403e-06	20892
SA_entorhinal	rs11523200	T	C	3.3036	0.7064	2.917e-06	21273
SA_entorhinal	7:101053714_AAAG_A	d	r	-3.3728	0.714	2.314e-06	20892
SA_entorhinal	rs34358715	T	C	-3.3251	0.7044	2.352e-06	21273
SA_entorhinal	rs62465637	C	G	3.323	0.7043	2.382e-06	21273
SA_entorhinal	rs13238579	A	G	-3.322	0.7042	2.391e-06	21273
SA_entorhinal	rs35337501	T	C	-3.3212	0.7041	2.397e-06	21273
SA_entorhinal	rs6943356	T	G	3.3291	0.7039	2.254e-06	21273
SA_entorhinal	rs35479406	T	G	3.28	0.7025	3.029e-06	21273
SA_entorhinal	rs62465642	A	C	3.2576	0.7025	3.533e-06	21273
SA_entorhinal	rs62463402	T	C	-3.2508	0.7065	4.192e-06	20892
SA_entorhinal	rs6949868	A	C	3.2195	0.7002	4.269e-06	21273
SA_entorhinal	rs35291007	i	r	-3.2853	0.7113	3.862e-06	20892
SA_entorhinal	rs11767330	T	G	-3.2173	0.699	4.167e-06	21273
SA_entorhinal	7:101063620_TGACA_T	d	r	-3.2782	0.7143	4.44e-06	20892
SA_entorhinal	rs13239393	T	C	3.2107	0.6988	4.339e-06	21273
SA_entorhinal	rs34150905	C	G	3.1979	0.6986	4.699e-06	21273
SA_entorhinal	rs34677547	C	G	3.197	0.6985	4.724e-06	21273
SA_entorhinal	rs13228909	T	C	-3.196	0.6984	4.737e-06	21273
SA_entorhinal	rs34861673	A	C	-3.3186	0.7102	2.972e-06	21273
SA_entorhinal	rs6981935	T	C	3.4114	0.7366	3.628e-06	21273
SA_entorhinal	rs1919483	T	C	3.3905	0.7363	4.129e-06	21273
SA_entorhinal	rs1441769	T	C	3.3461	0.7306	4.649e-06	21273
SA_entorhinal	rs13263509	A	G	-3.475	0.7562	4.327e-06	21273
SA_entorhinal	rs7823528	T	C	-3.4818	0.7576	4.304e-06	21273
SA_entorhinal	rs10099449	T	C	-3.4575	0.7492	3.927e-06	21273
SA_entorhinal	rs12375318	A	G	-3.8632	0.7889	9.722e-07	21273
SA_entorhinal	rs10097214	A	G	3.4357	0.7357	3.015e-06	21273
SA_entorhinal	rs79232571	C	G	-3.5523	0.7584	2.812e-06	21273
SA_entorhinal	rs35620080	A	G	3.4366	0.7361	3.032e-06	21273
SA_entorhinal	rs34309063	A	G	-3.6045	0.7566	1.894e-06	21273
SA_entorhinal	rs17410577	C	G	-3.568	0.7567	2.411e-06	21273
SA_entorhinal	rs13266204	A	G	3.4853	0.7491	3.28e-06	21273
SA_entorhinal	rs6651355	A	C	3.7131	0.7622	1.106e-06	20913
SA_entorhinal	8:77976015:G_GT	i	r	14.5319	3.1435	3.786e-06	19737
SA_entorhinal	rs76581059	T	G	-10.6656	2.2863	3.087e-06	20529
SA_entorhinal	8:132649999	A	C	4.4915	0.9836	4.958e-06	18291
SA_entorhinal	rs2484529	T	C	3.7404	0.8155	4.508e-06	20705
SA_entorhinal	rs17774221	A	G	-7.2879	1.5821	4.097e-06	21273
SA_entorhinal	rs4408506	T	C	3.6505	0.7909	3.914e-06	21166
SA_entorhinal	rs7175091	T	C	-4.4753	0.9719	4.13e-06	17543
SA_entorhinal	rs7173047	A	T	4.0095	0.7573	1.192e-07	20628
SA_entorhinal	rs1574570	T	C	3.6823	0.7303	4.602e-07	20628
SA_entorhinal	rs2005636	T	C	3.6694	0.7283	4.7e-07	20628
SA_entorhinal	rs1807198	A	G	-3.6452	0.7102	2.854e-07	20628
SA_entorhinal	rs2001191	T	C	-3.6826	0.7276	4.168e-07	20628
SA_entorhinal	rs2001192	T	C	-3.6806	0.7365	5.814e-07	20628
SA_entorhinal	rs34803195	A	G	-3.0984	0.6361	1.109e-06	21273
SA_entorhinal	rs4784817	T	C	-3.1953	0.6437	6.901e-07	21273
SA_entorhinal	rs73504994	A	G	6.551	1.4267	4.397e-06	16523
SA_entorhinal	rs247787	A	G	-3.771	0.8016	2.548e-06	21273
SA_entorhinal	rs247786	A	G	3.8127	0.805	2.177e-06	21273
SA_entorhinal	rs74745480	T	G	-15.9318	3.1229	3.368e-07	10056
SA_frontalpole	1:82958953	T	C	-12.3943	2.5102	7.908e-07	10078
SA_frontalpole	1:82977627	T	C	-11.3122	2.4321	3.299e-06	10663
SA_frontalpole	rs189543334	T	C	11.2347	2.4256	3.625e-06	10663
SA_frontalpole	rs12741548	T	G	2.191	0.4778	4.537e-06	22902
SA_frontalpole	rs12092412	T	C	-2.1627	0.4709	4.379e-06	22902
SA_frontalpole	rs35411601	T	C	2.1652	0.4709	4.261e-06	22902
SA_frontalpole	rs12740185	T	C	-2.1614	0.4708	4.418e-06	22902
SA_frontalpole	rs11122610	A	C	2.1635	0.4709	4.347e-06	22902
SA_frontalpole	rs35686881	A	G	-2.1835	0.4766	4.621e-06	22902
SA_frontalpole	rs11122611	T	C	2.1907	0.477	4.369e-06	22902
SA_frontalpole	rs12095158	A	G	-2.1897	0.477	4.425e-06	22902
SA_frontalpole	rs12064798	A	T	-2.2111	0.4787	3.851e-06	22902
SA_frontalpole	rs10864785	T	C	2.2057	0.4794	4.198e-06	22902
SA_frontalpole	rs16981939	T	C	1.3274	0.2837	2.892e-06	22902
SA_frontalpole	rs10209246	T	C	1.3181	0.2838	3.399e-06	22902
SA_frontalpole	rs10171927	A	G	-1.3119	0.2835	3.694e-06	22902
SA_frontalpole	rs2028173	T	G	1.313	0.2832	3.56e-06	22902
SA_frontalpole	rs851342	T	C	-1.3065	0.2858	4.83e-06	22902
SA_frontalpole	rs10169133	C	G	-1.3077	0.2818	3.474e-06	22902
SA_frontalpole	rs10169702	T	C	1.3082	0.2817	3.404e-06	22902
SA_frontalpole	rs851422	A	G	1.3009	0.2846	4.841e-06	22902
SA_frontalpole	rs1561271	A	G	-1.3215	0.2802	2.407e-06	22902
SA_frontalpole	rs10178428	A	G	-1.2856	0.2802	4.481e-06	22902
SA_frontalpole	2:188306834:CAT_C	d	r	-1.7477	0.3722	2.651e-06	18954
SA_frontalpole	rs112368369	i	r	-2.6071	0.5558	2.725e-06	13502
SA_frontalpole	rs4689322	A	G	1.3623	0.2893	2.482e-06	22902
SA_frontalpole	rs145962787	A	G	-10.9835	2.274	1.366e-06	11469
SA_frontalpole	rs9327072	A	G	1.3538	0.2961	4.845e-06	22902
SA_frontalpole	6:9514143_TTAAA_T	d	r	-1.5676	0.3322	2.368e-06	22327
SA_frontalpole	rs1914726	T	G	1.7495	0.3693	2.169e-06	22048
SA_frontalpole	rs12533351	A	G	1.3674	0.2944	3.391e-06	22542
SA_frontalpole	rs34133655	T	C	-1.3447	0.2942	4.866e-06	22542
SA_frontalpole	rs7793634	T	C	-1.3469	0.2934	4.412e-06	22542
SA_frontalpole	rs58127279	T	C	-5.1893	1.1243	3.922e-06	12277
SA_frontalpole	rs61731943	T	C	-5.8352	1.1882	9.054e-07	14797
SA_frontalpole	9:139930945_G_A	A	G	1.3952	0.2998	3.257e-06	22435
SA_frontalpole	rs56255325	i	r	1.3546	0.2937	3.97e-06	22519
SA_frontalpole	rs7958986	A	G	1.3302	0.2909	4.807e-06	22902
SA_frontalpole	rs10778775	A	T	-1.4397	0.2994	1.518e-06	22902
SA_frontalpole	rs10746176	T	C	1.4364	0.3002	1.707e-06	22902
SA_frontalpole	rs10778777	A	G	1.3727	0.2956	3.417e-06	22902
SA_frontalpole	12:76566811:AAAG_	d	r	1.8781	0.3804	7.932e-07	20312
SA_frontalpole	rs11114747	A	G	1.3775	0.2932	2.619e-06	22902
SA_frontalpole	12:76567952:A_ACT	i	r	1.492	0.3084	1.316e-06	20312
SA_frontalpole	rs7134197	A	T	1.3938	0.293	1.964e-06	22902
SA_frontalpole	rs10862272	T	C	1.4017	0.2931	1.733e-06	22902
SA_frontalpole	rs5016150	C	G	1.5781	0.3088	3.203e-07	22519
SA_frontalpole	rs61925167	A	T	1.4062	0.2934	1.647e-06	22902
SA_frontalpole	rs1533517	T	C	1.3817	0.2919	2.215e-06	22902
SA_frontalpole	rs1973708	A	C	-1.3625	0.2908	2.791e-06	22902
SA_frontalpole	rs61948049	T	C	-4.8614	1.0332	2.538e-06	17530
SA_frontalpole	rs117956011	A	G	-3.4828	0.7519	3.621e-06	22327
SA_frontalpole	rs113050298	T	C	-3.0819	0.6493	2.067e-06	22710
SA_frontalpole	rs10406632	T	C	1.7	0.3533	1.501e-06	21533
SA_fusiform	rs114474233	A	G	-57.1386	11.7194	1.085e-06	13583
SA_fusiform	rs77516432	T	C	58.274	12.3556	2.4e-06	17219
SA_fusiform	rs112245398	A	G	-57.8086	12.4029	3.148e-06	17219
SA_fusiform	rs799320	T	G	11.1444	2.4114	3.808e-06	21952
SA_fusiform	rs36136468	A	G	-12.3954	2.701	4.451e-06	22383
SA_fusiform	rs62242182	A	G	-12.5489	2.6068	1.481e-06	22383
SA_fusiform	rs1866402	T	C	-12.5233	2.6051	1.53e-06	22383
SA_fusiform	rs13094441	A	T	-12.3877	2.6041	1.965e-06	22383
SA_fusiform	rs11710266	T	C	-12.2913	2.6036	2.348e-06	22383
SA_fusiform	rs36047207	A	C	-12.3048	2.6028	2.272e-06	22383
SA_fusiform	rs71325080	A	G	-12.3896	2.7103	4.846e-06	22003
SA_fusiform	3:45691201:C_CAT	i	r	-12.6888	2.7546	4.095e-06	20674
SA_fusiform	rs35321098	A	G	-12.8016	2.6644	1.55e-06	22383
SA_fusiform	rs11709753	T	C	-12.2011	2.5923	2.518e-06	22383
SA_fusiform	rs2118752	A	G	-11.9462	2.5735	3.45e-06	22383
SA_fusiform	rs1964416	A	G	-12.2357	2.5858	2.224e-06	22383
SA_fusiform	rs2578694	T	C	-12.1725	2.5842	2.473e-06	22383
SA_fusiform	rs2673023	T	C	-11.9583	2.5752	3.423e-06	22383
SA_fusiform	rs1318992	T	C	-11.9184	2.5744	3.664e-06	22383
SA_fusiform	rs2016681	C	G	11.9513	2.5754	3.475e-06	22383
SA_fusiform	rs1962892	T	C	11.9589	2.5755	3.428e-06	22383
SA_fusiform	rs2578679	A	G	12.0283	2.5777	3.065e-06	22383
SA_fusiform	rs62242840	A	G	39.2278	8.3383	2.544e-06	18314
SA_fusiform	rs56027104	A	G	-21.8083	4.6802	3.166e-06	12273
SA_fusiform	rs658904	A	G	-11.2962	2.3768	2.006e-06	21025
SA_fusiform	rs610449	A	G	11.0637	2.376	3.217e-06	21025
SA_fusiform	rs6444747	C	G	-11.895	2.5941	4.532e-06	21025
SA_fusiform	rs9683037	A	G	-11.9213	2.5937	4.302e-06	21025
SA_fusiform	rs58396760	C	G	12.009	2.6175	4.477e-06	21025
SA_fusiform	rs150609795	T	G	31.0406	6.5217	1.94e-06	21731
SA_fusiform	rs4552422	A	G	10.5066	2.2833	4.194e-06	22383
SA_fusiform	rs1460062	A	G	-10.241	2.2424	4.947e-06	22383
SA_fusiform	rs1380585	A	G	10.3172	2.246	4.359e-06	22383
SA_fusiform	rs13136785	T	C	24.5895	5.1883	2.144e-06	21063
SA_fusiform	rs55677185	A	C	24.4116	5.1861	2.512e-06	21063
SA_fusiform	rs4700008	A	G	-10.4004	2.2604	4.202e-06	22383
SA_fusiform	rs11957122	T	C	10.5263	2.2643	3.34e-06	22383
SA_fusiform	rs4358485	A	G	13.1577	2.5545	2.593e-07	22003
SA_fusiform	rs6450406	A	G	-13.3629	2.5599	1.788e-07	22003
SA_fusiform	rs10461616	T	C	-13.7952	2.5151	4.137e-08	22383
SA_fusiform	rs10055224	T	C	-13.7874	2.5151	4.209e-08	22383
SA_fusiform	rs10940512	C	G	13.7799	2.5267	4.934e-08	22383
SA_fusiform	rs10940513	T	C	14.2324	2.6552	8.318e-08	20284
SA_fusiform	rs10471991	T	C	-13.6637	2.5273	6.431e-08	22383
SA_fusiform	rs9292122	A	G	12.8699	2.6756	1.508e-06	22383
SA_fusiform	rs3309	A	T	13.4521	2.5011	7.513e-08	22383
SA_fusiform	rs6888317	A	G	13.6159	2.501	5.207e-08	22383
SA_fusiform	rs6870175	A	G	-13.6124	2.5003	5.2e-08	22383
SA_fusiform	rs4146565	T	C	-13.6154	2.4995	5.113e-08	22383
SA_fusiform	rs2408597	A	G	13.3974	2.4906	7.48e-08	22383
SA_fusiform	rs6893754	A	G	13.2546	2.4827	9.359e-08	22383
SA_fusiform	rs6862118	A	G	13.1676	2.4974	1.346e-07	22383
SA_fusiform	rs7731700	T	C	13.0998	2.4991	1.591e-07	22383
SA_fusiform	rs41106	T	G	13.2239	2.4801	9.717e-08	22383
SA_fusiform	rs33329	T	C	-12.755	2.7384	3.196e-06	22253
SA_fusiform	rs832567	A	C	13.1659	2.4771	1.066e-07	22383
SA_fusiform	rs832573	T	C	-12.9304	2.4733	1.714e-07	22383
SA_fusiform	rs2548663	A	G	13.1219	2.4773	1.177e-07	22383
SA_fusiform	rs702689	A	G	12.9469	2.475	1.685e-07	22383
SA_fusiform	rs252912	T	C	13.2996	2.5487	1.808e-07	22383
SA_fusiform	rs96844	A	G	13.2701	2.5489	1.927e-07	22383
SA_fusiform	rs252924	A	G	-12.9521	2.5363	3.277e-07	22383
SA_fusiform	rs33320	T	C	13.1923	2.518	1.613e-07	22383
SA_fusiform	rs33317	A	G	13.1951	2.5413	2.078e-07	22383
SA_fusiform	rs702681	T	C	13.0108	2.5328	2.792e-07	22383
SA_fusiform	rs2591960	A	T	12.6558	2.5741	8.804e-07	22383
SA_fusiform	rs11243145	A	G	10.8188	2.3524	4.245e-06	22383
SA_fusiform	rs4870499	T	G	-12.9159	2.7232	2.107e-06	22117
SA_fusiform	rs9969052	C	G	11.8292	2.5505	3.518e-06	22117
SA_fusiform	rs6931994	A	G	13.1366	2.5952	4.153e-07	22117
SA_fusiform	rs2171798	A	C	-10.6323	2.3237	4.749e-06	22117
SA_fusiform	rs12208834	A	G	11.4152	2.4829	4.275e-06	22117
SA_fusiform	rs17322427	A	G	11.4512	2.4763	3.757e-06	22117
SA_fusiform	rs12661846	T	C	-11.3343	2.4756	4.685e-06	22117
SA_fusiform	rs11156124	A	G	-11.4729	2.4718	3.458e-06	22117
SA_fusiform	rs12204990	C	G	-11.4625	2.4697	3.462e-06	22117
SA_fusiform	rs12202980	A	G	-11.4064	2.4667	3.761e-06	22117
SA_fusiform	rs41487150	A	G	-13.695	2.7955	9.635e-07	22117
SA_fusiform	rs10485202	C	G	-11.3425	2.4509	3.694e-06	22117
SA_fusiform	rs9322591	T	G	-10.9045	2.2983	2.089e-06	22117
SA_fusiform	rs7769828	T	C	11.3835	2.2886	6.562e-07	22117
SA_fusiform	rs6899555	T	C	11.3175	2.4494	3.828e-06	22117
SA_fusiform	rs11156128	A	G	-11.4464	2.4567	3.173e-06	22117
SA_fusiform	rs62422643	T	C	-11.1755	2.4458	4.896e-06	22117
SA_fusiform	rs6930554	A	G	-10.6691	2.2776	2.809e-06	22117
SA_fusiform	rs7757945	T	C	10.7475	2.2728	2.258e-06	22117
SA_fusiform	rs7769037	A	G	10.4238	2.262	4.061e-06	22117
SA_fusiform	rs11156131	A	G	11.1177	2.4313	4.815e-06	22117
SA_fusiform	rs62422648	T	C	-11.1095	2.4313	4.893e-06	22117
SA_fusiform	rs17054622	T	C	11.2945	2.4464	3.896e-06	22117
SA_fusiform	rs12204852	T	G	-11.1289	2.4276	4.553e-06	22117
SA_fusiform	rs9397316	T	C	-11.1979	2.2695	8.054e-07	22117
SA_fusiform	rs12206666	A	G	-11.1264	2.4276	4.579e-06	22117
SA_fusiform	rs10485199	T	C	11.1135	2.4276	4.693e-06	22117
SA_fusiform	rs11156134	A	C	-11.1082	2.429	4.804e-06	22117
SA_fusiform	rs4377798	T	C	-10.8206	2.2572	1.636e-06	22117
SA_fusiform	rs1885625	T	G	10.8301	2.2583	1.621e-06	22117
SA_fusiform	rs6557518	A	G	-10.7814	2.2585	1.809e-06	22117
SA_fusiform	rs6928411	A	G	-10.8441	2.2572	1.553e-06	22117
SA_fusiform	rs6913825	T	C	10.8475	2.2571	1.541e-06	22117
SA_fusiform	rs12211618	A	G	-11.4707	2.4258	2.26e-06	22117
SA_fusiform	rs6557519	T	C	-10.8444	2.2589	1.581e-06	22117
SA_fusiform	rs4869906	A	G	10.9857	2.2582	1.146e-06	22117
SA_fusiform	rs4870505	A	C	11.5642	2.2693	3.469e-07	22117
SA_fusiform	rs6936043	T	G	10.9821	2.2589	1.164e-06	22117
SA_fusiform	rs6909426	A	C	-10.9827	2.259	1.164e-06	22117
SA_fusiform	rs7746495	T	G	-11.5386	2.2695	3.692e-07	22117
SA_fusiform	rs9285548	T	C	10.9761	2.2575	1.161e-06	22117
SA_fusiform	rs1407509	T	C	10.782	2.2582	1.802e-06	22117
SA_fusiform	rs6917637	T	C	11.1175	2.2694	9.642e-07	22117
SA_fusiform	rs2281392	T	C	11.4255	2.4392	2.812e-06	22117
SA_fusiform	rs1057250	T	C	-12.1656	2.5242	1.439e-06	22117
SA_fusiform	rs6902173	T	C	-10.4518	2.2591	3.719e-06	22117
SA_fusiform	rs62424281	A	G	11.2184	2.3895	2.669e-06	22117
SA_fusiform	rs2024657	A	G	11.0648	2.2782	1.192e-06	22117
SA_fusiform	rs4501442	T	G	11.8844	2.3662	5.098e-07	22117
SA_fusiform	6:170607607:T_TTA	i	r	-13.8169	2.7917	7.448e-07	17296
SA_fusiform	rs796914544	i	r	-13.2972	2.7742	1.642e-06	19073
SA_fusiform	rs10092976	A	G	11.4401	2.475	3.797e-06	22383
SA_fusiform	rs10093887	C	G	-11.3234	2.471	4.596e-06	22383
SA_fusiform	rs7831940	T	G	11.5496	2.4656	2.81e-06	22383
SA_fusiform	rs7908468	T	C	-10.805	2.264	1.82e-06	22023
SA_fusiform	rs321348	A	G	-12.6928	2.5292	5.207e-07	22383
SA_fusiform	rs17535419	T	G	-15.6671	3.1369	5.9e-07	22383
SA_fusiform	rs11418777	i	r	13.3561	2.5839	2.355e-07	22003
SA_fusiform	rs150666039	A	G	15.3766	3.1594	1.133e-06	22383
SA_fusiform	rs73015129	T	C	15.5716	3.1281	6.425e-07	22383
SA_fusiform	rs4635115	T	C	14.7936	3.1021	1.852e-06	22383
SA_fusiform	rs73015134	T	C	15.3826	3.1171	8.016e-07	22383
SA_fusiform	rs77820525	T	C	-15.3985	3.0917	6.34e-07	22383
SA_fusiform	rs321350	A	T	-12.5297	2.5158	6.348e-07	22383
SA_fusiform	rs73015136	A	T	-12.3724	2.4942	7.032e-07	22383
SA_fusiform	rs10502128	T	C	14.9696	3.053	9.429e-07	22383
SA_fusiform	rs73015141	T	C	-15.2806	3.0666	6.263e-07	22383
SA_fusiform	rs57168185	A	G	-14.9712	3.0484	9.057e-07	22383
SA_fusiform	rs73015142	T	C	-15.2759	3.0603	5.989e-07	22383
SA_fusiform	rs321403	T	G	12.4759	2.4668	4.245e-07	22383
SA_fusiform	rs321404	T	C	-12.5198	2.4675	3.897e-07	22383
SA_fusiform	rs78087740	A	G	15.214	3.0573	6.482e-07	22383
SA_fusiform	rs73015146	T	C	-15.2467	3.0552	6.023e-07	22383
SA_fusiform	rs113513252	A	G	15.2247	3.0523	6.101e-07	22383
SA_fusiform	rs112681152	T	C	-15.2245	3.0499	5.983e-07	22383
SA_fusiform	rs111321694	T	C	14.4299	3.0786	2.77e-06	22003
SA_fusiform	rs113889916	A	G	-15.4994	3.1117	6.324e-07	22383
SA_fusiform	rs112917724	A	G	15.1783	3.0483	6.381e-07	22383
SA_fusiform	rs7941114	A	C	-12.7473	2.4639	2.296e-07	22383
SA_fusiform	rs321406	A	G	12.6175	2.4547	2.745e-07	22383
SA_fusiform	rs11213729	A	G	12.5672	2.4494	2.885e-07	22383
SA_fusiform	rs68122012	T	C	12.6609	2.4564	2.546e-07	22253
SA_fusiform	rs17457076	A	C	15.1564	3.0254	5.451e-07	22383
SA_fusiform	rs1878536	A	G	-12.478	2.4431	3.267e-07	22383
SA_fusiform	rs1878537	T	C	-12.49	2.4426	3.164e-07	22383
SA_fusiform	rs7950087	A	G	-15.1077	3.0212	5.716e-07	22383
SA_fusiform	rs7924641	A	G	-12.4793	2.4411	3.184e-07	22383
SA_fusiform	rs12275746	T	C	12.4969	2.4405	3.045e-07	22383
SA_fusiform	rs12276034	A	G	12.5079	2.4398	2.951e-07	22383
SA_fusiform	rs73015151	A	C	14.8455	3.0121	8.281e-07	22383
SA_fusiform	rs17535886	T	G	-14.8442	3.0121	8.296e-07	22383
SA_fusiform	rs17457375	T	C	14.8406	3.0121	8.35e-07	22383
SA_fusiform	11:110955857_TA_T	d	r	14.8439	3.0407	1.052e-06	22003
SA_fusiform	rs17535942	T	G	15.0291	3.0368	7.457e-07	22383
SA_fusiform	rs17457430	A	G	15.0071	3.0366	7.729e-07	22383
SA_fusiform	rs7131434	A	C	-15.2805	3.0436	5.152e-07	22383
SA_fusiform	rs7101466	A	G	15.0172	3.0365	7.591e-07	22383
SA_fusiform	rs7101576	C	G	15.0123	3.0364	7.653e-07	22383
SA_fusiform	rs321414	A	T	12.5298	2.4456	3.001e-07	22383
SA_fusiform	rs17536059	C	G	14.6819	3.0205	1.169e-06	22383
SA_fusiform	rs321416	A	C	12.4469	2.4326	3.109e-07	22383
SA_fusiform	rs73015171	A	G	14.9022	3.0272	8.531e-07	22383
SA_fusiform	rs6589210	A	C	-14.9629	3.0259	7.614e-07	22383
SA_fusiform	rs7110930	T	C	14.91	3.0259	8.331e-07	22383
SA_fusiform	rs73015175	T	C	15.1799	3.0336	5.62e-07	22383
SA_fusiform	rs17536143	T	G	15.1871	3.0336	5.546e-07	22383
SA_fusiform	rs321418	T	C	-12.4764	2.4323	2.905e-07	22383
SA_fusiform	rs17457658	T	C	-14.9099	3.0274	8.435e-07	22383
SA_fusiform	rs12419745	A	G	-15.0723	3.0201	6.015e-07	22383
SA_fusiform	rs321422	A	G	-12.4334	2.4326	3.204e-07	22383
SA_fusiform	rs7123402	A	T	-12.7203	2.4378	1.81e-07	22383
SA_fusiform	rs574760	T	C	12.4455	2.433	3.131e-07	22383
SA_fusiform	rs167684	A	G	-12.446	2.4329	3.125e-07	22383
SA_fusiform	rs10651522	i	r	14.3237	3.1294	4.714e-06	22003
SA_fusiform	rs7112932	A	G	-14.4352	3.0982	3.175e-06	22383
SA_fusiform	rs73015196	A	G	-14.6175	3.0967	2.354e-06	22383
SA_fusiform	rs73015199	A	G	14.6089	3.0966	2.385e-06	22383
SA_fusiform	rs7111445	T	C	14.6222	3.096	2.324e-06	22383
SA_fusiform	rs17458235	A	G	-14.5574	3.095	2.558e-06	22383
SA_fusiform	rs10502129	T	G	-14.6109	3.0959	2.364e-06	22383
SA_fusiform	rs10502130	A	G	14.6762	3.0952	2.12e-06	22383
SA_fusiform	rs73017109	A	C	14.6673	3.0944	2.138e-06	22383
SA_fusiform	rs1470537	T	C	14.6907	3.094	2.053e-06	22383
SA_fusiform	rs12421769	T	C	-14.6815	3.0938	2.081e-06	22383
SA_fusiform	rs139778087	i	r	14.5531	3.125	3.208e-06	22003
SA_fusiform	rs73017114	T	C	14.6941	3.0923	2.016e-06	22383
SA_fusiform	rs17458493	T	C	14.6923	3.0919	2.016e-06	22383
SA_fusiform	rs17458541	A	G	14.6651	3.0912	2.093e-06	22383
SA_fusiform	rs17458597	A	T	-14.6899	3.0909	2.008e-06	22383
SA_fusiform	rs73017176	A	T	-14.685	3.0908	2.022e-06	22383
SA_fusiform	rs80221187	T	C	-14.6994	3.0907	1.974e-06	22383
SA_fusiform	rs73017177	T	C	14.6953	3.0913	1.997e-06	22383
SA_fusiform	rs73017179	T	C	14.6865	3.0913	2.024e-06	22383
SA_fusiform	rs1356411	A	C	14.6641	3.0897	2.073e-06	22383
SA_fusiform	rs12420595	A	G	14.6606	3.0901	2.091e-06	22383
SA_fusiform	rs17537360	A	G	-14.6966	3.0883	1.947e-06	22383
SA_fusiform	rs17537367	T	C	-14.6813	3.0893	2.012e-06	22383
SA_fusiform	rs17458885	C	G	-14.6662	3.0894	2.061e-06	22383
SA_fusiform	rs7931995	A	T	-14.6437	3.0898	2.144e-06	22383
SA_fusiform	rs484021	T	C	-13.6634	2.8355	1.446e-06	22383
SA_fusiform	rs7112075	T	C	13.5061	2.8344	1.887e-06	22383
SA_fusiform	rs559757	T	G	-13.801	2.8356	1.132e-06	22383
SA_fusiform	rs560503	T	C	13.7938	2.8355	1.146e-06	22383
SA_fusiform	rs514347	A	C	13.7999	2.8346	1.125e-06	22383
SA_fusiform	rs565152	A	T	13.8039	2.8344	1.115e-06	22383
SA_fusiform	rs539009	A	G	-13.8348	2.8348	1.059e-06	22383
SA_fusiform	rs516177	T	C	-13.7968	2.8333	1.119e-06	22383
SA_fusiform	rs17459717	C	G	-13.7904	2.8329	1.127e-06	22383
SA_fusiform	rs494921	T	G	-13.8161	2.8318	1.067e-06	22383
SA_fusiform	rs580656	A	G	-13.734	2.8299	1.215e-06	22383
SA_fusiform	rs536679	A	T	-13.7189	2.8298	1.247e-06	22383
SA_fusiform	rs502584	T	C	-13.7129	2.8297	1.259e-06	22383
SA_fusiform	rs511835	A	G	-13.8601	2.8298	9.689e-07	22383
SA_fusiform	rs534858	T	C	-13.8908	2.8304	9.212e-07	22383
SA_fusiform	rs536579	T	C	-14.4796	2.8146	2.683e-07	22383
SA_fusiform	rs576877	A	G	14.4331	2.8105	2.815e-07	22383
SA_fusiform	rs1900556	T	C	14.4028	2.8088	2.934e-07	22383
SA_fusiform	rs7926634	T	C	-14.3643	2.8078	3.123e-07	22383
SA_fusiform	rs7940380	T	C	14.3999	2.8069	2.895e-07	22383
SA_fusiform	rs1517578	T	G	-14.4434	2.8095	2.733e-07	22383
SA_fusiform	rs7939631	T	C	-14.374	2.8012	2.876e-07	22383
SA_fusiform	rs7927998	C	G	-14.3769	2.8016	2.871e-07	22383
SA_fusiform	rs73021576	A	G	14.4018	2.8076	2.905e-07	22383
SA_fusiform	rs73021578	T	C	-14.405	2.8077	2.889e-07	22383
SA_fusiform	rs527397	A	G	14.4061	2.8108	2.971e-07	22383
SA_fusiform	rs73003515	T	C	-14.4478	2.8124	2.788e-07	22383
SA_fusiform	rs73003518	C	G	-14.5186	2.8193	2.609e-07	22383
SA_fusiform	rs73003519	A	C	14.8303	2.8682	2.333e-07	22383
SA_fusiform	rs1517581	A	T	-14.5646	2.8197	2.401e-07	22383
SA_fusiform	rs547367	T	C	-14.5643	2.8204	2.418e-07	22383
SA_fusiform	rs5794727	i	r	13.7399	2.8257	1.159e-06	22003
SA_fusiform	rs516110	T	G	14.1476	2.8099	4.781e-07	22383
SA_fusiform	rs17460676	T	C	14.5534	2.8272	2.637e-07	22383
SA_fusiform	rs555063	C	G	14.0839	2.8145	5.616e-07	22383
SA_fusiform	rs12421339	T	C	-14.4267	2.8321	3.505e-07	22383
SA_fusiform	rs522188	T	C	14.5933	2.8309	2.535e-07	22383
SA_fusiform	rs17460781	T	C	-14.6658	2.8352	2.307e-07	22383
SA_fusiform	rs35051367	T	C	-11.5899	2.478	2.911e-06	22383
SA_fusiform	rs949279	A	G	-12.359	2.415	3.095e-07	22383
SA_fusiform	rs7936534	A	G	12.2597	2.4193	4.031e-07	22383
SA_fusiform	rs11623633	A	G	14.9655	2.3012	7.862e-11	22383
SA_fusiform	14:59814036:G_GCA	i	r	-17.5057	2.5724	1.009e-11	19904
SA_fusiform	rs941886	A	C	-12.068	2.3611	3.202e-07	22383
SA_fusiform	rs755011	T	C	-12.8644	2.2604	1.261e-08	22383
SA_fusiform	rs17834020	T	C	-15.282	2.2655	1.524e-11	22383
SA_fusiform	rs12878070	T	G	15.5067	2.2648	7.547e-12	22383
SA_fusiform	rs11626926	A	G	16.0332	2.2431	8.819e-13	22383
SA_fusiform	rs17834032	T	C	16.0832	2.2426	7.416e-13	22383
SA_fusiform	rs1547198	T	C	15.5423	2.2634	6.57e-12	22383
SA_fusiform	rs35779477	A	G	-15.4731	2.2636	8.157e-12	22383
SA_fusiform	rs10130826	T	G	-11.057	2.3043	1.6e-06	22383
SA_fusiform	rs1958181	T	C	-15.2584	2.2665	1.671e-11	22383
SA_fusiform	rs3742647	A	C	15.7353	2.3074	9.133e-12	21873
SA_fusiform	rs4901921	T	C	-15.446	2.2733	1.086e-11	22383
SA_fusiform	rs12896316	T	C	-15.9033	2.2498	1.562e-12	22383
SA_fusiform	rs12896455	A	G	15.8834	2.2498	1.664e-12	22383
SA_fusiform	rs1271513	T	C	-12.2156	2.3636	2.363e-07	22383
SA_fusiform	rs2349702	T	C	15.7817	2.2498	2.302e-12	22383
SA_fusiform	rs1253194	T	C	11.7136	2.2873	3.037e-07	22383
SA_fusiform	rs11623345	A	G	-15.8399	2.255	2.15e-12	22383
SA_fusiform	rs12590921	A	C	-13.8179	2.2753	1.254e-09	22383
SA_fusiform	rs12432950	A	C	15.8967	2.2582	1.929e-12	22383
SA_fusiform	rs12588262	A	G	-15.8774	2.2586	2.068e-12	22383
SA_fusiform	rs3861497	T	C	15.8496	2.2611	2.39e-12	22383
SA_fusiform	rs4898986	A	G	15.8081	2.2587	2.58e-12	22383
SA_fusiform	rs4127823	T	C	13.798	2.2782	1.391e-09	22383
SA_fusiform	rs3850302	T	C	13.7733	2.2795	1.521e-09	22383
SA_fusiform	rs67530928	T	G	-14.7553	2.4638	2.115e-09	22003
SA_fusiform	rs7141150	A	C	15.5363	2.2703	7.735e-12	22383
SA_fusiform	rs4127824	T	C	15.5339	2.2715	7.993e-12	22383
SA_fusiform	rs12587163	A	G	14.1695	2.2508	3.069e-10	22383
SA_fusiform	rs35810735	T	G	-14.1081	2.2519	3.729e-10	22383
SA_fusiform	rs7143866	A	C	-13.7783	2.2475	8.756e-10	22383
SA_fusiform	rs7157202	T	C	-13.932	2.2467	5.604e-10	22383
SA_fusiform	rs60671208	T	C	13.7919	2.2464	8.275e-10	22383
SA_fusiform	rs56952810	T	C	-14.0718	2.2494	3.955e-10	22383
SA_fusiform	rs11158255	T	C	-14.0063	2.247	4.57e-10	22383
SA_fusiform	rs12890928	T	C	-13.8127	2.2744	1.255e-09	22003
SA_fusiform	rs142346448	T	C	-13.9143	2.2763	9.798e-10	22003
SA_fusiform	rs55863633	A	G	-13.1754	2.7201	1.274e-06	22003
SA_fusiform	rs77506113	A	G	-14.1308	2.2731	5.082e-10	22383
SA_fusiform	rs12587396	T	C	14.0526	2.2514	4.332e-10	22383
SA_fusiform	rs56090929	A	G	14.0196	2.2484	4.504e-10	22383
SA_fusiform	rs1253170	T	C	11.3997	2.3487	1.213e-06	22383
SA_fusiform	rs1253172	T	G	-13.0181	2.2938	1.383e-08	22383
SA_fusiform	rs1253173	T	C	12.9646	2.2939	1.589e-08	22383
SA_fusiform	rs1253174	A	G	-12.9598	2.2939	1.608e-08	22383
SA_fusiform	rs1253176	T	C	-13.155	2.2552	5.44e-09	22383
SA_fusiform	rs17255731	T	G	13.1042	2.2497	5.713e-09	22383
SA_fusiform	rs1270990	T	C	12.7435	2.3043	3.197e-08	22383
SA_fusiform	rs1253179	A	G	14.2802	2.4487	5.485e-09	22003
SA_fusiform	rs1253180	A	C	-12.8122	2.4882	2.617e-07	22003
SA_fusiform	rs1253181	A	G	-12.0167	2.306	1.877e-07	22383
SA_fusiform	rs1253182	A	G	-12.0186	2.3366	2.694e-07	22383
SA_fusiform	rs1253183	A	G	12.0567	2.305	1.689e-07	22383
SA_fusiform	rs1612112	A	G	-12.0297	2.3035	1.766e-07	22383
SA_fusiform	rs1253185	A	G	-11.9088	2.3335	3.337e-07	22003
SA_fusiform	rs1269949	T	C	-11.8067	2.3003	2.858e-07	22383
SA_fusiform	rs1273156	T	C	11.8587	2.299	2.492e-07	22383
SA_fusiform	rs2774052	A	G	12.1379	2.2518	7.033e-08	22383
SA_fusiform	rs17255752	A	G	-12.3276	2.2434	3.905e-08	22383
SA_fusiform	rs1272107	A	G	-11.8787	2.3006	2.425e-07	22383
SA_fusiform	rs3850306	A	C	12.4959	2.2438	2.562e-08	22383
SA_fusiform	rs1621722	A	C	12.1488	2.2544	7.085e-08	22383
SA_fusiform	rs1253187	A	G	-11.8689	2.3007	2.484e-07	22383
SA_fusiform	rs1253188	A	G	12.1251	2.2547	7.54e-08	22383
SA_fusiform	rs1268590	A	G	-11.8953	2.3007	2.338e-07	22383
SA_fusiform	rs1272108	A	G	-11.9055	2.3163	2.748e-07	22383
SA_fusiform	rs1268591	T	G	11.8924	2.3012	2.367e-07	22383
SA_fusiform	rs12890494	T	C	-12.3036	2.2451	4.246e-08	22383
SA_fusiform	rs2769278	T	C	11.882	2.301	2.418e-07	22383
SA_fusiform	rs1755714	T	G	11.3885	2.3446	1.19e-06	22003
SA_fusiform	rs1752408	A	G	10.6369	2.3157	4.36e-06	22003
SA_fusiform	rs9672051	C	G	10.5531	2.2789	3.642e-06	22383
SA_fusiform	rs1253136	T	C	-10.6476	2.278	2.951e-06	22383
SA_fusiform	14:59942954:C_CA	i	r	12.0679	2.4866	1.214e-06	19904
SA_fusiform	rs12442590	A	G	-13.4406	2.8797	3.05e-06	19384
SA_fusiform	rs11858867	A	G	-13.2661	2.8635	3.606e-06	19384
SA_fusiform	rs6493442	T	C	13.1562	2.8591	4.196e-06	19384
SA_fusiform	rs12909252	A	G	-13.3569	2.8738	3.354e-06	19384
SA_fusiform	rs12915259	T	C	13.8181	2.888	1.713e-06	19384
SA_fusiform	rs12916594	T	C	-13.3966	2.8622	2.861e-06	19384
SA_fusiform	rs144618127	A	C	28.8267	6.2642	4.189e-06	22383
SA_fusiform	rs79884087	T	C	28.6578	6.2735	4.922e-06	22383
SA_fusiform	rs35254155	C	G	-11.9151	2.519	2.244e-06	22383
SA_fusiform	rs4577147	T	C	-12.0702	2.5381	1.979e-06	22383
SA_fusiform	rs62067482	A	G	11.9967	2.5276	2.072e-06	22383
SA_fusiform	rs62067483	T	C	11.998	2.528	2.075e-06	22383
SA_fusiform	rs12946508	A	T	-11.925	2.5278	2.387e-06	22383
SA_fusiform	rs4925071	T	C	-11.7103	2.4814	2.368e-06	22383
SA_fusiform	rs4924802	T	G	11.4788	2.4691	3.336e-06	22383
SA_fusiform	rs3862151	A	G	-11.5925	2.4653	2.572e-06	22383
SA_fusiform	rs35317166	A	T	11.4687	2.4665	3.322e-06	22383
SA_fusiform	rs17759041	A	G	-11.5803	2.4651	2.63e-06	22383
SA_fusiform	rs56371654	T	G	11.4654	2.4668	3.352e-06	22383
SA_fusiform	rs4925074	T	C	11.5696	2.465	2.685e-06	22383
SA_fusiform	rs35915823	A	G	-11.4884	2.4619	3.065e-06	22383
SA_fusiform	rs12937327	T	C	11.52	2.4613	2.863e-06	22383
SA_fusiform	rs17759609	C	G	11.5462	2.4661	2.843e-06	22383
SA_fusiform	17:20002490:TTA_T	d	r	12.378	2.6332	2.592e-06	19544
SA_fusiform	rs200719495	d	r	11.8972	2.5196	2.338e-06	21643
SA_fusiform	17:43493834:T_TC	i	r	-21.8293	4.529	1.436e-06	13831
SA_fusiform	rs12936645	A	T	20.5901	4.2391	1.19e-06	15153
SA_fusiform	rs35420583	T	C	-16.8484	3.6722	4.474e-06	20009
SA_fusiform	rs34792542	A	G	16.8528	3.6713	4.423e-06	20009
SA_fusiform	17:43502012	T	C	16.1043	3.375	1.827e-06	20169
SA_fusiform	rs199883901	i	r	-23.677	4.4632	1.127e-07	15153
SA_fusiform	rs55642947	C	G	-14.7506	3.2145	4.46e-06	21231
SA_fusiform	rs11012	T	C	-14.6742	3.1987	4.484e-06	21231
SA_fusiform	rs62064654	T	C	-14.6802	3.2114	4.849e-06	21231
SA_fusiform	rs34363898	T	C	-14.9515	3.2446	4.063e-06	20851
SA_fusiform	rs17631303	A	G	14.8013	3.2213	4.332e-06	21231
SA_fusiform	rs35591873	A	G	-15.4827	3.2902	2.53e-06	20851
SA_fusiform	rs34887474	A	C	-15.0108	3.2661	4.307e-06	20851
SA_fusiform	17:43522775_TTGTG_T	d	r	-15.9135	3.4074	3.009e-06	20851
SA_fusiform	rs149182889	i	r	-15.0367	3.2809	4.582e-06	20851
SA_fusiform	17:43525346_TAG_T	d	r	-15.0494	3.2929	4.871e-06	20851
SA_fusiform	rs62065380	T	C	-15.0607	3.2982	4.963e-06	20851
SA_fusiform	rs2960000	T	C	15.8341	3.3896	2.992e-06	21231
SA_fusiform	rs79730878	T	C	17.651	3.4737	3.747e-07	18526
SA_fusiform	rs62055945	A	G	-17.4551	3.4441	4.019e-07	18526
SA_fusiform	rs62055946	A	C	-17.4439	3.4399	3.957e-07	18526
SA_fusiform	rs62055947	T	C	-17.4136	3.4377	4.072e-07	18526
SA_fusiform	rs62055948	T	C	17.4129	3.4363	4.033e-07	18526
SA_fusiform	rs113871181	A	G	-17.438	3.4345	3.827e-07	18526
SA_fusiform	rs111370985	T	C	17.4338	3.433	3.807e-07	18526
SA_fusiform	rs55787105	A	G	-17.3793	3.4306	4.063e-07	18526
SA_fusiform	rs62055950	T	C	17.3639	3.4289	4.106e-07	18526
SA_fusiform	rs56043078	T	G	17.3622	3.4262	4.032e-07	18526
SA_fusiform	rs77965652	A	G	17.3293	3.4246	4.187e-07	18526
SA_fusiform	rs55849949	A	G	17.3351	3.4234	4.112e-07	18526
SA_fusiform	17:43853922	A	G	-17.3298	3.4165	3.93e-07	18526
SA_fusiform	rs55991914	T	C	-17.2615	3.4116	4.2e-07	18526
SA_fusiform	rs62055955	A	G	17.2317	3.4101	4.345e-07	18526
SA_fusiform	rs62055956	T	C	-17.2329	3.4091	4.304e-07	18526
SA_fusiform	rs62055957	A	C	-17.2192	3.4069	4.321e-07	18526
SA_fusiform	rs34186148	C	G	-14.1398	2.9345	1.447e-06	18733
SA_fusiform	rs4074462	T	G	-17.085	3.4023	5.124e-07	18526
SA_fusiform	rs6503450	T	C	-12.9475	2.7876	3.407e-06	19824
SA_fusiform	rs111735741	A	G	-16.8054	3.3368	4.744e-07	19116
SA_fusiform	rs35076622	A	G	-13.828	2.8816	1.596e-06	18733
SA_fusiform	rs62057061	C	G	16.7274	3.2819	3.453e-07	19496
SA_fusiform	rs62057062	A	G	-16.7218	3.2813	3.469e-07	19496
SA_fusiform	rs62057063	T	C	-16.8497	3.3099	3.568e-07	19496
SA_fusiform	rs62057064	T	C	-16.6976	3.2782	3.515e-07	19496
SA_fusiform	rs76830096	A	C	16.6852	3.2757	3.513e-07	19496
SA_fusiform	rs62057065	T	G	-16.7868	3.2905	3.367e-07	19496
SA_fusiform	rs62057066	T	C	16.75	3.3709	6.732e-07	19116
SA_fusiform	rs62057067	T	C	-16.8905	3.3077	3.284e-07	19496
SA_fusiform	rs78917495	T	C	-16.6737	3.2451	2.775e-07	19725
SA_fusiform	rs62057068	A	G	16.6565	3.2426	2.796e-07	19725
SA_fusiform	rs62057069	T	C	16.6731	3.2407	2.676e-07	19725
SA_fusiform	rs62057070	A	G	16.6416	3.2287	2.546e-07	19725
SA_fusiform	rs62057071	C	G	16.6279	3.2282	2.593e-07	19725
SA_fusiform	rs145503157	i	r	-16.6722	3.2756	3.583e-07	19345
SA_fusiform	rs62057073	T	C	-16.4231	3.2956	6.247e-07	19496
SA_fusiform	rs56319902	T	C	-16.1976	3.1583	2.919e-07	19725
SA_fusiform	rs55943044	A	G	-16.1581	3.1567	3.078e-07	19725
SA_fusiform	rs80184151	A	G	16.0899	3.123	2.575e-07	19725
SA_fusiform	rs17689378	T	C	-16.1187	3.1131	2.247e-07	19725
SA_fusiform	rs62057101	A	G	-16.1223	3.1048	2.072e-07	19725
SA_fusiform	rs62057103	T	C	16.0529	3.1016	2.271e-07	19725
SA_fusiform	rs55915917	T	G	16.8233	3.232	1.937e-07	19725
SA_fusiform	rs55668363	A	G	-16.7047	3.2348	2.416e-07	19725
SA_fusiform	rs17689471	T	C	16.0961	3.0896	1.891e-07	19725
SA_fusiform	17:43893146:CCCAG	d	r	-16.4927	3.226	3.18e-07	19345
SA_fusiform	rs117365970	A	G	-16.8129	3.2426	2.16e-07	19725
SA_fusiform	rs117646503	T	C	16.9798	3.2375	1.566e-07	19725
SA_fusiform	rs17762769	A	G	-15.9451	3.0893	2.451e-07	19725
SA_fusiform	rs8072451	T	C	-15.9337	3.0883	2.477e-07	19725
SA_fusiform	rs8073146	A	G	15.944	3.0881	2.431e-07	19725
SA_fusiform	17:43893766:TCTGC	d	r	-16.7661	3.6606	4.646e-06	17583
SA_fusiform	17:43893772:TGCCT	d	r	-16.701	3.6433	4.561e-06	17583
SA_fusiform	rs28364025	T	C	15.987	3.0866	2.225e-07	19725
SA_fusiform	rs28364023	T	C	-15.933	3.0874	2.461e-07	19725
SA_fusiform	rs55757142	i	r	-15.9421	3.1578	4.452e-07	19345
SA_fusiform	rs55779147	A	G	-15.9774	3.0985	2.516e-07	19725
SA_fusiform	rs56357543	T	C	-15.9637	3.0982	2.57e-07	19725
[truncated: 22,878 more rows]

## Sheet: Gglobal cortex
Supplementary Table . GWAS summary data of global cortex at P-value<5.0×10-6
Cortical regions	rsID	Effect allele	Other allele	Beta	SE	P-value	N
Full_SurfArea	1:7802192:C_CAT	I	R	-712.043	153.223	3.366e-06	20859
Full_SurfArea	rs34912640	A	C	-1849.61	402.728	4.375e-06	10006
Full_SurfArea	rs3827730	T	C	-681.976	138.379	8.294e-07	22253
Full_SurfArea	rs12031188	T	C	-667.264	140.665	2.099e-06	22253
Full_SurfArea	rs35993240	A	T	-644.818	140.15	4.206e-06	22020
Full_SurfArea	rs12048510	A	G	664.237	143.83	3.871e-06	22020
Full_SurfArea	rs3737880	C	G	-855.211	186.52	4.538e-06	22253
Full_SurfArea	rs3737879	T	C	-852.039	186.544	4.936e-06	22253
Full_SurfArea	rs3006933	A	G	-656.374	136.355	1.481e-06	22061
Full_SurfArea	rs9428576	T	C	-645.593	133.425	1.308e-06	22061
Full_SurfArea	2:60216140	A	T	-1092.51	203.133	7.52e-08	19660
Full_SurfArea	rs10188396	T	C	614.861	134.389	4.757e-06	22253
Full_SurfArea	rs759559680	d	R	-855.955	181.715	2.472e-06	21867
Full_SurfArea	2:61458945:T_TA	I	R	-736.224	157.514	2.954e-06	19660
Full_SurfArea	rs7570830	A	C	-628.459	136.131	3.901e-06	21867
Full_SurfArea	rs77609904	A	G	886.819	184.093	1.456e-06	22253
Full_SurfArea	rs72830570	A	C	877.556	184.163	1.887e-06	22253
Full_SurfArea	rs72830571	A	G	882.362	183.979	1.619e-06	22253
Full_SurfArea	rs17007527	T	C	-884.367	183.994	1.536e-06	22253
Full_SurfArea	rs17007536	A	G	883.33	183.927	1.566e-06	22253
Full_SurfArea	rs1881886	C	G	-885.875	183.912	1.458e-06	22253
Full_SurfArea	rs1881887	A	G	-885.809	183.989	1.476e-06	22253
Full_SurfArea	rs1881888	C	G	-885.022	183.923	1.495e-06	22253
Full_SurfArea	rs1881889	A	G	-883.929	183.952	1.546e-06	22253
Full_SurfArea	rs7424450	A	C	-882.25	183.969	1.622e-06	22253
Full_SurfArea	rs1881892	T	C	-884.356	184.009	1.539e-06	22253
Full_SurfArea	rs1881894	A	G	-868.11	189.651	4.708e-06	22253
Full_SurfArea	rs72830580	A	G	879.87	191.945	4.562e-06	22253
Full_SurfArea	rs58614783	T	C	694.381	144.358	1.508e-06	22253
Full_SurfArea	rs12465237	A	T	-688.536	144.561	1.908e-06	22253
Full_SurfArea	rs56317534	A	G	-706.234	148.223	1.891e-06	22253
Full_SurfArea	rs72960256	A	C	703.466	144.042	1.041e-06	22253
Full_SurfArea	2:160443031_GA_G	d	R	-678.581	145.142	2.936e-06	21867
Full_SurfArea	rs4665089	T	C	-706.08	143.8	9.1e-07	22253
Full_SurfArea	rs66499418	A	G	-706.809	143.661	8.656e-07	22253
Full_SurfArea	rs113542967	T	G	-738.436	149.557	7.914e-07	22253
Full_SurfArea	rs4664290	T	C	-701.356	143.945	1.103e-06	22253
Full_SurfArea	rs56164018	A	G	700.38	143.671	1.089e-06	22253
Full_SurfArea	rs4665094	A	G	-697.366	143.505	1.177e-06	22253
Full_SurfArea	rs12467561	A	G	723.049	146.661	8.22e-07	22253
Full_SurfArea	rs55996124	C	G	701.481	142.685	8.819e-07	22253
Full_SurfArea	rs2162496	T	C	704.683	142.021	6.984e-07	22253
Full_SurfArea	rs56186214	A	G	-697.88	142.387	9.52e-07	22253
Full_SurfArea	rs72959469	A	G	713.141	143.625	6.859e-07	22253
Full_SurfArea	rs2114621	A	G	-693.038	142.095	1.075e-06	22253
Full_SurfArea	rs2114622	T	C	-703.365	142.012	7.313e-07	22253
Full_SurfArea	rs72959491	A	G	-694.445	141.978	1.002e-06	22253
Full_SurfArea	rs17813538	A	G	660.148	139.008	2.044e-06	22253
Full_SurfArea	rs4665109	T	C	-738.92	149.818	8.134e-07	21791
Full_SurfArea	rs763028725	d	R	-653.933	143.018	4.822e-06	21867
Full_SurfArea	rs11555185	T	C	-666.407	138.755	1.565e-06	22253
Full_SurfArea	rs17228775	A	G	662.781	139.162	1.911e-06	22253
Full_SurfArea	rs17815040	A	G	-639.082	139.565	4.67e-06	22253
Full_SurfArea	rs34695240	I	R	-666.812	143.069	3.15e-06	21867
Full_SurfArea	rs2303552	A	C	-654.658	140.071	2.957e-06	22253
Full_SurfArea	rs12478470	T	C	658.408	140.237	2.666e-06	22253
Full_SurfArea	rs6432564	C	G	-665.534	139.946	1.978e-06	22253
Full_SurfArea	rs2738282	A	G	-672.984	141.773	2.065e-06	20895
Full_SurfArea	rs7590302	T	C	-700.829	144.099	1.153e-06	20895
Full_SurfArea	rs12694390	T	C	779.802	155.464	5.277e-07	20895
Full_SurfArea	rs284532	T	G	-631.528	136.794	3.9e-06	20895
Full_SurfArea	rs13023747	T	G	-697.189	144.25	1.344e-06	20895
Full_SurfArea	rs284528	T	C	-688.626	144.136	1.774e-06	20895
Full_SurfArea	rs1983219	T	C	-699.274	144.195	1.238e-06	20895
Full_SurfArea	rs1983218	A	C	-698.374	144.174	1.273e-06	20895
Full_SurfArea	rs284526	A	G	-698.13	132.502	1.373e-07	20895
Full_SurfArea	rs2280043	A	G	696.394	144.201	1.37e-06	20895
Full_SurfArea	rs1110998	T	C	694.208	144.196	1.477e-06	20895
Full_SurfArea	rs2738287	T	C	682.283	143.979	2.15e-06	20895
Full_SurfArea	rs2738290	A	G	682.148	144.042	2.182e-06	20895
Full_SurfArea	rs998102	A	G	-663.19	144.682	4.567e-06	20895
Full_SurfArea	rs12994218	T	C	673.647	145.308	3.552e-06	20895
Full_SurfArea	rs13034451	A	T	670.889	145.439	3.972e-06	20895
Full_SurfArea	rs10194227	A	G	676.428	146.377	3.817e-06	20895
Full_SurfArea	rs13015080	A	G	668.261	146.247	4.891e-06	20895
Full_SurfArea	rs337426	A	G	649.193	139.865	3.458e-06	22253
Full_SurfArea	rs12630663	T	C	-685.979	130.779	1.56e-07	22253
Full_SurfArea	rs7631437	T	C	642.82	128.881	6.11e-07	22253
Full_SurfArea	rs7642794	A	T	-679.59	131.111	2.18e-07	22253
Full_SurfArea	rs7653065	A	G	643.277	128.852	5.964e-07	22253
Full_SurfArea	rs13318273	T	C	-630.108	128.224	8.919e-07	22253
Full_SurfArea	rs11925538	T	C	631.884	128.208	8.283e-07	22253
Full_SurfArea	rs6781471	T	C	630.299	128.121	8.675e-07	22253
Full_SurfArea	rs6805179	A	G	632.208	128.127	8.046e-07	22253
Full_SurfArea	rs9819439	T	C	-632.279	128.132	8.033e-07	22253
Full_SurfArea	rs9825611	T	C	-637.33	128.281	6.757e-07	22253
Full_SurfArea	rs10446454	A	C	-708.297	149.121	2.036e-06	21867
Full_SurfArea	rs11710076	T	C	-661.053	130.109	3.759e-07	22253
Full_SurfArea	rs9847470	A	G	-610.618	128.628	2.063e-06	22253
Full_SurfArea	rs6809622	T	C	-633.161	129.307	9.752e-07	21867
Full_SurfArea	rs6807285	A	G	-621.91	128.634	1.333e-06	22253
Full_SurfArea	rs2371164	T	C	-626.402	128.398	1.068e-06	22253
Full_SurfArea	rs2371165	A	G	-625.322	128.404	1.116e-06	22253
Full_SurfArea	rs9864052	A	C	-625.042	128.533	1.157e-06	22253
Full_SurfArea	rs17020711	T	C	-669.038	145.488	4.254e-06	22253
Full_SurfArea	rs9637525	A	G	664.558	130.938	3.867e-07	22253
Full_SurfArea	rs6775111	T	C	-622.198	128.643	1.321e-06	22253
Full_SurfArea	rs1506690	T	C	622.143	128.652	1.326e-06	22253
Full_SurfArea	rs1506689	T	C	-624.642	128.74	1.223e-06	22253
Full_SurfArea	rs1395408	T	C	619.331	129.373	1.692e-06	22253
Full_SurfArea	rs7646902	T	C	760.339	166.006	4.645e-06	22253
Full_SurfArea	rs6805783	A	G	-764.786	166.463	4.341e-06	22253
Full_SurfArea	rs6808218	T	G	-760.17	166.42	4.929e-06	22253
Full_SurfArea	rs59015880	A	T	764.087	166.479	4.439e-06	22253
Full_SurfArea	rs55717954	T	C	761.548	166.442	4.752e-06	22253
Full_SurfArea	rs2177222	A	G	-785.221	167.906	2.917e-06	22253
Full_SurfArea	rs10512789	T	C	-775.871	160.136	1.266e-06	22253
Full_SurfArea	rs10690884	I	R	-751.346	162.584	3.814e-06	21867
Full_SurfArea	rs4234470	T	C	899.898	181.878	7.505e-07	21893
Full_SurfArea	3:141631043_AT_A	d	R	-957.587	175.833	5.152e-08	21867
Full_SurfArea	rs1529580	C	G	-947.014	174.255	5.491e-08	22253
Full_SurfArea	rs9810697	A	G	965.3	174.825	3.36e-08	22253
Full_SurfArea	rs6762767	T	C	967.308	174.725	3.091e-08	22253
Full_SurfArea	rs4683410	T	G	965.467	174.705	3.271e-08	22253
Full_SurfArea	rs6769618	A	G	966.117	174.598	3.141e-08	22253
Full_SurfArea	rs4683648	T	C	950.802	175.237	5.769e-08	22253
Full_SurfArea	rs12695746	T	G	974.079	174.226	2.259e-08	22253
Full_SurfArea	rs2902146	T	C	970.249	174.694	2.792e-08	22253
Full_SurfArea	rs9856495	A	G	944.568	175.361	7.187e-08	22253
Full_SurfArea	rs1976634	T	C	1014.64	177.184	1.025e-08	22253
Full_SurfArea	rs1976633	A	G	1012.6	177.19	1.099e-08	22253
Full_SurfArea	rs5742111	I	R	-938.806	173.299	6.052e-08	21867
Full_SurfArea	rs6440053	A	T	-1103.87	176.571	4.061e-10	22253
Full_SurfArea	rs10804681	A	T	1103.67	177.082	4.589e-10	22253
Full_SurfArea	rs1045279	T	C	-1159.81	181.049	1.494e-10	22253
Full_SurfArea	rs9942	A	G	1174.45	180.906	8.468e-11	22253
Full_SurfArea	3:141664025_CA_C	d	R	-1134.37	181.258	3.891e-10	21867
Full_SurfArea	rs9815587	A	C	-1242.84	184.072	1.459e-11	22061
Full_SurfArea	rs13081914	T	C	-1220.74	183.115	2.62e-11	22061
Full_SurfArea	rs6440054	A	T	1242.14	185.829	2.32e-11	22061
Full_SurfArea	3:141684843:G_GT	I	R	1253.99	192.72	7.678e-11	20446
Full_SurfArea	rs34773643	T	C	1266.26	186.473	1.117e-11	22061
Full_SurfArea	rs12330323	A	C	805.791	174.529	3.894e-06	21867
Full_SurfArea	rs11569256	C	G	-1293.58	188.253	6.353e-12	22061
Full_SurfArea	rs2861421	T	C	1305.42	187.793	3.617e-12	22061
Full_SurfArea	rs3804771	A	G	982.788	202.598	1.229e-06	18907
Full_SurfArea	rs2901949	A	G	1153.01	242.957	2.077e-06	21278
Full_SurfArea	rs4315664	A	T	-1295.02	186.402	3.719e-12	22061
Full_SurfArea	rs4315665	T	C	1304.73	186.45	2.602e-12	22061
Full_SurfArea	rs34092379	A	G	-1299.97	184.771	1.985e-12	22061
Full_SurfArea	rs62283130	C	G	692.301	148.918	3.337e-06	22253
Full_SurfArea	rs11569216	A	G	-1291.99	184.562	2.555e-12	22061
Full_SurfArea	rs34486172	T	C	1313.73	184.89	1.199e-12	22061
Full_SurfArea	rs73230678	T	C	1645.7	357.383	4.127e-06	22061
Full_SurfArea	rs12495978	T	G	-1287.06	183.758	2.485e-12	22061
Full_SurfArea	rs3811708	T	G	1322.8	184.159	6.824e-13	22061
Full_SurfArea	rs62283132	T	C	1326.84	184.09	5.696e-13	22061
Full_SurfArea	rs2271386	A	G	1348.03	181.949	1.274e-13	22061
Full_SurfArea	rs3817176	T	C	1351.44	182.067	1.147e-13	22061
Full_SurfArea	rs11569198	A	G	-1342.37	181.75	1.515e-13	22061
Full_SurfArea	rs2063454	T	C	-1339.26	181.668	1.68e-13	22061
Full_SurfArea	rs2063453	T	C	-1342.79	181.684	1.459e-13	22061
Full_SurfArea	rs1511299	T	C	-704.918	147.945	1.891e-06	22253
Full_SurfArea	rs34514405	A	G	-1340.02	181.668	1.629e-13	22061
Full_SurfArea	rs35787200	C	G	1342.91	181.708	1.463e-13	22061
Full_SurfArea	rs34186890	A	G	-706.434	147.668	1.719e-06	22061
Full_SurfArea	rs35597264	T	C	1310.3	183.065	8.212e-13	21675
Full_SurfArea	rs34464850	C	G	1345.62	181.559	1.249e-13	22061
Full_SurfArea	rs2861422	T	C	696.249	146.025	1.86e-06	22061
Full_SurfArea	rs748784866	d	R	1236.06	178.393	4.242e-12	22084
Full_SurfArea	rs34909530	I	R	1257	182.783	6.112e-12	22084
Full_SurfArea	rs34579489	A	G	1199	175.854	9.222e-12	22470
Full_SurfArea	rs56129773	A	G	1220.68	176.425	4.55e-12	22470
Full_SurfArea	rs35486283	A	T	1224.42	176.307	3.789e-12	22470
Full_SurfArea	rs6440057	T	C	-724.518	149.658	1.291e-06	22061
Full_SurfArea	rs4683658	T	G	-742.399	147.146	4.527e-07	22061
Full_SurfArea	rs200716315	d	R	-709.883	147.355	1.454e-06	21675
Full_SurfArea	rs13069749	T	C	-1217.67	177.444	6.779e-12	22084
Full_SurfArea	rs907293	T	C	-1210.4	175.67	5.572e-12	22470
Full_SurfArea	rs72990266	A	G	-723.029	149.048	1.229e-06	22084
Full_SurfArea	rs6806443	T	C	1167.18	175.246	2.734e-11	22470
Full_SurfArea	rs2862122	T	C	-1210.26	175.472	5.304e-12	22470
Full_SurfArea	rs7619506	A	G	1207.12	174.383	4.446e-12	22470
Full_SurfArea	rs7644155	T	C	-676.809	145.933	3.521e-06	22061
Full_SurfArea	rs7644383	T	C	-681.193	145.321	2.766e-06	22470
Full_SurfArea	rs6803884	A	G	-1202.99	175.335	6.833e-12	22470
Full_SurfArea	rs4683417	T	G	-1210.46	175.353	5.092e-12	22470
Full_SurfArea	rs10665808	I	R	-1232.17	176.887	3.263e-12	22084
Full_SurfArea	3:141745923:T_TAA	I	R	-1153.71	191.834	1.809e-09	19660
Full_SurfArea	3:141746132_AAAT_A	d	R	-698.268	146.876	1.993e-06	21675
Full_SurfArea	rs963396	A	G	-1205.5	175.083	5.766e-12	22470
Full_SurfArea	rs1397764	A	G	683.495	145.494	2.63e-06	22061
Full_SurfArea	rs1820941	T	C	1181.22	178.085	3.292e-11	22470
Full_SurfArea	rs6764833	T	C	-980.532	165.574	3.18e-09	22470
Full_SurfArea	rs6795301	A	G	980.036	165.302	3.052e-09	22470
Full_SurfArea	rs6795500	A	G	980.486	165.425	3.084e-09	22470
Full_SurfArea	rs6440058	A	G	874.797	169.668	2.524e-07	22470
Full_SurfArea	rs6440059	T	C	-897.058	169.251	1.157e-07	22470
Full_SurfArea	rs1543064	T	C	-980.936	165.37	2.997e-09	22470
Full_SurfArea	rs6778085	T	C	-980.917	165.385	3.009e-09	22470
Full_SurfArea	rs9863685	A	G	980.969	165.385	3.003e-09	22470
Full_SurfArea	rs7630837	T	C	-961.969	166.043	6.893e-09	22470
Full_SurfArea	rs7630893	T	C	-725.316	146.027	6.799e-07	22061
Full_SurfArea	rs7633321	T	G	-976.223	165.264	3.483e-09	22470
Full_SurfArea	rs9880805	A	G	979.925	165.2	2.997e-09	22470
Full_SurfArea	rs6440060	A	T	713.136	144.652	8.223e-07	22470
Full_SurfArea	rs7638352	T	C	1011.22	166.164	1.16e-09	22470
Full_SurfArea	rs9289641	A	G	978.768	165.094	3.056e-09	22470
Full_SurfArea	3:141765427:CGTTG	d	R	-976.253	167.56	5.668e-09	22084
Full_SurfArea	rs9865777	T	C	975.933	164.955	3.292e-09	22470
Full_SurfArea	rs6791514	C	G	720.516	144.566	6.228e-07	22061
Full_SurfArea	rs1355438	T	C	-713.687	144.766	8.226e-07	22061
Full_SurfArea	rs2862123	T	C	-968.828	164.856	4.182e-09	22470
Full_SurfArea	3:141769121:AT_A	d	R	-922.517	177.415	1.995e-07	19660
Full_SurfArea	rs7612958	A	T	-965.566	170.518	1.492e-08	22084
Full_SurfArea	3:141769693_AAATC_A	d	R	-722.994	145.918	7.241e-07	21675
Full_SurfArea	rs2862124	T	C	-968.461	164.914	4.292e-09	22470
Full_SurfArea	rs2862125	T	G	-960.626	163.985	4.684e-09	22470
Full_SurfArea	rs1705624	A	G	-679.207	145.667	3.12e-06	22061
Full_SurfArea	rs9865413	T	C	-674.129	145.816	3.779e-06	22061
Full_SurfArea	rs347692	T	G	-693.574	144.684	1.637e-06	22061
Full_SurfArea	rs347678	T	C	-785.346	152.809	2.756e-07	22061
Full_SurfArea	rs1704985	A	G	-689.224	144.611	1.879e-06	22061
Full_SurfArea	rs1705607	T	C	-687.601	144.572	1.973e-06	22061
Full_SurfArea	rs347685	A	C	-694.117	144.512	1.562e-06	22061
Full_SurfArea	rs347686	A	C	-685.925	144.508	2.068e-06	22061
Full_SurfArea	rs1705614	T	C	-680.732	144.693	2.543e-06	22061
Full_SurfArea	rs9877817	A	G	-689.275	144.637	1.884e-06	22061
Full_SurfArea	rs7640665	A	G	-698.519	148.684	2.627e-06	21675
Full_SurfArea	3:141824805_AG_A	d	R	-690.501	146.013	2.256e-06	21675
Full_SurfArea	rs9857917	T	C	685.667	144.715	2.158e-06	22061
Full_SurfArea	3:141824954_TG_T	d	R	-697.249	146.593	1.971e-06	22084
Full_SurfArea	rs6773343	T	C	-680.265	144.858	2.652e-06	22061
Full_SurfArea	rs10049894	T	C	-1159.08	252.746	4.52e-06	20293
Full_SurfArea	rs187590743	A	T	-3587.38	769.163	3.101e-06	17919
Full_SurfArea	rs16894917	T	C	-753.646	163.503	4.039e-06	22253
Full_SurfArea	rs73230793	T	C	-743.934	162.849	4.918e-06	22253
Full_SurfArea	rs2301718	A	G	721.551	154.196	2.876e-06	22253
Full_SurfArea	rs116623451	A	C	2457.44	511.338	1.541e-06	20044
Full_SurfArea	5:134947314_ATCGTT_A	d	R	-4421.14	965.432	4.662e-06	11134
Full_SurfArea	rs6555948	A	G	-622.609	135.069	4.035e-06	22145
Full_SurfArea	rs34772405	T	C	602.245	131.466	4.628e-06	22145
Full_SurfArea	rs4302608	A	G	-596.76	130.658	4.939e-06	22145
Full_SurfArea	rs12333007	T	C	-692.387	151.611	4.951e-06	22253
Full_SurfArea	rs9369294	A	G	-1590.83	327.084	1.152e-06	21523
Full_SurfArea	rs1887079	T	C	-1556.02	327.376	2.004e-06	21523
Full_SurfArea	rs1575676	T	C	-681.505	134.115	3.744e-07	22253
Full_SurfArea	rs9384679	T	C	-675.288	132.569	3.509e-07	22253
Full_SurfArea	rs6911407	A	C	-665.493	132.174	4.779e-07	22253
Full_SurfArea	rs768023	A	G	684.065	132.725	2.55e-07	22253
Full_SurfArea	6:108880910:GGCCC	d	R	-753.71	155.31	1.216e-06	19660
Full_SurfArea	rs2764265	T	C	709.429	138.802	3.203e-07	22253
Full_SurfArea	rs2490272	T	C	700.131	132.911	1.382e-07	22253
Full_SurfArea	rs2802288	A	G	-695.86	132.707	1.575e-07	22253
Full_SurfArea	rs2802290	A	G	701.248	132.867	1.307e-07	22253
Full_SurfArea	rs2802292	T	G	704.517	132.999	1.176e-07	22253
Full_SurfArea	rs2802295	A	G	-713.996	133.86	9.613e-08	22253
Full_SurfArea	rs2764261	A	G	-703.527	134.045	1.534e-07	22253
Full_SurfArea	rs4897163	T	C	-619.469	133.541	3.504e-06	21624
Full_SurfArea	rs9388462	T	G	612.883	133.506	4.418e-06	21624
Full_SurfArea	rs6925412	A	G	-737.082	134.191	3.956e-08	21984
Full_SurfArea	rs62426379	A	G	-777.202	135.628	1.002e-08	21984
Full_SurfArea	rs941457	C	G	662.779	144.645	4.603e-06	21984
Full_SurfArea	rs9401858	T	G	714.367	131.929	6.136e-08	21984
Full_SurfArea	rs4897167	A	C	697.338	131.22	1.071e-07	21751
Full_SurfArea	rs2875871	A	G	-706.765	130.261	5.771e-08	21984
Full_SurfArea	rs10872306	A	G	701.734	130.49	7.545e-08	21984
Full_SurfArea	rs9375421	T	C	-712.839	129.899	4.073e-08	21984
Full_SurfArea	rs6900796	T	C	-723.222	130.252	2.816e-08	21984
Full_SurfArea	rs7753399	T	C	-719.984	130.321	3.301e-08	21984
Full_SurfArea	rs4897168	T	G	712.936	130.238	4.398e-08	21984
Full_SurfArea	rs1465104	A	G	724.618	130.614	2.893e-08	21984
Full_SurfArea	rs9398794	A	G	-724.328	131.45	3.582e-08	21984
Full_SurfArea	rs1569741	A	G	719.66	132.013	4.997e-08	21984
Full_SurfArea	rs2179750	A	G	699.378	139.978	5.842e-07	21984
Full_SurfArea	rs11154343	T	C	-784.363	149.059	1.424e-07	21624
Full_SurfArea	rs11963634	A	G	862.27	156.435	3.547e-08	21624
Full_SurfArea	rs9401874	T	G	615.709	132.24	3.224e-06	21647
Full_SurfArea	rs10499135	A	G	-623.243	132.258	2.449e-06	21647
Full_SurfArea	rs1338840	A	G	620.738	131.392	2.309e-06	21647
Full_SurfArea	rs9372836	T	C	625.91	131.492	1.935e-06	21647
Full_SurfArea	rs1455738	A	G	-606.823	130.534	3.339e-06	21647
Full_SurfArea	rs7771057	T	G	-640.569	137.193	3.025e-06	19777
Full_SurfArea	rs9372837	A	G	605.218	130.341	3.428e-06	21647
Full_SurfArea	rs1591806	A	G	-614.442	130.565	2.526e-06	21647
Full_SurfArea	rs970403	A	G	612.249	130.732	2.824e-06	21647
Full_SurfArea	rs1455737	T	G	-607.736	130.694	3.318e-06	21647
Full_SurfArea	rs6904938	A	G	-647.74	134.283	1.409e-06	21647
Full_SurfArea	rs9388485	A	C	-620.828	132.657	2.869e-06	21647
Full_SurfArea	rs9385396	A	G	614.6	131.088	2.753e-06	21647
Full_SurfArea	rs1378579	A	C	627.169	131.216	1.756e-06	21647
Full_SurfArea	rs4897175	A	G	-651.045	135.694	1.603e-06	21647
Full_SurfArea	rs6919397	T	G	-677.568	131.206	2.415e-07	21984
Full_SurfArea	rs9388486	T	C	-671.282	131.171	3.094e-07	21984
Full_SurfArea	rs9375435	T	C	675.56	131.836	2.987e-07	21984
Full_SurfArea	rs17754780	T	C	684.556	131.081	1.766e-07	21984
Full_SurfArea	rs6907898	T	C	673.148	131.007	2.773e-07	21984
Full_SurfArea	rs9401876	A	C	671.266	131.271	3.161e-07	21984
Full_SurfArea	rs2045258	A	G	-676.067	130.659	2.288e-07	21984
Full_SurfArea	rs9388487	T	G	654.668	131.915	6.948e-07	21751
Full_SurfArea	rs2326387	A	G	683.683	130.505	1.617e-07	21984
Full_SurfArea	rs9398803	A	G	-652.733	131.127	6.429e-07	21984
Full_SurfArea	rs9388489	A	G	-672.062	129.647	2.174e-07	21984
Full_SurfArea	6:126699049:GT_G	d	R	898.567	170.935	1.466e-07	19391
Full_SurfArea	6:126699054:GA_G	d	R	868.516	161.79	7.953e-08	19391
Full_SurfArea	rs1361262	T	C	-668.32	130.114	2.8e-07	21984
Full_SurfArea	rs9388490	T	C	798.222	131.914	1.439e-09	21984
Full_SurfArea	rs9398805	T	C	634.683	130.042	1.058e-06	21984
Full_SurfArea	rs4897179	A	G	667.754	132.598	4.755e-07	21984
Full_SurfArea	rs576049	T	G	-649.597	131.653	8.05e-07	21598
Full_SurfArea	rs9321065	A	G	645.461	130.169	7.099e-07	21984
Full_SurfArea	rs2039735	T	C	-651.56	131.999	7.971e-07	21984
Full_SurfArea	rs1538172	A	G	-636.238	130	9.873e-07	21984
Full_SurfArea	rs9401881	T	C	634.879	130.02	1.045e-06	21984
Full_SurfArea	rs4565329	T	C	636.674	130.021	9.746e-07	21984
Full_SurfArea	rs1538170	T	C	634.591	130.064	1.066e-06	21984
Full_SurfArea	rs4897181	T	C	639.9	130.001	8.555e-07	21984
Full_SurfArea	rs9401882	A	G	-634.856	130.029	1.048e-06	21984
Full_SurfArea	rs4897182	T	G	-642.714	130.021	7.687e-07	21984
Full_SurfArea	rs9398808	T	G	632.404	130.022	1.151e-06	21984
Full_SurfArea	rs9385399	T	G	638.879	130.045	8.981e-07	21984
Full_SurfArea	rs1415671	T	G	-637.493	130.019	9.434e-07	21984
Full_SurfArea	rs2184968	T	C	-636.01	130.227	1.04e-06	21984
Full_SurfArea	rs2152876	A	G	637.557	130.083	9.528e-07	21984
Full_SurfArea	rs9385400	T	G	-632.479	130.147	1.175e-06	21984
Full_SurfArea	rs1361107	A	C	-632.101	130.271	1.221e-06	21984
Full_SurfArea	rs1361108	T	C	639.831	130.126	8.788e-07	21984
Full_SurfArea	rs1361109	T	C	641.069	130.133	8.382e-07	21984
Full_SurfArea	rs1572569	A	G	641.331	130.175	8.363e-07	21984
Full_SurfArea	rs2184967	T	C	632.59	130.236	1.19e-06	21984
Full_SurfArea	rs4559102	A	G	639.81	130.204	8.928e-07	21984
Full_SurfArea	rs9388494	T	G	636.975	130.622	1.08e-06	21984
Full_SurfArea	rs9375441	A	G	633.804	130.259	1.14e-06	21984
Full_SurfArea	rs4895808	T	C	632.192	130.278	1.218e-06	21984
Full_SurfArea	rs9388495	A	G	644.403	130.302	7.596e-07	21984
Full_SurfArea	rs9388496	A	G	-650.366	130.242	5.929e-07	21984
Full_SurfArea	rs1844594	A	G	654.878	130.282	4.992e-07	21984
Full_SurfArea	rs9398809	T	C	643.953	130.248	7.651e-07	21984
Full_SurfArea	rs9385401	T	C	644.522	130.241	7.471e-07	21984
Full_SurfArea	rs11759026	A	G	-1242.9	161.591	1.453e-14	21984
Full_SurfArea	rs9401883	A	G	-647.523	130.182	6.559e-07	21984
Full_SurfArea	rs1159619	A	C	645.582	130.128	7.008e-07	21984
Full_SurfArea	rs9375442	A	C	-655.53	130.276	4.857e-07	21984
Full_SurfArea	rs2050644	A	G	-645.926	130.088	6.86e-07	21984
Full_SurfArea	rs4422634	T	C	-658.588	130.032	4.088e-07	21984
Full_SurfArea	rs1120786	T	G	-649.205	130.47	6.495e-07	21984
Full_SurfArea	rs9372839	A	G	646.47	130.359	7.08e-07	21984
Full_SurfArea	rs9398810	A	C	653.091	130.044	5.112e-07	21984
Full_SurfArea	rs4418209	T	G	-647.588	130.086	6.419e-07	21984
Full_SurfArea	rs9372840	A	C	-649.788	130.08	5.874e-07	21984
Full_SurfArea	6:126825882:CTTAT	d	R	863.673	162.598	1.086e-07	19391
Full_SurfArea	rs2130603	A	C	-667.857	130.582	3.146e-07	21984
Full_SurfArea	rs7738135	A	G	660.262	130.649	4.333e-07	21984
Full_SurfArea	rs4053271	T	C	-661.026	130.649	4.203e-07	21984
Full_SurfArea	rs1490387	A	C	657.192	130.326	4.59e-07	21984
Full_SurfArea	rs9375446	A	G	656.976	130.33	4.635e-07	21984
Full_SurfArea	rs1490388	T	C	657.991	130.336	4.454e-07	21984
Full_SurfArea	rs1907067	A	C	-660.525	130.403	4.078e-07	21984
Full_SurfArea	rs1602278	A	C	-672.066	131.16	2.991e-07	21751
Full_SurfArea	rs1490384	T	C	745.909	129.982	9.548e-09	21984
Full_SurfArea	rs6925689	T	C	-694.664	132.199	1.483e-07	21984
Full_SurfArea	rs1155939	A	C	697.245	130.105	8.363e-08	21984
Full_SurfArea	rs1155938	A	C	700.645	130.024	7.102e-08	21984
Full_SurfArea	rs58321169	T	C	1088	164.356	3.598e-11	21369
Full_SurfArea	rs9375447	A	G	-682.364	129.685	1.427e-07	21984
Full_SurfArea	rs1490385	T	C	673.365	130.349	2.393e-07	21984
Full_SurfArea	rs9401888	A	G	-680.237	129.544	1.513e-07	21984
Full_SurfArea	rs9401890	A	G	-697.983	131.112	1.018e-07	21984
Full_SurfArea	rs6931369	T	C	666.072	129.741	2.839e-07	21984
Full_SurfArea	rs9401891	T	G	674.13	130.312	2.301e-07	21984
Full_SurfArea	rs9401892	A	G	680.663	129.458	1.458e-07	21984
Full_SurfArea	rs4621655	A	G	680.484	129.457	1.469e-07	21984
Full_SurfArea	rs4621657	A	G	680.456	129.454	1.469e-07	21984
Full_SurfArea	rs1844593	A	G	679.715	129.585	1.56e-07	21984
Full_SurfArea	rs3861455	A	C	-673.172	129.457	1.993e-07	21984
Full_SurfArea	rs9372841	A	G	-673.952	129.463	1.932e-07	21984
Full_SurfArea	rs3861456	A	G	-673.888	129.464	1.938e-07	21984
Full_SurfArea	rs3861457	T	C	-681.332	129.526	1.439e-07	21984
Full_SurfArea	rs9388501	T	C	-681.363	129.53	1.438e-07	21984
Full_SurfArea	rs9401893	A	G	-679.786	129.459	1.513e-07	21984
Full_SurfArea	rs9388502	A	G	675.561	129.769	1.931e-07	21984
Full_SurfArea	rs3861458	A	G	670.82	129.384	2.163e-07	21984
Full_SurfArea	rs9388503	A	G	-653.538	132.883	8.738e-07	21598
Full_SurfArea	rs9372842	T	C	-675.682	129.32	1.743e-07	21984
Full_SurfArea	rs1826189	T	C	664.243	129.345	2.815e-07	21984
Full_SurfArea	rs9482757	A	C	-672.245	129.284	1.995e-07	21984
Full_SurfArea	rs12208811	T	G	-663.496	129.281	2.864e-07	21984
Full_SurfArea	rs7743860	T	G	-663.491	129.276	2.861e-07	21984
Full_SurfArea	rs4584000	T	C	-673.224	129.271	1.91e-07	21984
Full_SurfArea	rs6914367	T	C	685.006	129.795	1.309e-07	21984
Full_SurfArea	rs7738836	A	G	-682.285	130.018	1.541e-07	21984
Full_SurfArea	rs4339479	A	G	673.87	129.403	1.914e-07	21984
Full_SurfArea	rs4629707	T	C	-669.022	129.345	2.311e-07	21984
Full_SurfArea	rs4243491	T	C	-665.654	129.524	2.759e-07	21984
Full_SurfArea	rs9401897	A	G	-670.053	129.706	2.392e-07	21984
Full_SurfArea	rs9491653	A	G	-673.025	129.694	2.111e-07	21984
Full_SurfArea	rs13207431	T	C	681.265	138.747	9.102e-07	21598
Full_SurfArea	rs1340952	T	C	697.459	129.938	7.977e-08	21984
Full_SurfArea	rs1340953	A	G	-687.464	129.728	1.163e-07	21984
Full_SurfArea	rs1417572	T	C	-695.35	130.045	8.943e-08	21984
Full_SurfArea	rs9375449	T	C	-678.992	129.71	1.652e-07	21984
Full_SurfArea	rs1538956	T	G	679.305	129.703	1.629e-07	21984
Full_SurfArea	rs4273712	A	G	-1169.86	148.14	2.857e-15	21624
Full_SurfArea	rs4626447	A	G	677.615	129.732	1.759e-07	21984
Full_SurfArea	rs4549631	T	C	-683.28	129.663	1.367e-07	21984
Full_SurfArea	rs9388507	A	C	674.389	129.72	2.006e-07	21984
Full_SurfArea	rs3905044	A	G	-674.44	129.758	2.018e-07	21984
Full_SurfArea	rs6911485	A	G	-673.66	129.819	2.112e-07	21984
Full_SurfArea	rs4895813	T	G	674.863	129.821	2.01e-07	21984
Full_SurfArea	rs1262474	C	G	705.097	152.601	3.828e-06	21984
Full_SurfArea	rs6913430	T	G	-681.971	129.897	1.52e-07	21984
Full_SurfArea	rs9375450	A	G	676.731	130.045	1.952e-07	21984
Full_SurfArea	rs1262476	A	G	-716.112	152.325	2.586e-06	21984
Full_SurfArea	rs9388509	A	G	679.889	130.132	1.745e-07	21984
Full_SurfArea	rs6918725	T	G	-667.687	132.406	4.59e-07	21984
Full_SurfArea	rs8180649	T	C	-685.242	130.34	1.462e-07	21984
Full_SurfArea	rs6925607	T	C	676.947	132.977	3.567e-07	21984
Full_SurfArea	rs6912198	A	G	-738.85	141.18	1.664e-07	21598
Full_SurfArea	rs7750293	T	C	671.716	133.294	4.671e-07	21598
Full_SurfArea	rs9398814	A	G	-659.811	130.826	4.573e-07	21984
Full_SurfArea	rs11154367	T	C	-748.488	134.811	2.822e-08	21598
Full_SurfArea	rs4316017	T	G	-742.104	133.87	2.965e-08	21598
Full_SurfArea	rs4473871	A	G	682.487	140.478	1.184e-06	21598
Full_SurfArea	rs3850234	T	G	-697.461	131.863	1.228e-07	21751
Full_SurfArea	rs853961	T	G	-678.817	130.569	2.004e-07	21984
Full_SurfArea	rs6569469	T	C	-683.295	130.706	1.716e-07	21984
Full_SurfArea	rs864937	A	G	-674.609	130.8	2.502e-07	21984
Full_SurfArea	rs853985	T	C	-686.052	131.065	1.655e-07	21984
Full_SurfArea	rs853987	A	G	673.274	130.931	2.716e-07	21984
Full_SurfArea	rs13212044	T	G	-740.009	152.631	1.245e-06	21984
Full_SurfArea	rs853962	T	G	-672.055	130.994	2.891e-07	21984
Full_SurfArea	rs4460221	A	G	-663.939	131.309	4.274e-07	21984
Full_SurfArea	rs1269195	T	C	-664.297	131.098	4.037e-07	21984
Full_SurfArea	rs1262543	A	G	-668.559	131.032	3.356e-07	21984
Full_SurfArea	rs853965	T	C	-661.38	131.503	4.921e-07	21984
Full_SurfArea	rs10484759	T	C	-742.021	154.468	1.557e-06	21984
Full_SurfArea	rs853966	T	G	658.07	134.554	1.004e-06	21984
Full_SurfArea	rs1022573	A	C	-625.597	131.597	1.995e-06	21624
Full_SurfArea	rs853977	T	C	625.666	131.75	2.045e-06	21624
Full_SurfArea	rs853969	A	G	630.475	131.914	1.758e-06	21624
Full_SurfArea	rs853970	A	G	632.173	131.886	1.64e-06	21624
Full_SurfArea	rs2793051	T	C	-620.686	135.917	4.956e-06	21238
Full_SurfArea	rs853971	T	C	627.082	132.065	2.052e-06	21624
Full_SurfArea	rs1101556	T	G	631.503	132.094	1.747e-06	21624
Full_SurfArea	rs1101557	T	C	627.48	132.132	2.045e-06	21624
Full_SurfArea	rs853973	A	G	631.602	132.104	1.743e-06	21624
Full_SurfArea	rs853974	T	C	1133.52	151.012	6.088e-14	21624
Full_SurfArea	rs853975	T	C	-651.956	132.479	8.602e-07	21624
Full_SurfArea	rs853968	T	C	-627.055	132.202	2.104e-06	21624
Full_SurfArea	rs861237	T	C	-636.595	132.455	1.539e-06	21624
Full_SurfArea	rs1262545	T	C	-628.077	132.281	2.054e-06	21624
Full_SurfArea	rs1262546	T	C	628.881	132.312	2.004e-06	21624
Full_SurfArea	rs979197	T	C	-632.209	132.277	1.758e-06	21624
Full_SurfArea	rs1262550	A	C	624.326	133.272	2.805e-06	21624
Full_SurfArea	rs1262551	T	C	-631.694	132.341	1.813e-06	21624
Full_SurfArea	rs1262552	T	C	-633.31	132.453	1.741e-06	21624
Full_SurfArea	rs1262553	T	C	628.795	132.408	2.045e-06	21624
Full_SurfArea	rs1015446	A	G	-619.268	132.687	3.054e-06	21624
Full_SurfArea	rs12525327	A	G	748.434	160.052	2.923e-06	21624
Full_SurfArea	6:127115246:A_ACC	I	R	-1217.91	202.131	1.687e-09	18569
Full_SurfArea	rs35848181	A	G	-763.437	159.994	1.827e-06	21624
Full_SurfArea	rs12198009	T	G	1202.87	235.846	3.392e-07	20776
Full_SurfArea	rs12199006	A	G	1104	232.665	2.085e-06	21162
Full_SurfArea	rs9375477	A	G	-1046.57	185.225	1.602e-08	21162
Full_SurfArea	rs17364645	A	G	-644.433	140.816	4.73e-06	22253
Full_SurfArea	rs17364659	A	C	-648.137	141.007	4.296e-06	22253
Full_SurfArea	rs10281422	A	G	634.503	137.592	3.998e-06	22253
Full_SurfArea	rs41563	A	G	639.196	137.663	3.431e-06	22253
Full_SurfArea	rs4730073	A	C	-661.391	137.877	1.611e-06	22253
Full_SurfArea	rs4266584	A	C	652.757	142.611	4.713e-06	22253
Full_SurfArea	rs2385559	T	G	-662.247	144.486	4.573e-06	22253
Full_SurfArea	rs6460007	A	G	843.104	182.484	3.835e-06	22253
Full_SurfArea	rs10251751	T	C	634.1	136.999	3.683e-06	22253
Full_SurfArea	9:3321000_CA_C	d	R	-1019.33	219.404	3.386e-06	19660
Full_SurfArea	rs7100317	A	C	-686.511	146.474	2.773e-06	20487
Full_SurfArea	rs12766229	C	G	713.996	147.051	1.201e-06	22253
Full_SurfArea	rs11012721	A	G	704.006	142.769	8.178e-07	21630
Full_SurfArea	rs11012722	A	G	706.807	146.643	1.436e-06	22253
Full_SurfArea	rs66934412	A	T	709.444	146.271	1.233e-06	22253
Full_SurfArea	rs12770228	A	G	-655.973	137.241	1.755e-06	22253
Full_SurfArea	rs35106872	A	G	621.609	135.409	4.42e-06	22253
Full_SurfArea	rs12357321	A	G	-696.925	141.874	9.003e-07	22253
Full_SurfArea	rs11012726	T	C	720.073	143.612	5.33e-07	22253
Full_SurfArea	rs138844120	I	R	-735.624	147.578	6.207e-07	21867
Full_SurfArea	rs946711	A	C	697.685	139.579	5.778e-07	22253
Full_SurfArea	rs12246842	A	G	660.931	136.825	1.362e-06	22061
Full_SurfArea	rs7922812	A	G	663.079	135.108	9.212e-07	21630
Full_SurfArea	rs9971342	T	C	654.681	134.585	1.148e-06	21630
Full_SurfArea	rs7082934	T	G	732.898	139.01	1.347e-07	21822
Full_SurfArea	rs11012749	A	C	607.606	131.994	4.158e-06	22061
Full_SurfArea	rs1243186	A	G	635.637	133.477	1.915e-06	21630
Full_SurfArea	rs1243181	T	C	603.982	131.571	4.421e-06	22061
Full_SurfArea	rs1243190	A	G	622.207	131.958	2.415e-06	21630
Full_SurfArea	rs1243199	A	G	712.671	131.83	6.445e-08	21630
Full_SurfArea	rs1243197	T	C	708.376	131.661	7.436e-08	21630
Full_SurfArea	rs1243196	A	T	732.319	151.644	1.371e-06	21867
Full_SurfArea	rs1243193	T	G	662.801	144.495	4.496e-06	22253
Full_SurfArea	rs1261777	T	C	658.401	135.198	1.117e-06	21630
Full_SurfArea	rs7477335	A	C	733.872	134.15	4.487e-08	21630
Full_SurfArea	rs4747437	T	G	691.524	139.408	7.034e-07	21630
Full_SurfArea	rs9419939	A	G	814.897	167.898	1.213e-06	22253
Full_SurfArea	rs2432580	T	C	869.438	167.502	2.096e-07	22253
Full_SurfArea	rs284859	T	G	860.019	166.709	2.485e-07	22253
Full_SurfArea	rs6892	A	G	-858.708	166.895	2.672e-07	22253
Full_SurfArea	rs284849	T	G	1034.93	163.333	2.353e-10	22253
Full_SurfArea	rs284848	A	G	1034.37	163.244	2.353e-10	22253
Full_SurfArea	rs2486758	T	C	-873.579	157.873	3.14e-08	22253
Full_SurfArea	rs9420881	T	C	878.635	160.668	4.535e-08	22253
Full_SurfArea	rs1163564	T	C	-1007.04	173.22	6.114e-09	21867
Full_SurfArea	rs3096383	A	G	993.077	162.76	1.051e-09	22253
Full_SurfArea	rs6584535	T	C	813.485	157.336	2.336e-07	22253
Full_SurfArea	10:104739553_TA_T	d	R	-992.31	170.1	5.421e-09	20355
Full_SurfArea	rs7908450	C	G	-971.783	162.185	2.075e-09	22253
Full_SurfArea	rs2184996	A	G	967.79	162.007	2.319e-09	22253
Full_SurfArea	rs56036640	T	C	-939.361	161.234	5.675e-09	22253
Full_SurfArea	rs1163246	A	G	972.218	161.002	1.555e-09	22253
Full_SurfArea	rs1163248	A	G	838.111	155.962	7.708e-08	22253
Full_SurfArea	rs1163249	A	G	980.848	160.982	1.109e-09	22253
Full_SurfArea	rs1141095	C	G	817.448	175.581	3.229e-06	22253
Full_SurfArea	rs1750480	T	G	733.457	141.713	2.271e-07	22253
Full_SurfArea	rs1773924	T	C	756.433	141.598	9.186e-08	22253
Full_SurfArea	rs1163233	T	C	-643.376	138.106	3.184e-06	22253
Full_SurfArea	rs1773926	C	G	628.394	137.604	4.955e-06	22253
Full_SurfArea	rs1630303	T	G	637.63	137.613	3.595e-06	22253
Full_SurfArea	rs11191612	A	G	648.237	137.838	2.565e-06	22253
Full_SurfArea	rs10883848	A	G	844.446	143.651	4.141e-09	22253
Full_SurfArea	rs11191615	A	T	-648.157	139.769	3.529e-06	22253
Full_SurfArea	rs7082288	T	C	727.564	132.271	3.786e-08	22253
Full_SurfArea	rs6584542	A	G	829.996	142.756	6.097e-09	21867
Full_SurfArea	rs4917384	T	C	852.234	139.101	8.969e-10	22253
Full_SurfArea	rs10748841	A	G	-832.849	144.39	8.019e-09	21867
Full_SurfArea	rs6584543	A	G	-717.485	129.464	2.991e-08	22253
Full_SurfArea	rs7916056	T	C	739.4	129.919	1.261e-08	22253
Full_SurfArea	rs6584545	A	T	970.36	157.188	6.69e-10	22253
Full_SurfArea	rs147350748	I	R	-685.617	146.005	2.655e-06	20355
Full_SurfArea	rs7894240	T	C	753.1	129.585	6.186e-09	22253
Full_SurfArea	rs6584546	C	G	721.654	129.161	2.307e-08	22253
Full_SurfArea	rs7913461	A	G	-740.831	129.676	1.11e-08	22253
Full_SurfArea	rs1891292	A	G	718.83	129.117	2.588e-08	22253
Full_SurfArea	rs1891293	A	G	-718.739	129.123	2.602e-08	22253
Full_SurfArea	rs4917385	T	G	833.994	137.547	1.333e-09	22253
Full_SurfArea	rs7903004	A	G	-751.424	129.612	6.731e-09	22253
Full_SurfArea	rs2506961	T	G	-723.559	129.17	2.124e-08	22253
Full_SurfArea	rs1712510	A	G	734.937	129.474	1.376e-08	22253
Full_SurfArea	rs1628768	T	C	-987.417	156.835	3.056e-10	22253
Full_SurfArea	rs1712509	T	G	837.193	137.339	1.089e-09	22253
Full_SurfArea	rs1163082	T	C	-714.993	129.295	3.203e-08	22253
Full_SurfArea	rs1163076	A	C	-746.658	129.627	8.41e-09	22253
Full_SurfArea	rs1163075	A	G	751.183	129.652	6.88e-09	22253
Full_SurfArea	rs1163074	T	C	748.697	129.621	7.648e-09	22253
Full_SurfArea	rs1163073	T	C	-835.304	137.341	1.187e-09	22253
Full_SurfArea	rs1163072	T	C	-612.993	133.765	4.592e-06	22253
Full_SurfArea	rs1163077	T	C	-717.943	130.137	3.452e-08	22253
Full_SurfArea	rs111971984	I	R	735.917	142.131	2.246e-07	18148
Full_SurfArea	rs1163081	C	G	745.615	129.787	9.198e-09	22253
Full_SurfArea	rs1712517	T	C	694.108	128.327	6.342e-08	22253
Full_SurfArea	rs1712516	A	G	732.6	130.054	1.771e-08	22253
Full_SurfArea	rs3123794	A	G	-689.791	128.493	7.948e-08	22253
Full_SurfArea	rs3123795	T	C	-708.767	129.593	4.522e-08	22253
Full_SurfArea	rs1163083	A	T	700.926	129.858	6.753e-08	22253
Full_SurfArea	rs1163084	T	C	-687.933	128.624	8.873e-08	22253
Full_SurfArea	rs1163086	A	G	-719.993	130.231	3.228e-08	22253
Full_SurfArea	rs1163087	A	G	718.276	130.274	3.516e-08	22253
Full_SurfArea	rs1163089	A	G	718.684	130.289	3.467e-08	22253
Full_SurfArea	rs4918003	T	C	702.703	129.802	6.175e-08	22253
Full_SurfArea	rs2487862	T	C	981.179	171.322	1.022e-08	22253
Full_SurfArea	rs7076274	A	G	817.417	137.764	2.966e-09	22253
Full_SurfArea	rs7094198	T	C	-698.499	135.106	2.341e-07	21867
Full_SurfArea	rs3740381	C	G	815.659	137.779	3.218e-09	22253
Full_SurfArea	rs4293062	A	G	699.306	130.374	8.147e-08	22253
Full_SurfArea	rs11191641	T	C	697.801	130.311	8.56e-08	22253
Full_SurfArea	rs4293063	T	G	700.299	130.468	7.979e-08	22253
Full_SurfArea	rs7917388	T	C	817.296	137.79	3.002e-09	22253
Full_SurfArea	rs11191642	A	G	-816.553	137.804	3.114e-09	22253
Full_SurfArea	rs2030205	C	G	982.805	158.451	5.554e-10	22253
Full_SurfArea	rs147071364	I	R	996.441	164.399	1.352e-09	20355
Full_SurfArea	rs2008530	A	G	702.561	130.11	6.673e-08	22253
Full_SurfArea	rs11191645	T	G	694.496	130.055	9.295e-08	22253
Full_SurfArea	10:105059494_CCAA_C	d	R	728.945	139.395	1.701e-07	20355
Full_SurfArea	rs10883853	T	C	691.596	129.554	9.383e-08	22253
Full_SurfArea	rs41287490	T	C	-1201.31	197.778	1.247e-09	22253
Full_SurfArea	rs112940311	T	C	-684.99	129.524	1.233e-07	22253
Full_SurfArea	10:105064973_AC_A	d	R	836.603	150.956	2.99e-08	18148
Full_SurfArea	rs6584547	T	C	688.773	128.625	8.561e-08	22253
Full_SurfArea	rs11191649	T	C	-680.122	128.996	1.346e-07	22253
Full_SurfArea	rs61350103	A	C	-685.277	129.395	1.184e-07	22253
Full_SurfArea	rs61869825	T	C	806.891	137.903	4.882e-09	22253
Full_SurfArea	rs12220267	T	C	800.103	137.715	6.253e-09	22253
Full_SurfArea	rs11191654	A	C	683.688	129.704	1.356e-07	22253
Full_SurfArea	rs12268583	T	C	686.593	129.389	1.118e-07	22253
Full_SurfArea	rs61869827	T	C	-686.121	129.553	1.183e-07	22253
Full_SurfArea	rs61869829	T	C	667.821	129.946	2.759e-07	22253
Full_SurfArea	rs4420190	T	C	-954.138	158.438	1.721e-09	22253
Full_SurfArea	rs72846192	A	C	-966.787	159.105	1.229e-09	22253
Full_SurfArea	rs61869832	T	C	-651.581	131.52	7.262e-07	22253
Full_SurfArea	rs11191657	T	C	-654.777	130.782	5.539e-07	22253
Full_SurfArea	rs11191658	A	G	-806.892	137.758	4.704e-09	22253
Full_SurfArea	rs72846198	A	G	808.505	137.816	4.45e-09	22253
Full_SurfArea	rs11191660	A	G	809.689	137.919	4.338e-09	22253
Full_SurfArea	rs12258092	T	C	691.566	129.233	8.732e-08	22253
Full_SurfArea	rs60388741	T	G	711.562	130.304	4.74e-08	22253
Full_SurfArea	rs4918007	A	G	-693.266	128.995	7.685e-08	22253
Full_SurfArea	rs4917387	T	C	-676.93	129.507	1.723e-07	22253
Full_SurfArea	rs7921655	T	C	670.508	129.478	2.236e-07	22253
Full_SurfArea	rs7074749	T	C	672.187	129.306	2.01e-07	22253
Full_SurfArea	rs11191663	T	C	669.409	129.193	2.202e-07	22253
Full_SurfArea	rs11191664	T	C	667.54	129.148	2.356e-07	22253
Full_SurfArea	rs113447331	T	C	-677.2	135.414	5.704e-07	21867
Full_SurfArea	rs4311992	A	G	964.755	160.002	1.643e-09	22253
Full_SurfArea	rs7900966	T	C	-662.176	129.107	2.914e-07	22253
Full_SurfArea	rs113528138	A	C	806.159	137.355	4.38e-09	22253
Full_SurfArea	rs11191666	A	G	-661.962	128.973	2.858e-07	22253
Full_SurfArea	rs10883857	T	G	662.453	128.978	2.804e-07	22253
Full_SurfArea	rs10883858	A	G	665.993	129.047	2.458e-07	22253
Full_SurfArea	rs11191667	A	G	808.345	137.36	3.984e-09	22253
Full_SurfArea	rs4918012	A	G	-684.309	130.932	1.728e-07	22253
Full_SurfArea	rs61869857	A	G	-659.188	130.496	4.385e-07	22253
Full_SurfArea	rs7905968	T	C	669.489	128.595	1.928e-07	22253
Full_SurfArea	rs7894768	T	C	-692.149	129.608	9.278e-08	22253
Full_SurfArea	rs11191672	T	C	666.532	129.109	2.436e-07	22253
Full_SurfArea	rs2176448	A	T	-614.577	134.305	4.74e-06	22253
Full_SurfArea	10:105143357:CAG_C	d	R	891.374	149.653	2.58e-09	19660
Full_SurfArea	rs61871160	T	C	670.208	129.198	2.132e-07	22253
Full_SurfArea	rs61871162	A	G	-666.634	129.415	2.589e-07	22253
Full_SurfArea	rs12414443	A	G	-670.308	129.222	2.134e-07	22253
Full_SurfArea	rs59744322	T	G	666.405	129.179	2.486e-07	22253
Full_SurfArea	rs7093039	A	G	-666.964	128.907	2.292e-07	22253
Full_SurfArea	rs3215263	I	R	645.647	130.725	7.853e-07	21867
Full_SurfArea	rs7911488	A	G	-811.664	137.509	3.578e-09	22253
Full_SurfArea	rs11191676	A	C	672.72	129.369	1.993e-07	22253
Full_SurfArea	rs2292807	T	C	-669.601	129.235	2.204e-07	22253
Full_SurfArea	rs7076463	T	C	809.714	137.67	4.064e-09	22253
Full_SurfArea	rs10883863	A	G	-665.537	129.215	2.596e-07	22253
Full_SurfArea	rs12414609	A	G	-685.899	133.801	2.955e-07	20821
Full_SurfArea	rs12413386	T	C	-682.269	131.416	2.084e-07	22253
Full_SurfArea	rs10883865	C	G	-619.103	133.816	3.718e-06	22253
Full_SurfArea	rs57480812	I	R	-690.834	150.216	4.247e-06	19660
Full_SurfArea	rs11191683	T	G	812.338	138.136	4.085e-09	22253
Full_SurfArea	rs2271751	T	C	-798.795	137.992	7.093e-09	22253
Full_SurfArea	rs7089271	A	G	-642.198	129.974	7.773e-07	22253
Full_SurfArea	rs35435808	T	C	614.673	134.46	4.845e-06	22253
Full_SurfArea	rs61871170	T	C	-612.969	131.497	3.139e-06	22253
Full_SurfArea	rs11191686	A	G	615.052	133.309	3.955e-06	22253
Full_SurfArea	rs2863730	T	G	-615.797	133.975	4.299e-06	21867
Full_SurfArea	rs2281860	T	C	608.392	131.221	3.546e-06	22253
Full_SurfArea	rs942900	T	C	-652.858	132.842	8.899e-07	22253
Full_SurfArea	rs7831	A	C	-608.119	132.455	4.408e-06	22253
Full_SurfArea	rs6580	T	C	-601.096	131.425	4.792e-06	22253
Full_SurfArea	rs729211	T	C	659.337	139.68	2.355e-06	22253
Full_SurfArea	rs10883870	A	G	-620.48	135.615	4.756e-06	22253
Full_SurfArea	rs4918016	T	C	-695.198	140.72	7.801e-07	22253
Full_SurfArea	rs7096861	A	C	-667.263	140.573	2.067e-06	22253
Full_SurfArea	rs12252456	C	G	-684.959	135.823	4.582e-07	22253
Full_SurfArea	rs2986022	A	G	623.58	130.341	1.716e-06	22253
Full_SurfArea	rs2863732	A	G	-648.129	140.999	4.292e-06	22253
Full_SurfArea	rs3014192	T	C	611.96	129.487	2.289e-06	22253
Full_SurfArea	rs11191709	A	G	-742.273	153.665	1.362e-06	22253
Full_SurfArea	rs199951133	I	R	1441.88	305.561	2.372e-06	21867
Full_SurfArea	rs73392995	A	C	-1398.85	294.193	1.986e-06	22253
Full_SurfArea	rs16910305	T	C	-1366.19	297.568	4.407e-06	22253
Full_SurfArea	rs325700	T	C	2136.31	431.783	7.511e-07	19505
Full_SurfArea	rs11601251	A	G	999.641	208.222	1.58e-06	19660
Full_SurfArea	rs3825015	T	C	-803.792	172.735	3.266e-06	19726
Full_SurfArea	rs12365548	A	G	-814.139	168.685	1.39e-06	19726
Full_SurfArea	rs12365873	T	C	-808.564	168.507	1.599e-06	19726
Full_SurfArea	rs12365878	T	C	-803.446	168.427	1.839e-06	19726
Full_SurfArea	rs7936466	T	G	800.239	169.008	2.192e-06	19726
Full_SurfArea	rs12790925	A	G	811.262	168.137	1.4e-06	19726
Full_SurfArea	rs11231886	T	G	-804.223	168.55	1.829e-06	19726
Full_SurfArea	rs4930277	T	C	-810.197	168.018	1.421e-06	19726
Full_SurfArea	rs7933683	T	C	-807.897	167.595	1.432e-06	19726
Full_SurfArea	rs58790228	T	C	-794.884	167.326	2.029e-06	19726
Full_SurfArea	rs12798965	A	C	-826.379	169.723	1.122e-06	19726
Full_SurfArea	rs4930682	C	G	-793.789	166.248	1.799e-06	19726
Full_SurfArea	rs71541906	A	G	998.753	204.425	1.031e-06	18719
Full_SurfArea	rs11231889	A	G	-782.107	167.74	3.122e-06	19726
Full_SurfArea	rs35654492	A	G	-802.055	169.411	2.197e-06	19726
Full_SurfArea	rs11231890	T	C	815.12	172.835	2.403e-06	19726
Full_SurfArea	rs35938015	T	C	-776.21	165.68	2.8e-06	19726
Full_SurfArea	rs4930683	T	C	-786.418	164.88	1.846e-06	19726
Full_SurfArea	rs7942905	C	G	-808.023	167.425	1.392e-06	19726
Full_SurfArea	rs916606	T	C	-764.661	164.718	3.446e-06	19726
Full_SurfArea	rs784567	A	G	-636.173	134.032	2.07e-06	21396
Full_SurfArea	rs7975351	A	G	719.715	136.9	1.462e-07	21396
Full_SurfArea	rs11170594	A	T	891.64	177.621	5.17e-07	21010
Full_SurfArea	rs10783585	T	G	-602.568	131.378	4.507e-06	21396
Full_SurfArea	rs4019971	A	G	-604.559	131.318	4.149e-06	21396
Full_SurfArea	rs4759245	T	C	614.127	132.074	3.321e-06	21396
Full_SurfArea	rs10783586	T	C	616.715	131.232	2.609e-06	21396
Full_SurfArea	rs7312372	T	C	-636.913	133.266	1.759e-06	21396
Full_SurfArea	rs10747675	A	G	623.062	130.753	1.887e-06	21396
Full_SurfArea	rs6580953	T	C	-604.267	131.545	4.356e-06	21396
Full_SurfArea	rs2177000	T	C	603.195	131.546	4.531e-06	21396
Full_SurfArea	rs7976398	T	C	-614.288	132.051	3.289e-06	21396
Full_SurfArea	rs7300936	T	C	615.079	131.81	3.065e-06	21396
Full_SurfArea	rs12817180	A	G	-643.82	132.804	1.248e-06	21396
Full_SurfArea	rs10783592	A	G	644.387	132.824	1.226e-06	21396
Full_SurfArea	rs2365342	T	C	-637.889	133.01	1.62e-06	21396
Full_SurfArea	rs2365343	T	C	-634.079	132.967	1.854e-06	21396
Full_SurfArea	rs8181632	A	G	-680.897	135.024	4.588e-07	21396
Full_SurfArea	rs7485472	T	C	-607.541	132.855	4.809e-06	21396
Full_SurfArea	rs4759279	T	C	604.717	132.365	4.911e-06	21396
Full_SurfArea	rs17661390	A	G	-757.197	162.284	3.073e-06	21396
Full_SurfArea	rs7968937	A	G	-633.043	134.808	2.655e-06	21396
Full_SurfArea	rs7963544	A	G	621.577	134.987	4.13e-06	21396
Full_SurfArea	rs4763022	T	G	-619.929	134.961	4.361e-06	21396
Full_SurfArea	rs10877850	A	G	-622.846	134.968	3.935e-06	21396
Full_SurfArea	rs7954432	A	G	-617.223	134.916	4.765e-06	21396
Full_SurfArea	rs10735910	A	G	671.514	137.409	1.024e-06	21396
Full_SurfArea	rs10747968	T	G	-680.371	137.594	7.624e-07	21396
Full_SurfArea	12:63004643:G_GGT	I	R	731.747	147.714	7.278e-07	18803
Full_SurfArea	rs60652359	I	R	689.138	138.859	6.947e-07	21010
Full_SurfArea	rs10877890	A	G	652.896	137.115	1.92e-06	21396
Full_SurfArea	rs925461	T	C	670.238	137.273	1.047e-06	21396
Full_SurfArea	rs10877892	A	G	835.922	170.28	9.15e-07	21396
Full_SurfArea	rs2359381	T	C	-669.437	137.273	1.079e-06	21396
Full_SurfArea	rs2133303	C	G	652.372	139.058	2.714e-06	21396
Full_SurfArea	rs10877893	A	G	648.021	139.538	3.416e-06	21396
Full_SurfArea	rs10160870	A	G	653.862	137.251	1.898e-06	21396
Full_SurfArea	rs907486	C	G	-653.674	137.25	1.911e-06	21396
Full_SurfArea	rs907487	T	C	652.347	137.289	2.018e-06	21396
Full_SurfArea	rs10784312	A	G	-648.897	137.297	2.287e-06	21396
Full_SurfArea	rs61921573	A	G	-755.546	165.062	4.709e-06	19508
Full_SurfArea	rs12298541	A	C	931.15	144.648	1.216e-10	22253
Full_SurfArea	rs35524197	A	G	-893.022	166.807	8.621e-08	22253
Full_SurfArea	rs35246909	I	R	-957.78	159.104	1.746e-09	21867
Full_SurfArea	rs7487625	A	C	941.323	157.443	2.248e-09	22253
Full_SurfArea	rs10878346	A	G	-937.112	156.868	2.317e-09	22253
Full_SurfArea	rs12424216	A	G	889.478	163.06	4.9e-08	22253
Full_SurfArea	rs12426889	A	G	-888.86	163.066	5.011e-08	22253
Full_SurfArea	rs11175967	C	G	940.401	156.8	2.004e-09	22253
Full_SurfArea	rs10878347	T	C	940.46	156.793	1.996e-09	22253
Full_SurfArea	rs71450835	A	G	-814.486	169.828	1.619e-06	21791
Full_SurfArea	12:66321741:ATATA	d	R	-895.262	194.467	4.151e-06	18969
Full_SurfArea	rs1460123	A	C	-944.704	156.572	1.603e-09	22253
Full_SurfArea	rs12812630	A	G	-878.787	162.827	6.774e-08	22253
Full_SurfArea	rs343086	T	C	-867.69	145.503	2.471e-09	22253
Full_SurfArea	rs1480474	A	G	970.087	131.431	1.572e-13	22253
Full_SurfArea	rs10878349	A	G	1016.24	130.285	6.182e-15	22253
Full_SurfArea	rs12811995	T	C	887.77	162.629	4.792e-08	22253
Full_SurfArea	rs12810758	T	C	-943.693	156.412	1.606e-09	22253
Full_SurfArea	rs7966340	C	G	-940.341	156.446	1.848e-09	22253
Full_SurfArea	rs35083527	T	C	-870.571	162.504	8.451e-08	22253
Full_SurfArea	rs17101923	T	G	-933.156	156.463	2.46e-09	22253
Full_SurfArea	rs56891231	I	R	-958.195	157.85	1.277e-09	21867
Full_SurfArea	rs35084099	A	C	931.829	156.235	2.457e-09	22253
Full_SurfArea	rs10784502	T	C	-974.259	128.96	4.198e-14	22253
Full_SurfArea	rs1979440	T	C	888.123	131.745	1.571e-11	22253
Full_SurfArea	rs7959830	T	G	-934.524	130.974	9.664e-13	22253
Full_SurfArea	rs1871674	A	T	-862.753	162.69	1.139e-07	22253
Full_SurfArea	rs17179670	A	G	858.046	162.82	1.365e-07	22253
Full_SurfArea	rs1351394	T	C	969.239	129.138	6.122e-14	22253
Full_SurfArea	rs7138102	A	G	-849.383	132.614	1.504e-10	22253
Full_SurfArea	rs867633	A	G	-867.779	132.494	5.769e-11	22253
Full_SurfArea	rs1042725	T	C	-934.715	128.918	4.154e-13	22253
Full_SurfArea	rs8756	A	C	-924.17	128.385	6.092e-13	22253
Full_SurfArea	rs7970350	T	C	-926.434	128.691	6.071e-13	22253
Full_SurfArea	rs7968902	T	G	956.091	133.674	8.528e-13	22253
Full_SurfArea	rs12422370	C	G	849.032	161.614	1.493e-07	22253
Full_SurfArea	rs12424086	T	C	838.31	161.599	2.13e-07	22253
Full_SurfArea	rs61921611	T	C	751.588	140.321	8.499e-08	22253
Full_SurfArea	rs12422566	C	G	-844.14	162.753	2.141e-07	22253
Full_SurfArea	rs58464950	T	C	-851.415	162.731	1.676e-07	22253
Full_SurfArea	rs61293802	A	T	-850.572	163.693	2.035e-07	22253
Full_SurfArea	rs7968682	T	G	-926.811	129.635	8.715e-13	22253
Full_SurfArea	rs113744258	T	G	942.646	161.378	5.182e-09	21867
Full_SurfArea	rs4338565	T	C	-929.908	135.936	7.875e-12	21867
Full_SurfArea	rs151174669	T	C	-892.328	168.302	1.146e-07	21867
Full_SurfArea	rs7312464	A	G	1120.01	151.041	1.214e-13	21867
Full_SurfArea	rs9669278	T	C	950.615	132.068	6.113e-13	22253
Full_SurfArea	rs7306710	T	C	952.937	132.703	6.922e-13	22253
Full_SurfArea	rs67713763	A	T	-888.851	165.966	8.527e-08	22253
Full_SurfArea	rs1585897	A	C	-779.476	132.534	4.07e-09	22253
Full_SurfArea	rs10748028	A	C	-732.833	136.746	8.365e-08	22253
Full_SurfArea	rs10400419	T	C	734.192	132.926	3.327e-08	22253
Full_SurfArea	rs11175992	A	T	-970.963	180.125	7.026e-08	20841
Full_SurfArea	rs17797222	A	G	844.876	171.217	8.034e-07	21822
Full_SurfArea	rs11111293	T	C	929.878	178.685	1.95e-07	18805
Full_SurfArea	rs2195243	C	G	-943.36	177.194	1.016e-07	19785
Full_SurfArea	rs116215155	T	C	4270.04	928.43	4.241e-06	11487
Full_SurfArea	13:40836237:A_ATA	I	R	-880.255	181.767	1.28e-06	18309
Full_SurfArea	rs9933611	A	G	3004.51	644.848	3.174e-06	14786
Full_SurfArea	rs78158162	T	C	2192.39	461.995	2.08e-06	22253
Full_SurfArea	rs62064594	A	G	-1423.04	261.027	4.989e-08	14936
Full_SurfArea	rs62064595	A	G	1394.37	260.586	8.751e-08	14936
Full_SurfArea	rs79724577	A	C	1748.01	201.478	4.102e-18	19877
Full_SurfArea	rs4763	A	G	-1796.65	201.807	5.445e-19	19877
Full_SurfArea	rs62064597	C	G	1802.39	200.897	2.919e-19	19877
Full_SurfArea	rs62064598	C	G	1783.39	194.703	5.211e-20	20632
Full_SurfArea	rs2028078	A	G	-1783.06	194.667	5.212e-20	20632
Full_SurfArea	rs56220387	A	G	1774.89	194.643	7.601e-20	20632
Full_SurfArea	rs55793500	T	C	1775.17	194.213	6.224e-20	20632
Full_SurfArea	rs62064600	A	G	-1777.14	194.217	5.678e-20	20632
Full_SurfArea	rs56236914	T	C	-1781.27	193.75	3.798e-20	20632
Full_SurfArea	rs62064603	T	C	-1765.92	193.473	7.012e-20	20632
Full_SurfArea	rs73984391	T	G	-1723.15	193.022	4.367e-19	20632
Full_SurfArea	17:43484876:C_CT	I	R	-1843.97	216.051	1.403e-17	18039
Full_SurfArea	rs1808189	T	C	1784.36	209.097	1.418e-17	19491
Full_SurfArea	rs62064637	T	G	1775.64	193.353	4.177e-20	20632
Full_SurfArea	rs36078910	A	G	-1756.96	192.819	8.092e-20	20632
Full_SurfArea	rs35389313	T	C	1760.22	192.7	6.571e-20	20632
Full_SurfArea	rs35327136	A	C	-1698.19	192.443	1.101e-18	20632
Full_SurfArea	rs8071011	T	C	-1755.72	192.377	7.078e-20	20632
Full_SurfArea	rs62064641	T	C	1755.24	192.273	6.921e-20	20632
Full_SurfArea	rs62064643	A	G	-1757.15	192.071	5.775e-20	20632
Full_SurfArea	rs34063617	A	G	-1762.18	191.554	3.601e-20	20632
Full_SurfArea	rs12940792	T	C	-1762.85	191.203	2.977e-20	20632
Full_SurfArea	rs12947718	A	G	-1758.93	191.04	3.349e-20	20632
Full_SurfArea	rs71373560	T	C	-1785.4	194.187	3.776e-20	20632
Full_SurfArea	rs34915103	C	G	1765.71	190.653	2.018e-20	20740
Full_SurfArea	17:43493834:T_TC	I	R	-1795.54	252.876	1.243e-12	13570
Full_SurfArea	rs12942951	T	C	1761.25	200.561	1.611e-18	19877
Full_SurfArea	rs35884427	A	G	-1765.55	190.417	1.827e-20	20740
Full_SurfArea	rs12952504	C	G	1802.27	194.432	1.872e-20	20121
Full_SurfArea	rs12936645	A	T	1533.31	235.082	6.917e-11	14994
Full_SurfArea	rs34286926	A	G	1736.16	187.726	2.279e-20	20740
Full_SurfArea	rs56378631	T	C	1741.09	186.808	1.161e-20	20740
Full_SurfArea	rs12946723	T	C	-1741.35	188.223	2.213e-20	20740
Full_SurfArea	rs12952764	A	G	-1738.54	186.199	9.909e-21	20740
Full_SurfArea	rs35420583	T	C	-1823.45	207.126	1.326e-18	19877
Full_SurfArea	rs34792542	A	G	1823.12	207.071	1.317e-18	19877
Full_SurfArea	rs35519908	T	C	1702.07	185.794	5.139e-20	20740
Full_SurfArea	rs12942666	A	G	1703.68	185.185	3.584e-20	20740
Full_SurfArea	rs62064645	A	G	-1691.68	185.111	6.32e-20	20740
Full_SurfArea	rs62064646	A	G	-1661.96	184.426	2.032e-19	20740
Full_SurfArea	rs62064647	A	G	-1700.7	184.592	3.164e-20	20740
Full_SurfArea	rs7222389	T	C	1699.06	184.423	3.177e-20	20740
Full_SurfArea	rs55648326	T	C	1657.62	184.127	2.204e-19	20740
Full_SurfArea	rs56212100	A	G	-1699.07	184.361	3.084e-20	20740
Full_SurfArea	17:43502012	T	C	1779.22	192.267	2.165e-20	19929
Full_SurfArea	rs62064649	A	G	1697.99	184.4	3.317e-20	20740
Full_SurfArea	rs35626715	T	C	1703.56	184.87	3.116e-20	20740
Full_SurfArea	rs62064651	A	G	-1722.99	185.961	1.945e-20	20507
Full_SurfArea	rs76344126	A	G	-1690.53	184.377	4.779e-20	20740
Full_SurfArea	rs7209501	A	C	1688.71	184.051	4.505e-20	20740
Full_SurfArea	rs199883901	I	R	-1687.24	245.522	6.329e-12	14994
Full_SurfArea	rs12949256	T	C	-1685.14	188.051	3.215e-19	20740
Full_SurfArea	rs7220206	A	G	-1651.97	183.539	2.245e-19	20740
Full_SurfArea	rs7222444	A	G	1724.41	185.265	1.305e-20	20740
Full_SurfArea	rs12939187	T	G	-1676.52	183.147	5.489e-20	20740
Full_SurfArea	rs34018943	A	G	1677.44	183.099	5.122e-20	20740
Full_SurfArea	rs34104358	T	G	-1675.86	183.069	5.473e-20	20740
Full_SurfArea	rs62064652	A	G	1733.85	190.528	9.015e-20	20740
Full_SurfArea	rs62064653	T	C	-1698.54	185.881	6.377e-20	20740
Full_SurfArea	rs56020833	T	C	-1687.42	183.357	3.483e-20	20740
Full_SurfArea	rs55642947	C	G	-1717.03	181.963	3.869e-21	21100
Full_SurfArea	rs34465449	A	C	-1683.98	182.833	3.246e-20	20740
Full_SurfArea	rs12946900	A	G	1704.59	181.309	5.374e-21	21100
Full_SurfArea	rs56168933	A	G	-1731.6	184.102	5.17e-21	20740
Full_SurfArea	rs55790407	C	G	-1703.29	181.251	5.593e-21	21100
Full_SurfArea	rs11012	T	C	-1709.62	181.167	3.847e-21	21100
Full_SurfArea	rs9730	C	G	1703.27	181.239	5.563e-21	21100
Full_SurfArea	rs62064654	T	C	-1715.21	181.853	4.029e-21	21100
Full_SurfArea	rs62064655	A	G	-1709.77	181.666	4.887e-21	21100
Full_SurfArea	rs34363898	T	C	-1712.73	183.665	1.107e-20	20714
Full_SurfArea	rs36114997	A	G	1710.23	181.745	4.958e-21	21100
Full_SurfArea	rs35354512	T	C	-1712.05	181.984	5.071e-21	21100
Full_SurfArea	rs17631303	A	G	1733.03	182.469	2.147e-21	21100
Full_SurfArea	rs35591873	A	G	-1733.05	186.021	1.203e-20	20714
Full_SurfArea	rs62064657	A	G	-1732.04	182.685	2.519e-21	21100
Full_SurfArea	rs35489312	T	C	1720.79	182.436	4.014e-21	21100
Full_SurfArea	rs34887474	A	C	-1729.29	184.824	8.246e-21	20714
Full_SurfArea	rs62065374	A	G	-1738.05	183.38	2.595e-21	21100
Full_SurfArea	rs62065376	C	G	1747.7	183.414	1.592e-21	21100
Full_SurfArea	rs62065377	A	G	1760.68	193.62	9.593e-20	20740
Full_SurfArea	rs62065378	T	C	1740.02	184.13	3.389e-21	21100
Full_SurfArea	17:43522775_TTGTG_T	d	R	-1807.27	192.452	5.957e-21	20714
Full_SurfArea	rs149182889	I	R	-1740.95	185.748	7.072e-21	20714
Full_SurfArea	rs113575082	T	C	-1760.25	184.186	1.213e-21	21100
Full_SurfArea	rs71373572	A	G	-1745.31	184.238	2.716e-21	21100
Full_SurfArea	17:43525346_TAG_T	d	R	-1750.74	186.305	5.604e-21	20714
Full_SurfArea	rs62065379	T	C	-1757.68	184.631	1.733e-21	21100
Full_SurfArea	rs62065380	T	C	-1765.02	186.779	3.395e-21	20714
Full_SurfArea	rs112538459	T	C	-1749.45	184.523	2.52e-21	21100
Full_SurfArea	rs2077606	A	G	-1756.16	185.013	2.265e-21	21100
Full_SurfArea	rs2960000	T	C	1877.6	191.541	1.097e-22	21100
Full_SurfArea	rs62065385	T	C	-1784.92	186.253	9.399e-22	21100
Full_SurfArea	rs55703888	T	C	-1776.93	185.753	1.11e-21	21100
Full_SurfArea	rs56005713	T	C	-1779.89	185.702	9.278e-22	21100
Full_SurfArea	rs111423688	A	G	-1800.07	186.48	4.779e-22	21100
Full_SurfArea	rs62065389	T	G	1808.9	186.688	3.344e-22	21100
Full_SurfArea	rs62065390	A	G	-1813.06	189.522	1.106e-21	20714
Full_SurfArea	rs62065391	C	G	-1814.11	190.058	1.36e-21	20714
Full_SurfArea	rs62065392	A	G	-1811.78	189.437	1.133e-21	20714
Full_SurfArea	rs1971631	C	G	1979.02	209.929	4.217e-21	20714
Full_SurfArea	rs2684526	T	C	-1676.26	288.079	5.929e-09	10709
Full_SurfArea	rs4325608	A	G	-1840.03	189.202	2.354e-22	21100
Full_SurfArea	17:43540449	C	G	-2109.94	253.407	8.341e-17	16049
Full_SurfArea	rs148269941	A	T	1964.64	227.233	5.338e-18	18256
Full_SurfArea	rs2139890	A	C	-1795.98	188.665	1.742e-21	21100
Full_SurfArea	rs3946526	T	C	-1823.9	191.053	1.341e-21	21100
Full_SurfArea	rs200291097	I	R	-1917.38	230.398	8.646e-17	16411
Full_SurfArea	rs2959992	C	G	-2068.91	246.866	5.262e-17	15941
Full_SurfArea	rs55663797	A	G	-1810.14	188.577	8.076e-22	21100
Full_SurfArea	rs1879581	T	C	1754.57	193.76	1.361e-19	19903
Full_SurfArea	rs62065399	T	G	-1764.31	196.437	2.67e-19	19517
Full_SurfArea	rs9903522	A	G	973.966	187.298	1.992e-07	14851
Full_SurfArea	17:43547481	A	G	-1055.19	224.243	2.532e-06	11551
Full_SurfArea	17:43548056	A	G	-1077.33	217.522	7.317e-07	12531
Full_SurfArea	17:43548147	T	C	1019.68	208.615	1.019e-06	12703
Full_SurfArea	rs55930887	T	C	2050.54	244.635	5.203e-17	15941
Full_SurfArea	rs55671319	A	G	1791.83	201.315	5.551e-19	16327
Full_SurfArea	rs55652155	A	G	1775.81	201.065	1.028e-18	16327
Full_SurfArea	rs17631676	A	G	1785.48	198.642	2.508e-19	16327
Full_SurfArea	rs149366495	A	G	-1798.01	199.578	2.078e-19	16327
Full_SurfArea	rs2090847	A	G	1795.28	202.493	7.591e-19	16327
Full_SurfArea	rs55746869	T	C	-1843.78	204.537	1.979e-19	16327
Full_SurfArea	rs12950965	C	G	1836.66	209.719	1.992e-18	16327
Full_SurfArea	rs56015792	C	G	-1803.45	201.492	3.541e-19	16327
Full_SurfArea	17:43551428:AT_A	d	R	-2011.59	252.128	1.482e-15	12738
Full_SurfArea	rs62065403	T	C	1824.77	208.501	2.098e-18	15941
Full_SurfArea	rs77132763	T	C	-1839.62	208.924	1.306e-18	15941
Full_SurfArea	rs62065404	T	C	-1825.28	205.909	7.685e-19	16327
Full_SurfArea	rs2037442	T	C	1074.35	186.663	8.637e-09	14959
Full_SurfArea	rs4792859	T	C	1019.13	186.505	4.645e-08	14573
Full_SurfArea	rs71238846	A	G	-1828.76	206.37	7.893e-19	16327
Full_SurfArea	rs12452076	C	G	-1834.47	208.153	1.218e-18	16327
Full_SurfArea	rs2521859	A	G	2256.16	258.454	2.559e-18	15941
Full_SurfArea	rs12452273	T	C	-1845.64	209.95	1.484e-18	16327
Full_SurfArea	rs7218394	T	C	-995.049	183.736	6.107e-08	14959
Full_SurfArea	rs56192752	A	G	1850.51	209.79	1.137e-18	16327
Full_SurfArea	rs62065436	A	G	-1863.1	211.536	1.28e-18	16327
Full_SurfArea	rs55925547	T	C	1889.63	213.372	8.292e-19	15990
Full_SurfArea	rs56159231	T	C	-1946.43	219.202	6.708e-19	15941
Full_SurfArea	rs4792860	T	C	1005.69	190.605	1.318e-07	14573
Full_SurfArea	rs55643511	A	G	-1866.75	212.251	1.431e-18	16327
Full_SurfArea	rs62065437	A	G	-1867.77	212.479	1.49e-18	16327
Full_SurfArea	rs62065438	T	C	-1918.48	213.631	2.699e-19	16327
Full_SurfArea	rs28521823	T	C	958.729	188.874	3.854e-07	14573
Full_SurfArea	rs62065441	A	G	2025.37	232.668	3.177e-18	15604
Full_SurfArea	rs112275793	A	C	2135.28	256.575	8.629e-17	14686
Full_SurfArea	rs112995489	T	G	2131.33	257.67	1.322e-16	14686
Full_SurfArea	rs111960572	A	G	-2145.19	252.325	1.868e-17	14686
Full_SurfArea	rs62065442	T	C	1934.02	220.352	1.68e-18	15990
Full_SurfArea	rs9899111	T	G	1932.17	220.411	1.847e-18	15990
Full_SurfArea	rs62065444	T	C	1985.14	231.271	9.194e-18	15604
Full_SurfArea	rs62065445	A	G	-1946.99	221.129	1.311e-18	15990
Full_SurfArea	rs1879585	T	G	1969.84	223.592	1.252e-18	15990
Full_SurfArea	rs1879586	C	G	2168.69	250.509	4.838e-18	14457
Full_SurfArea	17:43568927:T_TA	I	R	-2071.56	252.858	2.557e-16	13734
Full_SurfArea	rs111392251	A	T	-2022.27	231.174	2.175e-18	15604
Full_SurfArea	17:43569001_CA_C	d	R	-2004.47	228.819	1.952e-18	15604
Full_SurfArea	rs62065447	T	C	-2006.15	229.049	1.976e-18	15604
Full_SurfArea	rs113322852	A	T	-1939.08	229.106	2.591e-17	15401
Full_SurfArea	rs62065448	T	C	-1941.7	229.614	2.759e-17	15458
Full_SurfArea	rs62065449	T	C	1938.75	231.993	6.436e-17	15229
Full_SurfArea	rs62065450	T	C	-1949.35	267.325	3.052e-13	11719
Full_SurfArea	rs1879583	T	C	-2003.11	240.418	7.963e-17	14340
Full_SurfArea	rs9905348	A	G	940.565	187.237	5.077e-07	14959
Full_SurfArea	rs36047693	C	G	-1610.6	253.694	2.173e-10	10502
Full_SurfArea	rs34195569	A	G	-1610.15	253.621	2.172e-10	10502
Full_SurfArea	rs34579278	A	G	1610	253.61	2.177e-10	10502
Full_SurfArea	rs34211253	C	G	1609.92	253.613	2.182e-10	10502
Full_SurfArea	rs34008514	A	G	1609.68	253.596	2.19e-10	10502
Full_SurfArea	rs12943085	A	G	-1609.21	253.534	2.194e-10	10502
Full_SurfArea	rs7350923	T	C	-1745.34	243.801	8.134e-13	11669
Full_SurfArea	rs11079717	T	C	1826.25	240.821	3.366e-14	12172
Full_SurfArea	rs62055878	A	C	-1824.28	240.74	3.515e-14	12172
Full_SurfArea	rs76669427	A	T	-1742.24	243.746	8.821e-13	11669
Full_SurfArea	rs143196316	I	R	-1850.1	246.351	5.911e-14	11786
Full_SurfArea	rs74514268	A	G	-1822.33	240.557	3.579e-14	12172
Full_SurfArea	rs62055879	A	G	-1831.38	246.568	1.107e-13	11786
Full_SurfArea	rs12948216	T	C	-1819.35	240.304	3.702e-14	12172
Full_SurfArea	rs56013908	T	C	1817.86	240.201	3.788e-14	12172
Full_SurfArea	rs56168907	T	C	1817.23	240.152	3.82e-14	12172
Full_SurfArea	rs55747440	A	G	1764.06	237.106	1.007e-13	12722
Full_SurfArea	rs55801356	A	G	1763.58	237.079	1.016e-13	12722
Full_SurfArea	rs62055883	C	G	1762.53	237.012	1.034e-13	12722
Full_SurfArea	rs62055884	T	C	-1726.42	232.991	1.265e-13	13210
Full_SurfArea	rs79882507	A	G	1736.42	233.023	9.211e-14	13210
Full_SurfArea	rs62055885	A	G	1756.54	224.58	5.222e-15	14206
Full_SurfArea	rs28439278	T	C	-1756.28	224.544	5.217e-15	14206
Full_SurfArea	rs12150621	T	G	-1722.67	222.248	9.109e-15	14592
Full_SurfArea	rs62055886	A	G	-1717.95	222.011	1.009e-14	14592
Full_SurfArea	rs62055887	T	C	1756.38	220.109	1.468e-15	14867
Full_SurfArea	rs62055888	T	C	-1718.29	222.755	1.221e-14	14592
Full_SurfArea	rs62055889	A	G	-1761.15	220.681	1.457e-15	14867
Full_SurfArea	rs71375313	A	G	-1757.08	220.074	1.416e-15	14867
Full_SurfArea	rs11079718	A	T	1813.09	220.396	1.928e-16	14867
Full_SurfArea	rs11079719	T	G	1777.04	219.274	5.308e-16	14867
Full_SurfArea	rs11079720	A	G	-1758.37	218.595	8.699e-16	14867
Full_SurfArea	rs11079721	A	C	-1782.61	215.993	1.544e-16	15227
Full_SurfArea	rs62055890	T	C	-1778.33	215.488	1.55e-16	15227
Full_SurfArea	17:43840723:A_ACT	I	R	-1843.3	242.634	3.03e-14	12971
Full_SurfArea	rs111697872	I	R	-1820.43	218.208	7.264e-17	14841
Full_SurfArea	rs77849344	A	G	-1770.84	214.468	1.495e-16	15227
Full_SurfArea	rs74918686	C	G	-1770.2	214.445	1.521e-16	15227
Full_SurfArea	rs79545140	T	C	1774.42	213.693	1.01e-16	15399
Full_SurfArea	rs56369036	A	T	-1768.5	212.998	1.016e-16	15399
Full_SurfArea	rs11079723	T	C	1767.03	214.11	1.546e-16	15227
Full_SurfArea	rs11079724	T	C	-1769.54	212.868	9.345e-17	15399
Full_SurfArea	rs55707339	T	C	1766.46	212.742	1.013e-16	15399
Full_SurfArea	rs62055893	A	G	1765.47	212.541	9.858e-17	15399
Full_SurfArea	rs75257002	T	C	-1759.26	212.263	1.151e-16	15399
Full_SurfArea	rs62055894	A	G	-1757.55	212.123	1.176e-16	15399
Full_SurfArea	rs62055895	A	G	1756.98	212.07	1.182e-16	15399
Full_SurfArea	rs62055896	T	C	-1750.89	211.303	1.17e-16	15399
Full_SurfArea	rs55725840	A	T	-1750.11	210.886	1.051e-16	15399
Full_SurfArea	rs56194509	T	G	1765.49	214.073	1.622e-16	15227
Full_SurfArea	rs55657917	T	G	1769.79	213.376	1.093e-16	15399
Full_SurfArea	rs56082319	A	G	-1747.27	210.63	1.082e-16	15399
Full_SurfArea	rs56109643	A	G	1778.92	208.265	1.323e-17	15830
Full_SurfArea	rs62055899	A	T	-1776.53	208.033	1.346e-17	15830
Full_SurfArea	rs62055900	C	G	1776.41	207.96	1.319e-17	15830
Full_SurfArea	rs62055901	A	G	-1776.12	207.889	1.301e-17	15830
Full_SurfArea	rs58089049	T	C	-1335.31	209.764	1.943e-10	13871
Full_SurfArea	rs62055903	A	C	-1771.6	207.4	1.32e-17	15830
Full_SurfArea	rs111374028	A	G	-1771.49	207.243	1.254e-17	15830
Full_SurfArea	rs113934115	T	C	-1792.88	209.121	1.005e-17	15830
Full_SurfArea	rs113762994	T	C	-1788.4	210.497	1.961e-17	15444
Full_SurfArea	rs62055928	A	G	-1763.42	206.667	1.43e-17	15830
Full_SurfArea	rs56268325	T	C	1764.28	206.185	1.161e-17	15830
Full_SurfArea	rs56070245	T	C	1763.36	206.127	1.182e-17	15830
Full_SurfArea	rs56387266	T	C	1763	205.978	1.137e-17	15830
Full_SurfArea	rs34303488	T	C	-1761.85	205.844	1.137e-17	15830
Full_SurfArea	rs62055932	A	G	1766.27	205.623	8.711e-18	15830
Full_SurfArea	rs62055933	A	G	-1776.88	206.057	6.507e-18	15830
Full_SurfArea	rs62055934	A	G	-1786.6	211.41	2.891e-17	15444
Full_SurfArea	17:43848646_AG_A	d	R	-1774.99	208.706	1.82e-17	15444
Full_SurfArea	rs62055935	T	C	1769.47	205.826	8.187e-18	15830
Full_SurfArea	rs62055936	A	T	-1765.74	205.773	9.405e-18	15830
Full_SurfArea	rs62055937	T	G	-1758.51	205	9.647e-18	15830
Full_SurfArea	rs76294809	A	G	-1758.79	204.921	9.261e-18	15830
Full_SurfArea	rs75916678	T	C	1755.38	204.788	1.02e-17	15830
Full_SurfArea	rs79730878	T	C	1742.96	195.468	4.796e-19	18313
Full_SurfArea	17:43849572_AT_A	d	R	-1776.75	208.836	1.771e-17	15444
Full_SurfArea	rs62055938	A	C	-1748.4	203.989	1.025e-17	15938
Full_SurfArea	rs62055939	A	T	1756.88	200.535	1.936e-18	16673
Full_SurfArea	rs62055940	A	G	1755.56	200.383	1.935e-18	16673
Full_SurfArea	rs76885724	T	C	-1755.12	200.298	1.909e-18	16673
Full_SurfArea	rs60814418	T	C	-1745.53	203.659	1.028e-17	15830
Full_SurfArea	rs113518470	T	C	-1724.73	213.274	6.118e-16	15444
Full_SurfArea	17:43850935_CA_C	d	R	-1827.2	215.81	2.524e-17	15444
Full_SurfArea	rs62055942	A	G	1766.84	199.01	6.797e-19	16955
Full_SurfArea	rs62055943	T	C	1766.64	198.725	6.118e-19	16955
Full_SurfArea	rs113246445	I	R	-1783.3	201.791	9.801e-19	16569
Full_SurfArea	rs35909029	T	C	-732.584	156.744	2.957e-06	19690
Full_SurfArea	rs62055945	A	G	-1738.44	193.88	3.058e-19	18313
Full_SurfArea	rs62055946	A	C	-1735.2	193.687	3.283e-19	18313
Full_SurfArea	rs62055947	T	C	-1731.06	193.571	3.795e-19	18313
Full_SurfArea	rs62055948	T	C	1730.59	193.516	3.791e-19	18313
Full_SurfArea	rs113871181	A	G	-1733.59	193.461	3.219e-19	18313
Full_SurfArea	rs111370985	T	C	1733.64	193.386	3.112e-19	18313
Full_SurfArea	rs55787105	A	G	-1733.78	193.3	2.982e-19	18313
Full_SurfArea	rs62055950	T	C	1731.73	193.206	3.156e-19	18313
Full_SurfArea	rs56043078	T	G	1730.65	193.08	3.149e-19	18313
Full_SurfArea	rs77965652	A	G	1729.59	193.044	3.259e-19	18313
Full_SurfArea	rs55849949	A	G	1729.88	192.971	3.119e-19	18313
Full_SurfArea	17:43853922	A	G	-1733.49	192.604	2.252e-19	18313
Full_SurfArea	rs55991914	T	C	-1728.78	192.403	2.583e-19	18313
Full_SurfArea	rs62055955	A	G	1726.3	192.374	2.868e-19	18313
Full_SurfArea	rs62055956	T	C	-1726.47	192.302	2.759e-19	18313
Full_SurfArea	rs12938031	A	G	757.398	161.173	2.611e-06	19690
Full_SurfArea	rs62055957	A	C	-1725.41	192.186	2.762e-19	18313
Full_SurfArea	rs34186148	C	G	-1176.49	165.943	1.344e-12	18516
Full_SurfArea	rs4074462	T	G	-1743.17	191.902	1.05e-19	18313
Full_SurfArea	rs4076453	A	G	-774.89	166.689	3.34e-06	18878
Full_SurfArea	rs111878933	A	C	-1780.28	221.23	8.471e-16	16057
Full_SurfArea	rs111735741	A	G	-1723.67	187.854	4.491e-20	18897
Full_SurfArea	rs35076622	A	G	-1168.58	163.245	8.159e-13	18516
Full_SurfArea	rs62057061	C	G	1711.67	185.083	2.285e-20	19283
Full_SurfArea	rs62057062	A	G	-1711.37	185.054	2.288e-20	19283
Full_SurfArea	rs62057063	T	C	-1720.37	186.526	2.884e-20	19283
Full_SurfArea	rs62057064	T	C	-1709.87	184.913	2.312e-20	19283
Full_SurfArea	rs76830096	A	C	1708.56	184.785	2.326e-20	19283
Full_SurfArea	rs111433752	T	G	1903.75	233.953	4.042e-16	15013
Full_SurfArea	rs111664122	T	C	1895.48	233.981	5.45e-16	15013
Full_SurfArea	rs62057065	T	G	-1710.56	185.554	3.009e-20	19283
Full_SurfArea	rs62057066	T	C	1731.29	189.927	7.829e-20	18897
Full_SurfArea	rs62057067	T	C	-1722.02	186.319	2.412e-20	19283
Full_SurfArea	rs78917495	T	C	-1688.05	183.2	3.135e-20	19512
Full_SurfArea	rs62057068	A	G	1687.38	183.065	3.045e-20	19512
Full_SurfArea	rs62057069	T	C	1688.72	182.97	2.72e-20	19512
Full_SurfArea	rs62057070	A	G	1683.12	182.353	2.707e-20	19512
Full_SurfArea	rs62057071	C	G	1682.27	182.341	2.811e-20	19512
Full_SurfArea	rs145503157	I	R	-1690.02	184.904	6.246e-20	19126
Full_SurfArea	rs62057073	T	C	-1698.97	185.918	6.348e-20	19283
Full_SurfArea	rs56319902	T	C	-1652.62	179.025	2.676e-20	19512
Full_SurfArea	rs55943044	A	G	-1648.04	178.94	3.26e-20	19512
Full_SurfArea	rs80184151	A	G	1632.94	177.126	2.998e-20	19512
Full_SurfArea	rs17689378	T	C	-1627.67	176.553	2.994e-20	19512
Full_SurfArea	rs62057101	A	G	-1627.09	176.093	2.466e-20	19512
Full_SurfArea	rs62057103	T	C	1630.41	175.961	1.936e-20	19512
Full_SurfArea	rs55915917	T	G	1675.85	182.846	4.937e-20	19512
Full_SurfArea	rs55668363	A	G	-1666.42	183.177	9.259e-20	19512
Full_SurfArea	rs17689471	T	C	1631.21	175.393	1.4e-20	19512
Full_SurfArea	17:43893146:CCCAG	d	R	-1680.97	182.425	3.124e-20	19126
Full_SurfArea	rs117365970	A	G	-1683.69	183.105	3.743e-20	19512
Full_SurfArea	rs117646503	T	C	1700.08	182.893	1.465e-20	19512
Full_SurfArea	rs17762769	A	G	-1632.87	175.366	1.264e-20	19512
Full_SurfArea	rs8072451	T	C	-1630.09	175.258	1.391e-20	19512
Full_SurfArea	rs8073146	A	G	1629.95	175.256	1.399e-20	19512
Full_SurfArea	17:43893766:TCTGC	d	R	-1788.09	208.622	1.026e-17	17256
Full_SurfArea	17:43893772:TGCCT	d	R	-1779.35	207.768	1.089e-17	17256
Full_SurfArea	rs28364025	T	C	1633.25	175.278	1.185e-20	19512
Full_SurfArea	rs28364023	T	C	-1631.98	175.273	1.266e-20	19512
Full_SurfArea	17:43894481:T_TG	I	R	-1687.68	190.681	8.689e-19	17256
Full_SurfArea	rs55757142	I	R	-1676.59	179.326	8.816e-21	19126
Full_SurfArea	rs55779147	A	G	-1637.66	175.787	1.206e-20	19512
Full_SurfArea	rs56357543	T	C	-1637.46	175.774	1.211e-20	19512
Full_SurfArea	rs56099546	A	G	1637.36	175.768	1.214e-20	19512
Full_SurfArea	rs739645	T	G	1636.22	175.739	1.272e-20	19512
Full_SurfArea	rs739644	C	G	1636.39	175.737	1.259e-20	19512
Full_SurfArea	rs113651837	I	R	-1645.5	177.913	2.268e-20	19126
Full_SurfArea	rs4564621	C	G	-1636.49	175.729	1.248e-20	19512
Full_SurfArea	rs2316763	T	C	-1652.08	175.74	5.42e-21	19512
Full_SurfArea	rs2316764	T	G	1629.33	175.122	1.353e-20	19512
Full_SurfArea	rs4277389	A	G	1637.72	175.142	8.696e-21	19512
Full_SurfArea	rs4566211	A	G	-1630.52	175.109	1.261e-20	19512
Full_SurfArea	rs4566212	A	G	-1630.61	175.104	1.251e-20	19512
Full_SurfArea	rs4309444	T	C	1630.64	175.1	1.247e-20	19512
Full_SurfArea	rs62057107	T	C	-1633.82	175.362	1.198e-20	19512
Full_SurfArea	rs12150390	T	C	1630.55	175.073	1.236e-20	19512
Full_SurfArea	rs17689608	C	G	1631.34	175.059	1.177e-20	19512
Full_SurfArea	rs62057108	T	C	1630.66	175.084	1.236e-20	19512
Full_SurfArea	rs62057109	T	C	1630.73	175.079	1.229e-20	19512
Full_SurfArea	rs78074121	T	C	1629.5	175.072	1.308e-20	19512
Full_SurfArea	rs62057110	T	C	1626.5	175.163	1.607e-20	19512
Full_SurfArea	17:43896862_CT_C	d	R	-1708.29	192.781	7.911e-19	19126
Full_SurfArea	17:43897026_TGGAG_T	d	R	-1637.72	177.147	2.353e-20	19126
Full_SurfArea	rs62057111	A	G	1629.7	174.953	1.219e-20	19512
Full_SurfArea	rs62057112	A	T	-1629.03	174.931	1.25e-20	19512
Full_SurfArea	rs78587102	A	G	1630.93	174.913	1.118e-20	19512
Full_SurfArea	rs62057113	A	T	1665.45	176.696	4.279e-21	19512
Full_SurfArea	rs78506181	A	G	1665.44	176.689	4.267e-21	19512
Full_SurfArea	rs79600142	T	C	1665.48	176.678	4.235e-21	19512
Full_SurfArea	17:43898362_AAGG_A	d	R	-1639.6	177.049	2.03e-20	19126
Full_SurfArea	rs242937	A	G	-838.517	146.685	1.088e-08	18516
Full_SurfArea	rs111739681	T	C	-1631.23	174.875	1.079e-20	19512
Full_SurfArea	rs17762882	T	C	1631.36	174.874	1.071e-20	19512
Full_SurfArea	rs17689653	A	T	1631.45	174.859	1.058e-20	19512
Full_SurfArea	rs17762912	A	C	1631.79	174.856	1.037e-20	19512
Full_SurfArea	rs62057114	T	C	-1631.91	174.827	1.015e-20	19512
Full_SurfArea	rs62057115	C	G	-1632	174.811	1.003e-20	19512
Full_SurfArea	rs78917479	T	C	-1632.12	174.804	9.925e-21	19512
Full_SurfArea	rs62057116	T	C	1632.13	174.816	9.979e-21	19512
Full_SurfArea	rs62057117	C	G	1632.42	174.801	9.75e-21	19512
Full_SurfArea	rs62057118	A	G	1632.38	174.727	9.411e-21	19512
Full_SurfArea	rs62057119	A	G	-1632.42	174.714	9.333e-21	19512
Full_SurfArea	rs17762954	T	C	-1632.42	174.706	9.293e-21	19512
Full_SurfArea	rs55979424	T	C	-1641.07	176.873	1.722e-20	19126
Full_SurfArea	rs55638417	A	G	1654.8	175.862	4.978e-21	19512
Full_SurfArea	rs79501144	T	C	-1632.02	174.682	9.383e-21	19512
Full_SurfArea	rs62057121	A	G	-1659.08	180.217	3.384e-20	19126
Full_SurfArea	17:43900769	T	C	-1872.89	208.947	3.146e-19	17256
Full_SurfArea	rs112137135	A	G	1642.4	175.862	9.71e-21	19512
Full_SurfArea	rs62057122	T	C	-1638.49	174.818	7.078e-21	19512
Full_SurfArea	rs173365	A	G	-839.657	146.476	9.902e-09	18516
Full_SurfArea	rs62057123	A	G	1633.68	174.641	8.402e-21	19512
Full_SurfArea	rs62057143	T	C	1634.43	174.676	8.21e-21	19512
Full_SurfArea	rs62057144	A	G	1635.66	174.966	8.897e-21	19512
Full_SurfArea	rs4335809	T	C	-1634.81	174.669	8.014e-21	19512
Full_SurfArea	rs4341787	T	C	-1635.46	174.695	7.837e-21	19512
Full_SurfArea	rs4523962	A	G	-1635.27	174.68	7.86e-21	19512
Full_SurfArea	rs4327090	A	G	1687.14	190.255	7.462e-19	19512
Full_SurfArea	rs3885074	A	C	-1636.55	174.671	7.3e-21	19512
Full_SurfArea	rs3885075	A	G	1636.66	174.674	7.268e-21	19512
Full_SurfArea	rs41280116	T	C	-1639.42	175.419	9.125e-21	19512
Full_SurfArea	rs34283254	A	C	-1639.67	175.459	9.185e-21	19512
Full_SurfArea	rs1912151	T	C	-1637.72	174.723	7.032e-21	19512
Full_SurfArea	rs1396862	A	G	-1637.91	174.719	6.949e-21	19512
Full_SurfArea	rs41280118	T	C	-1639.13	174.795	6.759e-21	19512
Full_SurfArea	rs62057146	A	G	1639.04	174.799	6.805e-21	19512
Full_SurfArea	rs62057147	A	G	-1627.84	174.76	1.223e-20	19512
Full_SurfArea	rs17763050	A	G	-1640.78	174.856	6.375e-21	19512
Full_SurfArea	rs62057148	C	G	-1640.9	174.869	6.374e-21	19512
Full_SurfArea	rs62057149	A	G	1640.23	174.886	6.671e-21	19512
Full_SurfArea	rs62057150	T	C	-1640.36	174.889	6.631e-21	19512
Full_SurfArea	rs62057151	T	C	-1615.82	174.929	2.534e-20	19512
Full_SurfArea	rs62057152	C	G	-1641.97	174.954	6.283e-21	19512
Full_SurfArea	rs17689824	T	C	-1642.05	174.998	6.398e-21	19512
Full_SurfArea	rs62057153	T	C	1649.51	174.941	4.142e-21	19512
Full_SurfArea	rs62057154	T	C	-1641.75	174.975	6.426e-21	19512
Full_SurfArea	rs62057155	T	C	-1642.63	174.99	6.173e-21	19512
Full_SurfArea	rs62057156	C	G	-1643	175.002	6.09e-21	19512
Full_SurfArea	rs78872653	A	G	-1646.34	175.803	7.63e-21	19512
Full_SurfArea	rs62057157	C	G	-1643.4	175.006	5.972e-21	19512
Full_SurfArea	rs17763086	T	G	1640.91	175.025	6.898e-21	19512
Full_SurfArea	rs17425752	A	C	1631.25	175.736	1.657e-20	19512
Full_SurfArea	rs17689882	A	G	-1629.94	175.716	1.759e-20	19512
Full_SurfArea	rs62057158	A	G	-1638.51	175.041	7.92e-21	19512
Full_SurfArea	rs3029044	I	R	-1647.16	177.259	1.508e-20	19126
Full_SurfArea	rs1876831	T	C	-1636.93	175.283	9.742e-21	19512
Full_SurfArea	rs16940665	T	C	1642.46	175.094	6.566e-21	19512
Full_SurfArea	rs16940668	A	G	-1642.46	175.104	6.604e-21	19512
Full_SurfArea	rs16940671	T	C	-1772.12	193.394	5.034e-20	19122
Full_SurfArea	rs16940672	T	C	-1772.23	193.431	5.092e-20	19122
Full_SurfArea	17:43908476:GT_G	d	R	-1652.35	177.456	1.262e-20	19126
Full_SurfArea	17:43908571:T_TTC	I	R	-1823.34	210.494	4.628e-18	16866
Full_SurfArea	17:43908573:C_CAG	I	R	-1839.56	221.961	1.154e-16	14223
Full_SurfArea	rs55763795	C	G	-1645.68	175.563	6.999e-21	19512
Full_SurfArea	rs55865707	T	G	1645.64	175.572	7.049e-21	19512
Full_SurfArea	rs62054760	T	C	-1646.81	175.825	7.52e-21	19512
Full_SurfArea	rs62054761	T	C	-1645.59	175.845	8.111e-21	19512
Full_SurfArea	rs62054762	T	G	-1645.72	175.858	8.106e-21	19512
Full_SurfArea	rs242951	T	C	865.873	149.066	6.298e-09	18516
Full_SurfArea	17:43909435:C_CAA	I	R	-1743.36	195.153	4.134e-19	17836
Full_SurfArea	rs17689918	A	G	-1642.76	175.943	9.924e-21	19512
Full_SurfArea	rs17763199	A	G	-1645.42	175.991	8.81e-21	19512
Full_SurfArea	rs62054763	C	G	1647.7	176.179	8.564e-21	19512
Full_SurfArea	rs17689966	A	G	857.731	149.015	8.613e-09	18516
Full_SurfArea	rs16940674	T	C	-1646.86	176.265	9.356e-21	19512
Full_SurfArea	rs16940676	A	G	-1648.77	176.495	9.476e-21	19512
Full_SurfArea	rs1876830	T	C	-1650.1	176.617	9.381e-21	19512
Full_SurfArea	rs41457044	T	C	-1650.82	176.68	9.316e-21	19512
Full_SurfArea	rs1876829	T	C	1652.04	176.823	9.376e-21	19512
Full_SurfArea	rs1876828	T	C	-1652.56	176.987	9.89e-21	19512
Full_SurfArea	rs1876827	T	C	1654.72	177.125	9.444e-21	19512
Full_SurfArea	rs16940677	T	C	-1639.71	178.074	3.323e-20	19191
Full_SurfArea	rs16940681	C	G	-1639.7	178.311	3.725e-20	19191
Full_SurfArea	rs112691859	I	R	-1647.17	180.759	8.048e-20	18805
Full_SurfArea	rs28364021	T	C	-1641.11	178.523	3.832e-20	19191
Full_SurfArea	rs2316765	T	C	1632.96	179.401	8.844e-20	18909
Full_SurfArea	rs878886	C	G	1632.22	179.409	9.221e-20	18909
Full_SurfArea	rs878887	T	C	-1633.17	179.464	9.015e-20	18909
Full_SurfArea	rs878888	A	G	1626.27	179.547	1.334e-19	18909
Full_SurfArea	rs4525537	T	C	1633.19	179.568	9.446e-20	18909
Full_SurfArea	rs4640231	C	G	-1638.89	179.846	8.033e-20	18909
Full_SurfArea	rs4482334	T	C	1636.23	180.116	1.044e-19	18909
Full_SurfArea	rs56127111	T	C	-1638.17	180.455	1.106e-19	18909
Full_SurfArea	17:43913360_TGAGGGCAGGAGG_T	d	R	-1648.41	183.02	2.124e-19	18523
Full_SurfArea	rs242948	T	G	891.043	153.358	6.24e-09	18408
Full_SurfArea	rs75104593	T	G	1759.78	200.612	1.754e-18	16479
Full_SurfArea	rs74998289	T	G	1747.49	200.555	2.953e-18	16479
Full_SurfArea	rs10445362	A	C	-1650.43	181.858	1.132e-19	18909
Full_SurfArea	rs10445363	A	G	-1621.81	184.526	1.508e-18	18174
Full_SurfArea	rs62054802	C	G	-1652.34	182.093	1.145e-19	18909
Full_SurfArea	rs62054803	T	G	-1643.31	185.258	7.29e-19	17945
Full_SurfArea	rs62054804	T	C	-1643.89	185.348	7.367e-19	17945
Full_SurfArea	17:43914979_AC_A	d	R	-1744.18	200.762	3.696e-18	15444
Full_SurfArea	17:43914990_AAC_A	d	R	-1733.81	201.321	7.17e-18	15444
Full_SurfArea	rs62054805	A	G	1688.98	192.265	1.569e-18	16479
Full_SurfArea	rs62054806	T	C	-1677.2	190.169	1.149e-18	16587
Full_SurfArea	rs62054807	T	C	-1288.78	166.652	1.048e-14	19512
Full_SurfArea	rs10445364	A	G	-1693.06	191.606	9.906e-19	16479
Full_SurfArea	rs10445333	A	G	1701.04	194.33	2.071e-18	15830
Full_SurfArea	rs17690176	A	C	1701.83	194.469	2.112e-18	15830
Full_SurfArea	rs78328427	A	G	-1702.11	194.712	2.297e-18	15830
Full_SurfArea	rs77692262	A	G	1703.3	194.87	2.317e-18	15830
Full_SurfArea	rs242947	A	G	901.128	157.463	1.048e-08	18408
Full_SurfArea	rs56023973	T	G	-1710.81	195.819	2.401e-18	15830
Full_SurfArea	rs17763515	A	G	-1713.53	196.126	2.397e-18	15830
Full_SurfArea	rs17763533	T	C	1717.79	196.586	2.371e-18	15830
Full_SurfArea	rs62054809	T	C	-1716.4	196.645	2.583e-18	15830
Full_SurfArea	17:43918301_GCCAGGAGTTCGAGA_G	d	R	-2108.9	231.113	7.175e-20	14786
Full_SurfArea	rs112583797	A	G	1719.02	197.002	2.641e-18	15830
Full_SurfArea	rs74922289	A	G	1719.99	197.091	2.618e-18	15830
Full_SurfArea	rs56971664	T	C	1717.72	196.998	2.794e-18	15830
Full_SurfArea	rs62054811	C	G	1722.11	197.302	2.586e-18	15830
Full_SurfArea	rs2316766	T	G	-1899.47	214.277	7.682e-19	15444
Full_SurfArea	rs2316767	T	C	1901.21	214.367	7.384e-19	15444
Full_SurfArea	rs2316768	T	G	-1901.4	214.395	7.403e-19	15444
Full_SurfArea	rs2106786	A	G	1795.28	204.14	1.438e-18	15444
Full_SurfArea	rs2106785	T	C	-1780.68	201.036	8.182e-19	15830
Full_SurfArea	rs56150806	T	C	1726.05	197.754	2.585e-18	15830
Full_SurfArea	rs17690314	T	G	1726.69	197.831	2.589e-18	15830
Full_SurfArea	17:43920219_AAAG_A	d	R	-1740.32	201.087	4.947e-18	15444
Full_SurfArea	rs56233672	T	C	1737.15	198.759	2.332e-18	15830
Full_SurfArea	rs56354807	T	C	-1727.81	197.972	2.602e-18	15830
Full_SurfArea	rs55718212	T	C	1728.04	198.061	2.668e-18	15830
Full_SurfArea	rs17690326	T	C	1729.13	198.261	2.746e-18	15830
Full_SurfArea	rs17763596	T	G	-1731.1	198.238	2.493e-18	15830
Full_SurfArea	rs62054814	A	T	-1729.99	198.375	2.762e-18	15830
Full_SurfArea	rs17763634	T	C	1730.26	198.404	2.76e-18	15830
Full_SurfArea	rs62621252	T	C	1731.89	198.781	2.971e-18	15830
Full_SurfArea	rs242944	A	G	928.802	160.907	7.82e-09	18408
Full_SurfArea	rs62054815	A	G	-1732.73	198.882	2.977e-18	15830
Full_SurfArea	rs12185233	C	G	-1735.06	199.024	2.835e-18	15830
Full_SurfArea	rs12185268	A	G	1735.13	199.053	2.859e-18	15830
Full_SurfArea	rs12185235	T	C	-1735.21	199.064	2.86e-18	15830
Full_SurfArea	rs11079725	T	C	1734.13	199.084	3.024e-18	15830
Full_SurfArea	rs12373123	T	C	1736.21	199.255	2.946e-18	15830
Full_SurfArea	rs12373139	A	G	-1736.43	199.292	2.96e-18	15830
Full_SurfArea	rs12373142	C	G	1728.15	200.745	7.393e-18	15830
Full_SurfArea	rs12373124	T	C	1736.06	200.832	5.412e-18	15830
Full_SurfArea	rs12373140	A	G	-1736.25	200.862	5.429e-18	15830
Full_SurfArea	rs12373168	A	C	1702.53	200.508	2.047e-17	15830
Full_SurfArea	rs17690661	A	G	-1742.72	201.086	4.456e-18	15830
Full_SurfArea	rs55943825	T	C	-1751.44	201.385	3.409e-18	15830
Full_SurfArea	rs17690679	A	G	1752.44	201.598	3.537e-18	15830
Full_SurfArea	rs17690703	T	C	-1532.98	197.169	7.548e-15	15722
Full_SurfArea	rs17769490	A	G	-1750.17	201.834	4.27e-18	15830
Full_SurfArea	rs77063768	A	G	1747.94	201.974	4.959e-18	15830
Full_SurfArea	rs62054817	A	G	-1749.73	202.399	5.383e-18	15830
Full_SurfArea	rs62054818	A	C	1750.19	202.536	5.553e-18	15830
Full_SurfArea	rs62054819	A	G	1746.54	203.651	9.813e-18	15830
Full_SurfArea	rs62054820	A	G	1751.93	202.813	5.712e-18	15830
Full_SurfArea	rs8079387	A	T	-1046.5	214.903	1.118e-06	14474
Full_SurfArea	rs56113217	A	G	1754.44	203.066	5.632e-18	15830
Full_SurfArea	rs56269136	T	C	-1755.08	203.216	5.794e-18	15830
Full_SurfArea	rs56385754	T	G	-1757.32	203.472	5.789e-18	15830
Full_SurfArea	rs17769552	A	G	-1805.43	208.424	4.623e-18	15830
Full_SurfArea	rs62054822	A	G	1736.66	203.547	1.438e-17	15830
Full_SurfArea	rs885639	T	G	1735.94	204.323	1.962e-17	15830
Full_SurfArea	rs62054823	A	G	1773.56	205.149	5.37e-18	15830
Full_SurfArea	rs62054824	T	C	-1781.4	207.832	1.023e-17	15722
Full_SurfArea	rs62054825	A	G	-1780.08	207.941	1.124e-17	15722
Full_SurfArea	rs79589869	A	C	-1783.09	208.079	1.041e-17	15722
Full_SurfArea	rs2316769	A	G	1822.88	211.873	7.723e-18	15000
Full_SurfArea	rs2873268	A	G	-1823.34	212.169	8.413e-18	15000
Full_SurfArea	rs4340365	T	C	-1824.6	212.388	8.63e-18	15000
Full_SurfArea	rs2873269	T	C	-1826.29	212.71	9.019e-18	15000
Full_SurfArea	rs56026128	C	G	-1793.55	242.517	1.408e-13	12174
Full_SurfArea	rs56329743	A	G	-1770.26	245.662	5.758e-13	11976
Full_SurfArea	rs56288604	A	G	1863	216.286	7.081e-18	14614
Full_SurfArea	rs17690987	T	C	1873.61	217.424	6.856e-18	14614
Full_SurfArea	rs56146262	A	C	-1806.86	225.27	1.05e-15	13528
Full_SurfArea	rs55942528	A	G	1589.5	244.966	8.659e-11	10647
Full_SurfArea	rs56254732	T	C	-1611.42	249.627	1.08e-10	10166
Full_SurfArea	rs116956554	A	G	-1683.26	244.255	5.524e-12	14343
Full_SurfArea	rs199461	A	G	-1358.3	166.36	3.218e-16	22253
Full_SurfArea	rs199460	A	C	1618.06	194.491	8.837e-17	22024
Full_SurfArea	rs199441	A	G	-1539.98	168.193	5.386e-20	22253
Full_SurfArea	17:44782224:A_AGT	I	R	-1717.1	190.822	2.29e-19	21867
Full_SurfArea	rs199437	A	T	-1288.53	155.253	1.045e-16	22253
Full_SurfArea	rs1378358	T	C	-1644.77	168.989	2.18e-22	22253
Full_SurfArea	rs538628	C	G	-1628.89	168.619	4.451e-22	22253
Full_SurfArea	rs183211	A	G	-1281.45	154.327	1.011e-16	22253
Full_SurfArea	rs199436	A	G	1281.31	154.144	9.376e-17	22253
Full_SurfArea	rs169201	A	G	1545.19	162.942	2.469e-21	22253
Full_SurfArea	rs199438	A	G	-1280.08	153.861	8.817e-17	22253
Full_SurfArea	rs199439	A	G	1529.43	162.423	4.67e-21	22253
Full_SurfArea	rs142167	A	G	1272.64	152.956	8.774e-17	22253
Full_SurfArea	rs199457	T	C	-1537.33	162.084	2.43e-21	22253
Full_SurfArea	rs199456	T	C	-1535.93	161.978	2.486e-21	22253
Full_SurfArea	rs199455	T	C	1249.4	153.017	3.212e-16	22253
Full_SurfArea	rs7224296	A	G	1143.32	149.754	2.264e-14	22253
Full_SurfArea	rs199454	A	G	1247.22	152.883	3.408e-16	22253
Full_SurfArea	rs199453	T	C	-1262.67	152.927	1.498e-16	22253
Full_SurfArea	rs199452	T	C	-1271.47	152.932	9.256e-17	22253
Full_SurfArea	rs199451	A	G	-1544.49	161.901	1.432e-21	22253
Full_SurfArea	rs34162554	I	R	1252.01	156.092	1.049e-15	21867
Full_SurfArea	rs199449	A	G	-1275.24	153.066	7.993e-17	22253
Full_SurfArea	rs199448	A	G	1543.88	161.99	1.561e-21	22253
Full_SurfArea	rs199447	T	C	-1544.37	162.04	1.561e-21	22253
Full_SurfArea	rs199446	A	G	1250.6	153.314	3.431e-16	22253
Full_SurfArea	rs199445	T	C	-1531.35	161.669	2.742e-21	22253
Full_SurfArea	rs199444	T	C	1280.04	153.32	6.895e-17	22253
Full_SurfArea	rs199443	T	C	-1535.01	161.637	2.168e-21	22253
Full_SurfArea	rs199442	A	G	-1288.04	153.451	4.708e-17	22253
Full_SurfArea	rs199536	T	C	-1259.81	153.414	2.179e-16	22253
Full_SurfArea	rs199535	A	G	1581.19	161.528	1.256e-22	22253
Full_SurfArea	rs199534	T	G	1584.71	161.713	1.131e-22	22253
Full_SurfArea	rs9896243	C	G	1583.9	161.517	1.056e-22	22253
Full_SurfArea	rs199533	A	G	-1593.31	161.712	6.667e-23	22253
Full_SurfArea	rs199531	T	C	1297.33	153.827	3.348e-17	22253
Full_SurfArea	rs9912530	T	C	-1227.96	151.437	5.115e-16	22253
Full_SurfArea	rs199530	A	G	1317.18	154.275	1.368e-17	22253
Full_SurfArea	rs199529	A	C	1478.6	159.165	1.547e-20	22253
Full_SurfArea	rs199528	T	C	-1611.67	163.417	6.064e-23	22253
Full_SurfArea	rs199527	A	G	1335.31	156.116	1.196e-17	22253
Full_SurfArea	rs199526	C	G	-1405.45	159.877	1.485e-18	22253
Full_SurfArea	rs199525	T	G	1611.76	163.44	6.113e-23	22253
Full_SurfArea	rs199524	T	G	1323.27	155.589	1.818e-17	22253
Full_SurfArea	rs199523	A	C	1288.85	156.835	2.072e-16	22253
Full_SurfArea	rs199521	C	G	1316.89	155.826	2.887e-17	22253
Full_SurfArea	rs199520	A	G	1316.13	155.695	2.834e-17	22253
Full_SurfArea	rs199519	A	G	1314.67	155.704	3.082e-17	22253
Full_SurfArea	rs199518	A	C	-1350.35	159.347	2.366e-17	22253
Full_SurfArea	rs199517	A	G	-1345.51	159.153	2.81e-17	22253
Full_SurfArea	rs199516	T	C	1594.53	163.055	1.384e-22	22253
Full_SurfArea	rs199515	C	G	1589.39	163.283	2.16e-22	22253
Full_SurfArea	rs199514	A	G	1591.49	163.001	1.612e-22	22253
Full_SurfArea	rs199513	A	G	-1588.24	163.249	2.269e-22	22253
Full_SurfArea	rs199512	T	C	-1592.51	162.894	1.422e-22	22253
Full_SurfArea	rs199510	A	C	-1599.61	166.207	6.317e-22	21867
Full_SurfArea	rs199509	A	G	1593.25	162.894	1.36e-22	22253
Full_SurfArea	rs199508	C	G	-1334.99	155.968	1.135e-17	22253
Full_SurfArea	rs199507	A	G	-1593.02	162.886	1.372e-22	22253
Full_SurfArea	rs199506	A	G	-1592.08	163.201	1.751e-22	22253
Full_SurfArea	rs415430	T	C	1593.04	163.36	1.813e-22	22253
Full_SurfArea	rs430685	T	C	-1593.47	163.383	1.792e-22	22253
Full_SurfArea	rs199505	A	G	-1596.17	163.41	1.547e-22	22253
Full_SurfArea	rs70602	T	C	-1597.54	163.438	1.448e-22	22253
Full_SurfArea	rs70600	T	C	-1610.13	163.561	7.262e-23	22253
Full_SurfArea	rs199504	T	C	1586.15	163.484	2.952e-22	22253
Full_SurfArea	rs199503	A	G	-1668.59	168.914	5.167e-23	21867
Full_SurfArea	rs199502	A	G	-1464.25	161.379	1.154e-19	22253
Full_SurfArea	rs199501	A	G	-1355.01	157.439	7.527e-18	22253
Full_SurfArea	rs916888	T	C	1509.82	161.93	1.122e-20	22253
Full_SurfArea	rs199500	T	C	-1473.06	165.609	5.853e-19	22253
Full_SurfArea	rs2074404	T	G	1261.57	155.618	5.196e-16	22253
Full_SurfArea	rs199499	T	C	-1674.32	175.726	1.603e-21	22253
Full_SurfArea	rs199498	T	C	1474.98	168.767	2.336e-18	22253
Full_SurfArea	rs1563304	T	C	-1354.06	246.619	4.008e-08	14428
Full_SurfArea	rs9909861	A	C	648.546	140.624	3.99e-06	22253
Full_SurfArea	rs56117666	I	R	-728.468	156.754	3.365e-06	20944
Full_SurfArea	rs11079849	T	C	671.428	146.89	4.855e-06	22253
Full_SurfArea	rs9906944	T	C	662.503	145.05	4.938e-06	21791
Full_SurfArea	rs12452834	T	C	-813.822	150.389	6.252e-08	20944
Full_SurfArea	rs2969	T	C	-861.917	160.281	7.552e-08	21138
Full_SurfArea	rs28450941	A	G	-943.876	183.823	2.826e-07	17852
Full_SurfArea	rs12953186	T	C	-673.537	144.647	3.218e-06	21431
Full_SurfArea	rs11079853	T	C	-699.464	146.593	1.829e-06	21431
Full_SurfArea	rs12602595	T	C	-685.938	148.474	3.839e-06	21431
Full_SurfArea	rs17736216	T	C	-596.058	129.907	4.468e-06	22253
Full_SurfArea	rs2868312	A	G	656.754	140.38	2.891e-06	22253
Full_SurfArea	rs4377391	T	C	665.542	140.833	2.293e-06	22253
Full_SurfArea	rs11086974	A	G	662.832	140.605	2.427e-06	22253
Full_SurfArea	rs1825775	T	C	-656.795	140.742	3.061e-06	22253
Full_SurfArea	rs11086975	T	G	-670.343	144.274	3.379e-06	21867
Full_SurfArea	rs11086976	A	G	-673.111	144.036	2.965e-06	21867
Full_SurfArea	rs66480369	T	C	-653.602	140.982	3.551e-06	22253
Full_SurfArea	rs68074252	A	G	661.959	140.768	2.57e-06	22253
Full_SurfArea	rs67297650	A	G	681.583	141.542	1.469e-06	22253
Full_SurfArea	rs67538107	A	G	-660.117	141.166	2.923e-06	22253
Full_SurfArea	rs67705533	T	C	-662.306	141.155	2.705e-06	22253
Full_SurfArea	rs11705230	T	C	2097.3	428.856	1.006e-06	21622
Full_SurfArea	rs41311445	A	C	1429.87	312.473	4.74e-06	14450
Full_SurfArea	rs41277471	C	G	-1234.02	243.728	4.125e-07	19730
Full_SurfArea	rs62240962	T	C	-1207.12	251.47	1.585e-06	21828
Full_SurfArea	rs10483213	A	G	-1125.15	228.874	8.831e-07	22253
Full_SurfArea	rs74398520	I	R	-796.701	165.142	1.405e-06	17149
Full_SurfArea	rs12160976	A	G	-757.421	159.805	2.141e-06	18410
Full_SurfArea	rs11090796	T	C	763.125	165.626	4.075e-06	18410
Full_SurfArea	rs61074283	A	C	799.204	172.434	3.572e-06	17916
Full_SurfArea	rs1135856	T	C	750.738	164.182	4.817e-06	18535
Full_SurfArea	rs7285579	T	C	-756.338	162.314	3.166e-06	18535
Full_SurfArea	rs8137902	A	G	822.98	169.727	1.242e-06	18302
Full_SurfArea	rs8139201	T	C	722.031	156.014	3.693e-06	18535
Full_SurfArea	rs9627368	C	G	760.785	162.009	2.654e-06	18535
Full_Thickness	rs77780976	C	G	0.0091	0.002	3.324e-06	18481
Full_Thickness	1:39653649_TCTCCC_T	d	R	0.0057	0.0011	2.907e-07	22138
Full_Thickness	rs6692769	C	G	0.0046	0.001	1.285e-06	22757
Full_Thickness	rs11205802	T	C	0.0047	0.001	8.695e-07	22757
Full_Thickness	rs10888715	T	C	0.0046	0.001	1.061e-06	22757
Full_Thickness	rs596062	A	G	0.0044	0.001	4.593e-06	22949
Full_Thickness	rs598415	T	C	0.0044	0.001	4.324e-06	22949
Full_Thickness	rs613511	T	C	-0.005	0.0011	2.884e-06	22949
Full_Thickness	rs2490946	A	G	-0.0044	0.001	4.87e-06	22949
Full_Thickness	rs663449	A	G	-0.0044	0.001	3.496e-06	22949
Full_Thickness	rs1180383	A	G	-0.0044	0.001	3.876e-06	22949
Full_Thickness	rs1184716	T	C	-0.0044	0.001	3.458e-06	22949
Full_Thickness	rs635943	T	C	0.0047	0.001	1.141e-06	22949
Full_Thickness	rs586057	C	G	-0.0044	0.001	3.612e-06	22949
Full_Thickness	rs624971	T	C	-0.0044	0.001	3.546e-06	22949
Full_Thickness	1:39859478_CA_C	d	R	-0.0046	0.001	3.567e-06	22563
Full_Thickness	rs1180375	C	G	-0.0045	0.001	3.439e-06	22949
Full_Thickness	rs1180376	A	G	0.0045	0.001	2.978e-06	22949
Full_Thickness	rs1617212	A	G	0.0044	0.001	3.28e-06	22949
Full_Thickness	rs663892	A	G	-0.0044	0.001	3.416e-06	22949
Full_Thickness	rs1180384	T	C	0.0044	0.001	3.616e-06	22949
Full_Thickness	rs625384	T	C	-0.0044	0.001	3.258e-06	22949
Full_Thickness	rs683135	A	G	-0.0044	0.001	4.176e-06	22949
Full_Thickness	rs596705	T	C	0.0045	0.001	2.958e-06	22949
Full_Thickness	rs1180372	A	G	0.0046	0.001	2.081e-06	22949
Full_Thickness	rs587404	A	G	-0.0045	0.001	2.705e-06	22949
Full_Thickness	rs588326	A	G	0.0044	0.001	3.588e-06	22949
Full_Thickness	rs1775656	T	C	-0.0045	0.001	2.65e-06	22949
Full_Thickness	rs599892	C	G	0.0046	0.001	1.481e-06	22949
Full_Thickness	rs7540050	A	C	0.0045	0.001	3.219e-06	22949
Full_Thickness	rs7554206	T	C	-0.0045	0.001	2.49e-06	22949
Full_Thickness	rs6698791	A	T	-0.0044	0.001	3.843e-06	22949
Full_Thickness	rs10888788	A	G	0.0044	0.001	4.01e-06	22949
Full_Thickness	rs4617393	T	C	0.0044	0.001	3.714e-06	22949
Full_Thickness	rs12402990	A	G	0.0044	0.001	3.502e-06	22949
Full_Thickness	rs2473617	A	G	0.0049	0.001	2.939e-07	22563
Full_Thickness	rs1727098	T	C	0.0042	0.0009	1.915e-06	22949
Full_Thickness	rs1180341	T	C	-0.0041	0.0009	3.669e-06	22949
Full_Thickness	rs1180342	T	G	-0.0043	0.0009	2.527e-06	22949
Full_Thickness	rs1180343	T	C	-0.0042	0.0009	3.243e-06	22949
Full_Thickness	rs1180347	T	C	0.0041	0.0009	3.202e-06	22949
Full_Thickness	rs4660823	A	G	0.0048	0.0009	1.753e-07	22949
Full_Thickness	rs1180349	T	C	-0.0043	0.0009	9.574e-07	22949
Full_Thickness	rs1180351	A	C	0.0043	0.0009	9.944e-07	22949
Full_Thickness	rs1180352	A	C	0.0044	0.0009	6.091e-07	22716
Full_Thickness	rs1180329	A	G	0.0043	0.0009	1.288e-06	22949
Full_Thickness	rs1180331	A	G	0.0045	0.0009	4.611e-07	22949
Full_Thickness	rs1180334	A	G	-0.0043	0.0009	9.256e-07	22949
Full_Thickness	rs72663529	A	T	0.005	0.0009	8.825e-08	22949
Full_Thickness	rs2242500	A	G	0.0047	0.0009	2.161e-07	22949
Full_Thickness	rs16826349	A	G	-0.0047	0.0009	1.822e-07	22949
Full_Thickness	rs12028034	A	G	-0.0047	0.0009	2.052e-07	22949
Full_Thickness	rs67563067	A	G	0.0043	0.0009	1.101e-06	22949
Full_Thickness	rs11206377	A	G	-0.0043	0.0009	1.005e-06	22949
Full_Thickness	rs2243761	T	C	-0.0043	0.0009	9.743e-07	22949
Full_Thickness	rs11206386	A	G	0.0043	0.0009	1.123e-06	22949
Full_Thickness	rs11206388	T	C	0.0043	0.0009	1.984e-06	22563
Full_Thickness	rs2746050	T	G	-0.0041	0.0009	4.293e-06	22949
Full_Thickness	rs11206430	A	G	0.0045	0.0009	1.359e-06	22949
Full_Thickness	rs28788506	A	G	-0.0047	0.0009	5.228e-07	22949
Full_Thickness	rs11206437	A	C	0.0042	0.0009	4.479e-06	22757
Full_Thickness	rs4660311	A	G	0.0047	0.0009	4.93e-07	22949
Full_Thickness	rs1180321	T	C	-0.0052	0.0009	3.447e-08	22949
Full_Thickness	rs1180320	A	G	0.0043	0.0009	2.617e-06	22757
Full_Thickness	rs6690413	T	C	0.0041	0.0009	4.278e-06	22757
Full_Thickness	rs6587	A	G	0.0042	0.0009	3.857e-06	22757
Full_Thickness	rs2002058	T	C	0.0052	0.0011	3.394e-06	23166
Full_Thickness	rs56112387	T	C	0.0203	0.0039	2.249e-07	18108
Full_Thickness	rs78748374	C	G	-0.0185	0.0039	2.053e-06	18532
Full_Thickness	rs12069060	A	G	0.0054	0.0011	4.715e-07	22949
Full_Thickness	rs4657826	A	T	-0.0053	0.0011	5.923e-07	22949
Full_Thickness	rs12124794	A	T	-0.0053	0.0011	6.179e-07	22949
Full_Thickness	rs12041668	T	C	0.0055	0.0011	3.487e-07	22949
Full_Thickness	rs12032372	T	C	-0.0054	0.0011	3.829e-07	22949
Full_Thickness	rs61819952	T	C	0.0057	0.0011	4.689e-07	22949
Full_Thickness	rs10737679	T	G	0.0054	0.0011	4.077e-07	22949
Full_Thickness	rs1831281	T	C	0.0054	0.0011	3.566e-07	22949
Full_Thickness	rs12042805	A	G	0.0054	0.0011	3.896e-07	22949
Full_Thickness	rs10754200	T	C	-0.0053	0.0011	4.822e-07	22949
Full_Thickness	rs1587325	A	G	0.0053	0.0011	5.116e-07	22949
Full_Thickness	rs1329429	T	C	0.0054	0.0011	4.412e-07	22949
Full_Thickness	rs1576340	T	G	0.0054	0.0011	3.888e-07	22949
Full_Thickness	rs2284664	T	C	0.0054	0.0011	3.106e-07	22949
Full_Thickness	rs10801560	A	C	0.0057	0.0011	2.267e-07	22373
Full_Thickness	rs10801561	A	T	0.0058	0.0011	1.998e-07	22373
Full_Thickness	rs2133143	A	G	-0.0063	0.0012	1.467e-07	21987
Full_Thickness	rs150313019	C	G	-0.0061	0.0012	1.515e-07	21987
Full_Thickness	1:196721770_TG_T	d	R	0.0071	0.0015	3.244e-06	17987
Full_Thickness	rs433529	A	C	0.0068	0.0015	2.845e-06	17350
Full_Thickness	1:196818057	T	C	-0.0059	0.0012	2.021e-06	18919
Full_Thickness	rs10801571	T	G	-0.0062	0.0012	9.871e-08	21473
Full_Thickness	1:196818554	A	G	-0.0057	0.0012	2.239e-06	19305
Full_Thickness	rs10801572	A	G	-0.006	0.0011	1.4e-07	21473
Full_Thickness	rs12140033	A	T	-0.006	0.0011	1.869e-07	21087
Full_Thickness	rs1964645	T	C	0.0057	0.0011	2.823e-07	21702
Full_Thickness	rs1963605	A	C	-0.0057	0.0011	2.948e-07	21702
Full_Thickness	rs10922144	T	C	0.0059	0.0011	9.271e-08	22062
Full_Thickness	rs7416766	T	G	-0.0058	0.0011	1.346e-07	21676
Full_Thickness	rs2336501	T	C	0.0058	0.0011	1.261e-07	22062
Full_Thickness	rs1813718	A	G	0.0058	0.0011	1.165e-07	22062
Full_Thickness	rs10922146	T	C	0.0057	0.0011	1.306e-07	22062
Full_Thickness	rs12047098	T	C	-0.0058	0.0011	9.181e-08	22062
Full_Thickness	rs6657442	T	C	-0.0057	0.0011	1.769e-07	22062
Full_Thickness	rs7413265	T	G	0.0057	0.0011	1.929e-07	22062
Full_Thickness	rs1021636	A	G	-0.0058	0.0011	9.475e-08	22062
Full_Thickness	rs7413610	A	G	0.0053	0.0011	4.966e-07	22524
Full_Thickness	rs7367184	A	G	0.0053	0.0011	5.355e-07	22524
Full_Thickness	rs7366238	A	G	-0.0053	0.0011	4.94e-07	22524
Full_Thickness	rs12034928	A	G	0.0053	0.0011	4.933e-07	22524
Full_Thickness	rs10922147	C	G	-0.0053	0.0011	4.273e-07	22524
Full_Thickness	rs10801580	T	C	-0.0053	0.0011	3.823e-07	22524
Full_Thickness	rs4915559	T	C	-0.0053	0.0011	4.533e-07	22524
Full_Thickness	rs10737683	A	G	0.0054	0.0011	3.301e-07	22524
Full_Thickness	rs4915318	A	C	0.0054	0.0011	2.862e-07	22524
Full_Thickness	rs1819267	A	G	0.0046	0.001	4.031e-06	22949
Full_Thickness	1:196903936:G_GT	I	R	0.0055	0.0011	1.084e-06	22138
Full_Thickness	rs4915363	T	C	-0.0054	0.0011	8.979e-07	22138
Full_Thickness	rs12066959	A	G	0.0052	0.0011	1.373e-06	21720
Full_Thickness	rs4085749	T	C	0.0054	0.0011	3.23e-07	22716
Full_Thickness	rs3790414	A	T	0.0054	0.0011	3.459e-07	22716
Full_Thickness	rs1359593	A	T	-0.0053	0.0011	3.514e-07	22716
Full_Thickness	rs7531555	T	C	0.0054	0.001	3.32e-07	22716
Full_Thickness	rs10801582	A	G	0.0051	0.0011	1.277e-06	22716
Full_Thickness	rs111723669	A	G	0.0042	0.0009	3.936e-06	22949
Full_Thickness	2:27066877_TTTTTTTTC_T	d	R	0.0045	0.0009	1.077e-06	22563
Full_Thickness	rs12713992	A	G	-0.0045	0.0009	1.005e-06	22949
Full_Thickness	2:27067204:A_AT	I	R	0.005	0.0009	9.539e-08	21555
Full_Thickness	rs1368888	C	G	0.0045	0.0009	3.393e-07	22949
Full_Thickness	rs6717682	A	G	-0.0046	0.0009	2.733e-07	22949
Full_Thickness	rs770517841	d	R	0.0045	0.0009	8.337e-07	22563
Full_Thickness	rs13405539	T	C	0.0043	0.0009	1.896e-06	22949
Full_Thickness	rs1434058	T	C	-0.0048	0.0009	1.366e-07	22563
Full_Thickness	rs13418647	A	G	0.0043	0.0009	1.676e-06	22949
Full_Thickness	rs6710065	T	C	0.0045	0.0009	4.304e-07	22949
Full_Thickness	rs13029206	A	G	0.0045	0.0009	4.024e-07	22949
Full_Thickness	rs6722906	A	C	0.0045	0.0009	3.175e-07	22949
Full_Thickness	rs6753540	A	G	0.0046	0.0009	3.04e-07	22949
Full_Thickness	rs112523561	T	C	0.0045	0.0009	3.123e-07	22949
Full_Thickness	rs4552148	A	T	-0.0046	0.0009	2.385e-07	22949
Full_Thickness	rs41448746	A	G	-0.0045	0.0009	3.014e-07	22949
Full_Thickness	rs112868485	I	R	0.0047	0.0009	1.259e-07	22563
Full_Thickness	2:27081617:TTTTC	d	R	0.0055	0.0011	3.504e-07	19767
Full_Thickness	2:27081618_TTTC_T	d	R	0.0052	0.0009	3.142e-08	22563
Full_Thickness	rs12991828	A	G	-0.0043	0.0009	1.343e-06	22949
Full_Thickness	rs11887277	T	C	-0.0045	0.0009	3.06e-07	22949
Full_Thickness	rs6756245	T	C	-0.0045	0.0009	3.559e-07	22949
Full_Thickness	2:27084942_TC_T	d	R	0.0045	0.0009	7.038e-07	22563
Full_Thickness	rs13010712	A	T	0.0046	0.0009	2.457e-07	22949
Full_Thickness	rs12989446	T	G	-0.0042	0.0009	2.727e-06	22949
Full_Thickness	rs1368889	A	C	-0.0043	0.0009	1.47e-06	22949
Full_Thickness	rs827884	C	G	-0.0046	0.0009	2.258e-07	22949
Full_Thickness	rs35041270	I	R	0.0048	0.0009	3.245e-07	22563
Full_Thickness	rs12992813	A	T	0.0043	0.0009	1.859e-06	22949
Full_Thickness	rs562311	A	G	0.0045	0.0009	3.601e-07	22949
Full_Thickness	rs12615509	A	G	0.0046	0.0009	2.316e-07	22949
Full_Thickness	rs486582	T	C	-0.0048	0.0009	1.043e-07	22949
Full_Thickness	rs935018	A	T	-0.0048	0.0009	1.459e-07	22949
Full_Thickness	rs502751	T	C	0.005	0.0009	1.307e-07	22949
Full_Thickness	rs471905	A	G	-0.0049	0.0009	1.891e-07	22949
Full_Thickness	rs4665918	T	C	0.0049	0.0009	1.331e-07	22949
Full_Thickness	rs4665919	T	C	-0.0049	0.0009	1.204e-07	22949
Full_Thickness	rs527267	C	G	0.0049	0.0009	1.02e-07	22949
Full_Thickness	rs509047	T	C	-0.0042	0.0009	2.835e-06	22949
Full_Thickness	rs4665920	A	G	0.0041	0.0009	4.737e-06	22949
Full_Thickness	rs13390390	A	C	-0.0041	0.0009	4.957e-06	22949
Full_Thickness	rs7557229	T	C	-0.0041	0.0009	4.417e-06	22949
Full_Thickness	rs3910615	A	G	-0.0041	0.0009	4.615e-06	22949
Full_Thickness	rs3843322	T	G	-0.0041	0.0009	3.681e-06	22949
Full_Thickness	rs540490	A	T	-0.0041	0.0009	3.792e-06	22949
Full_Thickness	rs4665922	T	G	0.0041	0.0009	4.239e-06	22949
Full_Thickness	2:27134248_CAT_C	d	R	0.0044	0.0009	1.567e-06	22563
Full_Thickness	rs12612520	T	C	0.0041	0.0009	3.875e-06	22949
Full_Thickness	rs12618836	A	G	0.0041	0.0009	3.93e-06	22949
Full_Thickness	rs12612619	T	C	0.0041	0.0009	4.157e-06	22949
Full_Thickness	rs34803465	A	G	0.0041	0.0009	4.199e-06	22949
Full_Thickness	rs12613534	A	C	0.0041	0.0009	3.919e-06	22949
Full_Thickness	rs4665923	T	C	-0.0041	0.0009	3.956e-06	22949
Full_Thickness	rs10175737	A	C	0.0041	0.0009	3.706e-06	22949
Full_Thickness	rs877272	T	C	-0.0041	0.0009	3.147e-06	22949
Full_Thickness	rs877273	T	C	0.0041	0.0009	3.44e-06	22949
Full_Thickness	rs877274	A	C	-0.0041	0.0009	3.709e-06	22949
Full_Thickness	rs4316900	T	C	0.0041	0.0009	4.315e-06	22949
Full_Thickness	rs6706127	T	C	0.0041	0.0009	3.496e-06	22949
Full_Thickness	2:27141349_TTTC_T	d	R	0.0045	0.0009	6.711e-07	22563
Full_Thickness	rs9309558	T	C	0.0041	0.0009	3.57e-06	22949
Full_Thickness	rs9309559	A	C	-0.0041	0.0009	4.004e-06	22949
Full_Thickness	rs4441421	A	G	-0.0042	0.0009	2.307e-06	22949
Full_Thickness	rs11386753	I	R	0.0043	0.0009	2.001e-06	22563
Full_Thickness	rs35505243	I	R	-0.0099	0.002	8.346e-07	17225
Full_Thickness	rs11692435	A	G	-0.009	0.0017	1.634e-07	19205
Full_Thickness	2:98355675_CCA_C	d	R	-0.0081	0.0017	8.811e-07	21420
Full_Thickness	rs74855351	T	C	0.0079	0.0016	1.356e-06	21806
Full_Thickness	rs79170240	T	C	0.0078	0.0016	1.715e-06	21806
Full_Thickness	rs143238565	I	R	-0.0078	0.0017	2.185e-06	21420
Full_Thickness	rs17424787	A	G	-0.008	0.0017	1.408e-06	21806
Full_Thickness	rs140285472	T	C	-0.0081	0.0017	1.039e-06	21806
Full_Thickness	rs77817202	T	C	-0.0082	0.0017	2.491e-06	21806
Full_Thickness	rs11674832	A	G	0.0046	0.001	2.192e-06	22203
Full_Thickness	rs11675988	T	C	0.0046	0.001	2.687e-06	22203
Full_Thickness	rs182495554	A	G	-0.0255	0.0055	2.965e-06	16240
Full_Thickness	3:275860:GTA_G	d	R	0.0094	0.0019	5.669e-07	19996
Full_Thickness	rs1278142	T	C	0.004	0.0009	4.668e-06	22949
Full_Thickness	rs630934	A	C	-0.004	0.0009	3.376e-06	22949
Full_Thickness	rs533577	T	C	-0.004	0.0009	3.184e-06	22949
Full_Thickness	rs645567	A	G	0.004	0.0009	3.878e-06	22949
Full_Thickness	rs11708974	T	C	0.0045	0.0009	1.78e-06	22949
Full_Thickness	rs6445400	T	C	0.0043	0.0009	1.3e-06	22949
Full_Thickness	rs62247424	T	G	0.0042	0.0009	2.146e-06	22949
Full_Thickness	rs2016645	T	C	0.004	0.0009	4.561e-06	22949
Full_Thickness	rs12494222	T	C	0.004	0.0009	4.138e-06	22949
Full_Thickness	rs7615065	T	C	0.0041	0.0009	2.36e-06	22949
Full_Thickness	rs9868522	T	C	0.0041	0.0009	2.456e-06	22949
Full_Thickness	rs7611296	A	G	0.004	0.0009	4.546e-06	22949
Full_Thickness	rs9825123	T	C	-0.0041	0.0009	2.912e-06	22949
Full_Thickness	rs2888067	T	C	-0.0041	0.0009	4.382e-06	22949
Full_Thickness	rs2371526	T	G	0.0041	0.0009	4.492e-06	22949
Full_Thickness	rs6803651	T	G	0.0042	0.0009	4.563e-06	22949
Full_Thickness	3:100999790_CA_C	d	R	-0.0062	0.0013	2.666e-06	22563
Full_Thickness	4:81703838	T	G	-0.0101	0.0021	8.311e-07	19229
Full_Thickness	rs62350740	A	C	0.0062	0.0013	1.513e-06	22949
Full_Thickness	rs770310003	d	R	0.0042	0.0009	4.544e-06	22563
Full_Thickness	rs6595992	T	C	0.0048	0.001	3.004e-06	22949
Full_Thickness	rs2901009	A	G	0.0049	0.001	2.078e-06	22949
Full_Thickness	rs9327587	A	G	-0.0048	0.001	2.23e-06	22949
Full_Thickness	rs4706005	A	C	-0.0048	0.001	1.935e-06	22949
Full_Thickness	rs4146618	A	T	-0.0048	0.001	2.083e-06	22949
Full_Thickness	rs1422660	T	C	-0.0048	0.001	2.037e-06	22949
Full_Thickness	rs1422661	T	G	0.0049	0.001	1.669e-06	22949
Full_Thickness	rs13361165	A	G	-0.0048	0.001	1.683e-06	22949
Full_Thickness	rs7724066	T	C	-0.0048	0.001	2.08e-06	22949
Full_Thickness	rs1549209	A	G	-0.0049	0.0011	3.701e-06	20742
Full_Thickness	rs1549210	A	G	-0.0048	0.001	1.615e-06	22949
Full_Thickness	rs1549233	A	C	0.0049	0.001	1.481e-06	22949
Full_Thickness	rs6865988	A	G	0.0049	0.001	1.538e-06	22949
Full_Thickness	rs6595996	T	G	0.0049	0.001	1.564e-06	22949
Full_Thickness	rs10078643	T	C	-0.0048	0.001	1.632e-06	22949
Full_Thickness	rs12518537	A	G	0.0048	0.001	1.764e-06	22949
Full_Thickness	rs9327589	A	G	-0.0048	0.001	1.661e-06	22949
Full_Thickness	rs9327590	T	C	0.0048	0.001	1.67e-06	22949
Full_Thickness	rs10065950	A	G	0.0048	0.001	1.668e-06	22949
Full_Thickness	rs10051013	T	C	-0.0051	0.001	8.188e-07	22949
Full_Thickness	rs7728128	A	G	0.005	0.001	1.42e-06	22949
Full_Thickness	rs6595997	T	C	-0.0049	0.001	2.178e-06	22949
Full_Thickness	rs10477726	A	T	-0.0049	0.001	2.064e-06	22949
Full_Thickness	rs10055776	T	C	0.0053	0.0011	5.293e-07	22563
Full_Thickness	rs10063016	A	C	0.0048	0.001	1.951e-06	22949
Full_Thickness	rs75060881	T	C	-0.0049	0.0011	3.838e-06	22563
Full_Thickness	rs10036482	A	G	-0.0048	0.001	2.038e-06	22949
Full_Thickness	rs2080973	A	G	-0.0048	0.001	1.941e-06	22949
Full_Thickness	rs9327591	T	C	-0.0048	0.001	1.968e-06	22949
Full_Thickness	rs10065059	A	G	-0.0048	0.001	2.389e-06	22949
Full_Thickness	rs17168327	C	G	0.0048	0.001	2.39e-06	22949
Full_Thickness	rs2901010	A	G	0.0047	0.001	4.767e-06	22949
Full_Thickness	rs10037950	A	G	-0.0048	0.001	2.442e-06	22949
Full_Thickness	rs986624	T	C	0.0048	0.001	2.144e-06	22949
Full_Thickness	rs10070188	A	T	0.0046	0.001	4.732e-06	22949
Full_Thickness	rs10038986	A	G	0.0047	0.001	3.32e-06	22949
Full_Thickness	rs10052042	T	G	-0.0046	0.001	4.302e-06	22949
Full_Thickness	rs10036659	A	C	-0.0047	0.001	3.409e-06	22949
Full_Thickness	rs6874948	A	C	0.0047	0.001	3.162e-06	22949
Full_Thickness	rs9800001	A	G	-0.0049	0.0011	4.426e-06	22563
Full_Thickness	rs10070773	T	G	-0.0046	0.001	4.927e-06	22949
Full_Thickness	rs3857444	T	C	-0.0047	0.001	2.561e-06	22949
Full_Thickness	rs12332117	T	C	-0.0047	0.001	3.572e-06	22949
Full_Thickness	rs7448009	T	C	0.0046	0.001	4.406e-06	22949
Full_Thickness	rs3864283	T	C	0.0046	0.001	4.674e-06	22949
Full_Thickness	rs10036296	T	C	-0.0046	0.001	3.966e-06	22949
Full_Thickness	rs2278060	A	C	0.0047	0.001	3.476e-06	22949
Full_Thickness	rs2526303	A	G	-0.0043	0.0009	4.727e-06	22949
Full_Thickness	rs115192031	A	G	-0.0085	0.0017	8.017e-07	22949
Full_Thickness	rs79417906	A	G	-0.0067	0.0014	3.665e-06	22949
Full_Thickness	rs111380736	T	C	0.0112	0.0023	1.604e-06	21131
Full_Thickness	rs6465873	T	G	0.0047	0.001	3.181e-06	21707
Full_Thickness	rs79826929	T	C	0.0063	0.0012	3.639e-07	22289
Full_Thickness	rs7827623	T	G	0.0059	0.0012	5.279e-07	22397
Full_Thickness	rs28488675	T	C	0.0059	0.0012	4.349e-07	22397
Full_Thickness	rs66541755	T	C	0.0054	0.0012	2.457e-06	22949
Full_Thickness	rs11135928	A	G	0.0044	0.001	4.975e-06	22949
Full_Thickness	rs67276808	I	R	0.0047	0.001	4.125e-06	22563
Full_Thickness	rs7817028	T	G	0.0045	0.0009	8.649e-07	22589
Full_Thickness	rs7388625	A	T	-0.0041	0.0009	4.312e-06	22949
Full_Thickness	rs11991399	A	G	0.0041	0.0009	3.451e-06	22949
Full_Thickness	rs7839394	A	G	-0.0062	0.0013	4.467e-06	22949
Full_Thickness	rs12543415	A	C	0.0063	0.0013	2.871e-06	22949
Full_Thickness	rs12548910	A	G	-0.0062	0.0013	4.354e-06	22716
Full_Thickness	rs112650799	T	G	0.0062	0.0013	3.846e-06	22949
Full_Thickness	rs12541569	C	G	0.0062	0.0013	3.843e-06	22949
Full_Thickness	rs7813648	A	T	-0.0063	0.0013	3.098e-06	22949
Full_Thickness	rs17450206	A	G	-0.0057	0.0012	2.51e-06	22949
Full_Thickness	rs76455793	T	C	-0.0063	0.0013	2.434e-06	22949
Full_Thickness	rs6988341	A	G	0.0064	0.0013	1.484e-06	22949
Full_Thickness	rs7824177	A	G	0.0058	0.0012	1.591e-06	22949
Full_Thickness	rs143471598	I	R	-0.0064	0.0014	2.672e-06	22401
Full_Thickness	rs61734661	T	C	-0.0065	0.0013	1.53e-06	22787
Full_Thickness	rs7828075	T	C	-0.0064	0.0013	1.702e-06	22949
Full_Thickness	rs17450520	C	G	-0.0064	0.0013	2.168e-06	22949
Full_Thickness	8:110604669_GA_G	d	R	-0.0063	0.0014	3.958e-06	22563
Full_Thickness	rs754273734	d	R	-0.0063	0.0014	4.134e-06	22563
Full_Thickness	rs74539229	T	C	0.0064	0.0013	1.526e-06	22949
Full_Thickness	rs111861437	A	G	-0.0065	0.0014	3.005e-06	22949
Full_Thickness	rs77717811	T	C	0.0066	0.0014	2.475e-06	22949
Full_Thickness	rs76336187	T	C	0.0066	0.0014	1.783e-06	22949
Full_Thickness	rs77036455	A	G	-0.0066	0.0014	2.286e-06	22949
Full_Thickness	rs77718355	T	C	0.0066	0.0014	2.607e-06	22949
Full_Thickness	8:110672883_AAC_A	d	R	-0.007	0.0015	2.445e-06	20356
Full_Thickness	rs4579499	T	C	-0.0066	0.0014	2.463e-06	22949
Full_Thickness	rs34350865	A	G	0.0099	0.0021	3.825e-06	22757
Full_Thickness	rs73650459	A	G	-0.0057	0.0012	3.242e-06	22158
Full_Thickness	rs4752926	T	C	0.0043	0.0009	3.082e-06	22949
Full_Thickness	rs112626114	A	G	-0.0122	0.0027	4.287e-06	22972
Full_Thickness	rs3803695	A	G	-0.006	0.0013	3.269e-06	19383
Full_Thickness	rs12929363	C	G	0.0061	0.0013	4.267e-06	19075
Full_Thickness	rs147291545	T	C	0.0061	0.0013	4.506e-06	19383
Full_Thickness	rs28581494	T	C	-0.0061	0.0013	4.338e-06	19383
Full_Thickness	rs11644358	A	G	0.0061	0.0013	4.298e-06	19383
Full_Thickness	rs11645942	T	C	0.0062	0.0013	3.253e-06	19383
Full_Thickness	rs11644884	A	G	-0.0062	0.0013	3.703e-06	19383
Full_Thickness	rs34713291	T	G	-0.0063	0.0014	3.047e-06	19383
Full_Thickness	rs35779268	A	G	0.0062	0.0014	4.237e-06	19383
Full_Thickness	rs12453804	A	G	-0.0044	0.0009	4.441e-06	22949
Full_Thickness	rs12452138	A	G	0.0044	0.0009	4.133e-06	22949
Full_Thickness	rs7222434	A	C	-0.0044	0.0009	3.53e-06	22949
Full_Thickness	rs7208558	T	C	0.0044	0.0009	3.139e-06	22949
Full_Thickness	rs12602519	A	G	0.0044	0.0009	2.949e-06	22949
Full_Thickness	rs9893168	T	C	-0.0044	0.0009	1.497e-06	22949
Full_Thickness	rs9914258	T	C	0.0043	0.0009	1.721e-06	22949
Full_Thickness	rs28391220	A	C	0.0045	0.0009	8.554e-07	22949
Full_Thickness	rs11656696	A	C	0.0047	0.0009	3.11e-07	22589
Full_Thickness	rs9889528	T	C	0.0046	0.001	2.006e-06	22589
Full_Thickness	rs2316766	T	G	0.0067	0.0014	3.111e-06	16140
Full_Thickness	rs2316767	T	C	-0.0067	0.0014	3.173e-06	16140
Full_Thickness	rs2316768	T	G	0.0067	0.0014	3.174e-06	16140
Full_Thickness	17:43920219_AAAG_A	d	R	0.0061	0.0013	4.989e-06	16140
Full_Thickness	rs62079080	A	T	0.0075	0.0016	1.344e-06	19702
Full_Thickness	rs146585294	I	R	-0.0079	0.0016	5.253e-07	19316
Full_Thickness	rs62079082	T	G	-0.0072	0.0015	1.479e-06	19893
Full_Thickness	rs61740098	T	C	-0.0071	0.0015	1.641e-06	21251
Full_Thickness	rs62079085	T	C	-0.007	0.0015	2.217e-06	21251
Full_Thickness	rs62079086	T	C	0.007	0.0015	2.037e-06	21251
Full_Thickness	rs78180043	A	G	-0.0067	0.0014	3.928e-06	21251
Full_Thickness	rs71356699	A	G	-0.0065	0.0012	1.518e-07	17354
Full_Thickness	rs71356700	T	C	0.0063	0.0012	2.411e-07	17354
Full_Thickness	rs71358703	A	G	0.0063	0.0012	2.336e-07	17354
Full_Thickness	rs2847074	A	G	-0.0058	0.0012	5.804e-07	17740
Full_Thickness	rs73362370	T	C	-0.0058	0.0012	5.503e-07	17740
Full_Thickness	rs4797565	A	G	0.0057	0.0011	6.448e-07	17740
Full_Thickness	rs2212583	A	G	-0.0054	0.0011	1.768e-06	17740
Full_Thickness	rs3909689	T	C	0.0054	0.0011	9.153e-07	17740
Full_Thickness	rs112946213	C	G	0.0066	0.0014	1.234e-06	18952
Full_Thickness	rs56005815	T	C	0.0054	0.0011	2.729e-06	21714
Full_Thickness	rs12454968	A	G	0.0047	0.001	2.326e-06	22949
Full_Thickness	rs8099195	T	G	-0.0047	0.001	1.742e-06	22949
Full_Thickness	rs28555521	A	T	0.0056	0.0012	3.116e-06	22563
Full_Thickness	rs749671382	d	R	-0.0056	0.0012	4.397e-06	22563
Full_Thickness	rs11080932	T	G	-0.0055	0.0012	2.08e-06	22563
Full_Thickness	rs74500071	T	G	0.0068	0.0014	1.863e-06	20089
Full_Thickness	rs79569934	T	C	0.0067	0.0014	3.141e-06	20089
Full_Thickness	rs117826338	T	C	0.0068	0.0014	1.877e-06	20089
Full_Thickness	rs77008912	A	G	-0.0066	0.0014	4.109e-06	20089
Full_Thickness	19:42524134:TG_T	d	R	-0.0083	0.0018	2.434e-06	15902
Full_Thickness	rs34843069	A	G	-0.0113	0.0024	2.401e-06	22589
Full_Thickness	rs2071882	A	G	0.0042	0.0009	3.134e-06	22589
Full_Thickness	rs713964	T	C	0.0041	0.0009	4.519e-06	22589
