# Supplementary material for: Unveiling the influence of daily dietary patterns on brain cortical structure: insights from bidirectional Mendelian randomization
Source: Royal Society of Chemistry journal article supplement (doi:10.1039/d3fo02879h), 2023-01-01
Supplement: d3fo02879h7.xlsx [file d3fo02879h7.xlsx]

## Sheet: Regions
Supplementary Table 7.1 Detailed information of instrumental variables used in MR analyses
Cortical regions (exposure)	Food type (outcome)	SNP	Effect allele	Other allele	Exposure (Cortical regions)				Outcome (Food type)
					Beta	SE	F	P-value	Beta	SE	P-value	mr_keep
THICK_caudalanteriorcingulate	alcohol_overallfreq	rs10518920	A	C	0.0132	0.0029	20.72	4.066e-06	0.00138639	0.00363752	0.7	TRUE
		rs117174116	A	G	-0.0436	0.0085	26.31	2.944e-07	0.0163031	0.00714864	0.023	TRUE
		rs138502605	C	G	-0.0291	0.0057	26.06	3.677e-07	0.00716524	0.00628368	0.28	TRUE
		rs140220606	A	C	-0.0179	0.0039	21.07	3.59e-06	0.00560836	0.00459263	0.19	TRUE
		rs17184754	T	C	0.0281	0.0061	21.22	4.804e-06	-0.00439126	0.00605805	0.43	TRUE
		rs2060060	A	G	-0.0082	0.0018	20.75	3.497e-06	0.00146632	0.00209481	0.49	TRUE
		rs722395	T	C	-0.0087	0.0018	23.36	2.476e-06	0.00257164	0.00215121	0.24	TRUE
		rs73528979	A	G	0.012	0.0025	23.04	1.925e-06	0.0015004	0.00299064	0.63	TRUE
		rs77863985	T	G	0.0518	0.0103	25.29	4.811e-07	-0.0138476	0.00749579	0.062	TRUE
		rs9929528	T	G	0.0175	0.0034	26.49	1.941e-07	-0.00138375	0.00210986	0.52	TRUE
THICK_parsorbitalis	alcohol_overallfreq	rs10275666	T	C	0.0096	0.002	23.04	1.953e-06	-0.0015331	0.00316391	0.66	TRUE
		rs10871753	T	G	-0.0065	0.0014	21.56	2.581e-06	0.00135321	0.00209402	0.53	TRUE
		rs113846260	A	C	-0.0315	0.0065	23.49	1.144e-06	-0.00187273	0.00685255	0.84	TRUE
		rs116865485	A	G	-0.017	0.0037	21.11	3.503e-06	-0.00344785	0.00506514	0.49	TRUE
		rs11914798	C	G	-0.0165	0.0034	23.55	1.486e-06	0.00206162	0.00526251	0.61	TRUE
		rs146263754	C	G	-0.0107	0.0023	21.64	4.667e-06	-0.00317309	0.00349854	0.35	TRUE
		rs147424290	C	G	-0.051	0.011	21.5	3.781e-06	-0.0112869	0.0102972	0.32	TRUE
		rs3928516	T	G	0.0132	0.0028	22.22	2.933e-06	0.00163749	0.00255827	0.44	TRUE
		rs4785955	T	G	-0.0084	0.0017	24.42	6.389e-07	-0.00438923	0.00257733	0.092	TRUE
		rs4810349	T	C	0.0068	0.0014	23.59	4.91e-07	-0.000338569	0.00209895	0.85	TRUE
		rs76881621	T	C	-0.0192	0.0042	20.9	4.777e-06	-0.00671417	0.00583169	0.24	TRUE
		rs7930227	A	G	-0.0068	0.0014	23.59	2.065e-06	-0.00119519	0.00218736	0.61	TRUE
THICK_lingual	anyalcohol_glassespermonth	rs10495963	T	C	0.0052	0.0009	33.38	3.326e-08	-0.00107477	0.00231629	0.66	TRUE
		rs117904105	T	C	0.0067	0.0014	22.9	1.508e-06	-0.00101132	0.00315319	0.72	TRUE
		rs137592	A	G	0.0046	0.001	21.16	4.258e-06	0.000587747	0.00221318	0.81	TRUE
		rs150138349	A	G	0.0165	0.0034	23.55	1.491e-06	0.0171089	0.00741292	0.017	TRUE
		rs1897443	T	C	0.004	0.0008	25	1.79e-06	0.000374962	0.00209778	0.88	TRUE
		rs2959101	T	C	0.0042	0.0009	21.78	1.119e-06	0.0040339	0.00210749	0.054	TRUE
		rs4551987	A	G	-0.0052	0.0011	22.35	4.182e-06	0.00594705	0.00288126	0.036	TRUE
		rs6419469	A	G	-0.0045	0.001	20.25	3.196e-06	-0.00316234	0.00226831	0.16	TRUE
		rs72956862	A	C	0.0047	0.001	22.09	4.834e-06	0.00140586	0.00249835	0.62	TRUE
		rs7755785	T	C	0.0065	0.0014	21.56	3.157e-06	0.00588143	0.00359849	0.11	TRUE
		rs80128872	C	G	-0.0185	0.0033	31.43	2.228e-08	-0.0029565	0.00705992	0.64	TRUE
		rs8061538	C	G	-0.0046	0.001	21.16	1.54e-06	-0.00241782	0.00226529	0.29	TRUE
		rs9537916	A	G	0.0045	0.0008	31.64	5.733e-08	0.00777944	0.00215385	0.00028	TRUE
		rs9674806	T	C	0.0097	0.0021	21.34	3.888e-06	0.000368905	0.00450797	0.91	TRUE
SA_caudalanteriorcingulate	beef_overallfreq	rs11160016	A	G	6.0347	1.2297	24.08	9.231e-07	0.00586565	0.00243861	0.016	TRUE
		rs117508323	C	G	19.5098	3.9662	24.2	8.699e-07	0.00453541	0.00693493	0.52	TRUE
		rs12096763	A	C	10.2037	1.9854	26.41	2.758e-07	0.00445527	0.00525599	0.41	TRUE
		rs12472555	T	G	-4.2774	0.8858	23.32	1.375e-06	-0.00450878	0.00211158	0.032	TRUE
		rs1575863	A	G	4.9848	0.8939	31.1	2.455e-08	0.00380221	0.00213647	0.075	TRUE
		rs1677902	T	C	6.412	1.3909	21.25	4.025e-06	0.00194857	0.00323808	0.57	TRUE
		rs2326254	T	C	-4.3177	0.9328	21.43	3.678e-06	0.00261641	0.00221861	0.23	TRUE
		rs2509765	T	C	6.9868	1.2826	29.67	5.108e-08	0.0031392	0.00292174	0.29	TRUE
		rs309596	T	C	-5.8094	1.0808	28.89	7.645e-08	-0.00519684	0.0026283	0.047	TRUE
		rs61838920	A	G	-5.2661	1.1441	21.19	4.168e-06	-0.00044152	0.00271847	0.88	TRUE
		rs6675870	T	C	-6.0229	1.254	23.07	1.563e-06	0.000445904	0.00301475	0.86	TRUE
		rs720233	T	G	-4.8096	1.0276	21.91	2.862e-06	-0.00376114	0.00251228	0.13	TRUE
		rs72825244	A	C	5.3713	1.1749	20.9	4.837e-06	0.00539584	0.00270009	0.045	TRUE
		rs7302836	A	G	4.2812	0.9265	21.35	3.817e-06	0.000572838	0.00210975	0.76	TRUE
		rs75761779	T	G	-12.8938	2.8079	21.09	4.39e-06	0.00759375	0.0066989	0.26	TRUE
SA_lingual	beef_overallfreq	rs1014444	A	G	13.4806	2.7571	23.91	1.011e-06	0.00594371	0.00224937	0.0085	TRUE
		rs10237280	T	C	16.7557	2.7866	36.16	1.822e-09	0.000247331	0.00219809	0.9	TRUE
		rs112197170	A	G	32.6133	6.984	21.81	3.016e-06	-0.000732282	0.00364526	0.83	TRUE
		rs113336697	T	C	-27.5798	5.6773	23.6	1.186e-06	-0.00197511	0.00369016	0.6	TRUE
		rs114972581	T	C	-57.8097	12.643	20.91	4.82e-06	9.95653e-05	0.00601957	1	TRUE
		rs12136078	T	C	14.4727	3.1134	21.61	3.342e-06	0.00480179	0.00249292	0.055	TRUE
		rs12508031	A	T	-21.6379	4.4931	23.19	1.466e-06	-0.000368542	0.00229815	0.88	TRUE
		rs13038914	T	C	15.4848	2.7831	30.96	2.639e-08	-0.00108427	0.00219252	0.62	TRUE
		rs1327864	C	G	-14.4793	2.7861	27.01	2.025e-07	-0.00460345	0.00220527	0.036	TRUE
		rs1341823	A	G	-17.2462	3.7414	21.25	4.036e-06	-0.0008566	0.00289607	0.79	TRUE
		rs16864372	A	G	-25.0591	5.3893	21.62	3.323e-06	0.00586274	0.00428594	0.17	TRUE
		rs1934057	T	C	-16.8361	2.7846	36.56	1.484e-09	-0.00159982	0.00212468	0.43	TRUE
		rs2219320	T	C	-14.3996	3.1215	21.28	3.968e-06	-0.00792235	0.00241204	0.001	TRUE
		rs2485460	A	T	17.2677	3.727	21.47	3.601e-06	-0.00140918	0.00285994	0.63	TRUE
		rs2520269	T	C	-13.6294	2.9429	21.45	3.636e-06	0.00604048	0.00232086	0.0091	TRUE
		rs2693833	A	G	12.3871	2.6546	21.77	3.067e-06	-0.000356479	0.00212171	0.86	TRUE
		rs28412122	A	G	-18.7645	3.2261	33.83	6.011e-09	0.00375585	0.00253734	0.14	TRUE
		rs34092336	A	G	-23.2161	4.705	24.35	8.04e-07	-0.00364161	0.00280888	0.2	TRUE
		rs34622	A	G	14.3923	3.1151	21.35	3.833e-06	-0.00399383	0.00240177	0.092	TRUE
		rs34721481	A	T	-17.0515	3.0292	31.69	1.812e-08	-0.000640839	0.00232419	0.77	TRUE
		rs3818188	A	G	22.6817	4.3059	27.75	1.382e-07	0.0058597	0.00276487	0.034	TRUE
		rs453555	T	C	34.5885	7.3429	22.19	2.471e-06	-0.00388061	0.00522735	0.43	TRUE
		rs4663692	T	C	-18.9924	4.0267	22.25	2.398e-06	-0.0036841	0.00300227	0.21	TRUE
		rs61508189	A	C	16.8717	2.8755	34.43	4.427e-09	0.00261119	0.00210236	0.21	TRUE
		rs61941461	T	C	15.2908	3.1583	23.44	1.289e-06	0.00328279	0.00236367	0.16	TRUE
		rs6603991	T	C	17.1338	3.3813	25.68	4.036e-07	0.00114175	0.00257971	0.64	TRUE
		rs6808509	A	C	12.3123	2.6614	21.4	3.723e-06	0.00203526	0.0021018	0.32	TRUE
		rs73313052	A	G	-28.9284	4.0232	51.7	6.458e-13	0.00217408	0.00320418	0.47	TRUE
		rs73866285	T	C	37.8429	8.0358	22.18	2.486e-06	0.00688148	0.00571325	0.22	TRUE
		rs76478992	A	G	-45.2582	9.5235	22.58	2.011e-06	-0.0122093	0.00552494	0.027	TRUE
		rs77411063	T	C	-20.0126	4.3078	21.58	3.389e-06	-0.0046702	0.00338099	0.17	TRUE
		rs7914158	T	C	15.3406	2.8026	29.96	4.407e-08	-0.00233536	0.00218276	0.28	TRUE
		rs7930532	A	G	-19.3514	3.0582	40.04	2.489e-10	-0.000586319	0.00225871	0.78	TRUE
		rs7936831	A	T	-90.6527	19.5966	21.4	3.729e-06	-0.0116186	0.0109891	0.29	TRUE
		rs7973779	A	G	18.7638	4.0453	21.51	3.512e-06	0.00534203	0.00334324	0.11	TRUE
		rs910697	A	G	15.966	2.7419	33.91	5.78e-09	-0.00294194	0.00210902	0.15	TRUE
		rs9545145	A	G	-12.5972	2.6678	22.3	2.336e-06	-0.00308607	0.002101	0.15	TRUE
		rs9741870	A	G	35.4909	7.6571	21.48	3.569e-06	-0.0032866	0.00476893	0.5	TRUE
		rs983741	A	C	-18.6634	3.1447	35.22	2.942e-09	-0.00210931	0.00249111	0.41	TRUE
THICK_postcentral	beef_overallfreq	rs10402696	T	C	0.0078	0.0017	21.05	4.336e-06	0.00170395	0.00445913	0.72	TRUE
		rs10498193	A	G	-0.0079	0.0015	27.74	2.002e-07	0.00287868	0.00400038	0.49	TRUE
		rs111353521	T	C	-0.0039	0.0008	23.77	4.053e-06	0.00103551	0.00211034	0.61	TRUE
		rs11634241	A	G	-0.0046	0.0008	33.06	1.874e-08	0.00127717	0.0022028	0.53	TRUE
		rs11664265	T	C	-0.0058	0.0012	23.36	2.347e-06	0.00467649	0.00336736	0.17	TRUE
		rs11771668	A	G	0.0047	0.0008	34.52	1.353e-08	-0.00131338	0.00219497	0.52	TRUE
		rs12807821	T	G	0.0115	0.0025	21.16	3.569e-06	-0.00597573	0.00459028	0.2	TRUE
		rs13203267	A	T	0.0114	0.0025	20.79	3.89e-06	-0.0013859	0.00552804	0.8	TRUE
		rs17822045	T	C	0.0057	0.0009	40.11	3.079e-11	-0.00395547	0.00232706	0.092	TRUE
		rs2093620	A	C	0.0038	0.0008	22.56	1.666e-06	0.00220515	0.00210518	0.31	TRUE
		rs228786	A	G	0.0069	0.0015	21.16	4.411e-06	7.19268e-05	0.00402686	0.99	TRUE
		rs2403193	T	C	0.0045	0.0009	25	1.284e-07	-0.00660074	0.00223363	0.0033	TRUE
		rs2489012	A	G	0.0042	0.0008	27.56	3.266e-07	0.00358945	0.00213414	0.089	TRUE
		rs2802525	A	G	0.0053	0.001	28.09	1.62e-07	-0.00112907	0.00270299	0.7	TRUE
		rs34772625	T	C	-0.0087	0.0019	20.97	4.71e-06	0.00771247	0.00505499	0.14	TRUE
		rs3736591	A	G	-0.0038	0.0008	22.56	2.183e-06	0.000339763	0.00213278	0.88	TRUE
		rs4924345	A	C	-0.0254	0.0015	286.74	1.904e-68	0.00275097	0.00385425	0.47	TRUE
		rs62019481	A	G	-0.0065	0.0013	25	8.881e-07	0.00462304	0.00335677	0.16	TRUE
		rs62521928	A	G	0.0099	0.0021	22.22	2.703e-06	0.000776332	0.00461022	0.86	TRUE
		rs6686188	A	G	0.0043	0.0009	22.83	3.452e-06	-0.00551574	0.00248761	0.025	TRUE
		rs7314728	C	G	-0.0044	0.001	19.36	4.032e-06	0.00369481	0.00223701	0.092	TRUE
		rs7716895	T	G	0.005	0.0011	20.66	3.235e-06	0.00114984	0.00291674	0.66	TRUE
		rs7752422	A	C	-0.004	0.0009	19.75	3.137e-06	0.000910999	0.00215345	0.69	TRUE
		rs880424	A	G	0.0049	0.001	24.01	4.152e-07	0.0063454	0.00262327	0.016	TRUE
SA_insula	cereal_bowlsperweek	rs10798780	A	G	-7.4184	1.5577	22.68	1.912e-06	-0.00443621	0.00211447	0.033	TRUE
		rs10888796	T	C	9.8351	1.8948	26.94	2.096e-07	0.00406539	0.00249984	0.1	TRUE
		rs114035640	T	C	-25.381	5.4046	22.05	2.651e-06	-0.00130867	0.00735328	0.84	TRUE
		rs12304222	C	G	7.9016	1.6853	21.98	2.75e-06	0.00429706	0.00222561	0.045	TRUE
		rs145394106	A	G	-21.6675	4.5988	22.2	2.458e-06	-0.0033314	0.00625699	0.58	TRUE
		rs2268438	A	G	-7.8411	1.6549	22.45	2.158e-06	0.00504671	0.00226505	0.03	TRUE
		rs243045	A	G	7.9876	1.6836	22.51	2.092e-06	-0.00191035	0.0022424	0.39	TRUE
		rs28583226	A	G	-7.4397	1.5624	22.67	1.92e-06	-0.00932117	0.00210852	8.4e-06	TRUE
		rs309596	T	C	10.476	1.8985	30.45	3.428e-08	0.00415656	0.00262205	0.13	TRUE
		rs36144266	A	G	8.8592	1.8898	21.98	2.758e-06	0.0036419	0.00246435	0.14	TRUE
		rs4265197	T	C	7.3357	1.5537	22.29	2.342e-06	-0.00409251	0.00211072	0.051	TRUE
		rs4291964	A	G	-9.4649	1.582	35.79	2.191e-09	-0.00370961	0.00210809	0.078	TRUE
		rs4295271	T	C	21.9172	4.6934	21.81	3.015e-06	0.00318151	0.00523412	0.54	TRUE
		rs4768701	A	G	-8.4886	1.753	23.45	1.283e-06	2.39958e-05	0.00217138	0.95	TRUE
		rs55787425	A	T	7.5629	1.6165	21.89	2.89e-06	0.000697273	0.00215613	0.78	TRUE
		rs58066679	A	G	14.1695	2.9933	22.41	2.204e-06	0.00666248	0.00381843	0.082	TRUE
		rs61779314	T	C	-9.3464	2.0211	21.39	3.757e-06	-0.00366213	0.00269901	0.18	TRUE
		rs6467287	A	G	-7.8109	1.5644	24.93	5.947e-07	-0.00198611	0.00210652	0.35	TRUE
		rs6739199	T	C	8.6708	1.7309	25.09	5.46e-07	-0.00552999	0.00232889	0.019	TRUE
		rs6926494	T	C	30.4249	6.2122	23.99	9.702e-07	-0.0106068	0.00853136	0.25	TRUE
		rs6988493	T	C	-7.1827	1.5716	20.89	4.867e-06	-0.0048162	0.00211673	0.023	TRUE
		rs72801662	A	G	-49.5307	10.6055	21.81	3.008e-06	0.00180588	0.00850855	0.85	TRUE
		rs73551565	T	C	-8.5549	1.8561	21.24	4.045e-06	-0.000974227	0.00244828	0.7	TRUE
		rs74355340	T	C	13.7584	2.8225	23.76	1.091e-06	0.004399	0.00386831	0.25	TRUE
		rs757368	C	G	11.9236	2.5095	22.58	2.02e-06	0.00292906	0.0033019	0.36	TRUE
		rs77341180	A	G	-44.4427	9.4717	22.02	2.703e-06	-0.00785065	0.00824474	0.33	TRUE
		rs9375452	T	C	10.2244	1.8985	29	7.226e-08	-0.00136018	0.00250612	0.6	TRUE
		rs9457882	T	C	-17.4359	3.8058	20.99	4.618e-06	-0.00424864	0.00515115	0.42	TRUE
		rs9514978	A	G	-7.2141	1.571	21.09	4.391e-06	-0.000612848	0.00211097	0.73	TRUE
SA_rostralmiddlefrontal	cereal_bowlsperweek	rs10053484	T	C	25.4632	4.1728	37.24	1.047e-09	-6.52404e-05	0.00235857	0.98	TRUE
		rs10139160	T	C	18.0581	3.7703	22.94	1.671e-06	0.00203379	0.00210653	0.36	TRUE
		rs10139287	A	C	-18.0914	3.8349	22.26	2.387e-06	-0.00312702	0.00217164	0.15	TRUE
		rs10750766	A	C	24.9726	4.1145	36.84	1.284e-09	0.000908159	0.00231555	0.65	TRUE
		rs11580768	T	C	-20.2324	4.1871	23.35	1.351e-06	0.00295162	0.00212024	0.16	TRUE
		rs11634461	T	C	-39.3504	8.4382	21.75	3.111e-06	-0.0164931	0.0046507	0.00035	TRUE
		rs1165645	A	G	21.0012	3.9948	27.64	1.463e-07	0.00393015	0.00213416	0.063	TRUE
		rs117956519	A	G	121.107	25.5874	22.4	2.211e-06	0.00321885	0.00873158	0.73	TRUE
		rs11885014	A	G	-19.7109	4.1629	22.42	2.192e-06	0.0027086	0.00236089	0.25	TRUE
		rs12198419	A	T	-18.4295	3.9967	21.26	4.003e-06	-0.00244026	0.00227237	0.3	TRUE
		rs12403161	A	G	-21.2864	4.3226	24.25	8.461e-07	0.00202209	0.00237266	0.41	TRUE
		rs13198298	T	C	-29.7367	6.3896	21.66	3.257e-06	-0.000321585	0.00364223	0.86	TRUE
		rs1440802	T	C	31.6617	6.648	22.68	1.912e-06	0.00529548	0.00363199	0.14	TRUE
		rs145019618	A	G	-106.587	22.277	22.89	1.713e-06	0.0172256	0.0123303	0.16	TRUE
		rs149990818	T	C	167.382	32.637	26.3	2.919e-07	0.00369206	0.0102814	0.74	TRUE
		rs2279829	T	C	23.0514	4.546	25.71	3.963e-07	0.00932517	0.00255648	0.00022	TRUE
		rs2478219	T	C	-21.4069	4.6399	21.29	3.956e-06	-0.0019607	0.00259183	0.44	TRUE
		rs35612915	A	G	-26.6637	4.4536	35.84	2.138e-09	-0.00206908	0.00246661	0.42	TRUE
		rs4509205	T	C	-20.1232	3.8918	26.74	2.333e-07	-0.00126951	0.00220464	0.56	TRUE
		rs4656379	A	G	29.0667	6.3322	21.07	4.427e-06	0.00605138	0.00356292	0.11	TRUE
		rs4676588	T	C	19.0463	4.116	21.41	3.703e-06	-0.000309919	0.00234776	0.88	TRUE
		rs4772268	A	G	-20.9104	4.003	27.29	1.754e-07	0.00336558	0.00226223	0.14	TRUE
		rs6134521	A	C	28.1237	5.8794	22.88	1.723e-06	-0.00133711	0.00275331	0.6	TRUE
		rs6572074	A	T	22.999	4.9783	21.34	3.84e-06	0.00223368	0.00235215	0.34	TRUE
		rs6709302	A	G	-19.4572	4.133	22.16	2.505e-06	0.000302578	0.00223231	0.85	TRUE
		rs674369	A	G	-17.7444	3.7171	22.79	1.809e-06	-0.00156898	0.00209841	0.45	TRUE
		rs6830285	T	C	29.9955	5.9188	25.68	4.024e-07	-0.00317113	0.00351693	0.35	TRUE
		rs7529537	T	C	35.0762	6.423	29.82	4.733e-08	0.00374623	0.00323818	0.24	TRUE
		rs823114	A	G	19.1663	3.7295	26.41	2.761e-07	0.00174975	0.00210432	0.45	TRUE
		rs9367415	A	C	19.7768	3.9299	25.32	4.843e-07	0.0145586	0.00219404	2.7e-11	TRUE
THICK_parahippocampal	cheese_overallfreq	rs111807453	C	G	0.0934	0.0202	21.38	3.672e-06	-0.0166717	0.0119031	0.17	TRUE
		rs117373084	A	G	-0.0403	0.008	25.38	4.948e-07	0.00959335	0.00461539	0.037	TRUE
		rs12126372	T	C	0.0315	0.0067	22.1	2.844e-06	-0.00324947	0.00561424	0.59	TRUE
		rs12307554	T	G	0.0172	0.0037	21.61	4.748e-06	-0.0104325	0.00324048	0.0012	TRUE
		rs1281137	A	G	0.0116	0.0026	19.91	4.956e-06	-0.00128476	0.00221957	0.59	TRUE
		rs1420466	T	G	0.0124	0.0025	24.6	8.228e-07	0.00150497	0.00227478	0.52	TRUE
		rs1557698	A	G	0.0109	0.0024	20.63	4.485e-06	0.00338678	0.00214098	0.11	TRUE
		rs17265639	A	C	-0.0242	0.0049	24.39	6.886e-07	-0.000640542	0.00405795	0.89	TRUE
		rs187801941	T	C	0.0576	0.0121	22.66	2.009e-06	-0.000728167	0.0083958	0.92	TRUE
		rs206515	T	G	-0.0125	0.0025	25	3.177e-07	0.000569436	0.00221453	0.83	TRUE
		rs2087133	A	G	-0.0126	0.0028	20.25	4.867e-06	0.00306305	0.00243895	0.21	TRUE
		rs224690	T	C	-0.0137	0.0027	25.75	4.108e-07	0.000738298	0.00239636	0.77	TRUE
		rs28701981	T	C	0.0151	0.0026	33.73	3.477e-09	-0.00791176	0.00221796	0.00034	TRUE
		rs352359	C	G	-0.0128	0.0027	22.47	2.994e-06	-0.00424847	0.00221856	0.056	TRUE
		rs444366	T	C	-0.011	0.0024	21.01	2.796e-06	0.00460143	0.00217817	0.035	TRUE
		rs57074124	T	C	0.019	0.0041	21.48	3.213e-06	-0.0051883	0.00368519	0.15	TRUE
		rs6077870	A	G	-0.0139	0.003	21.47	3.159e-06	-0.00101646	0.0024969	0.69	TRUE
		rs62348885	A	G	-0.016	0.0033	23.51	1.048e-06	0.00554345	0.00288481	0.055	TRUE
		rs6782307	T	C	-0.0138	0.003	21.16	4.22e-06	0.00500614	0.00279414	0.078	TRUE
		rs704292	T	C	0.0148	0.0032	21.39	4.953e-06	-0.0069899	0.00295625	0.019	TRUE
		rs72797311	T	G	-0.0297	0.0065	20.88	4.141e-06	0.00099775	0.00526714	0.85	TRUE
		rs731365	T	G	-0.0112	0.0024	21.78	4.034e-06	-0.000682375	0.0021496	0.73	TRUE
		rs7638351	A	G	0.0149	0.0032	21.68	3.207e-06	0.000103829	0.00260637	0.99	TRUE
		rs76964294	T	C	-0.0269	0.0054	24.82	6.727e-07	0.000114697	0.00415281	0.98	TRUE
		rs7697946	T	C	-0.0125	0.0025	25	4.16e-07	-0.0042851	0.00225379	0.056	TRUE
		rs79420987	C	G	-0.0453	0.0099	20.94	4.993e-06	-0.00695152	0.00556666	0.21	TRUE
THICK_superiortemporal	cheese_overallfreq	rs111063735	A	G	0.0043	0.0009	22.83	4.372e-06	-0.00110367	0.00211178	0.61	TRUE
		rs149379399	C	G	-0.0105	0.0022	22.78	1.715e-06	0.000759024	0.00444466	0.87	TRUE
		rs189171241	T	G	0.0388	0.0084	21.34	3.285e-06	-0.00118182	0.0117206	0.9	TRUE
		rs191280299	A	T	0.006	0.0012	25	1.283e-06	0.00124148	0.00259268	0.65	TRUE
		rs2003067	T	C	-0.0089	0.0019	21.94	4.95e-06	0.0124308	0.00446632	0.0055	TRUE
		rs4688759	T	C	0.0089	0.0016	30.94	1.661e-08	-0.00774667	0.00472175	0.11	TRUE
		rs61784835	T	C	-0.0063	0.0011	32.8	3.48e-08	-0.000472427	0.00220617	0.82	TRUE
		rs7593003	A	G	-0.0044	0.0009	23.9	2.47e-06	0.000656786	0.00213391	0.76	TRUE
		rs7621573	T	C	0.0049	0.001	24.01	3.095e-07	-0.00590386	0.00215531	0.0062	TRUE
		rs79818178	A	G	0.0195	0.0038	26.33	3.689e-07	-0.000890688	0.00959525	0.94	TRUE
		rs80137470	A	G	0.0119	0.0026	20.95	3.386e-06	-0.00858134	0.00535674	0.11	TRUE
SA_parstriangularis	coffee_cupsperday	rs10278627	A	G	-14.2121	1.6167	77.28	1.484e-18	-0.00239813	0.00226778	0.3	TRUE
		rs1080066	A	G	17.0355	2.6972	39.89	2.685e-10	-0.00419611	0.00365791	0.25	TRUE
		rs112593021	T	C	-8.868	1.9062	21.64	3.285e-06	-0.00141993	0.00268848	0.6	TRUE
		rs114640614	A	G	39.4557	8.5241	21.43	3.679e-06	-0.00142208	0.00861198	0.89	TRUE
		rs12699999	A	G	7.7959	1.5636	24.86	6.171e-07	0.00209762	0.00219337	0.38	TRUE
		rs13174854	A	G	-8.2524	1.5761	27.42	1.641e-07	3.06253e-05	0.00211828	0.97	TRUE
		rs139156689	T	C	-42.0324	9.159	21.06	4.449e-06	-0.00745499	0.00985458	0.45	TRUE
		rs180901614	A	G	-40.8304	8.8459	21.31	3.917e-06	0.00177658	0.0124957	0.93	TRUE
		rs187363957	T	C	-16.4708	3.2893	25.07	5.517e-07	-0.000400123	0.00424872	0.83	TRUE
		rs2216964	T	C	7.9793	1.6057	24.69	6.716e-07	-0.000926186	0.00225181	0.66	TRUE
		rs2279829	T	C	19.8196	1.8263	117.77	1.941e-27	-0.0054466	0.00255801	0.036	TRUE
		rs2287283	T	C	8.2445	1.5682	27.64	1.462e-07	-0.000394313	0.00214696	0.82	TRUE
		rs2729046	A	G	9.8642	2.1116	21.82	2.992e-06	-0.000719148	0.00212682	0.76	TRUE
		rs2881811	T	C	-7.9631	1.7437	20.86	4.952e-06	0.00162307	0.00231327	0.47	TRUE
		rs4076533	T	C	-6.9833	1.5226	21.04	4.507e-06	0.0011046	0.00210418	0.58	TRUE
		rs4445492	A	T	-7.9781	1.6772	22.63	1.967e-06	0.00497427	0.00229153	0.034	TRUE
		rs55818129	T	G	-14.3639	2.6487	29.41	5.863e-08	0.00661834	0.00327838	0.042	TRUE
		rs56078743	A	G	8.7318	1.7938	23.7	1.129e-06	0.000456481	0.00224673	0.84	TRUE
		rs573335	C	G	-17.3867	3.7726	21.24	4.051e-06	0.00752118	0.00347915	0.025	TRUE
		rs6748469	A	G	-7.1646	1.5467	21.46	3.617e-06	0.00324786	0.00214635	0.13	TRUE
		rs72943724	A	G	22.6173	4.9469	20.9	4.831e-06	-0.00408082	0.00526405	0.47	TRUE
		rs77836234	T	G	18.6432	3.7833	24.28	8.32e-07	-0.0034049	0.00428999	0.41	TRUE
		rs7996803	T	C	-8.3714	1.6934	24.44	7.676e-07	0.00131088	0.00235779	0.58	TRUE
		rs8005394	C	G	10.339	2.2539	21.04	4.493e-06	0.00506754	0.00319575	0.099	TRUE
		rs80221693	T	C	25.5636	4.97	26.46	2.695e-07	0.00910989	0.00614596	0.13	TRUE
		rs80251886	A	T	19.6615	4.0208	23.91	1.009e-06	-0.00321017	0.00505925	0.51	TRUE
		rs8132524	T	C	-7.9677	1.6716	22.72	1.875e-06	0.000600924	0.00229477	0.85	TRUE
SA_posteriorcingulate	coffee_cupsperday	rs10507278	C	G	6.7963	1.3861	24.04	9.424e-07	-0.00447596	0.00298217	0.13	TRUE
		rs10788109	A	G	6.088	1.2521	23.64	1.161e-06	-0.00315386	0.00210743	0.15	TRUE
		rs11161942	T	C	8.498	1.5317	30.78	2.889e-08	-0.005453	0.00310606	0.079	TRUE
		rs11598186	A	G	-5.1084	1.119	20.84	4.992e-06	0.00345634	0.00229055	0.13	TRUE
		rs116655825	A	G	12.6925	2.4853	26.08	3.273e-07	-0.00272452	0.00504695	0.63	TRUE
		rs12500639	T	C	11.1357	2.3252	22.94	1.674e-06	-0.011648	0.00486513	0.021	TRUE
		rs12764880	T	C	-4.7729	1.0219	21.81	3.003e-06	-0.00290849	0.00211917	0.17	TRUE
		rs13071264	T	C	-5.2041	1.1346	21.04	4.498e-06	-0.0026548	0.00227013	0.25	TRUE
		rs203026	A	G	9.586	2.0323	22.25	2.396e-06	0.00361072	0.0043748	0.36	TRUE
		rs2110944	T	C	5.19	1.0361	25.09	5.47e-07	-0.00828588	0.0021082	7.3e-05	TRUE
		rs2235704	T	C	7.5886	1.6377	21.47	3.593e-06	-0.00211069	0.00357761	0.54	TRUE
		rs2709085	T	C	-6.274	1.3302	22.25	2.401e-06	0.00332005	0.00272485	0.22	TRUE
		rs34107459	T	C	8.5736	1.8118	22.39	2.222e-06	-0.0052016	0.00343224	0.13	TRUE
		rs459506	C	G	-19.8432	4.2441	21.86	2.933e-06	-0.00222011	0.00869093	0.79	TRUE
		rs4957375	T	C	5.9447	1.2435	22.85	1.749e-06	-0.0018663	0.00256852	0.49	TRUE
		rs61894520	T	C	8.2376	1.7552	22.03	2.69e-06	-0.00106046	0.00337571	0.68	TRUE
		rs62015774	A	G	-9.9602	2.1449	21.56	3.423e-06	0.00137371	0.00399579	0.75	TRUE
		rs6438404	T	C	7.5972	1.6523	21.14	4.269e-06	-0.00112208	0.0033946	0.77	TRUE
		rs77505740	A	G	7.023	1.4659	22.95	1.659e-06	0.00301636	0.00263041	0.22	TRUE
		rs77667547	A	G	15.7641	3.3248	22.48	2.123e-06	-0.00475665	0.00537637	0.41	TRUE
		rs77935092	T	C	16.2217	3.1308	26.85	2.202e-07	-0.00756859	0.00681309	0.27	TRUE
		rs7973557	A	G	-5.4608	1.1349	23.15	1.496e-06	0.00177028	0.00227913	0.46	TRUE
		rs8011815	A	G	5.5434	1.211	20.95	4.707e-06	-0.0015154	0.00225502	0.5	TRUE
		rs892865	A	G	5.0152	1.0126	24.53	7.316e-07	0.00109107	0.00209931	0.62	TRUE
THICK_lateraloccipital	coffee_cupsperday	rs11144028	T	C	0.0055	0.001	30.25	7.287e-08	-0.0016329	0.00270358	0.54	TRUE
		rs111883187	A	G	0.0199	0.004	24.75	4.572e-07	0.0013915	0.00809085	0.84	TRUE
		rs111941366	T	C	-0.0058	0.0012	23.36	1.762e-06	0.00605203	0.002103	0.0028	TRUE
		rs116392573	T	C	0.0085	0.0018	22.3	4.206e-06	-0.00705732	0.00451051	0.12	TRUE
		rs12953229	A	G	0.0045	0.0009	25	8.732e-07	0.00118764	0.00218348	0.55	TRUE
		rs34235624	A	G	-0.0062	0.0012	26.69	4.506e-07	0.00707746	0.00319361	0.025	TRUE
		rs4843227	T	C	0.0038	0.0008	22.56	4.149e-06	-4.92826e-06	0.0021658	0.92	TRUE
		rs7157918	A	G	0.0043	0.0009	22.83	1.756e-06	-0.00313352	0.00239879	0.18	TRUE
		rs72731757	A	T	0.0087	0.0016	29.57	4.834e-08	-0.00307072	0.00425664	0.47	TRUE
		rs72829474	T	C	-0.011	0.0023	22.87	1.719e-06	0.00666723	0.0053304	0.21	TRUE
		rs79074513	A	G	0.0194	0.0042	21.34	3.495e-06	-0.00667938	0.00806846	0.4	TRUE
		rs79224232	T	C	-0.0165	0.0036	21.01	4.787e-06	0.00752747	0.00601369	0.21	TRUE
		rs979998	C	G	-0.0041	0.0009	20.75	3.621e-06	0.00270183	0.00233526	0.26	TRUE
THICK_lateralorbitofrontal	coffee_cupsperday	rs11734140	A	G	0.0053	0.0011	23.21	7.774e-07	-0.00195596	0.00212578	0.33	TRUE
		rs185561823	A	G	-0.0428	0.0085	25.35	5.482e-07	0.00830778	0.00959917	0.35	TRUE
		rs4318042	A	G	0.0052	0.0011	22.35	4.733e-06	-0.00227872	0.00213487	0.29	TRUE
		rs4890925	C	G	-0.0153	0.0033	21.5	4.191e-06	0.0101482	0.00496973	0.039	TRUE
		rs62177670	T	G	-0.0059	0.0013	20.6	4.387e-06	-0.000113189	0.00244272	0.93	TRUE
		rs7036912	C	G	-0.0192	0.0041	21.93	3.632e-06	0.00486299	0.00823863	0.54	TRUE
		rs7869525	A	C	0.0053	0.0011	23.21	2.399e-06	-0.00070113	0.00211239	0.76	TRUE
SA_frontalpole	cookedveg_TBSperday	rs10406632	T	C	1.7	0.3533	23.15	1.501e-06	-0.000831191	0.0024357	0.72	TRUE
		rs113050298	T	C	-3.0819	0.6493	22.53	2.067e-06	0.00418551	0.00456044	0.33	TRUE
		rs12064798	A	T	-2.2111	0.4787	21.33	3.851e-06	0.000460718	0.00391791	0.91	TRUE
		rs1561271	A	G	-1.3215	0.2802	22.24	2.407e-06	-0.00151721	0.00216056	0.47	TRUE
		rs1914726	T	G	1.7495	0.3693	22.44	2.169e-06	-0.000284851	0.00233128	0.92	TRUE
		rs4689322	A	G	1.3623	0.2893	22.17	2.482e-06	-0.00052807	0.00216949	0.81	TRUE
		rs5016150	C	G	1.5781	0.3088	26.12	3.203e-07	-0.00102416	0.00227339	0.65	TRUE
		rs58127279	T	C	-5.1893	1.1243	21.3	3.922e-06	0.00626394	0.00499637	0.22	TRUE
		rs61731943	T	C	-5.8352	1.1882	24.12	9.054e-07	0.00767389	0.00711705	0.29	TRUE
		rs61948049	T	C	-4.8614	1.0332	22.14	2.538e-06	-6.53803e-05	0.00560171	0.98	TRUE
		rs9327072	A	G	1.3538	0.2961	20.9	4.845e-06	0.00134847	0.0022549	0.59	TRUE
THICK_precentral	cookedveg_TBSperday	rs10445105	T	G	0.0144	0.0029	24.66	5.543e-07	0.00532643	0.00478557	0.27	TRUE
		rs11063880	A	G	0.0041	0.0009	20.75	3.887e-06	-0.000298149	0.00227238	0.91	TRUE
		rs11158250	A	G	0.0054	0.001	29.16	2.401e-07	7.73613e-06	0.00265406	0.95	TRUE
		rs112216293	A	C	0.0116	0.0025	21.53	4.379e-06	0.00897806	0.00656428	0.17	TRUE
		rs1880694	A	G	-0.0071	0.0013	29.83	1.401e-08	0.00316147	0.00316342	0.32	TRUE
		rs2298485	C	G	-0.0043	0.0009	22.83	1.765e-06	-0.00152722	0.00215839	0.47	TRUE
		rs2523557	A	G	-0.0074	0.0014	27.94	2.042e-07	-0.00918867	0.00217148	2.2e-05	TRUE
		rs4452100	A	C	-0.0089	0.0019	21.94	2.747e-06	-0.00173557	0.00474166	0.69	TRUE
		rs4724413	T	C	0.0045	0.0009	25	1.375e-06	-0.00355007	0.00225617	0.13	TRUE
		rs57383320	T	C	-0.004	0.0009	19.75	2.957e-06	0.000989716	0.00216005	0.63	TRUE
		rs60892631	T	C	-0.012	0.0026	21.3	3.64e-06	-0.0034755	0.00599904	0.56	TRUE
		rs62400564	T	C	0.004	0.0009	19.75	3.286e-06	0.00797047	0.00217547	0.00021	TRUE
		rs79040955	T	C	-0.0054	0.0012	20.25	3.685e-06	-0.00141314	0.00296007	0.62	TRUE
		rs998852	A	C	0.0049	0.001	24.01	5.925e-07	0.00208302	0.00227131	0.38	TRUE
SA_fusiform	doyouaddsalt	rs10461616	T	C	-13.7952	2.5151	30.08	4.137e-08	-0.00243665	0.00233845	0.27	TRUE
		rs11243145	A	G	10.8188	2.3524	21.15	4.245e-06	0.00355369	0.00217696	0.088	TRUE
		rs114474233	A	G	-57.1386	11.7194	23.77	1.085e-06	-0.00205665	0.00767544	0.78	TRUE
		rs12915259	T	C	13.8181	2.888	22.89	1.713e-06	-0.00196456	0.00247828	0.5	TRUE
		rs144618127	A	C	28.8267	6.2642	21.18	4.189e-06	0.0109677	0.00600316	0.065	TRUE
		rs150609795	T	G	31.0406	6.5217	22.65	1.94e-06	0.00341204	0.00491922	0.49	TRUE
		rs17834032	T	C	16.0832	2.2426	51.43	7.416e-13	0.00131217	0.0020917	0.45	TRUE
		rs2074404	T	G	15.6606	2.7294	32.92	9.597e-09	-0.000494117	0.00254254	0.88	TRUE
		rs2254751	T	C	13.7549	2.9504	21.73	3.131e-06	-0.000766357	0.00271635	0.8	TRUE
		rs4552422	A	G	10.5066	2.2833	21.17	4.194e-06	0.00184883	0.00211205	0.44	TRUE
		rs4577147	T	C	-12.0702	2.5381	22.62	1.979e-06	0.000588952	0.00225517	0.83	TRUE
		rs4870505	A	C	11.5642	2.2693	25.97	3.469e-07	0.00129694	0.00209117	0.53	TRUE
		rs62242182	A	G	-12.5489	2.6068	23.17	1.481e-06	-0.000651029	0.00238273	0.77	TRUE
		rs658904	A	G	-11.2962	2.3768	22.59	2.006e-06	-0.000681785	0.00210453	0.76	TRUE
		rs7123402	A	T	-12.7203	2.4378	27.23	1.81e-07	0.000465544	0.00224941	0.8	TRUE
		rs77516432	T	C	58.274	12.3556	22.24	2.4e-06	0.00149027	0.011181	0.85	TRUE
		rs7831940	T	G	11.5496	2.4656	21.94	2.81e-06	0.000740205	0.0022264	0.75	TRUE
		rs7908468	T	C	-10.805	2.264	22.78	1.82e-06	0.000201828	0.00208741	0.94	TRUE
		rs799320	T	G	11.1444	2.4114	21.36	3.808e-06	0.00198373	0.00211518	0.32	TRUE
THICK_temporalpole	doyouaddsalt	rs113754989	T	G	0.0569	0.0123	21.4	3.89e-06	0.000279167	0.0104744	0.96	TRUE
		rs11641011	T	C	0.0113	0.0025	20.43	4.841e-06	-0.000623008	0.00209404	0.75	TRUE
		rs139607657	T	C	-0.0548	0.0119	21.21	4.366e-06	0.00575681	0.00646412	0.38	TRUE
		rs150930743	A	G	0.0783	0.0166	22.25	2.513e-06	-0.0046412	0.0132148	0.72	TRUE
		rs62572656	A	G	-0.0182	0.0038	22.94	2.193e-06	-0.000166418	0.00331068	0.98	TRUE
		rs73543117	T	C	-0.0404	0.0086	22.07	2.406e-06	0.00624886	0.00652462	0.31	TRUE
SA_frontalpole	freshfruit_piecesperday	rs10406632	T	C	1.7	0.3533	23.15	1.501e-06	0.00341831	0.00241483	0.16	TRUE
		rs113050298	T	C	-3.0819	0.6493	22.53	2.067e-06	-0.00567881	0.00452219	0.21	TRUE
		rs12064798	A	T	-2.2111	0.4787	21.33	3.851e-06	0.00318219	0.00388178	0.4	TRUE
		rs1561271	A	G	-1.3215	0.2802	22.24	2.407e-06	-0.00420212	0.00214034	0.041	TRUE
		rs1914726	T	G	1.7495	0.3693	22.44	2.169e-06	0.000177351	0.00231044	0.87	TRUE
		rs4689322	A	G	1.3623	0.2893	22.17	2.482e-06	0.00106659	0.00215054	0.6	TRUE
		rs5016150	C	G	1.5781	0.3088	26.12	3.203e-07	-0.00156527	0.00225385	0.53	TRUE
		rs58127279	T	C	-5.1893	1.1243	21.3	3.922e-06	-0.00600415	0.00495169	0.19	TRUE
		rs61731943	T	C	-5.8352	1.1882	24.12	9.054e-07	-0.00759216	0.00705637	0.27	TRUE
		rs61948049	T	C	-4.8614	1.0332	22.14	2.538e-06	-0.00130291	0.00555637	0.8	TRUE
		rs9327072	A	G	1.3538	0.2961	20.9	4.845e-06	0.00517352	0.00223522	0.027	TRUE
SA_fusiform	freshfruit_piecesperday	rs10461616	T	C	-13.7952	2.5151	30.08	4.137e-08	0.0080449	0.00234445	0.00078	TRUE
		rs11243145	A	G	10.8188	2.3524	21.15	4.245e-06	-0.00651479	0.00218224	0.0039	TRUE
		rs114474233	A	G	-57.1386	11.7194	23.77	1.085e-06	-0.00854765	0.00768969	0.24	TRUE
		rs12915259	T	C	13.8181	2.888	22.89	1.713e-06	-0.00172085	0.00248421	0.46	TRUE
		rs144618127	A	C	28.8267	6.2642	21.18	4.189e-06	-0.0100351	0.00601539	0.098	TRUE
		rs150609795	T	G	31.0406	6.5217	22.65	1.94e-06	-0.00650259	0.00493162	0.2	TRUE
		rs17834032	T	C	16.0832	2.2426	51.43	7.416e-13	-0.00378983	0.0020965	0.066	TRUE
		rs2074404	T	G	15.6606	2.7294	32.92	9.597e-09	-0.00851211	0.00254859	0.0008	TRUE
		rs2254751	T	C	13.7549	2.9504	21.73	3.131e-06	0.00376242	0.00272304	0.17	TRUE
		rs4552422	A	G	10.5066	2.2833	21.17	4.194e-06	1.2204e-05	0.0021174	0.96	TRUE
		rs4577147	T	C	-12.0702	2.5381	22.62	1.979e-06	0.00481147	0.00226068	0.036	TRUE
		rs4870505	A	C	11.5642	2.2693	25.97	3.469e-07	0.00205644	0.00209605	0.32	TRUE
		rs62242182	A	G	-12.5489	2.6068	23.17	1.481e-06	-0.00420153	0.00238877	0.069	TRUE
		rs658904	A	G	-11.2962	2.3768	22.59	2.006e-06	0.00570083	0.00210989	0.0055	TRUE
		rs7123402	A	T	-12.7203	2.4378	27.23	1.81e-07	-0.00111395	0.00225403	0.62	TRUE
		rs77516432	T	C	58.274	12.3556	22.24	2.4e-06	-0.00803253	0.0112096	0.5	TRUE
		rs7831940	T	G	11.5496	2.4656	21.94	2.81e-06	-0.0041302	0.0022311	0.054	TRUE
		rs7908468	T	C	-10.805	2.264	22.78	1.82e-06	0.00328479	0.00209202	0.12	TRUE
		rs799320	T	G	11.1444	2.4114	21.36	3.808e-06	-0.00144483	0.00212055	0.5	TRUE
SA_parsopercularis	freshfruit_piecesperday	rs112201661	A	G	25.7456	5.3914	22.8	1.794e-06	0.000293192	0.00596753	0.91	TRUE
		rs114875674	A	G	44.6386	8.746	26.05	3.327e-07	0.010223	0.00985067	0.32	TRUE
		rs115515870	A	G	36.0289	7.5419	22.82	1.778e-06	0.00346455	0.00700394	0.66	TRUE
		rs1159974	T	C	-9.1588	1.6201	31.96	1.575e-08	-0.00474281	0.00209296	0.026	TRUE
		rs11639391	T	C	-22.4308	2.9393	58.24	2.325e-14	-0.00530208	0.00366024	0.13	TRUE
		rs117623407	A	G	-11.8121	2.4565	23.12	1.521e-06	-0.00551139	0.00295018	0.045	TRUE
		rs117979082	C	G	-29.3876	5.7438	26.18	3.113e-07	-0.00263813	0.00475501	0.58	TRUE
		rs12071813	C	G	-8.2961	1.8028	21.18	4.19e-06	0.00122376	0.00229579	0.6	TRUE
		rs12626475	A	G	8.4299	1.7863	22.27	2.369e-06	0.00600206	0.00227108	0.0088	TRUE
		rs13237311	T	G	-8.8686	1.8759	22.35	2.272e-06	-0.00605877	0.00246166	0.017	TRUE
		rs148825261	A	G	-23.5476	4.9584	22.55	2.044e-06	0.00213866	0.00594676	0.67	TRUE
		rs186385445	A	G	54.9483	11.6819	22.12	2.555e-06	0.00754269	0.0105136	0.46	TRUE
		rs1921147	A	T	-8.1359	1.738	21.91	2.85e-06	0.00269769	0.00215689	0.19	TRUE
		rs35213849	T	G	-11.1418	2.2661	24.17	8.799e-07	-0.00114379	0.00260485	0.71	TRUE
		rs62410131	A	G	-12.6871	2.7612	21.11	4.333e-06	-0.0018641	0.00366989	0.54	TRUE
		rs6480159	A	G	-9.1721	1.9372	22.42	2.194e-06	-0.00210987	0.00253424	0.42	TRUE
		rs6500312	A	G	-9.7943	2.0161	23.6	1.185e-06	7.78605e-05	0.0023239	0.97	TRUE
		rs7317984	A	C	8.0903	1.7492	21.39	3.744e-06	-0.00181959	0.00226371	0.43	TRUE
		rs79994715	T	C	-15.7535	3.3454	22.17	2.49e-06	0.00106563	0.00369839	0.69	TRUE
		rs9435741	A	C	7.7186	1.6295	22.44	2.171e-06	-0.00261024	0.00210369	0.24	TRUE
SA_posteriorcingulate	freshfruit_piecesperday	rs10507278	C	G	6.7963	1.3861	24.04	9.424e-07	0.0046792	0.00297127	0.13	TRUE
		rs10788109	A	G	6.088	1.2521	23.64	1.161e-06	0.00122164	0.0020991	0.51	TRUE
		rs11161942	T	C	8.498	1.5317	30.78	2.889e-08	0.00395861	0.00309218	0.19	TRUE
		rs11598186	A	G	-5.1084	1.119	20.84	4.992e-06	0.00195386	0.00228154	0.39	TRUE
		rs116655825	A	G	12.6925	2.4853	26.08	3.273e-07	0.00723099	0.00502556	0.14	TRUE
		rs12500639	T	C	11.1357	2.3252	22.94	1.674e-06	0.00440136	0.0048465	0.33	TRUE
		rs12764880	T	C	-4.7729	1.0219	21.81	3.003e-06	-0.00187912	0.00211074	0.41	TRUE
		rs13071264	T	C	-5.2041	1.1346	21.04	4.498e-06	-0.002109	0.00226108	0.29	TRUE
		rs203026	A	G	9.586	2.0323	22.25	2.396e-06	0.00279846	0.00435964	0.57	TRUE
		rs2110944	T	C	5.19	1.0361	25.09	5.47e-07	-0.00345365	0.00209903	0.1	TRUE
		rs2235704	T	C	7.5886	1.6377	21.47	3.593e-06	0.000344121	0.00356445	0.84	TRUE
		rs2709085	T	C	-6.274	1.3302	22.25	2.401e-06	-0.00165778	0.00271572	0.56	TRUE
		rs34107459	T	C	8.5736	1.8118	22.39	2.222e-06	-0.000206572	0.0034194	0.95	TRUE
		rs459506	C	G	-19.8432	4.2441	21.86	2.933e-06	-0.0148987	0.00866487	0.078	TRUE
		rs4957375	T	C	5.9447	1.2435	22.85	1.749e-06	0.00248893	0.00255833	0.34	TRUE
		rs61894520	T	C	8.2376	1.7552	22.03	2.69e-06	-0.00162504	0.00336163	0.64	TRUE
		rs62015774	A	G	-9.9602	2.1449	21.56	3.423e-06	-0.00340386	0.00398106	0.37	TRUE
		rs6438404	T	C	7.5972	1.6523	21.14	4.269e-06	-0.00237124	0.00338157	0.44	TRUE
		rs77505740	A	G	7.023	1.4659	22.95	1.659e-06	0.00105281	0.00262132	0.66	TRUE
		rs77667547	A	G	15.7641	3.3248	22.48	2.123e-06	0.00127683	0.00535856	0.85	TRUE
		rs77935092	T	C	16.2217	3.1308	26.85	2.202e-07	0.000816582	0.00678646	0.86	TRUE
		rs7973557	A	G	-5.4608	1.1349	23.15	1.496e-06	0.00281758	0.0022706	0.26	TRUE
		rs8011815	A	G	5.5434	1.211	20.95	4.707e-06	0.00190872	0.00224641	0.35	TRUE
		rs892865	A	G	5.0152	1.0126	24.53	7.316e-07	-0.00101654	0.00209032	0.6	TRUE
SA_precuneus	freshfruit_piecesperday	rs113169134	T	C	-82.3547	17.8602	21.26	4.006e-06	-0.00421606	0.00876743	0.56	TRUE
		rs11761877	A	G	-13.7147	2.8038	23.93	1.001e-06	-0.0035632	0.00230984	0.12	TRUE
		rs12200595	T	G	16.7282	2.8925	33.45	7.323e-09	0.000499021	0.00235606	0.89	TRUE
		rs12898870	T	G	28.8403	5.6558	26	3.411e-07	1.54997e-05	0.0036677	0.96	TRUE
		rs142276016	T	C	-74.3144	15.8606	21.95	2.793e-06	-0.00422332	0.0079129	0.53	TRUE
		rs143720575	A	G	35.0161	3.9976	76.72	1.967e-18	0.00217685	0.00320056	0.57	TRUE
		rs188041043	T	C	-93.8761	20.4572	21.06	4.456e-06	-0.00328633	0.011101	0.77	TRUE
		rs1899498	A	G	-12.0191	2.6057	21.28	3.977e-06	0.00287861	0.00215032	0.17	TRUE
		rs2002338	A	T	13.4469	2.9413	20.9	4.838e-06	-0.000945262	0.00223217	0.74	TRUE
		rs2145275	T	C	12.1898	2.574	22.43	2.182e-06	-0.000202297	0.00213316	0.88	TRUE
		rs2294629	A	C	13.5235	2.9189	21.47	3.602e-06	-0.000109165	0.00244429	0.96	TRUE
		rs2559052	T	C	-13.3539	2.6599	25.2	5.155e-07	0.000694762	0.0020878	0.79	TRUE
		rs2703753	T	C	-15.3574	3.3071	21.56	3.42e-06	0.00396546	0.00263386	0.13	TRUE
		rs3133933	C	G	18.9474	3.962	22.87	1.733e-06	0.00160961	0.00328931	0.68	TRUE
		rs4507320	T	C	13.5653	2.6362	26.48	2.665e-07	0.0030021	0.00218445	0.17	TRUE
		rs4751614	A	T	-15.8438	3.0045	27.81	1.339e-07	-0.00224426	0.0024816	0.35	TRUE
		rs4811601	T	C	-12.3117	2.6099	22.25	2.39e-06	0.00153099	0.0021176	0.46	TRUE
		rs4885948	T	C	-22.4777	4.6394	23.47	1.266e-06	-0.00352103	0.00364745	0.36	TRUE
		rs56146063	T	C	12.9949	2.5792	25.38	4.698e-07	-0.000412871	0.00209872	0.95	TRUE
		rs56252769	T	C	-13.8132	2.9918	21.32	3.894e-06	-0.00374389	0.00237023	0.1	TRUE
		rs5763084	A	G	15.5963	3.2482	23.05	1.574e-06	0.00238739	0.0026724	0.37	TRUE
		rs59373415	C	G	22.6619	3.4377	43.46	4.333e-11	0.00927347	0.00285904	0.00097	TRUE
		rs60527077	A	G	-20.9075	4.5413	21.2	4.148e-06	0.00309813	0.00353543	0.44	TRUE
		rs660633	T	C	20.3804	4.1664	23.93	1e-06	0.00516498	0.00295775	0.065	TRUE
		rs6780351	A	C	-12.7644	2.5503	25.05	5.586e-07	0.00271138	0.00209041	0.18	TRUE
		rs7025685	T	C	12.7478	2.7684	21.2	4.13e-06	0.000293945	0.00234811	0.86	TRUE
		rs71357206	C	G	-27.1769	5.7096	22.66	1.937e-06	0.000621034	0.00496224	0.91	TRUE
		rs7210991	T	C	12.4062	2.5267	24.11	9.102e-07	0.000210241	0.00209379	0.86	TRUE
		rs74854087	A	C	-19.5064	3.558	30.06	4.196e-08	-0.00491212	0.00274696	0.097	TRUE
		rs7559976	T	C	-15.8212	2.7027	34.27	4.804e-09	-0.00245966	0.00211656	0.26	TRUE
		rs888814	T	G	14.4716	2.5682	31.75	1.751e-08	-0.000591552	0.00208775	0.77	TRUE
THICK_isthmuscingulate	freshfruit_piecesperday	rs112428159	A	G	0.0113	0.0025	20.43	4.252e-06	-0.000229541	0.00328669	0.9	TRUE
		rs11245365	A	G	-0.0086	0.0015	32.87	2.809e-08	0.00170723	0.00211162	0.46	TRUE
		rs115464872	A	G	0.0322	0.0069	21.78	3.119e-06	-0.0140446	0.00788106	0.079	TRUE
		rs117379775	T	C	0.0224	0.0044	25.92	3.128e-07	0.00485372	0.00511377	0.42	TRUE
		rs12412476	T	C	-0.0076	0.0016	22.56	3.251e-06	-0.000120642	0.00225141	0.99	TRUE
		rs141943328	C	G	-0.0319	0.0069	21.37	3.998e-06	-0.000377896	0.00774313	0.98	TRUE
		rs143921381	T	C	-0.0605	0.013	21.66	3.014e-06	0.00161172	0.0118667	0.87	TRUE
		rs150732334	A	G	0.0365	0.0077	22.47	2.071e-06	-0.0100345	0.00795172	0.19	TRUE
		rs1995014	A	C	-0.0087	0.0019	20.97	4.701e-06	0.0029025	0.00266181	0.3	TRUE
		rs2039396	C	G	0.011	0.002	30.25	4.819e-08	0.0011123	0.00260301	0.65	TRUE
		rs2791561	A	G	0.009	0.002	20.25	4.225e-06	0.000848499	0.00270012	0.7	TRUE
		rs3219466	A	G	0.0219	0.0046	22.67	1.999e-06	-0.00768238	0.00563251	0.18	TRUE
		rs35392772	A	C	-0.0095	0.0021	20.46	4.996e-06	0.00153246	0.00287694	0.6	TRUE
		rs35954886	T	C	0.0108	0.0023	22.05	2.093e-06	0.000631748	0.00265335	0.8	TRUE
		rs4647952	C	G	0.0241	0.0052	21.48	4.137e-06	-0.00310748	0.0058654	0.56	TRUE
		rs471905	A	G	-0.008	0.0016	25	9.581e-07	0.00124467	0.00212989	0.48	TRUE
		rs502808	A	G	0.0081	0.0017	22.7	1.095e-06	-0.000642707	0.00228343	0.82	TRUE
		rs55953614	A	T	-0.0105	0.0022	22.78	1.157e-06	-0.000417152	0.00283115	0.83	TRUE
		rs61810407	A	G	0.0131	0.0028	21.89	2.855e-06	-0.00221403	0.00376089	0.6	TRUE
		rs62172510	A	G	-0.0085	0.0016	28.22	2.084e-07	0.00455943	0.00224977	0.036	TRUE
		rs7152377	A	G	-0.0073	0.0016	20.82	3.423e-06	0.00368331	0.00221335	0.097	TRUE
		rs7381138	A	C	-0.0088	0.0016	30.25	2.753e-08	0.00682833	0.00213334	0.0012	TRUE
		rs77075562	T	C	0.0106	0.0022	23.21	2.241e-06	0.000565835	0.00295528	0.82	TRUE
		rs774380	T	C	-0.0071	0.0015	22.4	2.374e-06	0.000225034	0.00210152	0.83	TRUE
		rs775762	T	C	-0.0073	0.0015	23.68	1.706e-06	0.00148444	0.00212596	0.46	TRUE
		rs799084	A	G	0.0092	0.0017	29.29	7.607e-08	-0.00368981	0.00239773	0.13	TRUE
		rs8098802	T	C	0.0079	0.0015	27.74	2.787e-07	0.00332096	0.00210915	0.12	TRUE
		rs9783497	A	G	0.0077	0.0016	23.16	1.17e-06	-0.000189099	0.00217446	0.92	TRUE
SA_parsopercularis	hotdrinktemp	rs112201661	A	G	25.7456	5.3914	22.8	1.794e-06	-0.00630815	0.00598221	0.33	TRUE
		rs114875674	A	G	44.6386	8.746	26.05	3.327e-07	-0.00194846	0.00988252	0.86	TRUE
		rs115515870	A	G	36.0289	7.5419	22.82	1.778e-06	-0.00977836	0.00702356	0.14	TRUE
		rs1159974	T	C	-9.1588	1.6201	31.96	1.575e-08	-0.00197902	0.00209846	0.32	TRUE
		rs11639391	T	C	-22.4308	2.9393	58.24	2.325e-14	0.000125332	0.00366942	0.98	TRUE
		rs117623407	A	G	-11.8121	2.4565	23.12	1.521e-06	0.0110676	0.00295769	0.00024	TRUE
		rs117979082	C	G	-29.3876	5.7438	26.18	3.113e-07	0.00221676	0.00476719	0.62	TRUE
		rs12071813	C	G	-8.2961	1.8028	21.18	4.19e-06	-0.00154714	0.00230263	0.48	TRUE
		rs12626475	A	G	8.4299	1.7863	22.27	2.369e-06	0.000679391	0.00227637	0.75	TRUE
		rs13237311	T	G	-8.8686	1.8759	22.35	2.272e-06	0.000446107	0.00246878	0.86	TRUE
		rs148825261	A	G	-23.5476	4.9584	22.55	2.044e-06	-0.00212841	0.00596335	0.63	TRUE
		rs186385445	A	G	54.9483	11.6819	22.12	2.555e-06	0.00135934	0.0105397	0.89	TRUE
		rs1921147	A	T	-8.1359	1.738	21.91	2.85e-06	0.0018121	0.00216305	0.41	TRUE
		rs35213849	T	G	-11.1418	2.2661	24.17	8.799e-07	0.00273272	0.00261187	0.31	TRUE
		rs62410131	A	G	-12.6871	2.7612	21.11	4.333e-06	0.00566417	0.00367893	0.11	TRUE
		rs6480159	A	G	-9.1721	1.9372	22.42	2.194e-06	-0.00292201	0.00254157	0.25	TRUE
		rs6500312	A	G	-9.7943	2.0161	23.6	1.185e-06	0.00472092	0.00233023	0.04	TRUE
		rs7317984	A	C	8.0903	1.7492	21.39	3.744e-06	-0.0057915	0.00226989	0.01	TRUE
		rs79994715	T	C	-15.7535	3.3454	22.17	2.49e-06	0.00153398	0.00370728	0.65	TRUE
		rs9435741	A	C	7.7186	1.6295	22.44	2.171e-06	-0.000625248	0.00211	0.72	TRUE
SA_pericalcarine	lambmutton_overallfreq	rs1018422	T	C	-10.2275	1.8749	29.76	4.897e-08	0.00207762	0.00221594	0.35	TRUE
		rs10222454	A	G	10.5128	2.1275	24.42	7.76e-07	-0.00553513	0.00259843	0.032	TRUE
		rs10237149	A	G	13.0196	1.856	49.21	2.3e-12	0.00366124	0.00220159	0.092	TRUE
		rs11022129	T	C	13.5018	2.4307	30.85	2.781e-08	0.00149191	0.00249329	0.55	TRUE
		rs11103221	T	C	9.934	2.1676	21	4.587e-06	0.00218367	0.0022502	0.34	TRUE
		rs112041110	T	C	-9.9814	2.1637	21.28	3.966e-06	0.00112393	0.0023968	0.63	TRUE
		rs112108143	A	G	21.5658	4.6682	21.34	3.843e-06	-0.00280247	0.00528236	0.62	TRUE
		rs117892760	T	C	-39.0152	6.0077	42.17	8.346e-11	-0.00209692	0.00553748	0.69	TRUE
		rs1223090	A	G	12.1217	1.7919	45.76	1.336e-11	-0.00151879	0.00211886	0.48	TRUE
		rs12508031	A	T	-17.0593	3.0173	31.97	1.569e-08	0.00387054	0.00230484	0.087	TRUE
		rs12919058	A	C	-10.1959	1.9614	27.02	2.011e-07	0.00709764	0.00223382	0.0013	TRUE
		rs13135092	A	G	-19.7883	3.6613	29.21	6.489e-08	0.0128075	0.00383802	0.00092	TRUE
		rs147753572	A	C	34.0871	6.511	27.41	1.647e-07	-0.00421572	0.00762179	0.57	TRUE
		rs16822665	T	C	-8.6122	1.8739	21.12	4.311e-06	-0.00485691	0.0022974	0.033	TRUE
		rs17179798	A	G	10.2095	2.1846	21.84	2.962e-06	0.00241442	0.00256798	0.35	TRUE
		rs17368876	T	C	-11.5819	2.1708	28.47	9.535e-08	0.0024301	0.00248495	0.33	TRUE
		rs1934057	T	C	-9.9797	1.854	28.97	7.339e-08	0.00169463	0.00213075	0.42	TRUE
		rs2360283	T	C	11.154	2.4389	20.92	4.8e-06	-0.00537448	0.00252848	0.033	TRUE
		rs2761504	C	G	12.6653	2.6873	22.21	2.441e-06	0.00289106	0.00292242	0.31	TRUE
		rs2783130	A	G	-10.3639	1.7714	34.23	4.896e-09	0.00325794	0.00211109	0.11	TRUE
		rs2999158	T	C	-11.8567	1.9319	37.67	8.392e-10	0.000484194	0.00223177	0.82	TRUE
		rs34041682	A	C	-24.6314	5.1441	22.93	1.682e-06	-0.000778556	0.00522204	0.87	TRUE
		rs34721481	A	T	-12.9146	2.0166	41.01	1.513e-10	0.00118709	0.00233059	0.61	TRUE
		rs35029027	T	C	-11.8504	2.5763	21.16	4.228e-06	0.00277326	0.00299761	0.36	TRUE
		rs4526992	A	C	-13.5502	2.799	23.44	1.291e-06	-0.00235937	0.00327412	0.46	TRUE
		rs56236504	T	C	17.3032	3.7371	21.44	3.655e-06	-0.00313304	0.00314991	0.32	TRUE
		rs57334908	T	C	23.5312	4.3942	28.68	8.555e-08	-0.00552138	0.00480335	0.24	TRUE
		rs591883	A	G	-13.461	2.8853	21.77	3.08e-06	0.00206046	0.00350574	0.53	TRUE
		rs6537282	A	T	-10.7066	2.0516	27.23	1.801e-07	0.00269622	0.0023556	0.25	TRUE
		rs6868457	T	C	11.7694	1.7686	44.28	2.838e-11	3.78511e-05	0.00211931	0.99	TRUE
		rs71414080	T	C	26.9944	4.6634	33.51	7.099e-09	0.00286513	0.00412899	0.5	TRUE
		rs7211408	T	C	-9.2185	2.0062	21.11	4.327e-06	-0.00124946	0.00214679	0.54	TRUE
		rs73313052	A	G	-24.1848	2.6776	81.58	1.683e-19	0.00422868	0.00321333	0.19	TRUE
		rs74280517	T	C	17.4528	2.8452	37.63	8.557e-10	0.00403746	0.00337185	0.23	TRUE
		rs76890582	A	G	13.3024	2.3242	32.76	1.043e-08	0.00361039	0.0026958	0.18	TRUE
		rs921773	A	G	9.097	1.9794	21.12	4.31e-06	-0.00273615	0.00235789	0.24	TRUE
		rs9409142	T	C	9.0771	1.8154	25	5.728e-07	0.000681326	0.00215972	0.78	TRUE
		rs9727137	T	C	14.6504	3.1526	21.6	3.365e-06	-0.00142688	0.00270678	0.6	TRUE
		rs9851068	A	G	-9.5951	1.9677	23.78	1.081e-06	0.00397138	0.00229255	0.089	TRUE
SA_parsopercularis	milk_typeused_bin5	rs112201661	A	G	25.7456	5.3914	22.8	1.794e-06	-0.00112588	0.0039452	0.77	TRUE
		rs114875674	A	G	44.6386	8.746	26.05	3.327e-07	0.000343075	0.006524	0.96	TRUE
		rs115515870	A	G	36.0289	7.5419	22.82	1.778e-06	-0.00134035	0.00463295	0.77	TRUE
		rs1159974	T	C	-9.1588	1.6201	31.96	1.575e-08	0.000241361	0.00138418	0.87	TRUE
		rs11639391	T	C	-22.4308	2.9393	58.24	2.325e-14	0.00269268	0.00242044	0.27	TRUE
		rs117623407	A	G	-11.8121	2.4565	23.12	1.521e-06	0.00274149	0.00195063	0.16	TRUE
		rs117979082	C	G	-29.3876	5.7438	26.18	3.113e-07	0.00313076	0.00314502	0.32	TRUE
		rs12071813	C	G	-8.2961	1.8028	21.18	4.19e-06	-0.00133492	0.00152014	0.38	TRUE
		rs12626475	A	G	8.4299	1.7863	22.27	2.369e-06	-0.00115266	0.00150091	0.45	TRUE
		rs13237311	T	G	-8.8686	1.8759	22.35	2.272e-06	0.00409411	0.00162882	0.012	TRUE
		rs148825261	A	G	-23.5476	4.9584	22.55	2.044e-06	0.0018937	0.00393551	0.63	TRUE
		rs186385445	A	G	54.9483	11.6819	22.12	2.555e-06	-0.00372589	0.00695273	0.59	TRUE
		rs1921147	A	T	-8.1359	1.738	21.91	2.85e-06	-0.000652092	0.0014283	0.64	TRUE
		rs35213849	T	G	-11.1418	2.2661	24.17	8.799e-07	-0.00211578	0.00172272	0.22	TRUE
		rs62410131	A	G	-12.6871	2.7612	21.11	4.333e-06	-0.00161418	0.00242765	0.5	TRUE
		rs6480159	A	G	-9.1721	1.9372	22.42	2.194e-06	0.000501505	0.00167658	0.77	TRUE
		rs6500312	A	G	-9.7943	2.0161	23.6	1.185e-06	0.000516175	0.00153696	0.74	TRUE
		rs7317984	A	C	8.0903	1.7492	21.39	3.744e-06	0.000874766	0.00149699	0.55	TRUE
		rs79994715	T	C	-15.7535	3.3454	22.17	2.49e-06	0.00563375	0.00244471	0.021	TRUE
		rs9435741	A	C	7.7186	1.6295	22.44	2.171e-06	-0.00145646	0.00139293	0.29	TRUE
THICK_caudalanteriorcingulate	milk_typeused_bin5	rs10518920	A	C	0.0132	0.0029	20.72	4.066e-06	0.0030485	0.00241122	0.21	TRUE
		rs117174116	A	G	-0.0436	0.0085	26.31	2.944e-07	0.00100154	0.00474239	0.83	TRUE
		rs138502605	C	G	-0.0291	0.0057	26.06	3.677e-07	-0.0001205	0.00416724	0.97	TRUE
		rs140220606	A	C	-0.0179	0.0039	21.07	3.59e-06	-0.00139683	0.00305045	0.65	TRUE
		rs17184754	T	C	0.0281	0.0061	21.22	4.804e-06	0.00136318	0.00401854	0.74	TRUE
		rs2060060	A	G	-0.0082	0.0018	20.75	3.497e-06	-0.000873674	0.00138867	0.53	TRUE
		rs722395	T	C	-0.0087	0.0018	23.36	2.476e-06	-0.000695571	0.00142709	0.62	TRUE
		rs73528979	A	G	0.012	0.0025	23.04	1.925e-06	-0.000205163	0.00198331	0.91	TRUE
		rs77863985	T	G	0.0518	0.0103	25.29	4.811e-07	0.00507745	0.00497209	0.3	TRUE
		rs9929528	T	G	0.0175	0.0034	26.49	1.941e-07	0.000129294	0.00139967	0.93	TRUE
THICK_cuneus	milk_typeused_bin5	rs12810533	A	G	0.0056	0.0012	21.78	1.18e-06	-0.000921805	0.00159643	0.56	TRUE
		rs13107325	T	C	-0.0107	0.002	28.62	1.039e-07	-0.00835473	0.00263276	0.0015	TRUE
		rs145305258	A	G	0.0152	0.0033	21.22	3.553e-06	0.00313887	0.00463507	0.49	TRUE
		rs148240261	A	G	-0.0209	0.0044	22.56	1.788e-06	-0.00816436	0.00583123	0.16	TRUE
		rs187608611	C	G	0.0231	0.0047	24.16	9.269e-07	0.0046532	0.00539438	0.38	TRUE
		rs627325	T	C	-0.0056	0.0012	21.78	2.708e-06	-0.00159289	0.00162043	0.32	TRUE
		rs74826997	T	C	0.0093	0.0014	44.13	1.162e-10	-0.000514221	0.0020952	0.8	TRUE
		rs9511935	T	C	-0.0056	0.0012	21.78	1.607e-06	-0.0021192	0.0016875	0.21	TRUE
THICK_caudalanteriorcingulate	milk_typeused_bin9	rs10518920	A	C	0.0132	0.0029	20.72	4.066e-06	-0.00252875	0.00361349	0.47	TRUE
		rs117174116	A	G	-0.0436	0.0085	26.31	2.944e-07	-0.000990781	0.00710699	0.9	TRUE
		rs138502605	C	G	-0.0291	0.0057	26.06	3.677e-07	-0.003378	0.00624493	0.59	TRUE
		rs140220606	A	C	-0.0179	0.0039	21.07	3.59e-06	-0.00263427	0.00457095	0.55	TRUE
		rs17184754	T	C	0.0281	0.0061	21.22	4.804e-06	-0.00432564	0.00602176	0.48	TRUE
		rs2060060	A	G	-0.0082	0.0018	20.75	3.497e-06	0.00181309	0.00208108	0.39	TRUE
		rs722395	T	C	-0.0087	0.0018	23.36	2.476e-06	0.00109699	0.00213865	0.61	TRUE
		rs73528979	A	G	0.012	0.0025	23.04	1.925e-06	0.000406719	0.00297198	0.93	TRUE
		rs77863985	T	G	0.0518	0.0103	25.29	4.811e-07	-0.00879652	0.007451	0.23	TRUE
		rs9929528	T	G	0.0175	0.0034	26.49	1.941e-07	-0.00169099	0.00209756	0.43	TRUE
SA_inferiortemporal	nonoilyfish_overallfreq	rs10188761	A	C	22.4328	4.8487	21.41	3.718e-06	-0.00161847	0.00284008	0.55	TRUE
		rs10827370	A	G	13.4047	2.6898	24.84	6.245e-07	0.00051359	0.00220638	0.81	TRUE
		rs115840240	A	G	-40.2433	8.5892	21.95	2.795e-06	0.0025568	0.00553456	0.64	TRUE
		rs11854306	A	G	15.5912	3.1026	25.25	5.027e-07	-0.0035758	0.002502	0.16	TRUE
		rs12291662	T	C	-12.757	2.682	22.62	1.969e-06	-0.00174009	0.00220791	0.44	TRUE
		rs12345891	T	C	-19.487	4.2347	21.18	4.189e-06	0.000257159	0.0033842	0.9	TRUE
		rs12656108	A	G	12.795	2.7244	22.06	2.648e-06	-0.00324497	0.00222053	0.15	TRUE
		rs13281310	C	G	-38.2438	8.1463	22.04	2.671e-06	-0.00376521	0.00579978	0.5	TRUE
		rs1335132	A	G	37.0813	7.9094	21.98	2.755e-06	-0.00794438	0.00647039	0.23	TRUE
		rs13355020	A	T	12.9297	2.8243	20.96	4.693e-06	0.00195026	0.00227223	0.39	TRUE
		rs13420492	A	G	15.766	3.4096	21.38	3.763e-06	0.000179607	0.0027664	0.95	TRUE
		rs139189083	A	G	34.4347	7.4066	21.61	3.333e-06	0.0133766	0.00673468	0.046	TRUE
		rs160459	A	C	12.5665	2.5925	23.5	1.252e-06	0.00482266	0.00211852	0.024	TRUE
		rs2391122	C	G	14.852	2.8722	26.74	2.33e-07	0.00132733	0.00236539	0.59	TRUE
		rs35024926	A	G	-25.3019	5.4505	21.55	3.449e-06	-0.00451145	0.00419498	0.27	TRUE
		rs55875454	T	C	43.1004	8.5634	25.33	4.826e-07	0.00385472	0.00701779	0.6	TRUE
		rs56896612	T	G	-20.8883	4.4701	21.84	2.97e-06	-0.00549603	0.00256914	0.032	TRUE
		rs62480516	A	T	18.1087	3.9099	21.45	3.629e-06	0.00618461	0.00270021	0.022	TRUE
		rs73006822	T	C	21.0903	4.0716	26.83	2.22e-07	0.00573052	0.00295376	0.056	TRUE
		rs7535519	A	G	-12.4919	2.7115	21.22	4.086e-06	-0.00736596	0.00221345	0.00089	TRUE
		rs761743	A	G	16.0641	3.0919	26.99	2.041e-07	0.00224047	0.00254388	0.38	TRUE
		rs77102251	C	G	31.6259	6.7183	22.16	2.508e-06	0.00694716	0.00500168	0.16	TRUE
		rs7742928	T	G	-19.254	4.0096	23.06	1.571e-06	-0.000992541	0.00282691	0.74	TRUE
		rs78003136	T	G	12.6241	2.686	22.09	2.602e-06	-0.00187068	0.00213549	0.38	TRUE
		rs888814	T	G	12.7978	2.6013	24.2	8.663e-07	0.00160164	0.00210915	0.46	TRUE
		rs9309013	A	G	-16.7258	2.8511	34.42	4.45e-09	-0.000560631	0.00228156	0.83	TRUE
		rs9648514	T	C	-12.8079	2.6492	23.37	1.333e-06	-0.000143113	0.0021545	0.96	TRUE
SA_medialorbitofrontal	nonoilyfish_overallfreq	rs12022854	T	C	8.9042	1.8576	22.98	1.64e-06	-0.0017347	0.00316074	0.6	TRUE
		rs1333996	T	C	6.7533	1.439	22.02	2.69e-06	-0.00331929	0.00230256	0.15	TRUE
		rs148184316	A	G	-40.0772	7.7444	26.78	2.28e-07	0.0167643	0.0117234	0.15	TRUE
		rs1541999	C	G	8.7965	1.8086	23.66	1.153e-06	-0.000960157	0.00241601	0.71	TRUE
		rs1986725	A	C	-6.0585	1.2888	22.1	2.592e-06	0.000657842	0.00216742	0.77	TRUE
		rs2131030	A	G	-11.5594	2.4366	22.51	2.095e-06	0.0032714	0.00427395	0.43	TRUE
		rs2514467	T	C	-7.5476	1.4687	26.41	2.763e-07	0.00361185	0.00246196	0.15	TRUE
		rs61795077	T	G	-14.1503	2.9973	22.29	2.347e-06	0.00175658	0.0031535	0.6	TRUE
		rs6949428	A	G	-6.3992	1.337	22.91	1.699e-06	0.0032005	0.00224252	0.16	TRUE
		rs7124681	A	C	6.573	1.2898	25.97	3.466e-07	-0.00136142	0.00214352	0.54	TRUE
THICK_cuneus	nonoilyfish_overallfreq	rs12810533	A	G	0.0056	0.0012	21.78	1.18e-06	0.000920995	0.00243787	0.7	TRUE
		rs13107325	T	C	-0.0107	0.002	28.62	1.039e-07	-0.00214649	0.0040209	0.6	TRUE
		rs145305258	A	G	0.0152	0.0033	21.22	3.553e-06	0.00888291	0.00707593	0.2	TRUE
		rs148240261	A	G	-0.0209	0.0044	22.56	1.788e-06	0.00079568	0.00890691	0.91	TRUE
		rs187608611	C	G	0.0231	0.0047	24.16	9.269e-07	0.0127559	0.00823512	0.12	TRUE
		rs627325	T	C	-0.0056	0.0012	21.78	2.708e-06	-0.00164291	0.002474	0.52	TRUE
		rs74826997	T	C	0.0093	0.0014	44.13	1.162e-10	0.000476715	0.00319924	0.9	TRUE
		rs9511935	T	C	-0.0056	0.0012	21.78	1.607e-06	0.00101923	0.00257645	0.69	TRUE
THICK_inferiortemporal	nonoilyfish_overallfreq	rs111735741	A	G	0.007	0.0014	25	1.13e-06	0.00495658	0.00253645	0.051	TRUE
		rs12121292	T	C	-0.0056	0.0012	21.78	2.718e-06	-0.00147346	0.00239972	0.54	TRUE
		rs13069343	A	T	0.0064	0.0013	24.24	6.674e-07	0.00353056	0.00269248	0.18	TRUE
		rs140690295	T	C	0.011	0.0024	21.01	4.927e-06	-0.00339491	0.00460855	0.47	TRUE
		rs142523826	A	G	-0.0177	0.0038	21.7	4.222e-06	0.00581568	0.00751456	0.44	TRUE
		rs143504301	T	G	0.0378	0.0082	21.25	3.944e-06	0.00543592	0.0104629	0.57	TRUE
		rs149495718	A	G	-0.025	0.0051	24.03	1.004e-06	0.00273484	0.00853899	0.74	TRUE
		rs150909965	A	C	-0.0287	0.0063	20.75	4.395e-06	-0.0140461	0.0106428	0.2	TRUE
		rs35625067	A	G	-0.0304	0.0066	21.22	3.589e-06	-0.0245008	0.00860206	0.0048	TRUE
		rs62305730	A	C	-0.0063	0.0013	23.49	2.891e-06	0.000611728	0.00280037	0.82	TRUE
		rs6545675	A	G	0.0055	0.0012	21.01	3.462e-06	0.00539787	0.00256725	0.033	TRUE
		rs6684777	A	T	-0.0184	0.004	21.16	3.441e-06	-0.00742543	0.00575859	0.19	TRUE
		rs737280	T	C	0.0054	0.0011	24.1	1.615e-06	-0.000102443	0.00235407	0.95	TRUE
		rs751312	T	C	0.0049	0.001	24.01	2.626e-06	0.00200126	0.0021848	0.36	TRUE
		rs7578279	T	C	-0.0055	0.0011	25	7.93e-07	-0.000115884	0.00217059	0.95	TRUE
		rs77061978	A	T	-0.0104	0.0022	22.35	1.549e-06	0.00396125	0.00424282	0.37	TRUE
		rs7849213	T	C	-0.006	0.0012	25	5.842e-07	-6.45902e-05	0.00219715	0.97	TRUE
		rs9594346	A	T	0.0118	0.0025	22.28	3.503e-06	0.003031	0.00437088	0.48	TRUE
THICK_posteriorcingulate	nonoilyfish_overallfreq	rs11138251	T	C	-0.0081	0.0018	20.25	4.05e-06	0.0048863	0.00330169	0.14	TRUE
		rs112138247	T	C	-0.0121	0.0026	21.66	3.922e-06	0.00584264	0.00447356	0.2	TRUE
		rs116212874	A	G	0.0192	0.0041	21.93	3.081e-06	-0.0011024	0.00768914	0.89	TRUE
		rs12612855	T	C	0.0055	0.0012	21.01	4.491e-06	0.00146359	0.00227717	0.53	TRUE
		rs12884411	A	C	0.005	0.0011	20.66	3.912e-06	0.00243326	0.00211262	0.24	TRUE
		rs13398130	T	C	0.007	0.0015	21.78	1.656e-06	-0.00230862	0.00273169	0.4	TRUE
		rs2415142	T	G	0.0051	0.0011	21.5	3.875e-06	-0.00400981	0.00212443	0.057	TRUE
		rs56120749	A	T	-0.0083	0.0018	21.26	2.782e-06	0.00379264	0.00329866	0.25	TRUE
		rs61570328	A	G	-0.0067	0.0011	37.1	1.657e-09	-0.00167194	0.00219772	0.47	TRUE
		rs7163376	A	T	-0.0065	0.0013	25	7.709e-07	0.000790626	0.00223838	0.73	TRUE
		rs7827581	T	G	-0.0055	0.0011	25	1.293e-06	0.00169726	0.00216918	0.45	TRUE
		rs8011016	T	C	-0.0077	0.0015	26.35	1.176e-07	0.0027555	0.00263787	0.31	TRUE
		rs9485495	A	T	0.0098	0.0021	21.78	3.461e-06	-0.0051374	0.00390153	0.19	TRUE
THICK_rostralanteriorcingulate	nonoilyfish_overallfreq	rs111379945	A	C	-0.0121	0.0022	30.25	6.723e-08	0.000138171	0.00276078	0.94	TRUE
		rs11245271	A	G	-0.0263	0.0055	22.87	1.981e-06	0.00899204	0.00680303	0.2	TRUE
		rs11724182	T	C	0.0142	0.003	22.4	1.713e-06	-0.00144384	0.00359602	0.68	TRUE
		rs117847715	T	C	0.0212	0.0045	22.19	2.52e-06	-0.0149551	0.00497062	0.0027	TRUE
		rs12139450	T	C	0.0132	0.0029	20.72	4.863e-06	0.00617716	0.00331869	0.065	TRUE
		rs12973020	A	C	-0.009	0.0019	22.44	2.77e-06	0.00394937	0.00214	0.067	TRUE
		rs13061984	A	T	0.015	0.0031	23.41	1.14e-06	0.000538325	0.0037196	0.89	TRUE
		rs141001502	T	G	-0.0304	0.0066	21.22	4.614e-06	-0.00280148	0.00740837	0.71	TRUE
		rs146014306	A	G	-0.0179	0.0038	22.19	3.093e-06	0.00737931	0.0053347	0.16	TRUE
		rs146343715	T	C	-0.0449	0.0092	23.82	9.402e-07	0.00222991	0.0130936	0.87	TRUE
		rs150599115	A	G	0.0303	0.0065	21.73	3.174e-06	-0.0152486	0.00824281	0.064	TRUE
		rs2545493	A	G	0.0122	0.0025	23.81	1.442e-06	-0.0102425	0.0031926	0.0014	TRUE
		rs2911422	C	G	0.008	0.0017	22.15	4.375e-06	-0.0060316	0.00214605	0.0046	FALSE
		rs56745865	T	C	-0.0118	0.0025	22.28	3.387e-06	0.00128574	0.00287056	0.65	TRUE
		rs61874539	T	C	0.0252	0.0051	24.42	9.874e-07	-0.0055797	0.00560847	0.31	TRUE
		rs6503842	A	G	-0.0113	0.0024	22.17	1.67e-06	-0.00396886	0.00256578	0.12	TRUE
		rs729809	A	G	0.0086	0.0019	20.49	3.21e-06	-0.00675864	0.00219254	0.002	TRUE
		rs73159164	C	G	-0.0167	0.0035	22.77	1.688e-06	0.00876085	0.00398561	0.029	TRUE
		rs73598282	A	G	-0.0714	0.0148	23.27	1.435e-06	0.002979	0.0147786	0.83	TRUE
		rs73623808	A	T	0.0153	0.0032	22.86	2.27e-06	-0.00656962	0.00429773	0.13	TRUE
		rs74395315	T	C	0.0249	0.0054	21.26	4.807e-06	-0.00123329	0.00700213	0.86	TRUE
		rs77479170	A	G	0.0089	0.0019	21.94	2.765e-06	-0.00141974	0.0021274	0.51	TRUE
		rs8015900	A	T	0.0102	0.0021	23.59	7.914e-07	-0.00155981	0.00256169	0.55	TRUE
		rs8125543	A	G	-0.0186	0.0039	22.75	1.512e-06	-0.00339437	0.00491526	0.5	TRUE
THICK_superiorparietal	nonoilyfish_overallfreq	rs113351665	C	G	0.008	0.0017	22.15	2.775e-06	0.000441952	0.00422413	0.95	TRUE
		rs117041860	T	C	-0.0108	0.0022	24.1	5.948e-07	-0.00557599	0.00644195	0.38	TRUE
		rs1452628	A	T	-0.0041	0.0007	34.31	2.605e-08	-0.0017001	0.0021779	0.42	TRUE
		rs35288226	A	G	0.0039	0.0008	23.77	7.818e-07	0.000412634	0.00224912	0.86	TRUE
		rs45459595	T	C	0.0169	0.0036	22.04	3.068e-06	-6.39658e-05	0.00738461	0.97	TRUE
		rs4556147	A	T	0.0046	0.0009	26.12	1.088e-07	0.000494937	0.00254821	0.83	TRUE
		rs4900344	T	C	0.0038	0.0008	22.56	5.925e-07	0.00448594	0.00225868	0.048	TRUE
		rs56023709	A	C	-0.0054	0.0007	59.51	6.526e-14	-0.006132	0.00217456	0.0044	TRUE
		rs597455	T	C	-0.0041	0.0009	20.75	4.569e-06	0.000658478	0.00277524	0.8	TRUE
		rs61416649	A	C	0.0075	0.0016	21.97	3.243e-06	0.00501892	0.00524563	0.32	TRUE
		rs61976173	A	G	-0.0038	0.0008	22.56	2.565e-06	-0.000896763	0.00246463	0.72	TRUE
		rs62117065	T	G	0.0075	0.0014	28.7	1.591e-07	0.00286098	0.00413187	0.5	TRUE
		rs73215353	T	C	0.0073	0.0012	37.01	3.513e-09	-0.00425512	0.00357035	0.24	TRUE
		rs78129834	T	C	0.0074	0.0015	24.34	1.87e-06	0.00852992	0.00346601	0.014	TRUE
SA_transversetemporal	oilyfish_overallfreq	rs11177573	T	C	2.9604	0.5894	25.23	5.099e-07	-0.00240559	0.00252432	0.35	TRUE
		rs112315969	A	T	-3.0489	0.6676	20.86	4.956e-06	0.0037216	0.00272318	0.19	TRUE
		rs11684511	A	G	3.182	0.4665	46.53	9.04e-12	0.00163434	0.00217469	0.46	TRUE
		rs117292774	T	C	8.3423	1.8168	21.08	4.398e-06	-0.00733092	0.00735493	0.31	TRUE
		rs118159070	C	G	-9.7014	2.0358	22.71	1.884e-06	0.00223811	0.0102867	0.84	TRUE
		rs12188147	T	C	6.3358	1.3736	21.28	3.978e-06	0.0068941	0.00583322	0.23	TRUE
		rs12523195	T	C	2.6534	0.5584	22.58	2.019e-06	0.00441865	0.00216252	0.041	TRUE
		rs12630152	T	G	-3.5505	0.7449	22.72	1.876e-06	0.006047	0.00363009	0.083	TRUE
		rs1299873	T	C	-7.0402	1.4916	22.28	2.359e-06	0.00899066	0.00551966	0.12	TRUE
		rs13215163	A	G	-5.5725	1.0985	25.73	3.919e-07	0.00675706	0.00468245	0.15	TRUE
		rs145440333	A	G	14.163	2.5739	30.28	3.744e-08	-0.00221445	0.0152446	0.9	TRUE
		rs149525891	A	G	4.525	0.9257	23.89	1.018e-06	-0.00442335	0.00452175	0.36	TRUE
		rs167684	A	G	2.623	0.4877	28.93	7.534e-08	0.001582	0.0022707	0.48	TRUE
		rs187655775	A	C	-10.3258	2.2281	21.48	3.58e-06	0.0141813	0.00997101	0.15	TRUE
		rs1914474	C	G	2.3467	0.4692	25.01	5.686e-07	-0.0018834	0.002163	0.38	TRUE
		rs36065378	A	G	-3.674	0.6335	33.63	6.659e-09	0.000844877	0.00291478	0.83	TRUE
		rs3796205	C	G	-2.4065	0.4783	25.31	4.87e-07	0.00438058	0.00221104	0.049	TRUE
		rs4312310	C	G	-4.685	0.9837	22.68	1.909e-06	-0.000948998	0.00420071	0.81	TRUE
		rs4566132	A	G	4.6964	1.0149	21.41	3.705e-06	-0.000713721	0.00426651	0.86	TRUE
		rs4706391	A	T	-3.2684	0.5836	31.36	2.142e-08	-0.00240804	0.00280138	0.33	TRUE
		rs502324	T	G	-2.4904	0.5361	21.58	3.393e-06	-0.00236387	0.00255271	0.36	TRUE
		rs56166118	A	C	3.6688	0.7946	21.32	3.887e-06	0.0034075	0.00364176	0.36	TRUE
		rs62151643	T	C	-2.3485	0.5052	21.61	3.338e-06	-0.00204781	0.00234422	0.4	TRUE
		rs6467914	T	C	-3.5547	0.7364	23.3	1.385e-06	-0.00448308	0.00336367	0.2	TRUE
		rs6516720	A	C	6.7288	1.3414	25.16	5.266e-07	-0.0105806	0.00543352	0.049	TRUE
		rs72701956	A	G	-16.1295	3.3855	22.7	1.895e-06	0.00921062	0.00896322	0.29	TRUE
		rs72782626	A	G	2.9392	0.5657	27	2.043e-07	-0.00412441	0.0026245	0.11	TRUE
		rs72834200	A	G	-5.3514	1.0895	24.13	9.03e-07	0.0154026	0.00539793	0.0038	TRUE
		rs745383	T	C	-2.5896	0.5343	23.49	1.255e-06	0.00290836	0.00251326	0.24	TRUE
		rs74631192	A	G	5.3103	1.1494	21.34	3.838e-06	0.00384759	0.00413349	0.34	TRUE
		rs7560683	T	C	3.531	0.632	31.21	2.312e-08	0.000306596	0.00298686	0.89	TRUE
		rs7642773	A	G	2.9324	0.5322	30.36	3.585e-08	-0.00421467	0.00246363	0.089	TRUE
		rs7759024	A	C	-7.9522	1.6118	24.34	8.072e-07	0.00767495	0.00711616	0.26	TRUE
		rs9286062	A	G	2.2784	0.4596	24.58	7.149e-07	-0.0119025	0.00213743	2.8e-08	TRUE
		rs9388755	C	G	-7.9205	1.6339	23.5	1.249e-06	-0.0121629	0.00740958	0.099	TRUE
THICK_caudalanteriorcingulate	oilyfish_overallfreq	rs10518920	A	C	0.0132	0.0029	20.72	4.066e-06	-0.00202483	0.00367191	0.58	TRUE
		rs117174116	A	G	-0.0436	0.0085	26.31	2.944e-07	0.00367651	0.00721746	0.61	TRUE
		rs138502605	C	G	-0.0291	0.0057	26.06	3.677e-07	-0.00990057	0.00634405	0.13	TRUE
		rs140220606	A	C	-0.0179	0.0039	21.07	3.59e-06	0.00521402	0.00464158	0.24	TRUE
		rs17184754	T	C	0.0281	0.0061	21.22	4.804e-06	0.00715173	0.00611904	0.26	TRUE
		rs2060060	A	G	-0.0082	0.0018	20.75	3.497e-06	0.0010511	0.00211506	0.63	TRUE
		rs722395	T	C	-0.0087	0.0018	23.36	2.476e-06	-0.00019588	0.00217288	0.97	TRUE
		rs73528979	A	G	0.012	0.0025	23.04	1.925e-06	-0.0064821	0.00301931	0.033	TRUE
		rs77863985	T	G	0.0518	0.0103	25.29	4.811e-07	-0.0122023	0.00757169	0.099	TRUE
		rs9929528	T	G	0.0175	0.0034	26.49	1.941e-07	-0.00663696	0.00213124	0.0018	TRUE
THICK_paracentral	oilyfish_overallfreq	rs111245111	A	G	0.0221	0.0048	21.2	4.702e-06	0.00232502	0.00728718	0.75	TRUE
		rs11759026	A	G	-0.0065	0.0012	29.34	5.227e-08	0.00426793	0.00252199	0.098	TRUE
		rs13288595	A	G	-0.006	0.0013	21.3	3.676e-06	0.00126658	0.00248289	0.61	TRUE
		rs169529	T	G	-0.0054	0.0012	20.25	4.231e-06	0.00309201	0.00238494	0.2	TRUE
		rs1861109	C	G	0.005	0.001	25	5.356e-07	-0.00292871	0.00218814	0.18	TRUE
		rs28280	A	G	0.0053	0.0011	23.21	3.351e-06	0.00126769	0.00228165	0.61	TRUE
		rs28480305	T	C	0.0141	0.0031	20.69	4.569e-06	0.0012741	0.00612585	0.84	TRUE
		rs35762958	T	C	-0.0071	0.0014	25.72	2.026e-07	0.00457936	0.00290549	0.1	TRUE
		rs56161910	A	G	-0.0134	0.0029	21.35	3.984e-06	0.000780627	0.00561162	0.83	TRUE
		rs60060223	T	C	0.0129	0.0026	24.62	9.646e-07	-0.00441233	0.00525237	0.4	TRUE
		rs6039837	T	C	0.0049	0.001	24.01	2.944e-06	-0.00708932	0.00229728	0.0019	TRUE
		rs73813939	T	G	0.0091	0.0019	22.94	1.489e-06	-0.0109585	0.0041032	0.0088	TRUE
		rs77117193	A	G	0.0117	0.0025	21.9	2.165e-06	-0.0088176	0.00511382	0.1	TRUE
		rs77473778	C	G	-0.0285	0.0062	21.13	3.877e-06	0.022168	0.00801038	0.0058	TRUE
THICK_precentral	oilyfish_overallfreq	rs10445105	T	G	0.0144	0.0029	24.66	5.543e-07	0.0156508	0.00477961	0.00087	TRUE
		rs11063880	A	G	0.0041	0.0009	20.75	3.887e-06	-0.000718917	0.00226875	0.78	TRUE
		rs11158250	A	G	0.0054	0.001	29.16	2.401e-07	-0.0019105	0.00264975	0.44	TRUE
		rs112216293	A	C	0.0116	0.0025	21.53	4.379e-06	0.0074717	0.00655822	0.27	TRUE
		rs1880694	A	G	-0.0071	0.0013	29.83	1.401e-08	-0.00426098	0.00315794	0.16	TRUE
		rs2298485	C	G	-0.0043	0.0009	22.83	1.765e-06	0.0047703	0.00215478	0.031	TRUE
		rs2523557	A	G	-0.0074	0.0014	27.94	2.042e-07	-0.00847099	0.00216807	9.5e-05	TRUE
		rs4452100	A	C	-0.0089	0.0019	21.94	2.747e-06	0.000467041	0.00473465	0.93	TRUE
		rs4724413	T	C	0.0045	0.0009	25	1.375e-06	-0.00287843	0.00225246	0.22	TRUE
		rs57383320	T	C	-0.004	0.0009	19.75	2.957e-06	0.00115149	0.00215683	0.57	TRUE
		rs60892631	T	C	-0.012	0.0026	21.3	3.64e-06	-0.00576126	0.00599159	0.32	TRUE
		rs62400564	T	C	0.004	0.0009	19.75	3.286e-06	0.00507264	0.00217224	0.021	TRUE
		rs79040955	T	C	-0.0054	0.0012	20.25	3.685e-06	-0.00139377	0.00295602	0.66	TRUE
		rs998852	A	C	0.0049	0.001	24.01	5.925e-07	0.00153561	0.00226752	0.49	TRUE
THICK_superiortemporal	oilyfish_overallfreq	rs111063735	A	G	0.0043	0.0009	22.83	4.372e-06	7.13654e-05	0.00211104	0.98	TRUE
		rs149379399	C	G	-0.0105	0.0022	22.78	1.715e-06	-0.00409295	0.00444287	0.4	TRUE
		rs189171241	T	G	0.0388	0.0084	21.34	3.285e-06	0.00585597	0.0117395	0.61	TRUE
		rs191280299	A	T	0.006	0.0012	25	1.283e-06	0.00438325	0.0025914	0.08	TRUE
		rs2003067	T	C	-0.0089	0.0019	21.94	4.95e-06	-0.0022478	0.00446257	0.6	TRUE
		rs4688759	T	C	0.0089	0.0016	30.94	1.661e-08	0.0187057	0.00471698	0.0001	TRUE
		rs61784835	T	C	-0.0063	0.0011	32.8	3.48e-08	-0.00187588	0.00220544	0.39	TRUE
		rs7593003	A	G	-0.0044	0.0009	23.9	2.47e-06	-0.00132375	0.00213314	0.52	TRUE
		rs7621573	T	C	0.0049	0.001	24.01	3.095e-07	0.00551869	0.00215302	0.0094	TRUE
		rs79818178	A	G	0.0195	0.0038	26.33	3.689e-07	-0.00592817	0.00957957	0.5	TRUE
		rs80137470	A	G	0.0119	0.0026	20.95	3.386e-06	-0.00223294	0.00535073	0.65	TRUE
SA_medialorbitofrontal	pork_overallfreq	rs12022854	T	C	8.9042	1.8576	22.98	1.64e-06	0.00145391	0.00315699	0.64	TRUE
		rs1333996	T	C	6.7533	1.439	22.02	2.69e-06	-0.000616181	0.00229973	0.78	TRUE
		rs148184316	A	G	-40.0772	7.7444	26.78	2.28e-07	-0.000291264	0.0117035	0.98	TRUE
		rs1541999	C	G	8.7965	1.8086	23.66	1.153e-06	-0.000409141	0.0024131	0.86	TRUE
		rs1986725	A	C	-6.0585	1.2888	22.1	2.592e-06	-0.000310684	0.00216488	0.9	TRUE
		rs2131030	A	G	-11.5594	2.4366	22.51	2.095e-06	0.00262367	0.0042694	0.54	TRUE
		rs2514467	T	C	-7.5476	1.4687	26.41	2.763e-07	-0.00109493	0.00245914	0.67	TRUE
		rs61795077	T	G	-14.1503	2.9973	22.29	2.347e-06	-0.00807788	0.00314984	0.0094	TRUE
		rs6949428	A	G	-6.3992	1.337	22.91	1.699e-06	-0.00251564	0.00223986	0.26	TRUE
		rs7124681	A	C	6.573	1.2898	25.97	3.466e-07	0.00153007	0.00214102	0.46	TRUE
SA_parstriangularis	pork_overallfreq	rs10278627	A	G	-14.2121	1.6167	77.28	1.484e-18	-0.00295905	0.00228061	0.19	TRUE
		rs1080066	A	G	17.0355	2.6972	39.89	2.685e-10	0.000228277	0.00367729	0.94	TRUE
		rs112593021	T	C	-8.868	1.9062	21.64	3.285e-06	0.00177802	0.00270248	0.5	TRUE
		rs114640614	A	G	39.4557	8.5241	21.43	3.679e-06	-0.00379295	0.00865518	0.67	TRUE
		rs12699999	A	G	7.7959	1.5636	24.86	6.171e-07	-0.00411782	0.00220554	0.062	TRUE
		rs13174854	A	G	-8.2524	1.5761	27.42	1.641e-07	0.00132438	0.00212904	0.52	TRUE
		rs139156689	T	C	-42.0324	9.159	21.06	4.449e-06	0.00267177	0.00990592	0.8	TRUE
		rs180901614	A	G	-40.8304	8.8459	21.31	3.917e-06	0.0106482	0.0125562	0.39	TRUE
		rs187363957	T	C	-16.4708	3.2893	25.07	5.517e-07	0.00848616	0.00427042	0.045	TRUE
		rs2216964	T	C	7.9793	1.6057	24.69	6.716e-07	-0.00430523	0.00226447	0.057	TRUE
		rs2279829	T	C	19.8196	1.8263	117.77	1.941e-27	-0.00397015	0.00257113	0.12	TRUE
		rs2287283	T	C	8.2445	1.5682	27.64	1.462e-07	0.0037938	0.00215817	0.082	TRUE
		rs2729046	A	G	9.8642	2.1116	21.82	2.992e-06	-0.00135897	0.00213762	0.5	TRUE
		rs2881811	T	C	-7.9631	1.7437	20.86	4.952e-06	0.00412344	0.00232537	0.077	TRUE
		rs4076533	T	C	-6.9833	1.5226	21.04	4.507e-06	0.00248761	0.00211452	0.24	TRUE
		rs4445492	A	T	-7.9781	1.6772	22.63	1.967e-06	0.00208117	0.00230348	0.36	TRUE
		rs55818129	T	G	-14.3639	2.6487	29.41	5.863e-08	0.00679498	0.00329526	0.038	TRUE
		rs56078743	A	G	8.7318	1.7938	23.7	1.129e-06	0.00320459	0.00225738	0.15	TRUE
		rs573335	C	G	-17.3867	3.7726	21.24	4.051e-06	0.00410467	0.00349616	0.24	TRUE
		rs6748469	A	G	-7.1646	1.5467	21.46	3.617e-06	0.000495643	0.00215759	0.81	TRUE
		rs72943724	A	G	22.6173	4.9469	20.9	4.831e-06	-0.00592821	0.00528881	0.26	TRUE
		rs77836234	T	G	18.6432	3.7833	24.28	8.32e-07	-0.00812903	0.00431145	0.055	TRUE
		rs7996803	T	C	-8.3714	1.6934	24.44	7.676e-07	-0.000600301	0.00236891	0.79	TRUE
		rs8005394	C	G	10.339	2.2539	21.04	4.493e-06	0.000393257	0.00321041	0.89	TRUE
		rs80221693	T	C	25.5636	4.97	26.46	2.695e-07	0.000950037	0.00618009	0.87	TRUE
		rs80251886	A	T	19.6615	4.0208	23.91	1.009e-06	-0.00607573	0.00508433	0.23	TRUE
		rs8132524	T	C	-7.9677	1.6716	22.72	1.875e-06	-0.000128939	0.00230565	0.95	TRUE
SA_temporalpole	pork_overallfreq	rs10456045	A	G	2.3282	0.485	23.04	1.581e-06	-0.000672139	0.00229208	0.79	TRUE
		rs117374458	T	G	5.449	1.1906	20.95	4.722e-06	0.00311203	0.00526448	0.55	TRUE
		rs11799962	T	C	-2.1099	0.4515	21.84	2.965e-06	-0.00260438	0.00215017	0.23	TRUE
		rs138306593	C	G	12.5897	2.7038	21.68	3.219e-06	0.0085489	0.012989	0.49	TRUE
		rs17654027	A	G	2.6508	0.5557	22.75	1.838e-06	0.00397674	0.00256251	0.12	TRUE
		rs2139446	A	G	-2.5373	0.5165	24.13	8.985e-07	0.000796289	0.00248443	0.76	TRUE
		rs34215525	C	G	15.1186	3.2186	22.06	2.636e-06	-0.00853538	0.00779037	0.29	TRUE
		rs34333163	A	G	4.4245	0.8773	25.44	4.577e-07	0.00226674	0.00410908	0.61	TRUE
		rs41290297	T	C	7.4871	1.4724	25.86	3.675e-07	0.00438459	0.00767585	0.56	TRUE
		rs6038566	A	G	2.1399	0.4448	23.15	1.504e-06	0.00229406	0.00213298	0.29	TRUE
		rs62022294	A	G	8.5949	1.8171	22.37	2.246e-06	0.0112537	0.00822503	0.17	TRUE
		rs72815268	T	C	11.0114	2.3853	21.31	3.904e-06	0.00332719	0.00795373	0.67	TRUE
		rs72825143	T	C	-5.619	1.2003	21.91	2.849e-06	-0.00391455	0.00576466	0.5	TRUE
		rs72900536	C	G	5.3128	1.1489	21.38	3.763e-06	0.0150331	0.00516316	0.0035	TRUE
		rs80034305	T	G	6.2301	1.292	23.25	1.42e-06	-0.000952194	0.00581928	0.86	TRUE
THICK_cuneus	pork_overallfreq	rs12810533	A	G	0.0056	0.0012	21.78	1.18e-06	0.00208465	0.00243446	0.38	TRUE
		rs13107325	T	C	-0.0107	0.002	28.62	1.039e-07	-0.00397642	0.00401625	0.34	TRUE
		rs145305258	A	G	0.0152	0.0033	21.22	3.553e-06	0.0107884	0.00706916	0.12	TRUE
		rs148240261	A	G	-0.0209	0.0044	22.56	1.788e-06	-0.016121	0.00889355	0.074	TRUE
		rs187608611	C	G	0.0231	0.0047	24.16	9.269e-07	-0.000297355	0.00822402	0.96	TRUE
		rs627325	T	C	-0.0056	0.0012	21.78	2.708e-06	3.16448e-06	0.00247105	1	TRUE
		rs74826997	T	C	0.0093	0.0014	44.13	1.162e-10	-0.000345286	0.00319504	0.93	TRUE
		rs9511935	T	C	-0.0056	0.0012	21.78	1.607e-06	-0.00255379	0.00257383	0.33	TRUE
THICK_lateralorbitofrontal	pork_overallfreq	rs11734140	A	G	0.0053	0.0011	23.21	7.774e-07	-0.00143235	0.00213662	0.5	TRUE
		rs185561823	A	G	-0.0428	0.0085	25.35	5.482e-07	0.00621207	0.00965158	0.51	TRUE
		rs4318042	A	G	0.0052	0.0011	22.35	4.733e-06	-0.000841491	0.00214547	0.68	TRUE
		rs4890925	C	G	-0.0153	0.0033	21.5	4.191e-06	-0.000389401	0.00499448	0.96	TRUE
		rs62177670	T	G	-0.0059	0.0013	20.6	4.387e-06	0.00213249	0.00245552	0.38	TRUE
		rs7036912	C	G	-0.0192	0.0041	21.93	3.632e-06	-0.000690438	0.00828132	0.93	TRUE
		rs7869525	A	C	0.0053	0.0011	23.21	2.399e-06	-0.000884708	0.00212262	0.69	TRUE
THICK_postcentral	pork_overallfreq	rs10402696	T	C	0.0078	0.0017	21.05	4.336e-06	0.00195008	0.00447324	0.68	TRUE
		rs10498193	A	G	-0.0079	0.0015	27.74	2.002e-07	0.00418059	0.00401466	0.29	TRUE
		rs111353521	T	C	-0.0039	0.0008	23.77	4.053e-06	0.000372579	0.00211734	0.82	TRUE
		rs11634241	A	G	-0.0046	0.0008	33.06	1.874e-08	0.00090809	0.00220958	0.67	TRUE
		rs11664265	T	C	-0.0058	0.0012	23.36	2.347e-06	0.000279931	0.00337778	0.94	TRUE
		rs11771668	A	G	0.0047	0.0008	34.52	1.353e-08	-0.00164262	0.00220213	0.46	TRUE
		rs12807821	T	G	0.0115	0.0025	21.16	3.569e-06	-0.00451718	0.00460474	0.34	TRUE
		rs13203267	A	T	0.0114	0.0025	20.79	3.89e-06	0.00357218	0.00554384	0.52	TRUE
		rs17822045	T	C	0.0057	0.0009	40.11	3.079e-11	-0.00597404	0.00233435	0.01	TRUE
		rs2093620	A	C	0.0038	0.0008	22.56	1.666e-06	-0.000635912	0.00211193	0.76	TRUE
		rs228786	A	G	0.0069	0.0015	21.16	4.411e-06	-0.00604932	0.00403996	0.13	TRUE
		rs2403193	T	C	0.0045	0.0009	25	1.284e-07	-0.00173401	0.00224089	0.43	TRUE
		rs2489012	A	G	0.0042	0.0008	27.56	3.266e-07	-0.000519741	0.00214136	0.82	TRUE
		rs2802525	A	G	0.0053	0.001	28.09	1.62e-07	-0.00711333	0.00271261	0.0089	TRUE
		rs34772625	T	C	-0.0087	0.0019	20.97	4.71e-06	0.000660131	0.00507283	0.89	TRUE
		rs3736591	A	G	-0.0038	0.0008	22.56	2.183e-06	0.00473872	0.00213976	0.028	TRUE
		rs4924345	A	C	-0.0254	0.0015	286.74	1.904e-68	-0.00100238	0.00386655	0.81	TRUE
		rs62019481	A	G	-0.0065	0.0013	25	8.881e-07	0.00780183	0.00336697	0.02	TRUE
		rs62521928	A	G	0.0099	0.0021	22.22	2.703e-06	-0.00272005	0.00462521	0.57	TRUE
		rs6686188	A	G	0.0043	0.0009	22.83	3.452e-06	-0.000736057	0.0024966	0.77	TRUE
		rs7314728	C	G	-0.0044	0.001	19.36	4.032e-06	0.00116287	0.00224412	0.6	TRUE
		rs7716895	T	G	0.005	0.0011	20.66	3.235e-06	0.00280855	0.00292612	0.32	TRUE
		rs7752422	A	C	-0.004	0.0009	19.75	3.137e-06	0.000958045	0.00215973	0.65	TRUE
		rs880424	A	G	0.0049	0.001	24.01	4.152e-07	0.00564372	0.00263186	0.031	TRUE
SA_posteriorcingulate	rawveg_TBSperday	rs10507278	C	G	6.7963	1.3861	24.04	9.424e-07	0.00114135	0.00299597	0.7	TRUE
		rs10788109	A	G	6.088	1.2521	23.64	1.161e-06	0.000597715	0.00211721	0.77	TRUE
		rs11161942	T	C	8.498	1.5317	30.78	2.889e-08	-2.02778e-05	0.00311915	1	TRUE
		rs11598186	A	G	-5.1084	1.119	20.84	4.992e-06	-0.00510416	0.00230086	0.027	TRUE
		rs116655825	A	G	12.6925	2.4853	26.08	3.273e-07	0.00290184	0.00507487	0.54	TRUE
		rs12500639	T	C	11.1357	2.3252	22.94	1.674e-06	0.00253332	0.00488713	0.62	TRUE
		rs12764880	T	C	-4.7729	1.0219	21.81	3.003e-06	-0.00329616	0.0021288	0.12	TRUE
		rs13071264	T	C	-5.2041	1.1346	21.04	4.498e-06	-0.000203273	0.00228021	0.92	TRUE
		rs203026	A	G	9.586	2.0323	22.25	2.396e-06	-0.00142491	0.00439335	0.78	TRUE
		rs2110944	T	C	5.19	1.0361	25.09	5.47e-07	-2.62024e-05	0.00211786	1	TRUE
		rs2235704	T	C	7.5886	1.6377	21.47	3.593e-06	0.00333053	0.00359311	0.35	TRUE
		rs2709085	T	C	-6.274	1.3302	22.25	2.401e-06	-0.00197992	0.00273934	0.45	TRUE
		rs34107459	T	C	8.5736	1.8118	22.39	2.222e-06	0.0184876	0.00344775	8.2e-08	TRUE
		rs459506	C	G	-19.8432	4.2441	21.86	2.933e-06	-0.00196865	0.00873498	0.82	TRUE
		rs4957375	T	C	5.9447	1.2435	22.85	1.749e-06	0.0032127	0.00258021	0.23	TRUE
		rs61894520	T	C	8.2376	1.7552	22.03	2.69e-06	-0.00609381	0.00339094	0.073	TRUE
		rs62015774	A	G	-9.9602	2.1449	21.56	3.423e-06	-0.00900343	0.00401496	0.024	TRUE
		rs6438404	T	C	7.5972	1.6523	21.14	4.269e-06	0.00534371	0.00340978	0.11	TRUE
		rs77505740	A	G	7.023	1.4659	22.95	1.659e-06	-0.00258335	0.00264221	0.35	TRUE
		rs77667547	A	G	15.7641	3.3248	22.48	2.123e-06	0.00355009	0.00540255	0.52	TRUE
		rs77935092	T	C	16.2217	3.1308	26.85	2.202e-07	0.00204134	0.00684385	0.8	TRUE
		rs7973557	A	G	-5.4608	1.1349	23.15	1.496e-06	-0.00115525	0.00228968	0.61	TRUE
		rs8011815	A	G	5.5434	1.211	20.95	4.707e-06	5.15867e-05	0.00226478	1	TRUE
		rs892865	A	G	5.0152	1.0126	24.53	7.316e-07	0.00183824	0.00210882	0.38	TRUE
SA_superiorparietal	rawveg_TBSperday	rs10109434	A	C	21.5061	4.1459	26.91	2.134e-07	0.000351295	0.00221508	0.86	TRUE
		rs10780467	T	C	-18.5352	3.7419	24.54	7.29e-07	-0.00577606	0.00213381	0.0072	TRUE
		rs10960954	T	C	-17.9268	3.8447	21.74	3.121e-06	-0.000818298	0.00211952	0.66	TRUE
		rs11024299	T	C	-18.3682	3.9142	22.02	2.696e-06	0.00177308	0.00223877	0.41	TRUE
		rs11249061	T	C	-20.6628	4.5264	20.84	4.995e-06	-0.00423552	0.00257599	0.11	TRUE
		rs113533096	A	G	63.69	13.7081	21.59	3.382e-06	-0.00211048	0.00742387	0.78	TRUE
		rs113713107	A	G	-51.0572	10.5675	23.34	1.355e-06	0.00552768	0.00360521	0.12	TRUE
		rs114489117	A	T	-44.2062	6.342	48.59	3.16e-12	-0.0031396	0.00342283	0.36	TRUE
		rs115877304	T	C	78.5654	14.5638	29.1	6.869e-08	-0.000101924	0.00491111	0.99	TRUE
		rs117207394	A	G	-123.165	24.462	25.35	4.779e-07	-0.0102745	0.00743798	0.18	TRUE
		rs13144474	T	C	16.9424	3.6402	21.66	3.252e-06	0.0011819	0.0021078	0.59	TRUE
		rs150338935	T	G	-91.7293	19.8449	21.37	3.795e-06	-0.00252903	0.0107439	0.84	TRUE
		rs1884368	T	C	26.1045	4.6488	31.53	1.962e-08	-0.00550145	0.00252511	0.029	TRUE
		rs2033939	A	G	-62.5347	6.8638	83.01	8.18e-20	-0.00720441	0.00385368	0.066	TRUE
		rs2180127	T	C	-25.8731	4.7011	30.29	3.721e-08	-0.00483185	0.00280524	0.093	TRUE
		rs28661002	T	C	22.0244	4.2089	27.38	1.669e-07	0.00388961	0.00250437	0.12	TRUE
		rs3092030	A	G	20.8861	4.2567	24.08	9.264e-07	-0.00123267	0.00241767	0.63	TRUE
		rs4856278	A	G	21.9209	4.6016	22.69	1.9e-06	0.00959307	0.00249226	0.0001	TRUE
		rs6022786	A	G	19.7716	3.8485	26.39	2.784e-07	-0.000415564	0.00214236	0.81	TRUE
		rs6110037	A	G	-17.7324	3.8263	21.48	3.58e-06	-2.87614e-05	0.0021842	0.96	TRUE
		rs639016	C	G	-30.4472	4.7469	41.14	1.417e-10	-0.0029795	0.00264056	0.26	TRUE
		rs6592288	T	C	-16.9089	3.6733	21.19	4.161e-06	-0.00500053	0.00214889	0.019	TRUE
		rs68175985	A	G	-48.3662	5.7171	71.57	2.676e-17	-0.00353485	0.0028706	0.21	TRUE
		rs6858566	T	C	-36.4545	5.585	42.6	6.702e-11	0.00135691	0.00314187	0.63	TRUE
		rs738129	T	C	23.2244	5.0814	20.89	4.866e-06	0.00112576	0.00269099	0.7	TRUE
		rs7713330	A	G	22.9165	4.7887	22.9	1.705e-06	-0.00240978	0.00257543	0.34	TRUE
		rs77772401	T	C	-90.8475	19.5021	21.7	3.188e-06	-0.020265	0.00795329	0.011	TRUE
		rs7980991	A	C	-28.9916	4.6936	38.15	6.54e-10	-0.00413662	0.00251351	0.1	TRUE
SA_isthmuscingulate	tea_cupsperday	rs114625639	A	G	-15.7477	3.2566	23.38	1.327e-06	0.00969871	0.00663807	0.16	TRUE
		rs115328707	T	C	23.1562	4.6883	24.4	7.848e-07	-0.0223034	0.00688368	0.0011	TRUE
		rs11638702	T	G	10.5123	2.1871	23.1	1.536e-06	-0.00882222	0.00397994	0.028	TRUE
		rs11681167	T	C	-6.9544	1.0438	44.39	2.685e-11	0.0062876	0.00211806	0.0033	TRUE
		rs116944415	T	C	18.0191	3.7597	22.97	1.645e-06	-0.0108777	0.00609179	0.073	TRUE
		rs12420437	C	G	15.8408	3.4309	21.32	3.892e-06	-0.00519427	0.00546235	0.38	TRUE
		rs12616022	A	T	6.239	1.1804	27.94	1.253e-07	-0.00118722	0.00230803	0.6	TRUE
		rs12768414	A	G	8.5851	1.8803	20.85	4.975e-06	-7.36134e-05	0.00370206	0.99	TRUE
		rs16843226	A	G	-6.3746	1.2823	24.71	6.649e-07	0.00173149	0.00266153	0.49	TRUE
		rs2018523	A	G	-5.5869	1.1835	22.28	2.353e-06	0.00420259	0.00213262	0.038	TRUE
		rs2117028	A	G	5.7013	1.1839	23.19	1.467e-06	-0.00358401	0.00217135	0.097	TRUE
		rs4296251	T	C	-6.2768	1.3537	21.5	3.538e-06	0.0023692	0.00265188	0.42	TRUE
		rs4341513	T	C	5.9075	1.1177	27.94	1.254e-07	0.00386696	0.00210489	0.077	TRUE
		rs62117470	A	G	7.3021	1.5066	23.49	1.255e-06	-0.00371885	0.00279179	0.2	TRUE
		rs6735051	A	G	-5.0339	1.0497	23	1.622e-06	-0.00143094	0.00213277	0.52	TRUE
		rs7134686	A	G	-5.9041	1.1372	26.95	2.08e-07	0.00149797	0.00219097	0.48	TRUE
		rs75107653	A	G	17.1994	3.7099	21.49	3.551e-06	0.00688302	0.00719175	0.34	TRUE
		rs78156452	T	C	-5.7929	1.2521	21.4	3.717e-06	-0.00525123	0.00255143	0.044	TRUE
		rs9291875	T	C	5.034	1.0784	21.79	3.043e-06	0.000316441	0.00220897	0.94	TRUE
		rs9516557	A	G	5.6748	1.1533	24.21	8.63e-07	-0.00107239	0.00231377	0.67	TRUE
SA_lateraloccipital	tea_cupsperday	rs10011838	A	G	-18.9568	3.7851	25.08	5.492e-07	0.00152333	0.0023375	0.48	TRUE
		rs10951675	A	G	-24.9732	5.1542	23.48	1.265e-06	0.0059424	0.00321653	0.067	TRUE
		rs1953329	A	G	-16.2459	3.4271	22.47	2.133e-06	-0.00222369	0.00210913	0.25	TRUE
		rs1975417	A	C	-18.2754	3.7074	24.3	8.249e-07	0.00427016	0.00226991	0.061	TRUE
		rs199502	A	G	-21.1681	4.274	24.53	7.317e-07	0.00135463	0.00256608	0.6	TRUE
		rs2353397	T	C	-16.7388	3.6171	21.42	3.697e-06	0.00121247	0.00210016	0.58	TRUE
		rs28496034	C	G	26.1651	3.6684	50.87	9.854e-13	-0.000625355	0.00223911	0.84	TRUE
		rs3020595	C	G	20.2731	4.1437	23.94	9.953e-07	-0.00133084	0.00251697	0.6	TRUE
		rs34004794	T	G	-20.6542	4.4277	21.76	3.09e-06	0.0273753	0.00256969	2.5e-26	TRUE
		rs3757149	T	C	-24.1791	5.2024	21.6	3.356e-06	-0.000940229	0.0032549	0.76	TRUE
		rs4857716	T	C	-18.011	3.6174	24.79	6.394e-07	-0.00110234	0.00213527	0.6	TRUE
		rs56007616	A	G	25.6022	5.2877	23.44	1.286e-06	-0.00540529	0.0033086	0.12	TRUE
		rs6599389	A	G	-35.2857	7.3725	22.91	1.7e-06	0.00447926	0.00404733	0.26	TRUE
		rs6736239	T	C	21.3006	4.4425	22.99	1.629e-06	0.00238273	0.00286346	0.41	TRUE
		rs7099229	A	G	-18.4919	3.9182	22.27	2.365e-06	0.00256345	0.00236884	0.28	TRUE
		rs72971190	A	G	18.5328	3.9895	21.58	3.395e-06	-0.00734454	0.00249049	0.0028	TRUE
		rs74826997	T	C	40.5802	5.1264	62.66	2.455e-15	-0.00195043	0.00317501	0.55	TRUE
		rs8076087	A	G	-17.7322	3.7189	22.74	1.86e-06	0.0034784	0.00227248	0.12	TRUE
		rs9456934	T	G	23.8156	5.0707	22.06	2.644e-06	0.000940775	0.00317305	0.76	TRUE
		rs9814707	A	G	-21.2355	4.3842	23.46	1.275e-06	0.000926026	0.00280671	0.73	TRUE
THICK_caudalanteriorcingulate	tea_cupsperday	rs10518920	A	C	0.0132	0.0029	20.72	4.066e-06	-0.000146218	0.00365347	0.92	TRUE
		rs117174116	A	G	-0.0436	0.0085	26.31	2.944e-07	-0.0212165	0.00718701	0.0038	TRUE
		rs138502605	C	G	-0.0291	0.0057	26.06	3.677e-07	-0.00254037	0.006314	0.72	TRUE
		rs140220606	A	C	-0.0179	0.0039	21.07	3.59e-06	0.00506684	0.00462016	0.27	TRUE
		rs17184754	T	C	0.0281	0.0061	21.22	4.804e-06	0.00435228	0.00608848	0.45	TRUE
		rs2060060	A	G	-0.0082	0.0018	20.75	3.497e-06	-0.000828064	0.00210406	0.7	TRUE
		rs722395	T	C	-0.0087	0.0018	23.36	2.476e-06	-0.00404545	0.00216241	0.064	TRUE
		rs73528979	A	G	0.012	0.0025	23.04	1.925e-06	-0.00368341	0.00300464	0.23	TRUE
		rs77863985	T	G	0.0518	0.0103	25.29	4.811e-07	0.0200907	0.00753753	0.0079	TRUE
		rs9929528	T	G	0.0175	0.0034	26.49	1.941e-07	0.000656141	0.0021208	0.77	TRUE
THICK_medialorbitofrontal	tea_cupsperday	rs10016993	A	G	-0.0065	0.0013	25	4.542e-07	0.00273	0.00224958	0.22	TRUE
		rs116581863	A	T	0.019	0.0041	21.48	4.104e-06	-0.012178	0.00610273	0.04	TRUE
		rs117509702	A	G	0.0314	0.0063	24.84	6.877e-07	0.00332396	0.00803924	0.75	TRUE
		rs12566773	T	C	-0.0102	0.0022	21.5	3.828e-06	0.00345943	0.00250387	0.19	TRUE
		rs2073205	A	C	-0.0099	0.0019	27.15	1.459e-07	0.00443318	0.00251157	0.081	TRUE
		rs207879	A	T	0.0073	0.0016	20.82	2.815e-06	0.00419891	0.00264504	0.11	TRUE
		rs2340727	A	G	0.0079	0.0017	21.6	3.552e-06	-0.00203592	0.00285755	0.53	TRUE
		rs28434344	A	G	0.0061	0.0013	22.02	1.111e-06	-0.00395343	0.00217942	0.068	TRUE
		rs2934193	T	C	0.0071	0.0015	22.4	3.665e-06	-0.000698429	0.00266396	0.83	TRUE
		rs34367611	A	G	-0.0108	0.0024	20.25	4.213e-06	2.44707e-06	0.00268279	0.93	TRUE
		rs5997163	T	C	-0.0072	0.0015	23.04	3.084e-06	0.00423127	0.00261766	0.1	TRUE
		rs78042671	T	C	0.0133	0.0028	22.56	1.413e-06	-0.00916288	0.00363707	0.011	TRUE
		rs79419851	A	G	0.0125	0.0027	21.43	3.421e-06	0.00146646	0.00433785	0.75	TRUE
		rs9638780	A	G	-0.0062	0.0013	22.75	4.414e-06	0.00564521	0.00228277	0.012	TRUE
THICK_precentral	tea_cupsperday	rs10445105	T	G	0.0144	0.0029	24.66	5.543e-07	0.00770664	0.00475579	0.12	TRUE
		rs11063880	A	G	0.0041	0.0009	20.75	3.887e-06	0.000626627	0.0022575	0.76	TRUE
		rs11158250	A	G	0.0054	0.001	29.16	2.401e-07	0.00155757	0.0026367	0.54	TRUE
		rs112216293	A	C	0.0116	0.0025	21.53	4.379e-06	-0.00011932	0.00652185	0.99	TRUE
		rs1880694	A	G	-0.0071	0.0013	29.83	1.401e-08	0.0014891	0.00314313	0.63	TRUE
		rs2298485	C	G	-0.0043	0.0009	22.83	1.765e-06	0.000747877	0.00214445	0.76	TRUE
		rs2523557	A	G	-0.0074	0.0014	27.94	2.042e-07	-0.00653983	0.00215727	0.0026	TRUE
		rs4452100	A	C	-0.0089	0.0019	21.94	2.747e-06	-0.00563933	0.00471182	0.2	TRUE
		rs4724413	T	C	0.0045	0.0009	25	1.375e-06	-0.00305605	0.00224084	0.16	TRUE
		rs57383320	T	C	-0.004	0.0009	19.75	2.957e-06	-0.00271698	0.00214607	0.22	TRUE
		rs60892631	T	C	-0.012	0.0026	21.3	3.64e-06	-0.00206627	0.00596043	0.76	TRUE
		rs62400564	T	C	0.004	0.0009	19.75	3.286e-06	0.00903887	0.00216129	3e-05	TRUE
		rs79040955	T	C	-0.0054	0.0012	20.25	3.685e-06	-0.000706261	0.00294197	0.85	TRUE
		rs998852	A	C	0.0049	0.001	24.01	5.925e-07	0.00280521	0.00225573	0.23	TRUE
SA_posteriorcingulate	water_glassesperday	rs10507278	C	G	6.7963	1.3861	24.04	9.424e-07	0.0065698	0.0029713	0.027	TRUE
		rs10788109	A	G	6.088	1.2521	23.64	1.161e-06	0.0013614	0.00209946	0.54	TRUE
		rs11161942	T	C	8.498	1.5317	30.78	2.889e-08	0.0051248	0.00309225	0.11	TRUE
		rs11598186	A	G	-5.1084	1.119	20.84	4.992e-06	0.00151109	0.00228181	0.51	TRUE
		rs116655825	A	G	12.6925	2.4853	26.08	3.273e-07	-0.00134519	0.00502531	0.81	TRUE
		rs12500639	T	C	11.1357	2.3252	22.94	1.674e-06	0.00455983	0.00484698	0.43	TRUE
		rs12764880	T	C	-4.7729	1.0219	21.81	3.003e-06	0.000407621	0.0021109	0.79	TRUE
		rs13071264	T	C	-5.2041	1.1346	21.04	4.498e-06	-0.00312397	0.00226062	0.18	TRUE
		rs203026	A	G	9.586	2.0323	22.25	2.396e-06	0.00447512	0.00435927	0.35	TRUE
		rs2110944	T	C	5.19	1.0361	25.09	5.47e-07	0.00433273	0.00209899	0.03	TRUE
		rs2235704	T	C	7.5886	1.6377	21.47	3.593e-06	0.00583882	0.00356421	0.087	TRUE
		rs2709085	T	C	-6.274	1.3302	22.25	2.401e-06	0.00468425	0.00271583	0.081	TRUE
		rs34107459	T	C	8.5736	1.8118	22.39	2.222e-06	0.00860433	0.00341956	0.0099	TRUE
		rs459506	C	G	-19.8432	4.2441	21.86	2.933e-06	0.00832084	0.00865715	0.32	TRUE
		rs4957375	T	C	5.9447	1.2435	22.85	1.749e-06	-0.000831069	0.00255839	0.67	TRUE
		rs61894520	T	C	8.2376	1.7552	22.03	2.69e-06	-0.00284894	0.00336274	0.4	TRUE
		rs62015774	A	G	-9.9602	2.1449	21.56	3.423e-06	0.00368946	0.00398076	0.34	TRUE
		rs6438404	T	C	7.5972	1.6523	21.14	4.269e-06	0.0109208	0.00338152	0.0017	TRUE
		rs77505740	A	G	7.023	1.4659	22.95	1.659e-06	0.00186178	0.00262107	0.49	TRUE
		rs77667547	A	G	15.7641	3.3248	22.48	2.123e-06	-0.000545433	0.00535822	0.87	TRUE
		rs77935092	T	C	16.2217	3.1308	26.85	2.202e-07	0.0032323	0.00678748	0.66	TRUE
		rs7973557	A	G	-5.4608	1.1349	23.15	1.496e-06	-0.00450273	0.00227085	0.043	TRUE
		rs8011815	A	G	5.5434	1.211	20.95	4.707e-06	0.000533683	0.00224655	0.77	TRUE
		rs892865	A	G	5.0152	1.0126	24.53	7.316e-07	0.000841946	0.00209008	0.71	TRUE
SA_superiortemporal	water_glassesperday	rs10187408	A	G	10.4904	2.2697	21.36	3.802e-06	-0.00253742	0.00223032	0.26	TRUE
		rs10999626	A	G	-10.6155	2.3217	20.91	4.822e-06	-0.00300702	0.00221867	0.19	TRUE
		rs112330851	T	G	-12.592	2.6149	23.19	1.468e-06	0.00250354	0.00248882	0.31	TRUE
		rs13011264	A	G	-13.6271	2.3342	34.08	5.279e-09	0.0032441	0.00231659	0.16	TRUE
		rs142857890	A	G	-16.5517	3.6011	21.13	4.3e-06	0.00541768	0.00271146	0.044	TRUE
		rs17209296	T	C	-12.8021	2.6883	22.68	1.915e-06	0.00146371	0.00250139	0.55	TRUE
		rs1892275	T	C	-20.8015	4.5171	21.21	4.124e-06	0.00186881	0.0037547	0.56	TRUE
		rs2180127	T	C	14.2079	2.7612	26.48	2.666e-07	-0.00611118	0.00278208	0.032	TRUE
		rs2280696	A	T	21.7685	4.5042	23.36	1.345e-06	0.00300424	0.00453536	0.49	TRUE
		rs35186889	T	C	-61.7907	12.825	23.21	1.45e-06	0.0158187	0.00781592	0.045	TRUE
		rs35852936	A	G	25.2827	5.4595	21.45	3.64e-06	-0.0122949	0.00488207	0.013	TRUE
		rs4274112	A	G	11.1905	2.2609	24.5	7.433e-07	0.00933609	0.00218992	2.1e-05	TRUE
		rs4690466	A	C	-13.6383	2.5475	28.66	8.627e-08	0.000557029	0.00240941	0.8	TRUE
		rs56002885	A	G	-12.2363	2.6521	21.29	3.952e-06	0.00414823	0.00256122	0.1	TRUE
		rs56134400	C	G	10.4198	2.231	21.81	3.005e-06	-0.00333367	0.00213162	0.13	TRUE
		rs62135444	T	C	12.3202	2.2157	30.92	2.69e-08	-0.00518378	0.00215837	0.017	TRUE
		rs62445090	A	G	-30.1941	6.368	22.48	2.121e-06	-0.00326528	0.0055963	0.58	TRUE
		rs6767583	C	G	-10.0134	2.1882	20.94	4.739e-06	-0.0056933	0.00210748	0.0068	FALSE
		rs7237687	T	G	-17.7105	3.5939	24.28	8.312e-07	-0.000846664	0.00327847	0.84	TRUE
		rs7874052	A	T	12.1333	2.2597	28.83	7.899e-08	0.000443165	0.00222608	0.85	TRUE
		rs800902	T	C	-10.397	2.1774	22.8	1.798e-06	-0.00185409	0.00211929	0.42	TRUE
		rs920047	A	G	14.734	2.2774	41.86	9.823e-11	-0.0058022	0.0021386	0.008	TRUE
		rs9409515	A	G	-17.7705	3.8613	21.18	4.181e-06	-0.00220093	0.00379256	0.56	TRUE
THICK_frontalpole	water_glassesperday	rs116321207	A	G	-0.03	0.0063	22.68	2.19e-06	-0.00111779	0.00477423	0.85	TRUE
		rs12831299	A	G	-0.0111	0.0024	21.39	3.278e-06	-0.00267157	0.00211193	0.2	TRUE
		rs489160	T	C	0.0119	0.0026	20.95	3.956e-06	0.00142915	0.00262196	0.58	TRUE
		rs56023709	A	C	0.013	0.0021	38.32	3.526e-10	-0.000471355	0.00215334	0.82	TRUE
		rs58865520	A	G	-0.0182	0.0036	25.56	5.53e-07	-0.00768249	0.00368067	0.038	TRUE
		rs62109685	A	G	-0.0231	0.0049	22.22	2.013e-06	-0.00867603	0.00478848	0.071	TRUE
		rs6736489	T	C	0.0211	0.0043	24.08	1.144e-06	-0.00199324	0.00459586	0.67	TRUE
		rs7044811	C	G	0.0152	0.0031	24.04	6.253e-07	-0.000148855	0.00344753	0.98	TRUE
		rs7112030	A	G	-0.0095	0.0021	20.46	3.911e-06	0.000604677	0.00215368	0.78	TRUE
		rs79421562	A	G	-0.0541	0.0114	22.52	2.227e-06	-0.00207587	0.00665851	0.73	TRUE
		rs79958963	A	G	0.0433	0.0092	22.15	2.613e-06	0.00613713	0.00944602	0.53	TRUE
		rs8036595	T	G	0.012	0.0026	21.3	2.945e-06	0.000546996	0.0022511	0.76	TRUE
THICK_inferiorparietal	water_glassesperday	rs10198353	A	G	0.0035	0.0007	25	2.321e-06	0.0012104	0.00216858	0.57	TRUE
		rs10741651	T	G	-0.0035	0.0007	25	3.717e-07	-0.00197153	0.00211369	0.34	TRUE
		rs137879891	A	G	-0.004	0.0009	19.75	3.3e-06	1.98748e-05	0.00213989	0.96	TRUE
		rs148015643	T	C	0.0216	0.0045	23.04	1.883e-06	-0.00141822	0.0104809	0.92	TRUE
		rs1807530	A	G	0.0037	0.0008	21.39	2.938e-06	-0.0015498	0.00215246	0.49	TRUE
		rs2468943	T	G	0.0034	0.0007	23.59	2.537e-06	-0.00298758	0.00221428	0.17	TRUE
		rs272561	T	C	-0.0038	0.0008	22.56	2.174e-06	0.00102594	0.00232371	0.65	TRUE
		rs34183391	A	G	-0.0136	0.0029	21.99	2.619e-06	0.0107435	0.00764648	0.19	TRUE
		rs3791827	C	G	-0.0039	0.0008	23.77	2.744e-07	0.000796604	0.00229168	0.7	TRUE
		rs4716058	T	C	0.0048	0.001	23.04	2.341e-06	0.00088619	0.00329545	0.88	TRUE
		rs58955905	A	G	-0.0067	0.0014	22.9	2.278e-06	0.0028432	0.00386199	0.49	TRUE
		rs6980241	T	C	0.0032	0.0007	20.9	2.292e-06	-0.00487584	0.00209054	0.023	TRUE
		rs965923	A	C	0.014	0.0029	23.31	1.906e-06	-0.00894403	0.00802043	0.25	TRUE
SA_frontalpole	Carbohydrate	rs10406632	T	C	1.7	0.3533	23.15	1.501e-06	0.00147	0.6567	0.0033	TRUE
		rs113050298	T	C	-3.0819	0.6493	22.53	2.067e-06	-0.00551	0.3865	0.00636	TRUE
		rs12064798	A	T	-2.2111	0.4787	21.33	3.851e-06	0.00307	0.5337	0.00493	TRUE
		rs1561271	A	G	-1.3215	0.2802	22.24	2.407e-06	-0.00301	0.2847	0.00282	TRUE
		rs1914726	T	G	1.7495	0.3693	22.44	2.169e-06	0.00069	0.8402	0.00342	TRUE
		rs4689322	A	G	1.3623	0.2893	22.17	2.482e-06	-0.00044	0.8799	0.00291	TRUE
		rs58127279	T	C	-5.1893	1.1243	21.3	3.922e-06	0.00017	0.9817	0.00748	TRUE
		rs61731943	T	C	-5.8352	1.1882	24.12	9.054e-07	-0.02261	0.01573	0.00936	TRUE
		rs61948049	T	C	-4.8614	1.0332	22.14	2.538e-06	-0.00086	0.9169	0.00829	TRUE
		rs9327072	A	G	1.3538	0.2961	20.9	4.845e-06	0.00359	0.2273	0.00298	TRUE
THICK_caudalanteriorcingulate	Carbohydrate	rs10518920	A	C	0.0132	0.0029	20.72	4.066e-06	-0.00136	0.7733	0.00472	TRUE
		rs117174116	A	G	-0.0436	0.0085	26.31	2.944e-07	-0.01098	0.2949	0.01049	TRUE
		rs138502605	C	G	-0.0291	0.0057	26.06	3.677e-07	-0.00707	0.4245	0.00885	TRUE
		rs140220606	A	C	-0.0179	0.0039	21.07	3.59e-06	-0.00602	0.3061	0.00588	TRUE
		rs17184754	T	C	0.0281	0.0061	21.22	4.804e-06	0.02411	0.005189	0.00863	TRUE
		rs2060060	A	G	-0.0082	0.0018	20.75	3.497e-06	-0.00169	0.5397	0.00275	TRUE
		rs722395	T	C	-0.0087	0.0018	23.36	2.476e-06	-0.00312	0.2862	0.00292	TRUE
		rs73528979	A	G	0.012	0.0025	23.04	1.925e-06	0.0054	0.1696	0.00393	TRUE
		rs77863985	T	G	0.0518	0.0103	25.29	4.811e-07	0.00511	0.6512	0.01131	TRUE
THICK_cuneus	Carbohydrate	rs12810533	A	G	0.0056	0.0012	21.78	1.18e-06	0.00251	0.4796	0.00355	TRUE
		rs13107325	T	C	-0.0107	0.002	28.62	1.039e-07	0.01776	0.001031	0.00541	TRUE
		rs145305258	A	G	0.0152	0.0033	21.22	3.553e-06	0.00356	0.716	0.00978	TRUE
		rs148240261	A	G	-0.0209	0.0044	22.56	1.788e-06	0.02112	0.09493	0.01265	TRUE
		rs187608611	C	G	0.0231	0.0047	24.16	9.269e-07	0.0012	0.9191	0.01179	TRUE
		rs627325	T	C	-0.0056	0.0012	21.78	2.708e-06	0.00188	0.5651	0.00328	TRUE
		rs74826997	T	C	0.0093	0.0014	44.13	1.162e-10	-0.01279	0.002102	0.00416	TRUE
		rs9511935	T	C	-0.0056	0.0012	21.78	1.607e-06	0.00148	0.6609	0.00336	TRUE
THICK_inferiortemporal	Carbohydrate	rs12121292	T	C	-0.0056	0.0012	21.78	2.718e-06	0.00054	0.8636	0.00314	TRUE
		rs13069343	A	T	0.0064	0.0013	24.24	6.674e-07	-0.00275	0.4313	0.00349	TRUE
		rs142523826	A	G	-0.0177	0.0038	21.7	4.222e-06	0.02844	0.006578	0.01047	TRUE
		rs143504301	T	G	0.0378	0.0082	21.25	3.944e-06	-0.02268	0.145	0.01556	TRUE
		rs149495718	A	G	-0.025	0.0051	24.03	1.004e-06	0.02595	0.02953	0.01193	TRUE
		rs150909965	A	C	-0.0287	0.0063	20.75	4.395e-06	-0.0074	0.6234	0.01508	TRUE
		rs35625067	A	G	-0.0304	0.0066	21.22	3.589e-06	0.01255	0.3006	0.01213	TRUE
		rs62305730	A	C	-0.0063	0.0013	23.49	2.891e-06	0.00325	0.3747	0.00366	TRUE
		rs6545675	A	G	0.0055	0.0012	21.01	3.462e-06	-0.00138	0.6788	0.00334	TRUE
		rs6684777	A	T	-0.0184	0.004	21.16	3.441e-06	-0.00855	0.3032	0.0083	TRUE
		rs737280	T	C	0.0054	0.0011	24.1	1.615e-06	0.00434	0.1569	0.00306	TRUE
		rs751312	T	C	0.0049	0.001	24.01	2.626e-06	0.00036	0.9017	0.00287	TRUE
		rs7578279	T	C	-0.0055	0.0011	25	7.93e-07	0.00136	0.6388	0.0029	TRUE
		rs77061978	A	T	-0.0104	0.0022	22.35	1.549e-06	0.00412	0.4636	0.00562	TRUE
		rs9594346	A	T	0.0118	0.0025	22.28	3.503e-06	-0.01368	0.02663	0.00617	TRUE
THICK_parsorbitalis	Carbohydrate	rs10275666	T	C	0.0096	0.002	23.04	1.953e-06	0.00132	0.7514	0.00416	TRUE
		rs10871753	T	G	-0.0065	0.0014	21.56	2.581e-06	-0.00158	0.5715	0.0028	TRUE
		rs113846260	A	C	-0.0315	0.0065	23.49	1.144e-06	0.01277	0.1946	0.00985	TRUE
		rs116865485	A	G	-0.017	0.0037	21.11	3.503e-06	0.00943	0.1849	0.00712	TRUE
		rs11914798	C	G	-0.0165	0.0034	23.55	1.486e-06	0.01066	0.1103	0.00667	TRUE
		rs147424290	C	G	-0.051	0.011	21.5	3.781e-06	0.02607	0.09356	0.01554	TRUE
		rs3928516	T	G	0.0132	0.0028	22.22	2.933e-06	-0.00932	0.01034	0.00364	TRUE
		rs4785955	T	G	-0.0084	0.0017	24.42	6.389e-07	-0.00078	0.8188	0.0034	TRUE
		rs4810349	T	C	0.0068	0.0014	23.59	4.91e-07	0.00364	0.1871	0.00276	TRUE
		rs76881621	T	C	-0.0192	0.0042	20.9	4.777e-06	0.00607	0.4688	0.00838	TRUE
		rs7930227	A	G	-0.0068	0.0014	23.59	2.065e-06	-0.00014	0.9625	0.00288	TRUE
THICK_temporalpole	Carbohydrate	rs113754989	T	G	0.0569	0.0123	21.4	3.89e-06	-0.00401	0.7924	0.01523	TRUE
		rs11641011	T	C	0.0113	0.0025	20.43	4.841e-06	0.00323	0.243	0.00276	TRUE
		rs139607657	T	C	-0.0548	0.0119	21.21	4.366e-06	-0.00691	0.474	0.00965	TRUE
		rs150930743	A	G	0.0783	0.0166	22.25	2.513e-06	0.01752	0.3882	0.0203	TRUE
		rs62572656	A	G	-0.0182	0.0038	22.94	2.193e-06	-0.00565	0.1953	0.00436	TRUE
		rs73543117	T	C	-0.0404	0.0086	22.07	2.406e-06	-0.00183	0.8443	0.00932	TRUE
SA_entorhinal	Fat	rs11746026	A	C	-3.0005	0.6226	23.23	1.443e-06	-0.0001	0.9735	0.00289	TRUE
		rs12375318	A	G	-3.8632	0.7889	23.98	9.722e-07	0.00386	0.2829	0.0036	TRUE
		rs12524607	A	G	-3.4634	0.7035	24.24	8.526e-07	0.00614	0.06342	0.00331	TRUE
		rs13157759	A	T	3.3072	0.7232	20.91	4.809e-06	-0.003	0.3685	0.00334	TRUE
		rs17774221	A	G	-7.2879	1.5821	21.22	4.097e-06	0.00421	0.5811	0.00762	TRUE
		rs247786	A	G	3.8127	0.805	22.43	2.177e-06	-0.00042	0.9078	0.00365	TRUE
		rs2484529	T	C	3.7404	0.8155	21.04	4.508e-06	-0.00042	0.9042	0.00352	TRUE
		rs35004829	A	G	-3.3529	0.7073	22.47	2.132e-06	-0.00294	0.3633	0.00323	TRUE
		rs4408506	T	C	3.6505	0.7909	21.3	3.914e-06	0.00179	0.6278	0.0037	TRUE
		rs4784817	T	C	-3.1953	0.6437	24.64	6.901e-07	0.00268	0.3717	0.003	TRUE
		rs6651355	A	C	3.7131	0.7622	23.73	1.106e-06	-0.00152	0.6764	0.00364	TRUE
		rs7173047	A	T	4.0095	0.7573	28.03	1.192e-07	-0.00037	0.9154	0.00345	TRUE
		rs73504994	A	G	6.551	1.4267	21.08	4.397e-06	-0.0027	0.645	0.00585	TRUE
		rs76581059	T	G	-10.6656	2.2863	21.76	3.087e-06	0.01054	0.3333	0.0109	TRUE
SA_rostralmiddlefrontal	Fat	rs10053484	T	C	25.4632	4.1728	37.24	1.047e-09	-0.00061	0.8441	0.00309	TRUE
		rs10139160	T	C	18.0581	3.7703	22.94	1.671e-06	-0.00803	0.003586	0.00276	TRUE
		rs10139287	A	C	-18.0914	3.8349	22.26	2.387e-06	0.00028	0.9213	0.00285	TRUE
		rs10750766	A	C	24.9726	4.1145	36.84	1.284e-09	-0.00219	0.4696	0.00303	TRUE
		rs11580768	T	C	-20.2324	4.1871	23.35	1.351e-06	0.00527	0.06328	0.00284	TRUE
		rs11634461	T	C	-39.3504	8.4382	21.75	3.111e-06	0.00209	0.7306	0.00608	TRUE
		rs1165645	A	G	21.0012	3.9948	27.64	1.463e-07	-9e-05	0.9742	0.0028	TRUE
		rs117956519	A	G	121.107	25.5874	22.4	2.211e-06	0.01001	0.4478	0.01319	TRUE
		rs11885014	A	G	-19.7109	4.1629	22.42	2.192e-06	-5e-05	0.9883	0.00312	TRUE
		rs12198419	A	T	-18.4295	3.9967	21.26	4.003e-06	-0.00244	0.4113	0.00297	TRUE
		rs13198298	T	C	-29.7367	6.3896	21.66	3.257e-06	0.00444	0.3473	0.00472	TRUE
		rs1440802	T	C	31.6617	6.648	22.68	1.912e-06	0.00343	0.4738	0.00479	TRUE
		rs145019618	A	G	-106.587	22.277	22.89	1.713e-06	0.00544	0.781	0.01956	TRUE
		rs149990818	T	C	167.382	32.637	26.3	2.919e-07	-0.01279	0.4378	0.01648	TRUE
		rs2279829	T	C	23.0514	4.546	25.71	3.963e-07	0.00377	0.2604	0.00335	TRUE
		rs2478219	T	C	-21.4069	4.6399	21.29	3.956e-06	0.00144	0.6739	0.00341	TRUE
		rs35612915	A	G	-26.6637	4.4536	35.84	2.138e-09	0.00322	0.3149	0.00321	TRUE
		rs4509205	T	C	-20.1232	3.8918	26.74	2.333e-07	0.00201	0.4854	0.00288	TRUE
		rs4656379	A	G	29.0667	6.3322	21.07	4.427e-06	-0.01443	0.002021	0.00467	TRUE
		rs4676588	T	C	19.0463	4.116	21.41	3.703e-06	0.00296	0.3363	0.00308	TRUE
		rs4772268	A	G	-20.9104	4.003	27.29	1.754e-07	0.00077	0.801	0.00306	TRUE
		rs6134521	A	C	28.1237	5.8794	22.88	1.723e-06	-0.00517	0.1623	0.0037	TRUE
		rs6709302	A	G	-19.4572	4.133	22.16	2.505e-06	0.00046	0.8765	0.00298	TRUE
		rs674369	A	G	-17.7444	3.7171	22.79	1.809e-06	-0.00064	0.8157	0.00275	TRUE
		rs6830285	T	C	29.9955	5.9188	25.68	4.024e-07	-0.00425	0.3506	0.00456	TRUE
		rs7529537	T	C	35.0762	6.423	29.82	4.733e-08	-0.00145	0.7295	0.0042	TRUE
		rs823114	A	G	19.1663	3.7295	26.41	2.761e-07	-0.00072	0.7947	0.00277	TRUE
		rs9367415	A	C	19.7768	3.9299	25.32	4.843e-07	-0.00658	0.02235	0.00288	TRUE
THICK_middletemporal	Fat	rs10188826	A	G	-0.0053	0.0011	23.21	2.297e-06	0.00131	0.6945	0.00334	TRUE
		rs11791516	A	C	-0.0262	0.0055	22.69	1.716e-06	-0.01662	0.2432	0.01424	TRUE
		rs12346905	T	C	-0.0048	0.0011	19.04	4.331e-06	-0.00869	0.004422	0.00305	TRUE
		rs1281414	A	G	-0.0067	0.0012	31.17	1.585e-08	-0.00199	0.5716	0.00351	TRUE
		rs150809692	C	G	0.0164	0.0033	24.7	8.168e-07	0.0015	0.8548	0.00821	TRUE
		rs160460	A	G	-0.0059	0.001	34.81	6.065e-10	-0.00297	0.2898	0.00281	TRUE
		rs180778842	A	G	-0.0212	0.0043	24.31	7.324e-07	-0.0132	0.3207	0.01329	TRUE
		rs2648120	T	C	0.0044	0.0009	23.9	3.655e-06	0.00068	0.8048	0.00276	TRUE
		rs6103815	A	G	0.0062	0.0013	22.75	3.771e-06	-7e-05	0.9837	0.00355	TRUE
		rs982096	A	G	-0.0053	0.0011	23.21	2.025e-06	-0.00231	0.4791	0.00326	TRUE
THICK_parsorbitalis	Protein	rs10275666	T	C	0.0096	0.002	23.04	1.953e-06	-0.0044	0.29	0.00416	TRUE
		rs10871753	T	G	-0.0065	0.0014	21.56	2.581e-06	-0.00452	0.1057	0.0028	TRUE
		rs113846260	A	C	-0.0315	0.0065	23.49	1.144e-06	-0.00191	0.846	0.00985	TRUE
		rs116865485	A	G	-0.017	0.0037	21.11	3.503e-06	-0.00191	0.789	0.00712	TRUE
		rs11914798	C	G	-0.0165	0.0034	23.55	1.486e-06	-0.01071	0.1086	0.00667	TRUE
		rs147424290	C	G	-0.051	0.011	21.5	3.781e-06	-0.01292	0.406	0.01554	TRUE
		rs3928516	T	G	0.0132	0.0028	22.22	2.933e-06	0.00241	0.5069	0.00364	TRUE
		rs4785955	T	G	-0.0084	0.0017	24.42	6.389e-07	-0.00107	0.7525	0.0034	TRUE
		rs4810349	T	C	0.0068	0.0014	23.59	4.91e-07	0.00103	0.7088	0.00276	TRUE
		rs76881621	T	C	-0.0192	0.0042	20.9	4.777e-06	-0.0022	0.7937	0.00838	TRUE
		rs7930227	A	G	-0.0068	0.0014	23.59	2.065e-06	-0.00087	0.7633	0.00288	TRUE
THICK_posteriorcingulate	Protein	rs11138251	T	C	-0.0081	0.0018	20.25	4.05e-06	-0.00179	0.6795	0.00434	TRUE
		rs112138247	T	C	-0.0121	0.0026	21.66	3.922e-06	0.00746	0.218	0.00606	TRUE
		rs116212874	A	G	0.0192	0.0041	21.93	3.081e-06	0.00107	0.9204	0.0107	TRUE
		rs12612855	T	C	0.0055	0.0012	21.01	4.491e-06	-0.00136	0.6466	0.00296	TRUE
		rs12884411	A	C	0.005	0.0011	20.66	3.912e-06	0.00241	0.4403	0.00313	TRUE
		rs13398130	T	C	0.007	0.0015	21.78	1.656e-06	0.00421	0.2425	0.0036	TRUE
		rs2415142	T	G	0.0051	0.0011	21.5	3.875e-06	-0.00323	0.2433	0.00277	TRUE
		rs56120749	A	T	-0.0083	0.0018	21.26	2.782e-06	0.00276	0.5236	0.00433	TRUE
		rs61570328	A	G	-0.0067	0.0011	37.1	1.657e-09	0.00687	0.01585	0.00285	TRUE
		rs8011016	T	C	-0.0077	0.0015	26.35	1.176e-07	0.00545	0.1129	0.00344	TRUE
		rs9485495	A	T	0.0098	0.0021	21.78	3.461e-06	-0.006	0.2395	0.0051	TRUE
SA_insula	Sugar	rs10798780	A	G	-7.4184	1.5577	22.68	1.912e-06	-0.00374	0.2076	0.00297	TRUE
		rs10888796	T	C	9.8351	1.8948	26.94	2.096e-07	-0.00073	0.8371	0.00353	TRUE
		rs114035640	T	C	-25.381	5.4046	22.05	2.651e-06	0.00573	0.5792	0.01032	TRUE
		rs12304222	C	G	7.9016	1.6853	21.98	2.75e-06	0.00697	0.0254	0.00312	TRUE
		rs145394106	A	G	-21.6675	4.5988	22.2	2.458e-06	-0.01483	0.0919	0.0088	TRUE
		rs2268438	A	G	-7.8411	1.6549	22.45	2.158e-06	0.0003	0.9262	0.00317	TRUE
		rs243045	A	G	7.9876	1.6836	22.51	2.092e-06	-0.00168	0.5942	0.00315	TRUE
		rs28583226	A	G	-7.4397	1.5624	22.67	1.92e-06	0.00283	0.3435	0.00299	TRUE
		rs309596	T	C	10.476	1.8985	30.45	3.428e-08	0.00745	0.04216	0.00366	TRUE
		rs4265197	T	C	7.3357	1.5537	22.29	2.342e-06	-0.00481	0.1035	0.00295	TRUE
		rs4768701	A	G	-8.4886	1.753	23.45	1.283e-06	-0.00417	0.1692	0.00303	TRUE
		rs55787425	A	T	7.5629	1.6165	21.89	2.89e-06	0.00035	0.9078	0.00302	TRUE
		rs58066679	A	G	14.1695	2.9933	22.41	2.204e-06	0.00448	0.4135	0.00547	TRUE
		rs61779314	T	C	-9.3464	2.0211	21.39	3.757e-06	-0.00652	0.08377	0.00377	TRUE
		rs6467287	A	G	-7.8109	1.5644	24.93	5.947e-07	0.00341	0.249	0.00296	TRUE
		rs67268350	T	C	46.6257	9.5865	23.66	1.152e-06	-0.0122	0.6405	0.02613	TRUE
		rs6739199	T	C	8.6708	1.7309	25.09	5.46e-07	-2e-05	0.9951	0.00328	TRUE
		rs6926494	T	C	30.4249	6.2122	23.99	9.702e-07	0.01278	0.2718	0.01163	TRUE
		rs6988493	T	C	-7.1827	1.5716	20.89	4.867e-06	-0.00604	0.04241	0.00298	TRUE
		rs72801662	A	G	-49.5307	10.6055	21.81	3.008e-06	-0.0019	0.8819	0.01274	TRUE
		rs73551565	T	C	-8.5549	1.8561	21.24	4.045e-06	-0.0042	0.2221	0.00344	TRUE
		rs74355340	T	C	13.7584	2.8225	23.76	1.091e-06	0.00663	0.2207	0.00541	TRUE
		rs757368	C	G	11.9236	2.5095	22.58	2.02e-06	0.0002	0.9656	0.00475	TRUE
		rs77341180	A	G	-44.4427	9.4717	22.02	2.703e-06	-0.01817	0.1206	0.01171	TRUE
		rs9375452	T	C	10.2244	1.8985	29	7.226e-08	0.00267	0.454	0.00357	TRUE
		rs9457882	T	C	-17.4359	3.8058	20.99	4.618e-06	-0.00628	0.3869	0.00726	TRUE
		rs9514978	A	G	-7.2141	1.571	21.09	4.391e-06	-6e-05	0.9831	0.00296	TRUE
SA_lingual	Sugar	rs1014444	A	G	13.4806	2.7571	23.91	1.011e-06	-0.00124	0.6917	0.00312	TRUE
		rs10237280	T	C	16.7557	2.7866	36.16	1.822e-09	-0.00684	0.0245	0.00304	TRUE
		rs112197170	A	G	32.6133	6.984	21.81	3.016e-06	-0.01221	0.02515	0.00545	TRUE
		rs113336697	T	C	-27.5798	5.6773	23.6	1.186e-06	0.01356	0.01104	0.00533	TRUE
		rs114972581	T	C	-57.8097	12.643	20.91	4.82e-06	0.00783	0.3602	0.00856	TRUE
		rs12136078	T	C	14.4727	3.1134	21.61	3.342e-06	0.00324	0.351	0.00347	TRUE
		rs12508031	A	T	-21.6379	4.4931	23.19	1.466e-06	0.0022	0.5139	0.00337	TRUE
		rs13038914	T	C	15.4848	2.7831	30.96	2.639e-08	0.00164	0.5936	0.00307	TRUE
		rs1327864	C	G	-14.4793	2.7861	27.01	2.025e-07	0.00196	0.5294	0.00311	TRUE
		rs1341823	A	G	-17.2462	3.7414	21.25	4.036e-06	-0.00456	0.26	0.00405	TRUE
		rs16864372	A	G	-25.0591	5.3893	21.62	3.323e-06	-0.00917	0.1261	0.006	TRUE
		rs1934057	T	C	-16.8361	2.7846	36.56	1.484e-09	-0.0024	0.4292	0.00303	TRUE
		rs2219320	T	C	-14.3996	3.1215	21.28	3.968e-06	0.00376	0.2674	0.00339	TRUE
		rs2520269	T	C	-13.6294	2.9429	21.45	3.636e-06	0.00381	0.2415	0.00326	TRUE
		rs2693833	A	G	12.3871	2.6546	21.77	3.067e-06	0.00089	0.7635	0.00296	TRUE
		rs28412122	A	G	-18.7645	3.2261	33.83	6.011e-09	-0.00309	0.3804	0.00353	TRUE
		rs34092336	A	G	-23.2161	4.705	24.35	8.04e-07	0.00543	0.1882	0.00412	TRUE
		rs34622	A	G	14.3923	3.1151	21.35	3.833e-06	-0.0013	0.7404	0.00392	TRUE
		rs34721481	A	T	-17.0515	3.0292	31.69	1.812e-08	-0.0029	0.3795	0.0033	TRUE
		rs3818188	A	G	22.6817	4.3059	27.75	1.382e-07	-0.00372	0.347	0.00396	TRUE
		rs453555	T	C	34.5885	7.3429	22.19	2.471e-06	-0.00307	0.6671	0.00714	TRUE
		rs4663692	T	C	-18.9924	4.0267	22.25	2.398e-06	0.00602	0.1527	0.00421	TRUE
		rs61941461	T	C	15.2908	3.1583	23.44	1.289e-06	-0.00602	0.06768	0.0033	TRUE
		rs6603991	T	C	17.1338	3.3813	25.68	4.036e-07	-0.00135	0.7074	0.00361	TRUE
		rs6808509	A	C	12.3123	2.6614	21.4	3.723e-06	0.00177	0.5472	0.00295	TRUE
		rs73313052	A	G	-28.9284	4.0232	51.7	6.458e-13	0.0173	0.0001118	0.00448	TRUE
		rs73866285	T	C	37.8429	8.0358	22.18	2.486e-06	0.00439	0.5964	0.00828	TRUE
		rs76478992	A	G	-45.2582	9.5235	22.58	2.011e-06	-0.00208	0.8008	0.00827	TRUE
		rs77411063	T	C	-20.0126	4.3078	21.58	3.389e-06	-0.00936	0.04819	0.00474	TRUE
		rs7914158	T	C	15.3406	2.8026	29.96	4.407e-08	0.00284	0.3525	0.00306	TRUE
		rs7930532	A	G	-19.3514	3.0582	40.04	2.489e-10	0.00253	0.4208	0.00315	TRUE
		rs7936831	A	T	-90.6527	19.5966	21.4	3.729e-06	0.02939	0.07305	0.01639	TRUE
		rs7973779	A	G	18.7638	4.0453	21.51	3.512e-06	-0.00128	0.7815	0.00463	TRUE
		rs910697	A	G	15.966	2.7419	33.91	5.78e-09	0.00222	0.452	0.00295	TRUE
		rs9545145	A	G	-12.5972	2.6678	22.3	2.336e-06	-0.00326	0.2687	0.00295	TRUE
		rs983741	A	C	-18.6634	3.1447	35.22	2.942e-09	0.00235	0.5056	0.00353	TRUE
SA_medialorbitofrontal	Sugar	rs12022854	T	C	8.9042	1.8576	22.98	1.64e-06	-0.00139	0.7521	0.0044	TRUE
		rs1333996	T	C	6.7533	1.439	22.02	2.69e-06	-0.00048	0.8831	0.00327	TRUE
		rs148184316	A	G	-40.0772	7.7444	26.78	2.28e-07	0.0372	0.0408	0.01818	TRUE
		rs1541999	C	G	8.7965	1.8086	23.66	1.153e-06	-0.00433	0.2217	0.00354	TRUE
		rs1986725	A	C	-6.0585	1.2888	22.1	2.592e-06	-0.00047	0.8752	0.00302	TRUE
		rs2514467	T	C	-7.5476	1.4687	26.41	2.763e-07	0.00403	0.2406	0.00344	TRUE
		rs61795077	T	G	-14.1503	2.9973	22.29	2.347e-06	-0.00037	0.936	0.00465	TRUE
		rs6949428	A	G	-6.3992	1.337	22.91	1.699e-06	0.00206	0.5083	0.00312	TRUE
		rs7124681	A	C	6.573	1.2898	25.97	3.466e-07	0.00011	0.971	0.003	TRUE
THICK_caudalanteriorcingulate	Sugar	rs10518920	A	C	0.0132	0.0029	20.72	4.066e-06	-0.00584	0.2494	0.00507	TRUE
		rs117174116	A	G	-0.0436	0.0085	26.31	2.944e-07	-0.00677	0.5191	0.01049	TRUE
		rs138502605	C	G	-0.0291	0.0057	26.06	3.677e-07	-0.00745	0.3998	0.00885	TRUE
		rs140220606	A	C	-0.0179	0.0039	21.07	3.59e-06	-0.00529	0.4081	0.00639	TRUE
		rs17184754	T	C	0.0281	0.0061	21.22	4.804e-06	0.01854	0.03167	0.00863	TRUE
		rs2060060	A	G	-0.0082	0.0018	20.75	3.497e-06	-0.00109	0.7124	0.00295	TRUE
		rs722395	T	C	-0.0087	0.0018	23.36	2.476e-06	-0.00773	0.01382	0.00314	TRUE
		rs73528979	A	G	0.012	0.0025	23.04	1.925e-06	0.00477	0.2609	0.00424	TRUE
		rs77863985	T	G	0.0518	0.0103	25.29	4.811e-07	-0.00031	0.9784	0.01131	TRUE

## Sheet: Global
Supplementary Table 7.2 Detailed information of instrumental variables used in MR analyses
Cortical regions (exposure)	Food type (outcome)	SNP	Effect allele	Other allele	Exposure (Cortical regions)				Outcome (Food type)
					Beta	SE	F	P-value	Beta	SE	P-value	mr_keep
Full_SurfArea1	alcohol_overallfreq	rs10878349	A	G	1016.24	130.285	60.84	6.182e-15	0.00842687	0.00209262	0.00011	TRUE
		rs199503	A	G	-1668.59	168.914	97.58	5.167e-23	-0.0160616	0.00253978	2.1e-10	TRUE
		rs284849	T	G	1034.93	163.333	40.15	2.353e-10	0.00859818	0.00264783	0.00069	TRUE
		rs3817176	T	C	1351.44	182.067	55.1	1.147e-13	0.000701991	0.00291218	0.81	TRUE
		rs4273712	A	G	-1169.86	148.14	62.36	2.857e-15	-0.00119801	0.00235969	0.58	TRUE
		rs7477335	A	C	733.872	134.15	29.93	4.487e-08	9.67325e-05	0.00208836	0.91	TRUE
