# Supplementary material for: Unveiling the influence of daily dietary patterns on brain cortical structure: insights from bidirectional Mendelian randomization
Source: Royal Society of Chemistry journal article supplement (doi:10.1039/d3fo02879h), 2023-01-01
Supplement: d3fo02879h8.xlsx [file d3fo02879h8.xlsx]

## Sheet: Regions
Supplementary Table 8.1 Detailed information of instrumental variables used in MR analyses
Cortical regions (exposure)	Food type (outcome)	nSNP	Pleiotropy			Heterogenenity
			MR-egger P-value	MR-egger P-value	MR-PRESSO	IVW test P-value	MR-egger P-value
THICK_caudalanteriorcingulate	alcohol_overallfreq	10	0.341358	0.341358	0.7767	0.776756	0.799142
THICK_parsorbitalis	alcohol_overallfreq	12	0.587945	0.587945	0.9077	0.894937	0.866704
THICK_lingual	anyalcohol_glassespermonth	14	0.811092	0.811092	0.5979	0.0242122	0.0162122
SA_caudalanteriorcingulate	beef_overallfreq	15	0.365458	0.365458	0.2977	0.260533	0.257504
SA_lingual	beef_overallfreq	39	0.706749	0.706749	NA	0.003696	0.00285587
THICK_postcentral	beef_overallfreq	24	0.744228	0.744228	0.096	0.0744268	0.0587094
SA_insula	cereal_bowlsperweek	29	0.465663	0.465663	0.4528	0.000406318	0.000376389
SA_rostralmiddlefrontal	cereal_bowlsperweek	30	0.43462	0.43462	0.1282	3.72004e-07	3.9682e-07
THICK_parahippocampal	cheese_overallfreq	26	0.801692	0.801692	NA	0.000610999	0.000408913
THICK_superiortemporal	cheese_overallfreq	11	0.658749	0.658749	0.1625	0.132337	0.100921
SA_parstriangularis	coffee_cupsperday	27	0.87914	0.87914	0.3569	0.376548	0.326072
SA_posteriorcingulate	coffee_cupsperday	24	0.882126	0.882126	0.0901	0.0758814	0.0581496
THICK_lateraloccipital	coffee_cupsperday	13	0.737925	0.737925	0.6345	0.61016	0.53504
THICK_lateralorbitofrontal	coffee_cupsperday	7	0.925329	0.925329	0.8794	0.880113	0.793778
SA_frontalpole	cookedveg_TBSperday	11	0.251511	0.251511	0.9686	0.968806	0.992276
THICK_precentral	cookedveg_TBSperday	14	0.663181	0.663181	0.6731	0.00544049	0.0038328
SA_fusiform	doyouaddsalt	19	0.998014	0.998014	0.9749	0.973824	0.959699
THICK_temporalpole	doyouaddsalt	6	0.808039	0.808039	0.9832	0.981397	0.956092
SA_frontalpole	freshfruit_piecesperday	11	0.569962	0.569962	0.4644	0.404671	0.348066
SA_fusiform	freshfruit_piecesperday	19	0.434575	0.434575	NA	0.000194078	0.000202269
SA_parsopercularis	freshfruit_piecesperday	20	0.959444	0.959444	0.1933	0.164764	0.128557
SA_posteriorcingulate	freshfruit_piecesperday	24	0.134498	0.134498	0.7554	0.746552	0.826379
SA_precuneus	freshfruit_piecesperday	31	0.339637	0.339637	0.4095	0.403338	0.400945
THICK_isthmuscingulate	freshfruit_piecesperday	28	0.752154	0.752154	0.5089	0.50771	0.457927
SA_parsopercularis	hotdrinktemp	20	0.686395	0.686395	0.0908	0.075161	0.0592906
SA_pericalcarine	lambmutton_overallfreq	39	0.810757	0.810757	NA	0.0160808	0.01248
SA_parsopercularis	milk_typeused_bin5	20	0.746874	0.746874	0.5913	0.55818	0.498446
THICK_caudalanteriorcingulate	milk_typeused_bin5	10	0.726676	0.726676	0.9822	0.983669	0.971983
THICK_cuneus	milk_typeused_bin5	8	0.590022	0.590022	0.2585	0.244223	0.194104
THICK_caudalanteriorcingulate	milk_typeused_bin9	10	0.721098	0.721098	0.9582	0.953081	0.926377
SA_inferiortemporal	nonoilyfish_overallfreq	27	0.821109	0.821109	0.0724	0.0606603	0.0471718
SA_medialorbitofrontal	nonoilyfish_overallfreq	10	0.88532	0.88532	0.9806	0.978732	0.95911
THICK_cuneus	nonoilyfish_overallfreq	8	0.477836	0.477836	0.8986	0.894706	0.887996
THICK_inferiortemporal	nonoilyfish_overallfreq	18	0.963273	0.963273	0.8986	0.374263	0.310551
THICK_posteriorcingulate	nonoilyfish_overallfreq	13	0.354926	0.354926	0.5552	0.534265	0.529934
THICK_rostralanteriorcingulate	nonoilyfish_overallfreq	23	0.61428	0.61428	NA	0.00814291	0.00639143
THICK_superiorparietal	nonoilyfish_overallfreq	14	0.568259	0.568259	0.326	0.343704	0.298426
SA_transversetemporal	oilyfish_overallfreq	35	0.845873	0.845873	NA	3.62204e-05	2.37162e-05
THICK_caudalanteriorcingulate	oilyfish_overallfreq	10	0.632792	0.632792	0.088	0.073582	0.0549452
THICK_paracentral	oilyfish_overallfreq	14	0.519009	0.519009	0.1964	0.156452	0.135556
THICK_precentral	oilyfish_overallfreq	14	0.0282191	0.0282191	0.0908	0.00170738	0.0406605
THICK_superiortemporal	oilyfish_overallfreq	11	0.395289	0.395289	0.4753	0.0417121	0.0434875
SA_medialorbitofrontal	pork_overallfreq	10	0.772366	0.772366	0.6291	0.691492	0.604028
SA_parstriangularis	pork_overallfreq	27	0.796715	0.796715	0.2856	0.283373	0.241724
SA_temporalpole	pork_overallfreq	15	0.31609	0.31609	0.3561	0.405498	0.411445
THICK_cuneus	pork_overallfreq	8	0.76977	0.76977	0.7493	0.736259	0.639294
THICK_lateralorbitofrontal	pork_overallfreq	7	0.641092	0.641092	0.993	0.991565	0.989212
THICK_postcentral	pork_overallfreq	24	0.156364	0.156364	0.1159	0.119452	0.164027
SA_posteriorcingulate	rawveg_TBSperday	24	0.861763	0.861763	0.6545	0.0104166	0.00732881
SA_superiorparietal	rawveg_TBSperday	28	0.625626	0.625626	NA	0.00355535	0.00277813
SA_isthmuscingulate	tea_cupsperday	20	0.0914576	0.0914576	NA	0.0123929	0.0363796
SA_lateraloccipital	tea_cupsperday	20	0.746878	0.746878	0.4018	7.48122e-16	3.87706e-16
THICK_caudalanteriorcingulate	tea_cupsperday	10	0.271416	0.271416	0.0886	0.0694961	0.0951999
THICK_medialorbitofrontal	tea_cupsperday	14	0.394316	0.394316	0.1312	0.10829	0.106522
THICK_precentral	tea_cupsperday	14	0.903805	0.903805	0.386	0.0269326	0.0176206
SA_posteriorcingulate	water_glassesperday	24	0.47856	0.47856	NA	0.0299098	0.0269367
SA_superiortemporal	water_glassesperday	22	0.383834	0.383834	0.1071	9.38363e-05	0.000110534
THICK_frontalpole	water_glassesperday	12	0.914826	0.914826	0.762	0.749539	0.670036
THICK_inferiorparietal	water_glassesperday	13	0.805928	0.805928	0.6622	0.643122	0.564234
SA_frontalpole	Carbohydrate	10	0.889562	0.889562	0.6536	0.673902	0.577507
THICK_caudalanteriorcingulate	Carbohydrate	9	0.952595	0.952595	0.698	0.668856	0.562923
THICK_cuneus	Carbohydrate	8	0.663438	0.663438	0.0622	0.0442378	0.0304118
THICK_inferiortemporal	Carbohydrate	15	0.239347	0.239347	0.1818	0.163848	0.197661
THICK_parsorbitalis	Carbohydrate	11	0.0232726	0.0232726	0.2914	0.27407	0.857964
THICK_temporalpole	Carbohydrate	6	0.437067	0.437067	0.904	0.883748	0.910293
SA_entorhinal	Fat	14	0.647954	0.647954	0.9351	0.932497	0.90937
SA_rostralmiddlefrontal	Fat	28	0.588438	0.588438	0.3047	0.290774	0.260066
THICK_middletemporal	Fat	10	0.878677	0.878677	0.6264	0.592543	0.493715
THICK_parsorbitalis	Protein	11	0.90016	0.90016	0.8932	0.874883	0.814805
THICK_posteriorcingulate	Protein	11	0.901384	0.901384	0.3765	0.369837	0.287966
SA_insula	Sugar	27	0.587164	0.587164	0.3522	0.337912	0.303992
SA_lingual	Sugar	36	0.0463327	0.0463327	0.1106	0.0137063	0.0400888
SA_medialorbitofrontal	Sugar	9	0.365068	0.365068	0.7935	0.793304	0.811267
THICK_caudalanteriorcingulate	Sugar	9	0.448905	0.448905	0.3161	0.268203	0.244355

## Sheet: Global
Supplementary Table 8.2 Detailed information of instrumental variables used in MR analyses
Cortical regions (exposure)	Food type (outcome)	nSNP	Pleiotropy		Heterogenenity
			MR-egger P-value	MR-PRESSO	IVW test P-value	MR-egger P-value
Full_SurfArea	alcohol_overallfreq	6	0.411844	NA	0.000197432	0.000494499
